# Supplementary material
Source: PubMed Central journal article supplement (PMC8642277)
Supplement: NIHMS1741366-supplement-tS1.pdf [file NIHMS1741366-supplement-tS1.pdf]

Supplementary table 1: Identified metabolites with raw p-value below 0.05

| Metabolites                                   | IV-Alcohol self-administration (IV-ASA) |         |                       |        |       |       |        |       | IV-Alcohol clamp (IV-AC)   |          |                       |       |       |       |         |        |       |
|-----------------------------------------------|-----------------------------------------|---------|-----------------------|--------|-------|-------|--------|-------|----------------------------|----------|-----------------------|-------|-------|-------|---------|--------|-------|
|                                               | Area Under the Curve (AUC)              |         | IV-Ghrelin or Placebo |        |       |       |        |       | Area Under the Curve (AUC) |          | IV-Ghrelin or Placebo |       |       |       |         |        |       |
|                                               | p                                       | q       | Baseline              | IV-ASA |       |       | BrAC=0 | p     | q                          | Baseline | Post-LD               | IV-AC |       |       | Post-AC | BrAC=0 |       |
|                                               |                                         | d       | d                     | d      | d     | d     |        |       | d                          | d        | d                     | d     | d     | d     |         |        |       |
| <b>Steroids and steroid derivatives</b>       |                                         |         |                       |        |       |       |        |       |                            |          |                       |       |       |       |         |        |       |
| Cortisol                                      | 1.39E-07                                | 0.00032 | 2.68                  | 0.09   | 3.21  | 2.39  | 4.93   | -0.49 | 4.63E-12                   | 1.21E-08 | 3.01                  | -0.11 | 2.86  | 3.38  | 3.14    | 2.96   | -0.30 |
| Corticosterone                                | 0.00017                                 | 0.02513 | 3.16                  | -0.14  | 7.54  | 3.50  | 6.77   | -0.38 | 4.59E-08                   | 3.46E-05 | 4.11                  | -0.24 | 5.40  | 4.05  | 4.93    | 5.03   | -0.31 |
| Cortisone                                     | 0.00037                                 | 0.03522 | 0.51                  | 0.18   | 0.39  | 0.74  | 1.36   | -0.55 | 0.07717                    | 0.52368  | 0.49                  | -0.02 | -0.05 | 0.32  | 0.93    | 1.03   | -0.01 |
| Glycochenodeoxycholic acid                    | 0.00042                                 | 0.03749 | 0.81                  | 0.10   | 1.15  | 0.91  | 1.23   | 1.05  | 5.04E-06                   | 0.00132  | 0.44                  | -0.23 | 0.65  | 0.88  | 0.41    | 0.40   | -0.41 |
| Glycocholic acid                              | 0.03954                                 | 0.31968 | 0.38                  | -0.09  | 0.80  | 0.44  | 0.76   | 0.64  | 2.12E-08                   | 0.00002  | 0.59                  | -0.21 | 0.76  | 1.27  | 0.59    | 0.55   | -0.28 |
| Glycolithocholic acid                         | 7.04E-06                                | 0.00436 | 1.56                  | 1.34   | 1.86  | 1.83  | 0.90   | 4.97  | 0.01742                    | 0.28131  | 1.56                  | 0.60  | 2.89  | 1.99  | 1.28    | 0.82   | -0.13 |
| Chenodeoxycholic acid                         | 0.63258                                 | 0.84427 | -0.18                 | 0.48   | -0.01 | -0.20 | -0.02  | -0.59 | 0.01788                    | 0.28587  | 1.46                  | 0.12  | 0.75  | 1.89  | 2.80    | 2.53   | 1.04  |
| Deoxycholic acid                              | 0.03963                                 | 0.31968 | 0.37                  | 0.56   | 0.49  | 0.27  | 0.54   | 0.27  | 0.10005                    | 0.57198  | 0.69                  | -0.12 | 0.48  | 0.90  | 1.08    | 1.15   | 1.18  |
| Murocholic acid                               | 0.00066                                 | 0.04994 | 0.78                  | 0.69   | 1.06  | 0.72  | 0.98   | 0.44  | 0.22094                    | 0.73754  | 0.53                  | -0.07 | 0.46  | 0.65  | 0.72    | 0.77   | 0.63  |
| Taurocholic acid                              | 0.05473                                 | 0.35632 | 0.73                  | -0.07  | 2.05  | 0.63  | 0.65   | 0.62  | 0.02734                    | 0.34682  | 0.95                  | -0.37 | 1.24  | 2.25  | 0.82    | 0.74   | -0.46 |
| Cholesterol                                   | 0.62083                                 | 0.83900 | -0.16                 | 0.90   | -0.06 | -0.38 | 0.47   | -0.16 | 0.04047                    | 0.40966  | -0.32                 | -0.04 | -0.02 | -0.48 | -0.35   | -0.31  | -0.49 |
| 7-Ketocholesterol                             | 0.0421                                  | 0.22592 | -0.61                 | -0.43  | -0.24 | -0.41 | -0.77  | -0.17 | 0.03366                    | 0.37697  | -0.36                 | -0.40 | -0.38 | -0.38 | -0.29   | -0.39  | -0.39 |
| 7α-Hydroxy-3-oxo-4-cholestenoic acid          | 0.00425                                 | 0.13262 | -0.82                 | -0.51  | -0.44 | -0.47 | -0.24  | -0.94 | 0.00238                    | 0.09584  | -0.49                 | -0.17 | -0.24 | -0.70 | -0.56   | -0.52  | -0.55 |
| <b>Fatty acids and conjugates</b>             |                                         |         |                       |        |       |       |        |       |                            |          |                       |       |       |       |         |        |       |
| FA 18:1                                       | 0.00047                                 | 0.04061 | 1.91                  | 0.01   | 0.58  | 1.50  | 3.92   | -0.27 | 0.80154                    | 0.96981  | -0.09                 | -0.21 | 0.31  | -0.27 | -0.06   | -0.18  | -0.04 |
| FA 18:2                                       | 0.00081                                 | 0.05743 | 1.52                  | -0.10  | 0.57  | 1.13  | 2.57   | -0.06 | 0.48437                    | 0.89681  | -0.20                 | -0.29 | 0.19  | -0.35 | -0.20   | -0.29  | -0.11 |
| FA 18:3                                       | 0.00029                                 | 0.03203 | 1.62                  | -0.14  | 0.61  | 1.08  | 2.85   | 0.06  | 0.89308                    | 0.98433  | -0.07                 | -0.02 | 0.38  | -0.21 | -0.16   | -0.16  | -0.09 |
| FA 20:1                                       | 0.00140                                 | 0.07596 | 1.31                  | 0.09   | 0.22  | 0.73  | 4.50   | -0.03 | 0.75971                    | 0.96233  | 0.06                  | -0.28 | 0.33  | -0.03 | 0.37    | -0.19  | 0.02  |
| FA 20:2                                       | 0.00199                                 | 0.08952 | 1.44                  | 0.01   | 0.43  | 1.08  | 3.27   | 0.19  | 0.78288                    | 0.96604  | -0.18                 | -0.26 | 0.01  | -0.27 | -0.10   | -0.22  | 0.02  |
| FA 20:3                                       | 0.00905                                 | 0.18722 | 1.27                  | 0.08   | 0.29  | 0.90  | 2.92   | -0.07 | 0.48923                    | 0.89833  | -0.23                 | -0.33 | 0.00  | -0.39 | -0.15   | -0.22  | -0.10 |
| FA 22:4                                       | 0.00311                                 | 0.11456 | 1.31                  | 0.14   | 0.44  | 0.93  | 3.00   | 0.13  | 0.81367                    | 0.97170  | -0.12                 | -0.23 | 0.23  | -0.34 | -0.06   | -0.06  | -0.06 |
| FA 22:5                                       | 0.00160                                 | 0.08127 | 1.48                  | 0.10   | 1.28  | 0.67  | 2.77   | 0.05  | 0.75052                    | 0.96177  | 0.11                  | -0.01 | 0.47  | -0.09 | 0.16    | 0.10   | -0.10 |
| Pimelic acid                                  | 0.06411                                 | 0.37337 | -0.49                 | 0.34   | 0.30  | -0.38 | -0.59  | 0.32  | 0.00765                    | 0.18480  | 1.08                  | -0.21 | 0.64  | 0.25  | 1.45    | 1.46   | -0.02 |
| Azelaic acid                                  | 0.05760                                 | 0.36190 | -0.73                 | -0.05  | 0.60  | 0.21  | -0.52  | 0.61  | 0.00721                    | 0.17915  | 0.33                  | 0.20  | 0.27  | 0.07  | 0.53    | 0.53   | 1.69  |
| 2-Ethyl-2-hydroxybutyric acid                 | 0.82674                                 | 0.93452 | 0.17                  | 0.35   | 0.57  | 0.26  | 0.26   | -0.27 | 0.02628                    | 0.34210  | 1.00                  | 0.59  | 1.20  | 1.13  | 0.92    | 0.55   | 0.33  |
| 2-Hydroxystearic acid                         | 0.86435                                 | 0.94948 | 0.04                  | 0.29   | 0.30  | 1.11  | 3.80   | -0.02 | 0.00069                    | 0.04500  | 0.21                  | 0.57  | 0.59  | 0.50  | 0.77    | 0.17   | 0.03  |
| <b>Glycerophospholipids</b>                   |                                         |         |                       |        |       |       |        |       |                            |          |                       |       |       |       |         |        |       |
| <b>Glycerophosphocholine</b>                  |                                         |         |                       |        |       |       |        |       |                            |          |                       |       |       |       |         |        |       |
| LPC 15:0                                      | 0.01057                                 | 0.19956 | -0.33                 | -0.07  | 0.12  | -0.26 | -0.03  | -0.36 | 0.71154                    | 0.95307  | -0.04                 | -0.16 | -0.05 | 0.08  | 0.16    | 0.06   | -0.26 |
| LPC 16:0                                      | 0.01576                                 | 0.23335 | -0.53                 | -0.13  | -0.21 | -0.52 | -0.39  | -0.16 | 0.26683                    | 0.77916  | -0.21                 | -0.31 | -0.07 | -0.18 | -0.20   | -0.23  | -0.23 |
| LPC 17:0                                      | 0.03435                                 | 0.30469 | -0.43                 | 0.04   | 0.05  | -0.20 | -0.40  | -0.40 | 0.10729                    | 0.58531  | -0.15                 | -0.13 | 0.01  | -0.13 | -0.13   | -0.18  | -0.35 |
| LPC 18:0                                      | 0.01644                                 | 0.23740 | -0.56                 | -0.10  | -0.33 | -0.50 | -0.40  | -0.30 | 0.64867                    | 0.93906  | 0.05                  | 0.02  | -0.04 | 0.04  | 0.14    | 0.25   | -0.13 |
| LPC 18:1                                      | 0.02538                                 | 0.27880 | -0.43                 | 0.05   | -0.11 | -0.36 | -0.20  | -0.46 | 0.40358                    | 0.85894  | 0.03                  | 0.12  | 0.03  | 0.03  | 0.20    | -0.02  | -0.25 |
| LPC 18:2                                      | 0.01107                                 | 0.20358 | -0.41                 | -0.07  | -0.14 | -0.31 | -0.16  | -0.40 | 0.64755                    | 0.93902  | 0.16                  | 0.22  | 0.19  | 0.16  | 0.26    | 0.11   | -0.04 |
| LPC 18:3                                      | 0.02339                                 | 0.27047 | -0.44                 | -0.21  | -0.11 | -0.17 | -0.17  | -0.55 | 0.60172                    | 0.92848  | 0.08                  | 0.11  | 0.10  | 0.05  | 0.21    | 0.09   | -0.26 |
| LPC 18:3                                      | 0.35667                                 | 0.67579 | -0.12                 | -0.01  | 0.06  | 0.10  | 0.15   | -0.04 | 0.01723                    | 0.28048  | 1.09                  | 0.49  | 0.91  | 1.59  | 1.06    | 0.74   | 0.45  |
| LPC 20:1                                      | 0.01287                                 | 0.21626 | -0.46                 | -0.15  | -0.18 | -0.41 | -0.30  | -0.47 | 0.68682                    | 0.94918  | 0.03                  | 0.15  | 0.04  | 0.06  | 0.15    | -0.07  | -0.14 |
| LPC 20:2                                      | 0.02272                                 | 0.26757 | -0.42                 | -0.14  | -0.18 | -0.25 | -0.16  | -0.39 | 0.31952                    | 0.81506  | -0.06                 | 0.04  | -0.03 | -0.04 | -0.01   | 0.00   | -0.26 |
| LPC 20:4                                      | 0.03081                                 | 0.29558 | -0.35                 | -0.04  | -0.06 | -0.14 | 0.01   | -0.62 | 0.74943                    | 0.96150  | 0.21                  | 0.17  | 0.24  | 0.17  | 0.22    | 0.22   | 0.03  |
| LPC 22:4                                      | 0.00145                                 | 0.07706 | -0.25                 | -0.06  | -0.14 | -0.10 | 0.10   | -0.39 | 0.69698                    | 0.95100  | 0.22                  | 0.33  | 0.25  | 0.14  | 0.35    | 0.23   | 0.03  |
| LPC 22:5                                      | 0.00643                                 | 0.15780 | -0.32                 | -0.09  | -0.16 | -0.26 | 0.16   | -0.29 | 0.91664                    | 0.98809  | 0.14                  | 0.21  | 0.17  | 0.02  | 0.26    | 0.24   | -0.12 |
| LPC 22:6                                      | 0.00739                                 | 0.16879 | -0.44                 | -0.24  | -0.26 | -0.45 | -0.04  | -0.58 | 0.43129                    | 0.87439  | 0.14                  | 0.18  | 0.32  | 0.11  | 0.14    | 0.24   | -0.20 |
| LPC O-16:1                                    | 0.02131                                 | 0.26291 | -0.42                 | -0.03  | -0.16 | -0.31 | -0.26  | -0.41 | 0.53462                    | 0.91346  | 0.06                  | 0.18  | 0.12  | 0.01  | 0.25    | -0.06  | -0.09 |
| LPC O-18:1                                    | 0.03162                                 | 0.29806 | -0.50                 | -0.06  | -0.12 | -0.42 | -0.32  | -0.35 | 0.77340                    | 0.96458  | 0.05                  | 0.15  | 0.13  | 0.02  | 0.18    | -0.07  | -0.11 |
| LPE 16:0                                      | 0.01432                                 | 0.22637 | -0.43                 | -0.09  | -0.07 | -0.35 | -0.37  | -0.38 | 0.45306                    | 0.88306  | -0.10                 | -0.15 | -0.07 | -0.03 | 0.14    | -0.02  | -0.40 |
| LPE 16:1e                                     | 0.02315                                 | 0.26959 | -0.46                 | -0.10  | -0.30 | -0.42 | -0.28  | -0.36 | 0.67237                    | 0.94613  | 0.29                  | 0.47  | 0.41  | 0.38  | 0.20    | 0.22   | -0.06 |
| LPE 18:1e                                     | 0.01806                                 | 0.24514 | -0.44                 | -0.04  | -0.40 | -0.37 | -0.25  | -0.39 | 0.87557                    | 0.98217  | 0.15                  | 0.30  | 0.21  | 0.19  | 0.13    | 0.15   | -0.15 |
| LPE O-16:1                                    | 0.01915                                 | 0.25205 | -0.47                 | -0.11  | -0.30 | -0.41 | -0.32  | -0.41 | 0.62871                    | 0.93494  | 0.30                  | 0.45  | 0.44  | 0.32  | 0.26    | 0.22   | 0.00  |
| LPE O-18:1                                    | 0.02624                                 | 0.28103 | -0.41                 | -0.02  | -0.24 | -0.41 | -0.25  | -0.39 | 0.66040                    | 0.94253  | 0.10                  | 0.21  | 0.18  | 0.14  | 0.14    | 0.10   | -0.21 |
| PC 36:2                                       | 0.04954                                 | 0.34580 | -0.43                 | 0.15   | -0.13 | -0.79 | 0.51   | -0.49 | 0.84513                    | 0.97699  | -0.12                 | 0.21  | -0.26 | -0.09 | -0.34   | 0.13   | 0.23  |
| PC 37:4 (17:0_20:4)                           | 0.03434                                 | 0.30469 | -0.52                 | -0.07  | -0.42 | -0.39 | -0.02  | -0.43 | 0.64563                    | 0.93826  | 0.21                  | 0.88  | 0.05  | 0.16  | 0.13    | -0.10  | 0.86  |
| PC 38:3                                       | 0.04520                                 | 0.33570 | -0.46                 | -0.29  | -0.11 | -0.68 | -0.19  | 0.41  | 0.42644                    | 0.87132  | -0.29                 | -0.25 | -0.53 | 0.00  | 0.09    | -0.13  | -0.46 |
| SM 32:1                                       | 0.17401                                 | 0.51940 | -0.30                 | 0.37   | -0.25 | -0.61 | 0.16   | -0.23 | 0.03407                    | 0.37841  | -0.38                 | -0.38 | -0.13 | -0.44 | -0.28   | -0.37  | -0.59 |
| SM 33:1                                       | 0.52486                                 | 0.79035 | -0.18                 | 0.39   | -0.14 | -0.42 | 0.29   | 0.10  | 0.02823                    | 0.35068  | -0.28                 | -0.14 | -0.07 | -0.37 | -0.26   | -0.24  | -0.45 |
| SM 36:3                                       | 0.02904                                 | 0.28980 | -0.32                 | 0.27   | -0.24 | -0.47 | -0.07  | -0.11 | 0.26468                    | 0.77684  | 0.21                  | 0.10  | 0.14  | 0.18  | 0.25    | 0.29   | 0.01  |
| SM 30:1                                       | 0.19487                                 | 0.54004 | -0.24                 | 0.04   | -0.18 | -0.35 | 0.04   | -0.33 | 0.01155                    | 0.22902  | -0.54                 | -0.64 | -0.60 | -0.58 | -0.47   | -0.62  | -0.58 |
| SM 32:1                                       | 0.11990                                 | 0.45565 | -0.32                 | 0.33   | -0.18 | -0.63 | 0.02   | -0.22 | 0.04140                    | 0.41354  | -0.37                 | -0.36 | -0.23 | -0.40 | -0.27   | -0.32  | -0.57 |
| SM 36:2                                       | 0.52666                                 | 0.79154 | -0.06                 | 0.59   | -0.49 | 0.44  | -0.45  | 0.70  | 0.00847                    | 0.19719  | -0.20                 | -0.23 | 0.35  | -0.23 | -0.20   | -0.11  | -0.41 |
| DG 34:2                                       | 0.72954                                 | 0.88980 | -0.01                 | 0.48   | 0.02  | -0.29 | 0.51   | -0.10 | 0.00197                    | 0.08610  | -0.22                 | -0.27 | -0.31 | -0.43 | -0.01   | -0.17  | -0.20 |
| <b>Amino acids and amino acid metabolites</b> |                                         |         |                       |        |       |       |        |       |                            |          |                       |       |       |       |         |        |       |
| 1-Methylhistidine                             | 0.03058                                 | 0.29493 | 1.02                  | 0.41   | 1.18  | 0.33  | 0.52   | -0.02 | 0.13836                    | 0.63846  | -0.60                 | -1.99 | -0.86 | 0.64  | 0.07    | -0.24  | -0.07 |
| 3-Methyl-2-oxovaleric acid                    | 0.38086                                 | 0.69511 | 0.22                  | 0.56   | 1.30  | 0.47  | 0.23   | -0.21 | 0.02030                    | 0.30170  | 0.55                  | 0.24  | 0.33  | 0.51  | 1.03    | 0.50   | -0.06 |
| Asparagine                                    | 0.66795                                 | 0.86123 | 0.09                  | 0.20   | 0.67  | 0.42  | -0.03  | -0.66 | 0.00266                    | 0.10318  | 0.55                  | 0.    |       |       |         |        |       |
