# Supplementary material
Source: PubMed Central journal article supplement (PMC8642277)
Supplement: NIHMS1741366-supplement-tS2.pdf [file NIHMS1741366-supplement-tS2.pdf]

Supplementary table 2: All molecular features measured in descending order based on level of identification and m/z value

Legend: red / blue background, increased / decreased compared to placebo; gray background, p or q value < 0.05; AC, acylcarnitine; BrAc=0, breath alcohol concentration = 0.00; d, Cohen's d effect size; FA, fatty acid; LPC, lysophosphocholine; LPE, lysophosphoethanolamine; p, raw p-value; PC, phosphocholine; Post-LD, post loading dose; Post-AC, post alcohol clamp; q, false discovery rate corrected q-value

| Feature_ID             | Mode  | Ionization | Average Rt.min. | Average Mz | Metabolite                    | MSMS                                                                                                                  | ID_Level | HMDB_ID     | IV-Alcohol self-administration (IV-ASA) |         |       |                       |       |       |       |       |                            |         | IV-Alcohol clamp (IV-AC) |       |       |       |       |       |       |   |   |   |
|------------------------|-------|------------|-----------------|------------|-------------------------------|-----------------------------------------------------------------------------------------------------------------------|----------|-------------|-----------------------------------------|---------|-------|-----------------------|-------|-------|-------|-------|----------------------------|---------|--------------------------|-------|-------|-------|-------|-------|-------|---|---|---|
|                        |       |            |                 |            |                               |                                                                                                                       |          |             | Area Under the Curve (AUC)              |         |       | IV-Ghrelin or Placebo |       |       |       |       | Area Under the Curve (AUC) |         | IV-Ghrelin or Placebo    |       |       |       |       | IV-AC |       |   |   |   |
|                        |       |            |                 |            |                               |                                                                                                                       |          |             | p                                       | q       | d     | d                     | d     | d     | d     | d     | d                          | p       | q                        | d     | d     | d     | d     | d     | d     | d | d | d |
| HILICpos_120.0655_5.8  | HILIC | pos        | 5.8             | 120.0655   | Threonine                     | 74.0602 (100), 56.0501 (45), 102.0548 (40), 120.0652 (20), 84.0441 (5)                                                | 1        | HMD8000167  | 0.49744                                 | 0.77461 | 0.23  | 0.42                  | 0.94  | 0.40  | 0.15  | -0.57 | 0.03323                    | 0.37479 | 1.30                     | 0.94  | 1.31  | 1.43  | 1.20  | 1.10  | 0.06  |   |   |   |
| HILICneg_124.0077_5.41 | HILIC | neg        | 5.41            | 124.0077   | Taurine                       | 124.0079 (100), 79.9576 (55), 106.9814 (5)                                                                            | 1        | HMD80000251 | 0.52529                                 | 0.79066 | 0.19  | 0.42                  | 0.50  | 0.15  | 0.41  | 0.81  | 0.07004                    | 0.50701 | 0.10                     | -0.10 | 0.17  | 0.22  | 0.23  | 0.24  | -0.54 |   |   |   |
| HILICpos_126.0219_5.33 | HILIC | pos        | 5.33            | 126.0219   | Taurine                       | 126.0219 (100), 108.0110 (50)                                                                                         | 1        | HMD80000251 | 0.59041                                 | 0.81932 | 0.17  | 0.48                  | 0.47  | 0.18  | 0.44  | 0.51  | 0.06742                    | 0.59052 | 0.13                     | -0.15 | 0.14  | 0.27  | 0.24  | 0.32  | -0.45 |   |   |   |
| HILICneg_130.0514_1.65 | HILIC | neg        | 1.65            | 130.0514   | N-Acetyl-L-alanine            | 88.0410 (100), 130.0506 (5), 61.9883 (3)                                                                              | 1        | HMD80000756 | 0.60251                                 | 0.83031 | -0.14 | 0.04                  | 0.42  | 0.01  | 0.18  | -0.05 | 0.02175                    | 0.31168 | 0.32                     | 0.25  | 0.51  | 0.40  | 0.46  | 0.31  | -0.20 |   |   |   |
| HILICpos_130.0864_4.95 | HILIC | pos        | 4.95            | 130.0864   | p-Pipecolic acid              | 84.0808 (100), 130.0865 (80), 74.0966 (5), 57.0705 (3)                                                                | 1        | HMD80000716 | 0.10280                                 | 0.43550 | 0.55  | 0.51                  | 0.84  | 0.66  | 0.68  | 0.53  | 0.22552                    | 0.74228 | 0.60                     | 0.55  | 0.66  | 0.62  | 0.59  | 0.64  | 0.64  |   |   |   |
| HILICneg_131.0466_6.29 | HILIC | neg        | 6.29            | 131.0466   | L-Asparagine                  | 114.0198 (100), 113.0366 (60), 70.0297 (45), 95.0257 (30), 131.0467 (25), 72.0091 (15), 71.0252 (10), 58.0294 (5)     | 1        | HMD80000168 | 0.66795                                 | 0.86123 | 0.09  | 0.20                  | 0.67  | 0.42  | -0.03 | -0.66 | 0.00266                    | 0.10318 | 0.55                     | 0.46  | 0.56  | 1.04  | 0.47  | 0.14  | -0.59 |   |   |   |
| HILICpos_132.0766_5.57 | HILIC | pos        | 5.57            | 132.0766   | Creatine                      | 132.0766 (100), 90.0552 (95), 114.0661 (5), 87.0559 (5), 115.0500 (2)                                                 | 1        | HMD80000064 | 0.21979                                 | 0.56178 | -0.25 | -0.08                 | 0.10  | -0.19 | -0.31 | -0.28 | 0.02657                    | 0.34375 | -0.08                    | 0.03  | 0.00  | 0.21  | -0.08 | -0.18 | -0.49 |   |   |   |
| HILICpos_132.102_3.95  | HILIC | pos        | 3.95            | 132.1020   | Leucine                       | 86.0968 (100), 132.1011 (70)                                                                                          | 1        | HMD80000687 | 0.57802                                 | 0.81714 | 0.14  | 0.30                  | 1.35  | 0.30  | -0.08 | -0.67 | 0.01921                    | 0.29348 | 0.82                     | 0.42  | 1.51  | 1.79  | 0.72  | 0.16  | -0.43 |   |   |   |
| HILICpos_133.0607_6.25 | HILIC | pos        | 6.25            | 133.0607   | L-Asparagine                  | 74.0240 (100), 87.0550 (80), 133.0612 (30), 116.0338 (20)                                                             | 1        | HMD80000168 | 0.83303                                 | 0.93719 | 0.05  | 0.20                  | 0.67  | 0.51  | -0.09 | -0.69 | 0.00912                    | 0.20279 | 0.59                     | 0.43  | 0.65  | 1.02  | 0.44  | 0.20  | -0.62 |   |   |   |
| HILICpos_133.0969_7.14 | HILIC | pos        | 7.14            | 133.0969   | Ornithine                     | 70.0657 (100), 116.0705 (85), 115.0863 (15), 133.0976 (5)                                                             | 1        | HMD80000214 | 0.67808                                 | 0.86643 | 0.10  | 0.34                  | 0.55  | 0.08  | -0.04 | -0.07 | 0.00491                    | 0.14733 | 0.09                     | 0.08  | 0.09  | 0.48  | 0.06  | -0.12 | -0.19 |   |   |   |
| HILICpos_137.0456_1.38 | HILIC | pos        | 1.38            | 137.0456   | Hypoxanthine                  | 137.0463 (100), 119.0347 (3), 110.0345 (2), 94.0399 (2)                                                               | 1        | HMD80000157 | 0.39961                                 | 0.70831 | -0.26 | -0.15                 | 0.37  | -0.40 | -0.11 | 0.58  | 0.31680                    | 0.81306 | 0.56                     | 0.06  | 0.23  | 1.00  | 0.80  | 1.17  | -0.32 |   |   |   |
| HILICpos_137.0709_2.13 | HILIC | pos        | 2.13            | 137.0709   | 1-Methylnicotinamide          | 137.0706 (100), 94.0650 (5)                                                                                           | 1        | HMD80000699 | 0.99789                                 | 0.99910 | 0.00  | -0.08                 | 0.18  | -0.09 | 0.05  | 0.56  | 0.00149                    | 0.07291 | 2.36                     | 1.81  | 2.15  | 2.53  | 2.93  | 2.53  | 1.14  |   |   |   |
| HILICpos_138.0549_4.18 | HILIC | pos        | 4.18            | 138.0549   | Trigonelline                  | 138.0547 (100), 94.0650 (3), 110.0596 (3), 92.0498 (2)                                                                | 1        | HMD80000875 | 0.39000                                 | 0.70135 | -0.24 | -0.04                 | -0.20 | -0.24 | -0.19 | -0.11 | 0.13379                    | 0.63100 | -0.61                    | -0.47 | -0.48 | -0.60 | -0.64 | -0.64 | -0.50 |   |   |   |
| HILICpos_139.0500_1.06 | HILIC | pos        | 1.06            | 139.0500   | Urocanic acid                 | 139.0495 (100), 121.0395 (60), 95.0603 (10), 93.0443 (5), 97.0651 (5)                                                 | 1        | HMD80000031 | 0.55682                                 | 0.80773 | -0.04 | 0.15                  | 0.34  | 0.00  | 0.01  | -0.31 | 0.41268                    | 0.86451 | 0.25                     | 0.57  | 1.13  | -0.10 | -0.04 | -0.02 | -0.16 |   |   |   |
| HILICpos_144.1018_4.24 | HILIC | pos        | 4.24            | 144.1018   | Proline betaine               | 144.1012 (100)                                                                                                        | 1        | HMD80004827 | 0.45022                                 | 0.74416 | -0.13 | -0.03                 | -0.07 | -0.03 | -0.14 | -0.33 | 0.73363                    | 0.95843 | 0.04                     | -0.09 | -0.06 | -0.05 | 0.46  | 0.03  | -0.19 |   |   |   |
| HILICneg_145.062_6.17  | HILIC | neg        | 6.17            | 145.0620   | L-Glutamine                   | 127.0521 (100), 145.0627 (80), 115.9212 (50), 128.0360 (45), 109.0407 (30), 84.0458 (30), 74.0248 (15), 101.0727 (15) | 1        | HMD80000641 | 0.89504                                 | 0.96183 | -0.01 | 0.11                  | 0.46  | 0.13  | 0.14  | -0.17 | 0.00417                    | 0.13364 | 0.34                     | 0.43  | 0.49  | 0.58  | 0.41  | 0.21  | -0.13 |   |   |   |
| HILICneg_146.0462_6.41 | HILIC | neg        | 6.41            | 146.0462   | L-Glutamic acid               | 102.0563 (100), 128.0359 (50), 146.0457 (35)                                                                          | 1        | HMD80000148 | 0.24231                                 | 0.58303 | -0.28 | -0.21                 | -0.16 | -0.22 | -0.15 | -0.30 | 0.00856                    | 0.19791 | -0.63                    | -0.64 | -0.67 | -0.17 | -0.74 | -0.70 | -0.22 |   |   |   |
| RPpos_146.0603_2.82    | RP    | pos        | 2.82            | 146.0603   | Indole-3-carboxaldehyde       | 118.0648 (100), 146.0603 (80)                                                                                         | 1        | HMD80029737 | 0.12375                                 | 0.45914 | -0.25 | 0.20                  | 0.58  | -0.07 | -0.58 | -0.67 | 0.88594                    | 0.98286 | -0.05                    | -0.01 | 0.06  | 0.13  | 0.12  | -0.19 | -0.44 |   |   |   |
| HILICpos_147.0764_6.13 | HILIC | pos        | 6.13            | 147.0764   | L-Glutamine                   | 130.0498 (100), 84.0449 (75), 123.9638 (20), 147.0753 (15), 101.0712 (10)                                             | 1        | HMD80000641 | 0.72486                                 | 0.88798 | 0.05  | 0.17                  | 0.53  | 0.18  | 0.18  | -0.15 | 0.00875                    | 0.19987 | 0.35                     | 0.41  | 0.37  | 0.61  | 0.47  | 0.28  | -0.10 |   |   |   |
| HILICpos_147.1127_7.08 | HILIC | pos        | 7.08            | 147.1127   | Lysine                        | 84.0808 (100), 130.0866 (75), 147.1128 (15)                                                                           | 1        | HMD80000182 | 0.95061                                 | 0.98160 | 0.04  | 0.35                  | 0.51  | 0.08  | -0.17 | -0.49 | 0.00586                    | 0.16148 | 0.57                     | 0.70  | 0.79  | 1.26  | 0.34  | 0.04  | -0.27 |   |   |   |
| HILICpos_148.0606_6.37 | HILIC | pos        | 6.37            | 148.0606   | L-Glutamic acid               | 84.0443 (100), 102.0549 (50), 130.0498 (50), 148.1113 (20)                                                            | 1        | HMD80000148 | 0.17825                                 | 0.52406 | -0.31 | -0.19                 | -0.16 | -0.21 | -0.26 | -0.26 | 0.00532                    | 0.15293 | -0.69                    | -0.83 | -0.81 | -0.25 | -0.74 | -0.76 | -0.19 |   |   |   |
| HILICpos_150.0584_4.61 | HILIC | pos        | 4.61            | 150.0584   | L-Methionine                  | 104.0523 (100), 133.0320 (80), 56.0501 (65), 150.0573 (25), 102.0500 (25), 61.0113 (20), 87.0265 (5), 74.0602 (5)     | 1        | HMD80000696 | 0.84901                                 | 0.94348 | 0.06  | 0.22                  | 0.98  | 0.22  | -0.19 | -0.60 | 0.00459                    | 0.14155 | 0.74                     | 0.52  | 0.96  | 1.28  | 0.62  | 0.42  | -0.48 |   |   |   |
| HILICneg_151.0267_1.76 | HILIC | neg        | 1.76            | 151.0267   | Xanthine                      | 151.0262 (100), 108.0208 (35)                                                                                         | 1        | HMD80000292 | 0.20215                                 | 0.54699 | -0.32 | -0.09                 | -0.04 | -0.46 | 0.03  | -0.02 | 0.77994                    | 0.96563 | -0.16                    | 0.32  | 0.05  | 0.38  | -0.19 | -0.13 | -0.27 |   |   |   |
| RPneg_151.0406_4.035   | RP    | neg        | 4.035           | 151.0406   | 2-Hydroxyphenylacetic acid    | 107.0521 (100), 0.57827 (5)                                                                                           | 1        | HMD80000669 | 0.57827                                 | 0.81725 | 0.17  | 0.22                  | 0.76  | 0.64  | 0.35  | -0.40 | 0.23859                    | 0.75656 | 0.55                     | -0.11 | 0.17  | 0.57  | 1.02  | 0.84  | 0.13  |   |   |   |
| HILICpos_151.144_1.46  | HILIC | pos        | 1.46            | 151.1440   | Trimethylamine N-oxide [ZM+H] | 76.0763 (100), 151.1441 (3), 59.0733 (3), 58.0657 (3)                                                                 | 1        | HMD80000925 | 0.09110                                 | 0.41995 | 0.52  | 0.22                  | 0.42  | 0.50  | 0.73  | 0.81  | 0.03744                    | 0.39437 | 0.21                     | 0.29  | 0.24  | 0.20  | 0.19  | 0.16  | 0.24  |   |   |   |
| HILICneg_154.0625_6.98 | HILIC | neg        | 6.98            | 154.0625   | L-Histidine                   | 154.0618 (100), 137.0353 (50), 93.0466 (50), 96.9701 (50), 110.0721 (20)                                              | 1        | HMD80000177 | 0.51981                                 | 0.78761 | 0.17  | 0.25                  | 0.80  | 0.46  | 0.08  | -0.33 | 0.01801                    | 0.28702 | 0.37                     | 0.32  | 0.42  | 0.79  | 0.55  | 0.18  | -0.26 |   |   |   |
| HILICpos_162.1125_4.79 | HILIC | pos        | 4.79            | 162.1125   | L-Carnitine                   | 162.1123 (100), 103.0389 (10), 60.0814 (5)                                                                            | 1        | HMD80000062 | 0.29413                                 | 0.62573 | -0.15 | 0.09                  | 0.14  | 0.11  | 0.06  | -0.56 | 0.24390                    | 0.76002 | -0.12                    | -0.11 | -0.14 | -0.10 | -0.11 | -0.08 | -0.08 |   |   |   |
| HILICpos_166.0861_3.87 | HILIC | pos        | 3.87            | 166.0861   | Phenylalanine                 | 120.0802 (100), 166.0862 (10), 131.0491 (5)                                                                           | 1        | HMD80000159 | 0.80712                                 | 0.92594 | -0.07 | 0.20                  | 1.30  | 0.20  | -0.28 | -0.78 | 0.00072                    | 0.04583 | 1.40                     | 0.97  | 2.86  | 2.58  | 1.56  | 0.83  | -0.48 |   |   |   |
| RPpos_166.0863_2.12    | RP    | pos        | 2.12            | 166.0863   | L-Phenylalanine               | 120.0811 (100), 166.0858 (10), 103.0540 (3)                                                                           | 1        | HMD80000159 | 0.55584                                 | 0.80724 | -0.16 | 0.11                  | 1.06  | 0.07  | -0.26 | -0.69 | 0.00014                    | 0.01508 | 1.15                     | 0.96  | 2.34  | 2.04  | 1.49  | 1.13  | -0.07 |   |   |   |
| HILICneg_168.0785_6.98 | HILIC | neg        | 6.98            | 168.0785   | 3-Methylhistidine             | 168.0788 (100), 151.0513 (60), 72.0092 (25)                                                                           | 1        | HMD80000479 | 0.84419                                 | 0.94184 | 0.11  | 0.17                  | 0.42  | 0.20  | 0.14  | -0.15 | 0.75943                    | 0.96233 | 0.00                     | 0.00  | 0.09  | 0.11  | 0.05  | -0.06 | -0.33 |   |   |   |
| HILICneg_173.1046_6.98 | HILIC | neg        | 6.98            | 173.1046   | L-Arginine                    | 131.0822 (100), 173.1039 (10), 156.0789 (5), 114.0567 (2)                                                             | 1        | HMD80000117 | 0.88138                                 | 0.95611 | -0.08 | 0.15                  | 0.38  | 0.16  | -0.02 | -0.52 | 0.12327                    | 0.61276 | 0.15                     | 0.25  | 0.29  | 0.47  | 0.07  | -0.18 | -0.24 |   |   |   |
| HILICneg_174.0887_6.41 | HILIC | neg        | 6.41            | 174.0887   | Citulline                     | 131.0822 (100), 174.0879 (5)                                                                                          | 1        | HMD80000904 | 0.04010                                 | 0.32043 | -0.44 | 0.12                  | -0.05 | -0.25 | -0.25 | -0.75 | 0.90008                    | 0.98550 | -0.06                    | 0.34  | 0.20  | 0.15  | -0.35 | -0.39 | -0.04 |   |   |   |
| HILICpos_175.1189_6.95 | HILIC | pos        | 6.95            | 175.1189   | L-Arginine                    | 175.1186 (100), 60.0562 (45), 116.0706 (45), 70.0657 (40), 130.0979 (15), 158.0926 (15)                               | 1        | HMD80000517 | 0.86904                                 | 0.95103 | 0.01  | 0.22                  | 0.41  | 0.19  | -0.02 | -0.52 | 0.06073                    | 0.48151 | 0.21                     | 0.31  | 0.34  | 0.54  | 0.07  | -0.05 | -0.25 |   |   |   |
| HILICneg_176.0391_1.32 | HILIC | neg        | 1.32            | 176.0391   | N-Formylmethionine            | 98.0253 (100), 128.0359 (80), 176.0394 (45), 84.0455 (30)                                                             | 1        | HMD80000105 | 0.60028                                 | 0.82875 | -0.10 | 0.14                  | 0.55  | 0.21  | 0.18  | -0.33 | 0.22605                    | 0.74307 | 0.18                     | 0.10  | 0.32  | 0.08  | 0.35  | 0.18  | -0.29 |   |   |   |
| RPpos_176.0708_5.2     | RP    | pos        | 5.2             | 176.0708   | Indoleacetic acid             | 130.0653 (100), 176.0698 (20)                                                                                         | 1        | HMD80000197 | 0.77748                                 | 0.91243 | 0.04  | -0.01                 | 0.11  | 0.07  | 0.01  | 0.74  | 0.18046                    | 0.69564 | 0.11                     | 0.04  | 0.04  | 0.11  | 0.20  | 0.19  | 0.14  |   |   |   |
| RPpos_177.1022_1.61    | RP    | pos        | 1.61            |            |                               |                                                                                                                       |          |             |                                         |         |       |                       |       |       |       |       |                            |         |                          |       |       |       |       |       |       |   |   |   |

| Feature_ID             | Mode  | Ionization | Average.Rt.min. | Average.Mz | Metabolite                           | MSMS                                                                                                                                                                                                                    | ID_Level | HMDB_ID     | IV-Alcohol self-administration (IV-ASA) |         |       |                       |        |       |        |       |         |                            | IV-Alcohol clamp (IV-AC) |         |                       |       |         |        |       |   |  |  |
|------------------------|-------|------------|-----------------|------------|--------------------------------------|-------------------------------------------------------------------------------------------------------------------------------------------------------------------------------------------------------------------------|----------|-------------|-----------------------------------------|---------|-------|-----------------------|--------|-------|--------|-------|---------|----------------------------|--------------------------|---------|-----------------------|-------|---------|--------|-------|---|--|--|
|                        |       |            |                 |            |                                      |                                                                                                                                                                                                                         |          |             | Area Under the Curve (AUC)              |         |       | IV-Ghrelin or Placebo |        |       |        |       |         | Area Under the Curve (AUC) |                          |         | IV-Ghrelin or Placebo |       |         |        |       |   |  |  |
|                        |       |            |                 |            |                                      |                                                                                                                                                                                                                         |          |             | p                                       | q       | d     | Baseline              | IV-ASA |       | BrAc=0 | p     | q       | d                          | Baseline                 | Post-LD | IV-AC                 |       | Post-AC | BrAc=0 |       |   |  |  |
|                        |       |            |                 |            |                                      |                                                                                                                                                                                                                         |          |             |                                         |         |       |                       | d      | d     |        |       |         |                            |                          |         | d                     | d     |         |        | d     | d |  |  |
| RPpos_206.0811_4.74    | RP    | pos        | 4.74            | 206.0811   | Indolelactic acid                    | 188.0703 (100), 160.0761 (90), 206.0819 (90), 118.0648 (65), 130.0653 (50), 146.0603 (50), 170.0603 (25)                                                                                                                | 1        | HMD80000671 | 0.57684                                 | 0.81658 | 0.07  | 0.25                  | 0.46   | 0.40  | 0.26   | -0.06 | 0.05405 | 0.46076                    | -0.07                    | -0.15   | -0.10                 | -0.10 | 0.00    | -0.02  | 0.07  |   |  |  |
| RPpos_209.0922_1.89    | RP    | pos        | 1.89            | 209.0922   | Kynurenine                           | 192.0644 (100), 94.0657 (95), 146.0602 (60), 136.0757 (50), 174.0548 (40), 150.0550 (35), 120.0449 (20), 74.0239 (15), 99.0079 (10), 118.0640 (10)                                                                      | 1        | HMD80000684 | 0.00398                                 | 0.12882 | -0.67 | -0.58                 | -0.01  | -0.68 | -0.93  | -0.83 | 0.58179 | 0.92438                    | -0.19                    | -0.23   | -0.17                 | -0.23 | -0.03   | -0.04  | -0.23 |   |  |  |
| RPneg_212.00262_2.635  | RP    | neg        | 2.635           | 212.0026   | Indoxyl sulfate                      | 212.0013 (100), 79.9574 (90), 80.9651 (75), 132.0451 (25)                                                                                                                                                               | 1        | HMD80000682 | 0.01027                                 | 0.19784 | 0.39  | 0.42                  | 0.53   | 0.54  | 0.43   | 0.61  | 0.99811 | 0.99953                    | 0.00                     | -0.10   | -0.06                 | -0.01 | -0.06   | 0.02   | 0.57  |   |  |  |
| HILICneg_218.1033_1.06 | HILIC | neg        | 1.06            | 218.1033   | Pantothenic acid (B5)                | 88.0409 (100), 146.0823 (55), 218.1033 (30), 71.0512 (10)                                                                                                                                                               | 1        | HMD80000210 | 0.09658                                 | 0.42632 | 0.21  | 0.03                  | 0.69   | 0.35  | 0.51   | -0.36 | 0.28554 | 0.79324                    | 0.48                     | 0.17    | 0.79                  | 0.56  | 0.47    | 0.36   | -0.01 |   |  |  |
| RPneg_218.10342_2.524  | RP    | neg        | 2.524           | 218.1034   | Pantothenic acid (B5)                | 88.0408 (100), 146.0817 (50), 218.1030 (25), 71.0512 (10)                                                                                                                                                               | 1        | HMD80000210 | 0.80962                                 | 0.92703 | -0.08 | -0.07                 | 0.21   | 0.02  | 0.11   | -0.43 | 0.75999 | 0.96245                    | 0.32                     | 0.24    | 0.41                  | 0.33  | 0.30    | 0.21   | 0.34  |   |  |  |
| HILICpos_218.1388_2.02 | HILIC | pos        | 2.02            | 218.1388   | AC 3:0 (Propionylcarnitine)          | 85.0285 (100), 218.1373 (65), 159.0643 (25), 60.0816 (15)                                                                                                                                                               | 1        | HMD80000824 | 0.11063                                 | 0.44551 | 0.46  | 0.45                  | 0.90   | 0.70  | 0.37   | 0.41  | 0.96382 | 0.99621                    | 0.13                     | 0.08    | 0.10                  | 0.67  | 0.23    | 0.18   | -0.37 |   |  |  |
| HILICpos_232.1543_1.55 | HILIC | pos        | 1.55            | 232.1543   | AC 4:0 (Butyrylcarnitine)            | 85.0285 (100), 232.1555 (70), 173.0812 (25), 60.0814 (10), 71.0494 (2)                                                                                                                                                  | 1        | HMD80002013 | 0.65920                                 | 0.85739 | 0.08  | 0.15                  | 0.46   | 0.33  | 0.22   | -0.31 | 0.06797 | 0.50154                    | -0.05                    | -0.04   | 0.05                  | 0.07  | 0.01    | -0.15  | -0.41 |   |  |  |
| HILICpos_235.1654_3.6  | HILIC | pos        | 3.6             | 235.1654   | Glycine betaine [2M+H] <sup>+</sup>  | 118.0856 (100), 235.1640 (5), 58.0653 (1), 59.0737 (1)                                                                                                                                                                  | 1        | HMD80000043 | 0.88926                                 | 0.95973 | -0.07 | 0.01                  | 0.11   | 0.04  | -0.03  | -0.44 | 0.00000 | 0.00037                    | 0.50                     | 0.45    | 0.47                  | 0.56  | 0.50    | 0.45   | 0.37  |   |  |  |
| RPneg_239.09233_7.722  | RP    | neg        | 7.722           | 239.0923   | CMPPF                                | 195.1020 (100), 151.1137 (50), 239.0940 (25)                                                                                                                                                                            | 1        | HMD80061112 | 0.38228                                 | 0.69575 | -0.06 | 0.01                  | 0.13   | -0.11 | 0.04   | -0.29 | 0.93118 | 0.98982                    | 0.06                     | -0.02   | 0.11                  | 0.07  | 0.05    | 0.11   | 0.02  |   |  |  |
| HILICpos_241.0309_7.71 | HILIC | pos        | 7.71            | 241.0309   | L-Cystine                            | 151.9833 (100), 120.0115 (70), 241.0325 (55), 122.0270 (35), 74.0240 (30), 195.0245 (15), 153.9991 (5)                                                                                                                  | 1        | HMD80000192 | 0.42774                                 | 0.72875 | -0.06 | 0.33                  | 0.26   | -0.06 | -0.17  | 0.09  | 0.57968 | 0.92405                    | 0.04                     | 0.23    | 0.06                  | -0.09 | 0.02    | -0.02  | 0.16  |   |  |  |
| HILICneg_243.062_1.5   | HILIC | neg        | 1.5             | 243.0620   | Uridine                              | 110.0246 (100), 200.0578 (40), 243.0632 (25), 162.8384 (25), 152.0345 (25), 140.0363 (15), 82.0302 (15), 66.0350 (5)                                                                                                    | 1        | HMD80000296 | 0.00466                                 | 0.13729 | -0.68 | -0.30                 | -0.40  | -0.76 | -0.62  | -0.32 | 0.04657 | 0.43198                    | -0.56                    | -0.09   | -0.08                 | -0.19 | -0.81   | -1.15  | -0.60 |   |  |  |
| HILICpos_246.1695_1.26 | HILIC | pos        | 1.26            | 246.1695   | AC 5:0 (Isovalerylcarnitine)         | 85.0285 (100), 246.1713 (75), 187.0956 (25), 60.0813 (10), 57.0704 (5), 144.1010 (3)                                                                                                                                    | 1        | HMD80000688 | 0.83781                                 | 0.93904 | -0.02 | 0.12                  | 0.40   | 0.28  | -0.31  | -0.17 | 0.69663 | 0.95088                    | 0.03                     | 0.02    | -0.02                 | -0.09 | 0.18    | 0.45   | -0.37 |   |  |  |
| RPneg_255.2328_11.1    | RP    | neg        | 11.1            | 255.2328   | FA 16:0                              | 255.2314 (100)                                                                                                                                                                                                          | 1        | HMD80000220 | 0.49195                                 | 0.77237 | 0.28  | -0.09                 | -0.57  | 0.44  | 2.31   | 0.19  | 0.30686 | 0.80665                    | -0.17                    | -0.14   | -0.30                 | -0.33 | -0.34   | 0.04   | 0.36  |   |  |  |
| HILICpos_258.1099_6.22 | HILIC | pos        | 6.22            | 258.1099   | Glycerophosphocholine                | 104.1067 (100), 258.1081 (40), 184.0748 (5), 124.9994 (5), 86.0968 (5)                                                                                                                                                  | 1        | HMD80000086 | 0.01057                                 | 0.19956 | -0.33 | -0.07                 | 0.12   | -0.26 | -0.03  | -0.36 | 0.71154 | 0.95307                    | -0.04                    | -0.16   | -0.05                 | 0.08  | 0.16    | 0.06   | -0.26 |   |  |  |
| HILICpos_260.1859_1.05 | HILIC | pos        | 1.05            | 260.1859   | AC 6:0 (Hexanoylcarnitine)           | 85.0285 (100), 260.1856 (75), 201.1112 (25), 60.0812 (10)                                                                                                                                                               | 1        | HMD80000076 | 0.13061                                 | 0.46758 | 0.62  | 0.17                  | 0.76   | 0.69  | 1.36   | -0.08 | 0.42301 | 0.86988                    | 0.24                     | 0.37    | 0.33                  | 0.25  | 0.04    | 0.19   | 0.10  |   |  |  |
| HILICneg_267.0733_2.57 | HILIC | neg        | 2.57            | 267.0733   | Inosine                              | 135.0315 (100), 267.0738 (60), 02.0259 (2), 108.0208 (2)                                                                                                                                                                | 1        | HMD80000195 | 0.03170                                 | 0.29834 | -0.44 | -0.21                 | -0.26  | -0.32 | -0.49  | 0.37  | 0.51854 | 0.90847                    | -0.40                    | -0.12   | 0.15                  | -0.65 | -0.67   | -0.57  | 0.30  |   |  |  |
| RPneg_267.07352_1.68   | RP    | neg        | 1.68            | 267.0735   | Inosine                              | 135.0320 (100), 267.0720 (55)                                                                                                                                                                                           | 1        | HMD80000195 | 0.03249                                 | 0.30133 | -0.43 | -0.17                 | -0.20  | -0.32 | -0.52  | 0.37  | 0.58229 | 0.92442                    | -0.37                    | -0.02   | 0.17                  | -0.65 | -0.59   | -0.50  | 0.27  |   |  |  |
| HILICpos_268.1035_1.34 | HILIC | pos        | 1.34            | 268.1035   | Adenosine                            | 136.0609 (100), 268.1048 (20)                                                                                                                                                                                           | 1        | HMD80000050 | 0.90782                                 | 0.96591 | -0.13 | 0.12                  | 0.04   | -0.10 | -0.30  | -0.30 | 0.03593 | 0.38709                    | -0.38                    | -0.30   | -0.17                 | -0.52 | -0.41   | -0.32  | -0.64 |   |  |  |
| HILICpos_269.088_2.47  | HILIC | pos        | 2.47            | 269.0880   | Inosine                              | 137.0448 (100), 228.2330 (2)                                                                                                                                                                                            | 1        | HMD80000195 | 0.02541                                 | 0.27880 | -0.43 | -0.20                 | -0.22  | -0.33 | -0.50  | 0.38  | 0.52953 | 0.91140                    | -0.40                    | -0.12   | 0.16                  | -0.65 | -0.62   | -0.56  | 0.27  |   |  |  |
| RPneg_281.24774_11.193 | RP    | neg        | 11.193          | 281.2477   | FA 18:1                              | 281.2469 (100)                                                                                                                                                                                                          | 1        | HMD80000207 | 0.00047                                 | 0.04061 | 1.91  | 0.01                  | 0.58   | 1.50  | 3.92   | -0.27 | 0.80154 | 0.96981                    | -0.09                    | -0.21   | 0.31                  | -0.27 | -0.06   | -0.18  | -0.04 |   |  |  |
| RPneg_282.08444_1.681  | RP    | neg        | 1.681           | 282.0844   | Guanosine                            | 150.0246 (100), 282.0858 (25), 133.0163 (10), 108.0204 (5)                                                                                                                                                              | 1        | HMD80000133 | 0.05204                                 | 0.34974 | -0.44 | -0.16                 | -0.66  | -0.46 | 0.03   | 0.10  | 0.27826 | 0.78746                    | -0.33                    | -0.41   | 0.04                  | -0.86 | -0.42   | -0.69  | 0.17  |   |  |  |
| RPneg_283.26379_11.544 | RP    | neg        | 11.544          | 283.2638   | FA 18:0                              | 283.1079 (100)                                                                                                                                                                                                          | 1        | HMD80000827 | 0.73796                                 | 0.89426 | -0.07 | 0.06                  | 0.02   | 0.28  | 0.00   | 0.00  | 0.76954 | 0.96454                    | -0.08                    | -0.12   | -0.32                 | -0.20 | 0.18    | 0.06   | 0.63  |   |  |  |
| RPpos_288.2173_6.01    | RP    | pos        | 6.01            | 288.2173   | AC 8:0                               | 85.0284 (100), 288.2168 (75), 229.1446 (15), 60.0813 (10)                                                                                                                                                               | 1        | HMD80000791 | 0.20486                                 | 0.54889 | 0.54  | 0.38                  | 0.83   | 0.48  | 0.57   | -0.11 | 0.04894 | 0.44202                    | 0.67                     | 0.89    | 0.74                  | 0.60  | 0.13    | 0.63   | -0.05 |   |  |  |
| RPneg_303.23236_10.88  | RP    | neg        | 10.88           | 303.2324   | FA 20:4                              | 303.2352 (100)                                                                                                                                                                                                          | 1        | HMD80001043 | 0.14823                                 | 0.49049 | 0.50  | 0.28                  | 0.14   | -0.10 | 2.49   | 0.01  | 0.98705 | 0.99797                    | -0.05                    | -0.31   | 0.45                  | -0.35 | -0.27   | 0.09   | 0.15  |   |  |  |
| HILICpos_316.2485_0.71 | HILIC | pos        | 0.71            | 316.2485   | AC 10:0 (Decanoylcarnitine)          | 85.0285 (100), 316.2451 (65), 257.1740 (20), 60.0808 (10), 155.1421 (5), 144.1011 (3)                                                                                                                                   | 1        | HMD80000651 | 0.20213                                 | 0.54699 | 0.58  | 0.28                  | 0.93   | 0.61  | 0.55   | -0.12 | 0.05904 | 0.47684                    | 0.77                     | 0.68    | 0.87                  | 0.60  | 0.35    | 1.25   | -0.07 |   |  |  |
| RPneg_327.2309_10.85   | RP    | neg        | 10.85           | 327.2331   | FA 22:6 (DHA)                        | 327.2312 (100), 283.2428 (85), 59.0135 (70), 299.2565 (35), 229.1966 (25), 135.1190 (15), 249.1855 (5)                                                                                                                  | 1        | HMD80002183 | 0.06631                                 | 0.37859 | 0.46  | -0.06                 | 0.11   | 0.06  | 1.53   | -0.05 | 0.54384 | 0.91517                    | 0.16                     | 0.01    | 0.43                  | 0.16  | 0.26    | 0.20   | -0.12 |   |  |  |
| RPpos_347.2213_7.47    | RP    | pos        | 7.47            | 347.2213   | Corticosterone                       | based on exact mass, RP neg fragmentation and RT                                                                                                                                                                        | 1        | HMD80001547 | 0.00012                                 | 0.02025 | 3.22  | -0.15                 | 7.68   | 3.49  | 6.46   | -0.38 | 0.00000 | 0.00003                    | 4.20                     | -0.12   | 5.31                  | 3.90  | 5.12    | 5.48   | -0.32 |   |  |  |
| RPpos_361.2012_6.66    | RP    | pos        | 6.66            | 361.2012   | Cortisone                            | 361.1992 (100), 163.1115 (45), 121.0647 (5), 343.1868 (5), 301.1787 (5), 325.1787 (5), 145.1006 (5), 283.1694 (5), 265.1600 (3), 105.0694 (3), 267.1700 (3), 279.1757 (2), 285.1824 (2)                                 | 1        | HMD80002802 | 0.00037                                 | 0.03522 | 0.51  | 0.18                  | 0.39   | 0.74  | 1.36   | -0.55 | 0.07717 | 0.52368                    | 0.49                     | -0.02   | -0.05                 | 0.32  | 0.93    | 1.03   | -0.01 |   |  |  |
| RPpos_363.2168_6.9     | RP    | pos        | 6.9             | 363.2168   | Cortisol                             | 363.2195 (100), 121.0645 (50), 327.1959 (25), 309.1844 (20), 267.1740 (15), 97.0650 (15), 345.2043 (10), 269.1902 (10), 297.1850 (5), 281.1900 (5), 109.0651 (5), 84.9599 (5), 241.1596 (5), 187.1122 (5), 145.1005 (5) | 1        | HMD80000063 | 1.39E-07                                | 0.00032 | 2.68  | 0.09                  | 3.21   | 2.39  | 4.93   | -0.49 | 0.00000 | 0.00000                    | 3.01                     | -0.11   | 2.86                  | 3.38  | 3.14    | 2.96   | -0.30 |   |  |  |
| RPpos_372.3113_8.8     | RP    | pos        | 8.8             | 372.3113   | AC 14:0 (Myristoylcarnitine)         | 85.0285 (100), 372.3112 (70), 60.0813 (20), 313.2366 (10)                                                                                                                                                               | 1        | HMD80005066 | 0.70044                                 | 0.87748 | 0.15  | 0.26                  | 0.34   | 0.10  | 0.94   | 0.01  | 0.16357 | 0.67427                    | 0.47                     | 0.48    | 0.48                  | 0.43  | 0.61    | 0.40   | -0.03 |   |  |  |
| RPneg_391.21185_7.471  | RP    | neg        | 7.471           | 391.2119   | Corticosterone [M+FA-H] <sup>-</sup> | 391.2110 (100)                                                                                                                                                                                                          | 1        | HMD80001547 | 0.00017                                 | 0.02513 | 3.16  | -0.14                 | 7.54   | 3.50  | 6.77   | -0.38 | 0.00000 | 0.00003                    | 4.11                     | -0.24   | 5.40                  | 4.05  | 4.93    | 5.03   | -0.31 |   |  |  |
| RPneg_397.17807_6.902  | RP    | neg        | 6.902           | 397.1781   | Cortisol (M+Cl) <sup>-</sup>         | 397.1795 (100)                                                                                                                                                                                                          | 1        | HMD80000063 | 1.85E-07                                | 0.00037 | 2.61  | 0.12                  | 3.31   | 2.24  | 4.60   | -0.48 | 0.00000 | 0.00000                    | 2.85                     | -0.16   | 2.76                  | 3.32  | 3.09    | 2.81   | -0.34 |   |  |  |
| RPpos_400.3416_9.3     | RP    | pos        | 9.3             | 400.3416   | AC 16:0 (Palmitoylcarnitine)         | 85.0284 (100), 400.3435 (70), 60.0813 (15), 341.2657 (10), 144.1027 (5), 239.2369 (5)                                                                                                                                   | 1        | HMD80000222 | 0.94177                                 | 0.97871 | 0.05  | 0.39                  | 0.52   | -0.09 | 0.70   | 0.25  | 0.17994 | 0.69487                    | 0.40                     | 0.22    | 0.51                  | 1.00  | 0.63    | 0.34   | -0.23 |   |  |  |
| RPneg_405.19098_6.658  | RP    | neg        | 6.658           | 405.1910   | Cortisone (M+FA-H) <sup>-</sup>      | 329.1773 (100), 301.1818 (30), 137.0608 (10), 311.1664 (5), 109.0662 (5), 125.0608 (3), 149.0234 (5), 135.1172 (5), 161.1317 (5)                                                                                        | 1        | HMD80002802 | 0.00097                                 | 0.06299 | 0.48  | 0.12                  | 0.41   | 0.72  | 1.24   | -0.50 | 0.04584 | 0.43007                    | 0.53                     | -0.01   | 0.01                  | 0.36  | 0.93    | 1.15   | -0.09 |   |  |  |
| RPpos_410.3266_9.83    | RP    | pos</      |                 |            |                                      |                                                                                                                                                                                                                         |          |             |                                         |         |       |                       |        |       |        |       |         |                            |                          |         |                       |       |         |        |       |   |  |  |

| Feature_ID             | Mode    | Ionization | Average.Rt.min. | Average.Mz | Metabolite                    | IV-Alcohol self-administration (IV-ASA)                                                                                                                          |         |             |         |         |       |          |         |                            |         |         |         |         |       | IV-Alcohol clamp (IV-AC) |                       |       |       |       |          |         |                       |        |       |      |
|------------------------|---------|------------|-----------------|------------|-------------------------------|------------------------------------------------------------------------------------------------------------------------------------------------------------------|---------|-------------|---------|---------|-------|----------|---------|----------------------------|---------|---------|---------|---------|-------|--------------------------|-----------------------|-------|-------|-------|----------|---------|-----------------------|--------|-------|------|
|                        |         |            |                 |            |                               | MSMS                                                                                                                                                             |         |             |         |         |       | ID_Level | HMDB_ID | Area Under the Curve (AUC) |         |         |         |         |       | Baseline                 | IV-Ghrelin or Placebo |       |       |       | Baseline | Post-LD | IV-Ghrelin or Placebo |        |       |      |
|                        |         |            |                 |            |                               | p                                                                                                                                                                | q       | d           | d       | d       | d     |          |         | IV-ASA                     |         | BrAC=0  | p       | q       | d     |                          | d                     | d     | d     | IV-AC |          |         | Post-AC               | BrAC=0 |       |      |
|                        |         |            |                 |            |                               |                                                                                                                                                                  |         |             |         |         |       |          |         | 0.09404                    | 0.42302 |         |         |         |       |                          |                       |       |       | 0.29  |          |         |                       |        | -0.04 | 0.70 |
| 0.03954                | 0.31968 | 0.38       | -0.09           | 0.80       | 0.44                          | 0.76                                                                                                                                                             | 0.64    | 0.00000     | 0.00002 | 0.59    | -0.21 | 0.76     | 1.27    | 0.59                       | 0.55    | -0.28   |         |         |       |                          |                       |       |       |       |          |         |                       |        |       |      |
| RPneg_464.30185_8.69   | RP      | neg        | 8.69            | 464.3019   | Glycocholic acid              | 464.2981 (100), 74.0245 (30), 402.2984 (5)                                                                                                                       | 1       | HMD80001038 | 0.09404 | 0.42302 | 0.29  | -0.04    | 0.70    | 0.18                       | 0.62    | 0.61    | 0.00000 | 0.00001 | 0.55  | -0.25                    | 0.65                  | 1.36  | 0.36  | 0.64  | -0.28    |         |                       |        |       |      |
| RPpos_466.3154_8.68    | RP      | pos        | 8.68            | 466.3154   | Glycocholic acid              | 412.2817 (100), 337.2526 (65), 319.2425 (25), 430.2986 (25), 76.0398 (20), 209.1321 (15), 227.1435 (15), 158.0812 (15), 213.1629 (10), 199.1478 (10)             | 1       | HMD80000138 | 0.03954 | 0.31968 | 0.38  | -0.09    | 0.80    | 0.44                       | 0.76    | 0.64    | 0.00000 | 0.00002 | 0.59  | -0.21                    | 0.76                  | 1.27  | 0.59  | 0.55  | -0.28    |         |                       |        |       |      |
| RPneg_476.27832_10.141 | RP      | neg        | 10.141          | 476.2783   | LPE 18:2                      | 279.2310 (100), 476.2725 (15), 214.0482 (5), 196.0376 (3), 78.9590 (3)                                                                                           | 1       | HMD80011507 | 0.44420 | 0.74025 | -0.19 | -0.22    | 0.38    | 0.23                       | -0.10   | -0.24   | 0.97383 | 0.99690 | -0.03 | -0.10                    | -0.13                 | 0.03  | 0.25  | 0.01  | -0.29    |         |                       |        |       |      |
| RPpos_478.2926_10.13   | RP      | pos        | 10.13           | 478.2926   | LPE 18:2                      | 337.2760 (100), 478.2896 (5)                                                                                                                                     | 1       | HMD80011507 | 0.48822 | 0.77009 | -0.18 | -0.14    | 0.37    | 0.23                       | -0.09   | -0.22   | 0.98947 | 0.99815 | -0.02 | -0.16                    | -0.01                 | -0.02 | 0.28  | 0.00  | -0.31    |         |                       |        |       |      |
| RPneg_478.29343_10.448 | RP      | neg        | 10.448          | 478.2934   | LPE 18:1                      | 281.2469 (100), 478.2916 (10), 214.0473 (5), 196.0376 (3), 78.9591 (3)                                                                                           | 1       | HMD80011506 | 0.39457 | 0.70441 | -0.27 | -0.16    | 0.05    | 0.00                       | -0.01   | -0.51   | 0.35338 | 0.83284 | 0.27  | 0.17                     | 0.15                  | 0.31  | 0.64  | 0.29  | -0.03    |         |                       |        |       |      |
| RPneg_500.27707_10.144 | RP      | neg        | 10.144          | 500.2771   | LPE 20:4                      | 303.2352 (100), 500.2753 (10), 214.0480 (10), 196.0388 (5)                                                                                                       | 1       | HMD80011517 | 0.85179 | 0.94441 | -0.04 | 0.01     | 0.43    | 0.34                       | 0.66    | 0.03    | 0.30993 | 0.80831 | 0.57  | 0.24                     | 0.28                  | 0.71  | 1.31  | 0.41  | -0.07    |         |                       |        |       |      |
| RPneg_514.28284_8.705  | RP      | neg        | 8.705           | 514.2828   | Taurocholic acid              | 514.2863 (100)                                                                                                                                                   | 1       | HMD80000036 | 0.05473 | 0.35632 | 0.73  | -0.07    | 2.05    | 0.63                       | 0.65    | 0.62    | 0.02734 | 0.34682 | 0.95  | -0.37                    | 1.24                  | 2.25  | 0.82  | 0.74  | -0.46    |         |                       |        |       |      |
| RPneg_524.27789_10.139 | RP      | neg        | 10.139          | 524.2779   | LPE 22:6                      | 327.2318 (100), 283.2436 (50), 214.0485 (20), 196.0376 (5), 524.2759 (5), 78.9590 (5)                                                                            | 1       | HMD80011526 | 0.14650 | 0.48793 | -0.35 | -0.25    | -0.06   | -0.49                      | 0.29    | -0.15   | 0.90590 | 0.98659 | 0.23  | 0.16                     | 0.14                  | 0.36  | 0.53  | 0.43  | -0.02    |         |                       |        |       |      |
| RPneg_564.33014_10.133 | RP      | neg        | 10.133          | 564.3301   | LPC 18:2 (M+HCOO-)            | 279.2309 (100), 504.3109 (20)                                                                                                                                    | 1       | HMD80010386 | 0.01549 | 0.23292 | -0.43 | -0.15    | -0.11   | -0.21                      | -0.19   | -0.69   | 0.49729 | 0.90072 | 0.11  | 0.09                     | 0.08                  | 0.12  | 0.26  | 0.13  | -0.18    |         |                       |        |       |      |
| RPneg_566.34509_10.442 | RP      | neg        | 10.442          | 566.3451   | LPC 18:1 (M+HCOO-)            | 281.2469 (100), 508.3258 (25)                                                                                                                                    | 1       | HMD80002815 | 0.00383 | 0.12650 | -0.44 | -0.18    | -0.20   | -0.31                      | -0.02   | -0.19   | 0.20688 | 0.72367 | 0.50  | 0.44                     | 0.41                  | 0.46  | 0.59  | 0.42  | -0.22    |         |                       |        |       |      |
| RPneg_568.36096_10.78  | RP      | neg        | 10.78           | 568.3610   | LPC 18:0 (M+HCOO-)            | 283.2619 (100), 508.3417 (20)                                                                                                                                    | 1       | HMD80010384 | 0.02021 | 0.25817 | -0.41 | 0.03     | -0.13   | -0.32                      | -0.21   | -0.46   | 0.27208 | 0.78288 | 0.01  | 0.03                     | -0.01                 | 0.05  | 0.15  | 0.00  | -0.20    |         |                       |        |       |      |
| RPneg_588.32928_10.128 | RP      | neg        | 10.128          | 588.3293   | LPC 20:4 (M+HCOO-)            | 303.2352 (100), 528.3077 (25)                                                                                                                                    | 1       | HMD80010395 | 0.03217 | 0.30003 | -0.32 | -0.04    | 0.33    | -0.36                      | -0.27   | -0.04   | 0.87205 | 0.98133 | 0.12  | 0.39                     | 0.19                  | 0.29  | 0.14  | -0.41 | 0.14     |         |                       |        |       |      |
| RPneg_612.93309_10.128 | RP      | neg        | 10.128          | 612.9331   | LPC 22:6 (M+HCOO-)            | 327.2311 (100), 532.3058 (45)                                                                                                                                    | 1       | HMD80010404 | 0.00715 | 0.16721 | -0.46 | -0.25    | -0.32   | -0.46                      | -0.06   | -0.50   | 0.33721 | 0.82417 | 0.06  | 0.17                     | 0.12                  | 0.04  | 0.12  | 0.14  | -0.20    |         |                       |        |       |      |
| HILICneg_128.0357_4.33 | HILIC   | neg        | 4.33            | 128.0357   | Pyroglutamic acid             | 128.0359 (100), 85.0299 (20), 84.0297 (5), 84.0457 (2)                                                                                                           | 2       | HMD80000267 | 0.84346 | 0.94136 | -0.02 | 0.14     | 0.42    | -0.07                      | 0.03    | -0.05   | 0.00543 | 0.20687 | 0.28  | 0.29                     | 0.25                  | 0.33  | 0.49  | 0.12  | -0.09    |         |                       |        |       |      |
| HILICneg_131.0718_0.87 | HILIC   | neg        | 0.87            | 129.0563   | 3-methyl-2-oxovaleric acid    | 129.0562 (100), 85.0299 (25), 101.0611 (5)                                                                                                                       | 2       | HMD80000491 | 0.38086 | 0.69511 | 0.22  | 0.56     | 1.30    | 0.47                       | 0.23    | -0.21   | 0.02030 | 0.30170 | 0.55  | 0.24                     | 0.33                  | 0.51  | 1.03  | 0.50  | -0.06    |         |                       |        |       |      |
| HILICneg_131.0718_0.69 | HILIC   | neg        | 0.69            | 131.0718   | 2-Ethyl-2-hydroxybutyric acid | 85.0664 (100), 131.0723 (80), 113.0617 (5)                                                                                                                       | 2       | HMD80001975 | 0.82674 | 0.93452 | 0.17  | 0.35     | 0.57    | 0.26                       | 0.26    | -0.27   | 0.02628 | 0.34210 | 1.00  | 0.59                     | 1.20                  | 1.13  | 0.92  | 0.55  | 0.33     |         |                       |        |       |      |
| RPneg_131.0719_2.397   | RP      | neg        | 2.397           | 131.0719   | 2-Hydroxyisocaproic acid      | 85.0661 (100), 131.0719 (80), 69.0359 (5)                                                                                                                        | 2       | HMD80000036 | 0.72250 | 0.88668 | 0.18  | 0.28     | 1.33    | 0.29                       | 0.32    | -0.44   | 0.00104 | 0.05870 | 0.74  | 0.20                     | 1.05                  | 0.66  | 0.83  | 0.65  | 0.13     |         |                       |        |       |      |
| HILICpos_131.118_3.24  | HILIC   | pos        | 3.24            | 131.1180   | N-Acetylputrescine            | 114.0914 (100), 73.0288 (40), 72.0816 (40), 131.1172 (35), 60.0813 (15)                                                                                          | 2       | HMD80002064 | 0.25477 | 0.59315 | -0.21 | -0.12    | -0.07   | -0.12                      | -0.07   | -0.06   | 0.48922 | 0.89833 | 0.20  | 0.22                     | 0.17                  | 0.15  | 0.27  | 0.23  | 0.12     |         |                       |        |       |      |
| RPpos_139.0389_7.14    | RP      | pos        | 7.14            | 139.0389   | 4-Hydroxybenzoic acid         | 95.0496 (100), 139.0385 (50), 121.0280 (40)                                                                                                                      | 2       | HMD80000500 | 0.73251 | 0.89138 | -0.11 | -0.30    | 0.93    | -0.07                      | -0.02   | 0.46    | 0.51376 | 0.90648 | -0.27 | -0.21                    | -0.16                 | -0.07 | 0.02  | -0.82 | -0.35    |         |                       |        |       |      |
| HILICpos_143.0818_5.04 | HILIC   | pos        | 5.04            | 143.0818   | Ectoine                       | 0.43663                                                                                                                                                          | 0.73493 | 0.28        | 0.32    | 0.94    | 0.28  | 0.28     | 0.28    | -0.22                      | 0.60089 | 0.92810 | 0.05    | -0.09   | 0.29  | 0.48                     | 0.18                  | -0.12 | -0.26 |       |          |         |                       |        |       |      |
| HILICneg_144.0671_0.77 | HILIC   | neg        | 0.77            | 144.0671   | 4-Acetamidobutanoic acid      | 102.0563 (100), 100.0768 (80), 115.9210 (75), 144.0670 (45), 58.0295 (35), 126.0568 (15), 146.1174 (100), 87.0443 (50), 60.0813 (30), 123.9639 (5)               | 2       | HMD80003681 | 0.27725 | 0.61167 | -0.22 | 0.01     | 0.06    | 0.04                       | 0.14    | -0.50   | 0.78333 | 0.96604 | 0.14  | 0.17                     | 0.35                  | 0.07  | 0.08  | 0.08  | 0.12     |         |                       |        |       |      |
| HILICpos_146.1174_3.11 | HILIC   | pos        | 3.11            | 146.1174   | Acetylcholine cation          | 95.0603 (100), 154.0970 (95), 136.0870 (40), 112.0872 (30)                                                                                                       | 2       | HMD80013253 | 0.66407 | 0.85933 | 0.10  | 0.19     | 0.14    | 0.05                       | 0.12    | 0.47    | 0.28264 | 0.79142 | 0.24  | 0.36                     | 0.33                  | 0.31  | 0.13  | 0.23  | 0.29     | 0.30    |                       |        |       |      |
| HILICpos_154.0974_1.93 | HILIC   | pos        | 1.93            | 154.0974   | N-Acetylhistamine             | 114.1272 (100), 160.1330 (10), 55.0549 (5), 97.1014 (5)                                                                                                          | 2       | HMD80000991 | 0.55945 | 0.80913 | -0.26 | -0.17    | -0.11   | -0.08                      | -0.20   | -0.37   | 0.56171 | 0.92015 | -0.22 | -0.23                    | -0.21                 | -0.11 | -0.24 | -0.24 | -0.26    |         |                       |        |       |      |
| RPpos_160.1332_4.23    | RP      | pos        | 4.23            | 160.1332   | DL-2-Aminoctanoic acid        | 84.0808 (100), 130.0866 (80), 161.1281 (50), 98.0967 (5), 116.1062 (5), 144.1021 (5), 143.1183 (2)                                                               | 2       | HMD80002038 | 0.99258 | 0.99765 | 0.14  | 0.24     | 0.20    | 0.14                       | 0.35    | -0.16   | 0.17974 | 0.69482 | 0.07  | 0.05                     | 0.06                  | 0.15  | 0.08  | 0.06  | 0.02     |         |                       |        |       |      |
| RPpos_163.0756_6.02    | RP      | pos        | 6.02            | 163.0756   | Methyl cinnamate              | 145.0641 (100), 117.0696 (50), 163.0396 (35)                                                                                                                     | 2       | HMD80038833 | 0.05382 | 0.35417 | -0.56 | -0.16    | -0.09   | -0.22                      | -0.78   | -0.56   | 0.82565 | 0.97395 | -0.16 | -0.23                    | -0.39                 | -0.25 | 0.08  | -0.18 | 0.22     |         |                       |        |       |      |
| HILICpos_166.0532_6.11 | HILIC   | pos        | 6.11            | 166.0532   | Methionine sulfoxide          | 74.0240 (100), 166.0536 (25), 75.0267 (25), 102.0548 (20), 56.0502 (20), 149.0266 (20), 170.0921 (100), 109.0761 (40), 96.0686 (20), 126.1027 (20), 153.0658 (5) | 2       | HMD80000479 | 0.89012 | 0.95991 | 0.10  | 0.18     | 0.39    | 0.19                       | 0.14    | -0.18   | 0.84385 | 0.97663 | 0.02  | 0.02                     | 0.05                  | 0.16  | 0.06  | -0.02 | -0.22    |         |                       |        |       |      |
| HILICneg_173.0096_3.21 | HILIC   | neg        | 3.21            | 173.0096   | Aconitic acid                 | 85.0299 (100), 154.9478 (25), 129.0200 (20), 111.0869 (10), 172.8298 (10)                                                                                        | 2       | HMD80000072 | 0.65370 | 0.85444 | 0.08  | 0.03     | 0.16    | 0.12                       | 0.17    | 0.08    | 0.36240 | 0.83662 | 0.05  | 0.58                     | 0.00                  | 0.12  | 0.01  | -0.44 | 0.49     |         |                       |        |       |      |
| HILICpos_176.1028_6.37 | HILIC   | pos        | 6.37            | 176.1028   | Citrulline                    | 159.0757 (100), 113.0706 (50), 70.0657 (25), 176.1030 (5)                                                                                                        | 2       | HMD80000904 | 0.07835 | 0.40084 | -0.39 | 0.06     | -0.11   | -0.25                      | -0.09   | -0.83   | 0.81359 | 0.97170 | -0.08 | 0.28                     | 0.15                  | 0.15  | -0.36 | -0.40 | -0.06    |         |                       |        |       |      |
| HILICpos_177.1024_0.54 | HILIC   | pos        | 0.54            | 177.1024   | Cotinine                      | 177.1027 (100), 80.0498 (10), 98.0601 (5), 146.0605 (2)                                                                                                          | 2       | HMD8001046  | 0.48633 | 0.76840 | 0.11  | 0.06     | 0.14    | 0.07                       | 0.12    | 0.62    | 0.56170 | 0.92015 | -0.17 | -0.16                    | -0.20                 | -0.18 | -0.16 | -0.15 | -0.25    |         |                       |        |       |      |
| RPpos_177.1025_1.31    | RP      | pos        | 1.31            | 177.1025   | Cotinine                      | 177.1025 (100), 149.0233 (30), 80.0498 (10), 98.0601 (5)                                                                                                         | 2       | HMD8001046  | 0.67381 | 0.86404 | 0.00  | 0.03     | 0.17    | -0.11                      | -0.05   | 0.43    | 0.49445 | 0.89939 | -0.10 | -0.17                    | -0.08                 | -0.09 | -0.10 | -0.10 | -0.10    |         |                       |        |       |      |
| RPneg_179.07187_7.14   | RP      | neg        | 7.14            | 179.0719   | Propylparaben                 | 179.0712 (100), 136.0172 (35), 137.0250 (30)                                                                                                                     | 2       | HMD80000017 | 0.49924 | 0.77600 | 0.46  | -0.01    | 1.08    | 0.62                       | 0.66    | -0.07   | 0.41362 | 0.86469 | 1.64  | 2.10                     | 2.15                  | 1.74  | 1.45  | 1.17  | 0.39     |         |                       |        |       |      |
| HILICneg_182.0459_0.85 | HILIC   | neg        | 0.85            | 182.0459   | 4-Pyridoxic acid              | 187.0058 (100), 187.0069 (80), 79.9577 (40)                                                                                                                      | 2       | HMD80011635 | 0.06354 | 0.37162 | 0.46  | 0.44     | 0.58    | 0.43                       | 0.51    | 0.76    | 0.12976 | 0.62318 | -0.61 | -0.60                    | -0.59                 | -0.61 | -0.58 | -0.55 | -0.48    |         |                       |        |       |      |
| HILICneg_187.007_0.48  | HILIC   | neg        | 0.48            | 187.0073   | p-Cresol sulfate              | 107.0504 (100), 187.0061 (90), 79.9574 (35)                                                                                                                      | 2       | HMD80011635 | 0.07423 | 0.39249 | 0.46  | 0.43     | 0.58    | 0.41                       | 0.47    | 0.85    | 0.19508 | 0.70942 | -0.54 | -0.53                    | -0.51                 | -0.55 | -0.54 | -0.50 | -0.40    |         |                       |        |       |      |
| RPneg_187.00734_3.731  | RP      | neg        | 3.731           | 187.0073   | p-Cresol sulfate              | 126.0910 (100), 84.0808 (35), 189.1220 (25), 143.1100 (5)                                                                                                        | 2       | HMD80000206 | 0.68597 | 0.87033 | 0.05  | 0.05     | 0.44    | 0.36                       | 0.14    | -0.50   | 0.23886 | 0.75656 | 0.14  | -0.02                    |                       |       |       |       |          |         |                       |        |       |      |

| Feature_ID             | Mode  | Ionization | Average.Rt.min. | Average.Mz | Metabolite                 | MSMS                                                                                                                                                                                                                         | ID_Level | HMDB_ID     | IV-Alcohol self-administration (IV-ASA) |         |       |                       |       |        |       |        |         |                            | IV-Alcohol clamp (IV-AC) |          |                       |         |       |       |       |         |        |  |
|------------------------|-------|------------|-----------------|------------|----------------------------|------------------------------------------------------------------------------------------------------------------------------------------------------------------------------------------------------------------------------|----------|-------------|-----------------------------------------|---------|-------|-----------------------|-------|--------|-------|--------|---------|----------------------------|--------------------------|----------|-----------------------|---------|-------|-------|-------|---------|--------|--|
|                        |       |            |                 |            |                            |                                                                                                                                                                                                                              |          |             | Area Under the Curve (AUC)              |         |       | IV-Ghrelin or Placebo |       |        |       |        |         | Area Under the Curve (AUC) |                          |          | IV-Ghrelin or Placebo |         |       |       |       |         |        |  |
|                        |       |            |                 |            |                            |                                                                                                                                                                                                                              |          |             | p                                       | q       | d     | Baseline              |       | IV-ASA |       | BrAc=0 | p       | q                          | d                        | Baseline |                       | Post-LD |       | IV-AC |       | Post-AC | BrAc=0 |  |
|                        |       |            |                 |            |                            |                                                                                                                                                                                                                              |          |             |                                         |         |       | d                     | d     | d      | d     |        |         |                            |                          | d        | d                     | d       | d     | d     | d     |         |        |  |
| RPpos_256.264_10.65    | RP    | pos        | 10.65           | 256.2640   | Palmitamide                | 256.2645 (100), 88.0762 (10), 102.0917 (5), 57.0704 (5), 71.0858 (3), 116.1068 (3)                                                                                                                                           | 2        | HMD8001273  | 0.35444                                 | 0.67393 | -0.34 | -0.01                 | 0.26  | 0.15   | -0.03 | -0.50  | 0.83292 | 0.97501                    | 0.10                     | 1.33     | -0.33                 | 0.20    | -0.48 | 0.50  | 0.43  |         |        |  |
| RPpos_260.1856_4.19    | RP    | pos        | 4.19            | 260.1856   | AC 6:0 (Hexanoylcarnitine) | 85.0285 (100), 260.1850 (75)                                                                                                                                                                                                 | 2        | HMD80000756 | 0.11500                                 | 0.45050 | 0.67  | 0.18                  | 0.77  | 0.81   | 1.33  | -0.03  | 0.67133 | 0.94572                    | 0.11                     | 0.31     | 0.22                  | 0.15    | -0.13 | 0.04  | 0.10  |         |        |  |
| RPpos_261.1443_3.34    | RP    | pos        | 3.34            | 261.1443   | gamma-Glutamylleucine      | 132.1029 (100), 86.0971 (95), 261.1312 (50), 84.0448 (30), 198.1119 (25), 244.1173 (20), 130.0497 (15)                                                                                                                       | 2        | HMD80011171 | 0.33951                                 | 0.66217 | 0.25  | 0.24                  | 0.82  | 0.36   | 0.28  | -0.25  | 0.08324 | 0.53745                    | 0.28                     | 0.10     | 0.33                  | 0.37    | 0.34  | 0.42  | -0.29 |         |        |  |
| HILUCneg_263.1033_1.99 | HILIC | neg        | 1.99            | 263.1033   | Phenylacetylglutamine      | 145.0628 (100), 127.0521 (15), 263.1033 (5)                                                                                                                                                                                  | 2        | HMD80006344 | 0.00349                                 | 0.12120 | 0.59  | 0.46                  | 0.70  | 0.58   | 0.63  | 1.00   | 0.72439 | 0.95590                    | 0.15                     | 0.00     | 0.05                  | 0.03    | 0.27  | 0.29  | 0.58  |         |        |  |
| RPneg_263.10382_3.575  | RP    | neg        | 3.575           | 263.1038   | Phenylacetylglutamine      | 145.0628 (100), 127.0517 (15), 263.1011 (5)                                                                                                                                                                                  | 2        | HMD80006344 | 0.00523                                 | 0.14280 | 0.66  | 0.50                  | 0.73  | 0.68   | 0.72  | 0.96   | 0.90182 | 0.98571                    | 0.15                     | 0.09     | -0.05                 | 0.09    | -0.04 | 0.21  | 0.14  | 0.53    |        |  |
| RPpos_265.118_3.58     | RP    | pos        | 3.58            | 265.1180   | Phenylacetylglutamine      | 130.0498 (100), 84.0449 (15), 136.0758 (15), 147.0770 (10), 91.0540 (10)                                                                                                                                                     | 2        | HMD80006344 | 0.00731                                 | 0.16815 | 0.58  | 0.42                  | 1.11  | 0.44   | 0.49  | 0.97   | 0.82702 | 0.97408                    | 0.11                     | -0.03    | -0.05                 | -0.10   | 0.61  | 0.23  | 0.29  |         |        |  |
| HILUCneg_265.1187_1.88 | HILIC | pos        | 1.88            | 265.1187   | Phenylacetylglutamine      | 130.0499 (100), 84.0443 (15), 91.0541 (15), 136.0760 (15), 147.0755 (13), 265.1195 (10), 248.0908 (5)                                                                                                                        | 2        | HMD80006344 | 0.00378                                 | 0.12593 | 0.60  | 0.46                  | 0.71  | 0.59   | 0.66  | 1.01   | 0.75548 | 0.96233                    | 0.13                     | 0.00     | 0.05                  | 0.03    | 0.23  | 0.25  | 0.53  |         |        |  |
| RPpos_268.1037_1.6     | RP    | pos        | 1.6             | 268.1037   | Adenosine                  | 136.0622 (100), 268.1045 (20)                                                                                                                                                                                                | 2        | HMD80000050 | 0.93864                                 | 0.97761 | -0.14 | 0.07                  | 0.02  | -0.11  | -0.28 | -0.32  | 0.04530 | 0.42695                    | -0.36                    | -0.28    | -0.18                 | -0.49   | -0.34 | -0.32 | -0.62 |         |        |  |
| RPpos_269.0881_1.69    | RP    | pos        | 1.69            | 269.0881   | Inosine                    | 137.0461 (100), 269.1110 (5)                                                                                                                                                                                                 | 2        | HMD80000195 | 0.02277                                 | 0.26770 | -0.42 | -0.17                 | -0.23 | -0.32  | -0.49 | 0.33   | 0.56324 | 0.92024                    | -0.36                    | -0.04    | 0.15                  | -0.62   | -0.60 | -0.47 | 0.28  |         |        |  |
| RPpos_269.2266_10.78   | RP    | pos        | 10.78           | 269.2266   | Retinol [M+H-H2O]+         | 269.2279 (100), 93.0698 (85), 95.0856 (75), 81.0703 (70), 107.0680 (45), 119.0850 (40), 121.1011 (35), 69.0704 (30), 213.1625 (30), 133.1017 (20), 157.1013 (20), 145.1005 (20), 199.1476 (20), 175.1490 (20), 189.1636 (20) | 2        | HMD80000305 | 0.61481                                 | 0.83583 | -0.05 | 0.40                  | 0.36  | 0.00   | 0.29  | -0.26  | 0.02725 | 0.34610                    | -0.55                    | -0.55    | -0.37                 | -0.56   | -0.33 | -0.59 | -0.61 |         |        |  |
| HILUCneg_274.1048_7.27 | HILIC | neg        | 7.27            | 274.1048   | Glutamylglutamine          | 128.0358 (100), 145.0626 (80), 238.0845 (30), 256.0930 (20), 274.1031 (15), 212.1044 (15)                                                                                                                                    | 2        | HMD80028817 | 0.30102                                 | 0.63037 | 0.19  | 0.24                  | 0.41  | 0.00   | 0.44  | 0.16   | 0.03525 | 0.38399                    | 0.31                     | 0.39     | 0.25                  | 0.23    | 0.35  | 0.26  | 0.16  |         |        |  |
| HILUCpos_276.1189_7.24 | HILIC | pos        | 7.24            | 276.1189   | N-gamma-Glutamylglutamine  | 130.0500 (100), 147.0755 (80), 84.0442 (30), 276.1182 (20), 193.9293 (20)                                                                                                                                                    | 2        | HMD80029147 | 0.43454                                 | 0.73297 | 0.15  | 0.23                  | 0.36  | -0.06  | 0.45  | 0.10   | 0.03073 | 0.36599                    | 0.30                     | 0.32     | 0.22                  | 0.24    | 0.39  | 0.24  | 0.13  |         |        |  |
| HILUCpos_276.1439_5.08 | HILIC | pos        | 5.08            | 276.1439   | Glutarylcarntine           | 276.1433 (100), 85.0285 (70), 217.0714 (30), 60.0814 (15), 115.0383 (15), 199.0597 (10), 144.1013 (5)                                                                                                                        | 2        | HMD80013130 | 0.21377                                 | 0.55625 | 0.21  | 0.26                  | 0.33  | 0.08   | 0.47  | 0.30   | 0.34822 | 0.83042                    | 0.05                     | 0.06     | 0.05                  | 0.08    | -0.02 | -0.03 | 0.27  |         |        |  |
| RPneg_277.2167_10.67   | RP    | neg        | 10.67           | 277.2167   | FA 18:3                    | 277.2148 (100)                                                                                                                                                                                                               | 2        | HMD80001388 | 0.00029                                 | 0.03203 | 1.62  | -0.14                 | 0.61  | 1.08   | 2.85  | 0.06   | 0.89308 | 0.98433                    | -0.07                    | -0.02    | 0.38                  | -0.21   | -0.16 | -0.16 | -0.09 |         |        |  |
| RPneg_279.2329_10.917  | RP    | neg        | 10.917          | 279.2329   | FA 18:2                    | 279.2310 (100)                                                                                                                                                                                                               | 2        | HMD80006673 | 0.00081                                 | 0.05743 | 1.52  | -0.10                 | 0.57  | 1.13   | 2.57  | -0.06  | 0.48437 | 0.89681                    | -0.20                    | -0.29    | 0.19                  | -0.35   | -0.20 | -0.29 | -0.11 |         |        |  |
| HILUCpos_282.1189_4.4  | HILIC | pos        | 4.4             | 282.1189   | 1-Methyladenosine          | 150.0766 (100), 282.1196 (20)                                                                                                                                                                                                | 2        | HMD80003331 | 0.12299                                 | 0.45868 | -0.30 | 0.03                  | 0.11  | 0.06   | 0.01  | -0.43  | 0.30959 | 0.80799                    | 0.36                     | 0.26     | 0.45                  | 0.16    | 0.44  | 0.39  | 0.06  |         |        |  |
| RPpos_284.0992_1.69    | RP    | pos        | 1.69            | 284.0992   | Guanosine                  | 152.0560 (100), 284.2937 (5)                                                                                                                                                                                                 | 2        | HMD80000133 | 0.04976                                 | 0.34613 | -0.44 | -0.20                 | -0.68 | -0.47  | 0.06  | 0.08   | 0.23812 | 0.75634                    | -0.36                    | -0.45    | 0.09                  | 0.96    | -0.47 | -0.79 | 0.15  |         |        |  |
| RPpos_286.1432_8.3     | RP    | pos        | 8.3             | 286.1432   | Piperine                   | 286.1442 (100), 201.0540 (90), 135.0440 (20), 112.0755 (5)                                                                                                                                                                   | 2        | HMD80029377 | 0.76385                                 | 0.90683 | -0.02 | 0.13                  | 0.23  | 0.11   | -0.06 | -0.50  | 0.03251 | 0.37156                    | 1.46                     | 1.40     | 1.45                  | 1.46    | 1.42  | 1.39  | 1.01  |         |        |  |
| HILUCpos_286.144_0.4   | HILIC | pos        | 0.4             | 286.1444   | Piperine                   | 286.1444 (100), 201.0542 (95), 135.0442 (20), 112.0755 (5)                                                                                                                                                                   | 2        | HMD80029377 | 0.78407                                 | 0.91532 | -0.02 | 0.14                  | 0.20  | 0.12   | -0.06 | -0.51  | 0.02977 | 0.35953                    | 1.53                     | 1.50     | 1.54                  | 1.49    | 1.50  | 1.47  | 1.07  |         |        |  |
| RPpos_286.2018_5.19    | RP    | pos        | 5.19            | 286.2018   | AC 8:1                     | 85.0284 (100), 286.1994 (80)                                                                                                                                                                                                 | 2        | HMD80000772 | 0.88164                                 | 0.95613 | -0.04 | 0.08                  | 0.10  | 0.12   | -0.07 | -0.09  | 0.71146 | 0.95302                    | 0.04                     | -0.07    | 0.10                  | 0.05    | 0.01  | -0.06 | 0.19  |         |        |  |
| RPneg_297.2804_11.7    | RP    | neg        | 11.7            | 297.2804   | FA 19:0                    | 297.2835 (100)                                                                                                                                                                                                               | 2        | HMD80000772 | 0.32125                                 | 0.64751 | -0.39 | -0.10                 | 0.02  | -0.29  | 0.32  | 0.63   | 0.73275 | 0.95811                    | 0.15                     | -0.79    | 0.48                  | -0.06   | -0.30 | 0.09  | 0.75  |         |        |  |
| RPneg_299.2594_10.211  | RP    | neg        | 10.211          | 299.2594   | 2-hydroxystearic acid      | 299.2576 (100), 253.2538 (5)                                                                                                                                                                                                 | 2        | HMD80062549 | 0.86435                                 | 0.94948 | 0.04  | 0.29                  | 0.30  | 1.11   | 3.80  | -0.02  | 0.00069 | 0.04500                    | 0.21                     | 0.57     | 0.59                  | 0.50    | 0.77  | 0.17  | 0.03  |         |        |  |
| RPneg_301.2168_10.64   | RP    | neg        | 10.64           | 301.2168   | FA 20:5                    | 301.2146 (100)                                                                                                                                                                                                               | 2        | HMD80001999 | 0.06860                                 | 0.38094 | 0.54  | 0.06                  | 0.15  | 0.13   | 1.88  | -0.24  | 0.62984 | 0.93531                    | -0.13                    | -0.18    | 0.26                  | -0.21   | -0.17 | -0.27 | -0.13 |         |        |  |
| RPneg_305.24884_11.071 | RP    | neg        | 11.071          | 305.2488   | FA 20:3                    | 305.2484 (100)                                                                                                                                                                                                               | 2        | HMD80002925 | 0.00905                                 | 0.18722 | 1.27  | 0.08                  | 0.29  | 0.90   | 2.92  | -0.07  | 0.48923 | 0.89833                    | -0.23                    | -0.33    | 0.00                  | -0.39   | -0.15 | -0.22 | -0.10 |         |        |  |
| RPneg_307.2642_11.32   | RP    | neg        | 11.32           | 307.2642   | FA 20:2                    | 307.2621 (100)                                                                                                                                                                                                               | 2        | HMD8001864  | 0.00199                                 | 0.08952 | 1.44  | 0.01                  | 0.43  | 1.08   | 3.27  | 0.19   | 0.78288 | 0.96604                    | -0.18                    | -0.26    | 0.01                  | -0.27   | -0.10 | -0.22 | 0.02  |         |        |  |
| RPneg_309.2798_11.624  | RP    | neg        | 11.624          | 309.2795   | FA 20:1                    | 309.2784 (100)                                                                                                                                                                                                               | 2        | HMD80002231 | 0.00140                                 | 0.07596 | 1.31  | 0.09                  | 0.22  | 0.73   | 4.50  | -0.03  | 0.75971 | 0.96233                    | 0.06                     | -0.28    | 0.33                  | -0.03   | 0.37  | -0.19 | 0.02  |         |        |  |
| RPneg_311.29575_12.053 | RP    | neg        | 12.053          | 311.2958   | FA 20:0                    | 311.1664 (100)                                                                                                                                                                                                               | 2        | HMD80002212 | 0.15903                                 | 0.50243 | -0.33 | 0.03                  | -0.03 | 0.10   | -0.27 | 0.01   | 0.93503 | 0.98984                    | 0.05                     | -0.16    | -0.31                 | -0.25   | 0.33  | 0.37  | 0.59  |         |        |  |
| RPpos_312.2166_5.66    | RP    | pos        | 5.66            | 312.2166   | AC 10:2                    | 85.0284 (100), 85.0285 (70)                                                                                                                                                                                                  | 2        | HMD80000651 | 0.20514                                 | 0.54921 | 0.08  | 0.00                  | 0.13  | 0.17   | 0.05  | -0.64  | 0.02680 | 0.34431                    | -0.32                    | -0.26    | -0.28                 | -0.28   | -0.35 | -0.35 | -0.39 |         |        |  |
| RPpos_313.1436_9.38    | RP    | pos        | 9.38            | 313.1436   | Benzyl butyl phthalate     | 91.0548 (100), 149.0234 (50), 120.0812 (100), 166.0859 (15), 313.1523 (10), 267.1492 (5)                                                                                                                                     | 2        | HMD80013302 | 0.27189                                 | 0.60791 | -0.41 | -0.25                 | 0.18  | -0.08  | 0.25  | 0.28   | 0.03476 | 0.38164                    | 0.14                     | 0.06     | 0.54                  | 0.73    | 0.32  | 0.31  | 0.15  |         |        |  |
| RPpos_313.155_4.72     | RP    | pos        | 4.72            | 313.1550   | Ph Phe                     | 267.1492 (5)                                                                                                                                                                                                                 | 2        | HMD80013302 | 0.64600                                 | 0.85038 | -0.19 | -0.34                 | -0.02 | -0.43  | 0.28  | 0.15   | 0.21685 | 0.73336                    | 0.64                     | 0.33     | 0.21                  | 0.67    | 0.29  | 1.18  | 0.83  |         |        |  |
| RPpos_314.2333_6.79    | RP    | pos        | 6.79            | 314.2333   | AC 10:1                    | 85.0284 (100), 314.2326 (80)                                                                                                                                                                                                 | 2        | HMD80000651 | 0.39223                                 | 0.70267 | 0.26  | 0.10                  | 0.56  | 0.25   | 0.47  | 0.00   | 0.36037 | 0.83520                    | 0.18                     | 0.35     | 0.23                  | 0.13    | -0.12 | 0.23  | 0.01  |         |        |  |
| RPpos_316.2479_7.26    | RP    | pos        | 7.26            | 316.2479   | AC 10:0                    | 85.0284 (100), 316.2498 (75)                                                                                                                                                                                                 | 2        | HMD80000651 | 0.17578                                 | 0.52103 | 0.62  | 0.36                  | 0.93  | 0.57   | 0.60  | -0.06  | 0.06649 | 0.45794                    | 0.85                     | 0.87     | 0.91                  | 0.79    | 0.20  | 0.77  | -0.05 |         |        |  |
| RPpos_328.2483_7.23    | RP    | pos        | 7.23            | 328.2483   | AC 11:1                    | 85.0290 (100), 328.2485 (80)                                                                                                                                                                                                 | 2        | HMD80000651 | 0.43562                                 | 0.73382 | -0.13 | -0.06                 | 0.26  | -0.12  | -0.29 | 0.00   | 0.11993 | 0.60679                    | 0.63                     | 0.21     | 0.41                  | 0.13    | 0.64  | 0.70  | -0.01 |         |        |  |
| RPneg_329.2484_10.992  | RP    | neg        | 10.992          | 329.2484   | FA 22:4                    | 329.2511 (100), 59.0106 (5), 287.2746 (5)                                                                                                                                                                                    | 2        | HMD80001976 | 0.00160                                 | 0.08127 | 1.48  | 0.10                  | 1.28  | 0.67   | 2.77  | 0.05   | 0.75052 | 0.96177                    | 0.11                     | -0.01    | 0.47                  | -0.09   | 0.16  | 0.10  | -0.10 |         |        |  |
| RPneg_331.26398_11.216 | RP    | neg        | 11.216          | 331.2640   | FA 22:4                    | 331.2668 (100)                                                                                                                                                                                                               | 2        | HMD80002226 | 0.00311                                 | 0.11456 | 1.31  | 0.14                  | 0.44  | 0.93   | 3.00  | 0.13   | 0.81367 | 0.97170                    | -0.12                    | -0.23    | 0.23                  | -0.34   | -0.06 | -0.06 | -0.06 |         |        |  |
| RPneg_338.09204_5.681  | RP    | neg        | 5.681           | 338.0920   | Topimarate                 | 338.0894 (100), 77.9659 (95), 95.9771 (20)                                                                                                                                                                                   | 2        | HMD80005034 | 0.67176                                 | 0.86336 | 0.02  | 0.07                  | 0.04  | 0.05   | 0.11  | -0.21  | 0.26550 | 0.77769                    | -0.35                    | -0.34    | -0.37                 | -0.35   | -0.31 | -0.38 | -0.34 |         |        |  |
|                        |       |            |                 |            |                            |                                                                                                                                                                                                                              |          |             |                                         |         |       |                       |       |        |       |        |         |                            |                          |          |                       |         |       |       |       |         |        |  |



| Feature_ID             | Mode | Ionization | Average.Rt.min. | Average.Mz | Metabolite         | MSMS                                                                      | ID_Level | HMDB_ID     | IV-Alcohol self-administration (IV-ASA) |         |       |          |       |       |                       |       |         |         |       | IV-Alcohol clamp (IV-AC)   |       |       |          |       |       |                       |   |   |   |   |
|------------------------|------|------------|-----------------|------------|--------------------|---------------------------------------------------------------------------|----------|-------------|-----------------------------------------|---------|-------|----------|-------|-------|-----------------------|-------|---------|---------|-------|----------------------------|-------|-------|----------|-------|-------|-----------------------|---|---|---|---|
|                        |      |            |                 |            |                    |                                                                           |          |             | Area Under the Curve (AUC)              |         |       | Baseline |       |       | IV-Ghrelin or Placebo |       |         |         |       | Area Under the Curve (AUC) |       |       | Baseline |       |       | IV-Ghrelin or Placebo |   |   |   |   |
|                        |      |            |                 |            |                    |                                                                           |          |             | p                                       | q       | d     | d        | d     | d     | d                     | d     | d       | d       | d     | p                          | q     | d     | d        | d     | d     | d                     | d | d | d | d |
| RPneg_464.31439_11.04  | RP   | neg        | 11.04           | 464.3144   | LPE 18:1e          | 464.3166 (100), 196.0390 (50), 78.9591 (45), 267.2676 (40), 140.0118 (35) | 2        |             | 0.01806                                 | 0.24514 | -0.44 | -0.04    | -0.40 | -0.37 | -0.25                 | -0.39 | 0.87557 | 0.98217 | 0.15  | 0.30                       | 0.21  | 0.19  | 0.13     | 0.15  | 0.15  | -0.15                 |   |   |   |   |
| RPpos_466.3299_11.02   | RP   | pos        | 11.02           | 466.3299   | LPE O-18:1         | 294.3137 (100), 466.3335 (50), 312.3284 (45), 448.3210 (25)               | 2        |             | 0.02624                                 | 0.28103 | -0.41 | -0.02    | -0.24 | -0.41 | -0.25                 | -0.39 | 0.66040 | 0.94253 | 0.10  | 0.21                       | 0.18  | 0.14  | 0.14     | 0.10  | 0.10  | -0.21                 |   |   |   |   |
| RPpos_468.3089_9.71    | RP   | pos        | 9.71            | 468.3089   | LPC 14:0           | 184.0738 (100), 86.0967 (10), 468.3088 (5), 104.1070 (3), 450.3005 (2)    | 2        | HMD80010379 | 0.18744                                 | 0.53394 | -0.31 | 0.00     | -0.07 | -0.21 | -0.16                 | -0.17 | 0.21571 | 0.73202 | -0.37 | -0.46                      | -0.47 | -0.53 | -0.38    | -0.40 | -0.40 |                       |   |   |   |   |
| RPneg_474.26279_9.972  | RP   | neg        | 9.972           | 474.2628   | LPE 18:3           | 277.2189 (100), 196.0388 (15), 474.2656 (10), 78.9590 (5), 214.0480 (4)   | 2        | HMD80011478 | 0.89549                                 | 0.96213 | -0.02 | -0.07    | 0.36  | 0.19  | 0.09                  | 0.26  | 0.53253 | 0.91290 | 0.32  | 0.25                       | 0.22  | 0.15  | 0.62     | 0.59  | 0.09  |                       |   |   |   |   |
| RPpos_476.2775_9.96    | RP   | pos        | 9.96            | 476.2775   | LPE 18:3           | 335.2579 (100), 62.0607 (40), 458.2631 (10), 476.2772 (5)                 | 2        | HMD80011508 | 0.97101                                 | 0.98899 | 0.01  | -0.06    | 0.36  | 0.23  | 0.10                  | 0.30  | 0.44718 | 0.88074 | 0.36  | 0.34                       | 0.51  | 0.36  | 0.62     | 0.36  | 0.05  |                       |   |   |   |   |
| RPpos_480.308_10.55    | RP   | pos        | 10.55           | 480.3080   | LPE 18:1           | 339.2887 (100), 462.3004 (10), 480.3085 (5)                               | 2        | HMD80011506 | 0.56231                                 | 0.81035 | -0.22 | -0.19    | 0.08  | 0.15  | -0.01                 | -0.32 | 0.66413 | 0.94310 | 0.13  | -0.13                      | 0.06  | 0.16  | 0.44     | 0.28  | -0.15 |                       |   |   |   |   |
| RPpos_480.3462_10.63   | RP   | pos        | 10.63           | 480.3462   | LPC O-16:1         | 104.1066 (100), 480.3408 (90), 86.0967 (45), 184.0738 (40), 124.9993 (25) | 2        |             | 0.02131                                 | 0.26291 | -0.42 | -0.03    | -0.16 | -0.31 | -0.26                 | -0.41 | 0.56642 | 0.91346 | 0.06  | 0.18                       | 0.12  | 0.01  | 0.25     | -0.06 | -0.09 |                       |   |   |   |   |
| RPpos_482.3237_10.86   | RP   | pos        | 10.86           | 482.3237   | LPE 18:0           | 341.3073 (100), 482.3241 (5)                                              | 2        | HMD80011130 | 0.07083                                 | 0.38535 | -0.37 | -0.06    | -0.13 | -0.24 | -0.12                 | -0.39 | 0.11180 | 0.59428 | -0.14 | -0.15                      | -0.09 | -0.13 | 0.02     | -0.10 | -0.55 |                       |   |   |   |   |
| RPpos_482.3245_10.17   | RP   | pos        | 10.17           | 482.3245   | LPC 15:0           | 184.0738 (100), 104.1075 (80), 482.3236 (35), 464.3154 (10)               | 2        | HMD80010381 | 0.01576                                 | 0.23335 | -0.53 | -0.13    | -0.21 | -0.52 | -0.39                 | -0.16 | 0.26683 | 0.77916 | -0.21 | -0.31                      | -0.07 | -0.18 | -0.20    | -0.23 | -0.23 |                       |   |   |   |   |
| RPpos_482.3597_10.71   | RP   | pos        | 10.71           | 482.3597   | LPC O-16:0         | 104.1065 (100), 482.3636 (30), 184.0737 (20), 86.0967 (10), 124.9992 (5)  | 2        |             | 0.14170                                 | 0.48138 | -0.38 | 0.11     | -0.08 | -0.26 | -0.21                 | -0.36 | 0.64835 | 0.93906 | 0.03  | 0.09                       | 0.09  | 0.04  | 0.08     | -0.02 | -0.11 |                       |   |   |   |   |
| RPpos_494.3253_9.9     | RP   | pos        | 9.9             | 494.3253   | LPC 16:1           | 184.0738 (100), 86.0969 (10), 494.3197 (5), 104.1070 (5), 476.3123 (3)    | 2        | HMD80010383 | 0.22940                                 | 0.57111 | -0.19 | 0.06     | 0.02  | -0.07 | -0.01                 | -0.22 | 0.62140 | 0.93338 | 0.18  | 0.16                       | 0.23  | 0.14  | 0.21     | 0.09  | 0.26  |                       |   |   |   |   |
| RPpos_496.3384_10.42   | RP   | pos        | 10.42           | 496.3384   | LPC 16:0           | 184.0738 (100), 104.1066 (80), 496.3378 (50), 478.3297 (10)               | 2        | HMD80010382 | 0.03435                                 | 0.30469 | -0.43 | 0.04     | 0.05  | -0.24 | -0.20                 | -0.40 | 0.10729 | 0.58531 | -0.15 | -0.13                      | 0.01  | -0.13 | -0.13    | -0.18 | -0.35 |                       |   |   |   |   |
| RPpos_496.341_10.3     | RP   | pos        | 10.3            | 496.3410   | LPC 16:0 isomer    | 184.0738 (100), 86.0969 (40), 496.3378 (5), 104.1070 (5), 478.3288 (2)    | 2        | HMD80240262 | 0.02071                                 | 0.26043 | -0.40 | 0.05     | -0.05 | -0.24 | -0.22                 | -0.38 | 0.15221 | 0.65794 | -0.10 | -0.13                      | -0.03 | -0.16 | 0.10     | -0.07 | -0.32 |                       |   |   |   |   |
| RPneg_498.26172_9.974  | RP   | neg        | 9.974           | 498.2617   | LPE 20:5           | 301.2164 (100), 196.0390 (40), 498.2632 (40), 78.9589 (20)                | 2        | HMD80011519 | 0.73788                                 | 0.89424 | -0.06 | 0.01     | 0.26  | -0.01 | 0.07                  | 0.02  | 0.84482 | 0.97697 | 0.08  | -0.01                      | 0.13  | 0.20  | 0.34     | 0.21  | -0.16 |                       |   |   |   |   |
| RPpos_500.2769_9.96    | RP   | pos        | 9.96            | 500.2769   | LPE 20:5           | 359.2596 (100), 62.0607 (80), 482.2630 (10), 500.2772 (10)                | 2        |             | 0.82040                                 | 0.93182 | -0.04 | 0.00     | 0.20  | 0.06  | 0.09                  | -0.01 | 0.85341 | 0.97801 | 0.07  | -0.05                      | 0.08  | 0.26  | 0.27     | 0.21  | -0.12 |                       |   |   |   |   |
| RPpos_502.2916_10.13   | RP   | pos        | 10.13           | 502.2916   | LPE 20:4           | 361.2709 (100)                                                            | 2        | HMD80011518 | 0.88587                                 | 0.95786 | -0.03 | 0.05     | 0.37  | 0.37  | 0.61                  | 0.06  | 0.19840 | 0.71412 | 0.64  | 0.21                       | 0.65  | 0.65  | 0.90     | 0.60  | -0.07 |                       |   |   |   |   |
| RPneg_502.2944_10.454  | RP   | neg        | 10.454          | 502.2944   | LPE 20:3           | 305.2488 (100), 502.2972 (20), 196.0392 (15), 78.9591 (5), 214.0486 (5)   | 2        | HMD80011515 | 0.21448                                 | 0.55699 | -0.33 | -0.29    | -0.02 | -0.01 | 0.00                  | 0.05  | 0.89290 | 0.98433 | 0.01  | -0.12                      | -0.05 | 0.20  | 0.35     | -0.02 | -0.34 |                       |   |   |   |   |
| RPpos_508.3394_10.31   | RP   | pos        | 10.31           | 508.3394   | LPC 17:1           | 184.0737 (100), 104.1075 (90), 508.3406 (35), 490.3295 (10)               | 2        |             | 0.14094                                 | 0.48076 | -0.29 | 0.09     | -0.14 | -0.27 | -0.06                 | -0.02 | 0.66016 | 0.94251 | 0.36  | 0.32                       | 0.18  | 0.39  | 0.58     | 0.40  | 0.26  |                       |   |   |   |   |
| RPpos_508.3774_10.81   | RP   | pos        | 10.81           | 508.3774   | LPC O-18:1         | 104.1066 (100), 508.3738 (25), 184.0737 (15), 86.0967 (10), 124.9992 (5)  | 2        |             | 0.03162                                 | 0.29806 | -0.50 | -0.06    | -0.12 | -0.42 | -0.32                 | -0.35 | 0.77340 | 0.96458 | 0.05  | 0.15                       | 0.13  | 0.02  | 0.18     | -0.07 | -0.11 |                       |   |   |   |   |
| RPneg_512.29816_9.721  | RP   | neg        | 9.721           | 512.29816  | LPC 14:0 (M+HCOO-) | 227.2021 (100), 452.2757 (25)                                             | 2        | HMD80010379 | 0.16931                                 | 0.51386 | -0.32 | -0.02    | -0.09 | -0.18 | -0.20                 | -0.17 | 0.21807 | 0.73504 | -0.36 | -0.43                      | -0.43 | -0.39 | -0.35    | -0.46 | -0.41 |                       |   |   |   |   |
| RPpos_520.3401_10.24   | RP   | pos        | 10.24           | 520.3401   | LPC 18:2           | 184.0738 (100), 104.1076 (80), 520.3348 (30), 502.3282 (10)               | 2        | HMD80010386 | 0.02339                                 | 0.27047 | -0.44 | -0.21    | -0.11 | -0.17 | -0.17                 | -0.55 | 0.60172 | 0.92848 | 0.08  | 0.11                       | 0.10  | 0.05  | 0.21     | 0.09  | -0.26 |                       |   |   |   |   |
| RPpos_522.3566_10.55   | RP   | pos        | 10.55           | 522.3566   | LPC 18:1           | 184.0737 (100), 104.1076 (85), 522.3556 (30), 504.3417 (10)               | 2        | HMD80002815 | 0.01107                                 | 0.20358 | -0.41 | -0.07    | -0.14 | -0.31 | -0.16                 | -0.40 | 0.64755 | 0.93902 | 0.16  | 0.22                       | 0.19  | 0.16  | 0.26     | 0.11  | -0.04 |                       |   |   |   |   |
| RPpos_524.3726_10.87   | RP   | pos        | 10.87           | 524.3726   | LPC 18:0           | 184.0737 (100), 104.1076 (80), 524.3660 (40), 506.3568 (10)               | 2        | HMD80010384 | 0.02538                                 | 0.27880 | -0.43 | 0.05     | -0.11 | -0.36 | -0.20                 | -0.46 | 0.40358 | 0.85894 | 0.03  | 0.12                       | 0.03  | 0.03  | 0.20     | -0.02 | -0.25 |                       |   |   |   |   |
| RPpos_526.2921_10.13   | RP   | pos        | 10.13           | 526.2921   | LPE 22:5           | 385.2740 (100), 526.2961 (5)                                              | 2        | HMD80011526 | 0.09953                                 | 0.43066 | -0.38 | -0.28    | -0.14 | -0.60 | 0.27                  | -0.18 | 0.82180 | 0.97318 | 0.27  | 0.15                       | 0.33  | 0.25  | 0.53     | 0.64  | -0.03 |                       |   |   |   |   |
| RPneg_526.29352_10.392 | RP   | neg        | 10.392          | 526.2935   | LPE 22:5           | 329.2512 (100), 422.42                                                    | 2        | HMD80011524 | 0.42242                                 | 0.72469 | -0.07 | -0.02    | 0.15  | -0.01 | 0.62                  | 0.25  | 0.51858 | 0.90847 | 0.28  | 0.20                       | 0.26  | 0.30  | 0.52     | 0.41  | 0.19  |                       |   |   |   |   |
| RPneg_526.31427_10.042 | RP   | neg        | 10.042          | 526.3143   | LPC 15:0 (M+HCOO-) | 78.9589 (15), 214.0480 (10)                                               | 2        | HMD80010381 | 0.00135                                 | 0.07456 | -0.86 | -0.38    | -0.55 | -0.37 | -0.92                 | -0.30 | 0.10326 | 0.57830 | -0.29 | -0.34                      | -0.38 | -0.23 | 0.06     | -0.52 | -0.32 |                       |   |   |   |   |
| RPpos_528.3091_10.38   | RP   | pos        | 10.38           | 528.3091   | LPE 22:5           | 241.2183 (100), 466.2955 (25)                                             | 2        | HMD80011524 | 0.47788                                 | 0.76273 | -0.05 | 0.01     | 0.17  | -0.01 | 0.62                  | 0.37  | 0.54857 | 0.93906 | 0.05  | 0.02                       | -0.04 | 0.04  | 0.14     | 0.25  | -0.13 |                       |   |   |   |   |
| RPneg_528.30988_10.626 | RP   | neg        | 10.626          | 528.3099   | LPE 22:4           | 387.2888 (100), 528.3041 (10)                                             | 2        | HMD80011523 | 0.63539                                 | 0.84558 | 0.01  | 0.04     | 0.13  | 0.20  | 0.46                  | 0.08  | 0.51052 | 0.90545 | 0.28  | 0.25                       | 0.26  | 0.30  | 0.49     | 0.37  | 0.14  |                       |   |   |   |   |
| RPneg_538.31311_10.059 | RP   | neg        | 10.059          | 538.3131   | LPC 16:1 (M+HCOO-) | 253.2162 (100), 478.2906 (45), 224.0702 (10)                              | 2        | HMD80010383 | 0.22488                                 | 0.56696 | -0.20 | 0.13     | 0.04  | -0.12 | -0.05                 | -0.21 | 0.63170 | 0.93546 | 0.17  | 0.17                       | 0.15  | 0.16  | 0.32     | 0.07  | 0.28  |                       |   |   |   |   |
| RPpos_542.3248_9.95    | RP   | pos        | 9.95            | 542.3248   | LPC 20:5           | 184.0737 (100), 104.1075 (90), 542.3209 (25), 524.3091 (5)                | 2        | HMD80010397 | 0.21454                                 | 0.55699 | -0.21 | -0.04    | -0.07 | -0.12 | -0.03                 | -0.28 | 0.93882 | 0.99074 | 0.01  | 0.05                       | 0.07  | 0.02  | 0.05     | 0.08  | -0.08 |                       |   |   |   |   |
| RPpos_544.341_10.12    | RP   | pos        | 10.12           | 544.3410   | LPC 20:4           | 184.0737 (100), 86.0967 (10), 544.3387 (5), 526.3298 (2), 104.1075 (2)    | 2        | HMD80010395 | 0.03081                                 | 0.29558 | -0.35 | -0.04    | -0.06 | -0.14 | 0.01                  | -0.62 | 0.74943 | 0.96150 | 0.21  | 0.17                       | 0.24  | 0.17  | 0.22     | 0.22  | -0.03 |                       |   |   |   |   |
| RPpos_548.371_10.69    | RP   | pos        | 10.69           | 548.3710   | LPC 20:2           | 184.0738 (100), 104.1070 (90), 548.3732 (30), 530.3624 (10)               | 2        | HMD80010392 | 0.02272                                 | 0.26757 | -0.42 | -0.14    | -0.18 | -0.25 | -0.16                 | -0.39 | 0.31952 | 0.81506 | -0.06 | 0.04                       | -0.03 | -0.04 | -0.01    | 0.00  | -0.26 |                       |   |   |   |   |
| RPpos_550.3865_10.95   | RP   | pos        | 10.95           | 550.3865   | LPC 20:1           | 184.0738 (100), 104.1070 (80), 550.3884 (30), 532.3730 (10)               | 2        | HMD80010391 | 0.01287                                 | 0.21626 | -0.46 | -0.15    | -0.18 | -0.41 | -0.30                 | -0.47 | 0.68682 | 0.94918 | 0.03  | 0.15                       | 0.04  | 0.06  | 0.15     | -0.07 | -0.14 |                       |   |   |   |   |
| RPneg_552.3302_10.531  | RP   | neg        | 10.531          | 552.3302   | LPC 17:1 (M+HCOO-) | 267.2342 (100), 492.3138 (50), 224.0708 (10)                              | 2        |             | 0.05424                                 | 0.35524 | -0.33 | -0.07    | -0.17 | -0.39 | -0.24                 | -0.09 | 0.40567 | 0.86018 | -0.29 | -0.32                      | -0.21 | -0.29 | -0.23    | -0.25 | -0.26 |                       |   |   |   |   |
| RPneg_554.3459_10.685  | RP   | neg        | 10.685          | 554.3459   | LPC 17:0 (M+HCOO-) | 269.2472 (100), 494.3198 (50), 224.0699 (15)                              | 2        | HMD80012108 | 0.01644                                 | 0.23740 | -0.56 | -0.10    | -0.33 | -0.50 | -0.40                 | -0.30 | 0.54857 | 0.93906 | 0.05  | 0.02                       | -0.04 | 0.04  | 0.14     | 0.25  | -0.13 |                       |   |   |   |   |
| RPneg_562.31384_9.841  | RP   | neg        | 9.841           | 562.3138   | LPC 18:3 (M+HCOO-) | 277.2176 (100), 502.2934 (20)                                             | 2        | HMD80010387 | 0.35667                                 |         |       |          |       |       |                       |       |         |         |       |                            |       |       |          |       |       |                       |   |   |   |   |



| Feature_ID             | Mode  | Ionization | Average_Rt.min. | Average_Mz | Metabolite | MSMS | ID_Level | HMDB_ID | IV-Alcohol self-administration (IV-ASA) |         |        |       |        |       |                       |       |         |         |       |       | IV-Alcohol clamp (IV-AC)   |       |        |       |          |       |                       |   |         |   |        |   |
|------------------------|-------|------------|-----------------|------------|------------|------|----------|---------|-----------------------------------------|---------|--------|-------|--------|-------|-----------------------|-------|---------|---------|-------|-------|----------------------------|-------|--------|-------|----------|-------|-----------------------|---|---------|---|--------|---|
|                        |       |            |                 |            |            |      |          |         | Area Under the Curve (AUC)              |         |        |       |        |       | IV-Ghrelin or Placebo |       |         |         |       |       | Area Under the Curve (AUC) |       |        |       |          |       | IV-Ghrelin or Placebo |   |         |   |        |   |
|                        |       |            |                 |            |            |      |          |         | Baseline                                |         | IV-ASA |       | BrAC=0 |       | Baseline              |       | Post-LD |         | IV-AC |       | Post-AC                    |       | BrAC=0 |       | Baseline |       | IV-AC                 |   | Post-AC |   | BrAC=0 |   |
|                        |       |            |                 |            |            |      |          |         | p                                       | q       | d      | d     | d      | d     | p                     | q     | d       | d       | d     | d     | p                          | q     | d      | d     | d        | p     | q                     | d | d       | d | p      | q |
| RPneg_123.04543_3.32   | RP    | neg        | 3.32            | 123.0454   |            |      | 4        |         | 0.02334                                 | 0.27043 | 1.34   | 1.07  | 2.13   | 1.15  | 1.53                  | 1.27  | 0.12095 | 0.60864 | -0.40 | -0.37 | -0.35                      | -0.32 | -0.43  | -0.42 | -0.42    | -0.44 |                       |   |         |   |        |   |
| RPpos_123.3098_5.7     | RP    | pos        | 5.7             | 123.3098   |            |      | 4        |         | 0.79785                                 | 0.92198 | -0.12  | 0.15  | 0.50   | -0.37 | -0.23                 | 0.43  | 0.87690 | 0.98220 | -0.06 | -0.06 | -0.10                      | -0.07 | -0.19  | 0.31  | 0.31     | -0.22 |                       |   |         |   |        |   |
| RPpos_123.5887_9.83    | RP    | pos        | 9.83            | 123.5887   |            |      | 4        |         | 0.02610                                 | 0.28087 | 0.39   | 0.56  | 0.56   | 0.26  | 0.50                  | 0.28  | 0.09035 | 0.55386 | 0.74  | -0.19 | 0.46                       | 0.87  | 1.01   | 1.56  | 1.39     |       |                       |   |         |   |        |   |
| RPpos_123.6123_5.7     | RP    | pos        | 5.7             | 123.6123   |            |      | 4        |         | 0.22544                                 | 0.56723 | -0.35  | -0.06 | 0.50   | -0.45 | -0.32                 | 0.25  | 0.00665 | 0.17265 | -0.34 | -0.29 | -0.06                      | -0.47 | -0.18  | 0.06  | -0.52    |       |                       |   |         |   |        |   |
| HILICneg_123.7263_1.5  | HILIC | neg        | 1.5             | 123.7263   |            |      | 4        |         | 0.00877                                 | 0.18355 | -0.63  | -0.29 | -0.31  | -0.68 | -0.58                 | -0.25 | 0.17144 | 0.68218 | -0.36 | 0.19  | 0.06                       | -0.05 | -0.58  | -0.88 | -0.45    |       |                       |   |         |   |        |   |
| RPpos_123.7581_10.43   | RP    | pos        | 10.43           | 123.7581   |            |      | 4        |         | 0.00238                                 | 0.26551 | 0.33   | 0.11  | 0.09   | -0.26 | -0.34                 | 0.24  | 0.02659 | 0.20551 | -0.15 | -0.25 | -0.12                      | -0.23 | -0.21  | -0.42 |          |       |                       |   |         |   |        |   |
| RPneg_123.90251_14.174 | RP    | neg        | 14.174          | 123.9025   |            |      | 4        |         | 0.24209                                 | 0.58274 | -0.31  | 0.25  | -0.18  | 0.42  | -0.29                 | -0.41 | 0.72814 | 0.95678 | -0.02 | -0.13 | 0.16                       | 0.07  | -0.03  | -0.52 | 0.56     |       |                       |   |         |   |        |   |
| HILICneg_123.9116_3.06 | HILIC | neg        | 3.06            | 123.9116   |            |      | 4        |         | 0.83566                                 | 0.93838 | -0.11  | -0.10 | 0.54   | 0.30  | 0.48                  | 1.25  | 0.67015 | 0.94545 | -0.08 | -0.16 | 0.23                       | -0.48 | 0.28   | -0.22 | -0.01    |       |                       |   |         |   |        |   |
| HILICneg_123.9117_0.58 | HILIC | neg        | 0.58            | 123.9117   |            |      | 4        |         | 0.17252                                 | 0.51807 | -0.51  | -0.13 | -0.02  | -0.20 | 0.00                  | 0.00  | 0.06347 | 0.48919 | 0.23  | 0.03  | -0.11                      | 0.34  | 0.60   | 0.33  | 0.27     |       |                       |   |         |   |        |   |
| HILICneg_124.0153_4.89 | HILIC | neg        | 4.89            | 124.0153   |            |      | 4        |         | 0.83089                                 | 0.93608 | 0.11   | 0.56  | 0.55   | 0.02  | 0.12                  | 0.34  | 0.78703 | 0.52501 | -0.25 | 0.08  | -0.53                      | 0.23  | -0.03  | -0.66 | -0.47    |       |                       |   |         |   |        |   |
| RPneg_124.04062_2.801  | RP    | neg        | 2.801           | 124.0406   |            |      | 4        |         | 0.98863                                 | 0.99589 | -0.15  | -0.06 | -0.06  | -0.16 | -0.10                 | 0.29  | 0.94571 | 0.99233 | -0.08 | -0.06 | -0.09                      | -0.13 | -0.08  | -0.15 | -0.05    |       |                       |   |         |   |        |   |
| HILICneg_124.0409_0.72 | HILIC | neg        | 0.72            | 124.0409   |            |      | 4        |         | 0.70932                                 | 0.88134 | -0.09  | 0.03  | -0.06  | -0.08 | -0.03                 | 0.31  | 0.96926 | 0.99673 | -0.08 | -0.02 | -0.04                      | -0.22 | -0.05  | -0.19 | -0.04    |       |                       |   |         |   |        |   |
| HILICpos_124.2017_0.56 | HILIC | pos        | 0.56            | 124.2017   |            |      | 4        |         | 0.56273                                 | 0.81054 | 0.19   | 0.35  | 0.55   | 0.58  | 0.02                  | -0.31 | 0.08454 | 0.54063 | 0.45  | -0.12 | 0.70                       | 0.90  | 0.39   | 0.14  | -0.27    |       |                       |   |         |   |        |   |
| HILICneg_124.8917_0.93 | HILIC | neg        | 0.93            | 124.8917   |            |      | 4        |         | 0.03285                                 | 0.30196 | -0.34  | -0.26 | -0.28  | -0.01 | -0.49                 | 0.02  | 0.01739 | 0.28119 | -0.40 | -0.25 | -0.45                      | -0.58 | 0.02   | -0.39 | -0.06    |       |                       |   |         |   |        |   |
| RPneg_124.89912_11.099 | RP    | neg        | 11.099          | 124.8991   |            |      | 4        |         | 0.75052                                 | 0.90067 | 0.13   | -0.06 | -0.01  | 0.61  | 1.63                  | 0.13  | 0.68938 | 0.94980 | -0.06 | -0.08 | -0.19                      | -0.22 | -0.08  | 0.02  | 0.44     |       |                       |   |         |   |        |   |
| HILICpos_124.9225_2.97 | HILIC | pos        | 2.97            | 124.9225   |            |      | 4        |         | 0.41856                                 | 0.72219 | -0.27  | 0.11  | 0.39   | -0.14 | -0.23                 | 1.28  | 0.75168 | 0.96189 | -0.11 | -0.21 | 0.08                       | 0.68  | 0.30   | -0.02 | -0.42    |       |                       |   |         |   |        |   |
| HILICneg_124.9844_0.92 | HILIC | neg        | 0.92            | 124.9844   |            |      | 4        |         | 0.09961                                 | 0.43066 | -0.28  | -0.25 | -0.28  | -0.24 | -0.18                 | -0.09 | 0.07485 | 0.51842 | -0.38 | -0.38 | -0.30                      | -0.44 | -0.36  | -0.36 | -0.21    |       |                       |   |         |   |        |   |
| HILICneg_124.9918_3.46 | HILIC | neg        | 3.46            | 124.9918   |            |      | 4        |         | 0.97714                                 | 0.99102 | -0.02  | 0.16  | 0.26   | 0.32  | 0.33                  | -0.55 | 0.32610 | 0.81879 | -0.18 | -0.33 | 0.02                       | -0.21 | -0.13  | -0.20 | -0.14    |       |                       |   |         |   |        |   |
| HILICneg_124.9919_0.76 | HILIC | neg        | 0.76            | 124.9919   |            |      | 4        |         | 0.69863                                 | 0.87557 | 0.04   | 0.07  | -0.01  | 0.03  | 0.16                  | 0.42  | 0.39181 | 0.85219 | -0.06 | 0.48  | 0.43                       | 0.58  | 0.43   | 0.07  | -0.07    |       |                       |   |         |   |        |   |
| HILICpos_124.9994_6.22 | HILIC | pos        | 6.22            | 124.9994   |            |      | 4        |         | 0.00035                                 | 0.03436 | -0.54  | -0.07 | -0.15  | -0.40 | -0.23                 | -0.39 | 0.84571 | 0.91584 | -0.08 | -0.11 | 0.26                       | 0.16  | 0.25   | 0.05  | -0.30    |       |                       |   |         |   |        |   |
| HILICneg_125.0249_0.54 | HILIC | neg        | 0.54            | 125.0249   |            |      | 4        |         | 0.94096                                 | 0.97835 | -0.05  | -0.05 | -0.10  | 0.17  | 0.35                  | -0.15 | 0.82549 | 0.97389 | -0.05 | -0.19 | -0.17                      | -0.10 | 0.34   | 0.40  | -0.37    |       |                       |   |         |   |        |   |
| HILICneg_125.036_6.17  | HILIC | neg        | 6.17            | 125.0360   |            |      | 4        |         | 0.90325                                 | 0.96429 | -0.01  | 0.09  | 0.47   | 0.13  | 0.11                  | -0.11 | 0.00564 | 0.15742 | 0.34  | 0.47  | 0.44                       | 0.59  | 0.44   | 0.11  | -0.04    |       |                       |   |         |   |        |   |
| RPpos_125.8015_7.36    | RP    | pos        | 7.36            | 125.8015   |            |      | 4        |         | 0.98014                                 | 0.99236 | -0.06  | 0.22  | 0.75   | -0.07 | -0.33                 | 0.74  | 0.25481 | 0.76996 | -0.36 | -0.25 | -0.02                      | -0.34 | -0.14  | -0.52 | -0.43    |       |                       |   |         |   |        |   |
| HILICneg_125.8734_0.39 | HILIC | neg        | 0.39            | 125.8734   |            |      | 4        |         | 0.03644                                 | 0.31135 | -0.68  | -0.63 | -0.34  | -0.12 | -0.38                 | -0.48 | 0.22669 | 0.74356 | 0.43  | 1.56  | -0.26                      | 0.52  | 0.08   | 0.17  | 0.71     |       |                       |   |         |   |        |   |
| HILICpos_125.9379_2.8  | HILIC | pos        | 2.8             | 125.9379   |            |      | 4        |         | 0.52165                                 | 0.78870 | -0.23  | 0.23  | 0.34   | -0.06 | -0.19                 | 0.99  | 0.72673 | 0.95623 | -0.09 | -0.01 | -0.18                      | 0.70  | 0.37   | 0.09  | -0.38    |       |                       |   |         |   |        |   |
| HILICneg_126.0036_5.41 | HILIC | neg        | 5.41            | 126.0036   |            |      | 4        |         | 0.51753                                 | 0.78685 | 0.19   | 0.39  | 0.52   | 0.10  | 0.40                  | 0.79  | 0.04320 | 0.41886 | 0.13  | -0.07 | 0.25                       | 0.18  | 0.31   | 0.25  | -0.48    |       |                       |   |         |   |        |   |
| RPpos_126.0551_2.81    | RP    | pos        | 2.81            | 126.0551   |            |      | 4        |         | 0.93325                                 | 0.97624 | -0.13  | 0.09  | 0.00   | -0.34 | 0.13                  | 0.05  | 0.71407 | 0.95354 | 0.00  | -0.01 | 0.11                       | 0.01  | 0.05   | 0.04  | -0.11    |       |                       |   |         |   |        |   |
| HILICpos_126.0659_1.14 | HILIC | pos        | 1.14            | 126.0659   |            |      | 4        |         | 0.23339                                 | 0.57485 | -0.28  | 0.01  | -0.46  | -0.32 | 0.09                  | -0.14 | 0.08186 | 0.53442 | -0.45 | -0.26 | -0.65                      | -0.37 | -0.35  | -0.42 | -0.08    |       |                       |   |         |   |        |   |
| HILICpos_126.0661_1.89 | HILIC | pos        | 1.89            | 126.0661   |            |      | 4        |         | 0.15501                                 | 0.49790 | -0.19  | 0.03  | 0.34   | 0.19  | 0.06                  | -0.42 | 0.01923 | 0.29353 | 0.74  | 0.85  | 1.12                       | 0.44  | 0.74   | 0.39  | 0.27     |       |                       |   |         |   |        |   |
| HILICpos_126.0663_1.62 | HILIC | pos        | 1.62            | 126.0663   |            |      | 4        |         | 0.49474                                 | 0.77346 | 0.15   | 0.78  | 0.54   | 0.33  | -0.07                 | -0.19 | 0.94431 | 0.99197 | 0.00  | -0.45 | -0.21                      | 0.23  | 0.20   | 0.17  | -0.39    |       |                       |   |         |   |        |   |
| HILICpos_126.1025_4.5  | HILIC | pos        | 4.5             | 126.1025   |            |      | 4        |         | 0.43033                                 | 0.73046 | -0.18  | 0.04  | -0.04  | -0.01 | -0.10                 | -0.21 | 0.85714 | 0.97904 | 0.04  | 0.15  | 0.24                       | -0.06 | -0.01  | 0.02  | 0.03     |       |                       |   |         |   |        |   |
| RPpos_126.1153_11.17   | RP    | pos        | 11.17           | 126.1153   |            |      | 4        |         | 0.00611                                 | 0.15278 | 1.13   | -0.21 | 0.57   | 1.24  | 1.86                  | -0.05 | 0.79963 | 0.96934 | -0.11 | -0.33 | 0.32                       | -0.45 | 0.02   | 0.02  | -0.09    |       |                       |   |         |   |        |   |
| HILICneg_126.9054_5.69 | HILIC | neg        | 5.69            | 126.9054   |            |      | 4        |         | 0.53908                                 | 0.79344 | -0.21  | 0.30  | 0.00   | 0.23  | 0.62                  | 0.22  | 0.52736 | 0.91094 | -0.21 | -0.79 | 0.25                       | -0.58 | -0.05  | -0.03 | -0.29    |       |                       |   |         |   |        |   |
| HILICneg_126.9054_1.41 | HILIC | neg        | 1.41            | 126.9054   |            |      | 4        |         | 0.11751                                 | 0.45311 | -0.45  | -0.45 | 0.22   | 0.01  | -0.25                 | -0.57 | 0.04381 | 0.42135 | 0.46  | 0.01  | 0.20                       | 0.80  | 0.47   | 0.69  | -0.68    |       |                       |   |         |   |        |   |
| HILICneg_126.9056_4.33 | HILIC | neg        | 4.33            | 126.9056   |            |      | 4        |         | 0.28891                                 | 0.62226 | -0.32  | -0.15 | -0.27  | 0.06  | -0.13                 | 0.04  | 0.36874 | 0.84006 | 0.11  | -0.87 | -0.31                      | 0.79  | -0.06  | 0.41  | 0.36     |       |                       |   |         |   |        |   |
| HILICneg_126.9056_0.96 | HILIC | neg        | 0.96            | 126.9056   |            |      | 4        |         | 0.82642                                 | 0.93436 | 0.09   | 0.36  | 0.82   | 0.42  | -0.20                 | 0.02  | 0.15551 | 0.66189 | 0.46  | -0.52 | 0.07                       | 0.80  | 0.39   | 0.41  | -0.71    |       |                       |   |         |   |        |   |
| HILICneg_126.9057_1.25 | HILIC | neg        | 1.25            | 126.9057   |            |      | 4        |         | 0.99040                                 | 0.99648 | -0.01  | 0.19  | 0.18   | 0.55  | 0.31                  | -0.16 | 0.35068 | 0.83165 | -0.18 | -0.37 | -0.14                      | 0.25  | -0.09  | -0.43 | -0.67    |       |                       |   |         |   |        |   |
| HILICneg_127.0311_1.25 | HILIC | neg        | 1.25            | 127.0311   |            |      | 4        |         | 0.01666                                 | 0.23842 | -0.43  | -0.10 | -0.17  | -0.10 | -0.29                 | -0.48 | 0.42624 | 0.87114 | 0.18  | 0.14  | 0.07                       | -0.03 | 0.21   | 0.48  | -0.02    |       |                       |   |         |   |        |   |
| HILICneg_127.0405_0.66 | HILIC | neg        | 0.66            | 127.0405   |            |      | 4        |         | 0.56158                                 | 0.80991 | 0.19   | 0.10  | 0.48   | 0.48  | 0.50                  | -0.05 | 0.32968 | 0.82035 | -0.16 | -0.18 | -0.03                      | -0.50 | -0.15  | 0.03  | 0.21     |       |                       |   |         |   |        |   |
| HILICneg_127.0519_6.17 | HILIC | neg        | 6.17            | 127.0519   |            |      | 4        |         | 0.85518                                 | 0.94569 | 0.00   | 0.08  | 0.46   | 0.12  | 0.14                  | -0.15 | 0.00107 | 0.05983 | 0.33  | 0.37  | 0.45                       | 0.60  | 0.37   | 0.25  | -0.16    |       |                       |   |         |   |        |   |
| RPpos_127.0755_10.5    | RP    | pos        | 10.5            | 127.0755   |            |      | 4        |         | 0.17501                                 | 0.52062 | -0.45  | -0.71 | 0.14   | 0.23  | -0.56                 | 0.41  | 0.30842 | 0.80758 | 0.38  | 0.48  | 0.50                       | 0.06  | -0.09  | 0.31  | 0.03     |       |                       |   |         |   |        |   |
| HILICneg_127.0768_0.96 | HILIC | neg        | 0.96            | 127.0768   |            |      | 4        |         | 0.61722                                 | 0.83727 | 0.14   | 0.51  | 0.15   | 0.23  | 0.68                  | 0.04  | 0.98503 | 0.99776 | 0.03  | 0.03  | 0.13                       | -0.20 | 0.18   | 0.05  | -0.06    |       |                       |   |         |   |        |   |
| HILICpos_127.0866_1.33 | HILIC | pos        | 1.33            | 127.0866   |            |      | 4        |         | 0.49409                                 | 0.77322 | -0.24  | 0.12  | -0.17  | -0.38 | -0.08                 | 0.54  | 0.75221 | 0.96194 | 0.01  | 0.30  | 0.35                       | 0.23  | -0.09  | -0.24 | 0.20     |       |                       |   |         |   |        |   |
| RPpos_127.1118_5.38    | RP    | pos        | 5.38            | 127.1118   |            |      | 4        |         | 0.539                                   |         |        |       |        |       |                       |       |         |         |       |       |                            |       |        |       |          |       |                       |   |         |   |        |   |





| Feature_ID             | Mode  | Ionization | Average_Rt.min. | Average_Mz | Metabolite                       | MSMS                                       | ID_Level | HMDB_ID | IV-Alcohol self-administration (IV-ASA) |         |       |       |       |                       |       |       |         |         | IV-Alcohol clamp (IV-AC)   |       |       |       |       |                       |       |   |   |   |
|------------------------|-------|------------|-----------------|------------|----------------------------------|--------------------------------------------|----------|---------|-----------------------------------------|---------|-------|-------|-------|-----------------------|-------|-------|---------|---------|----------------------------|-------|-------|-------|-------|-----------------------|-------|---|---|---|
|                        |       |            |                 |            |                                  |                                            |          |         | Area Under the Curve (AUC)              |         |       |       |       | IV-Ghrelin or Placebo |       |       |         |         | Area Under the Curve (AUC) |       |       |       |       | IV-Ghrelin or Placebo |       |   |   |   |
|                        |       |            |                 |            |                                  |                                            |          |         | p                                       | q       | d     | d     | d     | d                     | d     | d     | d       | d       | p                          | q     | d     | d     | d     | p                     | q     | d | d | d |
| HILICneg_135.0318_1.42 | HILIC | neg        | 1.42            | 135.0318   |                                  |                                            | 4        |         | 0.35685                                 | 0.67605 | -0.28 | -0.07 | 0.36  | -0.42                 | -0.14 | 0.50  | 0.33929 | 0.82526 | 0.56                       | -0.02 | 0.25  | 1.10  | 0.82  | 1.00                  | -0.33 |   |   |   |
| RPpos_135.0441_4.06    | RP    | pos        | 4.06            | 135.0441   |                                  |                                            | 4        |         | 0.13310                                 | 0.47140 | -0.49 | -0.28 | 0.09  | -0.18                 | -0.73 | -0.24 | 0.95730 | 0.99475 | -0.07                      | 0.04  | -0.11 | -0.22 | 0.07  | -0.10                 | 0.06  |   |   |   |
| RPpos_135.0807_7.16    | RP    | pos        | 7.16            | 135.0807   |                                  |                                            | 4        |         | 0.57976                                 | 0.81821 | -0.06 | 0.04  | 0.16  | 0.05                  | 0.17  | -0.07 | 0.55109 | 0.91748 | 0.03                       | 0.04  | 0.38  | -0.22 | 0.02  | 0.08                  | 0.40  |   |   |   |
| RPpos_135.1167_8.71    | RP    | pos        | 8.71            | 135.1167   |                                  |                                            | 4        |         | 0.26814                                 | 0.60409 | 0.38  | 0.36  | 0.15  | 0.39                  | 0.80  | 0.50  | 0.32261 | 0.81614 | 0.59                       | 0.38  | 0.59  | 0.76  | 0.47  | 0.39                  | 0.17  |   |   |   |
| RPpos_135.1167_8.81    | RP    | pos        | 8.81            | 135.1167   |                                  |                                            | 4        |         | 0.30797                                 | 0.63658 | 0.34  | 0.34  | 0.15  | 0.26                  | 0.76  | 0.61  | 0.30477 | 0.80366 | 0.61                       | 0.69  | 0.38  | 1.05  | 0.35  | 0.47                  | 0.09  |   |   |   |
| RPpos_135.8007_11.58   | RP    | pos        | 11.58           | 135.8007   |                                  |                                            | 4        |         | 0.79650                                 | 0.93130 | -0.08 | 0.21  | 0.13  | 0.04                  | -0.84 | 0.84  | 0.89493 | 0.98465 | 0.02                       | 0.56  | -0.05 | -0.48 | -0.07 | 0.05                  | 0.15  |   |   |   |
| HILICneg_135.9715_4.33 | HILIC | neg        | 4.33            | 135.9715   |                                  |                                            | 4        |         | 0.30395                                 | 0.63323 | -0.34 | -0.39 | -0.09 | -0.06                 | -0.01 | -0.04 | 0.13264 | 0.62911 | 0.61                       | 0.33  | 0.23  | 0.97  | 0.23  | 0.18                  | -0.27 |   |   |   |
| HILICneg_136.0478_5.57 | HILIC | pos        | 5.57            | 136.0478   |                                  |                                            | 4        |         | 0.13720                                 | 0.47733 | -0.33 | -0.06 | 0.06  | -0.20                 | -0.32 | -0.41 | 0.01322 | 0.24616 | -0.14                      | -0.17 | -0.03 | 0.04  | -0.12 | -0.26                 | -0.57 |   |   |   |
| HILICpos_136.0481_1.22 | HILIC | pos        | 1.22            | 136.0481   |                                  |                                            | 4        |         | 0.77146                                 | 0.91017 | 0.08  | 0.08  | 0.20  | 0.35                  | 0.26  | 0.71  | 0.67973 | 0.94744 | -0.13                      | -0.13 | -0.17 | -0.07 | -0.11 | -0.12                 | -0.09 |   |   |   |
| HILICpos_136.0616_1.12 | HILIC | pos        | 1.12            | 136.0616   |                                  |                                            | 4        |         | 0.68371                                 | 0.86925 | 0.06  | 0.31  | 0.66  | -0.16                 | 0.00  | 1.71  | 0.11864 | 0.60435 | 1.10                       | 0.23  | 0.41  | 2.61  | 0.66  | 0.81                  | 0.44  |   |   |   |
| HILICpos_136.0618_1.34 | HILIC | pos        | 1.34            | 136.0618   |                                  |                                            | 4        |         | 0.91432                                 | 0.96839 | -0.13 | 0.11  | 0.04  | -0.09                 | -0.30 | -0.41 | 0.04011 | 0.40805 | -0.37                      | -0.30 | -0.17 | -0.51 | -0.40 | -0.29                 | -0.63 |   |   |   |
| HILICpos_136.0757_5.1  | HILIC | pos        | 5.1             | 136.0757   |                                  |                                            | 4        |         | 0.13432                                 | 0.47340 | 0.53  | 0.11  | 1.40  | 0.68                  | 0.60  | 0.17  | 0.03135 | 0.36797 | 0.83                       | -0.09 | 1.16  | 1.09  | 1.46  | 0.25                  | 1.36  |   |   |   |
| RPpos_136.0759_1.21    | RP    | pos        | 1.21            | 136.0759   |                                  |                                            | 4        |         | 0.62874                                 | 0.84282 | 0.14  | 0.26  | 0.94  | 0.49                  | 0.05  | -0.54 | 0.13149 | 0.62657 | 0.34                       | -0.23 | 0.51  | 0.69  | 0.47  | 0.37                  | -0.30 |   |   |   |
| RPpos_136.5673_11.58   | RP    | pos        | 11.58           | 136.5673   |                                  |                                            | 4        |         | 0.82219                                 | 0.93246 | -0.07 | 0.24  | 0.14  | 0.07                  | 0.10  | -0.83 | 0.93208 | 0.98984 | 0.03                       | 0.57  | -0.06 | 0.17  | -0.38 | 0.08                  | 0.06  |   |   |   |
| HILICneg_136.8633_0.39 | HILIC | neg        | 0.39            | 136.8633   |                                  |                                            | 4        |         | 0.47428                                 | 0.76041 | -0.20 | 0.33  | 0.38  | 0.20                  | 0.71  | -0.18 | 0.01631 | 0.27330 | -0.67                      | -0.09 | -0.41 | -0.74 | -1.11 | -0.79                 | -1.72 |   |   |   |
| HILICneg_136.8634_0.62 | HILIC | neg        | 0.62            | 136.8634   |                                  |                                            | 4        |         | 0.55496                                 | 0.80669 | -0.23 | 0.36  | -0.11 | -0.04                 | -0.08 | -0.29 | 0.89153 | 0.98433 | 0.05                       | -0.27 | -0.07 | 0.66  | 0.34  | 0.01                  | 0.19  |   |   |   |
| HILICneg_136.8634_1.4  | HILIC | neg        | 1.4             | 136.8634   |                                  |                                            | 4        |         | 0.83885                                 | 0.93743 | 0.06  | 0.29  | 0.25  | 0.87                  | 1.31  | -0.43 | 0.09917 | 0.40353 | 0.29                       | -0.09 | 0.13  | 0.27  | 0.57  | 0.61                  | 0.64  |   |   |   |
| RPneg_136.8726_11.1    | RP    | neg        | 11.1            | 136.8727   |                                  |                                            | 4        |         | 0.66982                                 | 0.86228 | -0.15 | 0.14  | 0.23  | -0.32                 | 0.99  | 0.70  | 0.30277 | 0.80384 | -0.15                      | 0.17  | -0.23 | -0.14 | -0.23 | -0.26                 | 0.02  |   |   |   |
| RPneg_136.8750_13.793  | RP    | neg        | 13.793          | 136.8727   |                                  |                                            | 4        |         | 0.01638                                 | 0.23695 | -0.60 | -0.86 | -0.67 | -0.15                 | -0.12 | 0.19  | 0.01217 | 0.23564 | -0.65                      | -0.44 | -0.16 | -0.38 | -0.28 | -0.16                 | 0.26  |   |   |   |
| RPneg_136.8785_12.986  | RP    | neg        | 12.986          | 136.8729   |                                  |                                            | 4        |         | 0.64044                                 | 0.84786 | -0.14 | -0.25 | -0.10 | 0.47                  | 0.33  | 0.40  | 0.34547 | 0.82875 | 0.22                       | 0.18  | -0.16 | -0.05 | 0.46  | 0.41                  | -0.19 |   |   |   |
| RPneg_136.892_10.522   | RP    | neg        | 10.522          | 136.8920   |                                  |                                            | 4        |         | 0.07583                                 | 0.39583 | -0.66 | 0.02  | -0.50 | 0.26                  | -0.95 | -0.12 | 0.61149 | 0.93043 | 0.11                       | 0.11  | -0.40 | 0.34  | 0.48  | 0.39                  | 0.13  |   |   |   |
| RPneg_136.89201_11.603 | RP    | neg        | 11.603          | 136.8920   |                                  |                                            | 4        |         | 0.12406                                 | 0.45932 | -0.46 | -0.13 | -0.16 | -0.12                 | -0.23 | -0.37 | 0.32368 | 0.81702 | 0.24                       | 0.69  | -0.04 | 0.47  | 0.02  | 0.43                  | -0.58 |   |   |   |
| RPneg_136.99174_10.035 | RP    | neg        | 10.035          | 136.9917   |                                  |                                            | 4        |         | 0.83950                                 | 0.93950 | -0.06 | 0.47  | -0.26 | 0.43                  | -0.21 | -0.28 | 0.28038 | 0.78924 | -0.30                      | -0.04 | -0.14 | -0.06 | 0.32  | 0.32                  | -0.30 |   |   |   |
| HILICneg_137.0249_0.62 | HILIC | neg        | 0.62            | 137.0249   |                                  |                                            | 4        |         | 0.42887                                 | 0.72952 | 0.24  | 0.17  | 0.32  | 0.63                  | 0.19  | -0.17 | 0.52334 | 0.90917 | -0.25                      | -0.19 | -0.16 | -0.21 | -0.26 | -0.24                 | -0.37 |   |   |   |
| HILICneg_137.0362_0.71 | HILIC | neg        | 0.71            | 137.0362   |                                  |                                            | 4        |         | 0.32231                                 | 0.64843 | 0.36  | 0.42  | 0.86  | 0.02                  | 0.37  | 0.35  | 0.24269 | 0.75888 | 0.45                       | 0.21  | 1.19  | 0.25  | -0.21 | 0.37                  | 0.38  |   |   |   |
| HILICneg_137.0362_1.09 | HILIC | neg        | 1.09            | 137.0362   |                                  |                                            | 4        |         | 0.51395                                 | 0.78457 | -0.04 | 0.18  | 0.31  | 0.01                  | 0.02  | -0.36 | 0.30395 | 0.80438 | 0.22                       | 0.54  | 1.10  | -0.23 | 0.03  | -0.06                 | -0.14 |   |   |   |
| HILICpos_137.0457_2.47 | HILIC | pos        | 2.47            | 137.0457   |                                  |                                            | 4        |         | 0.03506                                 | 0.30715 | -0.42 | -0.20 | -0.23 | -0.30                 | -0.48 | 0.36  | 0.61906 | 0.93279 | -0.36                      | -0.05 | 0.17  | -0.63 | -0.60 | -0.51                 | 0.27  |   |   |   |
| RPpos_137.0458_1.69    | RP    | pos        | 1.69            | 137.0458   |                                  |                                            | 4        |         | 0.02608                                 | 0.28079 | -0.41 | -0.18 | -0.21 | -0.30                 | -0.48 | 0.34  | 0.56871 | 0.92109 | -0.38                      | -0.05 | 0.18  | -0.64 | -0.62 | -0.49                 | 0.29  |   |   |   |
| RPpos_137.479_10.9     | RP    | pos        | 10.9            | 137.4790   |                                  |                                            | 4        |         | 0.00432                                 | 0.13295 | 0.92  | -0.06 | 0.47  | 0.80                  | 1.84  | -0.11 | 0.59408 | 0.92734 | -0.21                      | -0.46 | 0.23  | -0.34 | -0.10 | -0.24                 | -0.14 |   |   |   |
| HILICneg_137.9873_4.21 | HILIC | neg        | 4.21            | 137.9873   |                                  |                                            | 4        |         | 0.18234                                 | 0.52835 | -0.21 | 0.04  | 0.61  | -0.07                 | -0.49 | -0.83 | 0.86341 | 0.97991 | -0.04                      | -0.10 | 0.09  | 0.26  | 0.15  | -0.51                 | -0.34 |   |   |   |
| RPpos_138.1372_11.29   | RP    | pos        | 11.29           | 138.1372   |                                  |                                            | 4        |         | 0.77984                                 | 0.91376 | 0.10  | 0.45  | 0.18  | 0.16                  | 0.10  | -0.63 | 0.40968 | 0.86259 | -0.08                      | 0.49  | -0.02 | 0.07  | -0.48 | -0.04                 | 0.00  |   |   |   |
| HILICneg_138.3532_4.89 | HILIC | neg        | 4.89            | 138.3532   |                                  |                                            | 4        |         | 0.44128                                 | 0.73821 | 0.23  | 0.74  | 0.55  | 0.04                  | 0.12  | 0.36  | 0.13624 | 0.63435 | -0.30                      | -0.01 | -0.43 | 0.00  | -0.07 | -0.67                 | -0.53 |   |   |   |
| RPneg_138.8578_11.602  | RP    | neg        | 11.602          | 138.8578   |                                  |                                            | 4        |         | 0.17937                                 | 0.52452 | -0.42 | -0.18 | -0.23 | -0.13                 | -0.43 | -0.61 | 0.71395 | 0.93354 | -0.03                      | 0.56  | -0.44 | -0.18 | -0.04 | -0.18                 | -0.41 |   |   |   |
| HILICneg_138.9409_0.52 | HILIC | neg        | 0.52            | 138.9409   |                                  |                                            | 4        |         | 0.01450                                 | 0.22765 | -0.17 | 0.00  | 0.09  | -0.04                 | -0.18 | -0.13 | 0.76836 | 0.96430 | -0.09                      | 0.07  | -0.18 | -0.06 | -0.11 | -0.20                 | 0.04  |   |   |   |
| HILICneg_139.0074_0.64 | HILIC | neg        | 0.64            | 139.0074   |                                  |                                            | 4        |         | 0.33263                                 | 0.65636 | 0.58  | 0.31  | 0.66  | 0.70                  | 0.70  | 0.59  | 0.44767 | 0.88090 | 0.92                       | -0.08 | 0.84  | 0.85  | 0.99  | 0.62                  | 0.43  |   |   |   |
| HILICneg_139.0265_4.91 | HILIC | neg        | 4.91            | 139.0265   |                                  |                                            | 4        |         | 0.98873                                 | 0.99589 | 0.04  | 0.59  | 0.46  | 0.03                  | 0.26  | 0.18  | 0.38158 | 0.84804 | -0.16                      | 0.09  | -0.32 | 0.12  | 0.40  | -0.68                 | -0.38 |   |   |   |
| HILICpos_139.0503_0.7  | HILIC | pos        | 0.7             | 139.0503   |                                  |                                            | 4        |         | 0.40666                                 | 0.71296 | 0.28  | 0.46  | 0.65  | 0.05                  | 0.30  | 0.33  | 0.23892 | 0.75656 | 0.36                       | 0.26  | 0.91  | 0.15  | -0.23 | 0.18                  | 0.53  |   |   |   |
| HILICneg_139.1566_4.89 | HILIC | neg        | 4.89            | 139.1566   |                                  |                                            | 4        |         | 0.49462                                 | 0.77346 | 0.19  | 0.55  | 0.54  | 0.06                  | 0.23  | 0.26  | 0.02688 | 0.34456 | -0.34                      | 0.00  | -0.58 | -0.02 | 0.03  | -0.69                 | -0.57 |   |   |   |
| RPpos_139.7545_11.52   | RP    | pos        | 11.52           | 139.7545   |                                  |                                            | 4        |         | 0.73063                                 | 0.89053 | 0.11  | 0.01  | -0.03 | 0.30                  | 0.45  | -0.55 | 0.53658 | 0.91415 | 0.52                       | 2.65  | 0.01  | 0.23  | -0.43 | 0.52                  | 0.30  |   |   |   |
| RPpos_139.9531_15.47   | RP    | pos        | 15.47           | 139.9531   |                                  |                                            | 4        |         | 0.03549                                 | 0.30874 | -0.68 | 0.30  | -0.43 | -0.22                 | -0.09 | 0.14  | 0.92757 | 0.98938 | 0.01                       | -0.28 | -0.34 | 0.31  | 0.08  | 0.49                  | 0.17  |   |   |   |
| HILICneg_139.9849_2.88 | HILIC | neg        | 2.88            | 139.9849   |                                  |                                            | 4        |         | 0.91383                                 | 0.96820 | -0.04 | -0.24 | 0.69  | -0.13                 | 0.06  | 0.31  | 0.17879 | 0.69392 | 0.40                       | 0.05  | 1.08  | 0.66  | 0.43  | 0.30                  | -0.41 |   |   |   |
| HILICpos_139.9879_0.94 | HILIC | pos        | 0.94            | 139.9879   |                                  |                                            | 4        |         | 0.98994                                 | 0.99629 | -0.03 | 0.24  | 0.27  | 0.12                  | 0.39  | -0.31 | 0.18526 | 0.70081 | -0.23                      | -0.26 | -0.31 | -0.10 | -0.25 | -0.30                 | -0.19 |   |   |   |
| HILICpos_140.0429_5.71 | HILIC | pos        | 5.71            | 140.0429   |                                  |                                            | 4        |         | 0.05711                                 | 0.36033 | -0.19 | 0.10  | 0.05  | 0.02                  | -0.22 | -0.13 | 0.17559 | 0.69019 | -0.19                      | -0.12 | -0.10 | -0.24 | -0.20 | -0.26                 | 0.22  |   |   |   |
| HILICpos_140.0681_3.6  | HILIC | pos        | 3.6             | 140.0681   | Likely adduct of glycine betaine | 140.0676 (100), 74.0966 (45), 114.0892 (5) | 4        |         | 0.29813                                 | 0.62834 | -0.23 | 0.00  | 0.07  | 0.03                  | -0.05 | -0.64 | 0.00000 |         |                            |       |       |       |       |                       |       |   |   |   |





| Feature_ID             | Mode  | Ionization | Average_Rt.min. | Average_Mz | Metabolite | MSMS | ID_Level | HMDB_ID | IV-Alcohol self-administration (IV-ASA) |       |       |        |       |       |                       |         |         |         |       |       | IV-Alcohol clamp (IV-AC)   |       |       |         |   |   |                       |   |   |         |   |   |
|------------------------|-------|------------|-----------------|------------|------------|------|----------|---------|-----------------------------------------|-------|-------|--------|-------|-------|-----------------------|---------|---------|---------|-------|-------|----------------------------|-------|-------|---------|---|---|-----------------------|---|---|---------|---|---|
|                        |       |            |                 |            |            |      |          |         | Area Under the Curve (AUC)              |       |       |        |       |       | IV-Ghrelin or Placebo |         |         |         |       |       | Area Under the Curve (AUC) |       |       |         |   |   | IV-Ghrelin or Placebo |   |   |         |   |   |
|                        |       |            |                 |            |            |      |          |         | Baseline                                |       |       | IV-ASA |       |       | Ghrelin               |         |         | Placebo |       |       | Baseline                   |       |       | Post-LD |   |   | Ghrelin               |   |   | Placebo |   |   |
|                        |       |            |                 |            |            |      |          |         | p                                       | q     | d     | d      | d     | d     | d                     | d       | d       | d       | d     | d     | p                          | q     | d     | d       | d | d | d                     | d | d | d       | d | d |
| HILICneg_148.9044_1.47 | HILIC | neg        | 1.47            | 148.9044   |            | 4    |          | 0.34286 | 0.66453                                 | -0.21 | 0.22  | 0.02   | 0.13  | -0.09 | -0.28                 | 0.21621 | 0.73241 | 0.26    | 0.77  | 0.03  | 0.53                       | -0.10 | 0.20  | 0.17    |   |   |                       |   |   |         |   |   |
| RPpos_149.0121_10.28   | RP    | pos        | 10.28           | 149.0121   |            | 4    |          | 0.62937 | 0.84321                                 | -0.17 | -0.31 | 0.22   | 1.88  | -0.19 | -0.47                 | 0.63073 | 0.93545 | 0.06    | 0.08  | 0.48  | 0.05                       | -0.26 | 0.09  | 0.26    |   |   |                       |   |   |         |   |   |
| HILICneg_149.0459_5.97 | HILIC | neg        | 5.97            | 149.0459   |            | 4    |          | 0.29673 | 0.62767                                 | -0.20 | -0.18 | 0.08   | -0.11 | -0.08 | -0.17                 | 0.11696 | 0.60178 | 0.27    | -0.01 | 0.13  | 0.44                       | 0.61  | 0.07  | -0.05   |   |   |                       |   |   |         |   |   |
| HILICneg_149.046_7.12  | HILIC | neg        | 7.12            | 149.0460   |            | 4    |          | 0.31459 | 0.64207                                 | -0.15 | 0.15  | 0.29   | -0.09 | -0.15 | -0.33                 | 0.10464 | 0.58059 | 0.32    | 0.44  | 0.38  | 0.70                       | 0.21  | -0.07 | 0.01    |   |   |                       |   |   |         |   |   |
| HILICneg_149.0463_3.8  | HILIC | neg        | 3.8             | 149.0461   |            | 4    |          | 0.27266 | 0.62893                                 | -0.29 | -0.01 | 0.10   | 0.12  | 0.10  | -0.14                 | 0.38281 | 0.79149 | 0.17    | 0.13  | -0.08 | -0.31                      | -0.10 | -0.26 | 0.12    |   |   |                       |   |   |         |   |   |
| HILICpos_149.0591_7.87 | HILIC | pos        | 7.87            | 149.0591   |            | 4    |          | 0.67295 | 0.86385                                 | -0.13 | 0.3   | -0.93  | 1.8   | -0.09 | -0.55                 | 0.00029 | 0.02514 | -0.17   | 0.80  | 1.97  | 2.32                       | 1.45  | -0.12 | 0.13    |   |   |                       |   |   |         |   |   |
| RPneg_149.09718_6.594  | RP    | neg        | 6.594           | 149.0972   |            | 4    |          | 0.21870 | 0.56080                                 | -0.24 | -0.23 | -0.22  | -0.02 | -0.20 | 0.03                  | 0.22796 | 0.74498 | -0.27   | -0.27 | -0.23 | -0.26                      | -0.23 | -0.25 | -0.17   |   |   |                       |   |   |         |   |   |
| HILICpos_149.1075_1.9  | HILIC | pos        | 1.9             | 149.1075   |            | 4    |          | 0.88811 | 0.95913                                 | -0.04 | -0.01 | -0.04  | -0.07 | 0.00  | 0.33                  | 0.12669 | 0.61769 | -0.29   | -0.37 | -0.27 | -0.30                      | -0.29 | -0.23 | -0.41   |   |   |                       |   |   |         |   |   |
| HILICneg_149.6677_1.49 | HILIC | neg        | 1.49            | 149.6677   |            | 4    |          | 0.01806 | 0.24514                                 | -0.56 | -0.22 | -0.39  | -0.72 | -0.41 | -0.16                 | 0.00000 | 0.00003 | -0.76   | -0.43 | -0.48 | -0.97                      | -0.78 | -0.90 | -0.50   |   |   |                       |   |   |         |   |   |
| HILICneg_149.9135_0.92 | HILIC | neg        | 0.92            | 149.9135   |            | 4    |          | 0.14701 | 0.48858                                 | -0.29 | -0.35 | -0.28  | -0.14 | -0.37 | -0.11                 | 0.14226 | 0.64473 | -0.33   | -0.39 | -0.22 | -0.34                      | -0.33 | -0.38 | -0.17   |   |   |                       |   |   |         |   |   |
| HILICpos_150.0383_5.17 | HILIC | pos        | 5.17            | 150.0383   |            | 4    |          | 0.21500 | 0.55763                                 | 0.29  | 0.05  | 1.16   | 0.39  | 0.33  | -0.55                 | 0.00122 | 0.06451 | 1.30    | 1.09  | 1.99  | 1.73                       | 1.70  | 0.63  | 0.37    |   |   |                       |   |   |         |   |   |
| RPneg_150.05632_4.699  | RP    | neg        | 4.699           | 150.0563   |            | 4    |          | 0.93945 | 0.97791                                 | 0.27  | 0.57  | 0.21   | 0.36  | 0.67  | -0.21                 | 0.51673 | 0.90770 | 0.28    | 0.20  | 0.52  | 0.22                       | 0.19  | 0.15  | 0.24    |   |   |                       |   |   |         |   |   |
| HILICpos_150.0584_0.84 | HILIC | pos        | 0.84            | 150.0584   |            | 4    |          | 0.74968 | 0.90015                                 | 0.06  | 0.27  | 0.19   | 0.19  | 0.30  | -0.10                 | 0.52009 | 0.90883 | -0.06   | -0.03 | -0.04 | -0.10                      | -0.06 | -0.11 | -0.02   |   |   |                       |   |   |         |   |   |
| HILICpos_150.0763_6.25 | HILIC | pos        | 6.25            | 150.0763   |            | 4    |          | 0.92055 | 0.97114                                 | -0.02 | 0.21  | 0.39   | 0.03  | -0.02 | -0.28                 | 0.55863 | 0.91988 | 0.02    | -0.06 | 0.12  | 0.19                       | 0.04  | -0.06 | -0.25   |   |   |                       |   |   |         |   |   |
| HILICpos_150.077_4.4   | HILIC | pos        | 4.4             | 150.0770   |            | 4    |          | 0.16298 | 0.50777                                 | -0.27 | -0.01 | 0.04   | 0.13  | 0.02  | -0.32                 | 0.27904 | 0.78839 | 0.44    | 0.29  | 0.57  | 0.24                       | 0.37  | 0.51  | -0.01   |   |   |                       |   |   |         |   |   |
| HILICpos_150.0776_1.96 | HILIC | pos        | 1.96            | 150.0776   |            | 4    |          | 0.16024 | 0.50373                                 | -0.35 | 0.10  | 0.01   | -0.04 | -0.63 | -0.28                 | 0.18823 | 0.70327 | 0.33    | 0.49  | 0.31  | 0.52                       | 0.42  | 0.44  | 0.15    |   |   |                       |   |   |         |   |   |
| HILICpos_150.1123_2.7  | HILIC | pos        | 2.7             | 150.1123   |            | 4    |          | 0.90002 | 0.96330                                 | -0.04 | -0.08 | -0.06  | -0.17 | 1.03  | 0.92                  | 0.41604 | 0.86590 | 0.73    | 0.75  | -0.15 | 0.51                       | 0.25  | 1.62  | 0.26    |   |   |                       |   |   |         |   |   |
| RPneg_150.88977_10.523 | RP    | neg        | 10.523          | 150.8898   |            | 4    |          | 0.45146 | 0.74484                                 | -0.10 | 0.18  | 0.03   | -0.13 | 0.26  | 0.50                  | 0.93985 | 0.99109 | -0.04   | 0.13  | 0.05  | 0.02                       | -0.24 | -0.13 | 0.09    |   |   |                       |   |   |         |   |   |
| HILICneg_151.0075_0.89 | HILIC | neg        | 0.89            | 151.0075   |            | 4    |          | 0.21766 | 0.55952                                 | -0.22 | -0.14 | -0.05  | -0.18 | -0.22 | -0.48                 | 0.01386 | 0.25100 | 0.53    | 0.66  | 0.68  | 0.42                       | 0.61  | 0.42  | 0.14    |   |   |                       |   |   |         |   |   |
| RPneg_151.02646_1.121  | RP    | neg        | 1.121           | 151.0265   |            | 4    |          | 0.22156 | 0.56397                                 | -0.30 | 0.01  | 0.07   | -0.43 | -0.23 | -0.14                 | 0.90951 | 0.98698 | -0.11   | 0.46  | 0.06  | 0.47                       | -0.17 | 0.06  | -0.27   |   |   |                       |   |   |         |   |   |
| RPneg_151.04028_4.896  | RP    | neg        | 4.896           | 151.0403   |            | 4    |          | 0.24675 | 0.58731                                 | -0.28 | -0.27 | -0.27  | -0.24 | 0.06  | 0.32                  | 0.10018 | 0.57198 | -0.17   | -0.23 | -0.26 | -0.32                      | -0.23 | -0.26 | -0.20   |   |   |                       |   |   |         |   |   |
| RPneg_151.04028_5.278  | RP    | neg        | 5.278           | 151.0403   |            | 4    |          | 0.00572 | 0.14775                                 | -0.37 | -0.09 | -0.14  | -0.16 | -0.39 | -0.32                 | 0.41792 | 0.86669 | 1.41    | 2.00  | 2.59  | 0.95                       | 0.41  | 0.38  | 0.18    |   |   |                       |   |   |         |   |   |
| RPneg_151.04045_3.808  | RP    | neg        | 3.808           | 151.0405   |            | 4    |          | 0.59793 | 0.82775                                 | 0.31  | 0.22  | 0.72   | 0.52  | 0.43  | -0.17                 | 0.67343 | 0.94628 | 0.03    | 0.16  | 0.37  | 0.48                       | 0.41  | 0.40  | -0.28   |   |   |                       |   |   |         |   |   |
| HILICneg_151.0405_0.57 | HILIC | neg        | 0.57            | 151.0405   |            | 4    |          | 0.42585 | 0.72734                                 | 0.07  | 0.23  | 0.41   | 0.31  | 0.25  | -0.36                 | 0.13599 | 0.63435 | 1.12    | 0.82  | 0.59  | 0.77                       | 1.18  | 0.60  | 0.10    |   |   |                       |   |   |         |   |   |
| HILICneg_151.0405_0.46 | HILIC | neg        | 0.46            | 151.0405   |            | 4    |          | 0.72114 | 0.88628                                 | 0.18  | 0.48  | 0.33   | 0.36  | 0.16  | -0.32                 | 0.92161 | 0.98872 | 0.19    | 0.73  | 0.24  | 0.17                       | 0.65  | 0.21  | -0.26   |   |   |                       |   |   |         |   |   |
| HILICneg_151.0406_0.96 | HILIC | neg        | 0.96            | 151.0406   |            | 4    |          | 0.74355 | 0.89757                                 | 0.09  | 0.17  | 0.29   | 0.38  | 0.01  | 0.12                  | 0.88275 | 0.98281 | 0.06    | 0.08  | -0.03 | 0.08                       | 0.16  | 0.36  | -0.24   |   |   |                       |   |   |         |   |   |
| HILICpos_151.0475_5.7  | HILIC | pos        | 5.7             | 151.0475   |            | 4    |          | 0.89136 | 0.96044                                 | 0.02  | 0.04  | 0.04   | 0.14  | 0.05  | -0.03                 | 0.64033 | 0.93638 | -0.10   | -0.13 | -0.07 | -0.02                      | -0.12 | -0.14 | -0.19   |   |   |                       |   |   |         |   |   |
| HILICpos_151.0479_6.13 | HILIC | pos        | 6.13            | 151.0479   |            | 4    |          | 0.88017 | 0.95541                                 | -0.01 | 0.28  | 0.51   | 0.30  | 0.09  | -0.19                 | 0.08670 | 0.54471 | 0.23    | 0.55  | 0.34  | 0.57                       | 0.27  | 0.05  | -0.81   |   |   |                       |   |   |         |   |   |
| HILICneg_151.0616_3.34 | HILIC | neg        | 3.34            | 151.0616   |            | 4    |          | 0.54927 | 0.80347                                 | -0.18 | 0.00  | -0.15  | -0.22 | -0.09 | -0.07                 | 0.30842 | 0.80758 | -0.24   | -0.15 | 0.14  | -0.12                      | 0.02  | -0.47 | -0.24   |   |   |                       |   |   |         |   |   |
| HILICpos_151.0961_0.63 | HILIC | pos        | 0.63            | 151.0961   |            | 4    |          | 0.84469 | 0.94193                                 | -0.05 | -0.39 | -0.09  | 0.39  | 0.11  | 0.67                  | 0.80680 | 0.97033 | 0.09    | 0.01  | 0.08  | -0.56                      | 0.63  | -0.12 | 0.20    |   |   |                       |   |   |         |   |   |
| RPneg_151.11301_7.724  | RP    | neg        | 7.724           | 151.1130   |            | 4    |          | 0.58616 | 0.82169                                 | -0.10 | -0.03 | 0.06   | -0.10 | -0.02 | -0.29                 | 0.83104 | 0.97494 | 0.04    | 0.04  | 0.20  | -0.03                      | -0.05 | 0.06  | 0.07    |   |   |                       |   |   |         |   |   |
| HILICpos_151.1227_0.42 | HILIC | pos        | 0.42            | 151.1227   |            | 4    |          | 0.67795 | 0.86638                                 | 0.13  | -0.20 | -0.30  | 0.10  | 1.05  | 0.06                  | 0.54522 | 0.91577 | 0.28    | 0.36  | -0.01 | 0.39                       | -0.08 | 0.60  | -0.18   |   |   |                       |   |   |         |   |   |
| RPneg_151.98489_9.514  | RP    | neg        | 9.514           | 151.9849   |            | 4    |          | 0.33091 | 0.65593                                 | -0.15 | 0.55  | -0.28  | -0.03 | -0.26 | -0.64                 | 0.20578 | 0.72124 | -0.19   | -0.40 | 0.06  | 0.42                       | -0.05 | -0.32 | -0.38   |   |   |                       |   |   |         |   |   |
| HILICneg_152.0119_1.01 | HILIC | neg        | 1.01            | 152.0119   |            | 4    |          | 0.14222 | 0.48205                                 | -0.25 | 0.32  | 0.35   | 0.23  | 0.34  | -0.02                 | 0.15344 | 0.65936 | -0.06   | 0.06  | 0.03  | 0.17                       | -0.26 | 0.08  | -0.24   |   |   |                       |   |   |         |   |   |
| HILICpos_152.0217_1.22 | HILIC | pos        | 1.22            | 152.0217   |            | 4    |          | 0.95480 | 0.98360                                 | 0.01  | -0.01 | 0.15   | 0.43  | 0.23  | 0.73                  | 0.69775 | 0.95114 | -0.11   | -0.18 | -0.10 | 0.05                       | -0.30 | -0.02 | -0.09   |   |   |                       |   |   |         |   |   |
| RPneg_152.03598_6.238  | RP    | neg        | 6.238           | 152.0360   |            | 4    |          | 0.06408 | 0.37326                                 | -0.52 | 0.16  | -0.15  | -0.09 | -0.52 | 0.20                  | 0.30628 | 0.80640 | -0.36   | -0.19 | -0.20 | -0.22                      | -0.28 | -0.24 | -0.53   |   |   |                       |   |   |         |   |   |
| HILICneg_152.036_0.41  | HILIC | neg        | 0.41            | 152.0360   |            | 4    |          | 0.12711 | 0.46383                                 | -0.41 | 0.06  | -0.15  | -0.15 | -0.30 | 0.11                  | 0.15970 | 0.66876 | -0.46   | -0.16 | -0.29 | -0.64                      | -0.33 | -0.38 | -0.48   |   |   |                       |   |   |         |   |   |
| HILICneg_152.0487_3.74 | HILIC | neg        | 3.74            | 152.0487   |            | 4    |          | 0.80972 | 0.92703                                 | -0.11 | 0.01  | 0.10   | 0.10  | 0.03  | -0.51                 | 0.00000 | 0.00016 | 0.51    | 0.52  | 0.61  | 0.39                       | 0.46  | 0.43  | 0.49    |   |   |                       |   |   |         |   |   |
| HILICpos_152.0541_4.61 | HILIC | pos        | 4.61            | 152.0541   |            | 4    |          | 0.85048 | 0.94371                                 | 0.07  | 0.20  | 0.95   | 0.22  | -0.19 | -0.62                 | 0.00490 | 0.14730 | 0.76    | 0.42  | 0.92  | 1.43                       | 0.62  | 0.51  | -0.45   |   |   |                       |   |   |         |   |   |
| HILICpos_152.0566_4.25 | HILIC | pos        | 4.25            | 152.0566   |            | 4    |          | 0.08773 | 0.41432                                 | -0.39 | -0.21 | -0.57  | -0.47 | 0.11  | 0.09                  | 0.23251 | 0.74941 | -0.38   | -0.48 | 0.08  | -1.00                      | -0.42 | -0.77 | 0.12    |   |   |                       |   |   |         |   |   |
| RPpos_152.0569_1.69    | RP    | pos        | 1.69            | 152.0569   |            | 4    |          | 0.05085 | 0.34726                                 | -0.40 | -0.24 | -0.67  | -0.39 | 0.11  | 0.04                  | 0.18325 | 0.69928 | -0.39   | -0.41 | -0.02 | 0.99                       | -0.50 | -0.77 | 0.13    |   |   |                       |   |   |         |   |   |
| HILICpos_152.0704_3.5  | HILIC | pos        | 3.5             | 152.0704   |            | 4    |          | 0.05201 | 0.34974                                 | -0.48 | 0.11  | -0.90  | -0.59 | -0.33 | -0.43                 | 0.07968 | 0.52940 | 0.56    | -0.79 | 0.30  | 0.64                       | 2.22  | 0.11  | -0.56   |   |   |                       |   |   |         |   |   |
| HILICpos_152.0708_5.2  | HILIC | pos        | 5.2             | 152.0708   |            | 4    |          | 0.17166 | 0.51704                                 | -0.14 | 0.03  | 0.01   | 0.00  | -0.13 | -0.21                 | 0.06531 | 0.49470 | -0.20   | -0.06 | -0.11 | -0.15                      | -0.28 | -0.32 | -0.05   |   |   |                       |   |   |         |   |   |
| RPpos_152.391_6.13     | RP    | pos        | 6.13            | 152.3910   |            | 4    |          | 0.97978 | 0.99230                                 | 0.01  | 0.48  | 0.89   | -0.03 | 0.63  | 0.21                  | 0.89942 | 0.98550 | 0.07    | 1.76  | 0.13  | -0.39                      | 0.16  | -0.07 | -0.49   |   |   |                       |   |   |         |   |   |
| HILICneg_152.9787_4.37 | HILIC | neg        | 4.37            | 152.9787   |            | 4    |          | 0.34821 | 0.66880                                 |       |       |        |       |       |                       |         |         |         |       |       |                            |       |       |         |   |   |                       |   |   |         |   |   |

| Feature_ID             | Mode  | Ionization | Average RT.min. | Average Mz | Metabolite | MSMS | ID_Level | HMDB_ID | IV-Alcohol self-administration (IV-ASA) |         |       |        |       |       |                       |       |         |          |       |       | IV-Alcohol clamp (IV-AC)   |       |       |        |       |   |                       |   |   |  |  |  |
|------------------------|-------|------------|-----------------|------------|------------|------|----------|---------|-----------------------------------------|---------|-------|--------|-------|-------|-----------------------|-------|---------|----------|-------|-------|----------------------------|-------|-------|--------|-------|---|-----------------------|---|---|--|--|--|
|                        |       |            |                 |            |            |      |          |         | Area Under the Curve (AUC)              |         |       |        |       |       | IV-Ghrelin or Placebo |       |         |          |       |       | Area Under the Curve (AUC) |       |       |        |       |   | IV-Ghrelin or Placebo |   |   |  |  |  |
|                        |       |            |                 |            |            |      |          |         | Baseline                                |         |       | IV-ASA |       |       | BrAC=0                |       |         | Baseline |       |       | Post-LD                    |       |       | IV-ASA |       |   | BrAC=0                |   |   |  |  |  |
|                        |       |            |                 |            |            |      |          |         | p                                       | q       | d     | d      | d     | d     | d                     | d     | d       | p        | q     | d     | d                          | d     | d     | d      | d     | d | d                     | d | d |  |  |  |
| HILICpos_155.0923_1.22 | HILIC | pos        | 1.22            | 155.0923   |            |      | 4        |         | 0.89471                                 | 0.96181 | 0.04  | 0.21   | 0.32  | 0.43  | 0.28                  | 0.33  | 0.83019 | 0.97467  | -0.02 | -0.13 | -0.03                      | 0.05  | -0.08 | 0.09   | -0.04 |   |                       |   |   |  |  |  |
| HILICpos_155.1066_4.21 | HILIC | pos        | 4.21            | 155.1066   |            |      | 4        |         | 0.13477                                 | 0.47406 | -0.34 | -0.69  | 0.53  | 0.15  | -0.66                 | -0.40 | 0.76907 | 0.96454  | -0.01 | 0.23  | 0.11                       | -0.10 | 0.54  | -0.01  | -1.20 |   |                       |   |   |  |  |  |
| RPpos_155.1067_10.19   | RP    | pos        | 10.19           | 155.1067   |            |      | 4        |         | 0.17279                                 | 0.51833 | -0.62 | -0.87  | 0.19  | -0.56 | 0.09                  | -0.23 | 0.43126 | 0.87439  | -0.41 | -0.05 | 0.31                       | 0.01  | -0.64 | 0.05   | -0.59 |   |                       |   |   |  |  |  |
| HILICpos_155.1178_0.51 | HILIC | pos        | 0.51            | 155.1178   |            |      | 4        |         | 0.57474                                 | 0.81603 | -0.06 | -0.07  | -0.02 | -0.06 | -0.01                 | 0.27  | 0.76703 | 0.96401  | -0.05 | -0.05 | -0.03                      | -0.04 | 0.03  | -0.05  | -0.11 |   |                       |   |   |  |  |  |
| HILICneg_155.6423_4.41 | HILIC | neg        | 4.41            | 155.6423   |            |      | 4        |         | 0.27448                                 | 0.61013 | -0.40 | -0.15  | 0.07  | -0.03 | 0.03                  | 0.12  | 0.50606 | 0.90356  | -0.09 | 0.03  | -0.37                      | 0.31  | -0.22 | -0.21  | 0.11  |   |                       |   |   |  |  |  |
| HILICneg_155.8745_1.17 | HILIC | neg        | 6.17            | 155.8745   |            |      | 4        |         | 0.30950                                 | 0.63797 | -0.28 | 0.08   | 0.46  | 0.21  | -0.36                 | -0.47 | 0.15511 | 0.66631  | -0.29 | 0.18  | -0.17                      | 0.37  | 0.26  | 0.29   | -0.12 |   |                       |   |   |  |  |  |
| HILICpos_156.0422_3.6  | HILIC | pos        | 3.6             | 156.0422   |            |      | 4        |         | 0.33389                                 | 0.65760 | -0.22 | 0.02   | 0.16  | -0.03 | -0.15                 | -0.51 | 0.00001 | 0.00294  | 0.49  | 0.42  | 0.38                       | 0.64  | 0.51  | 0.49   | 0.05  |   |                       |   |   |  |  |  |
| HILICneg_156.0534_4.21 | HILIC | neg        | 4.21            | 156.0534   |            |      | 4        |         | 0.17891                                 | 0.52425 | -0.18 | 0.28   | 0.41  | -0.16 | -0.27                 | -0.45 | 0.39365 | 0.85381  | -0.27 | -0.19 | -0.45                      | 0.08  | 0.24  | -0.31  | -0.58 |   |                       |   |   |  |  |  |
| HILICneg_156.0672_1.07 | HILIC | neg        | 1.07            | 156.0672   |            |      | 4        |         | 0.32641                                 | 0.65171 | 0.13  | 0.21   | 0.39  | 0.08  | 0.10                  | 0.17  | 0.17564 | 0.69019  | 0.31  | 0.10  | 0.25                       | 0.74  | 0.42  | 0.19   | 0.07  |   |                       |   |   |  |  |  |
| RPneg_156.06734_2.914  | RP    | neg        | 2.914           | 156.0673   |            |      | 4        |         | 0.46238                                 | 0.75264 | 0.11  | 0.17   | 0.31  | 0.12  | 0.07                  | 0.07  | 0.16989 | 0.68210  | 0.41  | 0.35  | 0.46                       | 0.73  | 0.65  | 0.18   | 0.07  |   |                       |   |   |  |  |  |
| HILICneg_156.0782_6.98 | HILIC | neg        | 6.98            | 156.0782   |            |      | 4        |         | 0.86455                                 | 0.94954 | -0.06 | 0.08   | 0.38  | 0.07  | 0.01                  | -0.18 | 0.20811 | 0.72383  | 0.13  | 0.05  | 0.33                       | 0.42  | 0.09  | -0.20  | -0.18 |   |                       |   |   |  |  |  |
| HILICpos_156.1021_5.01 | HILIC | pos        | 5.01            | 156.1021   |            |      | 4        |         | 0.44972                                 | 0.74356 | -0.12 | -0.06  | -0.10 | -0.14 | -0.06                 | 0.14  | 0.64885 | 0.93907  | -0.19 | -0.19 | -0.16                      | -0.11 | -0.17 | -0.23  | -0.12 |   |                       |   |   |  |  |  |
| RPpos_156.3685_7.26    | RP    | pos        | 7.26            | 156.3685   |            |      | 4        |         | 0.17057                                 | 0.51560 | 0.65  | 0.40   | 0.97  | 0.54  | 0.56                  | -0.27 | 0.01991 | 0.29846  | 1.02  | 0.82  | 0.87                       | 0.84  | 0.67  | 1.22   | -0.07 |   |                       |   |   |  |  |  |
| HILICpos_156.3698_0.71 | HILIC | pos        | 0.71            | 156.3698   |            |      | 4        |         | 0.24157                                 | 0.58206 | 0.54  | 0.32   | 0.82  | 0.50  | 0.53                  | -0.15 | 0.11974 | 0.60666  | 0.64  | 0.80  | 0.74                       | 0.47  | 0.07  | 0.85   | -0.06 |   |                       |   |   |  |  |  |
| HILICpos_156.9907_0.94 | HILIC | pos        | 0.94            | 156.9907   |            |      | 4        |         | 0.64746                                 | 0.85103 | 0.08  | 0.15   | 0.18  | 0.24  | 0.28                  | -0.34 | 0.01734 | 0.28106  | -0.40 | -0.36 | -0.52                      | -0.21 | -0.41 | -0.38  | -0.55 |   |                       |   |   |  |  |  |
| HILICneg_157.0258_5.23 | HILIC | neg        | 5.23            | 157.0258   |            |      | 4        |         | 0.76819                                 | 0.90882 | 0.01  | 0.07   | 0.15  | 0.08  | 0.15                  | -0.30 | 0.45916 | 0.88479  | 0.01  | -0.14 | 0.01                       | 0.03  | 0.00  | -0.10  | 0.53  |   |                       |   |   |  |  |  |
| HILICneg_157.0371_1.94 | HILIC | neg        | 1.94            | 157.0371   |            |      | 4        |         | 0.67999                                 | 0.86708 | 0.10  | 0.08   | 0.60  | 0.29  | 0.19                  | -0.41 | 0.71045 | 0.95280  | 0.55  | 0.92  | 0.84                       | 0.45  | 1.04  | 0.31   | 0.12  |   |                       |   |   |  |  |  |
| RPneg_157.08691_6.619  | RP    | neg        | 6.619           | 157.0869   |            |      | 4        |         | 0.48865                                 | 0.77035 | -0.18 | -0.23  | -0.08 | 0.26  | -0.06                 | -0.20 | 0.97728 | 0.99726  | -0.02 | -0.25 | -0.12                      | -0.01 | 0.14  | 0.15   | -0.07 |   |                       |   |   |  |  |  |
| RPneg_157.08707_7.385  | RP    | neg        | 7.385           | 157.0871   |            |      | 4        |         | 0.74487                                 | 0.87943 | 0.07  | 0.15   | 0.26  | 0.33  | 0.23                  | 0.19  | 0.76336 | 0.96314  | -0.14 | -0.38 | -0.27                      | 0.14  | -0.04 | 0.05   | -0.01 |   |                       |   |   |  |  |  |
| RPneg_157.08737_6.191  | RP    | neg        | 6.191           | 157.0874   |            |      | 4        |         | 0.12014                                 | 0.45565 | -0.17 | -0.04  | 0.11  | -0.05 | 0.03                  | 0.26  | 0.40327 | 0.85869  | 0.15  | -0.39 | 0.26                       | 0.16  | 0.07  | 0.50   | 0.12  |   |                       |   |   |  |  |  |
| HILICneg_157.0876_0.66 | HILIC | neg        | 0.66            | 157.0876   |            |      | 4        |         | 0.53387                                 | 0.79562 | -0.17 | -0.19  | -0.07 | 0.19  | -0.03                 | -0.13 | 0.89751 | 0.98506  | 0.01  | -0.25 | 0.10                       | 0.04  | 0.19  | 0.17   | -0.13 |   |                       |   |   |  |  |  |
| HILICpos_157.0972_4.76 | HILIC | pos        | 4.76            | 157.0972   |            |      | 4        |         | 0.08348                                 | 0.40892 | -0.28 | -0.10  | -0.05 | -0.26 | 0.13                  | -0.70 | 0.31683 | 0.81306  | 0.24  | -0.10 | -0.12                      | 0.53  | 0.43  | -0.07  | 0.45  |   |                       |   |   |  |  |  |
| HILICpos_157.0972_4.27 | HILIC | pos        | 4.27            | 157.0972   |            |      | 4        |         | 0.27915                                 | 0.61371 | -0.13 | -0.04  | -0.02 | 0.00  | -0.12                 | 0.20  | 0.48637 | 0.89761  | -0.21 | -0.33 | -0.27                      | -0.16 | -0.03 | -0.28  | -0.09 |   |                       |   |   |  |  |  |
| HILICpos_157.0972_5.11 | HILIC | pos        | 5.11            | 157.0972   |            |      | 4        |         | 0.07870                                 | 0.40147 | -0.24 | 0.04   | -0.16 | -0.17 | 0.10                  | -0.73 | 0.51698 | 0.90777  | 0.25  | -0.19 | -0.03                      | 0.70  | 0.45  | -0.24  | 0.56  |   |                       |   |   |  |  |  |
| HILICpos_157.17_5.57   | HILIC | pos        | 5.57            | 157.1700   |            |      | 4        |         | 0.44110                                 | 0.73811 | 0.29  | 0.18   | 0.17  | 1.46  | 0.31                  | -0.69 | 0.43585 | 0.87641  | 0.17  | -0.16 | 1.50                       | 0.13  | -0.02 | 0.07   | -0.52 |   |                       |   |   |  |  |  |
| RPneg_157.89944_14.177 | RP    | neg        | 14.177          | 157.8994   |            |      | 4        |         | 0.30369                                 | 0.63289 | -0.25 | 0.49   | -0.37 | 0.08  | -0.02                 | 0.59  | 0.32312 | 0.81674  | -0.15 | -0.31 | -0.49                      | -0.21 | 0.02  | 0.12   | -0.34 |   |                       |   |   |  |  |  |
| HILICpos_158.0402_3.6  | HILIC | pos        | 3.6             | 158.0402   |            |      | 4        |         | 0.69686                                 | 0.87590 | -0.16 | -0.04  | 0.24  | -0.04 | 0.19                  | -0.58 | 0.00006 | 0.00859  | 0.49  | 0.49  | 0.40                       | 0.46  | 0.52  | 0.54   | -0.01 |   |                       |   |   |  |  |  |
| RPneg_158.06146_4.734  | RP    | neg        | 4.734           | 158.0615   |            |      | 4        |         | 0.67896                                 | 0.86667 | 0.08  | 0.23   | 0.37  | 0.52  | 0.18                  | -0.06 | 0.16188 | 0.67149  | -0.04 | -0.13 | 0.02                       | -0.02 | 0.00  | -0.08  | 0.06  |   |                       |   |   |  |  |  |
| HILICneg_158.0808_0.67 | HILIC | neg        | 0.67            | 158.0808   |            |      | 4        |         | 0.23759                                 | 0.57910 | -0.19 | -0.09  | -0.21 | -0.19 | -0.11                 | -0.40 | 0.09955 | 0.57123  | -0.13 | -0.02 | -0.06                      | -0.16 | -0.18 | -0.15  | -0.08 |   |                       |   |   |  |  |  |
| HILICneg_158.0825_0.66 | HILIC | neg        | 0.66            | 158.0825   |            |      | 4        |         | 0.81099                                 | 0.92751 | 0.06  | 0.21   | 0.17  | 0.40  | 0.09                  | -0.21 | 0.37217 | 0.84176  | 0.46  | 0.40  | 0.70                       | 0.59  | 0.54  | 0.77   | 0.53  |   |                       |   |   |  |  |  |
| HILICneg_158.0825_0.96 | HILIC | neg        | 0.96            | 158.0825   |            |      | 4        |         | 0.38535                                 | 0.69778 | 0.12  | 0.16   | 0.37  | 0.22  | 0.08                  | -0.26 | 0.14425 | 0.64706  | 0.46  | 0.40  | 0.63                       | 0.76  | 0.48  | 0.48   | -0.15 |   |                       |   |   |  |  |  |
| RPneg_158.08273_3.158  | RP    | neg        | 3.158           | 158.0827   |            |      | 4        |         | 0.64107                                 | 0.84801 | -0.03 | 0.09   | 0.39  | 0.13  | -0.09                 | -0.25 | 0.06202 | 0.48484  | 1.07  | 0.92  | 1.15                       | 0.94  | 1.18  | 1.31   | -0.21 |   |                       |   |   |  |  |  |
| RPneg_158.0828_1.321   | RP    | neg        | 1.321           | 158.0828   |            |      | 4        |         | 0.79017                                 | 0.91801 | -0.07 | 0.24   | 0.22  | 0.43  | 0.05                  | -0.24 | 0.37950 | 0.84640  | 0.47  | 0.33  | 0.64                       | 0.63  | 0.55  | 0.94   | 0.48  |   |                       |   |   |  |  |  |
| RPneg_158.08286_4.25   | RP    | neg        | 4.25            | 158.0829   |            |      | 4        |         | 0.39017                                 | 0.70136 | 0.26  | 0.23   | 0.56  | 0.64  | -0.29                 | 0.01  | 0.87116 | 0.98093  | -0.04 | 0.07  | 0.38                       | -0.26 | 0.41  | 0.94   | -0.40 |   |                       |   |   |  |  |  |
| HILICpos_158.0842_4.07 | HILIC | pos        | 4.07            | 158.0842   |            |      | 4        |         | 0.10158                                 | 0.43389 | -0.32 | -0.03  | 0.47  | 0.12  | -0.79                 | 1.18  | 0.95258 | 0.99379  | -0.02 | 0.04  | 0.05                       | 0.17  | 0.24  | -0.19  | -0.36 |   |                       |   |   |  |  |  |
| HILICpos_158.0923_6.95 | HILIC | pos        | 6.95            | 158.0923   |            |      | 4        |         | 0.34481                                 | 0.66619 | -0.30 | 0.18   | 0.37  | -0.48 | -0.21                 | -0.44 | 0.90088 | 0.98559  | -0.02 | 0.36  | 0.37                       | 0.22  | -0.27 | -0.55  | -0.04 |   |                       |   |   |  |  |  |
| HILICpos_158.0923_4.89 | HILIC | pos        | 4.89            | 158.0923   |            |      | 4        |         | 0.87420                                 | 0.95278 | -0.01 | 0.04   | 0.46  | 0.54  | 0.03                  | -0.03 | 0.52099 | 0.90888  | 0.16  | 0.08  | 0.75                       | 0.67  | 0.17  | -0.55  | 0.14  |   |                       |   |   |  |  |  |
| HILICpos_158.1036_1.22 | HILIC | pos        | 1.22            | 158.1036   |            |      | 4        |         | 0.91382                                 | 0.96820 | 0.01  | -0.31  | 0.05  | 0.42  | 0.06                  | 0.45  | 0.25410 | 0.76928  | -0.38 | -0.37 | -0.41                      | 0.09  | -0.40 | -0.87  | 0.10  |   |                       |   |   |  |  |  |
| HILICpos_158.1174_2.22 | HILIC | pos        | 2.22            | 158.1174   |            |      | 4        |         | 0.93945                                 | 0.97791 | 0.05  | 0.18   | 0.16  | 0.34  | 0.16                  | 0.04  | 0.52818 | 0.91029  | -0.16 | -0.18 | -0.17                      | -0.12 | -0.11 | -0.17  | -0.22 |   |                       |   |   |  |  |  |
| HILICpos_158.1176_3    | HILIC | pos        | 3               | 158.1176   |            |      | 4        |         | 0.27576                                 | 0.61083 | -0.24 | -0.18  | -0.19 | -0.16 | -0.11                 | -0.29 | 0.58798 | 0.92623  | 0.06  | 0.05  | 0.01                       | 0.00  | 0.04  | 0.03   | 0.14  |   |                       |   |   |  |  |  |
| HILICpos_158.1177_0.53 | HILIC | pos        | 0.53            | 158.1177   |            |      | 4        |         | 0.59486                                 | 0.82647 | 0.08  | 0.05   | 0.15  | 0.05  | 0.07                  | -0.10 | 0.37971 | 0.84642  | 2.11  | 1.99  | 2.11                       | 2.23  | 2.02  | 2.17   | 2.06  |   |                       |   |   |  |  |  |
| HILICpos_158.1536_1.21 | HILIC | pos        | 1.21            | 158.1536   |            |      | 4        |         | 0.36982                                 | 0.68609 | 0.07  | 0.14   | -0.13 | 0.54  | 0.26                  | 0.38  | 0.27386 | 0.78431  | 0.08  | 0.12  | 0.39                       | 0.75  | 0.03  | 0.06   | 0.61  |   |                       |   |   |  |  |  |
| HILICpos_158.1537_0.74 | HILIC | pos        | 0.74            | 158.1537   |            |      | 4        |         | 0.94698                                 | 0.98048 | -0.06 | 0.10   | 0.55  | 0.33  | -0.41                 | 0.17  | 0.96492 | 0.99626  | -0.12 | -0.04 | -0.20                      | 0.13  | -0.10 | -0.08  | -0.74 |   |                       |   |   |  |  |  |
| HILICpos_158.504_0.75  | HILIC | pos        | 0.75            | 158.5040   |            |      | 4        |         | 0.51513                                 | 0.78530 | 0.20  | 0.08   | 0.43  | 0.21  | 0.44                  | 0.00  | 0.10    |          |       |       |                            |       |       |        |       |   |                       |   |   |  |  |  |

| Feature_ID             | Mode  | Ionization | Average_Rt.min. | Average_Mz | Metabolite | MSMS | ID_Level | HMDB_ID | IV-Alcohol self-administration (IV-ASA) |       |        |       |       |                       |       |                       |         |       | IV-Alcohol clamp (IV-AC)   |       |        |       |       |                       |   |                       |   |   |
|------------------------|-------|------------|-----------------|------------|------------|------|----------|---------|-----------------------------------------|-------|--------|-------|-------|-----------------------|-------|-----------------------|---------|-------|----------------------------|-------|--------|-------|-------|-----------------------|---|-----------------------|---|---|
|                        |       |            |                 |            |            |      |          |         | Area Under the Curve (AUC)              |       |        |       |       | IV-Ghrelin or Placebo |       |                       |         |       | Area Under the Curve (AUC) |       |        |       |       | IV-Ghrelin or Placebo |   |                       |   |   |
|                        |       |            |                 |            |            |      |          |         | Baseline                                |       | IV-ASA |       |       | Baseline              |       | IV-Ghrelin or Placebo |         |       | Baseline                   |       | IV-ASA |       |       | Baseline              |   | IV-Ghrelin or Placebo |   |   |
|                        |       |            |                 |            |            |      |          |         | p                                       | q     | d      | d     | d     | d                     | d     | d                     | d       | d     | p                          | q     | d      | d     | d     | d                     | d | d                     | d | d |
| HILICpos_160.1082_3.09 | HILIC | pos        | 3.09            | 160.1082   |            | 4    |          | 0.14044 | 0.48047                                 | -0.12 | -0.07  | 0.02  | -0.12 | -0.05                 | -0.05 | 0.17783               | 0.69251 | 0.11  | 0.11                       | 0.07  | 0.14   | 0.20  | 0.03  | 0.14                  |   |                       |   |   |
| HILICpos_160.1331_1.9  | HILIC | pos        | 1.9             | 160.1331   |            | 4    |          | 0.83324 | 0.93727                                 | -0.01 | 0.14   | 0.19  | 0.20  | 0.12                  | -0.17 | 0.62007               | 0.93310 | 0.08  | -0.09                      | -0.04 | 0.14   | 0.24  | 0.18  | -0.10                 |   |                       |   |   |
| HILICpos_160.1332_2.21 | HILIC | pos        | 2.21            | 160.1332   |            | 4    |          | 0.37371 | 0.68944                                 | -0.14 | 0.12   | 0.16  | 0.09  | -0.12                 | -0.23 | 0.93973               | 0.99108 | -0.05 | 0.00                       | -0.18 | 0.22   | 0.10  | -0.12 | -0.30                 |   |                       |   |   |
| HILICpos_160.1332_2.03 | HILIC | pos        | 2.03            | 160.1332   |            | 4    |          | 0.29521 | 0.62676                                 | -0.11 | 0.01   | 0.03  | 0.27  | -0.05                 | -0.10 | 0.20731               | 0.72381 | -0.18 | -0.25                      | -0.14 | -0.07  | -0.15 | -0.15 | -0.37                 |   |                       |   |   |
| RPpos_160.1335_6.85    | RP    | pos        | 6.85            | 160.1335   |            | 4    |          | 0.66042 | 0.85781                                 | -0.29 | 0.11   | 0.06  | 0.60  | 0.09                  | -0.48 | 0.61126               | 0.93043 | 0.00  | 0.04                       | 0.17  | 0.21   | 0.05  | 0.02  | -0.03                 |   |                       |   |   |
| HILICneg_160.8424_1.41 | HILIC | neg        | 1.41            | 160.8424   |            | 4    |          | 0.58052 | 0.99230                                 | 0.00  | 0.11   | 0.10  | 0.20  | 0.58                  | 0.24  | 0.01618               | 0.72221 | 0.58  | 0.55                       | 0.21  | 0.18   | 0.26  | 0.53  | 0.51                  |   |                       |   |   |
| HILICneg_160.8425_0.4  | HILIC | neg        | 0.4             | 160.8425   |            | 4    |          | 0.90007 | 0.96330                                 | -0.05 | 0.49   | -0.02 | 0.29  | 0.22                  | 0.40  | 0.68444               | 0.94844 | -0.18 | -0.27                      | 0.57  | -0.21  | -0.51 | -0.01 | -0.99                 |   |                       |   |   |
| HILICneg_160.8425_7.39 | HILIC | neg        | 7.39            | 160.8425   |            | 4    |          | 0.26963 | 0.60569                                 | -0.34 | -0.23  | 0.34  | -0.12 | -0.23                 | 0.05  | 0.55545               | 0.91894 | 0.19  | 0.12                       | 0.90  | -0.09  | 0.31  | -0.81 | 1.10                  |   |                       |   |   |
| HILICneg_160.8425_0.53 | HILIC | neg        | 0.53            | 160.8425   |            | 4    |          | 0.82404 | 0.93341                                 | 0.10  | 0.01   | 0.42  | 0.45  | 0.11                  | 0.02  | 0.79050               | 0.96713 | -0.10 | -0.61                      | -0.39 | 0.03   | 0.37  | 0.25  | -0.10                 |   |                       |   |   |
| RPneg_160.84288_4.781  | RP    | neg        | 4.781           | 160.8429   |            | 4    |          | 0.49602 | 0.77392                                 | -0.26 | -0.33  | -0.23 | -0.02 | 0.02                  | 0.40  | 0.03460               | 0.38093 | -0.64 | -0.22                      | -0.52 | -0.15  | -0.52 | -0.54 | 0.77                  |   |                       |   |   |
| HILICneg_161.0094_3.33 | HILIC | neg        | 3.33            | 161.0094   |            | 4    |          | 0.97661 | 0.99092                                 | 0.01  | 0.06   | 0.33  | 0.31  | -0.17                 | -0.18 | 0.86655               | 0.98008 | 0.13  | 0.40                       | -0.09 | 0.28   | -0.26 | 0.87  | -0.21                 |   |                       |   |   |
| HILICneg_161.0094_3.21 | HILIC | neg        | 3.21            | 161.0094   |            | 4    |          | 0.94417 | 0.97946                                 | -0.02 | 0.04   | 0.33  | 0.20  | 0.03                  | -0.15 | 0.56236               | 0.92016 | 0.25  | 0.20                       | 0.39  | 0.33   | -0.06 | 0.42  | -0.19                 |   |                       |   |   |
| RPneg_161.02504_5.782  | RP    | neg        | 5.782           | 161.0250   |            | 4    |          | 0.59219 | 0.82498                                 | 0.18  | 0.35   | 0.34  | 0.17  | 0.19                  | 0.25  | 0.58071               | 0.92418 | 0.24  | 0.23                       | 0.17  | 0.34   | 0.35  | 0.18  | 0.20                  |   |                       |   |   |
| HILICpos_161.0273_0.94 | HILIC | pos        | 0.94            | 161.0273   |            | 4    |          | 0.57193 | 0.81512                                 | 0.08  | 0.13   | 0.18  | 0.24  | 0.25                  | -0.32 | 0.00433               | 0.13656 | -0.44 | -0.50                      | -0.55 | -0.33  | -0.33 | -0.41 | -0.57                 |   |                       |   |   |
| HILICpos_161.0379_5.2  | HILIC | pos        | 5.2             | 161.0379   |            | 4    |          | 0.55310 | 0.80544                                 | 0.30  | 0.29   | 0.69  | -0.17 | 0.44                  | 0.88  | 0.09264               | 0.55931 | 0.26  | 0.16                       | 0.37  | 0.07   | 0.10  | 0.47  | 0.38                  |   |                       |   |   |
| HILICneg_161.0459_5.17 | HILIC | neg        | 5.17            | 161.0459   |            | 4    |          | 0.04250 | 0.32870                                 | 0.45  | 0.32   | 0.77  | 0.76  | 0.34                  | 0.25  | 0.48625               | 0.89761 | -0.36 | 0.36                       | -0.48 | -0.84  | 0.35  | -0.52 | 0.18                  |   |                       |   |   |
| HILICneg_161.0822_0.84 | HILIC | neg        | 0.84            | 161.0822   |            | 4    |          | 0.48340 | 0.76654                                 | 0.30  | 0.40   | 0.44  | 0.51  | 0.50                  | 0.12  | 0.64208               | 0.93677 | -0.03 | 0.06                       | 0.07  | -0.02  | -0.18 | 0.00  | 0.01                  |   |                       |   |   |
| HILICpos_161.0921_5.64 | HILIC | pos        | 5.64            | 161.0921   |            | 4    |          | 0.06909 | 0.38211                                 | 0.24  | 0.24   | 0.64  | 0.35  | 0.22                  | -0.17 | 0.49510               | 0.89982 | 0.16  | 0.10                       | 0.15  | 0.31   | 0.18  | 0.19  | -0.19                 |   |                       |   |   |
| HILICneg_161.985_0.92  | HILIC | neg        | 0.92            | 161.9850   |            | 4    |          | 0.15141 | 0.49379                                 | -0.29 | -0.32  | -0.22 | -0.21 | -0.30                 | -0.16 | 0.08740               | 0.54647 | -0.42 | -0.46                      | -0.41 | -0.44  | -0.47 | -0.41 | -0.23                 |   |                       |   |   |
| RPneg_161.90398_4.708  | RP    | neg        | 4.708           | 161.9040   |            | 4    |          | 0.68682 | 0.87086                                 | -0.18 | -0.40  | -0.01 | -0.45 | 0.33                  | 0.14  | 0.23659               | 0.74356 | 0.68  | 0.34                       | 0.28  | 0.67   | 0.26  | 1.21  | 0.86                  |   |                       |   |   |
| RPneg_161.98683_1.198  | RP    | neg        | 1.198           | 161.9868   |            | 4    |          | 0.10182 | 0.43449                                 | 1.27  | 0.14   | 0.68  | 0.95  | 1.36                  | 5.63  | 0.52511               | 0.90996 | -0.16 | -0.07                      | -0.09 | -0.26  | -0.13 | -0.09 | 0.04                  |   |                       |   |   |
| RPneg_161.98683_1.514  | RP    | neg        | 1.514           | 161.9868   |            | 4    |          | 0.17559 | 0.52097                                 | 1.32  | 0.03   | 0.56  | 1.12  | 1.80                  | 4.31  | 0.49310               | 0.89856 | -0.18 | -0.01                      | -0.14 | -0.20  | -0.22 | -0.09 | -0.12                 |   |                       |   |   |
| HILICneg_161.9943_6.23 | HILIC | neg        | 6.23            | 161.9943   |            | 4    |          | 0.27088 | 0.60684                                 | -0.25 | 0.05   | 0.28  | 0.08  | -0.14                 | 0.04  | 0.67296               | 0.94628 | -0.02 | -0.30                      | 0.08  | 0.57   | -0.60 | -0.12 | 0.31                  |   |                       |   |   |
| HILICneg_162.0201_0.5  | HILIC | neg        | 0.5             | 162.0201   |            | 4    |          | 0.03812 | 0.31543                                 | 0.24  | 0.35   | 0.46  | 0.17  | 0.29                  | 0.47  | 0.84890               | 0.97736 | 0.10  | 0.14                       | 0.20  | 0.24   | 0.03  | 0.05  | -0.05                 |   |                       |   |   |
| RPpos_162.0584_1.77    | RP    | pos        | 1.77            | 162.0584   |            | 4    |          | 0.34737 | 0.66802                                 | -0.20 | -0.04  | 0.03  | -0.21 | -0.25                 | -0.01 | 0.97705               | 0.99726 | -0.09 | -0.05                      | 0.11  | -0.06  | -0.16 | -0.05 | -0.33                 |   |                       |   |   |
| HILICpos_162.0759_1.1  | HILIC | pos        | 1.1             | 162.0759   |            | 4    |          | 0.87504 | 0.95315                                 | -0.24 | -0.22  | -0.26 | -0.25 | -0.10                 | -0.25 | 0.29821               | 0.80014 | 0.87  | 1.86                       | 1.17  | 1.91   | 0.97  | 0.13  | 0.06                  |   |                       |   |   |
| HILICpos_162.0777_3.74 | HILIC | pos        | 3.74            | 162.0777   |            | 4    |          | 0.52929 | 0.79301                                 | -0.14 | 0.01   | 0.16  | -0.02 | -0.04                 | -0.47 | 0.00000               | 0.00006 | 0.50  | 0.45                       | 0.50  | 0.51   | 0.51  | 0.47  | 0.27                  |   |                       |   |   |
| HILICneg_162.0779_6.43 | HILIC | neg        | 6.43            | 162.0779   |            | 4    |          | 0.71195 | 0.88244                                 | -0.01 | 0.13   | 0.28  | 0.11  | -0.08                 | -0.15 | 0.59050               | 0.92655 | -0.09 | -0.08                      | -0.09 | -0.09  | -0.09 | 0.03  | -0.26                 |   |                       |   |   |
| HILICpos_162.1124_5.91 | HILIC | pos        | 5.91            | 162.1124   |            | 4    |          | 0.33793 | 0.66080                                 | -0.19 | -0.14  | 0.25  | -0.29 | -0.05                 | -0.28 | 0.26455               | 0.77665 | -0.09 | 1.59                       | -0.54 | -0.46  | -0.07 | 0.73  | -0.27                 |   |                       |   |   |
| HILICpos_162.1125_5.32 | HILIC | pos        | 5.32            | 162.1125   |            | 4    |          | 0.36144 | 0.67972                                 | -0.08 | -0.05  | 0.19  | 0.15  | 0.18                  | -1.35 | 0.88307               | 0.98281 | 0.00  | -0.45                      | -0.12 | 0.58   | -0.04 | -0.16 | -1.35                 |   |                       |   |   |
| HILICpos_162.1126_5.45 | HILIC | pos        | 5.45            | 162.1126   |            | 4    |          | 0.49655 | 0.77423                                 | -0.09 | 0.23   | 0.17  | 0.15  | 0.10                  | -0.64 | 0.80803               | 0.97068 | -0.02 | 0.13                       | -0.17 | 0.07   | 0.06  | -0.02 | -0.12                 |   |                       |   |   |
| HILICneg_162.8394_1.41 | HILIC | neg        | 1.41            | 162.8394   |            | 4    |          | 0.85639 | 0.94625                                 | 0.07  | 0.19   | 0.12  | 0.65  | 0.60                  | 0.35  | 0.03275               | 0.37254 | 0.47  | 0.26                       | 0.21  | 0.83   | 0.24  | 0.43  | 0.95                  |   |                       |   |   |
| HILICneg_162.8394_0.53 | HILIC | neg        | 0.53            | 162.8394   |            | 4    |          | 0.96013 | 0.98597                                 | 0.08  | -0.05  | 0.29  | 0.44  | 0.09                  | 0.22  | 0.94225               | 0.99171 | -0.20 | -0.66                      | -0.04 | -0.37  | 0.11  | 0.14  | 0.15                  |   |                       |   |   |
| RPneg_162.8394_8.173   | RP    | neg        | 8.173           | 162.8394   |            | 4    |          | 0.18221 | 0.52814                                 | -0.24 | 0.10   | -0.40 | 0.19  | -0.14                 | -0.53 | 0.53860               | 0.91464 | -0.03 | 0.11                       | -0.27 | 0.19   | 0.12  | -0.36 | 0.07                  |   |                       |   |   |
| HILICneg_162.8395_0.4  | HILIC | neg        | 0.4             | 162.8395   |            | 4    |          | 0.80047 | 0.92283                                 | -0.09 | 0.49   | -0.23 | 0.24  | 0.18                  | 0.36  | 0.43748               | 0.87685 | -0.34 | -0.31                      | 0.36  | -0.40  | -0.40 | -0.23 | -0.80                 |   |                       |   |   |
| RPpos_162.8448_11.17   | RP    | pos        | 11.17           | 162.8448   |            | 4    |          | 0.70134 | 0.87812                                 | 0.15  | 0.15   | -0.01 | 0.12  | 0.86                  | -0.79 | 0.43297               | 0.87530 | 0.47  | 1.93                       | -0.02 | 0.34   | -0.29 | 0.27  | 0.10                  |   |                       |   |   |
| RPneg_162.93398_11.19  | RP    | neg        | 11.19           | 162.9340   |            | 4    |          | 0.01905 | 0.25131                                 | 2.61  | 0.64   | 0.06  | 2.94  | 3.92                  | -0.31 | 0.16412               | 0.67450 | -0.47 | 0.15                       | 0.08  | -0.81  | -0.28 | -0.47 | -0.22                 |   |                       |   |   |
| HILICneg_162.9406_0.92 | HILIC | neg        | 0.92            | 162.9406   |            | 4    |          | 0.04951 | 0.34580                                 | -0.33 | -0.30  | -0.24 | -0.18 | -0.24                 | -0.19 | 0.15171               | 0.65756 | -0.34 | -0.37                      | -0.30 | -0.38  | -0.25 | -0.31 | -0.13                 |   |                       |   |   |
| HILICpos_162.971_0.84  | HILIC | pos        | 0.84            | 162.9710   |            | 4    |          | 0.66488 | 0.85973                                 | 0.07  | 0.14   | 0.19  | 0.15  | 0.24                  | -0.09 | 0.00499               | 0.14866 | 0.38  | 0.37                       | 0.36  | 0.30   | 0.43  | 0.40  | 0.35                  |   |                       |   |   |
| HILICneg_162.9829_0.5  | HILIC | neg        | 0.5             | 162.9829   |            | 4    |          | 0.19730 | 0.54206                                 | -0.34 | -0.35  | -0.11 | -0.29 | -0.16                 | -0.54 | 0.36927               | 0.84019 | -0.01 | 0.18                       | 0.25  | 0.31   | -0.27 | 0.34  | -0.08                 |   |                       |   |   |
| HILICneg_163.0253_7.12 | HILIC | neg        | 7.12            | 163.0253   |            | 4    |          | 0.25267 | 0.59120                                 | -0.25 | -0.14  | -0.01 | -0.12 | -0.25                 | -0.75 | 0.94101               | 0.99151 | 0.01  | 0.31                       | 0.31  | 1.79   | -0.29 | -0.38 | -0.04                 |   |                       |   |   |
| HILICneg_163.0407_0.96 | HILIC | neg        | 0.96            | 163.0407   |            | 4    |          | 0.30159 | 0.63108                                 | 0.25  | 0.25   | 0.66  | 0.43  | 0.24                  | -0.14 | 0.01145               | 0.22835 | 0.98  | 0.67                       | 1.22  | 1.10   | 0.49  | 0.71  | 0.30                  |   |                       |   |   |
| HILICneg_163.0617_2.33 | HILIC | neg        | 2.33            | 163.0617   |            | 4    |          | 0.63784 | 0.84699                                 | 0.03  | 0.18   | 0.18  | 0.26  | 0.19                  | 0.07  | 0.37194               | 0.84160 | -0.10 | -0.09                      | -0.11 | -0.17  | 0.02  | -0.07 | -0.13                 |   |                       |   |   |
| HILICneg_163.0618_4.94 | HILIC | neg        | 4.94            | 163.0618   |            | 4    |          | 0.62096 | 0.83901                                 | -0.13 | -0.02  | 0.03  | -0.03 | -0.20                 | -0.85 | 0.93686               | 0.99026 | -0.08 | -0.14                      | -0.07 | 0.04   | -0.06 | -0.10 | -0.40                 |   |                       |   |   |
| HILICneg_163.062_5.69  | HILIC | neg        | 5.69            | 163.0620   |            | 4    |          | 0.81111 | 0.92758                                 | -0.05 | 0.12   | 0.34  | 0.19  | -0.20                 | -0.33 | 0.15100               | 0.90681 | 0.25  | 0.15                       | 0.63  | 0.59   | 0.39  | -0.01 | -0.51                 |   |                       |   |   |
| RPneg_163.0768_8.31    | RP    | neg        | 8.31            | 163.0767   |            | 4    |          | 0.87951 | 0.95506                                 | 0.01  | 0.17   | 0.17  | 0.01  | 0.19                  | -0.24 | 0.29538               | 0.79878 | 0.34  | 0.36                       | 0.38  | 0.33   | 0.26  | 0.27  | 0.34                  |   |                       |   |   |
| RPpos_163.0885_5.27    | RP    | pos        | 5.27            | 163.0885   |            | 4    |          | 0.39223 | 0.70267                                 | 0.28  | 0.65   | 0.02  | -0.11 | -0.14                 | -0.27 | 0.42379               | 0.86946 | -0.10 | -0.07                      | 0.03  | 0.07   | 0.04  | -0.43 | -0.32                 |   |                       |   |   |
| HILICpos_163.0968_2.35 | HILIC | pos        | 2.35            | 163.0968   |            | 4    |          | 0.06109 | 0.36821                                 | 0.61  | 0.14   | 0.81  | 0.59  | 0.92                  | 0.19  | 0.81742               | 0.97227 | 0.06  | -0.15                      | 0.28  | 0.10   | -0.02 | -0.18 | -0.22                 |   |                       |   |   |
| RPpos_163.1121_7.92    | RP    | pos        | 7.92            | 163.1121   |            | 4    |          | 0.08352 | 0.40892                                 | -0.49 | 0.04   | -0.48 | 0.00  | -0.59                 | -0.13 | 0.12548               | 0.61698 | -0.28 | -0.15                      | -0.22 | 0.42   | -0.11 | -0.58 | -0.21                 |   |                       |   |   |
| HILICpos_163.1225_1.27 | HILIC | pos        | 1.27            | 163.1225   |            | 4    |          | 0.47719 | 0.76257                                 | 0.13  | 0.02   |       |       |                       |       |                       |         |       |                            |       |        |       |       |                       |   |                       |   |   |



| Feature_ID             | Mode  | Ionization | Average_Rt.min. | Average_Mz | Metabolite | MSMS | ID_Level | HMDB_ID | IV-Alcohol self-administration (IV-ASA) |       |       |       |       |                       |       |         |         |       | IV-Alcohol clamp (IV-AC)   |       |       |       |       |                       |   |   |   |   |
|------------------------|-------|------------|-----------------|------------|------------|------|----------|---------|-----------------------------------------|-------|-------|-------|-------|-----------------------|-------|---------|---------|-------|----------------------------|-------|-------|-------|-------|-----------------------|---|---|---|---|
|                        |       |            |                 |            |            |      |          |         | Area Under the Curve (AUC)              |       |       |       |       | IV-Ghrelin or Placebo |       |         |         |       | Area Under the Curve (AUC) |       |       |       |       | IV-Ghrelin or Placebo |   |   |   |   |
|                        |       |            |                 |            |            |      |          |         | Baseline                                |       |       |       |       | BrAC=0                |       |         |         |       | Baseline                   |       |       |       |       | Post-LD               |   |   |   |   |
|                        |       |            |                 |            |            |      |          |         | p                                       | q     | d     | d     | d     | d                     | d     | d       | d       | d     | p                          | q     | d     | d     | d     | d                     | d | d | d | d |
| RPneg_165.09184_5.186  | RP    | neg        | 5.186           | 165.0918   |            | 4    |          | 0.62942 | 0.84323                                 | 0.16  | 0.11  | 0.34  | 0.59  | 0.14                  | 0.41  | 0.79112 | 0.96731 | 0.05  | -0.10                      | 0.02  | 0.20  | 0.20  | 0.10  | -0.10                 |   |   |   |   |
| RPneg_165.09259_5.927  | RP    | neg        | 5.927           | 165.0926   |            | 4    |          | 0.27723 | 0.61167                                 | 0.17  | 0.17  | 0.42  | 0.36  | 0.32                  | 0.02  | 0.02839 | 0.35171 | 0.33  | 0.33                       | 0.35  | 0.28  | 0.32  | 0.36  | 0.24                  |   |   |   |   |
| RPpos_165.1636_10.97   | RP    | pos        | 10.97           | 165.1636   |            | 4    |          | 0.17035 | 0.51532                                 | -0.52 | -0.21 | -0.06 | -0.04 | -0.39                 | -0.67 | 0.65119 | 0.93978 | 0.22  | 1.37                       | -0.25 | 0.31  | -0.03 | 0.10  | 0.68                  |   |   |   |   |
| HILICneg_165.9169_0.52 | HILIC | neg        | 0.52            | 165.9169   |            | 4    |          | 0.32112 | 0.64751                                 | 0.00  | -0.06 | 0.09  | 0.15  | 0.09                  | 0.37  | 0.10194 | 0.57518 | -0.02 | -0.17                      | -0.14 | 0.13  | -0.02 | 0.11  | -0.14                 |   |   |   |   |
| HILICneg_166.0095_4.33 | HILIC | neg        | 4.33            | 166.0095   |            | 4    |          | 0.88534 | 0.95758                                 | 0.03  | 0.29  | 0.68  | 0.07  | -0.02                 | -0.11 | 0.00031 | 0.02678 | 0.08  | 0.37                       | 0.51  | 0.67  | 0.54  | 0.07  | 0.07                  |   |   |   |   |
| HILICneg_166.0181_1.19 | HILIC | neg        | 1.19            | 166.0181   |            | 4    |          | 0.66125 | 0.93913                                 | 1.26  | 0.17  | 0.17  | 0.10  | 0.46                  | 0.36  | 0.08948 | 0.33    | 0.33  | 0.15                       | 0.48  | 0.28  | 1.26  | 0.26  | 0.26                  |   |   |   |   |
| HILICneg_166.0395_5.62 | HILIC | neg        | 5.62            | 166.0395   |            | 4    |          | 0.16935 | 0.51386                                 | -0.25 | -0.20 | 0.10  | -0.18 | -0.40                 | -0.21 | 0.05633 | 0.46881 | -0.05 | 0.05                       | 0.11  | 0.30  | 0.01  | -0.21 | -0.51                 |   |   |   |   |
| HILICneg_166.0722_1.59 | HILIC | pos        | 1.59            | 166.0722   |            | 4    |          | 0.08261 | 0.40762                                 | -0.31 | 0.03  | 0.11  | -0.10 | -0.07                 | -0.15 | 0.73827 | 0.95910 | 0.28  | 0.77                       | 0.47  | 0.17  | 0.31  | -0.04 | 0.26                  |   |   |   |   |
| HILICpos_166.0726_1.46 | HILIC | pos        | 1.46            | 166.0726   |            | 4    |          | 0.28667 | 0.62026                                 | -0.23 | -0.08 | 0.23  | 0.23  | 0.18                  | 0.04  | 0.51875 | 0.90851 | 0.13  | 0.31                       | 0.24  | -0.10 | 0.30  | 0.17  | 0.06                  |   |   |   |   |
| HILICpos_166.0833_3.4  | HILIC | pos        | 3.4             | 166.0833   |            | 4    |          | 0.40511 | 0.71204                                 | -0.02 | 0.24  | 0.02  | 0.06  | 0.05                  | -0.33 | 0.99395 | 0.99904 | 0.06  | 0.15                       | 0.10  | -0.04 | 0.16  | -0.06 | 0.00                  |   |   |   |   |
| HILICpos_166.0863_2.59 | HILIC | pos        | 2.59            | 166.0863   |            | 4    |          | 0.26340 | 0.60057                                 | -0.19 | 0.05  | -0.03 | 0.37  | -0.08                 | -0.36 | 0.10503 | 0.58172 | -0.23 | -0.05                      | -0.22 | -0.10 | -0.45 | -0.31 | -0.13                 |   |   |   |   |
| RPpos_166.0863_1.32    | RP    | pos        | 1.32            | 166.0863   |            | 4    |          | 0.43695 | 0.73499                                 | -0.21 | 0.07  | 0.66  | 0.12  | -0.06                 | -1.06 | 0.00394 | 0.12997 | 0.82  | 0.30                       | 1.82  | 2.28  | 1.64  | 0.40  | -0.97                 |   |   |   |   |
| HILICpos_166.0864_3.07 | HILIC | pos        | 3.07            | 166.0864   |            | 4    |          | 0.00177 | 0.08523                                 | -0.38 | -0.17 | -0.23 | -0.06 | -0.19                 | -0.44 | 0.04917 | 0.44250 | -0.13 | -0.11                      | 0.01  | -0.09 | -0.25 | -0.26 | 0.01                  |   |   |   |   |
| HILICpos_166.1589_0.54 | HILIC | pos        | 0.54            | 166.1589   |            | 4    |          | 0.09010 | 0.41830                                 | -0.35 | -0.19 | -0.31 | 0.21  | -0.43                 | 0.33  | 0.86758 | 0.98025 | -0.18 | -0.12                      | -0.68 | -0.37 | -0.23 | 0.29  | 0.43                  |   |   |   |   |
| HILICneg_166.8334_0.4  | HILIC | neg        | 0.4             | 166.8334   |            | 4    |          | 0.85101 | 0.94398                                 | -0.09 | 0.01  | -0.14 | 0.23  | 0.21                  | 0.47  | 0.88529 | 0.98281 | -0.08 | -0.14                      | 0.32  | -0.08 | -0.26 | 0.28  | -0.67                 |   |   |   |   |
| HILICneg_166.9841_5.69 | HILIC | neg        | 5.69            | 166.9841   |            | 4    |          | 0.94374 | 0.97936                                 | 0.01  | 0.21  | 0.83  | 0.32  | 0.12                  | -0.82 | 0.06928 | 0.50432 | 0.45  | 0.23                       | 0.67  | 0.54  | 0.27  | 0.89  | -0.74                 |   |   |   |   |
| HILICneg_166.9842_5.85 | HILIC | neg        | 5.85            | 166.9842   |            | 4    |          | 0.97180 | 0.98962                                 | 0.05  | 0.39  | 0.60  | 0.12  | 0.22                  | -0.44 | 0.01051 | 0.21785 | 1.31  | 1.21                       | 1.31  | 1.56  | 1.07  | 0.47  | 0.19                  |   |   |   |   |
| HILICneg_167.0214_2.11 | HILIC | neg        | 2.11            | 167.0214   |            | 4    |          | 0.15955 | 0.50302                                 | -0.22 | 0.39  | 0.22  | -0.40 | 0.00                  | -0.24 | 0.28330 | 0.79200 | -0.30 | 0.29                       | -0.76 | 0.07  | 0.11  | -0.81 | 0.07                  |   |   |   |   |
| HILICneg_167.0215_4.89 | HILIC | neg        | 4.89            | 167.0215   |            | 4    |          | 0.93681 | 0.99516                                 | 0.06  | 0.50  | 0.48  | 0.05  | 0.14                  | 0.23  | 0.05237 | 0.45460 | -0.30 | 0.01                       | -0.51 | 0.01  | -0.64 | -0.54 | -0.55                 |   |   |   |   |
| HILICneg_167.0233_6.29 | HILIC | neg        | 6.29            | 167.0233   |            | 4    |          | 0.85514 | 0.94569                                 | 0.05  | 0.30  | 0.59  | 0.47  | -0.10                 | -0.90 | 0.00070 | 0.04527 | 0.69  | 0.52                       | 0.66  | 1.38  | 0.74  | 0.09  | -0.55                 |   |   |   |   |
| HILICpos_167.0334_0.37 | HILIC | pos        | 0.37            | 167.0334   |            | 4    |          | 0.79418 | 0.91999                                 | 0.12  | 0.30  | 0.49  | -0.16 | 0.58                  | 0.09  | 0.73001 | 0.95751 | -0.26 | 0.04                       | 0.80  | -0.39 | -0.18 | 1.02  | 0.35                  |   |   |   |   |
| RPneg_167.03523_2.018  | RP    | neg        | 2.018           | 167.0352   |            | 4    |          | 0.83394 | 0.93750                                 | 0.00  | 0.26  | 0.46  | 0.34  | -0.13                 | -0.48 | 0.51982 | 0.90875 | 0.04  | 0.31                       | 0.06  | 0.37  | -0.03 | -0.05 | -0.48                 |   |   |   |   |
| HILICneg_167.0353_0.87 | HILIC | neg        | 0.87            | 167.0353   |            | 4    |          | 0.78419 | 0.91532                                 | 0.10  | -0.02 | 0.81  | 0.54  | -0.16                 | -0.46 | 0.47477 | 0.89269 | 0.05  | 0.22                       | 0.19  | 0.25  | 0.07  | -0.28 | -0.36                 |   |   |   |   |
| RPneg_167.03539_5.53   | RP    | neg        | 5.53            | 167.0354   |            | 4    |          | 0.16483 | 0.51041                                 | 0.23  | 0.30  | 0.38  | 0.40  | 0.39                  | 0.55  | 0.41953 | 0.86739 | -0.25 | -0.56                      | -0.30 | -0.11 | -0.28 | -0.01 | -0.36                 |   |   |   |   |
| HILICneg_167.0354_0.95 | HILIC | neg        | 0.95            | 167.0354   |            | 4    |          | 0.90313 | 0.96425                                 | 0.04  | -0.06 | 0.36  | 0.31  | 0.09                  | -0.22 | 0.85287 | 0.97790 | 0.17  | 0.02                       | 0.47  | 0.36  | 0.26  | 0.12  | -0.38                 |   |   |   |   |
| RPneg_167.03554_1.323  | RP    | neg        | 1.323           | 167.0355   |            | 4    |          | 0.49963 | 0.77316                                 | 0.04  | 0.01  | 0.11  | 0.08  | 0.27                  | 0.11  | 0.87673 | 0.98219 | -0.06 | -0.14                      | -0.02 | -0.12 | 0.01  | 0.02  | -0.25                 |   |   |   |   |
| RPneg_167.03558_5.007  | RP    | neg        | 5.007           | 167.0356   |            | 4    |          | 0.82354 | 0.93316                                 | 0.02  | 0.04  | 0.22  | 0.15  | 0.18                  | 0.17  | 0.05734 | 0.47112 | -0.62 | -0.67                      | -0.69 | -0.60 | -0.60 | -0.54 | -0.45                 |   |   |   |   |
| HILICpos_167.0488_5.33 | HILIC | pos        | 5.33            | 167.0488   |            | 4    |          | 0.48913 | 0.77061                                 | 0.19  | 0.59  | 0.47  | 0.16  | 0.45                  | 0.66  | 0.05997 | 0.48016 | 0.11  | -0.10                      | 0.05  | 0.28  | 0.27  | 0.36  | -0.71                 |   |   |   |   |
| HILICpos_167.0926_1.15 | HILIC | pos        | 1.15            | 167.0926   |            | 4    |          | 0.36934 | 0.68578                                 | 0.23  | 0.06  | 0.36  | 0.30  | 0.25                  | 0.56  | 0.95624 | 0.99456 | -0.04 | -0.07                      | -0.01 | -0.05 | -0.02 | -0.03 | -0.14                 |   |   |   |   |
| RPneg_167.10834_7.875  | RP    | neg        | 7.875           | 167.1083   |            | 4    |          | 0.03378 | 0.30413                                 | 0.51  | 0.11  | 1.02  | 0.71  | 0.48                  | 0.02  | 0.00004 | 0.00615 | 0.76  | 0.17                       | 0.57  | 1.16  | 0.85  | 0.91  | 0.05                  |   |   |   |   |
| RPneg_167.6794_12.934  | RP    | neg        | 12.934          | 167.6794   |            | 4    |          | 0.23716 | 0.57874                                 | -0.31 | -0.08 | 0.05  | -0.60 | -0.01                 | -0.70 | 0.65332 | 0.94010 | -0.01 | -0.10                      | 0.70  | -0.17 | -0.02 | -0.10 | -0.33                 |   |   |   |   |
| HILICneg_167.8368_1.39 | HILIC | neg        | 1.39            | 167.8368   |            | 4    |          | 0.90399 | 0.93465                                 | 0.07  | 0.13  | -0.06 | 0.37  | 0.57                  | 0.27  | 0.15032 | 0.65536 | 0.36  | 0.28                       | 0.10  | 0.35  | 0.17  | 0.46  | 0.78                  |   |   |   |   |
| HILICneg_167.8372_1.1  | HILIC | neg        | 1.1             | 167.8372   |            | 4    |          | 0.03789 | 0.29464                                 | -0.66 | -0.18 | -0.05 | 0.03  | -0.17                 | -0.27 | 0.45893 | 0.89479 | -0.22 | -0.23                      | -0.58 | 0.00  | -0.29 | 0.04  | 0.17                  |   |   |   |   |
| HILICneg_167.8372_2.67 | HILIC | neg        | 2.67            | 167.8373   |            | 4    |          | 0.32928 | 0.63349                                 | 0.13  | 0.00  | -0.14 | 0.15  | 0.35                  | 0.84  | 0.34675 | 0.82974 | -0.01 | -0.16                      | 0.03  | 0.04  | -0.22 | 0.22  | 0.00                  |   |   |   |   |
| HILICneg_167.8373_0.89 | HILIC | neg        | 0.89            | 167.8373   |            | 4    |          | 0.00701 | 0.16510                                 | -0.68 | -0.11 | -0.24 | -0.54 | -0.14                 | -0.18 | 0.57348 | 0.92255 | -0.15 | 0.12                       | -0.11 | 1.10  | -0.09 | 0.09  | 0.67                  |   |   |   |   |
| HILICneg_167.8373_0.89 | HILIC | neg        | 0.89            | 167.8373   |            | 4    |          | 0.00265 | 0.10564                                 | -0.51 | 0.04  | -0.04 | -0.37 | -0.27                 | -0.34 | 0.12604 | 0.61762 | -0.80 | -0.53                      | -0.35 | -0.53 | -0.68 | 0.13  | 0.92                  |   |   |   |   |
| RPneg_167.92851_15.512 | RP    | neg        | 15.512          | 167.9285   |            | 4    |          | 0.11976 | 0.45552                                 | -0.45 | -0.31 | 0.61  | -0.51 | 0.26                  | -0.07 | 0.37454 | 0.84348 | -0.37 | -0.20                      | -0.49 | 0.29  | -0.06 | 0.02  | -0.55                 |   |   |   |   |
| HILICneg_167.9974_6.63 | HILIC | neg        | 6.63            | 167.9974   |            | 4    |          | 0.10801 | 0.44140                                 | -0.33 | 0.06  | -0.47 | -0.29 | -0.20                 | -0.58 | 0.04201 | 0.41487 | -0.41 | -0.28                      | -0.36 | -0.36 | -0.45 | -0.55 | 0.14                  |   |   |   |   |
| HILICpos_168.0007_5.11 | HILIC | pos        | 5.11            | 168.0007   |            | 4    |          | 0.51453 | 0.78469                                 | 0.22  | 0.29  | 0.82  | 0.13  | 0.39                  | 0.83  | 0.66941 | 0.94509 | 0.05  | -0.73                      | -0.19 | 0.10  | 0.23  | 0.12  | 0.91                  |   |   |   |   |
| HILICneg_168.0283_6.41 | HILIC | neg        | 6.41            | 168.0283   |            | 4    |          | 0.17761 | 0.52336                                 | -0.31 | -0.15 | -0.10 | -0.14 | -0.42                 | -0.16 | 0.00347 | 0.11987 | -0.74 | -0.92                      | -0.96 | -0.36 | -0.71 | -0.67 | -0.18                 |   |   |   |   |
| RPneg_168.03033_2.243  | RP    | neg        | 2.243           | 168.0303   |            | 4    |          | 0.43940 | 0.73653                                 | 0.26  | 0.22  | 0.53  | 0.73  | 0.22                  | -0.11 | 0.12407 | 0.61426 | 0.81  | 1.23                       | 0.78  | 0.78  | 1.03  | 0.81  | -0.05                 |   |   |   |   |
| HILICpos_168.0305_1.29 | HILIC | pos        | 1.29            | 168.0305   |            | 4    |          | 0.37898 | 0.69373                                 | 0.26  | 0.25  | 0.50  | 0.73  | 0.21                  | -0.04 | 0.10413 | 0.58024 | 0.78  | 1.28                       | 0.75  | 0.89  | 0.99  | 0.67  | -0.09                 |   |   |   |   |
| HILICpos_168.0491_6.11 | HILIC | pos        | 6.11            | 168.0491   |            | 4    |          | 0.54031 | 0.79830                                 | -0.07 | 0.20  | 0.16  | 0.02  | 0.01                  | -0.88 | 0.28482 | 0.79289 | 0.54  | 0.52                       | 0.91  | 1.15  | 0.78  | -0.07 | -0.01                 |   |   |   |   |
| HILICneg_168.0784_1.89 | HILIC | neg        | 1.89            | 168.0784   |            | 4    |          | 0.79017 | 0.91807                                 | 0.08  | 0.17  | 0.24  | 0.15  | 0.21                  | -0.35 | 0.72601 | 0.95609 | 0.44  | 0.20                       | 0.29  | 0.85  | 0.72  | 0.29  | 0.31                  |   |   |   |   |
| HILICpos_168.1018_0.47 | HILIC | pos        | 0.47            | 168.1018   |            | 4    |          | 0.79868 | 0.92221                                 | -0.02 | 0.03  | -0.04 | 0.09  | 0.04                  | 0.0   |         |         |       |                            |       |       |       |       |                       |   |   |   |   |



| Feature_ID             | Mode  | Ionization | Average_Rt.min. | Average_Mz | Metabolite | MSMS | ID_Level | HMDB_ID | IV-Alcohol self-administration (IV-ASA) |       |       |        |       |       |                       |         |         |         |       |       | IV-Alcohol clamp (IV-AC)   |       |       |       |   |   |                       |   |   |       |   |   |
|------------------------|-------|------------|-----------------|------------|------------|------|----------|---------|-----------------------------------------|-------|-------|--------|-------|-------|-----------------------|---------|---------|---------|-------|-------|----------------------------|-------|-------|-------|---|---|-----------------------|---|---|-------|---|---|
|                        |       |            |                 |            |            |      |          |         | Area Under the Curve (AUC)              |       |       |        |       |       | IV-Ghrelin or Placebo |         |         |         |       |       | Area Under the Curve (AUC) |       |       |       |   |   | IV-Ghrelin or Placebo |   |   |       |   |   |
|                        |       |            |                 |            |            |      |          |         | Baseline                                |       |       | IV-ASA |       |       | Baseline              |         |         | Post-LD |       |       | Baseline                   |       |       | IV-AC |   |   | Baseline              |   |   | IV-AC |   |   |
|                        |       |            |                 |            |            |      |          |         | p                                       | q     | d     | d      | d     | d     | d                     | d       | d       | d       | d     | d     | p                          | q     | d     | d     | d | d | d                     | d | d | d     | d | d |
| HILICpos_170.0323_5.57 | HILIC | pos        | 5.57            | 170.0323   |            | 4    |          | 0.21012 | 0.55328                                 | -0.30 | -0.08 | 0.16   | -0.25 | -0.27 | -0.22                 | 0.08454 | 0.54063 | -0.11   | -0.03 | -0.03 | 0.14                       | -0.12 | -0.21 | -0.55 |   |   |                       |   |   |       |   |   |
| HILICneg_170.0464_1    | HILIC | neg        | 1               | 170.0464   |            | 4    |          | 0.32594 | 0.65149                                 | 0.32  | 0.50  | 0.71   | 0.22  | 0.51  | -0.21                 | 0.46608 | 0.88791 | 0.41    | 0.64  | 0.56  | 0.75                       | 0.29  | 0.49  | -0.16 |   |   |                       |   |   |       |   |   |
| HILICpos_170.0576_2.95 | HILIC | pos        | 2.95            | 170.0576   |            | 4    |          | 0.80617 | 0.92563                                 | -0.09 | 0.01  | 0.08   | -0.01 | 0.00  | -0.14                 | 0.85042 | 0.97755 | 0.01    | -0.04 | 0.05  | 0.05                       | -0.07 | 0.02  | 0.05  |   |   |                       |   |   |       |   |   |
| RPpos_170.06_2.82      | RP    | pos        | 2.82            | 170.0600   |            | 4    |          | 0.09554 | 0.42567                                 | -0.25 | 0.08  | 0.49   | 0.07  | -0.73 | -0.65                 | 0.81873 | 0.97328 | -0.04   | -0.09 | 0.08  | 0.23                       | -0.03 | -0.17 | -0.33 |   |   |                       |   |   |       |   |   |
| HILICpos_170.0602_4.07 | HILIC | pos        | 4.07            | 170.0602   |            | 4    |          | 0.13839 | 0.47792                                 | -0.35 | 0.52  | -0.74  | -0.08 | -0.73 | -0.83                 | 0.89508 | 0.98465 | -0.03   | -0.19 | 0.15  | 0.40                       | 0.08  | -0.39 | -0.38 |   |   |                       |   |   |       |   |   |
| RPneg_170.0825_4.47    | RP    | neg        | 4.47            | 170.0826   |            | 4    |          | 0.02740 | 0.23842                                 | 0.48  | -0.20 | 0.86   | 0.55  | 0.66  | 0.12                  | 0.36334 | 0.83887 | 0.08    | 0.06  | 0.31  | 0.17                       | 0.06  | -0.06 | 0.10  |   |   |                       |   |   |       |   |   |
| HILICpos_170.1175_4.25 | HILIC | pos        | 4.25            | 170.1175   |            | 4    |          | 0.24299 | 0.58402                                 | -0.23 | 0.00  | -0.14  | 0.23  | 0.15  | -0.27                 | 0.81263 | 0.97170 | -0.07   | -0.18 | -0.03 | -0.20                      | -0.12 | 0.20  | 0.05  |   |   |                       |   |   |       |   |   |
| HILICpos_170.1178_4.69 | HILIC | pos        | 4.69            | 170.1178   |            | 4    |          | 0.58501 | 0.82137                                 | -0.17 | -0.07 | -0.08  | -0.05 | -0.17 | -0.12                 | 0.01166 | 0.23023 | -0.68   | -0.75 | -0.68 | -0.62                      | -0.71 | -0.71 | -0.68 |   |   |                       |   |   |       |   |   |
| HILICpos_170.1288_0.96 | HILIC | pos        | 0.96            | 170.1288   |            | 4    |          | 0.52276 | 0.78923                                 | -0.22 | 0.15  | 0.44   | 0.29  | 0.19  | 0.01                  | 0.99824 | 0.99953 | -0.02   | 0.97  | -0.47 | 0.01                       | 0.11  | -0.12 | -0.72 |   |   |                       |   |   |       |   |   |
| HILICpos_170.1539_0.56 | HILIC | pos        | 0.56            | 170.1539   |            | 4    |          | 0.00002 | 0.00843                                 | -0.87 | -0.19 | -0.52  | -0.39 | -1.38 | 0.37                  | 0.07063 | 0.50856 | -0.76   | -0.55 | -1.45 | -1.29                      | -0.66 | -0.30 | 0.01  |   |   |                       |   |   |       |   |   |
| RPpos_170.1543_3.56    | RP    | pos        | 3.56            | 170.1543   |            | 4    |          | 0.54905 | 0.80347                                 | 0.05  | 0.07  | 0.10   | -0.07 | 0.21  | 0.57                  | 0.10456 | 0.58038 | -0.19   | -0.22 | -0.14 | -0.22                      | -0.20 | -0.10 | -0.25 |   |   |                       |   |   |       |   |   |
| HILICpos_170.5303_0.94 | HILIC | pos        | 0.94            | 170.5303   |            | 4    |          | 0.25827 | 0.59630                                 | 0.19  | 0.17  | 0.39   | 0.40  | 0.28  | -0.35                 | 0.00304 | 0.11096 | -0.43   | -0.51 | -0.53 | -0.42                      | -0.24 | -0.37 | -0.58 |   |   |                       |   |   |       |   |   |
| HILICneg_170.8334_4.89 | HILIC | neg        | 4.89            | 170.8334   |            | 4    |          | 0.45118 | 0.74468                                 | -0.25 | -0.66 | 0.06   | 0.22  | 0.18  | 0.07                  | 0.15278 | 0.65833 | 0.15    | 0.23  | 0.10  | 0.14                       | -0.13 | 0.33  | 0.53  |   |   |                       |   |   |       |   |   |
| RPneg_170.83348_13.795 | RP    | neg        | 13.795          | 170.8335   |            | 4    |          | 0.46157 | 0.75219                                 | -0.26 | -0.34 | -0.35  | 0.46  | -0.44 | 0.12                  | 0.51196 | 0.90599 | -0.23   | -0.43 | -0.12 | -0.19                      | -0.50 | -0.01 | 0.06  |   |   |                       |   |   |       |   |   |
| RPneg_170.83348_11.602 | RP    | neg        | 11.602          | 170.8335   |            | 4    |          | 0.12476 | 0.46025                                 | -0.35 | 0.11  | -0.08  | 0.02  | -0.18 | -0.93                 | 0.54432 | 0.91534 | 0.16    | 0.40  | 0.32  | 0.31                       | -0.04 | 0.00  | 0.05  |   |   |                       |   |   |       |   |   |
| HILICneg_170.8335_6.35 | HILIC | neg        | 6.35            | 170.8335   |            | 4    |          | 0.04697 | 0.33960                                 | -0.58 | -0.58 | -0.46  | 0.03  | -0.18 | -0.74                 | 0.06718 | 0.49979 | -0.13   | 0.07  | -0.08 | -0.77                      | -0.18 | 0.61  | -0.54 |   |   |                       |   |   |       |   |   |
| RPneg_170.83357_8.172  | RP    | neg        | 8.172           | 170.8336   |            | 4    |          | 0.00752 | 0.17009                                 | -0.44 | 0.04  | -0.30  | -0.22 | -0.25 | -0.15                 | 0.90180 | 0.98571 | 0.03    | 0.02  | 0.13  | 0.02                       | 0.12  | -0.16 | 0.00  |   |   |                       |   |   |       |   |   |
| HILICneg_170.8336_6.26 | HILIC | neg        | 6.26            | 170.8336   |            | 4    |          | 0.00075 | 0.05430                                 | -0.65 | -0.39 | -0.57  | -0.36 | -0.16 | 0.01                  | 0.62389 | 0.93348 | -0.07   | -0.11 | -0.04 | -0.19                      | -0.11 | -0.05 | 0.11  |   |   |                       |   |   |       |   |   |
| HILICneg_170.8336_0.39 | HILIC | neg        | 0.39            | 170.8336   |            | 4    |          | 0.13831 | 0.47792                                 | -0.35 | 0.52  | -0.74  | -0.08 | -0.73 | -0.83                 | 0.26874 | 0.78099 | -0.31   | 0.12  | 0.03  | -0.46                      | 0.03  | -0.33 | -0.51 |   |   |                       |   |   |       |   |   |
| HILICneg_170.8336_7.39 | HILIC | neg        | 7.39            | 170.8336   |            | 4    |          | 0.11386 | 0.44665                                 | -0.52 | -0.09 | 0.06   | -0.68 | 0.07  | -0.23                 | 0.24527 | 0.76114 | 0.16    | 0.42  | 0.31  | 0.01                       | 0.58  | 0.18  | 0.29  |   |   |                       |   |   |       |   |   |
| HILICneg_170.8336_0.79 | HILIC | neg        | 0.79            | 170.8336   |            | 4    |          | 0.14235 | 0.48216                                 | -0.40 | 0.05  | 0.05   | 0.50  | 0.23  | -0.18                 | 0.36233 | 0.83661 | 0.32    | 0.30  | -0.04 | 0.01                       | 0.77  | 0.21  | 1.20  |   |   |                       |   |   |       |   |   |
| HILICneg_170.8337_7.04 | HILIC | neg        | 7.04            | 170.8337   |            | 4    |          | 0.02238 | 0.26651                                 | -0.52 | -0.36 | -0.13  | -0.49 | -0.33 | 0.48                  | 0.28836 | 0.79407 | -0.30   | -0.26 | -0.10 | -0.63                      | -0.83 | -0.05 | 0.50  |   |   |                       |   |   |       |   |   |
| HILICneg_170.8337_5.41 | HILIC | neg        | 5.41            | 170.8337   |            | 4    |          | 0.18006 | 0.52549                                 | -0.43 | 0.15  | 0.07   | -0.10 | -0.09 | -0.05                 | 0.15477 | 0.66099 | 0.06    | 0.10  | 0.20  | -0.30                      | 0.22  | 0.32  | -0.69 |   |   |                       |   |   |       |   |   |
| RPneg_170.83379_14.175 | RP    | neg        | 14.175          | 170.8338   |            | 4    |          | 0.22858 | 0.57032                                 | -0.42 | 0.25  | -0.47  | 0.35  | -0.27 | -0.44                 | 0.07978 | 0.52971 | -0.15   | -0.36 | -0.22 | -0.10                      | -0.07 | -0.18 | 0.17  |   |   |                       |   |   |       |   |   |
| HILICneg_170.8338_0.52 | HILIC | neg        | 0.52            | 170.8338   |            | 4    |          | 0.55110 | 0.80420                                 | -0.06 | -0.13 | 0.32   | 0.21  | 0.06  | -0.35                 | 0.08739 | 0.54647 | -0.29   | -0.37 | -0.16 | -0.40                      | -0.12 | -0.46 | -0.35 |   |   |                       |   |   |       |   |   |
| RPneg_170.8338_10.204  | RP    | neg        | 10.204          | 170.8338   |            | 4    |          | 0.65320 | 0.85419                                 | -0.17 | 0.10  | 0.23   | 0.32  | 0.34  | 0.53                  | 0.36940 | 0.84019 | -0.21   | -0.16 | 0.01  | -0.12                      | 0.25  | -0.92 | -0.06 |   |   |                       |   |   |       |   |   |
| RPneg_170.83382_10.09  | RP    | neg        | 10.09           | 170.8338   |            | 4    |          | 0.59870 | 0.82785                                 | -0.24 | -0.10 | 0.49   | 0.01  | 0.18  | 0.24                  | 0.26245 | 0.77484 | 0.39    | -0.37 | 2.01  | -0.22                      | 0.76  | -0.03 | -0.62 |   |   |                       |   |   |       |   |   |
| RPneg_170.83382_10.798 | RP    | neg        | 10.798          | 170.8338   |            | 4    |          | 0.73138 | 0.89098                                 | -0.12 | 0.09  | 0.07   | 0.20  | 0.04  | 0.07                  | 0.46989 | 0.89010 | 0.19    | 1.55  | -0.51 | -0.87                      | -0.48 | 0.79  | 0.18  |   |   |                       |   |   |       |   |   |
| RPneg_170.83389_10.524 | RP    | neg        | 10.524          | 170.8339   |            | 4    |          | 0.87497 | 0.95313                                 | -0.03 | 0.11  | 0.16   | 0.29  | 0.33  | 0.31                  | 0.44387 | 0.87978 | 0.05    | 0.03  | 0.10  | 0.06                       | -0.01 | 0.00  | 0.13  |   |   |                       |   |   |       |   |   |
| HILICneg_170.834_4.12  | HILIC | neg        | 4.12            | 170.8340   |            | 4    |          | 0.60946 | 0.83316                                 | -0.25 | -0.17 | 0.31   | 0.33  | -0.58 | -0.85                 | 0.68772 | 0.94932 | 0.20    | 0.08  | -0.05 | 0.49                       | 0.05  | -0.14 | -0.12 |   |   |                       |   |   |       |   |   |
| HILICneg_171.0086_1.42 | HILIC | neg        | 1.42            | 171.0086   |            | 4    |          | 0.37555 | 0.69102                                 | -0.26 | -0.10 | 0.30   | -0.44 | -0.10 | 0.55                  | 0.20726 | 0.72378 | 0.58    | 0.08  | 0.25  | 1.05                       | 0.70  | 1.07  | -0.24 |   |   |                       |   |   |       |   |   |
| RPneg_171.02776_1.36   | RP    | neg        | 1.36            | 171.0278   |            | 4    |          | 0.20471 | 0.54871                                 | 0.32  | 0.20  | 0.12   | 0.27  | 0.14  | -0.05                 | 0.38944 | 0.85129 | 1.27    | 0.17  | 0.58  | 1.86                       | 0.50  | 0.69  | 0.70  |   |   |                       |   |   |       |   |   |
| RPneg_171.0278_1.053   | RP    | neg        | 1.053           | 171.0278   |            | 4    |          | 0.52139 | 0.78877                                 | 0.34  | 0.17  | 0.34   | 0.09  | 0.44  | -0.02                 | 0.16855 | 0.67993 | 0.56    | 0.01  | 0.34  | 0.27                       | 0.68  | -0.05 | 1.11  |   |   |                       |   |   |       |   |   |
| RPneg_171.0281_1.595   | RP    | neg        | 1.595           | 171.0281   |            | 4    |          | 0.71117 | 0.88209                                 | 0.07  | 0.09  | 0.13   | 0.17  | 0.45  | 0.02                  | 0.17336 | 0.68703 | 0.46    | 0.23  | 0.24  | 0.27                       | 0.35  | 0.49  | 1.25  |   |   |                       |   |   |       |   |   |
| RPneg_171.06654_5.162  | RP    | neg        | 5.162           | 171.0665   |            | 4    |          | 0.03969 | 0.31975                                 | -0.53 | -0.05 | 0.12   | 0.01  | -0.56 | -0.04                 | 0.78214 | 0.96597 | -0.01   | -0.41 | 0.20  | 1.46                       | 0.20  | 0.06  | 0.20  |   |   |                       |   |   |       |   |   |
| HILICneg_171.0667_0.96 | HILIC | neg        | 0.96            | 171.0667   |            | 4    |          | 0.69213 | 0.87353                                 | 0.11  | 0.52  | 0.40   | 0.28  | 0.34  | 0.03                  | 0.78751 | 0.96713 | -0.03   | 0.12  | 0.05  | -0.12                      | 0.06  | -0.09 | -0.24 |   |   |                       |   |   |       |   |   |
| HILICneg_171.0667_4.33 | HILIC | neg        | 4.33            | 171.0667   |            | 4    |          | 0.77913 | 0.91338                                 | -0.05 | 0.17  | 0.82   | 0.19  | -0.10 | -0.11                 | 0.00704 | 0.17688 | 0.42    | 0.32  | 0.60  | 0.80                       | 0.54  | 0.12  | -0.47 |   |   |                       |   |   |       |   |   |
| HILICneg_171.0668_5.69 | HILIC | neg        | 5.69            | 171.0668   |            | 4    |          | 0.80658 | 0.92567                                 | 0.03  | 0.07  | 0.49   | 0.71  | -0.33 | -0.12                 | 0.17516 | 0.68982 | 0.43    | 0.26  | 0.67  | 0.32                       | 0.66  | 0.58  | -0.51 |   |   |                       |   |   |       |   |   |
| HILICneg_171.0669_4.91 | HILIC | neg        | 4.91            | 171.0669   |            | 4    |          | 0.71971 | 0.88585                                 | 0.14  | 0.56  | 0.90   | 0.22  | 0.20  | -0.18                 | 0.20842 | 0.72428 | 0.37    | 0.47  | 0.16  | 0.89                       | 1.00  | -0.40 | -0.81 |   |   |                       |   |   |       |   |   |
| HILICneg_171.0669_4.21 | HILIC | neg        | 4.21            | 171.0669   |            | 4    |          | 0.02400 | 0.27334                                 | -0.48 | 0.17  | 0.41   | -0.16 | -1.23 | -1.15                 | 0.48398 | 0.89667 | 0.18    | 0.23  | 0.37  | 0.17                       | 0.88  | -0.13 | -0.53 |   |   |                       |   |   |       |   |   |
| HILICpos_171.076_6.13  | HILIC | pos        | 6.13            | 171.0760   |            | 4    |          | 0.68763 | 0.87124                                 | 0.05  | 0.17  | 0.57   | 0.17  | 0.19  | -0.15                 | 0.00702 | 0.17677 | 0.39    | 0.44  | 0.41  | 0.63                       | 0.48  | 0.31  | -0.05 |   |   |                       |   |   |       |   |   |
| RPneg_171.10286_6.547  | RP    | neg        | 6.547           | 171.1029   |            | 4    |          | 0.66162 | 0.85808                                 | -0.18 | 0.63  | 0.89   | -0.08 | 0.28  | 0.00                  | 0.06081 | 0.48165 | -0.39   | -0.26 | -0.77 | -0.34                      | 0.02  | -0.08 | -0.01 |   |   |                       |   |   |       |   |   |
| RPneg_171.13896_7.257  | RP    | neg        | 7.257           | 171.1390   |            | 4    |          | 0.17866 | 0.52425                                 | 0.65  | 0.39  | 0.99   | 0.63  | 0.57  | -0.08                 | 0.06365 | 0.48965 | 0.85    | 0.92  | 0.90  | 0.74                       | 0.27  | 0.69  | -0.04 |   |   |                       |   |   |       |   |   |
| HILICpos_171.1492_1.03 | HILIC | pos        | 1.03            | 171.1492   |            | 4    |          | 0.24311 | 0.58415                                 | 0.45  | 0.18  | -0.13  | 0.29  | 1.21  | -0.06                 | 0.64690 | 0.93869 | 0.20    | -0.11 | -0.01 | 0.79                       | 0.98  | 1.12  | -0.45 |   |   |                       |   |   |       |   |   |
| RPneg_171.17788_10.879 | RP    | neg        | 10.879          | 171.1779   |            | 4    |          | 0.04    |                                         |       |       |        |       |       |                       |         |         |         |       |       |                            |       |       |       |   |   |                       |   |   |       |   |   |

| Feature_ID             | Mode  | Ionization | Average_Rt.min. | Average_Mz | Metabolite | MSMS | ID_Level | HMDB_ID | IV-Alcohol self-administration (IV-ASA) |         |       |                       |       |       |        |       |         |                            | IV-Alcohol clamp (IV-AC) |       |                       |       |       |         |       |   |       |   |   |
|------------------------|-------|------------|-----------------|------------|------------|------|----------|---------|-----------------------------------------|---------|-------|-----------------------|-------|-------|--------|-------|---------|----------------------------|--------------------------|-------|-----------------------|-------|-------|---------|-------|---|-------|---|---|
|                        |       |            |                 |            |            |      |          |         | Area Under the Curve (AUC)              |         |       | IV-Ghrelin or Placebo |       |       |        |       |         | Area Under the Curve (AUC) |                          |       | IV-Ghrelin or Placebo |       |       |         |       |   |       |   |   |
|                        |       |            |                 |            |            |      |          |         | p                                       | q       | d     | Baseline              |       |       | IV-ASA |       |         | p                          | q                        | d     | Baseline              |       |       | Post-LD |       |   | IV-AC |   |   |
|                        |       |            |                 |            |            |      |          |         |                                         |         |       | d                     | d     | d     | d      | d     | d       |                            |                          |       | d                     | d     | d     | d       | d     | d | d     | d | d |
| HILICneg_172.9581_4.36 | HILIC | neg        | 4.36            | 172.9581   |            |      | 4        |         | 0.24709                                 | 0.58731 | -0.33 | -0.15                 | 0.09  | 0.44  | -0.17  | -0.15 | 0.56290 | 0.92016                    | -0.16                    | -0.15 | -0.63                 | 0.57  | -0.04 | -0.57   | 0.03  |   |       |   |   |
| HILICneg_172.9583_5.42 | HILIC | neg        | 5.42            | 172.9583   |            |      | 4        |         | 0.43361                                 | 0.73240 | -0.30 | -0.50                 | -0.31 | 0.15  | 0.00   | 0.46  | 0.16876 | 0.68028                    | -0.59                    | -0.20 | -0.46                 | 0.32  | -1.26 | -0.63   | 0.56  |   |       |   |   |
| HILICneg_172.9583_0.96 | HILIC | neg        | 0.96            | 172.9583   |            |      | 4        |         | 0.80126                                 | 0.92334 | -0.10 | 0.13                  | 0.16  | 0.21  | 0.04   | -0.01 | 0.73710 | 0.95879                    | -0.02                    | 0.18  | -0.01                 | 0.01  | -0.05 | -0.12   | 0.05  |   |       |   |   |
| HILICneg_172.9584_5.96 | HILIC | neg        | 5.96            | 172.9584   |            |      | 4        |         | 0.05198                                 | 0.34974 | -0.44 | -0.15                 | -0.36 | 0.18  | -0.48  | 0.23  | 0.57505 | 0.92302                    | -0.06                    | 0.17  | 0.03                  | -0.13 | -0.12 | -0.21   | 0.14  |   |       |   |   |
| HILICneg_172.9585_4.93 | HILIC | neg        | 4.93            | 172.9585   |            |      | 4        |         | 0.15268                                 | 0.49511 | -0.32 | -0.03                 | -0.10 | 0.13  | 0.14   | -0.55 | 0.05218 | 0.45455                    | 0.32                     | 0.29  | 0.40                  | 0.62  | -0.10 | 0.53    | -0.18 |   |       |   |   |
| RPneg_172.9914_2.43    | RP    | neg        | 2.43            | 172.9914   |            |      | 4        |         | 0.57481                                 | 0.81927 | 0.04  | 0.05                  | -0.06 | 0.17  | -0.15  | 0.04  | 0.07461 | 0.51785                    | 0.37                     | 0.25  | 0.25                  | 0.35  | 0.21  | 0.32    | 0.35  |   |       |   |   |
| RPneg_172.99144_2.278  | RP    | neg        | 2.278           | 172.9914   |            |      | 4        |         | 0.81013                                 | 0.92724 | -0.11 | -0.10                 | -0.02 | -0.21 | 0.04   | 0.04  | 0.09999 | 0.57187                    | 0.31                     | 0.14  | 0.26                  | 0.37  | 0.47  | 0.18    | 0.34  |   |       |   |   |
| HILICneg_172.9916_0.49 | HILIC | neg        | 0.49            | 172.9916   |            |      | 4        |         | 0.43114                                 | 0.73094 | -0.21 | -0.14                 | -0.13 | -0.24 | -0.17  | 0.01  | 0.04600 | 0.43053                    | 0.42                     | 0.39  | 0.44                  | 0.39  | 0.42  | 0.38    | 0.51  |   |       |   |   |
| HILICneg_173.0055_1.41 | HILIC | neg        | 1.41            | 173.0055   |            |      | 4        |         | 0.44236                                 | 0.73848 | -0.22 | 0.03                  | 0.38  | -0.37 | -0.11  | 0.46  | 0.26133 | 0.77484                    | 0.59                     | 0.03  | 0.24                  | 0.81  | 0.59  | 1.36    | -0.21 |   |       |   |   |
| HILICpos_173.0298_5.7  | HILIC | pos        | 5.7             | 173.0298   |            |      | 4        |         | 0.40454                                 | 0.71194 | -0.03 | 0.09                  | 0.18  | 0.07  | 0.09   | 0.15  | 0.20581 | 0.72174                    | -0.22                    | -0.19 | -0.18                 | -0.14 | -0.21 | -0.27   | -0.31 |   |       |   |   |
| RPneg_173.0453_11.19   | RP    | neg        | 11.19           | 173.0453   |            |      | 4        |         | 0.03643                                 | 0.31135 | 1.24  | 0.09                  | 0.00  | 0.90  | 2.97   | 0.13  | 0.83037 | 0.97467                    | 0.01                     | 0.15  | 0.49                  | 0.31  | -0.54 | -0.57   | 0.07  |   |       |   |   |
| HILICneg_173.0458_2.33 | HILIC | neg        | 2.33            | 173.0458   |            |      | 4        |         | 0.33950                                 | 0.66217 | -0.04 | 0.14                  | 0.25  | 0.12  | 0.11   | 0.20  | 0.59574 | 0.92780                    | -0.02                    | -0.28 | 0.35                  | -0.14 | 0.02  | -0.01   | -0.32 |   |       |   |   |
| HILICpos_173.0783_1.42 | HILIC | pos        | 1.42            | 173.0783   |            |      | 4        |         | 0.50495                                 | 0.77931 | 0.07  | 0.30                  | 0.27  | 0.45  | 0.22   | 0.09  | 0.03370 | 0.37697                    | -0.37                    | 0.95  | -0.62                 | -0.42 | -0.36 | -0.19   | 0.19  |   |       |   |   |
| HILICpos_173.0921_5.8  | HILIC | pos        | 5.8             | 173.0921   |            |      | 4        |         | 0.55473                                 | 0.80652 | 0.22  | 0.37                  | 0.76  | 0.37  | 0.02   | -0.46 | 0.00891 | 0.20091                    | 0.97                     | 0.68  | 0.97                  | 1.13  | 1.10  | 0.90    | 0.16  |   |       |   |   |
| HILICneg_173.0932_5.88 | HILIC | neg        | 5.88            | 173.0932   |            |      | 4        |         | 0.27428                                 | 0.60955 | 0.16  | 0.31                  | 0.59  | 0.37  | 0.17   | -0.33 | 0.00159 | 0.07599                    | 0.45                     | 0.21  | 0.39                  | 0.72  | 0.53  | 0.46    | -0.06 |   |       |   |   |
| RPneg_173.11847_6.767  | RP    | neg        | 6.767           | 173.1185   |            |      | 4        |         | 0.50215                                 | 0.77746 | -0.21 | 0.44                  | 0.98  | 0.17  | 0.05   | 0.47  | 0.73546 | 0.95858                    | -0.11                    | 0.08  | 0.49                  | -0.32 | 0.36  | -0.01   | -0.48 |   |       |   |   |
| RPneg_173.1185_6.882   | RP    | neg        | 6.882           | 173.1185   |            |      | 4        |         | 0.18066                                 | 0.52623 | -0.36 | 0.29                  | 0.31  | 0.35  | 0.13   | -0.36 | 0.62280 | 0.93343                    | -0.28                    | 0.25  | -0.14                 | -0.59 | -0.11 | 0.00    | -0.21 |   |       |   |   |
| RPneg_173.1185_7.186   | RP    | neg        | 7.186           | 173.1185   |            |      | 4        |         | 0.66683                                 | 0.86056 | -0.03 | 0.14                  | 0.29  | 0.19  | 0.22   | 0.35  | 0.57364 | 0.92255                    | 0.01                     | -0.06 | 0.04                  | 0.24  | 0.22  | -0.35   | 0.19  |   |       |   |   |
| RPneg_173.1185_7.008   | RP    | neg        | 7.008           | 173.1185   |            |      | 4        |         | 0.38474                                 | 0.69734 | -0.20 | 0.11                  | 0.03  | 0.17  | 0.37   | -0.32 | 0.14710 | 0.65072                    | 0.59                     | 0.57  | 0.26                  | 1.88  | 0.34  | 0.34    | 0.64  |   |       |   |   |
| HILICneg_173.1186_0.46 | HILIC | neg        | 0.46            | 173.1186   |            |      | 4        |         | 0.40550                                 | 0.71224 | 0.24  | 0.04                  | 0.75  | 0.38  | 0.80   | -0.18 | 0.39765 | 0.85677                    | 0.25                     | 0.15  | 0.62                  | 0.40  | 0.45  | -0.34   | 0.09  |   |       |   |   |
| RPneg_173.1186_6.06    | RP    | neg        | 6.06            | 173.1187   |            |      | 4        |         | 0.46183                                 | 0.75239 | 0.23  | -0.56                 | 0.44  | 0.50  | 0.28   | 0.28  | 0.51269 | 0.90638                    | 0.17                     | -0.52 | 0.56                  | 0.27  | -0.18 | 0.40    | -0.29 |   |       |   |   |
| RPneg_173.1186_7.682   | RP    | neg        | 7.682           | 173.1187   |            |      | 4        |         | 0.43619                                 | 0.73444 | -0.22 | 0.32                  | 0.09  | 0.11  | 0.20   | 0.25  | 0.28203 | 0.79090                    | -0.13                    | -0.49 | 0.07                  | -0.07 | 0.03  | 0.01    | -0.02 |   |       |   |   |
| HILICpos_173.1284_3.95 | HILIC | pos        | 3.95            | 173.1284   |            |      | 4        |         | 0.38069                                 | 0.69498 | 0.20  | 0.36                  | 1.34  | 0.28  | 0.05   | -0.51 | 0.01614 | 0.27215                    | 0.80                     | 0.45  | 1.26                  | 1.44  | 0.63  | 0.13    | -0.33 |   |       |   |   |
| HILICpos_173.1284_4.22 | HILIC | pos        | 4.22            | 173.1284   |            |      | 4        |         | 0.43697                                 | 0.73499 | 0.18  | 0.12                  | 1.28  | 0.26  | 0.10   | -0.28 | 0.00205 | 0.08802                    | 0.68                     | 0.25  | 1.00                  | 1.33  | 0.55  | 0.32    | -0.25 |   |       |   |   |
| HILICpos_173.1322_0.38 | HILIC | pos        | 0.38            | 173.1322   |            |      | 4        |         | 0.58591                                 | 0.82164 | -0.21 | -0.21                 | -0.03 | 0.05  | 0.00   | -0.42 | 0.58285 | 0.92451                    | 0.24                     | 1.40  | -0.29                 | 0.42  | -0.03 | 0.17    | 0.50  |   |       |   |   |
| RPpos_173.1328_11.05   | RP    | pos        | 11.05           | 173.1328   |            |      | 4        |         | 0.20864                                 | 0.55161 | -0.49 | -0.16                 | -0.01 | -0.14 | -0.46  | -0.49 | 0.49992 | 0.90116                    | 0.29                     | 1.50  | -0.26                 | 0.54  | -0.05 | 0.18    | 0.62  |   |       |   |   |
| HILICpos_173.165_0.89  | HILIC | pos        | 0.89            | 173.1650   |            |      | 4        |         | 0.00458                                 | 0.13611 | -0.94 | -0.83                 | -0.51 | -0.52 | -0.87  | -0.72 | 0.49000 | 0.89836                    | -0.22                    | -0.48 | -0.16                 | -0.75 | -0.06 | -0.13   | -0.04 |   |       |   |   |
| HILICpos_173.165_1.47  | HILIC | pos        | 1.47            | 173.1650   |            |      | 4        |         | 0.98004                                 | 0.99236 | -0.01 | 0.11                  | 0.06  | 0.03  | 0.05   | -0.14 | 0.71118 | 0.95299                    | 0.20                     | 0.32  | 0.25                  | 0.31  | 0.28  | 0.32    | 0.25  |   |       |   |   |
| RPpos_173.1652_7.36    | RP    | pos        | 7.36            | 173.1652   |            |      | 4        |         | 0.05998                                 | 0.36595 | -0.66 | 0.08                  | -1.02 | -0.36 | -0.21  | -0.09 | 0.38916 | 0.85117                    | -0.08                    | -0.07 | 0.06                  | -0.06 | -0.62 | -0.14   | -0.08 |   |       |   |   |
| HILICneg_173.829_1.39  | HILIC | neg        | 1.39            | 173.8290   |            |      | 4        |         | 0.70770                                 | 0.88077 | 0.12  | 0.17                  | 0.08  | 0.40  | 0.57   | 0.23  | 0.11940 | 0.60572                    | 0.35                     | 0.33  | -0.08                 | 0.37  | 0.30  | 0.58    | 0.61  |   |       |   |   |
| HILICneg_173.8296_2.67 | HILIC | neg        | 2.67            | 173.8296   |            |      | 4        |         | 0.00246                                 | 0.10246 | -0.84 | -0.08                 | -0.36 | -0.41 | -0.31  | 0.11  | 0.78972 | 0.96713                    | -0.13                    | 0.10  | -0.06                 | -0.69 | -0.12 | 0.09    | 0.17  |   |       |   |   |
| HILICneg_173.9267_0.96 | HILIC | neg        | 0.96            | 173.9267   |            |      | 4        |         | 0.78796                                 | 0.91694 | -0.15 | 0.12                  | 0.11  | -0.07 | -0.08  | 0.06  | 0.00255 | 0.09991                    | -0.42                    | -0.85 | -0.78                 | -0.42 | -0.35 | -0.13   | -0.27 |   |       |   |   |
| HILICneg_173.987_0.58  | HILIC | neg        | 0.58            | 173.9870   |            |      | 4        |         | 0.51993                                 | 0.78761 | -0.10 | -0.18                 | 0.10  | -0.15 | -0.19  | -0.15 | 0.13002 | 0.69696                    | 0.50                     | -0.44 | -0.44                 | -0.34 | 0.38  | -0.43   | 0.64  |   |       |   |   |
| HILICneg_173.9944_2.8  | HILIC | neg        | 2.8             | 173.9944   |            |      | 4        |         | 0.09347                                 | 0.42297 | -0.18 | 0.34                  | -0.08 | -0.09 | 0.00   | -0.63 | 0.17153 | 0.68439                    | 0.43                     | 0.43  | 0.51                  | 0.69  | 0.54  | 0.28    | -0.11 |   |       |   |   |
| HILICneg_174.0057_5.76 | HILIC | neg        | 5.76            | 174.0057   |            |      | 4        |         | 0.05320                                 | 0.35272 | -0.19 | 0.10                  | 0.05  | -0.01 | -0.28  | -0.04 | 0.22061 | 0.73716                    | -0.13                    | -0.02 | 0.08                  | -0.15 | -0.20 | -0.23   | -0.12 |   |       |   |   |
| HILICneg_174.0411_4.33 | HILIC | neg        | 4.33            | 174.0411   |            |      | 4        |         | 0.70243                                 | 0.87845 | 0.09  | 0.20                  | 0.40  | 0.10  | 0.22   | -0.05 | 0.00676 | 0.17372                    | 0.66                     | 0.44  | 0.46                  | 0.48  | 1.08  | 0.38    | 0.27  |   |       |   |   |
| HILICneg_174.0413_5.41 | HILIC | neg        | 5.41            | 174.0413   |            |      | 4        |         | 0.35469                                 | 0.67399 | 0.35  | 0.40                  | 0.29  | 0.46  | 0.27   | 0.29  | 0.07886 | 0.52748                    | 0.26                     | 0.24  | 0.24                  | 0.62  | 0.14  | 0.26    | -0.16 |   |       |   |   |
| RPneg_174.05611_5.698  | RP    | neg        | 5.698           | 174.0561   |            |      | 4        |         | 0.05890                                 | 0.36415 | 0.72  | 0.72                  | 0.93  | 0.84  | 0.63   | 0.79  | 0.09451 | 0.56282                    | -0.41                    | -0.44 | -0.42                 | -0.47 | -0.36 | -0.39   | -0.30 |   |       |   |   |
| RPneg_174.05615_4.466  | RP    | neg        | 4.466           | 174.0562   |            |      | 4        |         | 0.58066                                 | 0.81867 | 0.37  | 0.63                  | 0.60  | 0.57  | 0.55   | -0.32 | 0.89696 | 0.98504                    | -0.01                    | 0.49  | 0.05                  | -0.22 | 0.10  | -0.18   | 0.23  |   |       |   |   |
| HILICneg_174.0565_0.51 | HILIC | neg        | 0.51            | 174.0565   |            |      | 4        |         | 0.07795                                 | 0.39986 | 0.62  | 0.17                  | 1.05  | 0.94  | 0.32   | 0.31  | 0.42658 | 0.87138                    | 0.59                     | -0.11 | 2.03                  | -0.22 | 0.90  | 1.13    | -0.22 |   |       |   |   |
| RPneg_174.05949_2.846  | RP    | neg        | 2.846           | 174.0595   |            |      | 4        |         | 0.77380                                 | 0.91079 | -0.09 | 0.48                  | 1.17  | 0.13  | -0.19  | -0.25 | 0.51267 | 0.90638                    | -0.22                    | -0.29 | 0.03                  | 0.23  | 0.11  | -0.44   | -0.32 |   |       |   |   |
| HILICneg_174.0596_1.1  | HILIC | neg        | 1.1             | 174.0596   |            |      | 4        |         | 0.71587                                 | 0.88437 | -0.11 | 0.39                  | 1.20  | 0.01  | -0.15  | -0.28 | 0.47739 | 0.89338                    | -0.25                    | -0.17 | -0.19                 | 0.27  | -0.01 | -0.53   | -0.33 |   |       |   |   |
| HILICneg_174.0776_1.19 | HILIC | neg        | 1.19            | 174.0776   |            |      | 4        |         | 0.78470                                 | 0.91544 | 0.08  | 0.11                  | 0.41  | 0.41  | 0.31   | 0.12  | 0.40526 | 0.86004                    | 0.17                     | -0.04 | 0.53                  | -0.05 | 0.08  | 0.50    | 0.52  |   |       |   |   |
| HILICpos_174.1121_4.81 | HILIC | pos        | 4.81            | 174.1121   |            |      | 4        |         | 0.44247                                 | 0.73848 | -0.09 | 0.07                  | -0.01 | -0.07 | -0.09  | -0.15 |         |                            |                          |       |                       |       |       |         |       |   |       |   |   |

| Feature_ID             | Mode  | Ionization | Average_Rt.min. | Average_Mz | Metabolite | MSMS | ID_Level | HMDB_ID | IV-Alcohol self-administration (IV-ASA) |         |       |       |       |                       |       |       |         |         | IV-Alcohol clamp (IV-AC)   |       |       |       |       |                       |       |   |   |   |
|------------------------|-------|------------|-----------------|------------|------------|------|----------|---------|-----------------------------------------|---------|-------|-------|-------|-----------------------|-------|-------|---------|---------|----------------------------|-------|-------|-------|-------|-----------------------|-------|---|---|---|
|                        |       |            |                 |            |            |      |          |         | Area Under the Curve (AUC)              |         |       |       |       | IV-Ghrelin or Placebo |       |       |         |         | Area Under the Curve (AUC) |       |       |       |       | IV-Ghrelin or Placebo |       |   |   |   |
|                        |       |            |                 |            |            |      |          |         | Baseline                                |         |       |       |       | BrAC=0                |       |       |         |         | Baseline                   |       |       |       |       | Post-LD               |       |   |   |   |
|                        |       |            |                 |            |            |      |          |         | p                                       | q       | d     | d     | d     | d                     | d     | d     | d       | d       | p                          | q     | d     | d     | d     | d                     | d     | d | d | d |
| RPneg_176.07208_4.973  | RP    | neg        | 4.973           |            |            |      | 4        |         | 0.80162                                 | 0.92346 | -0.07 | -0.04 | 0.01  | -0.11                 | -0.04 | 0.49  | 0.13399 | 0.63100 | 0.42                       | 0.44  | 0.43  | 0.29  | 0.49  | 0.39                  | 0.50  |   |   |   |
| HILICpos_176.074_1.08  | HILIC | pos        | 1.08            | 176.0740   |            |      | 4        |         | 0.80547                                 | 0.92518 | -0.07 | 0.42  | 1.32  | 0.20                  | -0.18 | -0.26 | 0.63573 | 0.93576 | -0.17                      | -0.11 | 0.08  | 0.44  | 0.01  | -0.38                 | -0.34 |   |   |   |
| RPpos_176.074_2.48     | RP    | pos        | 2.48            | 176.0740   |            |      | 4        |         | 0.97191                                 | 0.98967 | 0.01  | 0.48  | 0.88  | 0.37                  | -0.14 | -0.25 | 0.39481 | 0.85426 | -0.29                      | -0.32 | 0.05  | 0.20  | 0.12  | -0.58                 | -0.32 |   |   |   |
| RPpos_176.0741_2.86    | RP    | pos        | 2.86            | 176.0741   |            |      | 4        |         | 0.85395                                 | 0.94531 | -0.05 | 0.46  | 1.24  | 0.17                  | -0.18 | -0.28 | 0.49006 | 0.89836 | -0.22                      | -0.26 | 0.05  | 0.23  | -0.02 | -0.43                 | -0.31 |   |   |   |
| HILICpos_176.1279_4.13 | HILIC | pos        | 4.13            | 176.1279   |            |      | 4        |         | 0.72151                                 | 0.64760 | -0.26 | -0.25 | -0.26 | -0.28                 | -0.26 | -0.30 | 0.26765 | 0.64765 | -0.08                      | -0.29 | 0.60  | 0.29  | 0.01  | -0.05                 | -0.26 |   |   |   |
| HILICpos_176.1282_3    | HILIC | pos        | 3               | 176.1282   |            |      | 4        |         | 0.76683                                 | 0.91620 | -0.03 | 0.01  | 0.03  | -0.09                 | 0.00  | -0.06 | 0.49747 | 0.90077 | -0.16                      | -0.19 | -0.15 | 0.19  | -0.14 | -0.12                 | -0.24 |   |   |   |
| HILICpos_176.1282_5.29 | HILIC | pos        | 5.29            | 176.1282   |            |      | 4        |         | 0.38513                                 | 0.69767 | -0.26 | -0.13 | -0.06 | -0.29                 | -0.31 | -0.17 | 0.62715 | 0.93462 | -0.15                      | -0.19 | -0.13 | -0.09 | -0.11 | -0.04                 | -0.37 |   |   |   |
| HILICpos_176.1282_3.98 | HILIC | pos        | 3.98            | 176.1282   |            |      | 4        |         | 0.36899                                 | 0.68541 | -0.14 | 0.01  | 0.11  | 0.20                  | -0.15 | -0.06 | 0.43277 | 0.87526 | -0.04                      | -0.09 | -0.10 | 0.18  | -0.04 | 0.07                  | -0.27 |   |   |   |
| HILICpos_176.1394_3.6  | HILIC | pos        | 3.6             | 176.1394   |            |      | 4        |         | 0.40998                                 | 0.71525 | -0.25 | -0.39 | -0.11 | 0.42                  | -0.04 | -0.44 | 0.02699 | 0.34474 | 0.34                       | 0.11  | 0.47  | 0.53  | 0.26  | 0.08                  | 0.20  |   |   |   |
| HILICpos_176.1643_0.77 | HILIC | pos        | 0.77            | 176.1643   |            |      | 4        |         | 0.16664                                 | 0.51203 | 0.31  | -0.08 | 0.03  | 0.32                  | 0.63  | 0.06  | 0.87266 | 0.98134 | 0.05                       | 1.02  | -0.12 | 0.02  | 1.48  | -0.09                 | -0.34 |   |   |   |
| RPpos_176.6106_10.08   | RP    | pos        | 10.08           | 176.6106   |            |      | 4        |         | 0.34721                                 | 0.66800 | 0.20  | 0.23  | 0.09  | 0.49                  | 0.50  | 0.61  | 0.27710 | 0.78625 | -0.17                      | -0.21 | -0.22 | 0.02  | -0.25 | -0.18                 | 0.04  |   |   |   |
| HILICneg_176.8177_7.08 | HILIC | neg        | 7.08            | 176.8177   |            |      | 4        |         | 0.10909                                 | 0.44263 | -0.46 | -0.08 | -0.27 | 0.07                  | 0.26  | 0.54  | 0.02149 | 0.30973 | -0.46                      | -0.58 | -0.46 | -0.57 | -0.76 | -0.86                 | 0.50  |   |   |   |
| HILICneg_176.818_0.93  | HILIC | neg        | 0.93            | 176.8180   |            |      | 4        |         | 0.01203                                 | 0.20984 | -0.45 | -0.42 | -0.45 | -0.07                 | -0.46 | -0.15 | 0.22273 | 0.73947 | -0.20                      | -0.17 | -0.15 | -0.43 | -0.06 | -0.17                 | 0.01  |   |   |   |
| HILICneg_176.8264_4.89 | HILIC | neg        | 4.89            | 176.8264   |            |      | 4        |         | 0.21231                                 | 0.55488 | -0.38 | -0.35 | -0.05 | -0.08                 | -0.25 | -0.57 | 0.60291 | 0.92874 | -0.01                      | 0.05  | -0.13 | -0.14 | 0.25  | -0.09                 | 0.34  |   |   |   |
| RPneg_176.82661_14.18  | RP    | neg        | 14.18           | 176.8266   |            |      | 4        |         | 0.43503                                 | 0.73327 | -0.24 | 0.03  | -0.33 | 0.40                  | -0.47 | -0.11 | 0.98368 | 0.99758 | 0.00                       | -0.40 | 0.30  | -0.24 | 0.04  | 0.27                  | -0.44 |   |   |   |
| HILICneg_176.9174_7.73 | HILIC | neg        | 7.73            | 176.9174   |            |      | 4        |         | 0.57551                                 | 0.81613 | -0.19 | 0.17  | 0.14  | 0.07                  | -0.02 | -0.26 | 0.07556 | 0.52069 | -0.41                      | -0.23 | -0.36 | -0.26 | -0.51 | -0.48                 | -0.35 |   |   |   |
| RPneg_176.98692_2.197  | RP    | neg        | 2.197           | 176.9869   |            |      | 4        |         | 0.17915                                 | 0.52435 | 0.48  | 1.09  | 0.84  | 0.66                  | 0.44  | 0.83  | 0.37447 | 0.84348 | 0.15                       | 0.07  | 0.18  | 0.27  | 0.37  | 0.15                  | -0.06 |   |   |   |
| HILICpos_176.9995_1.38 | HILIC | pos        | 1.38            | 176.9995   |            |      | 4        |         | 0.40381                                 | 0.71152 | -0.25 | -0.10 | 0.35  | -0.49                 | -0.12 | 0.76  | 0.47631 | 0.89309 | 0.45                       | -0.20 | 0.13  | 0.88  | 0.54  | 1.33                  | -0.44 |   |   |   |
| RPneg_177.02283_1.863  | RP    | neg        | 1.863           | 177.0228   |            |      | 4        |         | 0.77618                                 | 0.91785 | 0.10  | 0.30  | 1.47  | 0.45                  | 0.25  | -0.39 | 0.43577 | 0.87641 | 0.38                       | -0.29 | 0.60  | 0.24  | 0.56  | 0.23                  | -0.11 |   |   |   |
| HILICneg_177.0231_2.33 | HILIC | neg        | 2.33            | 177.0231   |            |      | 4        |         | 0.21083                                 | 0.55384 | 0.01  | 0.26  | 0.36  | 0.28                  | 0.06  | -0.70 | 0.70911 | 0.95266 | -0.06                      | -0.34 | 0.11  | 0.21  | 0.07  | 0.23                  | 0.18  |   |   |   |
| HILICneg_177.0231_0.96 | HILIC | neg        | 0.96            | 177.0231   |            |      | 4        |         | 0.91619                                 | 0.96940 | 0.15  | 0.27  | 0.28  | 0.32                  | 0.24  | -0.15 | 0.07018 | 0.50745 | 0.62                       | 0.49  | 0.81  | 0.66  | 0.66  | 0.52                  | 0.42  |   |   |   |
| HILICpos_177.0247_6.25 | HILIC | pos        | 6.25            | 177.0247   |            |      | 4        |         | 0.80438                                 | 0.92471 | -0.06 | 0.24  | 0.67  | 0.44                  | -0.21 | -0.52 | 0.03917 | 0.40353 | 0.41                       | 0.41  | 0.61  | 0.87  | 0.38  | -0.10                 | -0.80 |   |   |   |
| RPneg_177.05609_7.86   | RP    | neg        | 7.86            | 177.0561   |            |      | 4        |         | 0.48059                                 | 0.76426 | 0.31  | 0.19  | 0.38  | 0.29                  | 0.44  | 0.15  | 0.77363 | 0.96458 | 0.41                       | 0.42  | 0.43  | 0.42  | 0.42  | 0.40                  | 0.44  |   |   |   |
| HILICpos_177.066_0.74  | HILIC | pos        | 0.74            | 177.0660   |            |      | 4        |         | 0.30470                                 | 0.63375 | 0.26  | 0.17  | 0.50  | 0.39                  | 0.58  | 0.07  | 0.24426 | 0.76059 | 0.64                       | 0.60  | 0.61  | 0.86  | 0.68  | 0.70                  | 0.40  |   |   |   |
| HILICpos_177.0746_1.22 | HILIC | pos        | 1.22            | 177.0746   |            |      | 4        |         | 0.70409                                 | 0.87908 | -0.02 | 0.13  | 0.04  | 0.16                  | 0.08  | 0.64  | 0.76163 | 0.96272 | -0.09                      | -0.36 | -0.18 | 0.10  | -0.12 | -0.08                 | 0.09  |   |   |   |
| HILICpos_177.0872_6.3  | HILIC | pos        | 6.3             | 177.0872   |            |      | 4        |         | 0.27914                                 | 0.61371 | -0.29 | -0.35 | -0.33 | -0.52                 | 0.15  | 0.89  | 0.22204 | 0.73863 | 0.46                       | 0.19  | 0.26  | 0.41  | 0.25  | 0.52                  | 0.98  |   |   |   |
| RPpos_177.1126_5.68    | RP    | pos        | 5.68            | 177.1126   |            |      | 4        |         | 0.31508                                 | 0.64256 | -0.23 | -0.18 | 0.00  | -0.21                 | -0.09 | -0.19 | 0.05743 | 0.47139 | 0.50                       | 0.40  | 0.45  | 0.80  | 0.29  | 0.17                  | 0.51  |   |   |   |
| HILICpos_177.1386_1.77 | HILIC | pos        | 1.77            | 177.1386   |            |      | 4        |         | 0.79936                                 | 0.91969 | -0.05 | -0.08 | -0.08 | -0.07                 | 0.03  | 0.26  | 0.94126 | 0.99159 | -0.11                      | -0.02 | -0.02 | -0.10 | -0.08 | -0.09                 | -0.37 |   |   |   |
| RPneg_177.16528_7.889  | RP    | neg        | 7.889           | 177.1653   |            |      | 4        |         | 0.92587                                 | 0.97327 | 0.00  | 0.08  | 0.19  | 0.02                  | 0.12  | 0.17  | 0.22051 | 0.73711 | 0.46                       | 0.43  | 0.30  | 0.43  | 0.30  | 0.40                  | 0.64  |   |   |   |
| HILICneg_177.9034_3.33 | HILIC | neg        | 3.33            | 177.9034   |            |      | 4        |         | 0.50755                                 | 0.78075 | -0.25 | -1.17 | 0.19  | 0.21                  | 0.28  | -0.53 | 0.63587 | 0.93582 | 0.15                       | -0.38 | 0.18  | 0.01  | -0.16 | 0.46                  | 0.54  |   |   |   |
| HILICpos_177.9667_0.94 | HILIC | pos        | 0.94            | 177.9667   |            |      | 4        |         | 0.63973                                 | 0.84771 | 0.07  | 0.03  | 0.20  | 0.13                  | 0.45  | -0.30 | 0.00849 | 0.19719 | -0.40                      | -0.53 | -0.46 | -0.37 | -0.27 | -0.29                 | -0.64 |   |   |   |
| HILICneg_178.0065_5.85 | HILIC | neg        | 5.85            | 178.0068   |            |      | 4        |         | 0.60427                                 | 0.82141 | -0.10 | 0.33  | 0.56  | 0.10                  | -0.03 | -0.64 | 0.00951 | 0.20755 | 1.08                       | 0.88  | 0.99  | 1.27  | 0.80  | 0.71                  | 0.13  |   |   |   |
| HILICneg_178.0516_1.02 | HILIC | neg        | 1.02            | 178.0516   |            |      | 4        |         | 0.72466                                 | 0.60440 | -0.69 | 0.44  | 0.78  | 1.26                  | 0.67  | 0.39  | 0.99340 | 0.99904 | 0.06                       | -0.34 | -0.03 | 0.74  | 0.36  | 0.48                  | -0.36 |   |   |   |
| HILICpos_178.0585_6.9  | HILIC | pos        | 6.9             | 178.0588   |            |      | 4        |         | 0.03589                                 | 0.31047 | -0.37 | 0.12  | 0.22  | -0.43                 | -0.41 | 0.29  | 0.05527 | 0.46440 | 0.35                       | 0.27  | 0.33  | 0.12  | 0.41  | -0.01                 | -0.27 |   |   |   |
| HILICneg_178.0643_3.53 | HILIC | neg        | 3.53            | 178.0643   |            |      | 4        |         | 0.70967                                 | 0.88142 | -0.04 | 0.01  | -0.01 | -0.03                 | 0.03  | -0.31 | 0.76638 | 0.96390 | -0.02                      | -0.04 | -0.03 | -0.02 | -0.02 | -0.05                 | 0.08  |   |   |   |
| HILICpos_178.0721_2.47 | HILIC | pos        | 2.47            | 178.0721   |            |      | 4        |         | 0.03420                                 | 0.30469 | -0.38 | -0.20 | -0.27 | -0.22                 | -0.47 | 0.48  | 0.58127 | 0.92438 | -0.33                      | -0.10 | 0.06  | -0.48 | -0.13 | -0.66                 | 0.14  |   |   |   |
| HILICpos_178.0862_4.74 | HILIC | pos        | 4.74            | 178.0862   |            |      | 4        |         | 0.08115                                 | 0.40576 | -0.12 | 0.00  | -0.03 | 0.17                  | -0.02 | -0.04 | 0.02906 | 0.35551 | -0.23                      | -0.20 | -0.19 | -0.25 | -0.28 | -0.24                 | -0.21 |   |   |   |
| HILICpos_178.0862_3.52 | HILIC | pos        | 3.52            | 178.0862   |            |      | 4        |         | 0.07124                                 | 0.38666 | -0.09 | 0.01  | -0.03 | 0.24                  | -0.04 | -0.06 | 0.05743 | 0.47139 | -0.18                      | -0.16 | -0.16 | -0.17 | -0.18 | -0.17                 | -0.18 |   |   |   |
| RPpos_178.0864_4.98    | RP    | pos        | 4.98            | 178.0864   |            |      | 4        |         | 0.70623                                 | 0.88014 | -0.09 | -0.10 | 0.00  | -0.11                 | -0.06 | 0.52  | 0.15048 | 0.65541 | 0.38                       | 0.35  | 0.42  | 0.32  | 0.37  | 0.37                  | 0.47  |   |   |   |
| RPneg_178.86534_11.195 | RP    | neg        | 11.195          | 178.8653   |            |      | 4        |         | 0.03768                                 | 0.31436 | 0.78  | -0.07 | 0.22  | 0.42                  | 2.25  | -0.71 | 0.98429 | 0.99771 | 0.00                       | -0.05 | -0.26 | 0.05  | 0.41  | 0.28                  | -0.03 |   |   |   |
| HILICneg_178.8807_4.37 | HILIC | neg        | 4.37            | 178.8807   |            |      | 4        |         | 0.00349                                 | 0.12120 | -0.48 | -0.17 | -0.42 | -0.06                 | -0.02 | -0.06 | 0.83319 | 0.97501 | -0.01                      | 0.00  | -0.08 | 0.00  | -0.11 | 0.14                  | 0.07  |   |   |   |
| HILICneg_178.8807_1.29 | HILIC | neg        | 1.29            | 178.8807   |            |      | 4        |         | 0.46321                                 | 0.75281 | -0.23 | -0.10 | -0.13 | 0.26                  | -0.14 | 0.97  | 0.83676 | 0.97578 | -0.06                      | -0.27 | -0.04 | 0.00  | -0.28 | 0.01                  | 0.15  |   |   |   |
| HILICneg_178.8807_1.4  | HILIC | neg        | 1.4             | 178.8807   |            |      | 4        |         | 0.29005                                 | 0.62327 | -0.35 | 0.12  | -0.10 | 0.31                  | 0.36  | 0.17  | 0.14673 | 0.65071 | 0.03                       | 0.26  | -0.16 | -0.18 | -0.01 | -0.09                 | 0.56  |   |   |   |
| HILICneg_178.8808_4.28 | HILIC | neg        | 4.28            | 178.8808   |            |      | 4        |         | 0.06415                                 | 0.37351 | -0.53 | -0.17 | -0.13 | -0.04                 | 0.07  | 0.35  | 0.82946 | 0.97454 | 0.03                       | -0.02 | 0.07  | -0.12 | 0.0   |                       |       |   |   |   |

| Feature_ID             | ID | Mode  | Ionization | Average_Rt.min. | Average_Mz | Metabolite | MSMS | ID_Level | HMDB_ID | IV-Alcohol self-administration (IV-ASA) |         |        |       |       |                       |       |                       |         |         | IV-Alcohol clamp (IV-AC)   |       |       |       |       |                       |       |                       |   |   |
|------------------------|----|-------|------------|-----------------|------------|------------|------|----------|---------|-----------------------------------------|---------|--------|-------|-------|-----------------------|-------|-----------------------|---------|---------|----------------------------|-------|-------|-------|-------|-----------------------|-------|-----------------------|---|---|
|                        |    |       |            |                 |            |            |      |          |         | Area Under the Curve (AUC)              |         |        |       |       | IV-Ghrelin or Placebo |       |                       |         |         | Area Under the Curve (AUC) |       |       |       |       | IV-Ghrelin or Placebo |       |                       |   |   |
|                        |    |       |            |                 |            |            |      |          |         | Baseline                                |         | IV-ASA |       |       | Baseline              |       | IV-Ghrelin or Placebo |         |         | Baseline                   |       | IV-AC |       |       | Baseline              |       | IV-Ghrelin or Placebo |   |   |
|                        |    |       |            |                 |            |            |      |          |         | p                                       | q       | d      | d     | d     | d                     | d     | d                     | d       | d       | p                          | q     | d     | d     | d     | d                     | d     | d                     | d | d |
| HILICpos_181.0258_0.49 | 4  | HILIC | pos        | 0.49            | 181.0258   |            |      | 4        |         | 0.42331                                 | 0.72516 | -0.28  | -0.13 | 0.10  | 0.07                  | -0.31 | -0.47                 | 0.91609 | 0.98777 | -0.06                      | 0.18  | 0.13  | 0.47  | 0.22  | -0.07                 | 0.32  |                       |   |   |
| RPneg_181.03699_1.91   | 4  | RP    | neg        | 1.91            | 181.0370   |            |      | 4        |         | 0.73065                                 | 0.89053 | -0.08  | -0.02 | 0.00  | 0.03                  | 0.01  | -0.53                 | 0.52983 | 0.91151 | -0.17                      | -0.16 | -0.17 | -0.21 | -0.14 | -0.17                 | -0.23 |                       |   |   |
| HILICneg_181.0373_2.46 | 4  | HILIC | neg        | 2.46            | 181.0373   |            |      | 4        |         | 0.26043                                 | 0.59822 | 0.39   | 0.30  | 0.56  | 0.60                  | 0.48  | 0.02                  | 0.40133 | 0.85838 | 0.45                       | 0.35  | 0.42  | 0.51  | 0.57  | 0.55                  | 0.11  |                       |   |   |
| HILICneg_181.0373_2    | 4  | HILIC | neg        | 2               | 181.0373   |            |      | 4        |         | 0.70737                                 | 0.88052 | -0.09  | -0.02 | 0.03  | 0.02                  | -0.01 | -0.49                 | 0.51138 | 0.90555 | -0.17                      | -0.19 | -0.19 | -0.19 | -0.16 | -0.18                 | -0.22 |                       |   |   |
| HILICneg_181.039_5.17  | 4  | HILIC | neg        | 6.17            | 181.0390   |            |      | 4        |         | 0.64956                                 | 0.85177 | -0.18  | 0.50  | 0.32  | 0.03                  | 0.08  | -0.18                 | 0.00750 | 0.18306 | 0.26                       | 0.33  | 0.52  | 0.56  | 0.25  | 0.12                  | -0.18 |                       |   |   |
| HILICneg_181.0507_0.75 | 4  | HILIC | neg        | 0.75            | 181.0507   |            |      | 4        |         | 0.13795                                 | 0.54249 | -0.25  | 0.54  | 0.28  | 0.21                  | 0.34  | 0.31                  | 0.26015 | 0.7444  | 0.7444                     | -0.06 | -0.31 | 0.44  | 0.30  | -0.21                 | -0.38 |                       |   |   |
| RPneg_181.0509_2.812   | 4  | RP    | neg        | 2.812           | 181.0509   |            |      | 4        |         | 0.97248                                 | 0.98979 | 0.18   | 0.28  | 0.62  | 0.54                  | 0.30  | -0.37                 | 0.38863 | 0.85116 | 0.19                       | -0.30 | 0.09  | 0.15  | 0.35  | 0.29                  | 0.22  |                       |   |   |
| RPneg_181.05095_2.308  | 4  | RP    | neg        | 2.308           | 181.0510   |            |      | 4        |         | 0.50524                                 | 0.77940 | -0.11  | -0.29 | -0.04 | 0.02                  | -0.06 | -0.42                 | 0.07870 | 0.52743 | 0.67                       | 0.39  | 0.85  | 0.88  | 1.08  | 0.93                  | 0.06  |                       |   |   |
| HILICneg_181.0719_4.57 | 4  | HILIC | neg        | 4.57            | 181.0719   |            |      | 4        |         | 0.68762                                 | 0.87124 | 0.17   | 0.53  | 0.34  | 0.23                  | 0.49  | 0.62                  | 0.58896 | 0.92655 | 0.18                       | 0.38  | 0.24  | 0.48  | 0.24  | 0.21                  | -0.28 |                       |   |   |
| RPpos_181.0722_2.56    | 4  | RP    | pos        | 2.56            | 181.0722   |            |      | 4        |         | 0.59315                                 | 0.82560 | 0.15   | 0.16  | 0.22  | 0.24                  | 0.26  | -0.03                 | 0.70457 | 0.95228 | -0.08                      | -0.06 | -0.03 | -0.07 | -0.05 | -0.11                 | -0.31 |                       |   |   |
| HILICpos_181.0829_1.38 | 4  | HILIC | pos        | 1.38            | 181.0829   |            |      | 4        |         | 0.45873                                 | 0.75022 | -0.24  | -0.12 | 0.31  | -0.37                 | -0.07 | 0.64                  | 0.45830 | 0.88479 | 0.40                       | 0.13  | 0.16  | 0.68  | 0.55  | 1.09                  | -0.38 |                       |   |   |
| RPpos_181.086_7.72     | 4  | RP    | pos        | 7.72            | 181.0860   |            |      | 4        |         | 0.36895                                 | 0.68539 | -0.06  | 0.02  | 0.14  | -0.10                 | 0.04  | -0.26                 | 0.86378 | 0.97991 | 0.05                       | -0.01 | 0.12  | 0.06  | 0.03  | 0.10                  | -0.04 |                       |   |   |
| RPpos_181.1585_11.05   | 4  | RP    | pos        | 11.05           | 181.1585   |            |      | 4        |         | 0.18929                                 | 0.53578 | -0.49  | -0.17 | -0.05 | -0.12                 | -0.44 | -0.55                 | 0.51464 | 0.90649 | 0.30                       | 1.29  | -0.29 | 0.67  | 0.01  | 0.21                  | 0.62  |                       |   |   |
| HILICneg_182.0325_4.91 | 4  | HILIC | neg        | 4.91            | 182.0325   |            |      | 4        |         | 0.89978                                 | 0.96330 | 0.08   | 0.49  | 0.52  | 0.11                  | 0.18  | 0.19                  | 0.13017 | 0.62371 | -0.20                      | 0.23  | -0.42 | 0.05  | 0.15  | -0.55                 | -0.52 |                       |   |   |
| HILICneg_182.0326_2.11 | 4  | HILIC | neg        | 2.11            | 182.0326   |            |      | 4        |         | 0.30319                                 | 0.63234 | -0.17  | 0.29  | 0.29  | -0.13                 | 0.01  | 0.25                  | 0.09370 | 0.56064 | -0.33                      | 0.03  | -0.65 | -0.03 | 0.05  | -0.45                 | -0.52 |                       |   |   |
| HILICneg_182.0459_0.95 | 4  | HILIC | neg        | 0.95            | 182.0459   |            |      | 4        |         | 0.44516                                 | 0.74083 | 0.52   | 0.05  | 1.46  | 0.58                  | 0.63  | -0.12                 | 0.40324 | 0.85869 | 1.85                       | 2.75  | 2.50  | 1.72  | 1.61  | 1.25                  | 0.57  |                       |   |   |
| RPneg_182.04591_1.689  | 4  | RP    | neg        | 1.689           | 182.0459   |            |      | 4        |         | 0.46223                                 | 0.75264 | 0.54   | 0.13  | 1.11  | 0.63                  | 0.76  | 0.07                  | 0.41095 | 0.86360 | 1.61                       | 2.07  | 2.17  | 1.64  | 1.36  | 1.19                  | 0.55  |                       |   |   |
| HILICneg_182.0576_5.89 | 4  | HILIC | neg        | 5.89            | 182.0576   |            |      | 4        |         | 0.50875                                 | 0.78161 | 0.24   | 0.36  | 0.78  | 0.06                  | 0.49  | 0.01                  | 0.00048 | 0.03598 | 0.89                       | 0.68  | 1.00  | 0.91  | 0.81  | 1.23                  | -0.02 |                       |   |   |
| HILICpos_182.0578_3.4  | 4  | HILIC | pos        | 3.4             | 182.0578   |            |      | 4        |         | 0.30659                                 | 0.63338 | -0.02  | 0.10  | -0.01 | 0.08                  | 0.07  | -0.38                 | 0.76156 | 0.96272 | 0.00                       | -0.04 | -0.05 | 0.27  | -0.07 | -0.02                 | -0.22 |                       |   |   |
| HILICpos_182.0789_4.54 | 4  | HILIC | pos        | 4.54            | 182.0789   |            |      | 4        |         | 0.97587                                 | 0.99063 | 0.07   | 0.09  | 0.02  | 0.03                  | 0.04  | -0.53                 | 0.75987 | 0.96243 | -0.04                      | 0.03  | -0.03 | 0.03  | 0.01  | -0.05                 | -0.10 |                       |   |   |
| RPpos_182.0811_1.21    | 4  | RP    | pos        | 1.21            | 182.0811   |            |      | 4        |         | 0.49346                                 | 0.73162 | 0.21   | 0.39  | 1.16  | 0.52                  | 0.10  | -0.52                 | 0.05608 | 0.46773 | 0.49                       | 0.14  | 0.61  | 0.99  | 0.73  | 0.43                  | -0.33 |                       |   |   |
| HILICpos_182.0811_0.84 | 4  | HILIC | pos        | 0.84            | 182.0811   |            |      | 4        |         | 0.21677                                 | 0.55881 | 0.14   | 0.03  | 0.29  | 0.19                  | 0.27  | 0.03                  | 0.94040 | 0.99127 | -0.13                      | -0.12 | -0.22 | -0.05 | 0.06  | -0.09                 | -0.29 |                       |   |   |
| RPneg_182.08232_4.398  | 4  | RP    | neg        | 4.398           | 182.0823   |            |      | 4        |         | 0.22660                                 | 0.56859 | 0.28   | 0.23  | 0.36  | 0.54                  | 0.21  | 0.16                  | 0.75041 | 0.96176 | 0.13                       | -0.41 | -0.12 | -0.06 | 0.52  | 0.54                  | -0.12 |                       |   |   |
| HILICpos_182.0926_4.18 | 4  | HILIC | pos        | 4.18            | 182.0926   |            |      | 4        |         | 0.33826                                 | 0.66125 | -0.26  | -0.14 | -0.21 | -0.30                 | -0.19 | -0.02                 | 0.11909 | 0.60528 | -0.59                      | -0.39 | -0.50 | -0.64 | -0.62 | -0.54                 | -0.50 |                       |   |   |
| HILICpos_182.1037_1.38 | 4  | HILIC | pos        | 1.38            | 182.1037   |            |      | 4        |         | 0.40285                                 | 0.71088 | -0.26  | -0.18 | 0.26  | -0.46                 | -0.07 | 0.87                  | 0.60269 | 0.92874 | 0.22                       | -0.23 | 0.20  | 0.55  | 0.62  | 0.49                  | -0.39 |                       |   |   |
| RPpos_182.1177_7.42    | 4  | RP    | pos        | 7.42            | 182.1177   |            |      | 4        |         | 0.92800                                 | 0.97426 | -0.01  | 0.09  | 0.08  | -0.01                 | 0.10  | 0.23                  | 0.66397 | 0.94310 | -0.02                      | -0.03 | 0.05  | -0.04 | 0.00  | -0.01                 | -0.05 |                       |   |   |
| HILICpos_182.1384_0.56 | 4  | HILIC | pos        | 0.56            | 182.1384   |            |      | 4        |         | 0.75895                                 | 0.90482 | 0.11   | 0.28  | 0.13  | 1.14                  | 0.16  | -0.07                 | 0.86595 | 0.98005 | -0.07                      | 0.00  | 0.23  | 0.33  | -0.19 | -0.23                 | 0.59  |                       |   |   |
| HILICneg_182.5204_4.94 | 4  | HILIC | neg        | 4.94            | 182.5204   |            |      | 4        |         | 0.50193                                 | 0.77730 | -0.20  | -0.10 | -0.11 | -0.14                 | -0.12 | -0.69                 | 0.30868 | 0.80765 | -0.25                      | -0.19 | -0.32 | -0.15 | -0.30 | -0.04                 | -0.59 |                       |   |   |
| HILICpos_182.707_4.3   | 4  | HILIC | pos        | 4.3             | 182.7070   |            |      | 4        |         | 0.26097                                 | 0.59840 | -0.42  | -0.24 | 0.06  | 0.02                  | -0.06 | -0.01                 | 0.34231 | 0.82739 | 0.03                       | 0.08  | 0.33  | -0.07 | 0.21  | 0.05                  | -0.06 |                       |   |   |
| HILICneg_182.8254_1.45 | 4  | HILIC | neg        | 1.45            | 182.8254   |            |      | 4        |         | 0.27754                                 | 0.61209 | -0.28  | -0.02 | -0.18 | -0.13                 | -0.01 | 0.37                  | 0.00000 | 0.00088 | -0.44                      | -0.37 | -0.54 | -0.62 | -0.32 | -0.32                 | -0.27 |                       |   |   |
| RPneg_182.85997_13.839 | 4  | RP    | neg        | 13.839          | 182.8600   |            |      | 4        |         | 0.34576                                 | 0.66700 | -0.22  | 0.15  | -0.31 | -0.04                 | 0.20  | -0.30                 | 0.37492 | 0.84371 | -0.53                      | -1.30 | -1.31 | 0.49  | 0.13  | 0.20                  | -0.06 |                       |   |   |
| HILICneg_182.8748_4.37 | 4  | HILIC | neg        | 4.37            | 182.8748   |            |      | 4        |         | 0.00658                                 | 0.33577 | -0.45  | 0.24  | -0.27 | 0.06                  | 0.12  | 0.53                  | 0.13254 | 0.70820 | -0.22                      | -0.04 | -0.47 | -0.07 | -0.34 | 0.12                  | -0.33 |                       |   |   |
| HILICpos_182.8748_4.28 | 4  | HILIC | pos        | 4.28            | 182.8748   |            |      | 4        |         | 0.94609                                 | 0.90932 | -0.06  | -0.19 | 0.24  | 0.33                  | 0.26  | 0.54                  | 0.79151 | 0.96742 | -0.09                      | 0.19  | 0.30  | -0.04 | -0.17 | -0.46                 | 0.02  |                       |   |   |
| HILICneg_182.9503_3.46 | 4  | HILIC | neg        | 3.46            | 182.9503   |            |      | 4        |         | 0.61698                                 | 0.83716 | 0.13   | 0.53  | 0.28  | 0.66                  | 0.63  | 0.71                  | 0.71017 | 0.95280 | -0.09                      | -0.14 | -0.35 | 0.08  | 0.15  | -0.13                 | -0.09 |                       |   |   |
| HILICneg_183.0108_0.83 | 4  | HILIC | neg        | 0.83            | 183.0108   |            |      | 4        |         | 0.41814                                 | 0.72193 | 0.02   | 0.17  | 0.26  | 0.04                  | 0.24  | -0.41                 | 0.10682 | 0.58505 | 0.19                       | 0.14  | 0.18  | 0.42  | 0.36  | -0.10                 | 0.24  |                       |   |   |
| HILICneg_183.016_2.45  | 4  | HILIC | neg        | 2.45            | 183.0160   |            |      | 4        |         | 0.28642                                 | 0.61993 | -0.19  | 0.25  | 0.21  | -0.21                 | 0.03  | 0.13                  | 0.14296 | 0.64534 | -0.30                      | -0.10 | -0.50 | -0.04 | 0.08  | -0.45                 | -0.35 |                       |   |   |
| HILICneg_183.0161_4.9  | 4  | HILIC | neg        | 4.9             | 183.0161   |            |      | 4        |         | 0.80182                                 | 0.92347 | 0.11   | 0.45  | 0.54  | 0.06                  | 0.19  | 0.30                  | 0.09098 | 0.55569 | -0.29                      | -0.01 | -0.50 | -0.04 | 0.14  | -0.79                 | -0.48 |                       |   |   |
| HILICneg_183.0167_4.2  | 4  | HILIC | neg        | 4.2             | 183.0167   |            |      | 4        |         | 0.17383                                 | 0.51922 | -0.18  | 0.30  | 0.46  | -0.07                 | -0.44 | -0.44                 | 0.59505 | 0.92745 | 0.19                       | 0.42  | 0.18  | 0.25  | 0.30  | 0.09                  | -0.30 |                       |   |   |
| RPneg_183.0275_1.907   | 4  | RP    | neg        | 1.907           | 183.0275   |            |      | 4        |         | 0.31721                                 | 0.64541 | 0.29   | 0.51  | 0.92  | 0.56                  | 0.68  | 0.23                  | 0.43908 | 0.87778 | 0.22                       | 0.11  | 0.08  | 0.07  | 0.41  | 0.48                  | -0.13 |                       |   |   |
| HILICneg_183.0278_1.05 | 4  | HILIC | neg        | 1.05            | 183.0278   |            |      | 4        |         | 0.15406                                 | 0.49686 | -0.35  | 0.15  | -0.23 | -0.05                 | 0.23  | -0.24                 | 0.14607 | 0.64946 | -0.18                      | 0.26  | -0.35 | -0.80 | 0.07  | -0.27                 | 0.72  |                       |   |   |
| HILICneg_183.036_6.18  | 4  | HILIC | neg        | 6.18            | 183.0360   |            |      | 4        |         | 0.57686                                 | 0.81658 | -0.22  | 0.03  | 0.40  | 0.09                  | 0.08  | -0.34                 | 0.97785 | 0.99726 | 0.03                       | 0.38  | 0.05  | 0.28  | -0.07 | -0.13                 | -0.18 |                       |   |   |
| RPneg_183.06651_6.19   | 4  | RP    | neg        | 6.19            | 183.0665   |            |      | 4        |         | 0.28006                                 | 0.61451 | 0.19   | 0.25  | 0.31  | 0.40                  | 0.44  | 0.14                  | 0.23617 | 0.75417 | -0.14                      | -0.20 | -0.03 | -0.20 | -0.09 | -0.17                 | -0.13 |                       |   |   |
| RPpos_183.1019_13.15   | 4  | RP    | pos        | 13.15           | 183.1019   |            |      | 4        |         | 0.11226                                 | 0.44778 | -0.48  | -0.48 | 0.55  | -0.58                 |       |                       |         |         |                            |       |       |       |       |                       |       |                       |   |   |



| Feature_ID             | Mode  | Ionization | Average_Rt.min. | Average_Mz | Metabolite | MSMS | ID_Level | HMDB_ID | IV-Alcohol self-administration (IV-ASA) |         |       |        |       |       |                       |       |         |         |       |       | IV-Alcohol clamp (IV-AC)   |       |       |       |       |   |                       |   |   |         |   |   |
|------------------------|-------|------------|-----------------|------------|------------|------|----------|---------|-----------------------------------------|---------|-------|--------|-------|-------|-----------------------|-------|---------|---------|-------|-------|----------------------------|-------|-------|-------|-------|---|-----------------------|---|---|---------|---|---|
|                        |       |            |                 |            |            |      |          |         | Area Under the Curve (AUC)              |         |       |        |       |       | IV-Ghrelin or Placebo |       |         |         |       |       | Area Under the Curve (AUC) |       |       |       |       |   | IV-Ghrelin or Placebo |   |   |         |   |   |
|                        |       |            |                 |            |            |      |          |         | Baseline                                |         |       | IV-ASA |       |       | Ghrelin               |       |         | Placebo |       |       | Baseline                   |       |       | IV-AC |       |   | Ghrelin               |   |   | Placebo |   |   |
|                        |       |            |                 |            |            |      |          |         | p                                       | q       | d     | d      | d     | d     | d                     | d     | d       | d       | d     | d     | p                          | q     | d     | d     | d     | d | d                     | d | d | d       | d | d |
| HILICneg_185.0823_0.96 | HILIC | neg        | 0.96            | 185.0823   |            |      | 4        |         | 0.97698                                 | 0.99097 | -0.02 | -0.01  | 0.26  | 0.07  | 0.19                  | -0.12 | 0.52835 | 0.91029 | 0.11  | 0.09  | 0.25                       | 0.16  | 0.08  | -0.10 | 0.26  |   |                       |   |   |         |   |   |
| RPneg_185.11839_6.673  | RP    | neg        | 6.673           | 185.1184   |            |      | 4        |         | 0.44028                                 | 0.73733 | 0.28  | 0.19   | 0.34  | 0.91  | 0.30                  | -0.03 | 0.12772 | 0.61925 | 0.62  | 0.26  | 0.00                       | 0.73  | 0.88  | 0.32  | 0.37  |   |                       |   |   |         |   |   |
| RPneg_185.11842_7.03   | RP    | neg        | 7.03            | 185.1184   |            |      | 4        |         | 0.81724                                 | 0.93044 | -0.05 | 0.04   | 0.07  | 0.01  | 0.29                  | 0.09  | 0.08421 | 0.53914 | 0.33  | 0.42  | 0.16                       | 0.51  | 0.55  | 0.29  | 0.29  |   |                       |   |   |         |   |   |
| HILICneg_185.1185_0.58 | HILIC | neg        | 0.58            | 185.1185   |            |      | 4        |         | 0.01335                                 | 0.20557 | 0.60  | 0.26   | 0.79  | 0.98  | 0.38                  | 0.36  | 0.00135 | 0.06789 | 0.64  | 0.27  | 0.56                       | 0.85  | 0.57  | 0.56  | 0.54  |   |                       |   |   |         |   |   |
| RPneg_185.11861_8.304  | RP    | neg        | 8.304           | 185.1186   |            |      | 4        |         | 0.02099                                 | 0.26112 | 0.64  | 0.27   | 0.84  | 1.01  | 0.37                  | -0.07 | 0.00199 | 0.08429 | 0.80  | 0.60  | 0.54                       | 1.01  | 0.83  | 0.97  | 0.72  |   |                       |   |   |         |   |   |
| RPneg_185.1188_7.818   | RP    | neg        | 7.818           | 185.1188   |            |      | 4        |         | 0.20899                                 | 0.55161 | 0.45  | 0.85   | 1.23  | 0.79  | 0.34                  | -0.33 | 0.23976 | 0.65656 | 0.79  | 0.24  | 0.90                       | 0.68  | 1.05  | 0.93  | -0.16 |   |                       |   |   |         |   |   |
| RPneg_185.1188_7.884   | RP    | neg        | 7.884           | 185.1188   |            |      | 4        |         | 0.87396                                 | 0.95270 | 0.07  | 0.16   | 0.35  | -0.04 | 0.49                  | 0.30  | 0.00821 | 0.19344 | 0.90  | 0.36  | 0.43                       | 0.32  | 0.76  | 0.87  | 0.34  |   |                       |   |   |         |   |   |
| RPneg_185.11882_6.524  | RP    | neg        | 6.524           | 185.1188   |            |      | 4        |         | 0.05262                                 | 0.35074 | 0.59  | 0.77   | 1.34  | 0.74  | 0.70                  | 0.41  | 0.03010 | 0.36201 | 0.35  | 0.23  | 0.20                       | 0.46  | 0.25  | 0.65  | 0.24  |   |                       |   |   |         |   |   |
| HILICpos_185.1281_0.62 | HILIC | pos        | 0.62            | 185.1281   |            |      | 4        |         | 0.07931                                 | 0.40266 | -0.18 | -0.07  | -0.07 | 0.13  | -0.08                 | -0.61 | 0.29963 | 0.80176 | -0.15 | -0.10 | -0.19                      | -0.14 | -0.22 | -0.09 | 0.06  |   |                       |   |   |         |   |   |
| RPpos_185.1283_2.31    | RP    | pos        | 2.31            | 185.1283   |            |      | 4        |         | 0.12534                                 | 0.46115 | -0.13 | 0.06   | 0.10  | -0.07 | 0.01                  | -0.48 | 0.39930 | 0.85782 | -0.12 | -0.07 | -0.05                      | -0.14 | -0.14 | -0.12 | -0.15 |   |                       |   |   |         |   |   |
| RPpos_185.129_2.71     | RP    | pos        | 2.71            | 185.1290   |            |      | 4        |         | 0.12100                                 | 0.45664 | -0.12 | 0.03   | 0.12  | -0.02 | 0.00                  | -0.55 | 0.31787 | 0.81407 | -0.15 | -0.12 | -0.12                      | -0.18 | -0.10 | -0.14 | -0.21 |   |                       |   |   |         |   |   |
| RPneg_185.15485_8.423  | RP    | neg        | 8.423           | 185.1549   |            |      | 4        |         | 0.15798                                 | 0.50099 | -0.46 | 0.39   | 0.48  | -0.20 | -0.47                 | 0.37  | 0.57104 | 0.92159 | -0.03 | 0.28  | 0.11                       | -0.12 | -0.09 | -0.07 | -0.14 |   |                       |   |   |         |   |   |
| HILICpos_185.1648_1.48 | HILIC | pos        | 1.48            | 185.1648   |            |      | 4        |         | 0.11455                                 | 0.45017 | 1.45  | 0.13   | 0.82  | 4.43  | 0.26                  | 0.38  | 0.06383 | 0.48998 | 0.58  | 0.34  | 2.13                       | 1.05  | 0.83  | 0.76  | -0.47 |   |                       |   |   |         |   |   |
| HILICneg_185.8454_1.42 | HILIC | neg        | 1.42            | 185.8454   |            |      | 4        |         | 0.37862                                 | 0.69334 | -0.22 | 0.08   | -0.05 | 0.42  | 0.12                  | 0.51  | 0.05719 | 0.47046 | 0.40  | 0.22  | 0.30                       | 0.95  | -0.26 | 0.50  | 0.93  |   |                       |   |   |         |   |   |
| HILICneg_185.8459_7.39 | HILIC | neg        | 7.39            | 185.8459   |            |      | 4        |         | 0.72637                                 | 0.88845 | -0.12 | 0.27   | 0.44  | 0.05  | 0.26                  | -0.32 | 0.70012 | 0.95161 | -0.20 | -1.43 | 0.74                       | -0.53 | -0.02 | 0.05  | 0.47  |   |                       |   |   |         |   |   |
| HILICneg_185.8459_0.54 | HILIC | neg        | 0.54            | 185.8459   |            |      | 4        |         | 0.15631                                 | 0.49930 | -0.46 | -0.15  | -0.85 | 0.41  | -0.26                 | 0.13  | 0.02246 | 0.31673 | 0.57  | 1.17  | -0.49                      | 0.16  | 0.84  | 1.15  | 1.29  |   |                       |   |   |         |   |   |
| HILICneg_185.9598_5.33 | HILIC | pos        | 5.33            | 185.9598   |            |      | 4        |         | 0.02207                                 | 0.26503 | -0.50 | -0.40  | -0.16 | 0.04  | -0.41                 | -0.73 | 0.35701 | 0.83402 | -0.27 | -0.22 | 0.65                       | -0.07 | -0.34 | -0.44 | -0.39 |   |                       |   |   |         |   |   |
| RPneg_185.96281_1.053  | RP    | neg        | 1.053           | 185.9628   |            |      | 4        |         | 0.21938                                 | 0.56138 | 0.45  | 0.73   | 0.24  | 0.52  | 0.85                  | 0.50  | 0.37315 | 0.98145 | -0.08 | -0.09 | -0.12                      | 0.06  | -0.17 | -0.15 | 0.14  |   |                       |   |   |         |   |   |
| HILICneg_185.9633_0.68 | HILIC | neg        | 0.68            | 185.9633   |            |      | 4        |         | 0.28699                                 | 0.62057 | 0.28  | 0.00   | 0.70  | 0.01  | 0.37                  | 0.11  | 0.36929 | 0.8699  | 0.06  | 0.31  | 0.88                       | 3.68  | 2.76  | 0.40  | -0.04 |   |                       |   |   |         |   |   |
| HILICneg_185.9944_4.33 | HILIC | neg        | 4.33            | 185.9944   |            |      | 4        |         | 0.19810                                 | 0.54264 | -0.24 | 0.27   | 0.33  | -0.13 | -0.11                 | -0.20 | 0.01751 | 0.28231 | 0.18  | 0.10  | 0.09                       | 0.23  | 0.40  | 0.15  | -0.08 |   |                       |   |   |         |   |   |
| HILICneg_186.0388_5.85 | HILIC | neg        | 5.85            | 186.0388   |            |      | 4        |         | 0.97137                                 | 0.98927 | 0.66  | 0.43   | 0.77  | 0.26  | 0.14                  | -0.68 | 0.03940 | 0.40449 | 1.09  | 0.87  | 1.09                       | 1.30  | 0.92  | 0.61  | -0.15 |   |                       |   |   |         |   |   |
| RPneg_186.05643_2.942  | RP    | neg        | 2.942           | 186.0564   |            |      | 4        |         | 0.98077                                 | 0.99266 | -0.23 | -0.15  | -0.11 | -0.19 | -0.25                 | -0.07 | 0.24395 | 0.76006 | 0.05  | 0.02  | 0.01                       | 0.15  | 0.08  | 0.00  | -0.06 |   |                       |   |   |         |   |   |
| HILICneg_186.0565_1.44 | HILIC | neg        | 1.44            | 186.0565   |            |      | 4        |         | 0.79646                                 | 0.92130 | -0.23 | -0.16  | -0.15 | -0.19 | -0.21                 | -0.07 | 0.32928 | 0.82035 | 0.05  | -0.03 | 0.02                       | 0.11  | 0.06  | 0.05  | -0.04 |   |                       |   |   |         |   |   |
| HILICpos_186.0875_5.14 | HILIC | pos        | 5.14            | 186.0875   |            |      | 4        |         | 0.70824                                 | 0.88085 | -0.02 | -0.17  | 0.21  | -0.12 | 0.08                  | 0.44  | 0.60578 | 0.92920 | 0.03  | 0.08  | -0.02                      | 0.56  | 0.07  | -0.08 | -0.09 |   |                       |   |   |         |   |   |
| HILICneg_186.1061_5.41 | HILIC | pos        | 5.41            | 186.1061   |            |      | 4        |         | 0.72172                                 | 0.88633 | -0.14 | 0.36   | 1.09  | -0.21 | -0.25                 | 0.48  | 0.71044 | 0.95280 | 0.07  | -0.01 | 0.22                       | 1.05  | 0.28  | 0.77  | -0.33 |   |                       |   |   |         |   |   |
| HILICpos_186.1121_4.53 | HILIC | pos        | 4.53            | 186.1121   |            |      | 4        |         | 0.07580                                 | 0.39583 | -0.17 | -0.01  | -0.04 | -0.11 | -0.08                 | -0.18 | 0.89524 | 0.98465 | -0.06 | -0.12 | -0.10                      | 0.05  | -0.02 | -0.08 | -0.18 |   |                       |   |   |         |   |   |
| HILICpos_186.1124_3.92 | HILIC | pos        | 3.92            | 186.1124   |            |      | 4        |         | 0.46035                                 | 0.75115 | -0.06 | 0.17   | 0.23  | 0.22  | 0.09                  | -0.40 | 0.51442 | 0.90649 | -0.10 | -0.14 | -0.06                      | -0.03 | -0.04 | -0.11 | -0.31 |   |                       |   |   |         |   |   |
| HILICpos_186.1125_1.82 | HILIC | pos        | 1.82            | 186.1125   |            |      | 4        |         | 0.04585                                 | 0.33705 | 0.11  | 0.06   | 0.16  | 0.18  | 0.28                  | -0.22 | 0.81247 | 0.97170 | -0.07 | -0.07 | -0.05                      | -0.02 | -0.04 | -0.12 | -0.21 |   |                       |   |   |         |   |   |
| HILICpos_186.1127_1.93 | HILIC | pos        | 1.93            | 186.1127   |            |      | 4        |         | 0.47506                                 | 0.76085 | 0.22  | 0.18   | 0.87  | 0.68  | 0.79                  | 0.03  | 0.08619 | 0.54404 | 0.52  | 0.25  | 0.67                       | 0.59  | 0.76  | 0.13  | -0.02 |   |                       |   |   |         |   |   |
| HILICpos_186.1487_2.14 | HILIC | pos        | 2.14            | 186.1487   |            |      | 4        |         | 0.99698                                 | 0.99885 | 0.03  | 0.18   | 0.38  | 0.20  | -0.10                 | 0.14  | 0.67824 | 0.94718 | -0.16 | -0.48 | 0.08                       | 0.03  | -0.30 | -0.10 | -0.57 |   |                       |   |   |         |   |   |
| HILICneg_186.8981_0.93 | HILIC | neg        | 0.93            | 186.8981   |            |      | 4        |         | 0.25005                                 | 0.58900 | -0.26 | -0.24  | -0.13 | -0.02 | -0.32                 | 0.04  | 0.21203 | 0.72887 | -0.28 | -0.42 | -0.27                      | -0.22 | -0.21 | -0.30 | 0.15  |   |                       |   |   |         |   |   |
| HILICneg_186.9343_5.69 | HILIC | neg        | 5.69            | 186.9343   |            |      | 4        |         | 0.89960                                 | 0.96330 | 0.02  | 0.30   | 0.60  | 0.09  | 0.08                  | -0.09 | 0.01716 | 0.27969 | 0.40  | 0.09  | 0.41                       | 0.68  | 0.31  | 0.40  | -0.41 |   |                       |   |   |         |   |   |
| HILICneg_186.9345_5.85 | HILIC | neg        | 5.85            | 186.9345   |            |      | 4        |         | 0.89428                                 | 0.99806 | 0.05  | 0.47   | 0.61  | 0.37  | 0.13                  | -0.48 | 0.11006 | 0.59153 | 0.71  | 0.59  | 1.00                       | 0.66  | 0.43  | 0.13  | -0.13 |   |                       |   |   |         |   |   |
| HILICpos_186.9806_0.94 | HILIC | pos        | 0.94            | 186.9806   |            |      | 4        |         | 0.77110                                 | 0.91017 | -0.11 | 0.04   | 0.30  | 0.14  | 0.20                  | -0.42 | 0.02490 | 0.33219 | -0.28 | 0.09  | -0.36                      | -0.36 | 0.01  | -0.42 | -0.44 |   |                       |   |   |         |   |   |
| RPneg_186.9809_4.97    | RP    | neg        | 4.97            | 186.9810   |            |      | 4        |         | 0.44505                                 | 0.74083 | 0.01  | 0.16   | 0.25  | -0.06 | 0.13                  | 0.03  | 0.55027 | 0.91742 | -0.06 | -0.13 | -0.09                      | -0.08 | -0.02 | -0.06 | 0.04  |   |                       |   |   |         |   |   |
| HILICneg_187.0071_0.96 | HILIC | neg        | 0.96            | 187.0071   |            |      | 4        |         | 0.03669                                 | 0.31209 | 0.70  | 0.66   | 0.98  | 0.58  | 0.59                  | 0.98  | 0.12183 | 0.60974 | -0.61 | -0.60 | -0.59                      | -0.55 | -0.56 | -0.63 | -0.52 |   |                       |   |   |         |   |   |
| RPneg_187.00735_3.192  | RP    | neg        | 3.192           | 187.0074   |            |      | 4        |         | 0.15300                                 | 0.49597 | 0.82  | 0.11   | 1.90  | 0.70  | 1.25                  | 0.64  | 0.37287 | 0.84231 | 0.47  | 0.02  | 0.60                       | 0.96  | 0.50  | -0.27 | 0.19  |   |                       |   |   |         |   |   |
| RPneg_187.00764_3.589  | RP    | neg        | 3.589           | 187.0076   |            |      | 4        |         | 0.83727                                 | 0.93874 | 0.05  | -0.12  | 0.05  | 0.11  | 0.44                  | 0.37  | 0.14202 | 0.64445 | -0.36 | -0.26 | -0.41                      | -0.21 | -0.30 | -0.40 | -0.29 |   |                       |   |   |         |   |   |
| HILICneg_187.0145_0.87 | HILIC | neg        | 0.87            | 187.0145   |            |      | 4        |         | 0.24016                                 | 0.58122 | -0.30 | 0.17   | 0.27  | 0.46  | -0.87                 | -0.44 | 0.45256 | 0.88300 | 0.26  | 0.33  | 0.02                       | 0.25  | 0.35  | 0.38  | -0.03 |   |                       |   |   |         |   |   |
| HILICpos_187.03_6.13   | HILIC | pos        | 6.13            | 187.0300   |            |      | 4        |         | 0.51981                                 | 0.78761 | -0.23 | 0.28   | 0.17  | 0.01  | -0.05                 | 0.16  | 0.31866 | 0.81449 | 0.09  | 0.78  | 0.27                       | 0.30  | -0.24 | 0.04  | -0.51 |   |                       |   |   |         |   |   |
| HILICneg_187.0379_3.33 | HILIC | neg        | 3.33            | 187.0379   |            |      | 4        |         | 0.59155                                 | 0.82476 | -0.17 | 0.06   | -0.18 | -0.23 | 0.02                  | -0.24 | 0.08049 | 0.53137 | -0.32 | -0.02 | -0.05                      | -0.04 | -0.27 | -0.55 | -0.22 |   |                       |   |   |         |   |   |
| HILICpos_187.0577_2.67 | HILIC | pos        | 2.67            | 187.0577   |            |      | 4        |         | 0.14691                                 | 0.48845 | 0.54  | 0.12   | 0.60  | 0.84  | 1.18                  | -0.07 | 0.97672 | 0.99719 | -0.01 | 0.00  | -0.05                      | -0.01 | -0.04 | -0.04 | -0.11 |   |                       |   |   |         |   |   |
| HILICneg_187.0725_5.15 | HILIC | neg        | 5.15            | 187.0725   |            |      | 4        |         | 0.43150                                 | 0.73104 | 0.26  | 0.03   | 0.58  | 0.49  | 0.40                  | 0.07  | 0.00652 | 0.17090 | 0.38  | -0.22 | 0.39                       | 0.49  | 0.47  | 0.38  | 0.32  |   |                       |   |   |         |   |   |
| RPneg_187.07465_3.73   | RP    | neg        | 3.73            | 187.0747   |            |      | 4        |         | 0.06857                                 | 0.38092 | 0.59  | 0.34   | 1.44  | 0.52  |                       |       |         |         |       |       |                            |       |       |       |       |   |                       |   |   |         |   |   |



| IV-Alcohol self-administration (IV-ASA) |       |            |                 |            |            |      |          |         |                            | IV-Alcohol clamp (IV-AC) |       |       |       |        |       |       |         |         |                       |       |       |       |       |        |       |   |   |   |
|-----------------------------------------|-------|------------|-----------------|------------|------------|------|----------|---------|----------------------------|--------------------------|-------|-------|-------|--------|-------|-------|---------|---------|-----------------------|-------|-------|-------|-------|--------|-------|---|---|---|
| Feature_ID                              | Mode  | Ionization | Average_Rt.min. | Average_Mz | Metabolite | MSMS | ID_Level | HMDB_ID | Area Under the Curve (AUC) |                          |       |       |       |        |       |       |         |         |                       |       |       |       |       |        |       |   |   |   |
|                                         |       |            |                 |            |            |      |          |         | IV-Ghrelin or Placebo      |                          |       |       |       | BrAC=0 |       |       |         |         | IV-Ghrelin or Placebo |       |       |       |       | BrAC=0 |       |   |   |   |
|                                         |       |            |                 |            |            |      |          |         | p                          | q                        | d     | d     | d     | d      | d     | d     | d       | d       | p                     | q     | d     | d     | d     | d      | d     | d | d | d |
| HILICpos_188.1278_4.7                   | HILIC | pos        | 4.7             | 188.1278   |            |      | 4        |         | 0.18188                    | 0.52784                  | -0.17 | -0.05 | -0.21 | -0.10  | -0.07 | 0.19  | 0.61780 | 0.93244 | -0.10                 | -0.09 | -0.09 | -0.08 | -0.12 | -0.09  | -0.13 |   |   |   |
| HILICpos_188.1282_3.76                  | HILIC | pos        | 3.76            | 188.1282   |            |      | 4        |         | 0.30939                    | 0.63790                  | -0.20 | 0.03  | 0.37  | -0.03  | -0.23 | -0.26 | 0.96391 | 0.99621 | 0.22                  | 0.16  | 0.17  | 0.53  | 0.21  | 0.30   | -0.34 |   |   |   |
| HILICpos_188.1282_3.91                  | HILIC | pos        | 3.91            | 188.1282   |            |      | 4        |         | 0.31308                    | 0.64115                  | -0.17 | 0.05  | 0.17  | 0.04   | -0.16 | -0.10 | 0.77314 | 0.96458 | 0.06                  | -0.03 | 0.03  | 0.23  | 0.11  | 0.18   | -0.26 |   |   |   |
| HILICpos_188.1393_6.68                  | HILIC | pos        | 6.68            | 188.1393   |            |      | 4        |         | 0.25170                    | 0.59074                  | -0.06 | -0.05 | 0.25  | -0.04  | 0.06  | -0.06 | 0.07814 | 0.52548 | 0.58                  | 0.24  | 0.22  | 0.82  | 0.71  | 0.17   | 0.67  |   |   |   |
| HILICpos_188.1394_3.4                   | HILIC | pos        | 3.4             | 188.1394   |            |      | 4        |         | 0.15191                    | 0.45735                  | 0.15  | 0.29  | 0.53  | 0.48   | -0.05 | -0.24 | 0.83386 | 0.80313 | -0.15                 | -0.07 | -0.73 | 0.17  | -0.12 | -0.05  | -0.11 |   |   |   |
| HILICpos_188.1759_6.19                  | HILIC | pos        | 6.19            | 188.1759   |            |      | 4        |         | 0.02634                    | 0.15623                  | 0.63  | -0.4  | -0.52 | -0.52  | -0.45 | -0.45 | 0.08439 | 0.07511 | -0.02                 | -0.09 | 0.15  | 0.35  | 0.10  | -0.17  | -0.22 |   |   |   |
| HILICneg_188.895_0.93                   | HILIC | neg        | 0.93            | 188.8950   |            |      | 4        |         | 0.47962                    | 0.76374                  | -0.19 | -0.22 | -0.15 | 0.18   | -0.21 | 0.00  | 0.14316 | 0.64560 | -0.29                 | -0.40 | -0.24 | 0.43  | -0.24 | -0.21  | -0.27 |   |   |   |
| HILICpos_188.9076_2.97                  | HILIC | pos        | 2.97            | 188.9076   |            |      | 4        |         | 0.32293                    | 0.64892                  | -0.29 | 0.10  | 0.39  | -0.22  | -0.31 | 1.14  | 0.61230 | 0.93066 | -0.16                 | -0.14 | 0.07  | 0.83  | 0.08  | -0.09  | -0.40 |   |   |   |
| RPneg_188.95192_13.184                  | RP    | neg        | 13.184          | 188.9519   |            |      | 4        |         | 0.47232                    | 0.75902                  | -0.16 | 0.04  | -0.15 | -0.34  | 0.50  | 0.37  | 0.50243 | 0.90280 | -0.06                 | 0.50  | -0.13 | -0.12 | -0.51 | 0.36   | -0.01 |   |   |   |
| HILICpos_188.9786_0.94                  | HILIC | pos        | 0.94            | 188.9786   |            |      | 4        |         | 0.48031                    | 0.76416                  | 0.16  | -0.02 | 0.48  | 0.17   | 0.74  | -0.48 | 0.02524 | 0.33465 | -0.33                 | -0.25 | -0.65 | -0.12 | 0.33  | -0.40  | -0.51 |   |   |   |
| RPneg_188.98651_2.08                    | RP    | neg        | 2.08            | 188.9865   |            |      | 4        |         | 0.31528                    | 0.64272                  | 0.10  | 0.14  | 0.37  | 0.26   | 0.13  | 0.09  | 0.29178 | 0.79623 | -0.38                 | -0.43 | -0.41 | -0.31 | -0.28 | -0.32  | -0.30 |   |   |   |
| HILICneg_188.9869_0.47                  | HILIC | neg        | 0.47            | 188.9869   |            |      | 4        |         | 0.30352                    | 0.63263                  | 0.06  | 0.08  | 0.32  | 0.19   | 0.06  | 0.16  | 0.66377 | 0.94310 | -0.22                 | -0.41 | -0.34 | -0.23 | -0.08 | -0.06  | -0.21 |   |   |   |
| RPneg_189.00267_3.731                   | RP    | neg        | 3.731           | 189.0027   |            |      | 4        |         | 0.07453                    | 0.39314                  | 0.46  | 0.43  | 0.57  | 0.41   | 0.46  | 0.84  | 0.18340 | 0.69961 | -0.55                 | -0.54 | -0.51 | -0.56 | -0.54 | -0.51  | -0.40 |   |   |   |
| HILICpos_189.0038_5.7                   | HILIC | pos        | 5.7             | 189.0038   |            |      | 4        |         | 0.37094                    | 0.68703                  | -0.03 | 0.05  | 0.20  | 0.08   | 0.09  | -0.05 | 0.21371 | 0.73058 | -0.22                 | -0.19 | -0.14 | -0.16 | -0.32 | -0.22  | -0.25 |   |   |   |
| HILICneg_189.005_6.29                   | HILIC | neg        | 6.29            | 189.0050   |            |      | 4        |         | 0.71499                    | 0.88406                  | -0.07 | 0.16  | 0.62  | 0.37   | -0.12 | -0.76 | 0.03312 | 0.37399 | 0.48                  | 0.42  | 0.51  | 1.02  | 0.36  | -0.02  | -0.63 |   |   |   |
| HILICpos_189.0301_5.33                  | HILIC | pos        | 5.33            | 189.0301   |            |      | 4        |         | 0.89400                    | 0.96169                  | 0.01  | 0.48  | 0.32  | 0.18   | 0.44  | 0.64  | 0.05992 | 0.48016 | 0.14                  | -0.30 | 0.22  | 0.03  | 0.29  | 0.43   | -0.71 |   |   |   |
| HILICneg_189.0356_3.33                  | HILIC | neg        | 3.33            | 189.0356   |            |      | 4        |         | 0.57983                    | 0.81821                  | -0.18 | 0.18  | -0.19 | -0.17  | -0.02 | -0.35 | 0.04319 | 0.41886 | -0.36                 | -0.07 | -0.08 | -0.15 | -0.25 | -0.64  | -0.19 |   |   |   |
| HILICneg_189.0405_1.26                  | HILIC | neg        | 1.26            | 189.0405   |            |      | 4        |         | 0.03033                    | 0.19809                  | -0.57 | 0.14  | -0.19 | 0.08   | -0.43 | -0.58 | 0.69062 | 0.95008 | 0.26                  | 0.26  | -0.18 | -0.15 | 0.53  | 0.19   | -0.02 |   |   |   |
| HILICneg_189.0407_5.69                  | HILIC | neg        | 5.69            | 189.0407   |            |      | 4        |         | 0.92055                    | 0.96410                  | -0.07 | 0.11  | 0.79  | 0.48   | -0.06 | -0.63 | 0.02818 | 0.35067 | 0.46                  | 0.48  | 0.73  | 0.62  | 0.42  | 0.52   | 0.37  |   |   |   |
| RPneg_189.0407_3.21                     | RP    | neg        | 3.21            | 189.0407   |            |      | 4        |         | 0.25890                    | 0.59691                  | -0.20 | 0.02  | -0.01 | 0.13   | 0.13  | -0.69 | 0.39939 | 0.85782 | -0.01                 | 0.14  | 0.07  | 0.00  | 0.02  | 0.12   | -0.05 |   |   |   |
| RPneg_189.041_1.231                     | RP    | neg        | 1.231           | 189.0410   |            |      | 4        |         | 0.57372                    | 0.81586                  | -0.07 | 0.03  | 0.29  | 0.32   | 0.24  | -1.09 | 0.27207 | 0.78288 | 0.50                  | 0.86  | 0.66  | 0.77  | 0.52  | 0.62   | 0.12  |   |   |   |
| HILICneg_189.0411_0.96                  | HILIC | neg        | 0.96            | 189.0411   |            |      | 4        |         | 0.64908                    | 0.85156                  | 0.13  | 0.41  | 0.26  | 0.35   | 0.38  | -0.26 | 0.23576 | 0.75355 | -0.16                 | -0.07 | -0.27 | -0.18 | -0.26 | -0.05  | 0.05  |   |   |   |
| RPpos_189.0785_5.95                     | RP    | pos        | 5.95            | 189.0785   |            |      | 4        |         | 0.41688                    | 0.72098                  | 0.19  | 0.35  | 0.34  | 0.30   | 0.42  | 0.02  | 0.54164 | 0.91464 | -0.09                 | -0.19 | -0.16 | -0.14 | -0.12 | -0.14  | 0.27  |   |   |   |
| HILICpos_189.0871_5.03                  | HILIC | pos        | 5.03            | 189.0871   |            |      | 4        |         | 0.76421                    | 0.90706                  | 0.15  | 0.01  | 0.34  | 0.33   | 0.38  | 0.38  | 0.26226 | 0.77484 | 0.27                  | 0.03  | 0.38  | 0.20  | 0.87  | 0.39   | 0.00  |   |   |   |
| HILICneg_189.0882_6.16                  | HILIC | neg        | 6.16            | 189.0882   |            |      | 4        |         | 0.08839                    | 0.41611                  | -0.21 | -0.10 | -0.05 | -0.23  | -0.11 | -0.22 | 0.10987 | 0.59132 | 0.04                  | 0.15  | 0.05  | 0.12  | -0.02 | -0.04  | 0.01  |   |   |   |
| HILICneg_189.1133_0.6                   | HILIC | neg        | 0.6             | 189.1133   |            |      | 4        |         | 0.57112                    | 0.81468                  | -0.17 | -0.14 | 0.60  | 0.38   | -0.26 | -0.02 | 0.87272 | 0.98135 | -0.16                 | 0.12  | 1.17  | -1.03 | 0.47  | -0.05  | -0.26 |   |   |   |
| RPneg_189.1137_5.572                    | RP    | neg        | 5.572           | 189.1137   |            |      | 4        |         | 0.37774                    | 0.69276                  | -0.27 | -0.18 | 0.70  | 0.00   | -0.20 | 0.18  | 0.79032 | 0.96713 | -0.26                 | -0.24 | 0.62  | -0.98 | 0.63  | -0.26  | -0.06 |   |   |   |
| RPneg_189.11368_5.731                   | RP    | neg        | 5.731           | 189.1137   |            |      | 4        |         | 0.09191                    | 0.42064                  | -0.56 | -0.13 | 0.84  | 0.07   | -0.21 | -0.16 | 0.99134 | 0.99863 | 0.00                  | -0.03 | 1.06  | -0.96 | 0.53  | 0.06   | -0.18 |   |   |   |
| HILICpos_189.1231_5.17                  | HILIC | pos        | 5.17            | 189.1231   |            |      | 4        |         | 0.73572                    | 0.89335                  | 0.14  | 0.08  | 0.78  | 0.15   | 0.24  | 0.35  | 0.68567 | 0.94884 | -0.01                 | -0.23 | -0.04 | 0.07  | 0.23  | 0.04   | -0.11 |   |   |   |
| HILICpos_189.1236_5.81                  | HILIC | pos        | 5.81            | 189.1236   |            |      | 4        |         | 0.50854                    | 0.78140                  | 0.28  | 0.44  | 0.66  | 0.47   | 0.32  | -0.38 | 0.26118 | 0.77484 | 0.29                  | 0.30  | 0.48  | 0.43  | 0.32  | 0.16   | -0.25 |   |   |   |
| HILICpos_189.1594_6.94                  | HILIC | pos        | 6.94            | 189.1594   |            |      | 4        |         | 0.89957                    | 0.96330                  | 0.02  | 0.25  | 0.10  | 0.54   | 0.00  | -0.25 | 0.91514 | 0.98770 | -0.05                 | -0.06 | -0.05 | 0.18  | -0.10 | -0.05  | -0.24 |   |   |   |
| HILICneg_189.8583_0.41                  | HILIC | neg        | 0.41            | 189.8583   |            |      | 4        |         | 0.85816                    | 0.94671                  | 0.08  | 0.17  | 0.13  | -0.10  | 0.72  | 0.14  | 0.71719 | 0.95462 | -0.07                 | -0.35 | -0.15 | -0.04 | 0.25  | -0.18  | -0.05 |   |   |   |
| RPneg_189.8587_7.43                     | RP    | neg        | 7.43            | 189.8585   |            |      | 4        |         | 0.05575                    | 0.35798                  | 0.41  | -0.18 | 0.20  | -0.56  | 0.02  | 0.20  | 0.66614 | 0.94404 | -0.08                 | -0.42 | -0.07 | -0.22 | 0.15  | 0.19   | 0.00  |   |   |   |
| RPneg_189.9322_15.407                   | RP    | neg        | 15.407          | 189.9322   |            |      | 4        |         | 0.11203                    | 0.44753                  | -0.43 | -0.70 | 0.29  | 0.05   | 0.26  | -0.22 | 0.46500 | 0.88746 | 0.23                  | -0.31 | 0.43  | 0.41  | 0.24  | -0.51  | 0.48  |   |   |   |
| RPneg_189.98344_3.363                   | RP    | neg        | 3.363           | 189.9834   |            |      | 4        |         | 0.17782                    | 0.52349                  | 1.08  | 0.89  | 1.38  | 1.10   | 1.51  | 0.21  | 0.03824 | 0.39897 | 0.57                  | 0.58  | 0.80  | 0.52  | 0.20  | 0.62   | 0.33  |   |   |   |
| HILICpos_189.9874_4.18                  | HILIC | pos        | 4.18            | 189.9874   |            |      | 4        |         | 0.29253                    | 0.62497                  | -0.11 | 0.01  | 0.16  | -0.18  | 0.10  | -0.10 | 0.05403 | 0.46076 | 0.08                  | 0.35  | 0.12  | 0.00  | 0.10  | 0.09   | -0.19 |   |   |   |
| RPpos_189.9924_1.05                     | RP    | pos        | 1.05            | 189.9924   |            |      | 4        |         | 0.71612                    | 0.88449                  | 0.08  | -0.20 | -0.05 | 0.18   | 0.56  | -0.15 | 0.14739 | 0.65072 | 0.66                  | -0.02 | 0.48  | 0.63  | 0.60  | 0.01   | 0.34  |   |   |   |
| RPpos_189.9925_1.6                      | RP    | pos        | 1.6             | 189.9925   |            |      | 4        |         | 0.74532                    | 0.89860                  | 0.07  | -0.10 | 0.15  | 0.22   | 0.37  | -0.05 | 0.13236 | 0.62840 | 0.52                  | -0.01 | 0.34  | 0.38  | 0.90  | 0.34   | 0.45  |   |   |   |
| HILICneg_190.0182_5.62                  | HILIC | neg        | 5.62            | 190.0182   |            |      | 4        |         | 0.14992                    | 0.49235                  | -0.34 | -0.17 | 0.07  | -0.21  | -0.32 | -0.33 | 0.15452 | 0.66058 | -0.07                 | -0.15 | -0.06 | 0.43  | -0.05 | -0.31  | -0.44 |   |   |   |
| HILICneg_190.0393_7.11                  | HILIC | neg        | 7.11            | 190.0393   |            |      | 4        |         | 0.74880                    | 0.90000                  | 0.09  | 0.45  | 0.75  | 0.14   | -0.23 | -0.48 | 0.01591 | 0.27002 | 0.57                  | 0.86  | 0.72  | 1.55  | 0.41  | 0.05   | -0.31 |   |   |   |
| HILICpos_190.0499_2.32                  | HILIC | pos        | 2.32            | 190.0499   |            |      | 4        |         | 0.09074                    | 0.41967                  | 0.42  | 0.00  | 1.04  | 0.56   | 0.35  | -0.31 | 0.14783 | 0.65121 | 0.37                  | 0.03  | 0.32  | 0.49  | 0.87  | 0.12   | -0.65 |   |   |   |
| RPneg_190.05109_5.313                   | RP    | neg        | 5.313           | 190.0511   |            |      | 4        |         | 0.00043                    | 0.03792                  | -0.52 | -0.60 | -0.07 | -0.53  | -0.47 | -0.38 | 0.68031 | 0.94763 | -0.22                 | -0.42 | -0.28 | -0.30 | 0.09  | -0.05  | 0.16  |   |   |   |
| RPneg_190.05115_1.876                   | RP    | neg        | 1.876           | 190.0512   |            |      | 4        |         | 0.00400                    | 0.12882                  | -0.74 | -0.53 | -0.05 | -0.56  | -1.14 | -0.90 | 0.65071 | 0.93957 | -0.17                 | -0.15 | -0.02 | -0.26 | 0.16  | -0.22  | -0.39 |   |   |   |
| RPneg_190.05124_4.98                    | RP    | neg        | 4.98            | 190.0512   |            |      | 4        |         | 0.84317                    | 0.94123                  | -0.12 | 0.00  | 0.44  | -0.10  | -0.16 | -0.23 | 0.98060 | 0.99752 | 0.16                  | 0.16  | 0.11  | 0.37  | 0.11  | 0.18   | -0.32 |   |   |   |
| RPneg_190.05144_4.197                   | RP    | neg        | 4.197           | 190.0514   |            |      | 4        |         | 0.61678                    | 0.83716                  | 0.01  | -0.01 | 0.24  | -0.04  | -0.11 | 0.32  | 0.72127 | 0.95590 | 0.20                  | 0.26  | 0.30  | 0.36  | 0.29  | 0.19   | -0.23 |   |   |   |
| HILICneg_190.0518_0.82                  | HILIC | neg        | 0.82            | 190.0518   |            |      | 4        |         | 0.91003                    | 0.96665                  | -0.07 | -0.08 | 0.24  | -0.12  | -0.14 | -0.18 | 0.45486 | 0.88402 | -0.07                 | -0.10 | 0.06  | 0.01  | 0.02  | -0.14  | -0.23 |   |   |   |
| RPneg_190.05478_3.044                   | RP    | neg        | 3.044           | 190.0548   |            |      | 4        |         | 0.49701                    | 0.77438                  | -0.20 | 0.02  | 0.87  | -0.17  | -0.22 | 0.31  | 0.28754 | 0.79407 | 0.19                  | 0.35  | 0.29  | 0.19  | 0.40  | -0.12  | -0.25 |   |   |   |
| HILICneg_190.055_1.08                   | HILIC | neg        | 1.08            | 190.0550   |            |      | 4        |         | 0.43103                    | 0.73094                  | 0.23  | -0.03 | 1.12  | 0.31   | 0.46  | -0.02 | 0.03711 | 0.39276 | 0.41                  | 0.31  | 0.95  | 0.35  | 0.68  | 0.41   | -0.57 |   |   |   |
| HILICpos_190.0861_3.87                  | HILIC | pos        | 3.87            | 190.0861   |            |      | 4        |         | 0.45341                    | 0.74627                  | -0.16 | 0.04  | 0.67  | 0.21   | 0.02  | -1.27 | 0.00023 | 0.02200 | 1.73                  | 1.01  | 2.69  | 2.10  | 1.13  | 1.05   | 0.31  |   |   |   |

| Feature_ID             | Mode  | Ionization | Average RT.min. | Average.Mz | Metabolite | MSMS | ID_Level | HMDB_ID | IV-Alcohol self-administration (IV-ASA) |         |        |       |        |       |                       |       |         |         |       |       | IV-Alcohol clamp (IV-AC)   |       |        |       |          |   |                       |   |         |   |        |   |
|------------------------|-------|------------|-----------------|------------|------------|------|----------|---------|-----------------------------------------|---------|--------|-------|--------|-------|-----------------------|-------|---------|---------|-------|-------|----------------------------|-------|--------|-------|----------|---|-----------------------|---|---------|---|--------|---|
|                        |       |            |                 |            |            |      |          |         | Area Under the Curve (AUC)              |         |        |       |        |       | IV-Ghrelin or Placebo |       |         |         |       |       | Area Under the Curve (AUC) |       |        |       |          |   | IV-Ghrelin or Placebo |   |         |   |        |   |
|                        |       |            |                 |            |            |      |          |         | Baseline                                |         | IV-ASA |       | BrAC=0 |       | Baseline              |       | Post-LD |         | IV-AC |       | Post-AC                    |       | BrAC=0 |       | Baseline |   | IV-AC                 |   | Post-AC |   | BrAC=0 |   |
|                        |       |            |                 |            |            |      |          |         | p                                       | q       | d      | d     | d      | d     | d                     | d     | d       | d       | d     | d     | d                          | d     | d      | d     | d        | d | d                     | d | d       | d | d      | d |
| HILICpos_192.1597_1.01 | HILIC | pos        | 1.01            | 192.1597   |            |      | 4        |         | 0.27358                                 | 0.60932 | -0.23  | -0.21 | -0.21  | -0.18 | 1.17                  | -0.37 | 0.78895 | 0.96713 | -0.10 | 1.68  | 0.07                       | -0.37 | 3.17   | 0.27  | -0.37    |   |                       |   |         |   |        |   |
| HILICneg_192.8405_1.39 | HILIC | neg        | 1.39            | 192.8405   |            |      | 4        |         | 0.21541                                 | 0.55799 | -0.19  | -0.24 | -0.47  | 0.15  | 0.24                  | 0.37  | 0.08989 | 0.55360 | 0.23  | 0.22  | -0.03                      | 0.36  | 0.10   | 0.35  | 0.31     |   |                       |   |         |   |        |   |
| HILICneg_192.9123_2.67 | HILIC | neg        | 2.67            | 192.9123   |            |      | 4        |         | 0.27527                                 | 0.61067 | -0.19  | -0.07 | 0.18   | -0.02 | 0.08                  | 0.24  | 0.79565 | 0.96821 | 0.09  | -0.11 | -0.26                      | -0.21 | 0.28   | 0.31  | 0.27     |   |                       |   |         |   |        |   |
| RPneg_192.93634_1.594  | RP    | neg        | 1.594           | 192.9363   |            |      | 4        |         | 0.83173                                 | 0.93648 | 0.04   | -0.02 | 0.15   | 0.12  | 0.42                  | -0.16 | 0.11275 | 0.59553 | 0.76  | 0.56  | 0.11                       | 0.59  | 0.89   | 0.80  | 1.32     |   |                       |   |         |   |        |   |
| HILICneg_192.9819_0.67 | HILIC | neg        | 0.67            | 192.9817   |            |      | 4        |         | 0.15930                                 | 0.50283 | 0.29   | 0.20  | 0.16   | 0.15  | 0.25                  | -0.10 | 0.37701 | 0.94546 | 0.22  | -0.11 | 0.29                       | 0.85  | 0.17   | -0.12 | -0.29    |   |                       |   |         |   |        |   |
| RPneg_192.98174_1.17   | RP    | neg        | 1.17            | 192.9817   |            |      | 4        |         | 0.14831                                 | 0.49907 | -0.32  | -0.19 | -0.36  | 0.15  | 0.27                  | -0.28 | 0.30284 | 0.80388 | -0.16 | -0.19 | 0.32                       | 0.81  | 0.77   | -0.16 | -0.32    |   |                       |   |         |   |        |   |
| HILICneg_192.9901_1.42 | HILIC | neg        | 1.42            | 192.9901   |            |      | 4        |         | 0.71311                                 | 0.88319 | -0.14  | -0.12 | 0.47   | -0.30 | -0.06                 | 1.87  | 0.52739 | 0.91004 | 0.32  | -0.04 | 0.17                       | 0.80  | 0.32   | 0.67  | -0.48    |   |                       |   |         |   |        |   |
| HILICpos_192.9983_6.25 | HILIC | pos        | 6.25            | 192.9983   |            |      | 4        |         | 0.91362                                 | 0.96817 | -0.02  | 0.10  | 0.53   | 0.63  | -0.06                 | -0.48 | 0.03177 | 0.36926 | 0.44  | -0.07 | 0.72                       | 0.68  | 0.40   | 0.01  | -0.64    |   |                       |   |         |   |        |   |
| HILICneg_193.0135_1.94 | HILIC | neg        | 1.94            | 193.0135   |            |      | 4        |         | 0.51232                                 | 0.78377 | 0.13   | 0.13  | 0.59   | 0.33  | 0.19                  | -0.38 | 0.45433 | 0.88375 | 0.65  | 0.88  | 0.95                       | 0.60  | 1.06   | 0.31  | 0.30     |   |                       |   |         |   |        |   |
| HILICneg_193.0358_7.12 | HILIC | neg        | 7.12            | 193.0358   |            |      | 4        |         | 0.99801                                 | 0.99918 | 0.19   | 0.54  | 0.45   | 0.28  | 0.46                  | -0.36 | 0.00009 | 0.01107 | 0.76  | 0.18  | 1.08                       | 0.76  | 0.56   | 0.75  | 0.31     |   |                       |   |         |   |        |   |
| RPneg_193.06223_2.802  | RP    | neg        | 2.802           | 193.0622   |            |      | 4        |         | 0.19000                                 | 0.53612 | 0.41   | 0.48  | 0.62   | 0.45  | 0.68                  | -0.13 | 0.15522 | 0.66160 | 0.95  | 1.01  | 0.82                       | 0.75  | 0.87   | 0.93  | 0.42     |   |                       |   |         |   |        |   |
| RPneg_193.08727_7.569  | RP    | neg        | 7.569           | 193.0873   |            |      | 4        |         | 0.07731                                 | 0.39850 | -0.63  | 0.19  | 0.15   | 0.59  | -0.88                 | 0.08  | 0.77965 | 0.96563 | -0.07 | -0.09 | -1.05                      | 0.05  | -0.37  | 0.41  | 0.33     |   |                       |   |         |   |        |   |
| RPneg_193.09032_7.073  | RP    | neg        | 7.073           | 193.0903   |            |      | 4        |         | 0.57258                                 | 0.81549 | -0.08  | 0.19  | 0.43   | 0.33  | 0.12                  | -0.25 | 0.34293 | 0.82748 | -0.18 | -0.32 | -0.15                      | -0.33 | -0.12  | -0.15 | 0.18     |   |                       |   |         |   |        |   |
| HILICpos_193.0970_0.93 | HILIC | pos        | 0.93            | 193.0970   |            |      | 4        |         | 0.41817                                 | 0.72193 | 0.11   | 0.14  | 0.13   | 0.06  | 0.12                  | 0.44  | 0.29622 | 0.79902 | -0.22 | -0.21 | -0.21                      | -0.26 | -0.21  | -0.22 | -0.28    |   |                       |   |         |   |        |   |
| HILICpos_193.0973_0.66 | HILIC | pos        | 0.66            | 193.0973   |            |      | 4        |         | 0.42143                                 | 0.72417 | 0.08   | 0.07  | 0.12   | 0.09  | 0.11                  | 0.33  | 0.69974 | 0.95160 | -0.19 | -0.18 | -0.14                      | -0.21 | -0.16  | -0.22 | -0.27    |   |                       |   |         |   |        |   |
| HILICpos_193.0974_0.74 | HILIC | pos        | 0.74            | 193.0974   |            |      | 4        |         | 0.20834                                 | 0.55127 | 0.21   | 0.25  | 0.21   | 0.15  | 0.24                  | 0.70  | 0.06797 | 0.50154 | -0.33 | -0.41 | -0.36                      | -0.35 | -0.30  | -0.34 | -0.41    |   |                       |   |         |   |        |   |
| RPpos_193.0975_5.2     | RP    | pos        | 5.2             | 193.0975   |            |      | 4        |         | 0.92823                                 | 0.97436 | 0.00   | -0.08 | 0.18   | 0.06  | -0.04                 | 0.39  | 0.17020 | 0.68250 | 0.14  | 0.07  | 0.06                       | 0.12  | 0.19   | 0.29  | 0.19     |   |                       |   |         |   |        |   |
| HILICpos_193.1434_0.47 | HILIC | pos        | 0.47            | 193.1434   |            |      | 4        |         | 0.31924                                 | 0.64568 | 1.10   | 2.77  | 2.99   | 3.22  | 3.02                  | 6.30  | 0.35226 | 0.83205 | 20.21 | 8.51  | 13.02                      | 17.22 | 14.40  | 22.80 | 24.11    |   |                       |   |         |   |        |   |
| RPpos_193.1584_10.97   | RP    | pos        | 10.97           | 193.1584   |            |      | 4        |         | 0.30336                                 | 0.63255 | -0.43  | -0.18 | -0.07  | 0.12  | 0.37                  | -0.48 | 0.66276 | 0.94285 | 0.21  | 1.47  | -0.32                      | 0.39  | 0.01   | 0.19  | 0.56     |   |                       |   |         |   |        |   |
| RPpos_193.1584_11.05   | RP    | pos        | 11.05           | 193.1584   |            |      | 4        |         | 0.16906                                 | 0.51386 | 0.53   | -0.13 | -0.09  | -0.16 | -0.48                 | -0.48 | 0.51473 | 0.90650 | 0.31  | 1.44  | -0.29                      | 0.66  | 0.00   | 0.25  | 0.74     |   |                       |   |         |   |        |   |
| HILICneg_193.7619_0.52 | HILIC | neg        | 0.52            | 193.7619   |            |      | 4        |         | 0.56694                                 | 0.81262 | 0.03   | 0.07  | 0.15   | 0.19  | 0.12                  | 0.26  | 0.83317 | 0.97501 | -0.14 | -0.19 | -0.18                      | -0.12 | -0.21  | -0.02 | -0.14    |   |                       |   |         |   |        |   |
| RPneg_193.81503_3.728  | RP    | neg        | 3.728           | 193.8150   |            |      | 4        |         | 0.68191                                 | 0.86803 | 0.13   | 0.01  | 0.09   | 0.13  | 0.16                  | 0.46  | 0.18741 | 0.70226 | -0.52 | -0.39 | -0.42                      | -0.32 | -0.64  | -0.57 | -0.55    |   |                       |   |         |   |        |   |
| HILICneg_193.8156_1.05 | HILIC | neg        | 1.05            | 193.8156   |            |      | 4        |         | 0.01790                                 | 0.24464 | 0.43   | -0.16 | 0.87   | 0.52  | 0.87                  | 0.16  | 0.00627 | 0.16696 | 0.56  | -0.30 | 0.71                       | 0.83  | 0.43   | 0.25  | -0.05    |   |                       |   |         |   |        |   |
| HILICneg_193.8159_0.93 | HILIC | neg        | 0.93            | 193.8159   |            |      | 4        |         | 4.77E-08                                | 0.00023 | -1.14  | -1.04 | -0.79  | -0.63 | -1.01                 | -0.59 | 0.70549 | 0.95242 | 0.11  | 0.27  | -0.17                      | 0.73  | 0.12   | -0.17 | -0.08    |   |                       |   |         |   |        |   |
| RPneg_193.8575_11.192  | RP    | neg        | 11.192          | 193.8575   |            |      | 4        |         | 0.00083                                 | 0.05766 | 1.76   | -0.02 | 1.24   | 1.65  | 2.23                  | 0.15  | 0.61794 | 0.93244 | -0.17 | -0.23 | -0.01                      | -0.28 | 0.30   | -0.19 | -0.11    |   |                       |   |         |   |        |   |
| RPneg_193.85751_13.94  | RP    | neg        | 13.94           | 193.8575   |            |      | 4        |         | 0.18811                                 | 0.53406 | -0.37  | -0.33 | -0.41  | 0.46  | -0.45                 | 0.05  | 0.83317 | 0.97501 | -0.18 | -0.22 | -0.24                      | -0.02 | -0.26  | 0.09  | 0.18     |   |                       |   |         |   |        |   |
| RPneg_193.85773_10.523 | RP    | neg        | 10.523          | 193.8577   |            |      | 4        |         | 0.35736                                 | 0.67656 | 0.11   | 0.19  | -0.13  | 0.18  | 0.63                  | 0.57  | 0.33839 | 0.82464 | -0.01 | 0.11  | -0.27                      | -0.02 | 0.00   | 0.11  | 0.02     |   |                       |   |         |   |        |   |
| HILICpos_194.0225_4.61 | HILIC | pos        | 4.61            | 194.0225   |            |      | 4        |         | 0.96268                                 | 0.98661 | 0.01   | 0.04  | 0.83   | 0.19  | -0.19                 | -0.59 | 0.00403 | 0.13232 | 0.57  | 0.48  | 0.71                       | 0.80  | 0.60   | 0.39  | -0.47    |   |                       |   |         |   |        |   |
| HILICneg_194.0267_4.21 | HILIC | neg        | 4.21            | 194.0267   |            |      | 4        |         | 0.20376                                 | 0.54825 | -0.15  | 0.28  | 0.40   | -0.10 | -0.23                 | -0.59 | 0.55722 | 0.91967 | -0.25 | -0.12 | -0.31                      | 0.07  | 0.25   | -0.35 | -0.66    |   |                       |   |         |   |        |   |
| RPneg_194.04564_2.093  | RP    | neg        | 2.093           | 194.0456   |            |      | 4        |         | 0.14796                                 | 0.49007 | -0.09  | -0.16 | 0.00   | 0.11  | -0.04                 | -0.44 | 0.03573 | 0.38629 | 0.39  | 0.36  | 0.18                       | 0.45  | 0.52   | 0.48  | 0.14     |   |                       |   |         |   |        |   |
| HILICneg_194.0458_1.82 | HILIC | neg        | 1.82            | 194.0458   |            |      | 4        |         | 0.34992                                 | 0.67022 | -0.11  | -0.04 | 0.05   | 0.01  | -0.05                 | -0.45 | 0.11087 | 0.59240 | 0.28  | 0.14  | 0.21                       | 0.33  | 0.38   | 0.35  | 0.02     |   |                       |   |         |   |        |   |
| RPneg_194.04581_6.132  | RP    | neg        | 6.132           | 194.0458   |            |      | 4        |         | 0.64374                                 | 0.84910 | -0.06  | -0.16 | -0.01  | -0.09 | 0.26                  | -0.25 | 0.16688 | 0.67836 | -0.17 | -0.07 | -0.26                      | -0.06 | -0.21  | -0.30 | -0.20    |   |                       |   |         |   |        |   |
| RPneg_194.04596_4.223  | RP    | neg        | 4.223           | 194.0460   |            |      | 4        |         | 0.55339                                 | 0.80553 | 0.08   | 0.09  | -0.24  | 0.49  | 0.35                  | -0.37 | 0.54169 | 0.91464 | -0.25 | -0.19 | -0.25                      | -0.22 | -0.14  | -0.23 | -0.36    |   |                       |   |         |   |        |   |
| RPneg_194.04602_2.687  | RP    | neg        | 2.687           | 194.0460   |            |      | 4        |         | 0.08505                                 | 0.41122 | 0.49   | 0.53  | 0.61   | 0.53  | 0.47                  | 0.32  | 0.29813 | 0.80013 | -0.30 | -0.33 | -0.31                      | -0.29 | -0.26  | -0.21 | -0.36    |   |                       |   |         |   |        |   |
| HILICneg_194.0461_0.85 | HILIC | neg        | 0.85            | 194.0461   |            |      | 4        |         | 0.49099                                 | 0.77181 | 0.22   | 0.11  | 0.28   | 0.56  | 0.39                  | -0.38 | 0.46090 | 0.88543 | -0.28 | -0.26 | -0.22                      | -0.27 | -0.23  | -0.22 | -0.38    |   |                       |   |         |   |        |   |
| RPneg_194.04628_2.45   | RP    | neg        | 2.45            | 194.0463   |            |      | 4        |         | 0.05066                                 | 0.34713 | 0.02   | 0.17  | 0.25   | 0.21  | -0.03                 | -0.42 | 0.39008 | 0.85129 | 0.17  | 0.01  | 0.07                       | 0.19  | 0.38   | 0.27  | -0.14    |   |                       |   |         |   |        |   |
| HILICpos_194.0593_7.36 | HILIC | pos        | 7.36            | 194.0593   |            |      | 4        |         | 0.18798                                 | 0.53402 | -0.43  | 0.49  | 0.09   | -0.33 | 0.17                  | 0.38  | 0.25827 | 0.77327 | 0.26  | 0.37  | 0.39                       | 0.07  | 0.19   | 0.04  | 0.23     |   |                       |   |         |   |        |   |
| HILICneg_194.1039_1.47 | HILIC | neg        | 1.47            | 194.1039   |            |      | 4        |         | 0.34297                                 | 0.66459 | 0.06   | 0.13  | 0.57   | 0.27  | 0.14                  | -0.33 | 0.00004 | 0.00583 | 0.58  | 0.44  | 0.65                       | 0.86  | 0.45   | 0.34  | 0.14     |   |                       |   |         |   |        |   |
| RPpos_194.117_10.21    | RP    | pos        | 10.21           | 194.1170   |            |      | 4        |         | 0.10109                                 | 0.43336 | -0.48  | -0.11 | -0.31  | 0.13  | -0.16                 | -0.32 | 0.92972 | 0.98975 | 0.00  | 0.43  | 0.01                       | 0.10  | 0.18   | -0.12 | -0.99    |   |                       |   |         |   |        |   |
| RPpos_194.1514_7.67    | RP    | pos        | 7.67            | 194.1514   |            |      | 4        |         | 0.10605                                 | 0.43931 | -0.24  | -0.20 | 0.30   | -0.25 | -0.15                 | -0.28 | 0.11337 | 0.59666 | -0.51 | -0.16 | -0.23                      | -0.70 | -0.05  | -0.59 | 0.20     |   |                       |   |         |   |        |   |
| RPpos_194.7836_9.82    | RP    | pos        | 9.82            | 194.7836   |            |      | 4        |         | 0.39047                                 | 0.70156 | 0.34   | 0.63  | -0.30  | 0.54  | 0.66                  | 0.55  | 0.42234 | 0.86968 | 0.66  | 0.39  | 0.90                       | 0.23  | 0.28   | 0.13  | 0.86     |   |                       |   |         |   |        |   |
| HILICpos_194.8179_0.94 | HILIC | pos        | 0.94            | 194.8179   |            |      | 4        |         | 0.85731                                 | 0.94640 | 0.02   | 0.18  | 0.16   | 0.06  | 0.09                  | -0.25 | 0.20779 | 0.72383 | 0.21  | 0.17  | 0.41                       | 0.17  | 0.13   | 0.10  | 0.02     |   |                       |   |         |   |        |   |
| HILICneg_194.8559_0.93 | HILIC | neg        | 0.93            | 194.8559   |            |      | 4        |         | 0.03893                                 | 0.31780 | -0.44  | -0.27 | -0.24  | -0.26 | -0.30                 | -0.04 | 0.01273 | 0.24141 | -0.60 | -0.21 | -0.49                      | -0.63 | -0.71  | -0.35 | -0.27    |   |                       |   |         |   |        |   |
| RPneg_194.90575_11.099 | RP    | neg        | 11.099          | 194.9058   |            |      | 4        |         |                                         |         |        |       |        |       |                       |       |         |         |       |       |                            |       |        |       |          |   |                       |   |         |   |        |   |

| Feature_ID             | Mode  | Ionization | Average_Rt.min. | Average_Mz | Metabolite | MSMS | ID_Level | HMDB_ID | IV-Alcohol self-administration (IV-ASA) |         |       |       |       |                       |       |       |         |         | IV-Alcohol clamp (IV-AC)   |       |       |       |       |                       |       |   |   |   |
|------------------------|-------|------------|-----------------|------------|------------|------|----------|---------|-----------------------------------------|---------|-------|-------|-------|-----------------------|-------|-------|---------|---------|----------------------------|-------|-------|-------|-------|-----------------------|-------|---|---|---|
|                        |       |            |                 |            |            |      |          |         | Area Under the Curve (AUC)              |         |       |       |       | IV-Ghrelin or Placebo |       |       |         |         | Area Under the Curve (AUC) |       |       |       |       | IV-Ghrelin or Placebo |       |   |   |   |
|                        |       |            |                 |            |            |      |          |         | p                                       | q       | d     | d     | d     | d                     | d     | d     | d       | d       | p                          | q     | d     | d     | d     | d                     | d     | d | d | d |
| HILICneg_196.0288_3.44 | HILIC | neg        | 3.44            | 196.0288   |            |      | 4        |         | 0.34447                                 | 0.66595 | -0.13 | -0.24 | 0.26  | 0.06                  | -0.04 | 0.00  | 0.04572 | 0.42949 | -0.16                      | -0.15 | -0.33 | -0.06 | -0.03 | -0.25                 | 0.05  |   |   |   |
| HILICpos_196.0732_2.98 | HILIC | pos        | 2.98            | 196.0732   |            |      | 4        |         | 0.31333                                 | 0.64125 | -0.22 | -0.15 | -0.11 | -0.18                 | -0.16 | -0.22 | 0.60637 | 0.92920 | 0.04                       | 0.04  | 0.01  | -0.01 | 0.04  | 0.02                  | 0.06  |   |   |   |
| HILICneg_196.0732_5.74 | HILIC | neg        | 5.74            | 196.0732   |            |      | 4        |         | 0.85054                                 | 0.94373 | 0.05  | 0.11  | 0.18  | 0.28                  | 0.22  | -0.17 | 0.93262 | 0.98984 | -0.08                      | -0.35 | 0.06  | 0.06  | -0.07 | -0.01                 | -0.38 |   |   |   |
| HILICneg_196.0748_4.92 | HILIC | neg        | 4.92            | 196.0748   |            |      | 4        |         | 0.21635                                 | 0.55848 | -0.13 | -0.07 | 0.20  | 0.27                  | 0.00  | -0.73 | 0.35654 | 0.83402 | -0.13                      | -0.46 | 0.10  | -0.24 | 0.01  | -0.09                 | -0.27 |   |   |   |
| HILICpos_196.1077_4.19 | HILIC | pos        | 4.19            | 196.1077   |            |      | 4        |         | 0.31839                                 | 0.64531 | -0.27 | -0.14 | -0.17 | -0.36                 | -0.20 | -0.06 | 0.10869 | 0.58951 | -0.58                      | -0.46 | -0.60 | -0.60 | -0.40 | -0.56                 | -0.56 |   |   |   |
| RPpos_196.5133_5.19    | RP    | pos        | 5.19            | 196.5133   |            |      | 4        |         | 0.87733                                 | 0.95405 | 0.03  | 0.02  | 0.16  | 0.04                  | 0.04  | -0.14 | 0.54061 | 0.81466 | 0.07                       | 0.08  | 0.14  | 0.04  | 0.01  | -0.06                 | 0.24  |   |   |   |
| HILICpos_196.515_0.94  | HILIC | pos        | 0.94            | 196.5150   |            |      | 4        |         | 0.82695                                 | 0.93863 | 0.03  | 0.19  | 0.13  | 0.10                  | 0.24  | -0.15 | 0.15302 | 0.65844 | 0.18                       | 0.17  | 0.28  | 0.18  | 0.14  | 0.09                  | 0.12  |   |   |   |
| RPpos_196.6114_8.3     | RP    | pos        | 8.3             | 196.6114   |            |      | 4        |         | 0.81999                                 | 0.93151 | 0.07  | 0.22  | 0.27  | 0.19                  | 0.03  | -0.31 | 0.08943 | 0.55239 | 2.05                       | 1.80  | 1.98  | 1.94  | 2.06  | 1.93                  | 1.18  |   |   |   |
| HILICpos_196.6139_0.4  | HILIC | pos        | 0.4             | 196.6139   |            |      | 4        |         | 0.42519                                 | 0.72659 | 0.17  | 0.25  | 0.57  | 0.33                  | 0.00  | -0.36 | 0.08783 | 0.54715 | 2.42                       | 1.86  | 2.20  | 2.98  | 1.99  | 1.94                  | 1.11  |   |   |   |
| HILICneg_196.8011_1.45 | HILIC | neg        | 1.45            | 196.8011   |            |      | 4        |         | 0.08952                                 | 0.41794 | -0.37 | 0.01  | -0.15 | -0.22                 | -0.13 | 0.33  | 0.00023 | 0.02153 | -0.45                      | -0.26 | -0.58 | -0.56 | -0.32 | -0.44                 | -0.05 |   |   |   |
| HILICneg_196.8533_0.93 | HILIC | neg        | 0.93            | 196.8533   |            |      | 4        |         | 0.00479                                 | 0.13767 | -0.50 | -0.33 | -0.33 | -0.41                 | -0.33 | 0.00  | 0.01787 | 0.28577 | -0.56                      | -0.44 | -0.47 | -0.53 | -0.53 | -0.37                 | -0.30 |   |   |   |
| HILICneg_196.9235_7.73 | HILIC | neg        | 7.73            | 196.9235   |            |      | 4        |         | 0.57641                                 | 0.81658 | -0.19 | 0.20  | 0.15  | 0.03                  | 0.05  | -0.29 | 0.09516 | 0.56376 | -0.40                      | -0.23 | -0.34 | -0.21 | -0.52 | -0.50                 | -0.27 |   |   |   |
| HILICneg_197.0226_1.1  | HILIC | neg        | 1.1             | 197.0226   |            |      | 4        |         | 0.74973                                 | 0.90015 | -0.07 | 0.03  | -0.12 | -0.05                 | 0.02  | 0.61  | 0.69488 | 0.95033 | -0.10                      | -0.05 | -0.08 | -0.26 | 0.06  | -0.10                 | 0.66  |   |   |   |
| HILICneg_197.0318_4.91 | HILIC | neg        | 4.91            | 197.0318   |            |      | 4        |         | 0.46511                                 | 0.75413 | 0.23  | 0.59  | 0.72  | 0.25                  | 0.12  | 0.20  | 0.24757 | 0.76374 | -0.13                      | 0.10  | -0.34 | 0.27  | 0.19  | -0.61                 | -0.53 |   |   |   |
| HILICneg_197.0322_1.04 | HILIC | neg        | 1.04            | 197.0322   |            |      | 4        |         | 0.63363                                 | 0.84463 | -0.04 | 0.38  | 0.30  | -0.04                 | 0.23  | -0.05 | 0.10760 | 0.58623 | -0.31                      | 0.05  | -0.52 | -0.11 | 0.08  | -0.31                 | -0.60 |   |   |   |
| HILICpos_197.0403_7.35 | HILIC | pos        | 7.35            | 197.0403   |            |      | 4        |         | 0.02210                                 | 0.26505 | -0.85 | 0.00  | -0.17 | -1.74                 | -0.46 | -0.30 | 0.89078 | 0.98433 | -0.07                      | -0.87 | 0.62  | 0.06  | 0.52  | -0.83                 | -0.27 |   |   |   |
| RPneg_197.04324_3.524  | RP    | neg        | 3.524           | 197.0432   |            |      | 4        |         | 0.42708                                 | 0.72851 | 0.22  | 0.44  | 1.26  | 0.30                  | 0.47  | 0.07  | 0.09957 | 0.57123 | 0.41                       | -0.47 | 0.42  | 0.37  | 0.64  | 0.45                  | 0.10  |   |   |   |
| HILICneg_197.0436_0.88 | HILIC | neg        | 0.88            | 197.0436   |            |      | 4        |         | 0.46234                                 | 0.75264 | 0.18  | 0.59  | 1.56  | 0.62                  | 0.25  | -0.11 | 0.04205 | 0.41487 | 0.52                       | 0.10  | 0.26  | 0.62  | 0.89  | 0.53                  | 0.01  |   |   |   |
| RPneg_197.0582_1.631   | RP    | neg        | 1.631           | 197.0582   |            |      | 4        |         | 0.27558                                 | 0.61083 | 0.34  | 0.20  | 0.64  | 0.58                  | 0.54  | 0.28  | 0.21946 | 0.73609 | 0.83                       | -0.63 | 0.88  | 0.19  | -0.30 | 0.84                  | 0.61  |   |   |   |
| HILICneg_197.0685_1.74 | HILIC | neg        | 1.74            | 197.0685   |            |      | 4        |         | 0.70236                                 | 0.87845 | 0.07  | -0.02 | 0.03  | 0.05                  | 0.02  | -0.39 | 0.55477 | 0.91871 | -0.18                      | -0.17 | -0.22 | 0.22  | 0.18  | -0.19                 | -0.19 |   |   |   |
| RPneg_197.0822_5.378   | RP    | neg        | 5.378           | 197.0822   |            |      | 4        |         | 0.94460                                 | 0.97957 | 0.11  | 0.10  | 0.19  | 0.28                  | 0.76  | -0.13 | 0.13711 | 0.63581 | 0.35                       | 0.25  | 0.14  | 0.39  | 0.32  | 0.15                  | 0.95  |   |   |   |
| HILICneg_197.0824_0.54 | HILIC | neg        | 0.54            | 197.0824   |            |      | 4        |         | 0.10870                                 | 0.44211 | 0.43  | 0.16  | 0.39  | 0.39                  | 1.12  | 0.11  | 0.81581 | 0.97203 | 0.01                       | -0.13 | -0.38 | 0.24  | 0.00  | 0.02                  | 1.14  |   |   |   |
| HILICpos_197.0895_5.82 | HILIC | pos        | 5.82            | 197.0895   |            |      | 4        |         | 0.13152                                 | 0.46869 | 0.28  | 0.29  | 0.88  | 0.46                  | 0.17  | -0.60 | 0.00002 | 0.00383 | 0.72                       | 0.47  | 0.71  | 0.85  | 0.82  | 0.59                  | 0.28  |   |   |   |
| HILICpos_197.1008_6.95 | HILIC | pos        | 6.95            | 197.1008   |            |      | 4        |         | 0.46088                                 | 0.75153 | -0.20 | 0.10  | 0.27  | 0.01                  | 0.01  | -0.47 | 0.11209 | 0.59487 | 0.16                       | 0.26  | 0.33  | 0.56  | 0.00  | -0.03                 | -0.10 |   |   |   |
| HILICpos_197.1033_6.5  | HILIC | pos        | 6.5             | 197.1033   |            |      | 4        |         | 0.57550                                 | 0.81613 | -0.06 | -0.03 | 0.14  | 0.03                  | 0.11  | -0.10 | 0.54462 | 0.91563 | 0.15                       | -0.39 | 0.00  | 0.37  | 0.41  | -0.20                 | 0.38  |   |   |   |
| HILICpos_197.1034_4.18 | HILIC | pos        | 4.18            | 197.1034   |            |      | 4        |         | 0.44315                                 | 0.73918 | -0.20 | 0.08  | -0.23 | -0.27                 | -0.14 | 0.10  | 0.05654 | 0.49511 | -0.59                      | -0.30 | -0.37 | -0.66 | -0.67 | -0.56                 | -0.59 |   |   |   |
| RPpos_197.1176_4.97    | RP    | pos        | 4.97            | 197.1176   |            |      | 4        |         | 0.56594                                 | 0.81213 | 0.06  | 0.24  | 0.60  | 0.33                  | 0.25  | -0.04 | 0.00984 | 0.21135 | 0.54                       | 0.16  | 0.93  | 0.40  | 1.02  | 0.53                  | -0.11 |   |   |   |
| RPpos_197.1283_3.61    | RP    | pos        | 3.61            | 197.1283   |            |      | 4        |         | 0.80290                                 | 0.92400 | 0.10  | -0.04 | 0.09  | 0.35                  | 0.51  | -0.27 | 0.07898 | 0.52788 | 0.34                       | 0.40  | 0.45  | 0.14  | 0.39  | 0.76                  | -0.06 |   |   |   |
| HILICpos_197.1643_0.44 | HILIC | pos        | 0.44            | 197.1643   |            |      | 4        |         | 0.35776                                 | 0.67677 | -0.10 | -0.15 | -0.08 | -0.10                 | -0.05 | 0.10  | 0.29040 | 0.79495 | -0.22                      | -0.18 | -0.18 | -0.24 | -0.18 | -0.18                 | -0.35 |   |   |   |
| RPneg_197.80766_3.731  | RP    | neg        | 3.731           | 197.8077   |            |      | 4        |         | 0.10496                                 | 0.43808 | 0.42  | 0.37  | 0.49  | 0.37                  | 0.42  | 0.77  | 0.13710 | 0.63581 | -0.60                      | -0.72 | -0.57 | -0.52 | -0.56 | -0.54                 | -0.45 |   |   |   |
| RPneg_197.80786_7.429  | RP    | neg        | 7.429           | 197.8079   |            |      | 4        |         | 0.90195                                 | 0.96375 | 0.06  | 0.04  | 0.21  | 0.23                  | 0.32  | 0.15  | 0.05412 | 0.46086 | 0.05                       | 0.04  | 0.05  | -0.02 | 0.08  | 0.19                  | -0.09 |   |   |   |
| HILICneg_197.808_0.93  | HILIC | neg        | 0.93            | 197.8080   |            |      | 4        |         | 0.26610                                 | 0.30002 | -0.99 | -0.88 | -1.01 | -0.75                 | -0.81 | -0.81 | 0.15157 | 0.65718 | 0.25                       | 0.45  | 0.17  | 0.69  | 0.27  | -0.14                 | 0.30  |   |   |   |
| HILICneg_197.8081_1.48 | HILIC | neg        | 1.48            | 197.8081   |            |      | 4        |         | 0.06651                                 | 0.37877 | -0.35 | -0.40 | -0.12 | -0.36                 | 0.14  | -0.42 | 0.12805 | 0.62005 | -0.28                      | -0.63 | 0.49  | 0.19  | -0.30 | -0.34                 | -0.22 |   |   |   |
| RPneg_197.80812_8.17   | RP    | neg        | 8.17            | 197.8081   |            |      | 4        |         | 0.10116                                 | 0.43354 | -0.10 | -0.09 | 0.31  | 0.20                  | 0.01  | 0.30  | 0.37436 | 0.84348 | 0.14                       | 0.08  | 0.09  | 0.16  | 0.39  | 0.06                  | 0.17  |   |   |   |
| RPneg_197.8082_10.092  | RP    | neg        | 10.092          | 197.8082   |            |      | 4        |         | 0.36944                                 | 0.68581 | -0.36 | -0.29 | -0.15 | 0.37                  | 0.06  | 0.07  | 0.78207 | 0.96597 | 0.01                       | 0.04  | 0.21  | 0.30  | -0.27 | 0.12                  | -0.02 |   |   |   |
| RPneg_197.8082_9.174   | RP    | neg        | 9.174           | 197.8082   |            |      | 4        |         | 0.01096                                 | 0.20290 | 0.72  | 0.09  | 1.26  | 0.71                  | 0.91  | 1.31  | 0.00233 | 0.09499 | 0.28                       | -0.34 | 0.60  | 0.73  | 0.06  | 0.23                  | -0.36 |   |   |   |
| HILICneg_197.8083_1.04 | HILIC | neg        | 1.04            | 197.8083   |            |      | 4        |         | 0.09618                                 | 0.42597 | 0.35  | -0.01 | 0.41  | 0.80                  | 0.65  | -0.05 | 0.01725 | 0.28062 | 0.38                       | -0.41 | 0.37  | 0.74  | 0.31  | 0.41                  | -0.31 |   |   |   |
| RPneg_197.80844_2.635  | RP    | neg        | 2.635           | 197.8084   |            |      | 4        |         | 0.05064                                 | 0.34713 | 0.47  | 0.54  | 0.94  | 0.42                  | 0.56  | 1.32  | 0.87066 | 0.98076 | -0.04                      | -0.40 | -0.03 | 0.08  | 0.48  | -0.64                 | 0.30  |   |   |   |
| HILICneg_197.8085_1.43 | HILIC | neg        | 1.43            | 197.8085   |            |      | 4        |         | 0.01546                                 | 0.23287 | -0.69 | -0.12 | -0.06 | -0.42                 | -0.29 | 0.18  | 0.01187 | 0.23206 | 0.73                       | 0.84  | 0.13  | 1.27  | 0.03  | 0.51                  | 1.14  |   |   |   |
| HILICneg_197.8876_0.52 | HILIC | neg        | 0.52            | 197.8876   |            |      | 4        |         | 0.08340                                 | 0.40888 | -0.06 | -0.02 | -0.03 | 0.17                  | 0.02  | 0.09  | 0.41435 | 0.86469 | -0.10                      | -0.03 | -0.13 | -0.18 | 0.07  | -0.16                 | -0.10 |   |   |   |
| RPneg_197.91003_7.566  | RP    | neg        | 7.566           | 197.9100   |            |      | 4        |         | 0.07463                                 | 0.39316 | 0.52  | 0.41  | 0.90  | 0.64                  | 0.49  | -0.05 | 0.63509 | 0.93557 | 0.16                       | 0.01  | 0.09  | 0.41  | 0.23  | 0.25                  | -0.18 |   |   |   |
| HILICneg_197.9631_1.41 | HILIC | neg        | 1.41            | 197.9631   |            |      | 4        |         | 0.04324                                 | 0.33121 | -0.46 | -0.14 | -0.26 | -0.09                 | -0.10 | 0.85  | 0.32599 | 0.81865 | 0.21                       | 0.08  | -0.01 | 0.69  | 0.03  | 0.13                  | 0.33  |   |   |   |
| HILICneg_197.9638_6.24 | HILIC | neg        | 6.24            | 197.9638   |            |      | 4        |         | 0.00066                                 | 0.05016 | -0.77 | -0.33 | -0.51 | -0.25                 | -0.47 | 0.24  | 0.97748 | 0.99726 | -0.01                      | 0.22  | -0.05 | -0.06 | -0.29 | 0.26                  | 0.36  |   |   |   |
| HILICneg_197.9638_2.96 | HILIC | neg        | 2.96            | 197.9638   |            |      | 4        |         | 0.25005                                 | 0.58900 | -0.37 | 0.52  | -0.15 | -0.25                 | -0.23 | 0.33  | 0.10044 | 0.57210 | 0.49                       | 0.24  | 0.50  | 0.70  | -0.20 | 0.44                  | 0.71  |   |   |   |
| HILICneg_197.9871_0.44 | HILIC | neg        | 0.44            | 197.9871   |            |      | 4        |         | 0.20873                                 | 0.55165 | -0.18 | -0.12 | -0.15 | -0.14                 | -0.17 | -0.01 | 0.32683 | 0.81908 | 0.48                       | 0.36  | 0.50  | 0.48  | 0.77  | 0.42                  | 0.23  |   |   |   |
| HILICneg_198.0497_5.62 | HILIC | neg        | 5.62            | 198.0497   |            |      | 4        |         | 0.17808                                 | 0.52379 | -0.29 | -0.07 | 0.05  | -0.20                 | -0.30 | -0.18 | 0.02121 | 0.30778 | -0.11                      | 0.02  | -0.02 | 0.21  | -0.14 | -0.25                 | -0.55 |   |   |   |
| HILICpos_198.0525_0.49 | HILIC | pos        | 0.49            | 198.0525   |            |      | 4        |         | 0.58585                                 | 0.82164 | -0.21 | 0.12  | -0.12 | 0.10                  | -0.12 | -0.24 | 0.91917 | 0.98860 | -0.07                      | 0.15  | -0.25 | -0.32 | 0.27  | -0.06                 | 0.31  |   |   |   |
| RPpos_198.0526_5.2     | RP    | pos        | 5.2             | 198.0526   |            |      | 4        |         | 0.85688                                 | 0.94640 | 0.02  | -0.05 | 0.10  | 0.06                  | 0.02  | 0.62  | 0.23147 | 0.74813 | 0.11                       | 0.07  | 0.06  | 0.08  | 0.20  | 0.19                  | 0.16  |   |   |   |
| HILICpos_198.0528_4.55 | HILIC | pos        | 4.55            | 198.0528   |            |      | 4        |         | 0.85982                                 | 0.94755 | -0.06 | 0.08  | 0.09  | -0.01                 | -0.07 | -0.44 | 0.88486 | 0.98281 | -0.03                      | -0.04 | -0.02 | 0.02  | 0.00  | -0.04                 | -0.13 |   |   |   |
| RPneg_198.07091_6      |       |            |                 |            |            |      |          |         |                                         |         |       |       |       |                       |       |       |         |         |                            |       |       |       |       |                       |       |   |   |   |

| Feature_ID             | Mode  | Ionization | Average_Rt.min. | Average_Mz | Metabolite | MSMS | ID_Level | HMDB_ID   | IV-Alcohol self-administration (IV-ASA) |       |       |        |       |       |                       |         |         |          |       |       |                            | IV-Alcohol clamp (IV-AC) |       |                       |       |   |                       |   |   |        |   |   |                       |   |   |
|------------------------|-------|------------|-----------------|------------|------------|------|----------|-----------|-----------------------------------------|-------|-------|--------|-------|-------|-----------------------|---------|---------|----------|-------|-------|----------------------------|--------------------------|-------|-----------------------|-------|---|-----------------------|---|---|--------|---|---|-----------------------|---|---|
|                        |       |            |                 |            |            |      |          |           | Area Under the Curve (AUC)              |       |       |        |       |       | IV-Ghrelin or Placebo |         |         |          |       |       | Area Under the Curve (AUC) |                          |       |                       |       |   | IV-Ghrelin or Placebo |   |   |        |   |   |                       |   |   |
|                        |       |            |                 |            |            |      |          |           | Baseline                                |       |       | IV-ASA |       |       | IV-Ghrelin or Placebo |         |         | Baseline |       |       | IV-ASA                     |                          |       | IV-Ghrelin or Placebo |       |   | Baseline              |   |   | IV-ASA |   |   | IV-Ghrelin or Placebo |   |   |
|                        |       |            |                 |            |            |      |          |           | p                                       | q     | d     | d      | d     | d     | d                     | d       | d       | p        | q     | d     | d                          | d                        | d     | d                     | d     | d | p                     | q | d | d      | d | d | d                     | d | d |
| RPneg_199.80515_7.429  | RP    | neg        | 7.429           | 199.80515  |            | 4    |          | 0.79612   | 0.92106                                 | 0.04  | -0.03 | 0.17   | 0.21  | 0.34  | 0.16                  | 0.03125 | 0.36739 | 0.09     | 0.09  | -0.04 | 0.05                       | 0.34                     | 0.10  | 0.10                  | -0.02 |   |                       |   |   |        |   |   |                       |   |   |
| HILICneg_199.8052_1.04 | HILIC | neg        | 1.04            | 199.8052   |            | 4    |          | 0.00809   | 0.17726                                 | 0.57  | 0.20  | 0.75   | 0.70  | 0.87  | 0.02                  | 0.10454 | 0.58038 | 0.31     | -0.32 | 0.62  | 0.44                       | 0.26                     | 0.22  | 0.22                  | -0.41 |   |                       |   |   |        |   |   |                       |   |   |
| RPneg_199.80548_2.635  | RP    | neg        | 2.635           | 199.8055   |            | 4    |          | 0.30796   | 0.63658                                 | 0.30  | 0.09  | 0.60   | 0.32  | 0.37  | 1.53                  | 0.67434 | 0.94679 | -0.06    | -0.13 | -0.25 | -0.13                      | -0.23                    | 0.26  | 0.49                  |       |   |                       |   |   |        |   |   |                       |   |   |
| HILICneg_199.8056_0.41 | HILIC | neg        | 0.41            | 199.8056   |            | 4    |          | 0.12543   | 0.46128                                 | -0.34 | 0.20  | 0.11   | -0.42 | -0.59 | -0.14                 | 0.42583 | 0.87093 | 0.19     | 0.93  | 0.06  | 0.37                       | -0.23                    | 0.19  | 0.13                  |       |   |                       |   |   |        |   |   |                       |   |   |
| HILICneg_199.8057_2.11 | HILIC | neg        | 2.11            | 199.8057   |            | 4    |          | 0.09147   | 0.42705                                 | -0.35 | 0.03  | 0.05   | -0.54 | -0.06 | -0.17                 | 0.49370 | 0.89889 | 0.32     | 0.20  | -0.21 | 0.45                       | 0.70                     | -0.17 | -0.16                 |       |   |                       |   |   |        |   |   |                       |   |   |
| RPpos_199.8213_11.09   | RP    | pos        | 11.09           | 199.8213   |            | 4    |          | 0.65223   | 0.84007                                 | 0.17  | 0.11  | 0.61   | 0.35  | 0.11  | -0.47                 | 0.92464 | 0.89890 | 0.10     | 0.96  | 0.12  | 0.31                       | 0.47                     | 0.52  | 0.20                  |       |   |                       |   |   |        |   |   |                       |   |   |
| RPneg_199.85117_10.656 | RP    | neg        | 10.656          | 199.8512   |            | 4    |          | 0.36058   | 0.67900                                 | 0.23  | -0.11 | 0.04   | 0.57  | 0.66  | 0.48                  | 0.30806 | 0.80733 | 0.15     | 0.15  | 0.57  | 0.11                       | -0.44                    | -0.09 | 0.67                  |       |   |                       |   |   |        |   |   |                       |   |   |
| RPneg_199.85127_10.849 | RP    | neg        | 10.849          | 199.8513   |            | 4    |          | 0.86345   | 0.94900                                 | 0.05  | -0.21 | 0.42   | 0.31  | 0.42  | -0.01                 | 0.78478 | 0.96662 | 0.06     | -0.21 | 0.25  | 0.48                       | -0.28                    | 0.15  | 0.09                  |       |   |                       |   |   |        |   |   |                       |   |   |
| RPneg_199.85132_10.524 | RP    | neg        | 10.524          | 199.8513   |            | 4    |          | 0.92059   | 0.97114                                 | -0.04 | 0.15  | 0.03   | 0.33  | 0.12  | 0.25                  | 0.28695 | 0.79369 | 0.10     | 0.10  | 0.08  | 0.19                       | -0.03                    | 0.12  | 0.23                  |       |   |                       |   |   |        |   |   |                       |   |   |
| HILICneg_199.8816_0.52 | HILIC | neg        | 0.52            | 199.8816   |            | 4    |          | 0.14460   | 0.48515                                 | -0.06 | 0.03  | 0.06   | 0.07  | 0.04  | 0.02                  | 0.48811 | 0.89812 | -0.11    | -0.13 | -0.10 | -0.05                      | -0.11                    | -0.11 | -0.18                 |       |   |                       |   |   |        |   |   |                       |   |   |
| RPneg_199.93594_14.169 | RP    | neg        | 14.169          | 199.9359   |            | 4    |          | 0.97049   | 0.98877                                 | -0.06 | 0.12  | 0.03   | 0.47  | -0.20 | 0.34                  | 0.95200 | 0.99379 | -0.10    | -0.60 | -0.03 | -0.10                      | 0.55                     | -0.15 | -0.08                 |       |   |                       |   |   |        |   |   |                       |   |   |
| HILICneg_199.9784_0.96 | HILIC | neg        | 0.96            | 199.9784   |            | 4    |          | 0.96019   | 0.98597                                 | 0.12  | 0.30  | 0.28   | 0.23  | 0.32  | -0.10                 | 0.12063 | 0.60798 | 0.40     | 0.34  | 0.39  | 0.41                       | 0.45                     | 0.44  | 0.17                  |       |   |                       |   |   |        |   |   |                       |   |   |
| HILICpos_199.9878_0.94 | HILIC | pos        | 0.94            | 199.9878   |            | 4    |          | 0.69751   | 0.87621                                 | 0.05  | 0.05  | 0.21   | 0.28  | 0.35  | -0.33                 | 0.00438 | 0.13733 | -0.41    | -0.52 | -0.46 | -0.38                      | -0.33                    | -0.37 | -0.53                 |       |   |                       |   |   |        |   |   |                       |   |   |
| HILICneg_199.9972_2.8  | HILIC | neg        | 2.8             | 199.9972   |            | 4    |          | 0.15653   | 0.49953                                 | -0.13 | 0.55  | -0.01  | -0.02 | 0.01  | -0.64                 | 0.18463 | 0.70014 | 0.52     | 0.37  | 0.47  | 0.79                       | 0.75                     | 0.45  | -0.07                 |       |   |                       |   |   |        |   |   |                       |   |   |
| HILICpos_200.0543_1.38 | HILIC | pos        | 1.38            | 200.0543   |            | 4    |          | 0.35049   | 0.67073                                 | -0.27 | -0.01 | 0.31   | -0.43 | -0.16 | 0.64                  | 0.50106 | 0.90223 | 0.41     | -0.04 | 0.00  | 0.78                       | 0.56                     | 1.37  | -0.31                 |       |   |                       |   |   |        |   |   |                       |   |   |
| RPneg_200.07217_6.747  | RP    | neg        | 6.747           | 200.0722   |            | 4    |          | 0.62339   | 0.84022                                 | -0.23 | -0.26 | -0.12  | -0.18 | -0.18 | -0.37                 | 0.04246 | 0.41671 | 0.74     | 0.24  | 0.50  | 1.05                       | 0.88                     | 1.07  | 0.69                  |       |   |                       |   |   |        |   |   |                       |   |   |
| HILICpos_200.1026_6.37 | HILIC | pos        | 6.37            | 200.1026   |            | 4    |          | 0.05922   | 0.36500                                 | -0.41 | 0.00  | -0.21  | -0.19 | -0.14 | -0.80                 | 0.98134 | 0.99752 | -0.06    | 0.31  | 0.10  | 0.19                       | -0.42                    | -0.25 | -0.08                 |       |   |                       |   |   |        |   |   |                       |   |   |
| HILICpos_200.1275_3.46 | HILIC | pos        | 3.46            | 200.1275   |            | 4    |          | 0.58778   | 0.82288                                 | 0.02  | 0.07  | 0.26   | 0.16  | 0.15  | 0.33                  | 0.28612 | 0.79334 | -0.21    | 0.11  | -0.21 | -0.41                      | 0.08                     | -0.33 | -0.49                 |       |   |                       |   |   |        |   |   |                       |   |   |
| HILICpos_200.1281_3.17 | HILIC | pos        | 3.17            | 200.1281   |            | 4    |          | 0.67222   | 0.86359                                 | -0.10 | -0.02 | 0.26   | 0.22  | -0.09 | -0.22                 | 0.46373 | 0.88698 | -0.17    | -0.22 | 0.10  | 0.10                       | 0.07                     | -0.26 | -0.58                 |       |   |                       |   |   |        |   |   |                       |   |   |
| HILICpos_200.1282_2.9  | HILIC | pos        | 2.9             | 200.1282   |            | 4    |          | 0.23019   | 0.57168                                 | 0.13  | 0.21  | 0.27   | 0.09  | 0.08  | -0.38                 | 0.46460 | 0.88725 | -0.05    | -0.02 | 0.07  | 0.01                       | 0.00                     | -0.07 | -0.20                 |       |   |                       |   |   |        |   |   |                       |   |   |
| HILICneg_200.1293_0.6  | HILIC | neg        | 0.6             | 200.1293   |            | 4    |          | 0.55582   | 0.80724                                 | -0.09 | 0.05  | 0.06   | 0.10  | -0.05 | -0.43                 | 0.89467 | 0.98465 | 0.00     | -0.11 | -0.06 | -0.07                      | 0.16                     | 0.08  | -0.15                 |       |   |                       |   |   |        |   |   |                       |   |   |
| RPneg_200.1293_7.014   | RP    | neg        | 7.014           | 200.1293   |            | 4    |          | 0.08149   | 0.40618                                 | 0.85  | 0.01  | 1.11   | 1.07  | 1.07  | -0.25                 | 0.15715 | 0.66504 | 0.79     | 1.11  | 1.60  | 0.69                       | -0.22                    | 0.78  | 0.15                  |       |   |                       |   |   |        |   |   |                       |   |   |
| RPneg_200.12935_6.845  | RP    | neg        | 6.845           | 200.1294   |            | 4    |          | 0.52682   | 0.79164                                 | -0.08 | 0.08  | 0.04   | 0.08  | -0.02 | -0.37                 | 0.84931 | 0.97746 | 0.01     | -0.09 | -0.07 | -0.06                      | 0.11                     | 0.11  | -0.03                 |       |   |                       |   |   |        |   |   |                       |   |   |
| RPneg_200.12955_4.9    | RP    | neg        | 4.9             | 200.1296   |            | 4    |          | 0.44412   | 0.74015                                 | 0.24  | 0.38  | 0.26   | 0.50  | 0.41  | -0.06                 | 0.81123 | 0.97162 | 0.10     | 0.14  | 0.17  | 0.22                       | 0.11                     | 0.19  | 0.10                  |       |   |                       |   |   |        |   |   |                       |   |   |
| HILICpos_200.1643_0.41 | HILIC | pos        | 0.41            | 200.1643   |            | 4    |          | 0.06213   | 0.36921                                 | -0.49 | -0.21 | -0.19  | -0.07 | -0.72 | -0.21                 | 0.75246 | 0.96206 | -0.22    | -0.05 | -0.56 | -0.26                      | -0.30                    | 0.30  | 0.25                  |       |   |                       |   |   |        |   |   |                       |   |   |
| RPpos_200.1643_4.16    | RP    | pos        | 4.16            | 200.1643   |            | 4    |          | 0.79223   | 0.91905                                 | -0.06 | 0.03  | 0.15   | -0.10 | -0.04 | 0.34                  | 0.08135 | 0.53387 | -0.27    | -0.29 | -0.23 | -0.29                      | -0.15                    | -0.34 | -0.25                 |       |   |                       |   |   |        |   |   |                       |   |   |
| RPpos_200.1646_3.91    | RP    | pos        | 3.91            | 200.1646   |            | 4    |          | 0.41591   | 0.72017                                 | 0.01  | 0.11  | 0.09   | -0.02 | 0.06  | 0.59                  | 0.03736 | 0.39394 | -0.23    | -0.17 | -0.23 | -0.34                      | -0.12                    | -0.19 | -0.30                 |       |   |                       |   |   |        |   |   |                       |   |   |
| RPpos_200.1646_6.42    | RP    | pos        | 6.42            | 200.1646   |            | 4    |          | 0.04033   | 0.32140                                 | -0.62 | -0.13 | -0.31  | -0.08 | -0.05 | -0.69                 | 0.32711 | 0.81909 | 0.20     | 0.65  | -0.01 | 0.47                       | 0.02                     | 0.45  | -0.13                 |       |   |                       |   |   |        |   |   |                       |   |   |
| RPpos_200.1647_10.61   | RP    | pos        | 10.61           | 200.1647   |            | 4    |          | 0.05013   | 0.34658                                 | -0.46 | -0.24 | -0.23  | -0.22 | -0.25 | -0.50                 | 0.32557 | 0.81845 | 0.41     | 1.34  | -0.01 | 0.72                       | 0.01                     | 0.19  | 0.56                  |       |   |                       |   |   |        |   |   |                       |   |   |
| RPpos_200.1647_10.7    | RP    | pos        | 10.7            | 200.1647   |            | 4    |          | 0.00913   | 0.18757                                 | -0.67 | -0.21 | -0.26  | -0.47 | -0.44 | -0.53                 | 0.30663 | 0.80651 | 0.47     | 1.40  | -0.04 | 0.86                       | -0.03                    | 0.39  | 0.45                  |       |   |                       |   |   |        |   |   |                       |   |   |
| HILICneg_200.1972_1.45 | HILIC | neg        | 1.45            | 200.1972   |            | 4    |          | 0.23076   | 0.57226                                 | -0.32 | 0.22  | -0.14  | -0.21 | 0.03  | 0.53                  | 0.00010 | 0.01244 | -0.39    | -0.25 | -0.40 | -0.55                      | -0.38                    | -0.15 | -0.34                 |       |   |                       |   |   |        |   |   |                       |   |   |
| RPneg_200.8569_10.4    | RP    | neg        | 10.4            | 200.8567   |            | 4    |          | 0.80488   | 0.92493                                 | -0.14 | 0.14  | 0.08   | -0.35 | 0.67  | 0.29                  | 0.64193 | 0.93677 | 0.07     | -0.16 | 0.29  | 0.78                       | -0.62                    | -0.30 | 0.31                  |       |   |                       |   |   |        |   |   |                       |   |   |
| RPneg_200.85912_10.205 | RP    | neg        | 10.205          | 200.8591   |            | 4    |          | 0.23046   | 0.57197                                 | -0.28 | -0.11 | 0.14   | -0.13 | 0.20  | 0.31                  | 0.14544 | 0.64876 | 0.16     | -0.05 | -0.18 | 0.39                       | 0.07                     | 0.43  | -0.58                 |       |   |                       |   |   |        |   |   |                       |   |   |
| RPneg_200.85916_10.85  | RP    | neg        | 10.85           | 200.8592   |            | 4    |          | 0.83822   | 0.93922                                 | 0.07  | -0.06 | 0.20   | 0.11  | 0.55  | 0.25                  | 0.95680 | 0.99457 | -0.07    | 0.07  | 0.02  | 0.32                       | -1.10                    | -0.03 | 0.16                  |       |   |                       |   |   |        |   |   |                       |   |   |
| RPneg_200.85927_10.525 | RP    | neg        | 10.525          | 200.8593   |            | 4    |          | 0.54945   | 0.80347                                 | 0.10  | 0.19  | 0.16   | 0.48  | 0.36  | 0.47                  | 0.21898 | 0.73554 | 0.17     | 0.14  | 0.22  | 0.21                       | 0.11                     | 0.12  | 0.26                  |       |   |                       |   |   |        |   |   |                       |   |   |
| HILICneg_200.974_5.85  | HILIC | neg        | 5.85            | 200.9740   |            | 4    |          | 0.88275   | 0.95651                                 | 0.10  | 0.21  | 0.80   | 0.31  | 0.04  | -0.57                 | 0.04949 | 0.44302 | 0.73     | 0.97  | 0.81  | 0.66                       | 0.75                     | 0.68  | -0.42                 |       |   |                       |   |   |        |   |   |                       |   |   |
| HILICpos_200.9828_0.94 | HILIC | pos        | 0.94            | 200.9828   |            | 4    |          | 0.71863   | 0.88531                                 | 0.05  | 0.03  | 0.25   | 0.22  | 0.27  | -0.25                 | 0.00636 | 0.16827 | -0.43    | -0.52 | -0.44 | -0.44                      | -0.34                    | -0.43 | -0.57                 |       |   |                       |   |   |        |   |   |                       |   |   |
| RPneg_201.0029_4.487   | RP    | neg        | 4.487           | 201.0029   |            | 4    |          | 0.51842   | 0.78719                                 | -0.28 | -0.28 | -0.27  | -0.32 | -0.25 | -0.09                 | 0.36417 | 0.83784 | -0.33    | -0.34 | -0.31 | -0.33                      | -0.31                    | -0.28 | -0.41                 |       |   |                       |   |   |        |   |   |                       |   |   |
| HILICneg_201.0227_0.46 | HILIC | neg        | 0.46            | 201.0227   |            | 4    |          | 0.42959   | 0.73017                                 | -0.21 | -0.19 | -0.17  | -0.20 | -0.14 | -0.23                 | 0.70288 | 0.95222 | -0.17    | -0.19 | -0.13 | -0.15                      | -0.18                    | -0.14 | -0.28                 |       |   |                       |   |   |        |   |   |                       |   |   |
| RPneg_201.0228_4.733   | RP    | neg        | 4.733           | 201.0228   |            | 4    |          | 0.73868   | 0.89454                                 | -0.02 | -0.04 | -0.03  | -0.06 | 0.05  | 0.38                  | 0.03567 | 0.38605 | -0.42    | -0.40 | -0.38 | -0.42                      | -0.40                    | -0.42 | -0.36                 |       |   |                       |   |   |        |   |   |                       |   |   |
| RPneg_201.0229_4.958   | RP    | neg        | 4.958           | 201.0229   |            | 4    |          | 0.49379   | 0.77316                                 | -0.19 | -0.17 | -0.15  | -0.16 | -0.14 | -0.27                 | 0.89268 | 0.98433 | -0.09    | -0.11 | -0.07 | -0.10                      | -0.08                    | -0.08 | -0.13                 |       |   |                       |   |   |        |   |   |                       |   |   |
| RPneg_201.02342_4.834  | RP    | neg        | 4.834           | 201.0234   |            | 4    |          | 0.93127   | 0.97542                                 | 0.02  | -0.03 | 0.06   | 0.02  | 0.10  | 0.39                  | 0.04658 | 0.43198 | -0.37    | -0.36 | -0.32 | -0.36                      | -0.33                    | -0.35 | -0.39                 |       |   |                       |   |   |        |   |   |                       |   |   |
| HILICneg_201.035_2.33  | HILIC | neg        | 2.33            | 201.0350   |            | 4    |          | 0.55307   | 0.80544                                 | 0.02  | 0.15  | 0.24   | 0.23  | 0.24  | 0.04                  | 0.69670 | 0.95088 | -0.05    | -0.03 | -0.03 | -0.07                      | -0.03                    | -0.03 | -0.07                 |       |   |                       |   |   |        |   |   |                       |   |   |
| HILICneg_201.0538_2.68 | HILIC | neg        | 2.68            | 201.0538   |            | 4    |          | 0.47316</ |                                         |       |       |        |       |       |                       |         |         |          |       |       |                            |                          |       |                       |       |   |                       |   |   |        |   |   |                       |   |   |



| Feature_ID             | Mode  | Ionization | Average_Rt.min. | Average_Mz                    | Metabolite | MSMS | ID_Level | HMDB_ID | IV-Alcohol self-administration (IV-ASA) |         |       |       |       |                       |       |       |         |         | IV-Alcohol clamp (IV-AC)   |       |       |       |       |                       |       |   |   |   |
|------------------------|-------|------------|-----------------|-------------------------------|------------|------|----------|---------|-----------------------------------------|---------|-------|-------|-------|-----------------------|-------|-------|---------|---------|----------------------------|-------|-------|-------|-------|-----------------------|-------|---|---|---|
|                        |       |            |                 |                               |            |      |          |         | Area Under the Curve (AUC)              |         |       |       |       | IV-Ghrelin or Placebo |       |       |         |         | Area Under the Curve (AUC) |       |       |       |       | IV-Ghrelin or Placebo |       |   |   |   |
|                        |       |            |                 |                               |            |      |          |         | p                                       | q       | d     | d     | d     | d                     | d     | d     | d       | d       | p                          | q     | d     | d     | d     | d                     | d     | d | d | d |
| HILICpos_202.1188_4.22 | HILIC | pos        | 4.22            | 202.1188                      |            |      | 4        |         | 0.55212                                 | 0.80497 | 0.03  | -0.01 | 0.14  | 0.13                  | 0.17  | -0.30 | 0.85407 | 0.97825 | -0.04                      | -0.20 | 0.00  | 0.08  | -0.17 | 0.11                  | -0.22 |   |   |   |
| RPpos_202.144_6.85     | RP    | pos        | 6.85            | 202.1440                      |            |      | 4        |         | 0.66118                                 | 0.85799 | -0.07 | 0.03  | 0.04  | 0.18                  | -0.01 | -0.34 | 0.82967 | 0.97454 | 0.00                       | -0.11 | -0.10 | -0.04 | 0.15  | 0.05                  | -0.01 |   |   |   |
| HILICpos_202.1543_3.4  | HILIC | pos        | 3.4             | 202.1543                      |            |      | 4        |         | 0.45126                                 | 0.74468 | -0.02 | 0.15  | 0.35  | -0.08                 | 0.04  | -0.20 | 0.19541 | 0.70995 | -0.12                      | 0.25  | -0.25 | -0.12 | -0.05 | -0.40                 | -0.01 |   |   |   |
| HILICpos_202.1797_0.83 | HILIC | pos        | 0.83            | 202.1797                      |            |      | 4        |         | 0.17026                                 | 0.51516 | -0.39 | -0.19 | -0.15 | -0.09                 | -0.36 | -0.04 | 0.50906 | 0.90412 | 0.00                       | -0.10 | 0.11  | -0.35 | 0.43  | -0.08                 | -0.04 |   |   |   |
| HILICpos_202.1802_1.31 | HILIC | pos        | 1.31            | 202.1802                      |            |      | 4        |         | 0.16239                                 | 0.50690 | 0.23  | 0.20  | -0.07 | 0.45                  | 0.72  | 0.21  | 0.16239 | 0.50690 | 0.09                       | -0.05 | 0.31  | -0.65 | 0.05  | 0.10                  | 0.28  |   |   |   |
| HILICneg_202.8826_1.45 | HILIC | neg        | 1.45            | 202.8826                      |            |      | 4        |         | 0.10282                                 | 0.43831 | -0.77 | -0.05 | -0.33 | 0.01                  | -0.20 | 0.28  | 0.00721 | 0.71911 | -0.46                      | -0.02 | -0.65 | -0.37 | -0.56 | 0.19                  |       |   |   |   |
| RPneg_202.96478_1.595  | RP    | neg        | 1.595           | 202.9648                      |            |      | 4        |         | 0.79013                                 | 0.91806 | 0.05  | -0.02 | 0.15  | 0.11                  | 0.47  | -0.09 | 0.19141 | 0.70680 | 0.42                       | 0.28  | 0.18  | 0.29  | 0.39  | 0.31                  | 1.16  |   |   |   |
| RPneg_202.96481_1.054  | RP    | neg        | 1.054           | 202.9648                      |            |      | 4        |         | 0.93172                                 | 0.97557 | 0.01  | -0.21 | 0.23  | 0.10                  | 0.36  | -0.01 | 0.13348 | 0.63061 | 0.60                       | 0.08  | 0.49  | 0.47  | 0.38  | 0.55                  | 1.12  |   |   |   |
| RPneg_202.96535_1.36   | RP    | neg        | 1.36            | 202.9654                      |            |      | 4        |         | 0.25060                                 | 0.58973 | 0.30  | 0.00  | 0.08  | 0.30                  | 1.13  | 0.09  | 0.55268 | 0.91818 | 0.68                       | 0.15  | 0.51  | 1.71  | 0.15  | -0.01                 | 0.44  |   |   |   |
| HILICneg_202.989_0.87  | HILIC | neg        | 0.87            | 202.9890                      |            |      | 4        |         | 0.31544                                 | 0.64283 | -0.35 | -0.05 | 0.31  | 0.30                  | -0.27 | -0.90 | 0.51138 | 0.90555 | -0.15                      | -0.34 | -0.48 | -0.31 | 0.29  | 0.44                  | -0.01 |   |   |   |
| HILICneg_202.9978_4.89 | HILIC | neg        | 4.89            | 202.9978                      |            |      | 4        |         | 0.87974                                 | 0.95509 | 0.03  | 0.61  | 0.39  | -0.06                 | 0.02  | 0.37  | 0.03147 | 0.36858 | -0.40                      | -0.07 | -0.71 | -0.02 | -0.03 | -0.76                 | -0.65 |   |   |   |
| RPneg_203.00194_3.21   | RP    | neg        | 3.21            | 203.0019                      |            |      | 4        |         | 0.14991                                 | 0.49235 | 0.64  | 0.46  | 0.63  | 1.05                  | 0.23  | 0.87  | 0.62136 | 0.93338 | -0.15                      | -0.23 | -0.18 | -0.19 | -0.06 | -0.19                 | -0.19 |   |   |   |
| HILICneg_203.002_0.51  | HILIC | neg        | 0.51            | 203.0020                      |            |      | 4        |         | 0.17826                                 | 0.52406 | 0.40  | 0.33  | 0.08  | 0.59                  | 0.19  | 0.93  | 0.63676 | 0.93602 | 0.47                       | -0.42 | 0.56  | 0.37  | 0.58  | 0.40                  | 0.44  |   |   |   |
| RPneg_203.00209_3.66   | RP    | neg        | 3.66            | 203.0021                      |            |      | 4        |         | 0.69962                                 | 0.87726 | 0.13  | 0.06  | 0.35  | 0.39                  | 0.26  | -0.01 | 0.88641 | 0.98315 | 0.08                       | 0.15  | 0.17  | 0.09  | -0.07 | 0.19                  | 0.01  |   |   |   |
| HILICneg_203.0021_0.43 | HILIC | neg        | 0.43            | 203.0021                      |            |      | 4        |         | 0.09610                                 | 0.42597 | 0.86  | 0.84  | 1.00  | 1.22                  | 1.16  | 0.15  | 0.22500 | 0.74163 | -0.49                      | -0.22 | -0.51 | -0.45 | -0.49 | -0.36                 | -0.23 |   |   |   |
| RPneg_203.00211_2.941  | RP    | neg        | 2.941           | 203.0021                      |            |      | 4        |         | 0.25966                                 | 0.59779 | 0.29  | 0.20  | 0.36  | 0.24                  | 0.73  | 0.60  | 0.96094 | 0.99553 | -0.04                      | -0.22 | -0.13 | 0.05  | -0.09 | -0.10                 | 0.13  |   |   |   |
| RPneg_203.00218_2.831  | RP    | neg        | 2.831           | 203.0022                      |            |      | 4        |         | 0.63334                                 | 0.84451 | 0.08  | 0.03  | 0.30  | 0.30                  | 0.29  | 0.21  | 0.00854 | 0.19780 | 1.50                       | -0.98 | -0.99 | -1.18 | -0.83 | -1.08                 | -0.74 |   |   |   |
| RPneg_203.00224_3.548  | RP    | neg        | 3.548           | 203.0022                      |            |      | 4        |         | 0.72886                                 | 0.88960 | 0.08  | 0.11  | 0.26  | 0.21                  | 0.24  | -0.06 | 0.73407 | 0.95858 | 0.02                       | 0.04  | 0.09  | -0.01 | 0.07  | 0.01                  | -0.02 |   |   |   |
| RPneg_203.00243_3.221  | RP    | neg        | 3.221           | 203.0024                      |            |      | 4        |         | 0.03910                                 | 0.31836 | 1.14  | 1.09  | 1.31  | 1.07                  | 1.25  | 1.28  | 0.14120 | 0.64314 | -0.37                      | -0.31 | 0.31  | -0.35 | -0.44 | -0.35                 | -0.43 |   |   |   |
| HILICneg_203.0062_7.36 | HILIC | neg        | 7.36            | 203.0062                      |            |      | 4        |         | 0.16707                                 | 0.51243 | -0.48 | -0.16 | -0.44 | -0.93                 | -0.13 | -0.40 | 0.67447 | 0.94679 | 0.23                       | 0.28  | 0.77  | 0.38  | -0.23 | 0.17                  | 0.18  |   |   |   |
| RPneg_203.01875_4.959  | RP    | neg        | 4.959           | 203.0188                      |            |      | 4        |         | 0.49126                                 | 0.77187 | -0.19 | -0.17 | -0.15 | -0.17                 | -0.14 | -0.28 | 0.92969 | 0.98975 | -0.07                      | -0.10 | -0.06 | -0.06 | -0.06 | -0.05                 | -0.14 |   |   |   |
| HILICneg_203.0194_1.42 | HILIC | neg        | 1.42            | 203.0194                      |            |      | 4        |         | 0.45552                                 | 0.74767 | -0.24 | -0.09 | 0.38  | -0.38                 | -0.15 | 1.40  | 0.58137 | 0.92438 | 0.33                       | -0.01 | 0.11  | 0.98  | 0.25  | 0.75                  | -0.40 |   |   |   |
| HILICneg_203.0209_6.17 | HILIC | neg        | 6.17            | 203.0209                      |            |      | 4        |         | 0.31790                                 | 0.64494 | -0.33 | 0.22  | 0.23  | -0.23                 | -0.04 | -0.15 | 0.00222 | 0.09238 | 0.28                       | 0.30  | 0.56  | 0.51  | 0.32  | 0.39                  | -0.04 |   |   |   |
| HILICneg_203.0288_5.85 | HILIC | neg        | 5.85            | 203.0288                      |            |      | 4        |         | 0.98607                                 | 0.99480 | 0.07  | 0.57  | 0.79  | 0.24                  | 0.07  | -0.62 | 0.03168 | 0.36926 | 1.20                       | 0.99  | 1.30  | 1.33  | 0.97  | 0.67                  | 0.12  |   |   |   |
| HILICneg_203.0509_1.97 | HILIC | neg        | 1.97            | 203.0509                      |            |      | 4        |         | 0.89039                                 | 0.95991 | 0.15  | 0.20  | 0.25  | 0.27                  | 0.22  | -0.17 | 0.24116 | 0.75800 | 0.11                       | 0.17  | 0.15  | 0.09  | 0.19  | 0.05                  | -0.03 |   |   |   |
| HILICneg_203.051_2.68  | HILIC | neg        | 2.68            | 203.0510                      |            |      | 4        |         | 0.48225                                 | 0.76583 | -0.21 | -0.31 | -0.25 | -0.26                 | -0.09 | -0.23 | 0.32708 | 0.81909 | -0.24                      | 0.11  | -0.11 | 2.02  | -0.20 | -0.36                 | -0.13 |   |   |   |
| HILICneg_203.0737_1.1  | HILIC | neg        | 1.1             | 203.0737                      |            |      | 4        |         | 0.06927                                 | 0.38250 | 0.41  | -0.01 | 0.35  | 0.46                  | 1.02  | -0.36 | 0.03201 | 0.37005 | 1.19                       | 0.52  | 1.70  | 1.06  | 1.14  | 0.65                  | 0.58  |   |   |   |
| RPpos_203.0809_5.27    | RP    | pos        | 5.27            | 203.0809                      |            |      | 4        |         | 0.31195                                 | 0.64002 | -0.32 | -0.18 | -0.05 | -0.10                 | -0.17 | -0.37 | 0.66133 | 0.94270 | -0.08                      | -0.01 | -0.08 | 0.02  | 0.13  | -0.31                 | -0.37 |   |   |   |
| RPneg_203.08318_2.389  | RP    | neg        | 2.389           | 203.0832 isomer of tryptophan |            |      | 4        |         | 0.11575                                 | 0.45158 | -0.27 | 0.22  | 0.64  | -0.11                 | -0.71 | -0.65 | 0.85145 | 0.97755 | 0.00                       | -0.09 | 0.19  | 0.19  | 0.16  | -0.21                 | -0.42 |   |   |   |
| RPpos_203.0916_6.42    | RP    | pos        | 6.42            | 203.0916                      |            |      | 4        |         | 0.04178                                 | 0.32620 | -0.73 | 0.28  | -0.47 | -0.28                 | -0.45 | -0.56 | 0.72753 | 0.95609 | -0.10                      | 0.20  | 0.06  | -0.27 | 0.21  | -0.70                 | -0.03 |   |   |   |
| RPneg_203.09264_4.084  | RP    | neg        | 4.084           | 203.0926                      |            |      | 4        |         | 0.13495                                 | 0.47413 | -0.53 | -0.16 | 0.05  | 0.37                  | -0.50 | 0.73  | 0.39940 | 0.95827 | 0.17                       | -0.26 | -0.10 | 0.10  | -0.13 | 0.68                  | -0.25 |   |   |   |
| RPneg_203.09308_5.759  | RP    | neg        | 5.759           | 203.0931                      |            |      | 4        |         | 0.59540                                 | 0.81182 | -0.13 | 0.52  | 0.32  | -0.07                 | 0.41  | -0.22 | 0.41963 | 0.86745 | -0.43                      | -0.16 | -0.12 | 0.38  | -0.02 | 0.92                  | 0.32  |   |   |   |
| HILICpos_203.1026_6.13 | HILIC | pos        | 6.13            | 203.1026                      |            |      | 4        |         | 0.09759                                 | 0.42765 | -0.44 | 0.49  | 0.99  | 0.67                  | 0.20  | -0.12 | 0.14120 | 0.64314 | -0.37                      | -0.31 | 0.31  | -0.35 | -0.44 | -0.35                 | -0.43 |   |   |   |
| RPpos_203.128_7.19     | RP    | pos        | 7.19            | 203.1280                      |            |      | 4        |         | 0.15317                                 | 0.49619 | -0.43 | 0.20  | -0.41 | 0.26                  | 0.20  | 0.33  | 0.38846 | 0.85113 | 0.13                       | -0.41 | 0.18  | 0.48  | 0.56  | 0.14                  | 0.64  |   |   |   |
| RPneg_203.12904_6.06   | RP    | neg        | 6.06            | 203.1290                      |            |      | 4        |         | 0.25751                                 | 0.59561 | 0.24  | 0.14  | 2.01  | 0.30                  | 0.08  | 0.31  | 0.00050 | 0.03695 | 1.54                       | 0.41  | 2.09  | 2.49  | 1.19  | 0.59                  | 0.04  |   |   |   |
| RPneg_203.12904_5.608  | RP    | neg        | 5.608           | 203.1290                      |            |      | 4        |         | 0.67619                                 | 0.86544 | 0.09  | 0.18  | 0.45  | 0.15                  | 0.15  | -0.26 | 0.35885 | 0.83442 | 0.20                       | -0.80 | -0.12 | 0.51  | 0.46  | -0.11                 | 1.10  |   |   |   |
| RPneg_203.12923_5.842  | RP    | neg        | 5.842           | 203.1292                      |            |      | 4        |         | 0.08542                                 | 0.41134 | 0.49  | 0.13  | 1.89  | 1.06                  | 0.20  | -0.29 | 0.00000 | 0.00045 | 1.31                       | 1.13  | 0.87  | 1.90  | 1.43  | 0.73                  | 0.37  |   |   |   |
| HILICpos_203.1386_5.56 | HILIC | pos        | 5.56            | 203.1386                      |            |      | 4        |         | 0.44170                                 | 0.73844 | 0.35  | 0.55  | 0.45  | 0.56                  | 0.60  | -0.33 | 0.15447 | 0.66058 | 0.12                       | 0.03  | 0.14  | 0.25  | 0.14  | 0.05                  | 0.11  |   |   |   |
| HILICpos_203.1391_5.27 | HILIC | pos        | 5.27            | 203.1391                      |            |      | 4        |         | 0.37628                                 | 0.69131 | -0.14 | -0.03 | 0.41  | -0.20                 | 0.15  | 0.13  | 0.74104 | 0.95996 | -0.18                      | -0.93 | -0.16 | 0.07  | 0.30  | -0.23                 | -0.35 |   |   |   |
| HILICpos_203.1391_4.62 | HILIC | pos        | 4.62            | 203.1391                      |            |      | 4        |         | 0.20197                                 | 0.54691 | -0.19 | 0.00  | 0.15  | -0.22                 | -0.20 | 0.16  | 0.68833 | 0.94962 | -0.01                      | -0.16 | 0.03  | 0.33  | -0.04 | 0.17                  | -0.38 |   |   |   |
| HILICpos_203.1504_6.46 | HILIC | pos        | 6.46            | 203.1504                      |            |      | 4        |         | 0.25821                                 | 0.59624 | -0.24 | 0.01  | 0.27  | -0.14                 | -0.13 | -0.56 | 0.16589 | 0.67711 | -0.06                      | 0.07  | 0.17  | 0.31  | -0.17 | -0.44                 | -0.24 |   |   |   |
| RPpos_203.1644_8.95    | RP    | pos        | 8.95            | 203.1644                      |            |      | 4        |         | 0.94594                                 | 0.98020 | -0.01 | -0.06 | -0.23 | 0.12                  | 1.12  | -0.18 | 0.82916 | 0.97442 | 0.03                       | 0.13  | 0.11  | 0.30  | -0.07 | 0.02                  | -0.34 |   |   |   |
| HILICpos_203.1753_2.69 | HILIC | pos        | 2.69            | 203.1753                      |            |      | 4        |         | 0.15667                                 | 0.49965 | -0.19 | -0.03 | 0.13  | -0.30                 | -0.13 | 0.09  | 0.08308 | 0.53705 | 0.04                       | 0.19  | 0.13  | 0.02  | 0.08  | -0.06                 | -0.23 |   |   |   |
| HILICpos_203.7513_4.4  | HILIC | pos        | 4.4             | 203.7513                      |            |      | 4        |         | 0.52066                                 | 0.78801 | -0.07 | 0.22  | 0.16  | 0.36                  | -0.09 | -0.41 | 0.35463 | 0.83325 | 0.47                       | 0.41  | 0.51  | 0.08  | 0.61  | 0.37                  | 0.35  |   |   |   |
| HIL                    |       |            |                 |                               |            |      |          |         |                                         |         |       |       |       |                       |       |       |         |         |                            |       |       |       |       |                       |       |   |   |   |



| Feature_ID             | Mode | Ionization | Average_Rt.min. | Average_Mz | Metabolite           | MSMS                                                                                  | ID_Level | HMDB_ID | IV-Alcohol self-administration (IV-ASA) |         |        |       |        |       |                       |       |          |         |       |       | IV-Alcohol clamp (IV-AC)   |       |        |       |          |   |                       |   |         |   |        |   |
|------------------------|------|------------|-----------------|------------|----------------------|---------------------------------------------------------------------------------------|----------|---------|-----------------------------------------|---------|--------|-------|--------|-------|-----------------------|-------|----------|---------|-------|-------|----------------------------|-------|--------|-------|----------|---|-----------------------|---|---------|---|--------|---|
|                        |      |            |                 |            |                      |                                                                                       |          |         | Area Under the Curve (AUC)              |         |        |       |        |       | IV-Ghrelin or Placebo |       |          |         |       |       | Area Under the Curve (AUC) |       |        |       |          |   | IV-Ghrelin or Placebo |   |         |   |        |   |
|                        |      |            |                 |            |                      |                                                                                       |          |         | Baseline                                |         | IV-ASA |       | BrAC=0 |       | Baseline              |       | Post-LD  |         | IV-AC |       | Post-AC                    |       | BrAC=0 |       | Baseline |   | IV-AC                 |   | Post-AC |   | BrAC=0 |   |
|                        |      |            |                 |            |                      |                                                                                       |          |         | p                                       | q       | d      | d     | d      | d     | p                     | q     | d        | d       | d     | d     | p                          | q     | d      | d     | d        | d | p                     | q | d       | d | d      | d |
| RPneg_204.98161_1.849  | neg  | RP         | 1.849           | 204.9816   |                      |                                                                                       | 4        |         | 0.49153                                 | 0.77215 | 0.21   | 0.28  | 0.98   | 0.35  | -0.01                 | 0.07  | 0.10318  | 0.57817 | 0.85  | 0.86  | 2.01                       | 2.31  | 1.62   | 1.28  | -0.22    |   |                       |   |         |   |        |   |
| HILICneg_204.9945_4.89 | neg  | HILIC      | 4.89            | 204.9945   |                      |                                                                                       | 4        |         | 0.72267                                 | 0.88677 | 0.10   | 0.57  | 0.50   | -0.08 | 0.22                  | 0.23  | 0.04074  | 0.41070 | -0.40 | 0.04  | -0.62                      | -0.19 | 0.09   | -0.80 | -0.70    |   |                       |   |         |   |        |   |
| RPneg_204.99759_3.547  | neg  | RP         | 3.547           | 204.9976   |                      |                                                                                       | 4        |         | 0.63177                                 | 0.84409 | 0.06   | 0.08  | 0.26   | 0.19  | 0.19                  | -0.08 | 0.75827  | 0.96233 | 0.03  | 0.02  | 0.07                       | -0.07 | 0.12   | -0.05 | 0.02     |   |                       |   |         |   |        |   |
| RPneg_205.05093_5.833  | neg  | RP         | 5.833           | 205.0509   |                      |                                                                                       | 4        |         | 0.63559                                 | 0.84568 | -0.06  | -0.03 | -0.03  | 0.03  | 0.03                  | -0.16 | 0.13581  | 0.63417 | -0.12 | -0.17 | -0.13                      | -0.11 | -0.12  | -0.13 | -0.11    |   |                       |   |         |   |        |   |
| HILICpos_205.068_4.87  | pos  | HILIC      | 4.87            | 205.0680   |                      |                                                                                       | 4        |         | 0.59884                                 | 0.82792 | -0.13  | -0.06 | 0.03   | -0.13 | -0.17                 | -0.68 | 0.39863  | 0.59953 | -0.07 | -0.12 | 0.02                       | -0.02 | -0.11  | -0.06 | -0.39    |   |                       |   |         |   |        |   |
| HILICpos_205.0819_7    | pos  | HILIC      | 7               | 205.0819   |                      |                                                                                       | 4        |         | 0.79560                                 | 0.92627 | 0.21   | 0.21  | 0.20   | 0.00  | -0.10                 | 0.00  | 0.80039  | 0.69955 | 0.03  | 0.14  | 0.03                       | 0.18  | 0.05   | 0.03  | -0.49    |   |                       |   |         |   |        |   |
| HILICpos_205.0971_0.46 | pos  | HILIC      | 0.46            | 205.0971   |                      |                                                                                       | 4        |         | 0.11245                                 | 0.44817 | 0.56   | 0.58  | 0.88   | 0.37  | 0.81                  | -0.23 | 0.20780  | 0.72383 | 0.77  | 0.67  | 0.89                       | 1.05  | 0.85   | 0.57  | 0.17     |   |                       |   |         |   |        |   |
| RPpos_205.0975_2.4     | pos  | RP         | 2.4             | 205.0975   | isomer of tryptophan | 188.0703 (100), 146.0603 (50), 144.0813 (5), 159.0907 (5), 118.0648 (5), 132.0810 (5) | 4        |         | 0.08641                                 | 0.41251 | -0.27  | 0.12  | 0.59   | -0.02 | -0.71                 | -0.54 | 0.94454  | 0.99197 | -0.06 | -0.10 | 0.06                       | 0.15  | 0.11   | -0.24 | -0.42    |   |                       |   |         |   |        |   |
| HILICpos_205.1297_0.81 | pos  | HILIC      | 0.81            | 205.1297   |                      |                                                                                       | 4        |         | 0.94988                                 | 0.98128 | -0.04  | 0.06  | -0.09  | -0.12 | 0.22                  | -0.09 | 0.68045  | 0.94764 | 0.12  | -0.03 | -0.33                      | 0.29  | 0.09   | 0.25  | 0.72     |   |                       |   |         |   |        |   |
| HILICpos_205.1434_0.43 | pos  | HILIC      | 0.43            | 205.1434   |                      |                                                                                       | 4        |         | 0.91644                                 | 0.96957 | -0.01  | 0.41  | 0.39   | 0.11  | 0.13                  | -0.23 | 0.58178  | 0.92438 | -0.22 | -0.30 | 0.08                       | -0.38 | -0.07  | -0.44 | 0.96     |   |                       |   |         |   |        |   |
| HILICpos_205.1545_6.95 | pos  | HILIC      | 6.95            | 205.1545   |                      |                                                                                       | 4        |         | 0.51071                                 | 0.78280 | 0.14   | 0.12  | 0.34   | -0.04 | 0.23                  | -0.15 | 0.84749  | 0.97724 | 0.01  | 0.05  | 0.12                       | 0.31  | -0.13  | -0.08 | -0.36    |   |                       |   |         |   |        |   |
| RPneg_205.36208_11.189 | neg  | RP         | 11.189          | 205.3621   |                      |                                                                                       | 4        |         | 0.04266                                 | 0.32926 | 3.46   | 0.55  | 0.80   | 2.74  | 5.20                  | 0.03  | 0.26876  | 0.78099 | -0.35 | -0.12 | 0.12                       | -0.31 | -0.39  | -0.43 | 0.03     |   |                       |   |         |   |        |   |
| RPneg_205.83992_13.927 | neg  | RP         | 13.927          | 205.8399   |                      |                                                                                       | 4        |         | 0.09191                                 | 0.42064 | -0.45  | -0.56 | -0.38  | 0.40  | -0.48                 | 0.00  | 0.36883  | 0.84009 | 0.20  | -0.19 | 0.39                       | 0.00  | -0.42  | 0.46  | 0.37     |   |                       |   |         |   |        |   |
| HILICneg_205.8401_0.39 | neg  | HILIC      | 0.39            | 205.8401   |                      |                                                                                       | 4        |         | 0.09998                                 | 0.43115 | -0.60  | -0.26 | -0.09  | 0.05  | -0.25                 | -0.55 | 0.46889  | 0.88943 | 0.27  | 1.26  | -0.26                      | 0.30  | -0.16  | 0.21  | 0.83     |   |                       |   |         |   |        |   |
| HILICneg_205.901_1.45  | neg  | HILIC      | 1.45            | 205.9010   |                      |                                                                                       | 4        |         | 0.89898                                 | 0.96311 | -0.05  | 0.03  | 0.04   | -0.03 | 0.10                  | 0.32  | 0.04329  | 0.41904 | -0.34 | -0.37 | -0.39                      | -0.42 | -0.26  | -0.32 | -0.11    |   |                       |   |         |   |        |   |
| HILICneg_205.9417_0.45 | neg  | HILIC      | 0.45            | 205.9417   |                      |                                                                                       | 4        |         | 0.65543                                 | 0.85558 | -0.12  | -0.02 | -0.05  | -0.15 | 0.00                  | 0.00  | 0.72392  | 0.95590 | -0.03 | -0.03 | 0.06                       | -0.07 | -0.06  | -0.01 | -0.08    |   |                       |   |         |   |        |   |
| RPneg_205.94229_7.304  | neg  | RP         | 7.304           | 205.9423   |                      |                                                                                       | 4        |         | 0.44961                                 | 0.74351 | -0.15  | -0.07 | -0.07  | -0.18 | -0.02                 | -0.01 | 0.93712  | 0.95926 | -0.02 | 0.00  | 0.02                       | -0.05 | -0.04  | 0.00  | -0.03    |   |                       |   |         |   |        |   |
| HILICpos_205.9617_0.94 | pos  | HILIC      | 0.94            | 205.9617   |                      |                                                                                       | 4        |         | 0.89911                                 | 0.96136 | 0.00   | 0.13  | 0.20   | 0.24  | 0.30                  | -0.34 | 0.00524  | 0.15226 | -0.37 | -0.39 | -0.47                      | -0.31 | -0.21  | -0.43 | -0.59    |   |                       |   |         |   |        |   |
| HILICneg_206.0126_4.33 | neg  | HILIC      | 4.33            | 206.0126   |                      |                                                                                       | 4        |         | 0.54419                                 | 0.80043 | 0.06   | 0.00  | 0.29   | -0.35 | 0.13                  | -0.02 | 0.016549 | 0.77683 | 0.32  | 0.27  | 0.23                       | 0.46  | 0.70   | 0.07  | -0.07    |   |                       |   |         |   |        |   |
| RPneg_206.04584_4.038  | neg  | RP         | 4.038           | 206.0458   |                      |                                                                                       | 4        |         | 0.54363                                 | 0.80008 | -0.09  | 0.02  | 0.16   | -0.12 | -0.01                 | -0.17 | 0.90011  | 0.80208 | 0.36  | 0.78  | 0.39                       | 0.47  | 0.12   | 0.18  | -0.18    |   |                       |   |         |   |        |   |
| HILICpos_206.0809_5.1  | pos  | HILIC      | 5.1             | 206.0809   |                      |                                                                                       | 4        |         | 0.15736                                 | 0.50067 | 0.52   | 0.33  | 1.33   | 0.50  | 0.56                  | 0.21  | 0.05264  | 0.45570 | 0.91  | -0.34 | 1.08                       | 0.97  | 1.80   | 0.15  | 1.27     |   |                       |   |         |   |        |   |
| RPneg_206.08232_4.79   | neg  | RP         | 4.79            | 206.0823   |                      |                                                                                       | 4        |         | 0.94488                                 | 0.97975 | 0.12   | 0.48  | 0.57   | 0.37  | 0.17                  | -0.25 | 0.01463  | 0.25776 | 0.61  | 0.44  | 0.67                       | 0.62  | 0.84   | 0.60  | 0.09     |   |                       |   |         |   |        |   |
| HILICneg_206.0826_0.86 | neg  | HILIC      | 0.86            | 206.0826   |                      |                                                                                       | 4        |         | 0.80940                                 | 0.92702 | 0.16   | 0.47  | 0.80   | 0.30  | 0.16                  | -0.32 | 0.00355  | 0.12140 | 0.68  | 0.60  | 0.83                       | 0.75  | 1.11   | 0.44  | 0.01     |   |                       |   |         |   |        |   |
| HILICneg_206.1036_4.9  | neg  | HILIC      | 4.9             | 206.1036   |                      |                                                                                       | 4        |         | 0.30494                                 | 0.63406 | -0.12  | 0.11  | 0.13   | 0.08  | 0.04                  | -0.55 | 0.27185  | 0.78271 | -0.12 | -0.15 | 0.04                       | -0.05 | -0.10  | -0.15 | -0.26    |   |                       |   |         |   |        |   |
| HILICpos_206.1174_2.01 | pos  | HILIC      | 2.01            | 206.1174   |                      |                                                                                       | 4        |         | 0.25780                                 | 0.59603 | -0.14  | 0.02  | -0.07  | 0.12  | 0.02                  | -0.14 | 0.41287  | 0.86456 | -0.05 | -0.05 | -0.01                      | -0.11 | 0.01   | -0.04 | -0.11    |   |                       |   |         |   |        |   |
| HILICpos_206.1174_1.74 | pos  | HILIC      | 1.74            | 206.1174   |                      |                                                                                       | 4        |         | 0.09589                                 | 0.42596 | -0.11  | -0.01 | -0.03  | 0.40  | -0.05                 | -0.16 | 0.17465  | 0.68944 | -0.13 | -0.15 | -0.08                      | -0.13 | -0.18  | -0.11 | -0.16    |   |                       |   |         |   |        |   |
| HILICneg_206.7896_1.43 | neg  | HILIC      | 1.43            | 206.7896   |                      |                                                                                       | 4        |         | 0.01594                                 | 0.23382 | -0.48  | -0.20 | -0.42  | -0.19 | -0.16                 | -0.36 | 0.02691  | 0.34456 | 0.30  | 0.39  | 0.21                       | 0.54  | 0.06   | 0.42  | 0.48     |   |                       |   |         |   |        |   |
| RPneg_206.83771_11.098 | neg  | RP         | 11.098          | 206.8377   |                      |                                                                                       | 4        |         | 0.52727                                 | 0.79186 | 0.25   | -0.04 | 0.02   | 0.69  | 1.13                  | 0.22  | 0.37840  | 0.84570 | -0.18 | -0.25 | -0.16                      | -0.79 | -0.18  | -0.02 | 0.42     |   |                       |   |         |   |        |   |
| HILICneg_206.8547_0.53 | neg  | HILIC      | 0.53            | 206.8547   |                      |                                                                                       | 4        |         | 0.12711                                 | 0.46383 | -0.18  | 0.03  | 0.09   | 0.17  | -0.14                 | 0.31  | 0.24645  | 0.76251 | 0.00  | 0.03  | -0.10                      | 0.06  | 0.13   | -0.08 | 0.05     |   |                       |   |         |   |        |   |
| HILICpos_206.8855_2.97 | pos  | HILIC      | 2.97            | 206.8855   |                      |                                                                                       | 4        |         | 0.42153                                 | 0.72423 | -0.25  | 0.05  | 0.47   | -0.16 | -0.23                 | 1.15  | 0.69672  | 0.95088 | -0.13 | -0.24 | 0.02                       | 0.77  | 0.26   | -0.01 | -0.42    |   |                       |   |         |   |        |   |
| HILICneg_206.9435_0.48 | neg  | HILIC      | 0.48            | 206.9435   |                      |                                                                                       | 4        |         | 0.92101                                 | 0.64751 | -0.05  | 0.02  | -0.01  | 0.41  | 0.05                  | -0.12 | 0.26491  | 0.77712 | 0.04  | -0.05 | -0.02                      | 0.00  | 0.09   | 0.12  | -0.01    |   |                       |   |         |   |        |   |
| RPneg_206.9798_1.05    | neg  | RP         | 1.05            | 206.9798   |                      |                                                                                       | 4        |         | 0.79556                                 | 0.92070 | 0.08   | -0.19 | 0.10   | 0.24  | 0.15                  | -0.12 | 0.21312  | 0.72998 | 0.86  | 0.77  | 0.68                       | 0.82  | 0.66   | 0.90  | 0.90     |   |                       |   |         |   |        |   |
| RPneg_206.9798_1.05    | neg  | RP         | 1.05            | 206.9798   |                      |                                                                                       | 4        |         | 0.62937                                 | 0.84321 | 0.11   | -0.09 | 0.21   | 0.10  | 0.51                  | 0.18  | 0.08765  | 0.54659 | 0.45  | 0.18  | 0.09                       | 0.48  | 0.34   | 0.51  | 0.90     |   |                       |   |         |   |        |   |
| HILICneg_206.9969_0.61 | neg  | HILIC      | 0.61            | 206.9969   |                      |                                                                                       | 4        |         | 0.26025                                 | 0.59820 | 0.27   | 0.13  | 0.46   | 0.55  | 0.18                  | 0.31  | 0.00103  | 0.05794 | 0.21  | 0.05  | 0.02                       | 0.28  | 0.50   | 0.33  | -0.03    |   |                       |   |         |   |        |   |
| RPneg_206.9971_2.025   | neg  | RP         | 2.025           | 206.9971   |                      |                                                                                       | 4        |         | 0.25178                                 | 0.59075 | 0.27   | 0.10  | 0.49   | 0.48  | 0.28                  | 0.30  | 0.00000  | 0.00121 | 0.25  | -0.12 | 0.12                       | 0.38  | 0.59   | 0.39  | -0.06    |   |                       |   |         |   |        |   |
| HILICneg_207.0042_3.81 | neg  | HILIC      | 3.81            | 207.0042   |                      |                                                                                       | 4        |         | 0.17583                                 | 0.52105 | -0.14  | -0.19 | 0.00   | -0.09 | 0.03                  | 0.18  | 0.59695  | 0.92780 | -0.13 | 0.06  | -0.23                      | -0.02 | -0.04  | -0.41 | 0.36     |   |                       |   |         |   |        |   |
| RPpos_207.0173_1.6     | pos  | RP         | 1.6             | 207.0173   |                      |                                                                                       | 4        |         | 0.58377                                 | 0.82056 | 0.13   | 0.19  | 0.16   | 0.21  | 0.52                  | 0.09  | 0.12758  | 0.61913 | 0.47  | 0.24  | 0.06                       | 0.39  | 0.42   | 0.52  | 1.18     |   |                       |   |         |   |        |   |
| HILICneg_207.0514_1.1  | neg  | HILIC      | 1.1             | 207.0514   |                      |                                                                                       | 4        |         | 0.52027                                 | 0.78772 | -0.16  | -0.18 | -0.07  | -0.18 | 0.07                  | 0.55  | 0.78748  | 0.96713 | 0.00  | 0.01  | 0.07                       | -0.15 | 0.01   | 0.04  | 0.89     |   |                       |   |         |   |        |   |
| RPneg_207.07756_1.876  | neg  | RP         | 1.876           | 207.0776   |                      |                                                                                       | 4        |         | 0.00498                                 | 0.14081 | -0.68  | -0.48 | -0.05  | -0.65 | -0.89                 | -0.70 | 0.46373  | 0.88698 | -0.24 | -0.17 | -0.12                      | -0.23 | -0.05  | -0.20 | -0.31    |   |                       |   |         |   |        |   |
| HILICneg_207.1031_0.96 | neg  | HILIC      | 0.96            | 207.1031   |                      |                                                                                       | 4        |         | 0.81278                                 | 0.92862 | 0.06   | 0.17  | 0.06   | 0.33  | 0.25                  | -0.09 | 0.93690  | 0.99026 | 0.05  | -0.02 | -0.08                      | 0.42  | 0.10   | 0.09  | -0.43    |   |                       |   |         |   |        |   |
| HILICpos_207.1042_0.46 | pos  | HILIC      | 0.46            | 207.1042   |                      |                                                                                       | 4        |         | 0.36931                                 | 0.68577 | -0.15  | -0.18 | 0.55   | -0.16 | -0.13                 | 0.13  | 0.79225  | 0.96742 | -0.20 | -0.02 | -0.13                      | 0.10  | 0.04   | -1.10 | -0.19    |   |                       |   |         |   |        |   |
| RPpos_207.1103_2.71    | pos  | RP         | 2.71            | 207.1103   |                      |                                                                                       | 4        |         | 0.12758                                 | 0.46409 | -0.10  | 0.05  | 0.13   | -0.02 | 0.00                  | -0.52 | 0.34830  | 0.83042 | -0.15 | -0.12 | -0.21                      | -0.23 | 0.01   | -0.12 | -0.19    |   |                       |   |         |   |        |   |
| HILICpos_207.1129_3.87 | pos  | HILIC      | 3.87            | 207.1129   |                      |                                                                                       | 4        |         | 0.85596                                 | 0.94602 | -0.04  | 0.13  | 1.27   | 0.21  | -0.18                 | -0.64 | 0.00100  | 0.05740 | 1.64  | 1.12  | 2.59                       | 2.78  | 1.53   | 1.10  | -0.02    |   |                       |   |         |   |        |   |
| HILICpos_207.1589_0.42 | pos  |            |                 |            |                      |                                                                                       |          |         |                                         |         |        |       |        |       |                       |       |          |         |       |       |                            |       |        |       |          |   |                       |   |         |   |        |   |

| Feature_ID             | Mode  | Ionization | Average_Rt.min. | Average_Mz | Metabolite | MSMS | ID_Level | HMDB_ID | IV-Alcohol self-administration (IV-ASA) |         |        |       |        |       |                       |       |                       |         |          |       | IV-Alcohol clamp (IV-AC)   |       |                       |       |       |   |                       |   |        |   |   |   |
|------------------------|-------|------------|-----------------|------------|------------|------|----------|---------|-----------------------------------------|---------|--------|-------|--------|-------|-----------------------|-------|-----------------------|---------|----------|-------|----------------------------|-------|-----------------------|-------|-------|---|-----------------------|---|--------|---|---|---|
|                        |       |            |                 |            |            |      |          |         | Area Under the Curve (AUC)              |         |        |       |        |       | IV-Ghrelin or Placebo |       |                       |         |          |       | Area Under the Curve (AUC) |       |                       |       |       |   | IV-Ghrelin or Placebo |   |        |   |   |   |
|                        |       |            |                 |            |            |      |          |         | Baseline                                |         | IV-ASA |       | BRAC=0 |       | Baseline              |       | IV-Ghrelin or Placebo |         | Baseline |       | Post-LD                    |       | IV-Ghrelin or Placebo |       | IV-AC |   | Post-AC               |   | BRAC=0 |   |   |   |
|                        |       |            |                 |            |            |      |          |         | p                                       | q       | d      | d     | d      | d     | d                     | d     | d                     | d       | d        | d     | p                          | q     | d                     | d     | d     | d | d                     | d | d      | d | d | d |
| RPneg_209.04585_4.665  | RP    | neg        | 4.665           | 209.0459   |            |      | 4        |         | 0.91043                                 | 0.96680 | -0.05  | 0.01  | 0.02   | 1.04  | 0.17                  | 0.30  | 0.38213               | 0.84832 | 0.11     | 0.35  | -0.04                      | 0.05  | -0.05                 | -0.09 | 0.79  |   |                       |   |        |   |   |   |
| HILICneg_209.046_0.7   | HILIC | neg        | 0.7             | 209.0460   |            |      | 4        |         | 0.89891                                 | 0.96306 | -0.06  | 0.01  | -0.03  | 0.98  | 0.16                  | 0.22  | 0.36771               | 0.83928 | 0.13     | 0.35  | 0.00                       | -0.16 | 0.11                  | -0.03 | 0.88  |   |                       |   |        |   |   |   |
| HILICneg_209.0669_2.33 | HILIC | neg        | 2.33            | 209.0669   |            |      | 4        |         | 0.70297                                 | 0.87878 | 0.05   | 0.24  | 0.28   | 0.30  | 0.26                  | -0.05 | 0.50236               | 0.90280 | -0.09    | 0.00  | -0.03                      | -0.12 | -0.07                 | -0.16 | -0.02 |   |                       |   |        |   |   |   |
| HILICneg_209.0811_6.98 | HILIC | neg        | 6.98            | 209.0811   |            |      | 4        |         | 0.94555                                 | 0.80105 | -0.18  | 0.02  | 0.35   | 0.01  | -0.03                 | -0.60 | 0.14301               | 0.64534 | 0.12     | 0.29  | 0.29                       | 0.51  | -0.06                 | -0.24 | -0.26 |   |                       |   |        |   |   |   |
| RPneg_209.08238_6.372  | RP    | neg        | 6.372           | 209.0824   |            |      | 4        |         | 0.78017                                 | 0.91390 | 0.07   | 0.06  | 0.13   | 0.03  | 0.11                  | 0.22  | 0.66831               | 0.94638 | -0.06    | 0.06  | -0.08                      | 0.06  | -0.08                 | -0.07 | -0.04 |   |                       |   |        |   |   |   |
| RPneg_209.08531_7.157  | RP    | neg        | 7.157           | 209.0853   |            |      | 4        |         | 0.46007                                 | 0.76451 | -0.17  | -0.04 | -0.07  | 0.04  | -0.15                 | -0.15 | 0.89506               | 0.84343 | 0.05     | 0.07  | 0.04                       | 0.13  | 0.04                  | 0.00  | 0.00  |   |                       |   |        |   |   |   |
| HILICpos_209.0921_4.07 | HILIC | pos        | 4.07            | 209.0921   |            |      | 4        |         | 0.00477                                 | 0.13761 | -0.65  | -0.47 | -0.01  | -0.66 | -0.89                 | -0.80 | 0.68926               | 0.94980 | -0.12    | -0.14 | -0.10                      | -0.15 | 0.13                  | -0.13 | -0.19 |   |                       |   |        |   |   |   |
| HILICpos_209.0922_0.72 | HILIC | pos        | 0.72            | 209.0922   |            |      | 4        |         | 0.10972                                 | 0.44378 | 0.44   | 0.43  | 0.70   | 0.21  | 1.01                  | -0.08 | 0.14265               | 0.64525 | 0.30     | 0.25  | 0.13                       | 0.43  | 0.67                  | 0.34  | -0.13 |   |                       |   |        |   |   |   |
| RPpos_209.0922_1.15    | RP    | pos        | 1.15            | 209.0922   |            |      | 4        |         | 0.02787                                 | 0.28599 | -0.60  | -0.17 | -0.01  | -0.44 | -0.51                 | -0.45 | 0.27117               | 0.78253 | -0.32    | -0.06 | -0.12                      | -0.02 | -0.41                 | -0.57 | -0.01 |   |                       |   |        |   |   |   |
| HILICpos_209.1022_2.35 | HILIC | pos        | 2.35            | 209.1022   |            |      | 4        |         | 0.20879                                 | 0.55169 | 0.39   | 0.07  | 0.62   | 0.58  | 0.98                  | 0.10  | 0.97019               | 0.99673 | -0.03    | -0.07 | -0.01                      | 0.00  | -0.01                 | -0.16 | -0.15 |   |                       |   |        |   |   |   |
| RPpos_209.1171_7.07    | RP    | pos        | 7.07            | 209.1171   |            |      | 4        |         | 0.05610                                 | 0.35868 | -0.36  | -0.23 | 0.55   | -0.14 | -0.60                 | 0.13  | 0.79594               | 0.96826 | -0.20    | -0.32 | -0.03                      | -0.62 | 0.40                  | -0.05 | 0.00  |   |                       |   |        |   |   |   |
| RPpos_209.1172_8.76    | RP    | pos        | 8.76            | 209.1172   |            |      | 4        |         | 0.29924                                 | 0.62886 | -0.17  | -0.11 | -0.09  | -0.12 | 0.03                  | -0.04 | 0.32919               | 0.82035 | 0.13     | 0.12  | 0.10                       | 0.12  | 0.10                  | 0.10  | 0.25  |   |                       |   |        |   |   |   |
| RPneg_209.1181_8.419   | RP    | neg        | 8.419           | 209.1181   |            |      | 4        |         | 0.43324                                 | 0.73204 | 0.15   | -0.07 | 0.75   | 0.31  | 0.01                  | 0.06  | 0.00673               | 0.17372 | 0.28     | 0.09  | 0.12                       | 0.78  | 0.37                  | 0.34  | -0.34 |   |                       |   |        |   |   |   |
| HILICneg_209.1184_0.46 | HILIC | neg        | 0.46            | 209.1184   |            |      | 4        |         | 0.20085                                 | 0.54549 | 0.25   | -0.17 | 0.57   | 0.60  | 0.44                  | 0.01  | 0.00111               | 0.06122 | 0.31     | 0.22  | 0.46                       | 0.36  | 0.26                  | 0.31  | 0.07  |   |                       |   |        |   |   |   |
| HILICpos_209.1387_0.55 | HILIC | pos        | 0.55            | 209.1387   |            |      | 4        |         | 0.88756                                 | 0.95883 | 0.03   | 0.26  | 0.45   | 0.32  | 0.16                  | -0.10 | 0.91667               | 0.98809 | -0.05    | -0.31 | 0.18                       | -0.01 | 0.31                  | -0.35 | 0.52  |   |                       |   |        |   |   |   |
| RPpos_209.1532_11.05   | RP    | pos        | 11.05           | 209.1532   |            |      | 4        |         | 0.15503                                 | 0.49790 | -0.58  | -0.11 | -0.03  | -0.16 | -0.50                 | -0.42 | 0.49707               | 0.90072 | 0.31     | 1.34  | -0.29                      | 0.60  | -0.01                 | 0.26  | 0.76  |   |                       |   |        |   |   |   |
| HILICpos_209.1534_0.38 | HILIC | pos        | 0.38            | 209.1534   |            |      | 4        |         | 0.46717                                 | 0.75554 | -0.29  | -0.15 | -0.06  | 0.00  | -0.08                 | -0.50 | 0.52202               | 0.90888 | 0.28     | 1.44  | -0.30                      | 0.43  | 0.01                  | 0.22  | 0.45  |   |                       |   |        |   |   |   |
| RPpos_209.1535_10.97   | RP    | pos        | 10.97           | 209.1535   |            |      | 4        |         | 0.32396                                 | 0.64965 | -0.38  | -0.15 | 0.09   | 0.04  | -0.31                 | -0.53 | 0.59147               | 0.92661 | 0.22     | 1.24  | -0.23                      | 0.33  | 0.05                  | 0.06  | 0.58  |   |                       |   |        |   |   |   |
| RPpos_209.1902_6.72    | RP    | pos        | 6.72            | 209.1902   |            |      | 4        |         | 0.28178                                 | 0.61580 | 0.06   | 0.28  | 0.10   | 0.38  | 0.81                  | 0.56  | 0.31398               | 0.81205 | 0.72     | 0.40  | -0.08                      | 0.38  | 0.03                  | 0.43  | 0.23  |   |                       |   |        |   |   |   |
| RPneg_209.83377_10.523 | RP    | neg        | 10.523          | 209.8338   |            |      | 4        |         | 0.97402                                 | 0.99026 | 0.05   | -0.02 | -0.06  | 0.15  | 0.14                  | 0.24  | 0.13683               | 0.63503 | 0.13     | 0.00  | 0.15                       | 0.16  | 0.04                  | 0.11  | 0.44  |   |                       |   |        |   |   |   |
| RPneg_209.83398_1.036  | RP    | neg        | 1.036           | 209.8340   |            |      | 4        |         | 0.43203                                 | 0.73143 | -0.21  | 0.16  | -0.40  | -0.02 | 0.02                  | 0.44  | 0.01622               | 0.27246 | -0.39    | 0.00  | -0.59                      | 0.45  | -0.25                 | -0.30 | -0.72 |   |                       |   |        |   |   |   |
| RPneg_209.83432_10.203 | RP    | neg        | 10.203          | 209.8343   |            |      | 4        |         | 0.63436                                 | 0.84494 | 0.10   | 0.47  | 0.31   | 0.50  | 0.22                  | 0.50  | 0.32161               | 0.81567 | 0.17     | -0.19 | 0.37                       | 0.08  | 0.23                  | 0.13  | -0.11 |   |                       |   |        |   |   |   |
| RPneg_209.83435_11.102 | RP    | neg        | 11.102          | 209.8344   |            |      | 4        |         | 0.92406                                 | 0.97276 | -0.06  | -0.13 | 0.07   | 0.42  | -0.20                 | 0.71  | 0.78859               | 0.96713 | -0.07    | 0.19  | -0.16                      | -0.00 | -0.45                 | 0.51  | 0.35  |   |                       |   |        |   |   |   |
| RPneg_209.92307_14.172 | RP    | neg        | 14.172          | 209.9231   |            |      | 4        |         | 0.97378                                 | 0.99026 | -0.02  | 0.33  | -0.04  | 0.46  | -0.22                 | 0.73  | 0.00076               | 0.04774 | -0.24    | -0.44 | -0.48                      | 0.34  | -0.11                 | -0.55 | 0.07  |   |                       |   |        |   |   |   |
| HILICneg_209.9248_0.54 | HILIC | neg        | 0.54            | 209.9248   |            |      | 4        |         | 0.00860                                 | 0.18214 | -0.39  | 0.01  | -0.34  | -0.03 | -0.47                 | -0.44 | 0.54934               | 0.91721 | -0.03    | 0.09  | 0.00                       | -0.03 | -0.11                 | 0.10  | 0.01  |   |                       |   |        |   |   |   |
| HILICneg_209.9495_0.92 | HILIC | neg        | 0.92            | 209.9495   |            |      | 4        |         | 0.11395                                 | 0.44972 | -0.36  | -0.49 | -0.37  | -0.12 | -0.37                 | -0.31 | 0.31271               | 0.81018 | -0.26    | -0.32 | -0.31                      | -0.32 | -0.16                 | -0.28 | 0.24  |   |                       |   |        |   |   |   |
| HILICneg_209.9508_1.24 | HILIC | neg        | 1.24            | 209.9508   |            |      | 4        |         | 0.02779                                 | 0.28599 | -0.12  | 0.06  | 0.14   | 0.00  | 0.24                  | -0.16 | 0.40133               | 0.85838 | -0.14    | -0.21 | 0.02                       | 0.01  | 0.05                  | -0.19 | -0.51 |   |                       |   |        |   |   |   |
| HILICpos_210.0045_0.94 | HILIC | pos        | 0.94            | 210.0045   |            |      | 4        |         | 0.46952                                 | 0.75681 | 0.11   | 0.23  | 0.26   | 0.22  | 0.32                  | -0.29 | 0.00219               | 0.09208 | -0.46    | -0.53 | -0.59                      | -0.41 | -0.38                 | -0.37 | -0.60 |   |                       |   |        |   |   |   |
| HILICpos_210.0169_6.09 | HILIC | pos        | 6.09            | 210.0169   |            |      | 4        |         | 0.54516                                 | 0.80095 | -0.07  | 0.21  | 0.22   | 0.02  | 0.01                  | -1.06 | 0.34708               | 0.82996 | 0.45     | 0.28  | 0.78                       | 0.97  | 0.50                  | 0.04  | -0.05 |   |                       |   |        |   |   |   |
| HILICpos_210.0497_3.87 | HILIC | pos        | 3.87            | 210.0497   |            |      | 4        |         | 0.89320                                 | 0.96136 | -0.04  | 0.24  | 0.98   | 0.44  | -0.44                 | -0.65 | 0.00269               | 0.10390 | 1.28     | 0.55  | 2.65                       | 1.98  | 1.29                  | 0.12  | 0.37  |   |                       |   |        |   |   |   |
| RPpos_210.0587_4.99    | RP    | pos        | 4.99            | 210.0587   |            |      | 4        |         | 0.00876                                 | 0.18386 | -0.82  | -0.69 | -0.96  | -0.01 | -0.21                 | 0.25  | 0.66668               | 0.94404 | -0.13    | -0.12 | -0.34                      | -0.26 | 0.36                  | -0.43 | 0.32  |   |                       |   |        |   |   |   |
| HILICneg_210.0657_6.41 | HILIC | neg        | 6.41            | 210.0657   |            |      | 4        |         | 0.02550                                 | 0.27911 | -0.49  | 0.16  | -0.02  | -0.32 | -0.36                 | -0.73 | 0.91819               | 0.99851 | -0.05    | 0.18  | 0.16                       | 0.16  | -0.22                 | -0.44 | -0.01 |   |                       |   |        |   |   |   |
| RPneg_210.1352_6.526   | RP    | neg        | 6.526           | 210.1352   |            |      | 4        |         | 0.00390                                 | 0.25228 | -0.67  | 0.40  | -0.17  | 0.79  | 0.62                  | -0.38 | 0.70843               | 0.95262 | 0.10     | -0.40 | -0.11                      | 0.52  | 0.19                  | 0.04  | 0.66  |   |                       |   |        |   |   |   |
| HILICpos_210.17_0.47   | HILIC | pos        | 0.47            | 210.1700   |            |      | 4        |         | 0.31104                                 | 0.63927 | 3.30   | 2.94  | 3.01   | 3.35  | 3.47                  | 6.22  | 0.35065               | 0.83164 | 15.92    | 10.13 | 8.45                       | 12.95 | 10.00                 | 16.99 | 20.41 |   |                       |   |        |   |   |   |
| RPpos_210.1849_11.05   | RP    | pos        | 11.05           | 210.1849   |            |      | 4        |         | 0.20248                                 | 0.54724 | -0.47  | -0.19 | -0.01  | -0.16 | -0.46                 | -0.41 | 0.52282               | 0.90914 | 0.30     | 1.30  | -0.28                      | 0.69  | 0.02                  | 0.25  | 0.52  |   |                       |   |        |   |   |   |
| RPpos_210.185_10.97    | RP    | pos        | 10.97           | 210.1850   |            |      | 4        |         | 0.27275                                 | 0.60876 | -0.40  | -0.20 | -0.09  | 0.01  | -0.38                 | -0.48 | 0.64689               | 0.93869 | 0.22     | 1.29  | -0.33                      | 0.50  | -0.02                 | 0.16  | 0.64  |   |                       |   |        |   |   |   |
| HILICneg_210.7834_1.48 | HILIC | neg        | 1.48            | 210.7834   |            |      | 4        |         | 0.07743                                 | 0.39859 | -0.24  | 0.31  | -0.29  | -0.06 | 0.00                  | -0.18 | 0.38313               | 0.84854 | -0.13    | -0.24 | -0.15                      | -0.29 | -0.23                 | 0.35  | -0.06 |   |                       |   |        |   |   |   |
| HILICneg_210.8672_0.92 | HILIC | neg        | 0.92            | 210.8672   |            |      | 4        |         | 0.03726                                 | 0.31384 | -0.67  | 0.24  | -0.68  | 0.05  | -0.33                 | -0.16 | 0.21929               | 0.73576 | 0.27     | 0.16  | 0.18                       | 0.20  | 0.30                  | 0.24  | 0.29  |   |                       |   |        |   |   |   |
| HILICneg_210.8847_4.65 | HILIC | neg        | 4.65            | 210.8847   |            |      | 4        |         | 0.60377                                 | 0.83118 | 0.18   | 0.03  | 0.24   | 0.63  | -0.03                 | 0.33  | 0.60726               | 0.92933 | 0.12     | -0.13 | 0.32                       | -0.34 | 0.97                  | 0.10  | -0.32 |   |                       |   |        |   |   |   |
| HILICneg_210.9317_3.21 | HILIC | neg        | 3.21            | 210.9317   |            |      | 4        |         | 0.01182                                 | 0.20835 | -0.72  | 0.40  | -0.39  | -0.88 | -0.41                 | -0.09 | 0.98939               | 0.99815 | -0.06    | -0.24 | -0.16                      | -0.27 | -0.09                 | 0.33  | 0.37  |   |                       |   |        |   |   |   |
| HILICneg_210.9318_4.36 | HILIC | neg        | 4.36            | 210.9318   |            |      | 4        |         | 0.08147                                 | 0.40618 | -0.47  | -0.25 | -0.10  | 0.06  | -0.21                 | -0.41 | 0.37803               | 0.84565 | 0.07     | -0.18 | 0.00                       | 0.72  | -0.21                 | -0.31 | 0.26  |   |                       |   |        |   |   |   |
| HILICneg_210.9321_3.33 | HILIC | neg        | 3.33            | 210.9321   |            |      | 4        |         | 0.12956                                 | 0.46612 | -0.49  | 0.06  | 0.09   | 0.12  | -0.31                 | -0.43 | 0.65982               | 0.94229 | -0.10    | -0.38 | -0.31                      | -0.27 | -0.14                 | 0.14  | 0.13  |   |                       |   |        |   |   |   |
| HILICneg_210.9323_5.41 | HILIC | neg        | 5.41            | 210.9323   |            |      | 4        |         | 0.02735                                 | 0.28442 | -0.68  | -0.65 | -0.29  | 0.33  | -0.30                 | -0.76 | 0.78549               | 0.96676 | -0.22    | 0.23  | -0.14                      | 0.55  | -1.37                 | 0.01  | -0.90 |   |                       |   |        |   |   |   |
| HILICneg_210.9323_5.85 | HILIC | neg        | 5.85            | 210.9323   |            |      | 4        |         | 0.42728                                 |         |        |       |        |       |                       |       |                       |         |          |       |                            |       |                       |       |       |   |                       |   |        |   |   |   |

| Feature_ID              | Mode  | Ionization | Average_Rt.min. | Average_Mz | Metabolite | MSMS | ID_Level | HMDB_ID | IV-Alcohol self-administration (IV-ASA) |       |       |       |       |                       |       |         |         |       | IV-Alcohol clamp (IV-AC)   |       |       |       |       |                       |      |   |   |   |
|-------------------------|-------|------------|-----------------|------------|------------|------|----------|---------|-----------------------------------------|-------|-------|-------|-------|-----------------------|-------|---------|---------|-------|----------------------------|-------|-------|-------|-------|-----------------------|------|---|---|---|
|                         |       |            |                 |            |            |      |          |         | Area Under the Curve (AUC)              |       |       |       |       | IV-Ghrelin or Placebo |       |         |         |       | Area Under the Curve (AUC) |       |       |       |       | IV-Ghrelin or Placebo |      |   |   |   |
|                         |       |            |                 |            |            |      |          |         | Baseline                                |       |       |       |       | BrAC=0                |       |         |         |       | Baseline                   |       |       |       |       | Post-LD               |      |   |   |   |
|                         |       |            |                 |            |            |      |          |         | p                                       | q     | d     | d     | d     | d                     | d     | d       | d       | d     | p                          | q     | d     | d     | d     | d                     | d    | d | d | d |
| RPneg_212.00246_3.764   | RP    | neg        | 3.764           | 212.0025   |            | 4    |          | 0.26837 | 0.60425                                 | 0.28  | 0.20  | 0.29  | 0.57  | 0.43                  | 0.48  | 0.34628 | 0.82929 | 0.28  | -0.04                      | 0.35  | 0.13  | 0.33  | 0.22  | 0.59                  |      |   |   |   |
| HILICneg_212.00246_0.43 | HILIC | neg        | 0.43            | 212.0026   |            | 4    |          | 0.39721 | 0.70692                                 | -0.21 | -0.25 | -0.20 | 0.09  | -0.15                 | -0.45 | 0.22541 | 0.74215 | 0.79  | 0.26                       | 0.12  | -0.10 | 0.10  | 0.14  | 8.12                  |      |   |   |   |
| RPneg_212.00262_3.072   | RP    | neg        | 3.072           | 212.0026   |            | 4    |          | 0.00329 | 0.11843                                 | 0.44  | 0.33  | 0.54  | 0.48  | 0.69                  | 0.73  | 0.80092 | 0.96970 | 0.04  | -0.19                      | 0.03  | 0.01  | 0.02  | 0.16  | 0.44                  |      |   |   |   |
| RPneg_212.00264_2.515   | RP    | neg        | 2.515           | 212.0026   |            | 4    |          | 0.01267 | 0.21548                                 | 0.51  | 0.43  | 0.75  | 0.94  | 0.23                  | 0.73  | 0.51309 | 0.90648 | 0.11  | -0.06                      | 0.37  | -0.07 | 0.08  | 0.16  | 0.41                  |      |   |   |   |
| RPneg_212.00282_2.15    | RP    | neg        | 2.15            | 212.0028   |            | 4    |          | 0.03735 | 0.31395                                 | 0.51  | -0.37 | 0.68  | 0.47  | 0.63                  | 0.83  | 0.37203 | 0.84160 | -0.18 | 0.16                       | -0.17 | -0.20 | -0.20 | -0.21 | 0.35                  |      |   |   |   |
| RPneg_212.00284_0.663   | RP    | neg        | 0.663           | 212.0028   |            | 4    |          | 0.00718 | 0.16717                                 | 0.58  | 0.57  | 0.40  | 0.43  | 0.69                  | 0.80  | 0.21063 | 0.77119 | 0.22  | 0.14                       | 0.29  | 0.12  | 0.20  | 0.18  | 0.38                  |      |   |   |   |
| RPneg_212.00287_1.957   | RP    | neg        | 1.957           | 212.0029   |            | 4    |          | 0.06160 | 0.36878                                 | 0.47  | 0.32  | 0.67  | 0.37  | 0.53                  | 0.83  | 0.40317 | 0.85869 | -0.15 | -0.17                      | -0.15 | -0.22 | -0.18 | -0.17 | 0.16                  |      |   |   |   |
| RPneg_212.00288_4.815   | RP    | neg        | 4.815           | 212.0029   |            | 4    |          | 0.90350 | 0.96446                                 | 0.07  | 0.08  | 0.16  | 0.06  | 0.16                  | 0.10  | 0.61861 | 0.93265 | 0.18  | 0.13                       | 0.11  | 0.17  | 0.12  | 0.18  | 0.34                  |      |   |   |   |
| HILICneg_212.0293_1.76  | HILIC | neg        | 1.76            | 212.0293   |            | 4    |          | 0.77978 | 0.91373                                 | 0.09  | 0.17  | 0.20  | 0.56  | 0.18                  | -0.21 | 0.40297 | 0.85869 | -0.22 | -0.06                      | -0.15 | -0.36 | -0.09 | -0.33 | -0.18                 |      |   |   |   |
| HILICneg_212.0337_0.96  | HILIC | neg        | 0.96            | 212.0337   |            | 4    |          | 0.95263 | 0.98268                                 | -0.01 | -0.06 | -0.07 | 0.37  | 0.21                  | -0.25 | 0.15288 | 0.65844 | 0.32  | 0.11                       | 0.53  | 0.22  | 0.30  | 0.46  | 0.03                  |      |   |   |   |
| HILICneg_212.0622_6.41  | HILIC | neg        | 6.41            | 212.0622   |            | 4    |          | 0.01536 | 0.23277                                 | -0.52 | 0.10  | -0.03 | -0.35 | -0.41                 | -0.76 | 0.79312 | 0.96753 | -0.08 | 0.32                       | 0.17  | 0.11  | -0.31 | -0.48 | -0.09                 |      |   |   |   |
| HILICneg_212.0737_2.93  | HILIC | pos        | 2.93            | 212.0737   |            | 4    |          | 0.16856 | 0.51356                                 | -0.16 | -0.02 | -0.07 | 0.12  | -0.07                 | -0.22 | 0.15603 | 0.66272 | -0.08 | 0.01                       | -0.08 | -0.13 | -0.10 | -0.09 | 0.05                  |      |   |   |   |
| HILICpos_212.0919_2.36  | HILIC | pos        | 2.36            | 212.0919   |            | 4    |          | 0.43413 | 0.73275                                 | -0.13 | -0.01 | -0.13 | -0.19 | 0.10                  | 0.45  | 0.09066 | 0.55453 | 0.26  | 0.00                       | 0.11  | 0.38  | 0.59  | 0.51  | -0.21                 |      |   |   |   |
| HILICpos_212.1006_6.18  | HILIC | pos        | 6.18            | 212.1006   |            | 4    |          | 0.20903 | 0.55194                                 | 0.26  | 0.31  | 0.59  | 0.49  | 0.22                  | -0.35 | 0.16970 | 0.68207 | 0.43  | 0.48                       | 0.45  | 0.71  | 0.66  | 0.23  | 0.10                  |      |   |   |   |
| HILICpos_212.1027_5.61  | HILIC | pos        | 5.61            | 212.1027   |            | 4    |          | 0.44767 | 0.74273                                 | -0.04 | 0.05  | -0.03 | 0.05  | 0.17                  | -0.42 | 0.82866 | 0.97434 | -0.04 | -0.06                      | 0.06  | -0.08 | -0.08 | 0.01  | -0.14                 |      |   |   |   |
| HILICpos_212.1028_5.32  | HILIC | pos        | 5.32            | 212.1028   |            | 4    |          | 0.90388 | 0.96456                                 | 0.28  | 0.44  | 0.44  | 0.38  | 0.51                  | -0.34 | 0.35181 | 0.83198 | -0.17 | -0.22                      | -0.12 | -0.20 | -0.11 | -0.15 | -0.18                 |      |   |   |   |
| HILICpos_212.1046_5.11  | HILIC | pos        | 5.11            | 212.1046   |            | 4    |          | 0.14287 | 0.48308                                 | 0.33  | -0.20 | 0.38  | 0.43  | 0.19                  | -0.48 | 0.76965 | 0.96458 | 0.02  | 0.24                       | -0.39 | 0.22  | 0.13  | 0.14  | -0.29                 |      |   |   |   |
| HILICpos_212.1183_0.55  | HILIC | pos        | 0.55            | 212.1183   |            | 4    |          | 0.00091 | 0.06059                                 | -0.61 | -0.17 | -0.19 | -0.45 | -0.17                 | -0.45 | 0.32270 | 0.81618 | -0.30 | 1.05                       | 0.57  | -0.45 | 0.15  | 0.35  | -0.37                 |      |   |   |   |
| RPpos_212.1187_3.82     | RP    | pos        | 3.82            | 212.1187   |            | 4    |          | 0.00309 | 0.11399                                 | -0.53 | -0.18 | -0.14 | -0.37 | -0.13                 | -0.44 | 0.31427 | 0.81205 | -0.28 | 1.03                       | 0.63  | -0.40 | 0.14  | 0.15  | -0.05                 | 0.35 |   |   |   |
| HILICpos_212.1488_0.62  | HILIC | pos        | 0.62            | 212.1488   |            | 4    |          | 0.01408 | 0.22486                                 | 0.51  | -0.48 | -0.29 | 0.17  | 0.50                  | 0.17  | 0.38509 | 0.84935 | 0.31  | -0.42                      | 0.18  | 0.40  | 0.04  | 0.10  | 0.55                  |      |   |   |   |
| RPpos_212.1495_2.59     | RP    | pos        | 2.59            | 212.1495   |            | 4    |          | 0.13290 | 0.47119                                 | -0.53 | 0.18  | 0.40  | -0.53 | -0.05                 | -0.43 | 0.79047 | 0.96713 | -0.04 | -0.02                      | -0.34 | 0.18  | 0.13  | 0.11  | -0.78                 |      |   |   |   |
| HILICneg_212.8852_0.93  | HILIC | neg        | 0.93            | 212.8852   |            | 4    |          | 0.13139 | 0.46860                                 | -0.29 | -0.23 | -0.26 | 0.05  | -0.33                 | -0.17 | 0.26558 | 0.77769 | -0.24 | -0.43                      | -0.17 | -0.37 | -0.02 | -0.21 | 0.12                  |      |   |   |   |
| RPneg_212.91078_10.524  | RP    | neg        | 10.524          | 212.9108   |            | 4    |          | 0.16284 | 0.50745                                 | -0.32 | 0.33  | -0.22 | 0.09  | 0.00                  | 0.32  | 0.96076 | 0.99553 | -0.06 | -0.52                      | -0.05 | -0.60 | 0.25  | 0.10  | 0.31                  |      |   |   |   |
| RPneg_212.91135_13.791  | RP    | neg        | 13.791          | 212.9114   |            | 4    |          | 0.21507 | 0.55768                                 | -0.47 | -0.37 | -0.53 | 0.46  | -0.16                 | -0.46 | 0.81508 | 0.97182 | -0.13 | -0.45                      | -0.30 | 0.44  | -0.26 | 0.00  | -0.01                 |      |   |   |   |
| HILICneg_212.9209_3.06  | HILIC | neg        | 3.06            | 212.9209   |            | 4    |          | 0.46606 | 0.75480                                 | -0.25 | 0.12  | 0.47  | -0.15 | -0.22                 | 1.26  | 0.75403 | 0.96233 | -0.11 | -0.30                      | 0.08  | 0.65  | 0.25  | 0.03  | -0.44                 |      |   |   |   |
| HILICneg_212.9792_1.35  | HILIC | neg        | 1.35            | 212.9792   |            | 4    |          | 0.21665 | 0.55863                                 | -0.33 | -0.19 | -0.21 | 0.05  | -0.43                 | 0.42  | 0.81814 | 0.97238 | -0.02 | 1.13                       | -0.20 | -0.40 | 0.58  | -0.29 | 0.17                  |      |   |   |   |
| HILICneg_213.0175_0.87  | HILIC | neg        | 0.87            | 213.0175   |            | 4    |          | 0.98004 | 0.99236                                 | 0.02  | 0.23  | 1.00  | 0.59  | 0.22                  | -0.12 | 0.02374 | 0.32555 | 0.59  | 0.14                       | 0.22  | 0.50  | 0.93  | 0.88  | 0.19                  |      |   |   |   |
| RPneg_213.02281_5.577   | RP    | neg        | 5.577           | 213.0228   |            | 4    |          | 0.12801 | 0.46431                                 | 0.88  | 0.82  | 0.83  | 1.63  | 0.90                  | 1.63  | 0.47868 | 0.89396 | 0.23  | 0.20                       | 0.24  | 0.21  | 0.23  | 0.23  | 0.19                  |      |   |   |   |
| RPneg_213.02281_5.221   | RP    | neg        | 5.221           | 213.0228   |            | 4    |          | 0.93444 | 0.97646                                 | 0.02  | -0.01 | 0.03  | 0.03  | 0.12                  | 0.45  | 0.32551 | 0.81845 | -0.23 | -0.28                      | -0.16 | -0.19 | -0.18 | -0.31 | -0.39                 |      |   |   |   |
| RPneg_213.02289_5.39    | RP    | neg        | 5.39            | 213.0229   |            | 4    |          | 0.32712 | 0.65209                                 | -0.29 | -0.16 | -0.12 | -0.26 | -0.12                 | -0.24 | 0.03218 | 0.23564 | 2.73  | 1.94                       | 2.31  | 2.21  | 2.24  | 2.18  | 0.76                  |      |   |   |   |
| HILICneg_213.0229_0.45  | HILIC | neg        | 0.45            | 213.0229   |            | 4    |          | 0.35432 | 0.67380                                 | 0.48  | 0.46  | 0.51  | 0.82  | 0.68                  | 0.69  | 0.11728 | 0.60196 | 0.66  | 0.64                       | 0.68  | 0.65  | 0.64  | 0.71  | 0.56                  |      |   |   |   |
| RPpos_213.0238_1.6      | RP    | pos        | 1.6             | 213.0238   |            | 4    |          | 0.94661 | 0.98034                                 | 0.02  | -0.12 | -0.01 | 0.07  | 0.42                  | 0.05  | 0.11486 | 0.59882 | 0.46  | 0.05                       | 0.11  | 0.16  | 0.69  | 0.47  | 1.28                  |      |   |   |   |
| RPpos_213.024_1.37      | RP    | pos        | 1.37            | 213.0240   |            | 4    |          | 0.23704 | 0.57864                                 | 0.33  | 0.11  | 0.09  | 0.25  | 0.12                  | 0.11  | 0.14459 | 0.88025 | 0.75  | 0.15                       | 0.37  | 1.43  | 0.19  | -0.09 | 0.88                  |      |   |   |   |
| RPpos_213.024_1.06      | RP    | pos        | 1.06            | 213.0240   |            | 4    |          | 0.69760 | 0.87622                                 | 0.11  | -0.07 | 0.20  | 0.32  | 0.29                  | -0.16 | 0.01676 | 0.27723 | 0.81  | 0.25                       | 0.46  | 0.32  | 0.88  | 0.36  | 1.39                  |      |   |   |   |
| HILICneg_213.0494_6.17  | HILIC | neg        | 6.17            | 213.0494   |            | 4    |          | 0.53645 | 0.79678                                 | -0.21 | 0.05  | 0.36  | 0.01  | 0.01                  | -0.12 | 0.00893 | 0.20091 | 0.23  | 0.35                       | 0.36  | 0.47  | 0.31  | 0.20  | -0.17                 |      |   |   |   |
| HILICpos_213.0636_5.81  | HILIC | pos        | 5.81            | 213.0636   |            | 4    |          | 0.16779 | 0.51311                                 | 0.33  | 0.31  | 0.91  | 0.45  | 0.15                  | -0.49 | 0.00146 | 0.07206 | 0.78  | 0.35                       | 0.90  | 0.96  | 0.87  | 0.60  | 0.13                  |      |   |   |   |
| HILICpos_213.0748_6.94  | HILIC | pos        | 6.94            | 213.0748   |            | 4    |          | 0.44135 | 0.73821                                 | -0.20 | 0.00  | 0.22  | 0.07  | -0.01                 | -0.29 | 0.06292 | 0.48765 | 0.23  | 0.26                       | 0.46  | 0.44  | 0.20  | 0.11  | -0.28                 |      |   |   |   |
| RPneg_213.11305_7.069   | RP    | neg        | 7.069           | 213.1131   |            | 4    |          | 0.21760 | 0.55946                                 | 0.37  | 0.49  | 1.01  | 0.53  | -0.32                 | 0.63  | 0.08493 | 0.54143 | 0.86  | 0.96                       | 0.43  | 1.50  | 0.76  | 0.38  | -0.45                 |      |   |   |   |
| HILICpos_213.1232_5.47  | HILIC | pos        | 5.47            | 213.1232   |            | 4    |          | 0.35455 | 0.67397                                 | 0.12  | 0.24  | 0.30  | 0.24  | -0.05                 | 0.62  | 0.11799 | 0.60341 | -0.14 | -0.05                      | -0.10 | -0.15 | 0.08  | -0.25 | -0.34                 |      |   |   |   |
| HILICpos_213.1232_5.21  | HILIC | pos        | 5.21            | 213.1232   |            | 4    |          | 0.37365 | 0.68940                                 | 0.16  | 0.13  | 0.31  | 0.17  | 0.06                  | 0.92  | 0.23385 | 0.75116 | -0.12 | -0.10                      | -0.09 | -0.17 | -0.10 | -0.17 | 0.06                  |      |   |   |   |
| RPneg_213.14977_8.605   | RP    | neg        | 8.605           | 213.1498   |            | 4    |          | 0.07793 | 0.39986                                 | 0.89  | -0.02 | 0.75  | 0.74  | 1.60                  | 0.27  | 0.02527 | 0.33471 | 0.74  | 0.72                       | 0.87  | 0.84  | 0.10  | 0.37  | 0.48                  |      |   |   |   |
| HILICneg_213.1498_0.44  | HILIC | neg        | 0.44            | 213.1498   |            | 4    |          | 0.04401 | 0.33333                                 | 1.11  | 0.07  | 0.59  | 0.91  | 2.02                  | 0.50  | 0.07998 | 0.53017 | 0.98  | 0.83                       | 1.17  | 0.70  | 0.20  | 0.37  | 0.19                  |      |   |   |   |
| RPneg_213.14999_8.247   | RP    | neg        | 8.247           | 213.1500   |            | 4    |          | 0.56768 | 0.81283                                 | 0.14  | -0.01 | 0.59  | 0.25  | 0.47                  | -0.26 | 0.00415 | 0.13364 | 0.61  | 0.10                       | 0.50  | 0.93  | 0.61  | 0.39  | 0.43                  |      |   |   |   |
| RPneg_213.15002_8.671   | RP    | neg        | 8.671           | 213.1500   |            | 4    |          | 0.13784 | 0.47749                                 | 0.77  | 0.12  | 0.52  | 1.00  | 2.23                  | 0.55  | 0.16766 | 0.67853 | 0.84  | 0.37                       | 0.86  | 1.40  | 0.89  | 1.96  | 0.09                  |      |   |   |   |
| HILICneg_213.784_1.43   | HILIC | neg        | 1.43            | 213.7840   |            | 4    |          | 0.74383 | 0.89774                                 | -0.16 | 0.55  | -0.14 | 0.33  | 0                     |       |         |         |       |                            |       |       |       |       |                       |      |   |   |   |

| Feature_ID             | Mode  | Ionization | Average_Rt.min. | Average_Mz | Metabolite | MSMS | ID_Level | HMDB_ID | IV-Alcohol self-administration (IV-ASA) |         |       |        |       |       |                       |       |   |         |         |       | IV-Alcohol clamp (IV-AC)   |       |       |         |       |       |                       |   |   |         |   |   |
|------------------------|-------|------------|-----------------|------------|------------|------|----------|---------|-----------------------------------------|---------|-------|--------|-------|-------|-----------------------|-------|---|---------|---------|-------|----------------------------|-------|-------|---------|-------|-------|-----------------------|---|---|---------|---|---|
|                        |       |            |                 |            |            |      |          |         | Area Under the Curve (AUC)              |         |       |        |       |       | IV-Ghrelin or Placebo |       |   |         |         |       | Area Under the Curve (AUC) |       |       |         |       |       | IV-Ghrelin or Placebo |   |   |         |   |   |
|                        |       |            |                 |            |            |      |          |         | Baseline                                |         |       | IV-ASA |       |       | Ghrelin               |       |   | Placebo |         |       | Baseline                   |       |       | Post-LD |       |       | IV-AC                 |   |   | Post-AC |   |   |
|                        |       |            |                 |            |            |      |          |         | p                                       | q       | d     | d      | d     | d     | d                     | d     | d | d       | d       | d     | p                          | q     | d     | d       | d     | d     | d                     | d | d | d       | d | d |
| RPneg_215.03323_2.112  | RP    | neg        | 2.112           | 215.0332   |            |      | 4        |         | 0.93599                                 | 0.97697 | 0.06  | 0.46   | 0.78  | 0.24  | 0.19                  | -0.20 |   | 0.00774 | 0.18616 | 1.12  | 0.28                       | 2.12  | 2.11  | 1.74    | 0.57  | 0.33  |                       |   |   |         |   |   |
| HILICneg_215.0334_5.69 | HILIC | neg        | 5.69            | 215.0334   |            |      | 4        |         | 0.11193                                 | 0.44747 | 0.47  | -0.20  | 1.05  | 0.33  | 0.82                  | 0.61  |   | 0.00113 | 0.06157 | 0.56  | 0.11                       | 0.39  | 0.89  | 0.94    | 0.36  | 0.28  |                       |   |   |         |   |   |
| HILICneg_215.0334_6.28 | HILIC | neg        | 6.28            | 215.0334   |            |      | 4        |         | 0.30679                                 | 0.63538 | 0.27  | 0.30   | 0.65  | 0.82  | 0.59                  | -0.31 |   | 0.47847 | 0.89396 | 0.17  | 0.12                       | 0.14  | 0.20  | 0.17    | 0.16  | 0.13  |                       |   |   |         |   |   |
| HILICneg_215.0334_5.85 | HILIC | neg        | 5.85            | 215.0334   |            |      | 4        |         | 0.34368                                 | 0.66510 | 0.28  | 0.03   | 0.92  | 0.38  | 0.47                  | 0.24  |   | 0.05850 | 0.47542 | 0.83  | -0.04                      | 0.64  | 0.58  | 0.99    | 0.76  | 0.70  |                       |   |   |         |   |   |
| HILICneg_215.0335_5.96 | HILIC | neg        | 5.96            | 215.0335   |            |      | 4        |         | 0.50089                                 | 0.76777 | 0.05  | 0.17   | 0.42  | 0.21  | 0.11                  | -0.24 |   | 0.07490 | 0.79893 | 0.25  | 0.14                       | 0.26  | 0.40  | 0.41    | 0.20  | -0.22 |                       |   |   |         |   |   |
| HILICneg_215.0335_5.15 | HILIC | neg        | 5.15            | 215.0335   |            |      | 4        |         | 0.61432                                 | 0.83571 | 0.04  | 0.23   | 0.15  | 0.20  | 0.36                  | 0.04  |   | 0.81754 | 0.01722 | 0.07  | 0.24                       | 0.01  | 0.22  | 0.05    | 0.03  | -0.01 |                       |   |   |         |   |   |
| RPneg_215.03873_5.754  | RP    | neg        | 5.754           | 215.0387   |            |      | 4        |         | 0.48564                                 | 0.76790 | -0.04 | -0.01  | 0.04  | -0.08 | 0.00                  | 0.19  |   | 0.03697 | 0.39245 | -0.30 | -0.39                      | -0.27 | -0.19 | -0.36   | -0.32 | -0.36 |                       |   |   |         |   |   |
| RPneg_215.03877_5.851  | RP    | neg        | 5.851           | 215.0388   |            |      | 4        |         | 0.69848                                 | 0.87652 | 0.00  | -0.12  | 0.00  | -0.02 | 0.03                  | 0.59  |   | 0.18978 | 0.70521 | -0.30 | -0.45                      | -0.15 | -0.25 | -0.39   | -0.23 | -0.33 |                       |   |   |         |   |   |
| RPneg_215.03879_6.07   | RP    | neg        | 6.07            | 215.0388   |            |      | 4        |         | 0.52138                                 | 0.78850 | 0.14  | 0.15   | 0.31  | 0.26  | 0.29                  | -0.02 |   | 0.76323 | 0.96312 | 0.28  | 0.29                       | 0.37  | 0.21  | 0.32    | 0.36  | 0.07  |                       |   |   |         |   |   |
| HILICneg_215.0733_0.68 | HILIC | neg        | 0.68            | 215.0733   |            |      | 4        |         | 0.10580                                 | 0.43876 | 0.46  | -0.09  | 0.67  | 1.02  | 0.51                  | -0.05 |   | 0.00153 | 0.07429 | 1.95  | 0.92                       | 1.16  | 2.14  | 3.84    | 4.15  | 0.45  |                       |   |   |         |   |   |
| HILICneg_215.0739_1.24 | HILIC | neg        | 1.24            | 215.0739   |            |      | 4        |         | 0.50120                                 | 0.77682 | 0.14  | 0.44   | 0.15  | 0.12  | 0.35                  | 0.17  |   | 0.04206 | 0.41487 | 1.00  | 0.45                       | 0.53  | 0.26  | 1.45    | 0.83  | 1.57  |                       |   |   |         |   |   |
| HILICpos_215.114_5.79  | HILIC | pos        | 5.79            | 215.1140   |            |      | 4        |         | 0.41807                                 | 0.72193 | 0.24  | 0.12   | 0.59  | 0.51  | 0.19                  | -0.57 |   | 0.05028 | 0.44641 | 0.91  | 0.59                       | 1.12  | 1.06  | 0.91    | 0.52  | 0.05  |                       |   |   |         |   |   |
| RPpos_215.1645_7.96    | RP    | pos        | 7.96            | 215.1645   |            |      | 4        |         | 0.07145                                 | 0.38705 | -0.51 | -0.53  | -0.23 | 0.30  | -0.30                 | 0.28  |   | 0.16261 | 0.67260 | 0.34  | -0.21                      | 1.00  | 0.13  | -0.13   | 0.65  | 1.06  |                       |   |   |         |   |   |
| RPpos_215.1645_7.06    | RP    | pos        | 7.06            | 215.1645   |            |      | 4        |         | 0.03697                                 | 0.31316 | -0.59 | 0.20   | 0.10  | 0.23  | -0.53                 | 0.08  |   | 0.62996 | 0.93531 | 0.05  | 0.02                       | -0.40 | -0.31 | 0.58    | 0.55  | 0.70  |                       |   |   |         |   |   |
| RPneg_215.16571_9.062  | RP    | neg        | 9.062           | 215.1657   |            |      | 4        |         | 0.08042                                 | 0.40483 | 1.00  | 0.06   | 0.86  | 1.05  | 1.54                  | 0.18  |   | 0.23144 | 0.74813 | 0.70  | 0.51                       | 0.94  | 1.26  | 0.30    | 1.29  | 0.12  |                       |   |   |         |   |   |
| RPneg_215.16573_8.907  | RP    | neg        | 8.907           | 215.1657   |            |      | 4        |         | 0.03430                                 | 0.30469 | -0.35 | -0.04  | -0.40 | -0.20 | 0.02                  | 0.34  |   | 0.32807 | 0.81922 | -0.20 | 0.13                       | 0.12  | -0.29 | -0.55   | -0.03 | 0.11  |                       |   |   |         |   |   |
| HILICneg_215.7815_1.5  | HILIC | neg        | 1.5             | 215.7815   |            |      | 4        |         | 0.11994                                 | 0.45565 | -0.34 | -0.09  | -0.24 | -0.30 | 0.25                  | -0.28 |   | 0.10644 | 0.58488 | -0.30 | -0.73                      | -0.26 | -0.72 | -0.26   | -0.03 | 0.14  |                       |   |   |         |   |   |
| HILICneg_215.782_1.43  | HILIC | neg        | 1.43            | 215.7820   |            |      | 4        |         | 0.76695                                 | 0.90858 | -0.14 | 0.49   | -0.18 | 0.36  | 0.15                  | 0.01  |   | 0.10797 | 0.58695 | -0.36 | 0.02                       | -0.57 | -0.54 | -0.40   | -0.07 | 0.24  |                       |   |   |         |   |   |
| RPneg_215.8475_11.099  | RP    | neg        | 11.099          | 215.8458   |            |      | 4        |         | 0.51769                                 | 0.78885 | 0.24  | 0.03   | 0.15  | 0.81  | 0.62                  | 0.06  |   | 0.37327 | 0.84278 | -0.17 | -0.16                      | 0.05  | -0.66 | -0.15   | 0.09  | 0.10  |                       |   |   |         |   |   |
| RPneg_215.86879_1.033  | RP    | neg        | 1.033           | 215.8688   |            |      | 4        |         | 0.22720                                 | 0.56900 | -0.36 | 0.24   | -0.39 | 0.08  | -0.11                 | 0.67  |   | 0.01931 | 0.29372 | -0.54 | -0.75                      | -0.62 | -0.34 | -0.59   | -0.66 | -0.70 |                       |   |   |         |   |   |
| HILICneg_215.8688_0.39 | HILIC | neg        | 0.39            | 215.8688   |            |      | 4        |         | 0.39042                                 | 0.70156 | -0.19 | -0.34  | -0.16 | 0.01  | 0.61                  | -0.57 |   | 0.23474 | 0.75233 | -0.25 | 0.15                       | -0.33 | -0.18 | -0.73   | -0.02 | 0.81  |                       |   |   |         |   |   |
| HILICneg_215.869_7.4   | HILIC | neg        | 7.4             | 215.8690   |            |      | 4        |         | 0.69362                                 | 0.87420 | -0.15 | 0.28   | 0.39  | 0.09  | -0.10                 | -0.22 |   | 0.07950 | 0.52906 | 0.71  | 0.36                       | 0.88  | 0.42  | 0.53    | -0.06 | 0.10  |                       |   |   |         |   |   |
| HILICneg_215.8861_3.18 | HILIC | neg        | 3.18            | 215.8861   |            |      | 4        |         | 0.76097                                 | 0.90508 | -0.09 | -0.01  | 0.18  | 0.22  | 0.35                  | -0.17 |   | 0.03948 | 0.40503 | 0.61  | 0.36                       | 0.45  | 1.17  | 0.42    | 0.53  | 0.40  |                       |   |   |         |   |   |
| HILICneg_215.9417_5.85 | HILIC | neg        | 5.85            | 215.9417   |            |      | 4        |         | 0.95603                                 | 0.98769 | 0.09  | 0.39   | 0.65  | 0.14  | 0.11                  | -0.60 |   | 0.02081 | 0.30493 | 1.14  | 0.98                       | 0.92  | 1.24  | 1.12    | 1.04  | -0.45 |                       |   |   |         |   |   |
| HILICpos_215.9834_0.38 | HILIC | pos        | 0.38            | 215.9834   |            |      | 4        |         | 0.77429                                 | 0.91097 | 0.11  | 0.41   | -0.10 | 0.21  | 0.65                  | -0.75 |   | 0.27671 | 0.78625 | -0.06 | 0.73                       | 0.00  | 0.07  | -0.54   | -0.09 | 0.05  |                       |   |   |         |   |   |
| HILICpos_215.9841_0.94 | HILIC | pos        | 0.94            | 215.9841   |            |      | 4        |         | 0.76652                                 | 0.90851 | -0.11 | 0.13   | 0.02  | 0.20  | 0.37                  | -0.25 |   | 0.11327 | 0.59660 | -0.23 | -0.46                      | -0.59 | -0.05 | -0.36   | 0.21  | -0.24 |                       |   |   |         |   |   |
| HILICneg_216.025_1.02  | HILIC | neg        | 1.02            | 216.0250   |            |      | 4        |         | 0.00003                                 | 0.00892 | -0.66 | 0.45   | 0.86  | 0.93  | 0.59                  | 0.38  |   | 0.83227 | 0.97501 | 0.00  | -0.39                      | -0.11 | 0.01  | 0.31    | 0.47  | -0.44 |                       |   |   |         |   |   |
| HILICneg_216.0315_4.7  | HILIC | neg        | 4.7             | 216.0315   |            |      | 4        |         | 0.77336                                 | 0.91078 | 0.08  | 0.28   | 0.78  | 0.17  | -0.14                 | -0.51 |   | 0.00223 | 0.09285 | 0.56  | 0.26                       | 0.86  | 1.07  | 0.44    | 0.42  | -0.37 |                       |   |   |         |   |   |
| HILICneg_216.0332_2.23 | HILIC | neg        | 2.23            | 216.0332   |            |      | 4        |         | 0.80136                                 | 0.92335 | -0.10 | -0.06  | 0.40  | 0.25  | -0.20                 | -0.32 |   | 0.34586 | 0.82891 | 0.09  | 0.02                       | 0.09  | 0.23  | 0.12    | 0.07  | -0.14 |                       |   |   |         |   |   |
| HILICneg_216.0562_1.88 | HILIC | neg        | 1.88            | 216.0562   |            |      | 4        |         | 0.72415                                 | 0.88757 | 0.17  | -0.13  | 0.45  | 0.11  | 0.79                  | 0.09  |   | 0.62517 | 0.93394 | 0.25  | -0.18                      | 0.40  | 0.33  | 0.31    | 0.11  | 0.09  |                       |   |   |         |   |   |
| HILICpos_216.0569_6.37 | HILIC | pos        | 6.37            | 216.0569   |            |      | 4        |         | 0.09058                                 | 0.41936 | -0.35 | -0.08  | -0.16 | -0.23 | -0.16                 | -0.79 |   | 0.12764 | 0.61913 | -0.39 | -0.22                      | -0.27 | 0.02  | -0.62   | -0.76 | -0.22 |                       |   |   |         |   |   |
| HILICpos_216.0633_6.47 | HILIC | pos        | 6.47            | 216.0633   |            |      | 4        |         | 0.48485                                 | 0.76743 | -0.13 | -0.04  | 0.52  | -0.18 | -0.01                 | 0.03  |   | 0.96816 | 0.99669 | -0.01 | -0.31                      | 0.01  | 0.53  | 0.32    | 0.13  | -0.36 |                       |   |   |         |   |   |
| HILICpos_216.0977_5.67 | HILIC | pos        | 5.67            | 216.0977   |            |      | 4        |         | 0.25500                                 | 0.59371 | -0.14 | 0.22   | 0.03  | 0.05  | -0.01                 | -0.18 |   | 0.39335 | 0.73704 | -0.07 | 0.18                       | 0.03  | 0.07  | -0.15   | -0.26 | -0.36 |                       |   |   |         |   |   |
| HILICpos_216.0981_5.1  | HILIC | pos        | 5.1             | 216.0981   |            |      | 4        |         | 0.23660                                 | 0.57831 | 0.09  | -0.26  | 0.06  | 0.13  | 0.00                  | 0.80  |   | 0.15119 | 0.65683 | -0.13 | 0.07                       | -0.10 | -0.30 | -0.15   | -0.27 | 0.07  |                       |   |   |         |   |   |
| RPpos_216.1597_10.7    | RP    | pos        | 10.7            | 216.1597   |            |      | 4        |         | 0.00747                                 | 0.16959 | -0.65 | -0.22  | -0.24 | -0.47 | -0.38                 | -0.53 |   | 0.34839 | 0.83042 | 0.39  | 1.12                       | -0.06 | 0.81  | -0.05   | 0.31  | 0.46  |                       |   |   |         |   |   |
| RPpos_216.1959_7.17    | RP    | pos        | 7.17            | 216.1959   |            |      | 4        |         | 0.39618                                 | 0.70586 | -0.22 | 0.24   | -0.03 | -0.26 | -0.22                 | 4.92  |   | 0.91492 | 0.98770 | 0.05  | 1.25                       | -0.20 | 12.73 | 0.07    | 8.24  | -0.40 |                       |   |   |         |   |   |
| RPneg_216.85361_11.544 | RP    | neg        | 11.544          | 216.8536   |            |      | 4        |         | 0.28936                                 | 0.62258 | -0.25 | 0.10   | -0.02 | 0.06  | -0.02                 | 0.15  |   | 0.96465 | 0.99622 | 0.01  | -0.20                      | -0.28 | -0.56 | 0.05    | 0.29  | 0.89  |                       |   |   |         |   |   |
| RPneg_216.85397_11.099 | RP    | neg        | 11.099          | 216.8540   |            |      | 4        |         | 0.26434                                 | 0.60127 | 0.45  | -0.07  | 0.28  | 0.53  | 1.88                  | 0.22  |   | 0.60336 | 0.92875 | -0.15 | -0.19                      | -0.18 | -0.35 | -0.28   | 0.08  | 0.25  |                       |   |   |         |   |   |
| RPneg_216.85432_10.84  | RP    | neg        | 10.84           | 216.8543   |            |      | 4        |         | 0.01489                                 | 0.22933 | -0.50 | -0.19  | 0.03  | -0.35 | -0.41                 | -0.33 |   | 0.80874 | 0.97091 | -0.01 | 0.52                       | -0.06 | 0.19  | 0.92    | -0.70 | -0.59 |                       |   |   |         |   |   |
| HILICneg_216.8775_0.93 | HILIC | neg        | 0.93            | 216.8775   |            |      | 4        |         | 0.12882                                 | 0.46512 | -0.29 | -0.25  | -0.21 | -0.04 | -0.29                 | -0.11 |   | 0.23333 | 0.75066 | -0.26 | -0.37                      | -0.23 | -0.33 | -0.12   | -0.25 | 0.12  |                       |   |   |         |   |   |
| RPneg_216.87985_14.173 | RP    | neg        | 14.173          | 216.8799   |            |      | 4        |         | 0.24437                                 | 0.58521 | -0.29 | 0.19   | -0.30 | -0.26 | -0.04                 | 0.38  |   | 0.02680 | 0.34431 | -0.23 | -0.44                      | -0.21 | -0.37 | -0.04   | -0.32 | 0.34  |                       |   |   |         |   |   |
| RPneg_216.9097_7.73    | RP    | neg        | 7.73            | 216.9097   |            |      | 4        |         | 0.29819                                 | 0.62838 | -0.34 | 0.18   | 0.06  | 0.06  | 0.07                  | -0.10 |   | 0.08218 | 0.53444 | -0.36 | -0.21                      | -0.36 | -0.28 | -0.50   | -0.56 | -0.33 |                       |   |   |         |   |   |
| HILICneg_216.9552_1.43 | HILIC | neg        | 1.43            | 216.9552   |            |      | 4        |         | 0.59207                                 | 0.82490 | -0.17 | -0.05  | 0.42  | -0.38 | -0.08                 | 0.53  |   | 0.27584 | 0.78622 | 0.50  |                            |       |       |         |       |       |                       |   |   |         |   |   |



| Feature_ID             | Mode  | Ionization | Average_Rt.min. | Average_Mz | Metabolite | MSMS | ID_Level | HMDB_ID | IV-Alcohol self-administration (IV-ASA) |       |       |        |       |                       |       |          |         |       | IV-Alcohol clamp (IV-AC)   |       |       |       |       |                       |   |        |   |  |
|------------------------|-------|------------|-----------------|------------|------------|------|----------|---------|-----------------------------------------|-------|-------|--------|-------|-----------------------|-------|----------|---------|-------|----------------------------|-------|-------|-------|-------|-----------------------|---|--------|---|--|
|                        |       |            |                 |            |            |      |          |         | Area Under the Curve (AUC)              |       |       |        |       | IV-Ghrelin or Placebo |       |          |         |       | Area Under the Curve (AUC) |       |       |       |       | IV-Ghrelin or Placebo |   |        |   |  |
|                        |       |            |                 |            |            |      |          |         | Baseline                                |       |       | IV-ASA |       | BrAC=0                |       | Baseline |         |       | Post-LD                    |       | IV-AC |       |       | Post-AC               |   | BrAC=0 |   |  |
|                        |       |            |                 |            |            |      |          |         | p                                       | q     | d     | d      | d     | d                     | d     | d        | d       | p     | q                          | d     | d     | d     | d     | d                     | d | d      | d |  |
| HILICneg_218.0475_6.21 | HILIC | neg        | 6.21            | 218.0475   |            | 4    |          | 0.89456 | 0.96179                                 | -0.01 | -0.14 | 0.29   | 0.04  | 0.02                  | -0.60 | 0.12931  | 0.62281 | 0.57  | 0.30                       | 0.75  | 1.09  | 0.27  | 0.23  | 0.22                  |   |        |   |  |
| RPneg_218.04929_1.899  | RP    | neg        | 1.899           | 218.0493   |            | 4    |          | 0.30214 | 0.63148                                 | -0.18 | -0.12 | -0.17  | -0.18 | -0.18                 | -0.21 | 0.21588  | 0.73213 | 0.43  | 0.48                       | 0.49  | 0.47  | 0.43  | 0.38  | 0.05                  |   |        |   |  |
| RPneg_218.08272_6.17   | RP    | neg        | 6.17            | 218.0827   |            | 4    |          | 0.06316 | 0.37122                                 | 0.03  | -0.18 | 0.03   | 0.04  | 0.22                  | -0.45 | 0.50908  | 0.90412 | -0.11 | -0.01                      | -0.08 | -0.05 | -0.04 | -0.14 | -0.25                 |   |        |   |  |
| RPneg_218.10342_1.98   | RP    | neg        | 1.98            | 218.1034   |            | 4    |          | 0.89499 | 0.96183                                 | -0.03 | -0.14 | 0.21   | 0.06  | 0.20                  | -0.26 | 0.81273  | 0.97170 | 0.32  | 0.23                       | 0.21  | 0.48  | 0.42  | 0.11  | 0.37                  |   |        |   |  |
| HILICpos_218.1246_6.12 | HILIC | pos        | 6.12            | 218.1246   |            | 4    |          | 0.57857 | 0.86550                                 | 0.09  | 0.01  | 0.32   | 0.19  | 0.38                  | -0.52 | 0.74573  | 0.96070 | 0.15  | 0.17                       | 0.29  | 0.30  | 0.26  | -0.18 | -0.44                 |   |        |   |  |
| HILICpos_218.1284_5.54 | HILIC | pos        | 5.54            | 218.1284   |            | 4    |          | 0.48016 | 0.78424                                 | 0.01  | 0.03  | 0.09   | 0.01  | 0.01                  | -0.53 | 0.43654  | 0.87671 | -0.21 | -0.27                      | -0.25 | -0.23 | -0.48 | -0.14 | -0.27                 |   |        |   |  |
| RPneg_218.13144_7.969  | RP    | neg        | 7.969           | 218.1314   |            | 4    |          | 0.74489 | 0.89848                                 | -0.13 | -0.02 | -0.10  | 0.37  | -0.13                 | -0.38 | 0.35123  | 0.83176 | -0.12 | -0.18                      | -0.02 | -0.11 | -0.03 | -0.30 | -0.12                 |   |        |   |  |
| RPpos_218.1388_1.41    | RP    | pos        | 1.41            | 218.1388   |            | 4    |          | 0.16749 | 0.51280                                 | 0.41  | 0.42  | 0.81   | 0.71  | 0.34                  | 0.39  | 0.74311  | 0.96033 | 0.04  | -0.04                      | 0.01  | -0.38 | 0.12  | 0.20  | -0.34                 |   |        |   |  |
| HILICpos_218.1496_4.55 | HILIC | pos        | 4.55            | 218.1496   |            | 4    |          | 0.74468 | 0.89829                                 | -0.08 | 0.05  | -0.01  | -0.08 | -0.05                 | -0.51 | 0.82875  | 0.97436 | -0.02 | -0.03                      | 0.02  | -0.02 | 0.00  | -0.04 | -0.08                 |   |        |   |  |
| HILICneg_218.8172_3.18 | HILIC | neg        | 3.18            | 218.8172   |            | 4    |          | 0.16619 | 0.51153                                 | -0.38 | -0.09 | -0.42  | 0.08  | 0.25                  | -0.72 | 0.65886  | 0.94171 | 0.08  | 0.12                       | -0.04 | 0.09  | -0.08 | 0.11  | 0.40                  |   |        |   |  |
| HILICneg_218.8174_0.52 | HILIC | neg        | 0.52            | 218.8174   |            | 4    |          | 0.81997 | 0.93151                                 | -0.14 | -0.19 | 0.12   | 0.09  | -0.20                 | 0.18  | 0.71321  | 0.95354 | 0.47  | 0.20                       | 0.02  | 0.66  | 0.31  | 0.64  | 0.47                  |   |        |   |  |
| HILICneg_218.8176_0.6  | HILIC | neg        | 0.6             | 218.8176   |            | 4    |          | 0.24682 | 0.58731                                 | -0.14 | -0.18 | 0.05   | -0.14 | 0.19                  | -0.36 | 0.18648  | 0.70221 | 0.58  | -0.12                      | 0.44  | 1.34  | 1.03  | 0.13  | -0.20                 |   |        |   |  |
| HILICneg_218.9633_4.93 | HILIC | neg        | 4.93            | 218.9633   |            | 4    |          | 0.34900 | 0.66960                                 | -0.23 | 0.12  | 0.00   | 0.17  | 0.07                  | -0.68 | 0.20075  | 0.71669 | 0.25  | 0.18                       | 0.29  | 0.34  | -0.10 | 0.51  | 0.10                  |   |        |   |  |
| HILICneg_218.9635_0.96 | HILIC | neg        | 0.96            | 218.9635   |            | 4    |          | 0.93339 | 0.97624                                 | -0.05 | 0.28  | 0.13   | 0.06  | 0.28                  | 0.06  | 0.53108  | 0.91243 | -0.07 | 0.05                       | -0.20 | 0.10  | -0.15 | -0.14 | -0.02                 |   |        |   |  |
| HILICneg_218.9639_5.42 | HILIC | neg        | 5.42            | 218.9639   |            | 4    |          | 0.00008 | 0.01680                                 | -0.66 | -0.36 | -0.78  | -0.42 | -0.08                 | 0.36  | 0.49781  | 0.90072 | -0.35 | 0.34                       | -0.23 | 0.36  | -1.25 | -0.11 | 0.96                  |   |        |   |  |
| HILICpos_218.9935_0.94 | HILIC | pos        | 0.94            | 218.9935   |            | 4    |          | 0.60428 | 0.83141                                 | 0.08  | 0.22  | 0.23   | 0.33  | 0.30                  | -0.26 | 0.00723  | 0.17915 | -0.39 | -0.50                      | -0.52 | -0.31 | -0.22 | -0.38 | -0.54                 |   |        |   |  |
| RPpos_218.9946_2.86    | RP    | pos        | 2.86            | 218.9946   |            | 4    |          | 0.76395 | 0.90688                                 | 0.04  | 0.07  | 0.22   | 0.20  | 0.10                  | -0.19 | 0.12973  | 0.62317 | 1.26  | 1.24                       | 1.19  | 0.97  | 1.60  | 1.49  | 0.40                  |   |        |   |  |
| HILICneg_218.9948_6.17 | HILIC | neg        | 6.17            | 218.9948   |            | 4    |          | 0.48377 | 0.76674                                 | -0.26 | 0.14  | 0.29   | 0.08  | -0.05                 | -0.25 | 0.02651  | 0.34844 | 0.23  | 0.34                       | 0.19  | 0.50  | 0.08  | 0.55  | -0.12                 |   |        |   |  |
| RPneg_218.99677_2.697  | RP    | neg        | 2.697           | 218.9968   |            | 4    |          | 0.33559 | 0.69817                                 | 0.20  | 0.45  | 0.42   | 0.14  | 0.25                  | 0.86  | 0.20327  | 0.71948 | -0.37 | -0.20                      | -0.29 | -0.38 | -0.25 | -0.33 | -0.02                 |   |        |   |  |
| RPneg_218.99681_2.901  | RP    | neg        | 2.901           | 218.9968   |            | 4    |          | 0.25453 | 0.59310                                 | 0.69  | 1.08  | 1.57   | 0.59  | 0.86                  | 0.54  | 0.19150  | 0.70700 | 0.18  | 0.41                       | 0.50  | 0.13  | 0.23  | 0.04  | -0.01                 |   |        |   |  |
| RPneg_218.99689_1.494  | RP    | neg        | 1.494           | 218.9969   |            | 4    |          | 0.24495 | 0.58610                                 | 0.22  | 0.09  | 1.31   | 0.40  | -0.08                 | -0.36 | 0.07202  | 0.51232 | 0.37  | -0.08                      | 0.05  | 0.46  | 0.62  | 0.50  | 0.61                  |   |        |   |  |
| RPneg_218.99695_1.692  | RP    | neg        | 1.692           | 218.9970   |            | 4    |          | 0.57022 | 0.81414                                 | 0.15  | 0.09  | 0.92   | 0.41  | 0.06                  | -0.23 | 0.15539  | 0.66179 | 0.29  | -0.06                      | -0.16 | 0.24  | 0.38  | 0.53  | 0.29                  |   |        |   |  |
| RPneg_218.99704_2.566  | RP    | neg        | 2.566           | 218.9970   |            | 4    |          | 0.08312 | 0.40801                                 | 0.71  | 0.49  | 0.79   | 0.70  | 0.96                  | 0.76  | 0.56509  | 0.92071 | -0.17 | -0.05                      | -0.20 | -0.21 | -0.17 | -0.17 | -0.10                 |   |        |   |  |
| HILICneg_218.9974_0.44 | HILIC | neg        | 0.44            | 218.9974   |            | 4    |          | 0.13803 | 0.47769                                 | 0.62  | 0.60  | 0.73   | 0.71  | 0.79                  | 0.32  | 0.79319  | 0.96755 | -0.09 | 0.08                       | -0.06 | -0.16 | -0.10 | -0.14 | -0.02                 |   |        |   |  |
| RPneg_219.00906_1.596  | RP    | neg        | 1.596           | 219.0091   |            | 4    |          | 0.76679 | 0.90857                                 | 0.06  | 0.13  | 0.09   | 0.20  | 0.40                  | 0.13  | 0.11711  | 0.60178 | 0.34  | -0.02                      | -0.19 | 0.45  | 0.45  | 0.56  | 0.76                  |   |        |   |  |
| RPneg_219.00934_1.359  | RP    | neg        | 1.359           | 219.0093   |            | 4    |          | 0.28199 | 0.61603                                 | 0.28  | 0.02  | 0.22   | 0.32  | 1.07                  | -0.08 | 0.70767  | 0.95262 | 0.19  | -0.11                      | -0.16 | 0.84  | -0.20 | -0.24 | 0.44                  |   |        |   |  |
| HILICpos_219.0266_5.2  | HILIC | pos        | 5.2             | 219.0266   |            | 4    |          | 0.52807 | 0.79225                                 | 0.23  | -0.23 | 0.80   | -0.02 | 0.34                  | 0.95  | 0.07886  | 0.52748 | 0.67  | -0.13                      | 0.59  | 0.74  | 0.17  | -0.54 | 1.49                  |   |        |   |  |
| HILICneg_219.0458_4.94 | HILIC | neg        | 4.94            | 219.0458   |            | 4    |          | 0.94277 | 0.97907                                 | -0.05 | -0.09 | 0.00   | 0.13  | 0.04                  | -0.68 | 0.69225  | 0.95008 | -0.13 | -0.13                      | -0.10 | -0.02 | -0.10 | -0.17 | -0.56                 |   |        |   |  |
| RPneg_219.06624_6.557  | RP    | neg        | 6.557           | 219.0662   |            | 4    |          | 0.46620 | 0.75489                                 | -0.14 | -0.03 | 0.17   | -0.12 | -0.13                 | -0.16 | 0.92409  | 0.98905 | 0.01  | 0.15                       | -0.04 | 0.05  | 0.17  | 0.01  | -0.06                 |   |        |   |  |
| HILICneg_219.0682_1.81 | HILIC | neg        | 1.81            | 219.0682   |            | 4    |          | 0.70476 | 0.87943                                 | 0.16  | 0.14  | 0.67   | 0.35  | 0.68                  | -0.02 | 0.96204  | 0.99564 | 0.01  | -0.09                      | 0.05  | 0.15  | 0.03  | 0.02  | -0.22                 |   |        |   |  |
| RPneg_219.07791_1.625  | RP    | neg        | 1.625           | 219.0779   |            | 4    |          | 0.69790 | 0.87637                                 | -0.07 | -0.04 | 0.33   | 0.01  | -0.04                 | -0.41 | 0.73943  | 0.95927 | 1.35  | 1.90                       | 2.05  | 1.41  | 1.46  | 0.51  | 0.76                  |   |        |   |  |
| HILICpos_219.0974_6.66 | HILIC | pos        | 6.66            | 219.0974   |            | 4    |          | 0.32480 | 0.65067                                 | 0.17  | 0.30  | 0.54   | 0.13  | 0.22                  | 0.14  | 0.02699  | 0.34456 | 0.35  | 0.28                       | 0.18  | 0.46  | 0.59  | 0.29  | -0.07                 |   |        |   |  |
| HILICneg_219.1103_6.98 | HILIC | neg        | 6.98            | 219.1103   |            | 4    |          | 0.75566 | 0.90297                                 | -0.13 | 0.08  | 0.56   | 0.03  | -0.25                 | -0.80 | 0.43149  | 0.87439 | 0.44  | 0.20                       | 0.44  | 0.17  | -0.44 | -0.35 | -0.27                 |   |        |   |  |
| RPneg_219.12363_5.198  | RP    | neg        | 5.198           | 219.1236   |            | 4    |          | 0.39300 | 0.70336                                 | 0.25  | 0.03  | 0.85   | 0.59  | -0.11                 | -0.59 | 0.00021  | 0.02037 | 0.74  | 0.46                       | 0.77  | 0.91  | 0.97  | 0.68  | 0.43                  |   |        |   |  |
| HILICpos_219.1452_4.55 | HILIC | pos        | 4.55            | 219.1452   |            | 4    |          | 0.85304 | 0.94495                                 | -0.08 | 0.06  | 0.02   | -0.05 | -0.07                 | -0.49 | 0.98021  | 0.99752 | -0.02 | -0.01                      | -0.01 | 0.00  | 0.00  | 0.03  | -0.10                 |   |        |   |  |
| HILICpos_219.1592_0.41 | HILIC | pos        | 0.41            | 219.1592   |            | 4    |          | 0.71989 | 0.88590                                 | 0.10  | 0.33  | 0.53   | 0.13  | 0.21                  | -0.20 | 0.74191  | 0.95997 | -0.14 | -0.23                      | 0.11  | -0.29 | 0.13  | -0.29 | 0.59                  |   |        |   |  |
| RPpos_219.1743_11.56   | RP    | pos        | 11.56           | 219.1743   |            | 4    |          | 0.74118 | 0.89626                                 | -0.09 | 0.31  | -0.17  | 0.60  | -0.05                 | 0.42  | 0.86050  | 0.97967 | -0.02 | -0.27                      | 0.00  | 0.06  | 0.36  | -0.30 | -0.46                 |   |        |   |  |
| RPpos_219.1954_8.86    | RP    | pos        | 8.86            | 219.1954   |            | 4    |          | 0.26465 | 0.60141                                 | 0.37  | 0.17  | 0.06   | 0.51  | 1.22                  | 0.32  | 0.49945  | 0.90107 | 0.30  | 0.42                       | 0.64  | 0.76  | 0.40  | -0.11 | -0.14                 |   |        |   |  |
| HILICneg_219.8456_3.35 | HILIC | neg        | 3.35            | 219.8456   |            | 4    |          | 0.10569 | 0.43876                                 | -0.67 | -0.24 | -0.35  | -0.03 | -0.35                 | -1.13 | 0.31189  | 0.80947 | 0.05  | 0.37                       | 0.03  | 0.33  | 0.14  | 0.23  | 0.15                  |   |        |   |  |
| HILICneg_219.8457_4.88 | HILIC | neg        | 4.88            | 219.8457   |            | 4    |          | 0.49982 | 0.77606                                 | -0.08 | 0.51  | 0.43   | -0.22 | -0.02                 | 0.93  | 0.12620  | 0.61763 | -0.34 | -0.08                      | -0.77 | -0.11 | -0.04 | -0.74 | -0.61                 |   |        |   |  |
| RPpos_219.9662_1.1     | RP    | pos        | 1.1             | 219.9662   |            | 4    |          | 0.78089 | 0.91422                                 | 0.19  | 0.02  | 0.13   | 0.11  | 0.98                  | 0.08  | 0.88035  | 0.98273 | -0.12 | -0.20                      | -0.36 | 0.02  | 0.20  | 0.25  | -0.14                 |   |        |   |  |
| HILICneg_219.9784_6.41 | HILIC | neg        | 6.41            | 219.9784   |            | 4    |          | 0.06233 | 0.36949                                 | -0.47 | -0.32 | -0.06  | -0.33 | -0.69                 | -0.07 | 0.02281  | 0.31841 | -0.56 | -0.76                      | -0.84 | -0.12 | -0.52 | -0.72 | -0.02                 |   |        |   |  |
| HILICneg_219.9846_4.37 | HILIC | neg        | 4.37            | 219.9846   |            | 4    |          | 0.07448 | 0.39314                                 | -0.41 | 0.01  | -0.15  | 0.01  | 0.29                  | -0.34 | 0.69626  | 0.95088 | 0.07  | 0.31                       | -0.08 | 0.52  | -0.31 | 0.22  | 0.17                  |   |        |   |  |
| HILICpos_219.9891_0.94 | HILIC | pos        | 0.94            | 219.9891   |            | 4    |          | 0.62849 | 0.84270                                 | 0.07  | 0.11  | 0.24   | 0.24  | 0.27                  | -0.34 | 0.01051  | 0.21785 | -0.39 | -0.43                      | -0.46 | -0.38 | -0.29 | -0.36 | -0.54                 |   |        |   |  |
| HILICpos_219.9902_4.84 | HILIC | pos        | 4.84            | 219.9902   |            | 4    |          | 0.67153 | 0.86328                                 |       |       |        |       |                       |       |          |         |       |                            |       |       |       |       |                       |   |        |   |  |

| Feature_ID             | Mode  | Ionization | Average_Rt.min. | Average_Mz | Metabolite | MSMS | ID_Level | HMDB_ID | IV-Alcohol self-administration (IV-ASA) |       |        |       |       |                       |       |                       |         |       | IV-Alcohol clamp (IV-AC)   |       |        |       |       |                       |   |                       |   |   |
|------------------------|-------|------------|-----------------|------------|------------|------|----------|---------|-----------------------------------------|-------|--------|-------|-------|-----------------------|-------|-----------------------|---------|-------|----------------------------|-------|--------|-------|-------|-----------------------|---|-----------------------|---|---|
|                        |       |            |                 |            |            |      |          |         | Area Under the Curve (AUC)              |       |        |       |       | IV-Ghrelin or Placebo |       |                       |         |       | Area Under the Curve (AUC) |       |        |       |       | IV-Ghrelin or Placebo |   |                       |   |   |
|                        |       |            |                 |            |            |      |          |         | Baseline                                |       | IV-ASA |       |       | Baseline              |       | IV-Ghrelin or Placebo |         |       | Baseline                   |       | IV-ASA |       |       | Baseline              |   | IV-Ghrelin or Placebo |   |   |
|                        |       |            |                 |            |            |      |          |         | p                                       | q     | d      | d     | d     | d                     | d     | d                     | d       | d     | p                          | q     | d      | d     | d     | d                     | d | d                     | d | d |
| RPpos_221.0923_2.83    | RP    | pos        | 2.83            |            |            | 4    |          | 0.09494 | 0.42429                                 | -0.30 | 0.14   | 0.58  | -0.08 | -0.74                 | -0.73 | 0.88777               | 0.98367 | -0.03 | -0.08                      | 0.35  | 0.16   | -0.11 | -0.26 | -0.33                 |   |                       |   |   |
| RPneg_221.09312_2.241  | RP    | neg        | 2.241           |            |            | 4    |          | 0.19334 | 0.53883                                 | -0.19 | -0.06  | -0.10 | -0.07 | -0.26                 | 0.20  | 0.79888               | 0.96921 | -0.04 | -0.15                      | -0.08 | -0.12  | 0.19  | -0.06 | 0.12                  |   |                       |   |   |
| RPneg_221.09334_2.739  | RP    | neg        | 2.739           |            |            | 4    |          | 0.22523 | 0.56723                                 | -0.20 | -0.06  | -0.09 | -0.08 | -0.32                 | 0.36  | 0.79676               | 0.96859 | -0.04 | -0.09                      | -0.08 | -0.13  | 0.15  | -0.05 | 0.15                  |   |                       |   |   |
| HILICneg_221.0934_5.2  | HILIC | neg        | 5.2             |            |            | 4    |          | 0.80887 | 0.92675                                 | -0.08 | -0.12  | 0.04  | 0.05  | -0.19                 | 0.58  | 0.17875               | 0.69392 | 0.04  | -0.09                      | -0.02 | 0.00   | 0.24  | -0.01 | 0.25                  |   |                       |   |   |
| HILICpos_221.0954_5.05 | HILIC | pos        | 5.05            |            |            | 4    |          | 0.57967 | 0.91821                                 | -0.02 | -0.18  | 0.24  | -0.09 | -0.44                 | 0.44  | 0.13484               | 0.63121 | -0.19 | -0.34                      | -0.20 | 0.00   | -0.28 | -0.28 | -0.25                 |   |                       |   |   |
| RPpos_221.1173_8.39    | RP    | pos        | 8.39            |            |            | 4    |          | 0.55372 | 0.79472                                 | 0.22  | 0.2    | -0.14 | 0.14  | 0.94                  | 0.43  | 0.24200               | 0.51    | 0.15  | 0.09                       | 0.27  | 0.21   | 0.23  | 0.01  | 0.03                  |   |                       |   |   |
| RPneg_221.11882_9.746  | RP    | neg        | 9.746           |            |            | 4    |          | 0.34128 | 0.66357                                 | 0.24  | 0.33   | 0.04  | -0.05 | 0.80                  | 1.01  | 0.25493               | 0.76998 | 0.66  | 0.58                       | 0.16  | 1.94   | 1.35  | 0.59  | -0.09                 |   |                       |   |   |
| HILICpos_221.1384_0.42 | HILIC | pos        | 0.42            |            |            | 4    |          | 0.78689 | 0.91638                                 | 0.08  | 0.43   | 0.47  | 0.06  | 0.23                  | 0.12  | 0.52413               | 0.90948 | -0.25 | -0.19                      | 0.10  | -0.26  | -0.16 | -0.51 | 0.59                  |   |                       |   |   |
| RPpos_221.1538_1.05    | RP    | pos        | 1.05            |            |            | 4    |          | 0.24503 | 0.58613                                 | 0.35  | 0.13   | 1.06  | -0.05 | 0.54                  | -0.06 | 0.19136               | 0.70671 | -0.50 | -0.27                      | -0.72 | 0.88   | -0.13 | -0.47 | -0.28                 |   |                       |   |   |
| RPpos_221.1747_11.07   | RP    | pos        | 11.07           |            |            | 4    |          | 0.10767 | 0.44127                                 | -0.55 | -0.17  | -0.10 | -0.25 | -0.46                 | -0.43 | 0.53256               | 0.91290 | 0.26  | 1.26                       | -0.33 | 0.57   | -0.07 | 0.20  | 0.70                  |   |                       |   |   |
| HILICpos_221.1857_3.6  | HILIC | pos        | 3.6             |            |            | 4    |          | 0.33379 | 0.65753                                 | -0.21 | -0.42  | 0.24  | -0.30 | 0.21                  | -0.47 | 0.00101               | 0.05759 | 0.41  | 0.31                       | 0.34  | 0.61   | 0.04  | 0.45  | 0.30                  |   |                       |   |   |
| HILICneg_221.8429_4.88 | HILIC | neg        | 4.88            |            |            | 4    |          | 0.87105 | 0.95154                                 | 0.06  | 0.52   | 0.49  | 0.01  | 0.17                  | 0.53  | 0.16997               | 0.68215 | -0.32 | 0.03                       | -0.56 | -0.07  | -0.02 | -0.67 | -0.63                 |   |                       |   |   |
| HILICneg_221.875_0.92  | HILIC | neg        | 0.92            |            |            | 4    |          | 0.05795 | 0.36240                                 | -0.34 | -0.33  | -0.24 | -0.26 | -0.35                 | -0.17 | 0.03701               | 0.39245 | -0.42 | -0.39                      | -0.43 | -0.46  | -0.36 | -0.35 | -0.28                 |   |                       |   |   |
| RPpos_221.982_1.05     | RP    | pos        | 1.05            |            |            | 4    |          | 0.50437 | 0.77898                                 | 0.19  | 0.10   | 0.29  | 0.47  | 0.43                  | -0.04 | 0.30952               | 0.80799 | 0.32  | 0.21                       | -0.01 | 0.55   | 0.03  | 0.37  | 0.81                  |   |                       |   |   |
| RPpos_221.9821_1.37    | RP    | pos        | 1.37            |            |            | 4    |          | 0.17297 | 0.51845                                 | 0.38  | 0.01   | 0.05  | 0.46  | 1.25                  | 0.23  | 0.46852               | 0.88898 | 0.52  | -0.03                      | 0.44  | 1.14   | 0.07  | -0.39 | 0.57                  |   |                       |   |   |
| HILICneg_222.0233_0.79 | HILIC | neg        | 0.79            |            |            | 4    |          | 0.20279 | 0.54737                                 | 0.32  | 0.19   | 0.96  | 0.18  | 0.19                  | -0.38 | 0.09019               | 0.55371 | 0.17  | 0.28                       | 0.36  | 0.25   | 0.16  | 0.21  | -0.46                 |   |                       |   |   |
| HILICpos_222.0525_0.49 | HILIC | pos        | 0.49            |            |            | 4    |          | 0.59293 | 0.82538                                 | -0.21 | 0.00   | -0.02 | 0.01  | -0.10                 | -0.24 | 0.85943               | 0.97939 | 0.00  | 0.25                       | -0.27 | -0.21  | 0.22  | -0.09 | 0.29                  |   |                       |   |   |
| HILICneg_222.0619_6.22 | HILIC | neg        | 6.22            |            |            | 4    |          | 0.78900 | 0.91746                                 | -0.03 | -0.09  | 0.25  | 0.05  | -0.11                 | -0.31 | 0.09252               | 0.55918 | 0.52  | 0.30                       | 0.51  | 0.97   | 0.50  | 0.17  | -0.17                 |   |                       |   |   |
| RPneg_222.07712_3.068  | RP    | neg        | 3.068           |            |            | 4    |          | 0.21282 | 0.55338                                 | 0.45  | 0.62   | 1.33  | 0.85  | 0.05                  | 0.23  | 0.51830               | 0.90830 | 0.22  | 0.03                       | -0.09 | 0.50   | 0.26  | 0.31  | -0.29                 |   |                       |   |   |
| HILICneg_222.1136_0.62 | HILIC | neg        | 0.62            |            |            | 4    |          | 0.58776 | 0.82288                                 | -0.07 | 0.02   | 0.05  | -0.08 | 0.12                  | -0.18 | 0.00002               | 0.00383 | 0.83  | 0.63                       | 0.71  | 0.84   | 1.06  | 1.00  | 0.54                  |   |                       |   |   |
| RPneg_222.11365_7.016  | RP    | neg        | 7.016           |            |            | 4    |          | 0.55986 | 0.80922                                 | -0.07 | 0.00   | 0.09  | 0.09  | 0.09                  | -0.20 | 0.00003               | 0.00505 | 0.82  | 0.55                       | 0.72  | 0.79   | 1.01  | 0.95  | 0.90                  |   |                       |   |   |
| RPpos_222.1464_6.41    | RP    | pos        | 6.41            |            |            | 4    |          | 0.01273 | 0.21598                                 | -0.56 | -0.19  | -0.30 | -0.29 | -0.09                 | -0.66 | 0.21417               | 0.73084 | 0.20  | 0.58                       | 0.21  | 0.30   | 0.22  | 0.03  | -0.03                 |   |                       |   |   |
| HILICneg_222.7653_1.47 | HILIC | neg        | 1.47            |            |            | 4    |          | 0.42440 | 0.72607                                 | -0.25 | -0.02  | -0.07 | 0.29  | 0.03                  | -0.79 | 0.31048               | 0.80865 | -0.24 | 0.46                       | -0.06 | -0.23  | -0.30 | -0.65 | -0.01                 |   |                       |   |   |
| HILICneg_222.8113_0.54 | HILIC | neg        | 0.54            |            |            | 4    |          | 0.07501 | 0.39395                                 | -0.40 | -0.29  | -0.10 | -0.52 | -0.19                 | -0.14 | 0.24107               | 0.75800 | 0.93  | 0.67                       | 0.54  | 0.98   | 0.90  | 0.63  | 0.41                  |   |                       |   |   |
| HILICneg_222.8117_3.74 | HILIC | neg        | 3.74            |            |            | 4    |          | 0.61844 | 0.83790                                 | -0.13 | 0.66   | -0.10 | -0.53 | 0.61                  | -0.19 | 0.80114               | 0.96981 | 0.02  | 0.05                       | 0.19  | -0.27  | 0.01  | 0.23  | -0.08                 |   |                       |   |   |
| HILICneg_222.8304_0.93 | HILIC | neg        | 0.93            |            |            | 4    |          | 0.03113 | 0.29684                                 | -0.30 | -0.10  | -0.14 | -0.29 | -0.21                 | -0.03 | 0.10263               | 0.57706 | -0.31 | -0.35                      | -0.16 | -0.30  | -0.26 | -0.31 | -0.32                 |   |                       |   |   |
| RPneg_222.9371_11.193  | RP    | neg        | 11.193          |            |            | 4    |          | 0.01896 | 0.25058                                 | 1.23  | 0.01   | 0.67  | 1.78  | 1.91                  | -0.42 | 0.28930               | 0.79448 | -0.31 | -0.02                      | 0.51  | -0.74  | -0.11 | -0.36 | -0.32                 |   |                       |   |   |
| RPneg_222.93727_10.207 | RP    | neg        | 10.207          |            |            | 4    |          | 0.24169 | 0.58221                                 | -0.32 | -0.01  | 0.29  | 0.14  | -0.25                 | -0.14 | 0.58425               | 0.92465 | -0.26 | 0.04                       | 0.12  | 0.20   | -0.43 | 0.40  | 0.22                  |   |                       |   |   |
| RPneg_222.93819_6.581  | RP    | neg        | 6.581           |            |            | 4    |          | 0.51855 | 0.78727                                 | -0.06 | 0.10   | 0.10  | -0.04 | 0.21                  | 0.19  | 0.10772               | 0.58650 | -0.03 | -0.02                      | 0.03  | -0.08  | 0.03  | -0.03 | -0.08                 |   |                       |   |   |
| HILICneg_222.939_0.41  | HILIC | neg        | 0.41            |            |            | 4    |          | 0.92589 | 0.97327                                 | -0.02 | 0.17   | 0.13  | -0.05 | 0.26                  | 0.25  | 0.06324               | 0.48810 | -0.07 | -0.05                      | 0.09  | -0.16  | -0.03 | -0.10 | -0.15                 |   |                       |   |   |
| HILICneg_222.9687_5.85 | HILIC | neg        | 5.85            |            |            | 4    |          | 0.85717 | 0.94640                                 | 0.00  | 0.17   | 0.63  | 0.33  | 0.00                  | -0.68 | 0.01304               | 0.24442 | 1.13  | 0.82                       | 1.09  | 1.52   | 1.07  | 0.84  | -0.14                 |   |                       |   |   |
| HILICpos_222.988_0.94  | HILIC | pos        | 0.94            |            |            | 4    |          | 0.62526 | 0.84103                                 | 0.07  | -0.06  | 0.00  | 0.43  | 0.44                  | -0.20 | 0.05837               | 0.47519 | -0.33 | -0.18                      | -0.59 | -0.27  | -0.35 | 0.04  | -0.71                 |   |                       |   |   |
| RPpos_222.9902_1.6     | RP    | pos        | 1.6             |            |            | 4    |          | 0.27178 | 0.81509                                 | 0.12  | 0.27   | 0.21  | 0.14  | 0.35                  | 0.16  | 0.02621               | 0.34163 | 0.73  | 0.14                       | 0.51  | 0.76   | 0.95  | 0.76  | 0.62                  |   |                       |   |   |
| HILICneg_222.9918_0.99 | HILIC | neg        | 0.99            |            |            | 4    |          | 0.26329 | 0.60049                                 | 0.35  | 0.37   | 0.54  | 0.38  | 0.56                  | 0.04  | 0.62955               | 0.93523 | 0.12  | 0.01                       | 0.12  | 0.26   | 0.25  | 0.27  | -0.27                 |   |                       |   |   |
| RPneg_222.99196_1.05   | RP    | neg        | 1.05            |            |            | 4    |          | 0.54715 | 0.80218                                 | 0.12  | 0.18   | 0.35  | 0.18  | 0.11                  | -0.01 | 0.74471               | 0.96700 | -0.07 | -0.09                      | -0.05 | -0.09  | 0.08  | -0.08 | -0.24                 |   |                       |   |   |
| HILICneg_222.9923_1.24 | HILIC | neg        | 1.24            |            |            | 4    |          | 0.29491 | 0.62651                                 | 0.20  | 0.26   | 0.33  | 0.29  | 0.21                  | 0.13  | 0.86929               | 0.98042 | -0.07 | -0.15                      | -0.08 | -0.03  | 0.07  | 0.00  | -0.31                 |   |                       |   |   |
| HILICneg_222.9923_0.67 | HILIC | neg        | 0.67            |            |            | 4    |          | 0.91880 | 0.97039                                 | -0.02 | 0.15   | 0.62  | 0.39  | -0.13                 | -0.22 | 0.04853               | 0.43985 | 0.45  | 0.40                       | 0.62  | 1.04   | 0.90  | 0.63  | -0.18                 |   |                       |   |   |
| RPneg_223.00725_5.2    | RP    | neg        | 5.2             |            |            | 4    |          | 0.50066 | 0.77659                                 | -0.09 | -0.09  | -0.04 | -0.13 | -0.04                 | 0.25  | 0.64762               | 0.93902 | -0.04 | -0.05                      | -0.03 | -0.05  | -0.03 | -0.02 | -0.06                 |   |                       |   |   |
| RPneg_223.0074_5.105   | RP    | neg        | 5.105           |            |            | 4    |          | 0.95324 | 0.98292                                 | 0.01  | -0.02  | 0.02  | -0.04 | 0.03                  | 0.42  | 0.94005               | 0.99109 | -0.07 | -0.10                      | -0.07 | -0.06  | -0.06 | -0.07 | -0.13                 |   |                       |   |   |
| HILICneg_223.0201_0.54 | HILIC | neg        | 0.54            |            |            | 4    |          | 0.36079 | 0.67911                                 | -0.25 | -0.06  | -0.02 | -0.11 | 0.15                  | -0.41 | 0.36810               | 0.83957 | 0.07  | 0.18                       | 0.33  | 0.13   | 0.02  | -0.09 | -0.07                 |   |                       |   |   |
| HILICpos_223.0329_3.6  | HILIC | pos        | 3.6             |            |            | 4    |          | 0.30504 | 0.63407                                 | -0.27 | 0.05   | 0.00  | -0.18 | -0.31                 | -0.38 | 0.00082               | 0.05066 | 0.50  | 0.40                       | 0.43  | 0.14   | 0.65  | 0.57  | 0.47                  |   |                       |   |   |
| HILICpos_223.0743_0.47 | HILIC | pos        | 0.47            |            |            | 4    |          | 0.10355 | 0.43610                                 | 0.46  | 0.43   | 0.50  | 0.38  | 0.46                  | 0.69  | 0.43654               | 0.87671 | -0.44 | -0.50                      | -0.32 | -0.53  | -0.47 | -0.35 | -0.37                 |   |                       |   |   |
| RPpos_223.097_7.72     | RP    | pos        | 7.72            |            |            | 4    |          | 0.39605 | 0.70575                                 | -0.06 | 0.03   | 0.14  | -0.08 | 0.05                  | -0.28 | 0.72129               | 0.95590 | 0.02  | -0.04                      | 0.12  | 0.02   | 0.00  | 0.03  | -0.01                 |   |                       |   |   |
| HILICneg_223.0974_0.59 | HILIC | neg        | 0.59            |            |            | 4    |          | 0.32541 | 0.65102                                 | -0.20 | -0.23  | -0.18 | -0.18 | -0.17                 | -0.18 | 0.54759               | 0.91689 | -0.12 | -0.16                      | -0.08 | -0.05  | -0.18 | -0.12 | -0.11                 |   |                       |   |   |
| RPneg_223.09769_7.348  | RP    | neg        | 7.348           |            |            | 4    |          | 0.30988 | 0.63828                                 | -0.21 | -0.23  | -0.21 | -0.20 | -0.14                 | -0.16 | 0.45853               | 0.88479 | -0.15 | -0.18                      | -0.11 | -0.10  | -0.19 | -0.16 | -0.10                 |   |                       |   |   |
| HILICpos_223.105_4.55  | HILIC | pos        | 4.55            |            |            | 4    |          | 0.88155 | 0.95613                                 | -0.06 | 0.05   | 0.05  | -0.03 | -0.02                 | -0.56 | 0.87892               | 0.98244 | -0.04 | -0.03                      | -0.05 | -0.04  | 0.00  | -0.02 | -0.12                 |   |                       |   |   |

| Feature_ID             | Mode  | Ionization | Average.Rt.min. | Average.Mz | Metabolite | MSMS | ID_Level | HMDB_ID | IV-Alcohol self-administration (IV-ASA) |       |       |        |       |                       |       |          |         |       | IV-Alcohol clamp (IV-AC)   |       |       |       |       |                       |   |        |   |  |
|------------------------|-------|------------|-----------------|------------|------------|------|----------|---------|-----------------------------------------|-------|-------|--------|-------|-----------------------|-------|----------|---------|-------|----------------------------|-------|-------|-------|-------|-----------------------|---|--------|---|--|
|                        |       |            |                 |            |            |      |          |         | Area Under the Curve (AUC)              |       |       |        |       | IV-Ghrelin or Placebo |       |          |         |       | Area Under the Curve (AUC) |       |       |       |       | IV-Ghrelin or Placebo |   |        |   |  |
|                        |       |            |                 |            |            |      |          |         | Baseline                                |       |       | IV-ASA |       | BrAC=0                |       | Baseline |         |       | Post-LD                    |       | IV-AC |       |       | Post-AC               |   | BrAC=0 |   |  |
|                        |       |            |                 |            |            |      |          |         | p                                       | q     | d     | d      | d     | d                     | d     | d        | d       | d     | d                          | d     | d     | d     | d     | d                     | d | d      | d |  |
| RPneg_225.02298_5.647  | RP    | neg        | 5.647           | 225.0230   |            | 4    |          | 0.92709 | 0.97396                                 | 0.01  | -0.04 | 0.03   | -0.03 | 0.03                  | 0.65  | 0.77561  | 0.96493 | -0.15 | -0.13                      | -0.06 | -0.14 | -0.14 | -0.21 | -0.28                 |   |        |   |  |
| RPneg_225.02299_5.511  | RP    | neg        | 5.511           | 225.0230   |            | 4    |          | 0.83457 | 0.93788                                 | 0.00  | -0.01 | -0.01  | -0.04 | 0.01                  | 0.55  | 0.37025  | 0.84063 | 0.05  | 0.04                       | 0.10  | 0.02  | 0.16  | 0.18  | -0.09                 |   |        |   |  |
| HILICneg_225.0614_5.15 | HILIC | neg        | 5.15            | 225.0614   |            | 4    |          | 0.90837 | 0.96600                                 | 0.04  | -0.43 | 0.61   | 0.13  | 0.35                  | 0.52  | 0.20422  | 0.72035 | 0.35  | -0.38                      | 0.36  | 0.05  | 0.53  | 0.38  | 1.27                  |   |        |   |  |
| HILICneg_225.062_4.37  | HILIC | neg        | 4.37            | 225.0620   |            | 4    |          | 0.25339 | 0.59178                                 | -0.26 | -0.28 | -0.10  | -0.06 | -0.31                 | 0.21  | 0.72308  | 0.95590 | -0.10 | 0.26                       | 0.54  | -0.34 | 0.49  | 0.03  | -0.44                 |   |        |   |  |
| HILICneg_225.0626_6.28 | HILIC | neg        | 6.28            | 225.0623   |            | 4    |          | 0.32180 | 0.55815                                 | 0.29  | 0.37  | 0.73   | 0.88  | 0.71                  | -0.45 | 0.44626  | 0.88624 | 0.20  | 0.25                       | 0.12  | 0.28  | 0.34  | 0.10  | -0.03                 |   |        |   |  |
| HILICneg_225.063_0.77  | HILIC | neg        | 0.77            | 225.0630   |            | 4    |          | 0.64767 | 0.84879                                 | -0.16 | -0.09 | -0.07  | -0.12 | -0.13                 | 0.35  | 0.88836  | 0.85312 | -0.05 | -0.12                      | -0.27 | -0.04 | -0.11 | -0.07 |                       |   |        |   |  |
| HILICneg_225.0702_1.36 | HILIC | neg        | 1.36            | 225.0702   |            | 4    |          | 0.11955 | 0.45548                                 | 0.04  | 0.11  | 0.09   | 0.11  | 0.25                  | -0.22 | 0.45395  | 0.88356 | 0.19  | 0.15                       | 0.30  | 0.22  | 0.25  | 0.05  | 0.14                  |   |        |   |  |
| RPneg_225.07669_7.118  | RP    | neg        | 7.118           | 225.0767   |            | 4    |          | 0.64876 | 0.85145                                 | -0.05 | -0.05 | 0.10   | -0.08 | -0.01                 | 0.14  | 0.35525  | 0.83325 | 0.36  | 0.44                       | 0.28  | 0.28  | 0.57  | 0.30  | 0.25                  |   |        |   |  |
| RPneg_225.07732_13.188 | RP    | neg        | 13.188          | 225.0773   |            | 4    |          | 0.55927 | 0.80900                                 | -0.14 | 0.05  | 0.06   | -0.42 | 0.01                  | 0.52  | 0.54191  | 0.91464 | -0.08 | -0.08                      | -0.26 | -0.46 | 0.37  | 0.78  | -0.72                 |   |        |   |  |
| RPneg_225.08098_4.197  | RP    | neg        | 4.197           | 225.0810   |            | 4    |          | 0.42294 | 0.72491                                 | -0.25 | 0.24  | -0.13  | 0.01  | 0.51                  | -0.05 | 0.58897  | 0.92655 | -0.03 | -0.11                      | 0.86  | -0.45 | -0.03 | -0.59 | 0.10                  |   |        |   |  |
| RPneg_225.08847_2.294  | RP    | neg        | 2.294           | 225.0885   |            | 4    |          | 0.12129 | 0.45664                                 | -0.36 | 0.05  | -0.12  | -0.04 | -0.28                 | -0.13 | 0.16117  | 0.67081 | -0.33 | -0.28                      | -0.44 | -0.29 | -0.37 | -0.36 | -0.14                 |   |        |   |  |
| RPpos_225.0914_8.32    | RP    | pos        | 8.32            | 225.0914   |            | 4    |          | 0.04880 | 0.34358                                 | -0.62 | -0.08 | -0.26  | -0.04 | -0.23                 | -0.24 | 0.81398  | 0.97171 | 0.00  | 0.60                       | 0.19  | 0.23  | -0.94 | -0.12 | 0.30                  |   |        |   |  |
| RPneg_225.11298_7.095  | RP    | neg        | 7.095           | 225.1130   |            | 4    |          | 0.33257 | 0.65636                                 | 0.30  | -0.30 | 1.09   | 0.18  | 0.47                  | 0.11  | 0.00146  | 0.07206 | 0.63  | 0.13                       | 0.73  | 1.08  | 0.03  | 0.53  | 0.35                  |   |        |   |  |
| RPneg_225.11333_7.001  | RP    | neg        | 7.001           | 225.1133   |            | 4    |          | 0.36557 | 0.68294                                 | 0.28  | 0.25  | 0.41   | 0.46  | 0.73                  | -0.12 | 0.61408  | 0.93135 | -0.10 | 0.17                       | -0.14 | 0.11  | -0.36 | -0.16 | 0.02                  |   |        |   |  |
| HILICneg_225.1134_0.57 | HILIC | neg        | 0.57            | 225.1134   |            | 4    |          | 0.27071 | 0.60684                                 | 0.24  | -0.10 | 1.03   | 0.55  | 0.04                  | -0.31 | 0.00047  | 0.03539 | 0.46  | 0.16                       | 0.66  | 0.65  | 0.63  | 0.58  | -0.36                 |   |        |   |  |
| HILICpos_225.1593_0.55 | HILIC | pos        | 0.55            | 225.1593   |            | 4    |          | 0.06266 | 0.37022                                 | -0.51 | -0.04 | 0.49   | -0.34 | -0.63                 | 0.08  | 0.60113  | 0.92810 | -0.26 | -0.23                      | -0.02 | -0.16 | 0.09  | -0.84 | -0.56                 |   |        |   |  |
| HILICneg_225.9263_0.93 | HILIC | neg        | 0.92            | 225.9263   |            | 4    |          | 0.12826 | 0.46431                                 | -0.31 | -0.36 | -0.19  | -0.26 | -0.17                 | -0.20 | 0.23114  | 0.74783 | -0.27 | -0.23                      | -0.23 | -0.37 | -0.17 | -0.23 | -0.11                 |   |        |   |  |
| HILICneg_225.9342_4.33 | HILIC | neg        | 4.33            | 225.9342   |            | 4    |          | 0.97800 | 0.99142                                 | 0.05  | 0.11  | 0.33   | 0.12  | 0.01                  | 0.25  | 0.05568  | 0.46583 | 0.28  | 0.73                       | -0.21 | 0.11  | 0.54  | 0.57  | -0.43                 |   |        |   |  |
| HILICneg_225.987_6.41  | HILIC | neg        | 6.41            | 225.9870   |            | 4    |          | 0.22137 | 0.64757                                 | -0.29 | -0.18 | -0.02  | 0.03  | -0.50                 | -0.36 | 0.00170  | 0.07820 | -0.73 | -0.46                      | -0.28 | -0.26 | -0.25 | -0.77 | -0.13                 |   |        |   |  |
| RPneg_226.01761_4.276  | RP    | neg        | 4.276           | 226.0176   |            | 4    |          | 0.80894 | 0.92678                                 | 0.03  | 0.00  | 0.05   | 0.15  | 0.03                  | 0.52  | 0.19014  | 0.70555 | -0.22 | -0.22                      | -0.22 | -0.23 | -0.20 | -0.19 |                       |   |        |   |  |
| RPneg_226.01833_5.016  | RP    | neg        | 5.016           | 226.0183   |            | 4    |          | 0.23989 | 0.58101                                 | 0.33  | 0.24  | 0.30   | 0.31  | 0.43                  | 0.97  | 0.27384  | 0.78431 | -0.24 | -0.24                      | -0.24 | -0.26 | -0.23 | -0.21 | -0.21                 |   |        |   |  |
| RPneg_226.01836_3.258  | RP    | neg        | 3.258           | 226.0184   |            | 4    |          | 0.28580 | 0.61921                                 | 0.31  | 0.12  | 0.17   | 0.46  | 0.35                  | 1.76  | 0.34242  | 0.82748 | -0.26 | -0.28                      | -0.27 | -0.27 | -0.29 | -0.19 | -0.18                 |   |        |   |  |
| HILICneg_226.0184_0.54 | HILIC | neg        | 0.54            | 226.0184   |            | 4    |          | 0.79703 | 0.92156                                 | 0.03  | -0.01 | 0.05   | 0.16  | 0.02                  | 0.54  | 0.20371  | 0.71972 | -0.22 | -0.20                      | -0.20 | -0.23 | -0.21 | -0.20 | -0.17                 |   |        |   |  |
| HILICpos_226.0447_5.1  | HILIC | pos        | 5.1             | 226.0447   |            | 4    |          | 0.54961 | 0.80354                                 | 0.16  | 0.47  | 0.98   | 0.54  | 0.03                  | -0.53 | 0.16119  | 0.67081 | 0.45  | 0.07                       | 0.59  | 1.15  | 0.51  | 0.24  | -0.17                 |   |        |   |  |
| HILICneg_226.0447_1.24 | HILIC | neg        | 1.24            | 226.0447   |            | 4    |          | 0.94627 | 0.98034                                 | 0.13  | 0.21  | 0.41   | 0.32  | 0.23                  | 0.22  | 0.33568  | 0.82340 | -0.19 | -0.15                      | -0.02 | -0.27 | -0.13 | -0.08 | -0.41                 |   |        |   |  |
| HILICneg_226.057_2.33  | HILIC | neg        | 2.33            | 226.0570   |            | 4    |          | 0.90734 | 0.96581                                 | 0.08  | 0.11  | 0.19   | 0.45  | 0.23                  | 0.12  | 0.77433  | 0.96469 | -0.08 | -0.04                      | -0.18 | -0.13 | -0.12 | 0.12  | -0.09                 |   |        |   |  |
| HILICneg_226.0824_1.65 | HILIC | pos        | 1.65            | 226.0824   |            | 4    |          | 0.25175 | 0.59074                                 | -0.12 | 0.04  | 0.10   | -0.10 | 0.12                  | -0.13 | 0.11513  | 0.59925 | 1.20  | 1.17                       | 1.10  | 1.12  | 1.33  | 1.25  | 1.10                  |   |        |   |  |
| HILICneg_226.0836_5.69 | HILIC | neg        | 5.69            | 226.0836   |            | 4    |          | 0.03514 | 0.30720                                 | 0.55  | 0.41  | 1.24   | 0.65  | 0.39                  | 0.02  | 0.02213  | 0.31461 | 0.63  | 0.28                       | 0.58  | 1.08  | 0.88  | 0.82  | -0.32                 |   |        |   |  |
| HILICpos_226.1055_2.86 | HILIC | pos        | 2.86            | 226.1055   |            | 4    |          | 0.53536 | 0.79625                                 | 0.15  | 0.15  | 0.21   | 0.16  | 0.71                  | 0.12  | 0.34964  | 0.83054 | 0.37  | 0.03                       | -0.04 | 1.70  | 0.31  | 0.42  | -0.06                 |   |        |   |  |
| RPpos_226.1232_7.82    | RP    | pos        | 7.82            | 226.1232   |            | 4    |          | 0.04692 | 0.33960                                 | -0.52 | -0.07 | 0.42   | -0.43 | -0.53                 | -0.02 | 0.48951  | 0.89836 | -0.28 | 0.27                       | -0.29 | -0.14 | -0.50 | -0.05 | -0.31                 |   |        |   |  |
| HILICpos_226.1286_2.35 | HILIC | pos        | 2.35            | 226.1286   |            | 4    |          | 0.22989 | 0.57135                                 | 0.36  | 0.05  | 0.52   | 0.65  | 0.85                  | 0.13  | 0.98662  | 0.99793 | -0.02 | -0.06                      | -0.04 | 0.05  | 0.00  | -0.17 | -0.13                 |   |        |   |  |
| HILICpos_226.1795_0.38 | HILIC | pos        | 0.38            | 226.1795   |            | 4    |          | 0.53841 | 0.79800                                 | -0.24 | -0.14 | -0.05  | 0.01  | -0.03                 | -0.48 | 0.57089  | 0.92155 | 0.26  | 1.47                       | -0.28 | 0.42  | -0.03 | 0.18  | 0.47                  |   |        |   |  |
| RPpos_226.1801_10.97   | RP    | pos        | 10.97           | 226.1801   |            | 4    |          | 0.33233 | 0.64323                                 | -0.41 | -0.19 | -0.03  | 0.02  | -0.41                 | -0.50 | 0.56960  | 0.93221 | 0.25  | 1.56                       | -0.24 | 0.23  | -0.03 | 0.15  | 0.61                  |   |        |   |  |
| RPpos_226.1801_11.05   | RP    | pos        | 11.05           | 226.1801   |            | 4    |          | 0.20122 | 0.54594                                 | -0.49 | -0.17 | -0.03  | -0.16 | -0.46                 | -0.47 | 0.55690  | 0.91950 | 0.26  | 1.41                       | -0.28 | 0.57  | -0.03 | 0.21  | 0.61                  |   |        |   |  |
| RPpos_226.1805_7.59    | RP    | pos        | 7.59            | 226.1805   |            | 4    |          | 0.04876 | 0.34335                                 | -0.69 | -0.12 | -0.08  | -0.32 | -0.41                 | -0.21 | 0.72650  | 0.95612 | 0.14  | 2.33                       | -0.23 | 0.99  | -0.23 | 0.49  | 0.32                  |   |        |   |  |
| HILICneg_226.8012_7.08 | HILIC | neg        | 7.08            | 226.8012   |            | 4    |          | 0.27871 | 0.61342                                 | -0.36 | -0.54 | 0.08   | -0.20 | -0.37                 | 0.88  | 0.90496  | 0.98615 | 0.02  | 0.29                       | 0.03  | -0.04 | -0.55 | 0.17  | 0.62                  |   |        |   |  |
| HILICneg_226.8019_1.02 | HILIC | neg        | 1.02            | 226.8019   |            | 4    |          | 0.57338 | 0.81586                                 | 0.16  | 0.49  | 0.42   | 0.34  | 0.23                  | 0.09  | 0.75635  | 0.96233 | 0.21  | 0.33                       | 0.26  | 0.37  | 0.18  | -0.12 | 0.03                  |   |        |   |  |
| HILICneg_226.8242_0.93 | HILIC | neg        | 0.93            | 226.8242   |            | 4    |          | 0.02557 | 0.27934                                 | -0.30 | -0.12 | -0.14  | -0.32 | -0.17                 | -0.04 | 0.06321  | 0.48798 | -0.33 | -0.33                      | -0.21 | -0.30 | -0.28 | -0.36 | -0.27                 |   |        |   |  |
| HILICneg_226.8252_0.47 | HILIC | neg        | 0.47            | 226.8252   |            | 4    |          | 0.79079 | 0.91828                                 | 0.11  | 0.47  | -0.07  | 0.64  | 0.22                  | -0.13 | 0.62140  | 0.93338 | 0.02  | -0.16                      | 0.44  | 0.05  | 0.09  | 0.03  | -0.18                 |   |        |   |  |
| HILICpos_226.9509_4.3  | HILIC | pos        | 4.3             | 226.9509   |            | 4    |          | 0.26911 | 0.60509                                 | -0.41 | -0.07 | 0.05   | 0.01  | 0.03                  | -0.47 | 0.82625  | 0.97408 | -0.03 | 0.16                       | 0.14  | -0.31 | 0.09  | -0.10 | 0.16                  |   |        |   |  |
| HILICneg_226.9688_3.32 | HILIC | neg        | 3.32            | 226.9688   |            | 4    |          | 0.69137 | 0.87316                                 | -0.10 | -0.08 | 0.73   | 0.14  | 0.14                  | 0.27  | 0.00008  | 0.01020 | 0.66  | 0.58                       | 0.49  | 1.11  | 0.88  | 0.36  | 0.10                  |   |        |   |  |
| HILICneg_226.9688_3.22 | HILIC | neg        | 3.22            | 226.9688   |            | 4    |          | 0.77928 | 0.91346                                 | -0.09 | -0.05 | 0.60   | 0.23  | 0.17                  | 0.48  | 0.00035  | 0.02918 | 0.84  | 0.43                       | 0.89  | 1.43  | 0.98  | 0.56  | 0.64                  |   |        |   |  |
| HILICneg_226.9785_0.57 | HILIC | neg        | 0.57            | 226.9785   |            | 4    |          | 0.00695 | 0.16434                                 | -0.51 | -0.35 | -0.38  | -0.22 | -0.27                 | -0.43 | 0.56389  | 0.92038 | 0.00  | 0.25                       | 0.14  | -0.02 | -0.12 | 0.03  | -0.04                 |   |        |   |  |
| RPpos_226.9857_1.6     | RP    | pos        | 1.6             | 226.9857   |            | 4    |          | 0.45669 | 0.74856                                 | 0.16  | 0.02  | -0.24  | 0.29  | 0.71                  | 0.39  | 0.09171  | 0.55754 | 0.60  | 0.44                       | 0.35  | 0.40  | 0.61  | 0.28  | 1.02                  |   |        |   |  |
| RPneg_227.00244_4.829  | RP    | neg        | 4.829           | 227.0024   |            | 4    |          | 0.53325 | 0.79516                                 | 0.07  | 0.09  | 0.10   | 0.05  | 0.13                  | 0.59  | 0.39354  | 0.85381 | 0.01  | 0.02                       | 0.06  | 0.02  | 0.03  | 0.03  | 0.01                  |   |        |   |  |
| HILICneg_227.0384_0.44 | HILIC | neg        | 0.44            | 227.0384   |            | 4    |          | 0.36652 | 0.68353                                 | 0.51  | 0.16  | 0.17   | 0.46  | 1.06                  | 1.42  | 0.31025  | 0.80843 | 0.14  | 0.05                       | 0.08  | 0.17  | 0.16  | 0.24  | 0.06                  |   |        |   |  |
| RPneg_227.03867_6.283  | RP    | neg        | 6.283           | 227.0387   |            | 4    |          | 0.36729 | 0.68407                                 | 0.62  | 0.22  | 0.23   | 0.50  | 1.27                  | 1.70  | 0.33251  | 0.82228 | 0.18  | 0.10                       | 0.10  | 0.23  | 0.14  | 0.25  | 0.09                  |   |        |   |  |
| RPneg_227.03873_6.164  | RP    | neg        | 6.164           | 227.0387   |            | 4    |          | 0.66509 | 0.85973                                 | -0.03 | 0.06  | -0.10  | 0.06  | -0.04                 | 0.28  | 0.71727  | 0.95466 | -0.03 | 0.41                       | -0.03 | -0.09 | 0.07  | -0.11 | -0.08                 |   |        |   |  |
| RPneg_227.03909_6.547  | RP    | neg        | 6.547           | 227.0391   |            | 4    |          | 0.72601 | 0.88831                                 | 0.00  | 0.00  | 0.00   | 0.05  | 0.03                  | 0.37  | 0.08701  | 0.54547 | 0.04  | 0.02                       | 0.07  | 0.02  | 0.07  | 0.07  | -0.01                 |   |        |   |  |
| RPneg_227.03912_6.382  | RP    | neg        | 6.382           | 227.0391   |            | 4    |          | 0.57773 | 0.81697                                 |       |       |        |       |                       |       |          |         |       |                            |       |       |       |       |                       |   |        |   |  |





| Feature_ID             | Mode  | Ionization | Average_Rt.min. | Average_Mz | Metabolite | MSMS | ID_Level | HMDB_ID | IV-Alcohol self-administration (IV-ASA) |         |        |       |        |       |                       |       |                       |         |          |       | IV-Alcohol clamp (IV-AC)   |       |                       |       |       |   |                       |   |        |   |   |   |
|------------------------|-------|------------|-----------------|------------|------------|------|----------|---------|-----------------------------------------|---------|--------|-------|--------|-------|-----------------------|-------|-----------------------|---------|----------|-------|----------------------------|-------|-----------------------|-------|-------|---|-----------------------|---|--------|---|---|---|
|                        |       |            |                 |            |            |      |          |         | Area Under the Curve (AUC)              |         |        |       |        |       | IV-Ghrelin or Placebo |       |                       |         |          |       | Area Under the Curve (AUC) |       |                       |       |       |   | IV-Ghrelin or Placebo |   |        |   |   |   |
|                        |       |            |                 |            |            |      |          |         | Baseline                                |         | IV-ASA |       | BrAC=0 |       | Baseline              |       | IV-Ghrelin or Placebo |         | Baseline |       | Post-LD                    |       | IV-Ghrelin or Placebo |       | IV-AC |   | Post-AC               |   | BrAC=0 |   |   |   |
|                        |       |            |                 |            |            |      |          |         | p                                       | q       | d      | d     | d      | d     | p                     | q     | d                     | d       | d        | d     | p                          | q     | d                     | d     | d     | d | p                     | q | d      | d | d | d |
| RPneg_231.03307_3.203  | RP    | neg        | 3.203           |            |            |      | 4        |         | 0.42117                                 | 0.72390 | 0.12   | 0.10  | 0.11   | 0.05  | 0.21                  | 0.57  | 0.26680               | 0.77916 | -0.17    | -0.16 | -0.15                      | -0.17 | -0.19                 | -0.22 | -0.13 |   |                       |   |        |   |   |   |
| HILICneg_231.0331_0.4  | HILIC | neg        | 0.4             | 231.0331   |            |      | 4        |         | 0.09652                                 | 0.42632 | 0.41   | 0.24  | 0.54   | 0.55  | 0.74                  | 0.33  | 0.89182               | 0.98433 | 0.18     | 0.23  | 0.21                       | 0.15  | 0.21                  | 0.24  | -0.04 |   |                       |   |        |   |   |   |
| RPneg_231.03317_5.847  | RP    | neg        | 5.847           | 231.0332   |            |      | 4        |         | 0.82890                                 | 0.93506 | 0.17   | 0.11  | 0.30   | 0.26  | 0.25                  | 0.28  | 0.59824               | 0.92780 | 0.16     | 0.16  | 0.24                       | 0.17  | 0.19                  | 0.13  | 0.00  |   |                       |   |        |   |   |   |
| RPneg_231.03354_5.72   | RP    | neg        | 5.72            | 231.0335   |            |      | 4        |         | 0.00906                                 | 0.18726 | 0.74   | 0.57  | 0.91   | 1.02  | 0.67                  | 0.16  | 0.50566               | 0.90356 | 0.38     | 0.43  | 0.49                       | 0.39  | 0.42                  | 0.39  | 0.02  |   |                       |   |        |   |   |   |
| RPneg_231.03389_6.158  | RP    | neg        | 6.158           | 231.0338   |            |      | 4        |         | 0.66949                                 | 0.86207 | 0.20   | 0.55  | 0.77   | 0.92  | 0.07                  | 0.49  | 0.31775               | 0.81406 | -0.13    | -0.11 | -0.08                      | -0.11 | -0.14                 | -0.14 | -0.22 |   |                       |   |        |   |   |   |
| RPpos_231.0347_1.6     | RP    | pos        | 1.6             | 231.0347   |            |      | 4        |         | 0.53278                                 | 0.79473 | 0.14   | 0.17  | 0.35   | 0.25  | 0.19                  | 0.06  | 0.09056               | 0.54321 | 0.57     | 0.07  | 0.14                       | 0.31  | 0.52                  | 0.74  | 1.48  |   |                       |   |        |   |   |   |
| RPneg_231.04561_1.595  | RP    | neg        | 1.595           | 231.0456   |            |      | 4        |         | 0.60030                                 | 0.82876 | 0.13   | 0.39  | 0.06   | 0.11  | 0.39                  | 0.11  | 0.08920               | 0.55184 | 0.78     | 0.28  | 0.31                       | 0.68  | 0.82                  | 0.61  | 1.80  |   |                       |   |        |   |   |   |
| RPneg_231.04594_1.358  | RP    | neg        | 1.358           | 231.0459   |            |      | 4        |         | 0.05168                                 | 0.34917 | 0.61   | 0.50  | 0.30   | 0.50  | 1.45                  | 0.06  | 0.38509               | 0.84935 | 1.54     | 0.28  | 0.97                       | 2.36  | 0.59                  | 0.51  | 1.08  |   |                       |   |        |   |   |   |
| RPneg_231.04967_6.594  | RP    | neg        | 6.594           | 231.0497   |            |      | 4        |         | 0.22885                                 | 0.57056 | -0.23  | -0.23 | -0.21  | 0.01  | -0.20                 | 0.01  | 0.20866               | 0.72469 | -0.26    | -0.24 | -0.23                      | -0.24 | -0.26                 | -0.24 | -0.17 |   |                       |   |        |   |   |   |
| HILICneg_231.0629_6.98 | HILIC | neg        | 6.98            | 231.0629   |            |      | 4        |         | 0.38453                                 | 0.69734 | -0.23  | 0.02  | 0.19   | 0.06  | -0.06                 | -0.20 | 0.95516               | 0.99429 | -0.02    | -0.19 | 0.21                       | 0.31  | -0.14                 | -0.11 | -0.35 |   |                       |   |        |   |   |   |
| HILICpos_231.0839_2.35 | HILIC | pos        | 2.35            | 231.0839   |            |      | 4        |         | 0.24609                                 | 0.58661 | 0.35   | 0.10  | 0.48   | 0.64  | 0.89                  | 0.02  | 0.99933               | 0.99966 | -0.01    | -0.04 | -0.04                      | 0.04  | -0.01                 | -0.14 | -0.06 |   |                       |   |        |   |   |   |
| HILICneg_231.0871_5.69 | HILIC | neg        | 5.69            | 231.0871   |            |      | 4        |         | 0.37440                                 | 0.68997 | 0.21   | 0.08  | 0.79   | 0.57  | 0.20                  | 0.17  | 0.00723               | 0.17915 | 0.50     | 0.31  | 0.68                       | 0.64  | 0.48                  | 0.54  | -0.95 |   |                       |   |        |   |   |   |
| HILICneg_231.0873_4.11 | HILIC | neg        | 4.11            | 231.0873   |            |      | 4        |         | 0.74933                                 | 0.90008 | -0.09  | -0.08 | 0.30   | 0.49  | -0.39                 | -0.19 | 0.29303               | 0.79691 | 0.31     | 0.42  | 0.95                       | 0.82  | 0.18                  | -0.19 | -0.35 |   |                       |   |        |   |   |   |
| HILICneg_231.0874_0.96 | HILIC | neg        | 0.96            | 231.0874   |            |      | 4        |         | 0.69499                                 | 0.87492 | -0.10  | 0.34  | 0.07   | 0.31  | 0.09                  | -0.14 | 0.95836               | 0.99514 | 0.03     | -0.09 | 0.09                       | -0.12 | 0.03                  | 0.50  | -0.39 |   |                       |   |        |   |   |   |
| RPpos_231.1161_10.19   | RP    | pos        | 10.19           | 231.1161   |            |      | 4        |         | 0.29812                                 | 0.62834 | -0.43  | -0.03 | -0.22  | -0.19 | -0.01                 | 0.20  | 0.64844               | 0.93906 | -0.03    | -0.61 | 0.02                       | 0.47  | 0.11                  | 0.31  | 0.48  |   |                       |   |        |   |   |   |
| RPpos_231.1161_10.93   | RP    | pos        | 10.93           | 231.1161   |            |      | 4        |         | 0.00383                                 | 0.12650 | -0.57  | -0.03 | -0.50  | -0.14 | -0.58                 | 0.61  | 0.85216               | 0.97768 | 0.04     | -0.06 | -0.80                      | 0.08  | 0.58                  | 0.15  | 0.02  |   |                       |   |        |   |   |   |
| RPneg_231.12354_6.249  | RP    | neg        | 6.249           | 231.1235   |            |      | 4        |         | 0.00665                                 | 0.16134 | -0.87  | -0.72 | -0.27  | -0.05 | -1.01                 | 0.02  | 0.39376               | 0.85381 | 0.24     | -0.13 | -0.06                      | 0.06  | 0.15                  | 0.69  | 0.60  |   |                       |   |        |   |   |   |
| RPneg_231.12376_6.977  | RP    | neg        | 6.977           | 231.1238   |            |      | 4        |         | 0.05160                                 | 0.23292 | -0.70  | 0.33  | -0.03  | -0.43 | -0.27                 | 0.37  | 0.13311               | 0.62999 | -0.62    | -0.19 | -0.58                      | 0.42  | 0.61                  | 0.00  | 0.08  |   |                       |   |        |   |   |   |
| HILICpos_231.1342_4.84 | HILIC | pos        | 4.84            | 231.1342   |            |      | 4        |         | 0.35077                                 | 0.67100 | 0.22   | 0.55  | 0.77   | 0.50  | -0.04                 | -0.29 | 0.00993               | 0.21165 | 0.89     | 0.68  | 0.86                       | 1.50  | 0.71                  | 0.30  | -0.25 |   |                       |   |        |   |   |   |
| HILICpos_231.1701_5.48 | HILIC | pos        | 5.48            | 231.1701   |            |      | 4        |         | 0.68504                                 | 0.87003 | 0.16   | 0.07  | 0.30   | 0.47  | 0.22                  | -0.37 | 0.94080               | 0.99141 | 0.39     | 0.20  | 0.21                       | 0.37  | 0.39                  | 0.34  | 0.02  |   |                       |   |        |   |   |   |
| RPpos_231.2431_7.67    | RP    | pos        | 7.67            | 231.2431   |            |      | 4        |         | 0.24536                                 | 0.58617 | -0.17  | -0.14 | 0.35   | -0.22 | -0.07                 | -0.27 | 0.08711               | 0.54575 | -0.49    | -0.17 | -0.07                      | -0.56 | -0.21                 | -0.65 | 0.02  |   |                       |   |        |   |   |   |
| HILICneg_231.8567_0.52 | HILIC | neg        | 0.52            | 231.8567   |            |      | 4        |         | 0.11894                                 | 0.45527 | -0.07  | 0.00  | 0.00   | 0.13  | 0.04                  | 0.13  | 0.25805               | 0.77321 | -0.05    | -0.07 | -0.15                      | -0.06 | 0.04                  | -0.01 | -0.02 |   |                       |   |        |   |   |   |
| RPneg_231.93129_13.855 | RP    | neg        | 13.855          | 231.9313   |            |      | 4        |         | 0.32641                                 | 0.65171 | -0.35  | -0.46 | -0.07  | 0.27  | -0.21                 | 0.07  | 0.26104               | 0.77484 | -0.44    | -0.37 | 0.84                       | 0.00  | -1.21                 | -0.26 | -0.07 |   |                       |   |        |   |   |   |
| RPneg_231.93141_13.086 | RP    | neg        | 13.086          | 231.9314   |            |      | 4        |         | 0.41865                                 | 0.72219 | -0.22  | -0.08 | -0.92  | 0.09  | 0.54                  | 0.13  | 0.62386               | 0.93343 | 0.22     | 0.17  | 0.38                       | -0.43 | -0.08                 | 0.81  | -0.10 |   |                       |   |        |   |   |   |
| HILICneg_231.9315_0.96 | HILIC | neg        | 0.96            | 231.9315   |            |      | 4        |         | 0.86839                                 | 0.95065 | -0.06  | 0.37  | 0.34   | 0.20  | 0.48                  | -0.35 | 0.20033               | 0.71633 | -0.23    | -0.78 | -0.41                      | 0.12  | -0.22                 | -0.03 | -0.75 |   |                       |   |        |   |   |   |
| RPneg_231.9315_14.399  | RP    | neg        | 14.399          | 231.9315   |            |      | 4        |         | 0.05433                                 | 0.35528 | -0.40  | 0.31  | 0.55   | -0.29 | -0.41                 | 0.10  | 0.46327               | 0.88698 | -0.24    | 0.72  | -0.52                      | 0.02  | 1.55                  | -0.40 | -0.52 |   |                       |   |        |   |   |   |
| HILICneg_231.9316_0.55 | HILIC | neg        | 0.55            | 231.9316   |            |      | 4        |         | 0.34422                                 | 0.66569 | -0.24  | -0.79 | -0.15  | 0.01  | 0.57                  | -0.46 | 0.04735               | 0.43445 | 0.89     | 0.43  | 0.30                       | -0.10 | 0.35                  | 1.05  | -0.01 |   |                       |   |        |   |   |   |
| HILICneg_231.9317_4.11 | HILIC | neg        | 4.11            | 231.9317   |            |      | 4        |         | 0.99496                                 | 0.99821 | 0.00   | 0.26  | 1.03   | 0.30  | -0.30                 | -1.17 | 0.01146               | 0.22835 | 0.68     | 0.41  | 0.84                       | 1.76  | 1.13                  | 0.45  | -0.19 |   |                       |   |        |   |   |   |
| HILICneg_231.9317_0.39 | HILIC | neg        | 0.39            | 231.9317   |            |      | 4        |         | 0.75404                                 | 0.90249 | 0.10   | -0.10 | 0.34   | 0.52  | 1.84                  | -0.07 | 0.68005               | 0.94753 | -0.15    | -0.58 | -0.13                      | -0.51 | -0.05                 | 0.21  | 0.26  |   |                       |   |        |   |   |   |
| HILICneg_231.9317_6.96 | HILIC | neg        | 6.96            | 231.9317   |            |      | 4        |         | 0.98072                                 | 0.99266 | 0.04   | 0.05  | 0.15   | 0.42  | 0.42                  | -0.36 | 0.00000               | 0.00036 | 0.30     | 0.29  | 0.39                       | 0.04  | 0.58                  | 0.97  | -0.90 |   |                       |   |        |   |   |   |
| HILICneg_231.9318_4.91 | HILIC | neg        | 4.91            | 231.9318   |            |      | 4        |         | 0.67337                                 | 0.86385 | 0.15   | 0.52  | 1.20   | 0.46  | 0.18                  | 0.21  | 0.44789               | 0.88099 | 0.28     | 0.37  | 0.33                       | 0.70  | 1.90                  | -0.59 | -0.74 |   |                       |   |        |   |   |   |
| HILICneg_231.9318_5.67 | HILIC | neg        | 5.67            | 231.9318   |            |      | 4        |         | 0.05449                                 | 0.33555 | 0.44   | 0.67  | 0.55   | 0.07  | 0.36                  | 0.27  | 0.00011               | 0.01253 | 1.08     | 0.95  | 1.35                       | 0.61  | 0.33                  | 0.44  | -0.19 |   |                       |   |        |   |   |   |
| HILICneg_231.9318_5.85 | HILIC | neg        | 5.85            | 231.9318   |            |      | 4        |         | 0.95522                                 | 0.98780 | 0.05   | 0.44  | 0.68   | 0.33  | 0.25                  | -0.51 | 0.00673               | 0.17372 | 1.17     | 0.82  | -0.11                      | 1.24  | 0.71                  | 0.94  | -0.02 |   |                       |   |        |   |   |   |
| HILICneg_231.9318_6.39 | HILIC | neg        | 6.39            | 231.9318   |            |      | 4        |         | 0.08440                                 | 0.41025 | -0.52  | 0.06  | 0.07   | -0.59 | -0.14                 | 0.13  | 0.00980               | 0.21067 | 0.54     | 0.40  | 0.20                       | 0.46  | 0.33                  | 0.13  | 0.01  |   |                       |   |        |   |   |   |
| RPneg_231.93185_13.993 | RP    | neg        | 13.993          | 231.9319   |            |      | 4        |         | 0.21341                                 | 0.55588 | -0.30  | 0.00  | 0.05   | 0.13  | -0.55                 | 0.32  | 0.19594               | 0.71060 | 0.35     | 0.68  | 0.57                       | -0.08 | -0.03                 | 0.14  | -0.27 |   |                       |   |        |   |   |   |
| RPneg_231.93187_12.316 | RP    | neg        | 12.316          | 231.9319   |            |      | 4        |         | 0.39956                                 | 0.70831 | -0.23  | 0.23  | -0.10  | 0.26  | -0.48                 | -0.17 | 0.79580               | 0.96826 | 0.21     | -0.11 | 0.14                       | -0.26 | 0.34                  | 0.58  | -0.10 |   |                       |   |        |   |   |   |
| RPneg_231.93188_11.16  | RP    | neg        | 11.16           | 231.9319   |            |      | 4        |         | 0.06347                                 | 0.37148 | -0.83  | -0.26 | -0.02  | -0.06 | -1.60                 | 0.52  | 0.90243               | 0.98582 | -0.05    | -0.06 | 0.06                       | 0.15  | -0.17                 | 0.02  | -0.25 |   |                       |   |        |   |   |   |
| HILICneg_231.9319_7.1  | HILIC | neg        | 7.1             | 231.9319   |            |      | 4        |         | 0.16045                                 | 0.50402 | -0.31  | -0.25 | -0.34  | 0.11  | -0.20                 | 0.13  | 0.81477               | 0.97171 | 0.08     | -0.15 | -0.21                      | 0.50  | -0.01                 | 0.16  | -0.12 |   |                       |   |        |   |   |   |
| RPneg_231.9319_12.951  | RP    | neg        | 12.951          | 231.9319   |            |      | 4        |         | 0.58906                                 | 0.82348 | 0.17   | -0.08 | 0.50   | 0.15  | 0.43                  | 0.25  | 0.46754               | 0.88846 | 0.08     | -0.03 | 0.31                       | 1.67  | -0.44                 | -0.23 | -0.21 |   |                       |   |        |   |   |   |
| HILICneg_231.9319_5.97 | HILIC | neg        | 5.97            | 231.9319   |            |      | 4        |         | 0.50569                                 | 0.77954 | -0.17  | 0.04  | 0.36   | 0.09  | 0.09                  | -0.21 | 0.04479               | 0.42478 | 0.28     | 0.15  | 0.41                       | 0.58  | 0.47                  | 0.27  | -0.52 |   |                       |   |        |   |   |   |
| HILICneg_231.932_5.41  | HILIC | neg        | 5.41            | 231.9320   |            |      | 4        |         | 0.84730                                 | 0.94292 | -0.05  | 0.69  | 0.42   | -0.03 | 0.67                  | 0.31  | 0.00122               | 0.06441 | 0.29     | 0.23  | 0.01                       | 1.18  | 0.39                  | 0.54  | 0.23  |   |                       |   |        |   |   |   |
| HILICneg_231.932_4.21  | HILIC | neg        | 4.21            | 231.9320   |            |      | 4        |         | 0.13402                                 | 0.47291 | -0.44  | 0.13  | 0.35   | -0.01 | -0.59                 | -1.54 | 0.19678               | 0.71250 | 0.23     | -0.05 | 0.68                       | 0.50  | 0.65                  | -0.14 | -0.13 |   |                       |   |        |   |   |   |
| HILICneg_231.9322_1.39 | HILIC | neg        | 1.39            | 231.9322   |            |      | 4        |         | 0.92348                                 | 0.97251 | 0.09   | 0.08  | 0.53   | 0.13  | 0.14                  | 0.36  | 0.26201               | 0.77484 | 0.27     | 0.41  | -0.13                      | 0.26  | 0.64                  | -0.01 | 0.44  |   |                       |   |        |   |   |   |
| HILICpos_232.0164_5.8  | HILIC | pos        | 5.8             | 232.0164   |            |      | 4        |         | 0.15787                                 | 0.50097 | -0.27  | 0.37  | 0.61   | -0.50 | 0.11                  | -0.94 | 0.27473               | 0.78509 | 0.68     | 0.38  | 0.38                       | 0.68  | 0.55                  | 0.74  | -0.87 |   |                       |   |        |   |   |   |
| RPneg_232.02861_1.371  | RP    | neg        | 1.371           | 232.0286   |            |      | 4        |         | 0.82489                                 | 0.93365 | 0.06   | 0.09  | 0.96   | 0.26  | -0.10                 | -0.82 | 0.01564               | 0.26791 | 0.52     | 0.41  | 0.64                       | 1.15  | 0.65                  | 0.28  | -0.14 |   |                       |   |        |   |   |   |
| HILICneg_232.0287_2.04 | HILIC | neg        | 2.04            | 232.0287   |            |      | 4        |         | 0.97743                                 | 0.99111 | -0.01  | -0.04 | 0.38   | 0.21  | -0.06                 | -0.30 | 0.07631               | 0.52148 | -0.18    | 0.02  | 0.14                       | 0.40  | 0.54                  | 0.11  | -0.30 |   |                       |   |        |   |   |   |
| HILICneg_232.0289_1.64 | HILIC | neg        | 1.64            | 232.0289   |            |      | 4        |         | 0.88249                                 | 0.95651 | -0.03  | -0.02 | 0.36   | 0.16  | -0.07                 | -0.30 | 0.03890               | 0.40211 | 0.38     | 0.07  | 0.17                       | 0.49  | 0.58                  | 0.32  | -0.12 |   |                       |   |        |   |   |   |
| HILICneg_232.0466_6.41 | HILIC | neg        | 6.41            | 232.0466   |            |      | 4        |         | 0.06199                                 | 0.36881 | -0.39  | 0.24  | -0.05  | -0.22 | -0.08                 | -0.75 | 0.22726               | 0.74437 | 0.42     | 0.91  | 0.74                       | 0.35  | 0.13                  | 0.01  | 0.18  |   |                       |   |        |   |   |   |
| RPneg_232.05872_2.112  | RP    | neg        | 2.112           | 232.0587   |            |      | 4        |         |                                         |         |        |       |        |       |                       |       |                       |         |          |       |                            |       |                       |       |       |   |                       |   |        |   |   |   |



| Feature_ID             | Mode  | Ionization | Average_Rt.min. | Average_Mz | Metabolite | MSMS | ID_Level | HMDB_ID | IV-Alcohol self-administration (IV-ASA) |         |       |        |       |       |                       |       |         |          |       |       | IV-Alcohol clamp (IV-AC)   |       |       |       |       |   |                       |  |  |  |  |  |
|------------------------|-------|------------|-----------------|------------|------------|------|----------|---------|-----------------------------------------|---------|-------|--------|-------|-------|-----------------------|-------|---------|----------|-------|-------|----------------------------|-------|-------|-------|-------|---|-----------------------|--|--|--|--|--|
|                        |       |            |                 |            |            |      |          |         | Area Under the Curve (AUC)              |         |       |        |       |       | IV-Ghrelin or Placebo |       |         |          |       |       | Area Under the Curve (AUC) |       |       |       |       |   | IV-Ghrelin or Placebo |  |  |  |  |  |
|                        |       |            |                 |            |            |      |          |         | Baseline                                |         |       | IV-ASA |       |       | BrAc=0                |       |         | Baseline |       |       | Post-LD                    |       |       | IV-AC |       |   | BrAc=0                |  |  |  |  |  |
|                        |       |            |                 |            |            |      |          |         | p                                       | q       | d     | d      | d     | d     | d                     | d     | d       | p        | q     | d     | d                          | d     | d     | d     | d     | d |                       |  |  |  |  |  |
| RPneg_239.03828_6.395  | RP    | neg        | 6.395           |            | 239.0383   |      | 4        |         | 0.43763                                 | 0.73540 | -0.03 | -0.10  | 0.03  | -0.06 | -0.03                 | 0.38  | 0.15019 | 0.65514  | 0.09  | 0.09  | 0.20                       | 0.04  | 0.15  | 0.11  | -0.01 |   |                       |  |  |  |  |  |
| RPneg_239.03831_6.542  | RP    | neg        | 6.542           |            | 239.0383   |      | 4        |         | 0.54009                                 | 0.79830 | -0.07 | -0.21  | -0.06 | -0.07 | -0.01                 | 0.34  | 0.18807 | 0.70302  | 0.30  | 0.15  | 0.36                       | 0.16  | -0.15 | 0.69  | 0.61  |   |                       |  |  |  |  |  |
| RPneg_239.03833_6.821  | RP    | neg        | 6.821           |            | 239.0383   |      | 4        |         | 0.88009                                 | 0.95538 | 0.00  | 0.03   | -0.02 | -0.06 | 0.11                  | 0.35  | 0.06547 | 0.49492  | 0.07  | 0.03  | 0.06                       | 0.06  | 0.10  | 0.15  | -0.01 |   |                       |  |  |  |  |  |
| HILICneg_239.0596_4.21 | HILIC | neg        | 4.21            |            | 239.0596   |      | 4        |         | 0.29198                                 | 0.62470 | -0.16 | 0.31   | 0.60  | -0.05 | -0.50                 | -0.66 | 0.74362 | 0.96041  | 0.03  | -0.37 | 0.17                       | 0.37  | 0.21  | -0.29 | -0.30 |   |                       |  |  |  |  |  |
| RPneg_239.0675_9.065   | RP    | neg        | 9.065           |            | 239.0675   |      | 4        |         | 0.24728                                 | 0.58788 | -0.23 | 0.29   | 0.11  | -0.08 | 0.13                  | -0.31 | 0.01521 | 0.87083  | -0.08 | -0.05 | -0.00                      | 0.15  | -0.09 | -0.30 | 0.08  |   |                       |  |  |  |  |  |
| HILICneg_239.0786_6.98 | HILIC | neg        | 6.98            |            | 239.0786   |      | 4        |         | 0.29607                                 | 0.62712 | 0.22  | 0.21   | 0.68  | 0.43  | 0.03                  | -0.30 | 0.03092 | 0.66565  | 0.04  | 0.35  | 0.33                       | 0.43  | 0.53  | 0.19  | -0.34 |   |                       |  |  |  |  |  |
| RPpos_239.0916_5.48    | RP    | pos        | 5.48            |            | 239.0916   |      | 4        |         | 0.87914                                 | 0.95493 | -0.20 | -0.15  | 0.01  | -0.15 | -0.14                 | -0.33 | 0.06744 | 0.50052  | 0.00  | -0.24 | 0.18                       | 0.17  | 0.05  | -0.12 | -0.14 |   |                       |  |  |  |  |  |
| RPpos_239.0923_6.549   | RP    | pos        | 6.549           |            | 239.0923   |      | 4        |         | 0.00773                                 | 0.17338 | -0.66 | 0.22   | -0.20 | -0.57 | -0.58                 | -0.07 | 0.02050 | 0.30306  | -0.71 | -0.11 | -0.21                      | -0.74 | -1.14 | -0.74 | -0.30 |   |                       |  |  |  |  |  |
| HILICneg_239.0928_0.5  | HILIC | neg        | 0.5             |            | 239.0928   |      | 4        |         | 0.38908                                 | 0.70095 | -0.07 | 0.00   | 0.09  | -0.11 | 0.04                  | -0.30 | 0.84181 | 0.97652  | 0.05  | -0.02 | 0.09                       | 0.05  | 0.05  | 0.10  | 0.01  |   |                       |  |  |  |  |  |
| RPneg_239.12868_7.757  | RP    | neg        | 7.757           |            | 239.1287   |      | 4        |         | 0.06850                                 | 0.38091 | -0.17 | -0.20  | -0.04 | -0.09 | 0.03                  | -0.22 | 0.87470 | 0.98206  | -0.03 | 0.00  | -0.11                      | -0.11 | 0.04  | 0.08  | -0.07 |   |                       |  |  |  |  |  |
| RPneg_239.12891_7.666  | RP    | neg        | 7.666           |            | 239.1289   |      | 4        |         | 0.22958                                 | 0.57111 | 0.37  | 0.36   | 0.53  | 0.68  | 0.14                  | -0.47 | 0.99888 | 0.99963  | 0.01  | -0.11 | 0.27                       | 0.68  | -0.38 | -0.28 | -0.42 |   |                       |  |  |  |  |  |
| RPneg_239.12947_7.901  | RP    | neg        | 7.901           |            | 239.1295   |      | 4        |         | 0.23954                                 | 0.58092 | 0.28  | 0.43   | 1.46  | 0.67  | -0.39                 | -0.22 | 0.13721 | 0.63602  | 0.68  | 0.35  | 0.72                       | 1.53  | 0.65  | 0.38  | 0.06  |   |                       |  |  |  |  |  |
| HILICpos_239.1388_0.54 | HILIC | pos        | 0.54            |            | 239.1388   |      | 4        |         | 0.39325                                 | 0.70344 | -0.27 | 0.00   | 1.11  | -0.37 | -0.19                 | 0.26  | 0.25375 | 0.76928  | -0.30 | -0.24 | -0.15                      | -0.18 | -0.04 | -0.51 | -0.57 |   |                       |  |  |  |  |  |
| HILICpos_239.1481_0.62 | HILIC | pos        | 0.62            |            | 239.1481   |      | 4        |         | 0.26600                                 | 0.60223 | -0.32 | -0.40  | 0.01  | 0.29  | -0.21                 | -0.09 | 0.56947 | 0.92121  | -0.27 | -0.09 | -0.26                      | -0.23 | -0.02 | -0.36 | -0.11 |   |                       |  |  |  |  |  |
| RPpos_239.1487_2.75    | RP    | pos        | 2.75            |            | 239.1487   |      | 4        |         | 0.09521                                 | 0.42498 | -0.51 | -0.44  | 0.37  | -0.18 | -0.10                 | 0.08  | 0.49950 | 0.90107  | -0.31 | -0.15 | -0.30                      | -0.43 | 0.18  | -0.54 | -0.67 |   |                       |  |  |  |  |  |
| RPpos_239.1624_8.45    | RP    | pos        | 8.45            |            | 239.1624   |      | 4        |         | 0.12476                                 | 0.46025 | -0.36 | -0.07  | -0.18 | -0.17 | -0.42                 | 0.00  | 0.52143 | 0.90888  | -0.25 | -0.39 | -0.21                      | -0.33 | -0.21 | -0.37 | -0.03 |   |                       |  |  |  |  |  |
| RPpos_239.1625_8.51    | RP    | pos        | 8.51            |            | 239.1625   |      | 4        |         | 0.14612                                 | 0.48719 | -0.35 | -0.16  | -0.15 | -0.14 | -0.45                 | -0.03 | 0.21446 | 0.73103  | -0.29 | -0.51 | -0.33                      | -0.33 | -0.35 | -0.43 | 0.01  |   |                       |  |  |  |  |  |
| RPpos_239.1646_9.59    | RP    | pos        | 9.59            |            | 239.1646   |      | 4        |         | 0.08213                                 | 0.40677 | 0.38  | 0.13   | 0.72  | 0.60  | 0.76                  | 0.38  | 0.04841 | 0.43953  | 0.42  | 0.18  | 0.31                       | 0.58  | 0.42  | 0.43  | 0.27  |   |                       |  |  |  |  |  |
| RPneg_239.16507_8.057  | RP    | neg        | 8.057           |            | 239.1651   |      | 4        |         | 0.82044                                 | 0.93183 | -0.06 | 0.07   | -0.04 | -0.17 | 0.27                  | -0.16 | 0.20134 | 0.71726  | -0.12 | 0.73  | 0.00                       | 0.57  | 0.00  | -0.08 | 0.00  |   |                       |  |  |  |  |  |
| RPneg_239.16536_10.041 | RP    | neg        | 10.041          |            | 239.1654   |      | 4        |         | 0.95448                                 | 0.98355 | 0.04  | -0.04  | 0.00  | 0.02  | 0.79                  | 0.36  | 0.39347 | 0.85338  | -0.18 | 0.42  | 0.36                       | 0.20  | 0.10  | 0.10  | 0.22  |   |                       |  |  |  |  |  |
| RPneg_239.16559_9.126  | RP    | neg        | 9.126           |            | 239.1656   |      | 4        |         | 0.06473                                 | 0.37488 | -0.86 | -0.04  | 0.64  | 0.65  | 1.49                  | 0.31  | 0.08347 | 0.53792  | 0.57  | 0.43  | 0.73                       | 0.63  | 0.08  | 0.32  | 0.52  |   |                       |  |  |  |  |  |
| RPneg_239.16583_9.349  | RP    | neg        | 9.349           |            | 239.1658   |      | 4        |         | 0.07268                                 | 0.39029 | -0.32 | 0.30   | -0.28 | -0.37 | 0.33                  | -0.30 | 0.61494 | 0.93677  | 0.11  | 0.18  | 0.49                       | -0.05 | -0.27 | -0.39 | 0.26  |   |                       |  |  |  |  |  |
| HILICneg_239.7603_1.47 | HILIC | neg        | 1.47            |            | 239.7603   |      | 4        |         | 0.03332                                 | 0.30328 | -0.68 | 0.43   | -0.99 | -0.61 | -0.10                 | -0.06 | 0.91963 | 0.98860  | 0.02  | 0.26  | 0.21                       | 0.62  | 0.28  | 0.28  | -0.08 |   |                       |  |  |  |  |  |
| HILICneg_239.8521_0.52 | HILIC | neg        | 0.52            |            | 239.8521   |      | 4        |         | 0.02485                                 | 0.27621 | -0.13 | -0.02  | -0.09 | -0.11 | -0.05                 | 0.03  | 0.29710 | 0.79957  | -0.02 | -0.11 | -0.08                      | 0.02  | -0.06 | 0.07  | 0.11  |   |                       |  |  |  |  |  |
| HILICneg_239.8995_6.23 | HILIC | neg        | 6.23            |            | 239.8995   |      | 4        |         | 0.41874                                 | 0.72221 | -0.14 | 0.01   | 0.51  | -0.05 | 0.12                  | -0.38 | 0.39031 | 0.85135  | 0.37  | 0.15  | 0.31                       | 0.94  | -0.27 | -0.08 | 0.64  |   |                       |  |  |  |  |  |
| HILICneg_239.9042_0.92 | HILIC | neg        | 0.92            |            | 239.9042   |      | 4        |         | 0.09756                                 | 0.42766 | -0.32 | -0.35  | -0.28 | -0.22 | -0.34                 | -0.25 | 0.10895 | 0.58871  | -0.35 | -0.42 | -0.33                      | -0.42 | -0.20 | -0.36 | -0.11 |   |                       |  |  |  |  |  |
| RPneg_239.93069_1.361  | RP    | neg        | 1.361           |            | 239.9307   |      | 4        |         | 0.37171                                 | 0.68789 | 0.20  | -0.13  | 0.17  | 0.32  | 0.61                  | 0.09  | 0.68173 | 0.94804  | 0.11  | 0.05  | 0.26                       | 1.34  | -0.44 | -0.55 | 0.46  |   |                       |  |  |  |  |  |
| HILICneg_239.9911_2.11 | HILIC | neg        | 2.11            |            | 239.9911   |      | 4        |         | 0.28337                                 | 0.61746 | -0.15 | 0.27   | 0.30  | -0.24 | 0.12                  | 0.42  | 0.23198 | 0.74904  | -0.31 | 0.07  | -0.67                      | -0.10 | 0.08  | -0.34 | -0.49 |   |                       |  |  |  |  |  |
| HILICneg_240.0107_6.23 | HILIC | neg        | 6.23            |            | 240.0107   |      | 4        |         | 0.55701                                 | 0.80791 | -0.11 | 0.38   | 0.60  | 0.21  | 0.09                  | -0.54 | 0.36402 | 0.83773  | 0.30  | -0.04 | 0.29                       | 0.73  | -0.21 | 0.28  | 0.11  |   |                       |  |  |  |  |  |
| HILICneg_240.0282_0.97 | HILIC | neg        | 0.97            |            | 240.0282   |      | 4        |         | 0.90773                                 | 0.96591 | 0.03  | 0.24   | 0.22  | 0.21  | 0.26                  | 0.03  | 0.30239 | 0.80374  | 0.22  | 0.26  | 0.36                       | 0.23  | 0.30  | 0.13  | 0.24  |   |                       |  |  |  |  |  |
| RPneg_240.0355_4.174   | RP    | neg        | 4.174           |            | 240.0356   |      | 4        |         | 0.61202                                 | 0.83415 | -0.04 | -0.02  | -0.02 | 0.02  | -0.01                 | 0.30  | 0.62211 | 0.93343  | 0.22  | 0.38  | 0.23                       | 0.39  | 0.33  | 0.17  | -0.06 |   |                       |  |  |  |  |  |
| HILICneg_240.0545_4.98 | HILIC | neg        | 4.98            |            | 240.0545   |      | 4        |         | 0.49035                                 | 0.77143 | -0.19 | -0.03  | -0.02 | -0.06 | -0.26                 | -0.80 | 0.68438 | 0.94844  | -0.14 | -0.08 | -0.05                      | -0.01 | -0.07 | -0.17 | -0.62 |   |                       |  |  |  |  |  |
| HILICpos_240.0596_10.3 | HILIC | pos        | 10.3            |            | 240.0596   |      | 4        |         | 0.95630                                 | 0.98427 | 0.13  | 0.19   | 0.25  | 0.30  | 0.22                  | -0.27 | 0.01919 | 0.84236  | 0.09  | 0.24  | 0.05                       | 0.12  | 0.10  | 0.13  | 0.22  |   |                       |  |  |  |  |  |
| RPpos_240.0986_10.3    | RP    | pos        | 10.3            |            | 240.0986   |      | 4        |         | 0.03387                                 | 0.30413 | -0.43 | 0.30   | 1.11  | 0.33  | -0.28                 | -0.26 | 0.11529 | 0.59932  | -0.24 | -0.27 | -0.24                      | -0.55 | 0.01  | -0.08 | -0.54 |   |                       |  |  |  |  |  |
| RPpos_240.1016_2.03    | RP    | pos        | 2.03            |            | 240.1016   |      | 4        |         | 0.30926                                 | 0.63779 | -0.11 | -0.05  | 0.01  | 0.06  | -0.06                 | 0.00  | 0.29819 | 0.80013  | -0.18 | -0.13 | -0.16                      | -0.23 | -0.11 | -0.22 | -0.26 |   |                       |  |  |  |  |  |
| HILICpos_240.1018_1.69 | HILIC | pos        | 1.69            |            | 240.1018   |      | 4        |         | 0.36314                                 | 0.68111 | -0.10 | 0.00   | 0.02  | 0.09  | -0.04                 | 0.00  | 0.29428 | 0.79782  | -0.17 | -0.16 | -0.14                      | -0.17 | -0.18 | -0.19 | -0.25 |   |                       |  |  |  |  |  |
| RPneg_240.91315_5.238  | RP    | neg        | 5.238           |            | 240.9132   |      | 4        |         | 0.30647                                 | 0.63532 | -0.24 | -0.25  | -0.24 | -0.24 | -0.24                 | -0.31 | 0.29859 | 0.80069  | 0.51  | 0.58  | 0.63                       | 0.55  | 0.44  | 0.42  | 0.38  |   |                       |  |  |  |  |  |
| HILICneg_240.9134_0.41 | HILIC | neg        | 0.41            |            | 240.9134   |      | 4        |         | 0.71532                                 | 0.88424 | -0.26 | -0.26  | -0.31 | -0.22 | -0.24                 | -0.31 | 0.30137 | 0.80305  | 0.43  | 0.41  | 0.87                       | 0.44  | 0.28  | 0.09  | 0.08  |   |                       |  |  |  |  |  |
| HILICneg_240.9736_3    | HILIC | neg        | 3               |            | 240.9736   |      | 4        |         | 0.76383                                 | 0.90683 | 0.09  | 0.06   | 0.50  | 0.31  | 0.49                  | 0.40  | 0.04183 | 0.41483  | 0.56  | 0.51  | 0.64                       | 1.14  | 0.46  | 0.23  | 0.19  |   |                       |  |  |  |  |  |
| HILICneg_240.9737_3.15 | HILIC | neg        | 3.15            |            | 240.9737   |      | 4        |         | 0.75244                                 | 0.90158 | -0.08 | 0.15   | 0.71  | 0.36  | 0.04                  | 0.09  | 0.22629 | 0.74317  | 0.48  | -0.02 | 0.58                       | 0.48  | 0.11  | 0.43  | 0.42  |   |                       |  |  |  |  |  |
| RPneg_240.97856_2.431  | RP    | neg        | 2.431           |            | 240.9786   |      | 4        |         | 0.61841                                 | 0.83790 | -0.14 | -0.02  | -0.06 | -0.21 | -0.10                 | 0.19  | 0.09922 | 0.57103  | 0.31  | 0.30  | 0.41                       | 0.26  | 0.29  | 0.24  | 0.44  |   |                       |  |  |  |  |  |
| RPneg_240.98149_3.18   | RP    | neg        | 3.18            |            | 240.9815   |      | 4        |         | 0.70763                                 | 0.88071 | 0.04  | 0.18   | 0.45  | 0.29  | -0.16                 | -0.59 | 0.30257 | 0.80376  | -0.16 | -0.26 | -0.21                      | -0.18 | -0.07 | -0.12 | -0.11 |   |                       |  |  |  |  |  |
| HILICpos_240.9833_0.94 | HILIC | pos        | 0.94            |            | 240.9833   |      | 4        |         | 0.96379                                 | 0.98696 | -0.04 | 0.20   | 0.08  | 0.39  | 0.12                  | 0.05  | 0.02113 | 0.30723  | -0.32 | -0.34 | -0.53                      | -0.31 | -0.11 | -0.08 | -0.58 |   |                       |  |  |  |  |  |
| HILICneg_240.9986_1.94 | HILIC | neg        | 1.94            |            | 240.9986   |      | 4        |         | 0.47944                                 | 0.76366 | 0.15  | 0.11   | 0.59  | 0.44  | 0.22                  | -0.39 | 0.47063 | 0.89070  | 0.54  | 0.67  | 0.91                       | 0.50  | 0.83  | 0.24  | 0.23  |   |                       |  |  |  |  |  |
| RPpos_241.0016_1.05    | RP    | pos        | 1.05            |            | 241.0016   |      | 4        |         | 0.91521                                 | 0.96888 | -0.03 | -0.10  | -0.24 | -0.04 | 0.43                  | 0.00  | 0.14064 | 0.64260  | 0.43  | 0.16  | 0.03                       | -0.01 | 0.70  | 0.18  | 1.65  |   |                       |  |  |  |  |  |
| RPpos_241.0018_1.6     | RP    | pos        | 1.6             |            | 241.0018   |      | 4        |         | 0.69341                                 | 0.87414 | 0.08  | 0.06   | 0.08  | 0.02  | 0.62                  | -0.16 | 0.10456 | 0.58038  | 0.59  | 0.30  | 0.04                       | 0.20  | 0.82  | 0     |       |   |                       |  |  |  |  |  |

| Feature_ID             | Mode  | Ionization | Average_Rt.min. | Average_Mz | Metabolite | MSMS | ID_Level | HMDB_ID | IV-Alcohol self-administration (IV-ASA) |         |        |       |        |       |                       |       |                       |         |          |       | IV-Alcohol clamp (IV-AC)   |       |                       |       |       |   |                       |   |        |   |   |   |
|------------------------|-------|------------|-----------------|------------|------------|------|----------|---------|-----------------------------------------|---------|--------|-------|--------|-------|-----------------------|-------|-----------------------|---------|----------|-------|----------------------------|-------|-----------------------|-------|-------|---|-----------------------|---|--------|---|---|---|
|                        |       |            |                 |            |            |      |          |         | Area Under the Curve (AUC)              |         |        |       |        |       | IV-Ghrelin or Placebo |       |                       |         |          |       | Area Under the Curve (AUC) |       |                       |       |       |   | IV-Ghrelin or Placebo |   |        |   |   |   |
|                        |       |            |                 |            |            |      |          |         | Baseline                                |         | IV-ASA |       | BrAC=0 |       | Baseline              |       | IV-Ghrelin or Placebo |         | Baseline |       | Post-LD                    |       | IV-Ghrelin or Placebo |       | IV-AC |   | Post-AC               |   | BrAC=0 |   |   |   |
|                        |       |            |                 |            |            |      |          |         | p                                       | q       | d      | d     | d      | d     | p                     | q     | d                     | d       | d        | d     | p                          | q     | d                     | d     | d     | d | p                     | q | d      | d | d | d |
| HILICpos_242.0102_0.94 | HILIC | pos        | 0.94            | 242.0102   |            |      | 4        |         | 0.64976                                 | 0.85188 | 0.07   | 0.02  | 0.31   | 0.30  | 0.18                  | -0.19 | 0.00055               | 0.03928 | -0.53    | -0.55 | -0.60                      | -0.59 | -0.35                 | -0.47 | -0.55 |   |                       |   |        |   |   |   |
| RPneg_242.01266_2.126  | RP    | neg        | 2.126           | 242.0127   |            |      | 4        |         | 0.53237                                 | 0.79462 | 0.08   | 0.03  | 0.20   | 0.25  | 0.02                  | 0.30  | 0.30066               | 0.80244 | -0.14    | -0.14 | -0.14                      | -0.15 | -0.12                 | -0.14 | -0.05 |   |                       |   |        |   |   |   |
| RPneg_242.01271_2.49   | RP    | neg        | 2.49            | 242.0127   |            |      | 4        |         | 0.50293                                 | 0.77795 | 0.10   | 0.06  | 0.21   | 0.27  | 0.03                  | 0.43  | 0.27574               | 0.78622 | -0.14    | -0.14 | -0.14                      | -0.19 | -0.11                 | -0.12 | -0.03 |   |                       |   |        |   |   |   |
| RPneg_242.01299_3.44   | RP    | neg        | 3.44            | 242.0130   |            |      | 4        |         | 0.55805                                 | 0.80851 | -0.01  | 0.13  | 0.32   | -0.05 | -0.06                 | 0.18  | 0.34666               | 0.82968 | -0.21    | -0.14 | -0.42                      | -0.08 | -0.41                 | 0.12  | -0.01 |   |                       |   |        |   |   |   |
| HILICpos_242.0189_5.00 | HILIC | pos        | 5.09            | 242.0189   |            |      | 4        |         | 0.74663                                 | 0.89099 | 0.06   | 0.04  | 0.13   | 0.27  | 0.02                  | -0.68 | 0.28885               | 0.79431 | 0.20     | 0.08  | 0.59                       | 0.53  | 0.30                  | 0.01  | -0.52 |   |                       |   |        |   |   |   |
| HILICneg_242.0285_1.33 | HILIC | neg        | 1.33            | 242.0285   |            |      | 4        |         | 0.94183                                 | 0.97871 | 0.14   | 0.30  | 0.67   | 0.14  | -0.36                 | -0.01 | 0.00084               | 0.51142 | 0.34     | 0.04  | 0.12                       | 0.46  | 0.56                  | 0.11  | 0.12  |   |                       |   |        |   |   |   |
| HILICneg_242.0518_5.96 | HILIC | neg        | 5.96            | 242.0518   |            |      | 4        |         | 0.54467                                 | 0.80062 | 0.06   | 0.23  | 0.38   | 0.21  | 0.11                  | -0.89 | 0.29747               | 0.79978 | 0.26     | 0.26  | 0.19                       | 0.36  | 0.40                  | 0.21  | -0.01 |   |                       |   |        |   |   |   |
| HILICneg_242.0524_5.69 | HILIC | neg        | 5.69            | 242.0524   |            |      | 4        |         | 0.17179                                 | 0.51720 | 0.50   | -0.13 | 1.16   | 0.60  | 0.51                  | 0.77  | 0.00445               | 0.13864 | 0.55     | 0.28  | 0.84                       | 0.38  | 0.58                  | 0.55  | 0.80  |   |                       |   |        |   |   |   |
| HILICneg_242.0534_1.94 | HILIC | neg        | 1.94            | 242.0534   |            |      | 4        |         | 0.61153                                 | 0.83394 | 0.10   | 0.23  | 0.52   | 0.39  | 0.14                  | -0.31 | 0.97451               | 0.99690 | 0.42     | 0.51  | 0.63                       | 0.45  | 0.79                  | 0.23  | 0.10  |   |                       |   |        |   |   |   |
| HILICneg_242.0758_6.41 | HILIC | neg        | 6.41            | 242.0758   |            |      | 4        |         | 0.14034                                 | 0.48047 | -0.32  | 0.21  | 0.01   | -0.01 | -0.10                 | -0.63 | 0.20919               | 0.72517 | 0.38     | 0.73  | 0.78                       | 0.41  | 0.14                  | 0.06  | 0.00  |   |                       |   |        |   |   |   |
| HILICpos_242.0785_2.86 | HILIC | pos        | 2.86            | 242.0785   |            |      | 4        |         | 0.40154                                 | 0.70963 | 0.12   | 0.80  | 0.35   | 0.21  | 0.15                  | 0.02  | 0.36164               | 0.83579 | 0.32     | 0.32  | 0.19                       | 0.37  | 0.12                  | 0.26  | 0.10  |   |                       |   |        |   |   |   |
| HILICpos_242.0786_2.93 | HILIC | pos        | 2.93            | 242.0786   |            |      | 4        |         | 0.62747                                 | 0.84235 | 0.12   | 0.07  | 0.28   | 0.09  | 0.63                  | 0.12  | 0.53826               | 0.91464 | 0.21     | 0.07  | 0.13                       | 0.66  | 0.36                  | 0.39  | -0.22 |   |                       |   |        |   |   |   |
| HILICneg_242.0803_6.26 | HILIC | neg        | 6.26            | 242.0803   |            |      | 4        |         | 0.00279                                 | 0.10921 | -0.32  | -0.20 | 0.15   | -0.30 | -0.03                 | -0.25 | 0.79704               | 0.96860 | -0.05    | -0.14 | -0.10                      | 0.16  | 0.18                  | 0.01  | -0.27 |   |                       |   |        |   |   |   |
| RPneg_242.17609_11.075 | RP    | neg        | 11.075          | 242.1761   |            |      | 4        |         | 0.21950                                 | 0.56150 | -0.45  | -0.20 | -0.17  | -0.04 | -0.41                 | -0.42 | 0.51302               | 0.90648 | 0.29     | 1.29  | -0.26                      | 0.68  | 0.08                  | 0.18  | 0.46  |   |                       |   |        |   |   |   |
| RPneg_242.1761_10.983  | RP    | neg        | 10.983          | 242.1761   |            |      | 4        |         | 0.65437                                 | 0.85467 | -0.21  | -0.22 | 0.29   | 0.09  | -0.41                 | -0.52 | 0.58054               | 0.92418 | 0.25     | 1.99  | -0.29                      | 0.54  | 0.04                  | 0.18  | 0.63  |   |                       |   |        |   |   |   |
| RPneg_242.17621_7.593  | RP    | neg        | 7.593           | 242.1762   |            |      | 4        |         | 0.03841                                 | 0.31618 | -0.65  | -0.16 | 0.02   | -0.25 | -0.53                 | -0.25 | 0.69196               | 0.95008 | 0.15     | 1.95  | -0.24                      | 0.78  | -0.13                 | 0.35  | 0.26  |   |                       |   |        |   |   |   |
| HILICneg_242.1766_0.46 | HILIC | neg        | 0.46            | 242.1766   |            |      | 4        |         | 0.07736                                 | 0.39850 | -0.48  | -0.20 | -0.22  | -0.33 | -0.44                 | -0.29 | 0.63019               | 0.93532 | 0.15     | 1.54  | -0.23                      | 0.77  | -0.13                 | 0.50  | 0.33  |   |                       |   |        |   |   |   |
| HILICneg_242.1768_0.38 | HILIC | neg        | 0.38            | 242.1768   |            |      | 4        |         | 0.22076                                 | 0.56313 | -0.31  | -0.16 | -0.07  | -0.13 | -0.29                 | -0.35 | 0.97708               | 0.99726 | -0.03    | 0.81  | -0.33                      | 0.17  | -0.19                 | 0.08  | 0.88  |   |                       |   |        |   |   |   |
| RPpos_242.211_10.97    | RP    | pos        | 10.97           | 242.2110   |            |      | 4        |         | 0.35858                                 | 0.67760 | -0.38  | -0.20 | -0.01  | 0.01  | -0.36                 | -0.47 | 0.63885               | 0.93638 | 0.21     | 1.40  | -0.27                      | 0.60  | -0.02                 | 0.08  | 0.58  |   |                       |   |        |   |   |   |
| RPneg_242.2114_11.06   | RP    | pos        | 11.06           | 242.2114   |            |      | 4        |         | 0.23138                                 | 0.57283 | -0.45  | -0.17 | 0.03   | -0.14 | -0.43                 | -0.41 | 0.15554               | 0.66190 | 0.62     | 1.33  | 0.32                       | 0.58  | 0.01                  | 0.19  | 0.59  |   |                       |   |        |   |   |   |
| RPneg_242.90971_1.904  | RP    | neg        | 1.904           | 242.9097   |            |      | 4        |         | 0.44348                                 | 0.73956 | 0.24   | 0.44  | 0.69   | 0.47  | 0.49                  | 0.15  | 0.60462               | 0.92896 | 0.15     | 0.09  | 0.01                       | 0.38  | 0.63                  | 0.36  | -0.08 |   |                       |   |        |   |   |   |
| RPneg_242.90985_5.238  | RP    | neg        | 5.238           | 242.9099   |            |      | 4        |         | 0.32242                                 | 0.64855 | -0.24  | -0.24 | -0.26  | -0.25 | -0.23                 | -0.31 | 0.21061               | 0.72715 | 0.62     | 0.83  | 0.68                       | 0.44  | 0.92                  | 0.45  | -0.15 |   |                       |   |        |   |   |   |
| RPneg_242.92857_2.842  | RP    | neg        | 2.842           | 242.9286   |            |      | 4        |         | 0.73316                                 | 0.89182 | 0.02   | 0.17  | 0.03   | 0.14  | 0.14                  | -0.04 | 0.13251               | 0.62867 | 0.94     | 0.86  | 0.86                       | 0.82  | 0.95                  | 1.03  | 0.79  |   |                       |   |        |   |   |   |
| RPneg_242.94359_13.095 | RP    | neg        | 13.095          | 242.9436   |            |      | 4        |         | 0.51988                                 | 0.78761 | -0.25  | -0.16 | -0.21  | 0.19  | 0.20                  | 0.59  | 0.63312               | 0.93546 | -0.08    | 0.02  | -0.10                      | -0.39 | 0.58                  | 0.14  | 0.74  |   |                       |   |        |   |   |   |
| RPneg_242.94382_10.64  | RP    | neg        | 10.64           | 242.9438   |            |      | 4        |         | 0.66994                                 | 0.86237 | -0.11  | -0.24 | -0.15  | 0.30  | 0.20                  | 0.18  | 0.93620               | 0.99003 | -0.01    | -0.18 | 0.42                       | -0.56 | 0.11                  | 0.31  | -0.49 |   |                       |   |        |   |   |   |
| RPneg_242.94385_10.522 | RP    | neg        | 10.522          | 242.9439   |            |      | 4        |         | 0.01718                                 | 0.24115 | -0.64  | 0.11  | -0.88  | -0.02 | -0.11                 | 0.37  | 0.94388               | 0.99197 | -0.07    | -0.06 | -0.29                      | -0.10 | 0.29                  | -0.70 | 0.50  |   |                       |   |        |   |   |   |
| HILICneg_242.9605_6.17 | HILIC | neg        | 6.17            | 242.9605   |            |      | 4        |         | 0.77203                                 | 0.91024 | 0.04   | 0.29  | 0.55   | 0.31  | 0.18                  | -0.16 | 0.04367               | 0.42056 | 0.26     | 0.57  | -0.03                      | 0.48  | 0.47                  | 0.27  | -0.10 |   |                       |   |        |   |   |   |
| HILICneg_242.9871_2.33 | HILIC | neg        | 2.33            | 242.9871   |            |      | 4        |         | 0.34734                                 | 0.66802 | -0.02  | 0.04  | 0.16   | 0.09  | 0.18                  | 0.07  | 0.61280               | 0.93086 | -0.06    | -0.22 | 0.11                       | -0.23 | 0.10                  | -0.03 | -0.15 |   |                       |   |        |   |   |   |
| RPneg_242.99628_4.557  | RP    | neg        | 4.557           | 242.9963   |            |      | 4        |         | 0.72093                                 | 0.88627 | -0.09  | -0.01 | 0.00   | -0.02 | -0.04                 | -0.32 | 0.07647               | 0.52148 | -0.44    | -0.44 | -0.45                      | -0.45 | -0.46                 | -0.44 | -0.48 |   |                       |   |        |   |   |   |
| HILICpos_243.0023_0.94 | HILIC | pos        | 0.94            | 243.0023   |            |      | 4        |         | 0.02847                                 | 0.28787 | -0.35  | -0.29 | -0.11  | -0.21 | -0.25                 | -0.28 | 0.03279               | 0.37254 | -0.34    | -0.30 | -0.42                      | -0.34 | -0.21                 | -0.32 | -0.22 |   |                       |   |        |   |   |   |
| HILICpos_243.0267_7.71 | HILIC | pos        | 7.71            | 243.0267   |            |      | 4        |         | 0.39009                                 | 0.70136 | -0.10  | 0.35  | 0.27   | -0.19 | -0.19                 | 0.23  | 0.62603               | 0.93454 | 0.03     | 0.22  | -0.05                      | 0.10  | -0.05                 | -0.04 | 0.14  |   |                       |   |        |   |   |   |
| RPneg_243.02797_2.81   | RP    | neg        | 2.81            | 243.0280   |            |      | 4        |         | 0.03052                                 | 0.29493 | -0.55  | -0.24 | -0.42  | -0.30 | -0.56                 | -0.25 | 0.42168               | 0.86946 | 0.20     | 0.05  | 0.20                       | 0.25  | 0.38                  | 0.31  | -0.23 |   |                       |   |        |   |   |   |
| RPneg_243.0331_5.597   | RP    | neg        | 5.597           | 243.0331   |            |      | 4        |         | 0.62182                                 | 0.83939 | -0.03  | 0.01  | -0.11  | 0.07  | -0.02                 | 0.30  | 0.08982               | 0.55360 | -0.35    | -0.30 | -0.31                      | -0.31 | -0.29                 | -0.26 | 0.38  |   |                       |   |        |   |   |   |
| RPneg_243.0336_5.396   | RP    | neg        | 5.396           | 243.0334   |            |      | 4        |         | 0.31351                                 | 0.64126 | 2.61   | 2.39  | 3.51   | 3.67  | 3.15                  | 0.07  | 0.11537               | 0.59932 | 0.69     | 0.53  | 0.73                       | 0.68  | 0.72                  | 0.70  | 0.44  |   |                       |   |        |   |   |   |
| RPneg_243.03343_3.661  | RP    | neg        | 3.661           | 243.0334   |            |      | 4        |         | 0.51970                                 | 0.78761 | 0.52   | 0.34  | 0.11   | 0.55  | 0.77                  | 1.75  | 0.48636               | 0.89761 | 0.58     | 0.21  | 0.54                       | 0.47  | 0.66                  | 0.51  | 0.60  |   |                       |   |        |   |   |   |
| HILICneg_243.0335_0.4  | HILIC | neg        | 0.4             | 243.0335   |            |      | 4        |         | 0.61330                                 | 0.83488 | 0.13   | -0.06 | 0.13   | 0.24  | 0.13                  | 1.00  | 0.87632               | 0.98219 | -0.03    | -0.10 | 0.06                       | -0.02 | 0.00                  | 0.01  | -0.27 |   |                       |   |        |   |   |   |
| HILICneg_243.0386_6.17 | HILIC | neg        | 6.17            | 243.0386   |            |      | 4        |         | 0.80579                                 | 0.92532 | -0.10  | 0.07  | 0.30   | 0.04  | 0.09                  | -0.16 | 0.02256               | 0.31745 | 0.30     | 0.49  | 0.32                       | 0.48  | 0.49                  | 0.13  | -0.01 |   |                       |   |        |   |   |   |
| RPpos_243.0529_2.82    | RP    | pos        | 2.82            | 243.0529   |            |      | 4        |         | 0.08461                                 | 0.41060 | -0.28  | 0.04  | 0.44   | -0.11 | -0.51                 | -0.81 | 0.03135               | 0.36797 | 0.67     | 0.37  | 0.42                       | 0.62  | 1.40                  | 0.42  | 0.05  |   |                       |   |        |   |   |   |
| HILICpos_243.0533_4.07 | HILIC | pos        | 4.07            | 243.0533   |            |      | 4        |         | 0.12481                                 | 0.46029 | -0.17  | 0.06  | 0.73   | -0.14 | -0.68                 | -0.54 | 0.73245               | 0.95803 | 0.03     | -0.05 | 0.21                       | 0.19  | 0.09                  | -0.04 | -0.46 |   |                       |   |        |   |   |   |
| RPneg_243.06204_1.306  | RP    | neg        | 1.306           | 243.0620   |            |      | 4        |         | 0.01620                                 | 0.23584 | -0.54  | -0.17 | -0.36  | -0.34 | -0.84                 | 0.03  | 0.02139               | 0.30918 | -0.49    | -0.67 | -0.08                      | 0.00  | -0.69                 | -0.77 | -0.31 |   |                       |   |        |   |   |   |
| RPneg_243.06242_1.229  | RP    | neg        | 1.229           | 243.0624   |            |      | 4        |         | 0.00415                                 | 0.13194 | -0.65  | -0.33 | -0.42  | -0.70 | -0.61                 | -0.35 | 0.00144               | 0.07124 | -0.67    | -0.36 | -0.17                      | -0.39 | -1.00                 | -1.14 | -0.73 |   |                       |   |        |   |   |   |
| HILICneg_243.064_1.35  | HILIC | neg        | 1.35            | 243.0640   |            |      | 4        |         | 0.38475                                 | 0.69734 | 0.26   | 0.35  | 0.36   | 0.27  | 0.42                  | 0.14  | 0.88951               | 0.98399 | -0.03    | -0.08 | -0.06                      | 0.03  | 0.01                  | -0.05 | -0.01 |   |                       |   |        |   |   |   |
| RPneg_243.06958_6.89   | RP    | neg        | 6.89            | 243.0696   |            |      | 4        |         | 0.63128                                 | 0.84836 | 0.09   | 0.19  | 0.36   | -0.02 | 0.63                  | -0.16 | 0.96097               | 0.99553 | 0.05     | -0.28 | 0.04                       | -0.05 | -0.01                 | 0.04  | 0.93  |   |                       |   |        |   |   |   |
| HILICneg_243.07_0.44   | HILIC | neg        | 0.44            | 243.0700   |            |      | 4        |         | 0.29109                                 | 0.62396 | 0.20   | 0.15  | 0.34   | -0.04 | 1.18                  | 0.09  | 0.88346               | 0.98281 | -0.05    | -0.34 | -0.15                      | -0.23 | 0.01                  | -0.02 | 0.82  |   |                       |   |        |   |   |   |
| RPneg_243.0775_4.966   | RP    | neg        | 4.966           | 243.0775   |            |      | 4        |         | 0.08294                                 | 0.40798 | 0.97   | 0.78  | 1.01   | 0.81  | 1.58                  | 0.21  | 0.95194               | 0.99379 | 0.06     | -0.04 | 0.03                       | 0.04  | 0.08                  | -0.07 | 0.31  |   |                       |   |        |   |   |   |
| RPpos_243.0883_5.91    | RP    | pos        | 5.91            | 243.0883   |            |      | 4        |         | 0.33373                                 | 0.65750 | 0.12   | 0.03  | 0.32   | 0.19  | 0.12                  | 0.11  | 0.30177               | 0.80313 | 0.03     | 0.11  | 0.03                       | 0.12  | -0.05                 | -0.04 | 0.26  |   |                       |   |        |   |   |   |
| RPpos_243.0996_8.39    | RP    | pos        | 8.39            | 243.0996   |            |      | 4        |         | 0.12116                                 | 0.45664 | 0.53   | 0.23  | 0.13   | 0.48  | 0.25                  | 0.44  | 0.34138               | 0.83671 | 0.41     | 0.74  | 1.21                       | 0.61  | 0.39                  | -0.05 | -0.13 |   |                       |   |        |   |   |   |
| HILICneg_243.1051_0.96 | HILIC | neg        | 0.96            | 243.1051   |            |      | 4        |         | 0.77237                                 | 0.91041 | 0.10   | 0.25  | 0.24   | 0.17  | 0.13                  | -0.24 | 0.14392               | 0.64609 | 1.67     | 1.54  | 1.68                       | 1.69  | 1.96                  | 1.55  | 1.37  |   |                       |   |        |   |   |   |
| HILICpos_243.1226_0.37 | HILIC | pos        | 0.37            | 243.1226   |            |      | 4        |         |                                         |         |        |       |        |       |                       |       |                       |         |          |       |                            |       |                       |       |       |   |                       |   |        |   |   |   |



| Feature_ID             | Mode  | Ionization | Average_Rt.min. | Average_Mz | Metabolite | MSMS | ID_Level | HMDB_ID | IV-Alcohol self-administration (IV-ASA) |       |        |       |        |       |                       |         |         |       |       |         | IV-Alcohol clamp (IV-AC)   |       |        |       |          |   |                       |   |        |   |   |  |
|------------------------|-------|------------|-----------------|------------|------------|------|----------|---------|-----------------------------------------|-------|--------|-------|--------|-------|-----------------------|---------|---------|-------|-------|---------|----------------------------|-------|--------|-------|----------|---|-----------------------|---|--------|---|---|--|
|                        |       |            |                 |            |            |      |          |         | Area Under the Curve (AUC)              |       |        |       |        |       | IV-Ghrelin or Placebo |         |         |       |       |         | Area Under the Curve (AUC) |       |        |       |          |   | IV-Ghrelin or Placebo |   |        |   |   |  |
|                        |       |            |                 |            |            |      |          |         | Baseline                                |       | IV-ASA |       | BrAC=0 |       | Baseline              |         | Post-LD |       | IV-AC |         | Post-AC                    |       | BrAC=0 |       | Baseline |   | IV-ASA                |   | BrAC=0 |   |   |  |
|                        |       |            |                 |            |            |      |          |         | p                                       | q     | d      | d     | d      | d     | p                     | q       | d       | d     | d     | d       | p                          | q     | d      | d     | d        | p | q                     | d | d      | d | d |  |
| HILICpos_244.1908_0.38 | HILIC | pos        | 0.38            | 244.1908   |            | 4    | 244.1908 | 0.43385 | 0.73261                                 | -0.30 | -0.14  | -0.07 | -0.06  | -0.08 | -0.50                 | 0.56894 | 0.92109 | 0.26  | 1.42  | -0.28   | 0.40                       | -0.02 | 0.22   | 0.49  |          |   |                       |   |        |   |   |  |
| RPpos_244.1908_11.05   | RP    | pos        | 11.05           | 244.1908   |            | 4    | 244.1908 | 0.19154 | 0.53693                                 | -0.48 | -0.16  | -0.07 | -0.15  | -0.47 | -0.44                 | 0.53740 | 0.91544 | 0.27  | 1.35  | -0.28   | 0.58                       | -0.01 | 0.20   | 0.56  |          |   |                       |   |        |   |   |  |
| RPpos_244.1912_7.59    | RP    | pos        | 7.59            | 244.1912   |            | 4    | 244.1912 | 0.03891 | 0.31780                                 | -0.73 | -0.13  | -0.03 | -0.35  | -0.48 | -0.19                 | 0.81448 | 0.97171 | 0.09  | 2.00  | -0.23   | 0.82                       | -0.26 | 0.33   | 0.28  |          |   |                       |   |        |   |   |  |
| RPpos_244.2057_6.51    | RP    | pos        | 6.51            | 244.2057   |            | 4    | 244.2057 | 0.34977 | 0.67007                                 | -0.37 | -0.02  | 0.63  | 0.24   | 0.54  | -0.50                 | 0.00099 | 0.05687 | -0.62 | -0.14 | -0.73   | -0.40                      | 0.13  | -0.71  | -0.54 |          |   |                       |   |        |   |   |  |
| RPpos_244.2272_7.71    | RP    | pos        | 8.71            | 244.2272   |            | 4    | 244.2272 | 0.24915 | 0.58856                                 | 0.38  | 0.29   | 0.12  | 0.33   | 0.63  | 0.57                  | 0.30186 | 0.80313 | 0.73  | 0.60  | 0.59    | 1.11                       | 0.16  | 0.39   | 0.20  |          |   |                       |   |        |   |   |  |
| RPpos_244.2272_8.81    | RP    | pos        | 8.81            | 244.2272   |            | 4    | 244.2272 | 0.24534 | 0.58617                                 | 0.36  | 0.21   | 0.11  | 0.37   | 0.90  | 0.52                  | 0.32045 | 0.81544 | 0.67  | 0.57  | 1.13    | 0.43                       | 0.45  | 0.43   | 0.25  |          |   |                       |   |        |   |   |  |
| RPneg_244.90715_5.238  | RP    | neg        | 5.238           | 244.9072   |            | 4    | 244.9072 | 0.25994 | 0.59802                                 | -0.22 | -0.25  | -0.19 | -0.22  | -0.21 | -0.29                 | 0.06149 | 0.48401 | 0.69  | 1.24  | 0.66    | 0.56                       | 0.40  | 0.69   | 0.01  |          |   |                       |   |        |   |   |  |
| RPneg_244.90804_6.836  | RP    | neg        | 6.836           | 244.9080   |            | 4    | 244.9080 | 0.16309 | 0.50787                                 | -0.10 | 0.08   | 0.08  | 0.06   | 0.12  | -0.33                 | 0.02436 | 0.32908 | 0.11  | 0.07  | 0.17    | 0.06                       | 0.13  | 0.11   | 0.08  |          |   |                       |   |        |   |   |  |
| HILICneg_244.9084_0.4  | HILIC | neg        | 0.4             | 244.9084   |            | 4    | 244.9084 | 0.26500 | 0.60158                                 | -0.15 | -0.03  | 0.05  | 0.00   | 0.12  | -0.43                 | 0.02555 | 0.33700 | 0.11  | 0.11  | 0.15    | 0.09                       | 0.09  | 0.10   | 0.09  |          |   |                       |   |        |   |   |  |
| HILICneg_244.9091_0.52 | HILIC | neg        | 0.52            | 244.9091   |            | 4    | 244.9091 | 0.02549 | 0.27911                                 | -0.17 | -0.20  | 0.16  | -0.07  | 0.01  | -0.15                 | 0.07710 | 0.52368 | 0.12  | -0.07 | 0.08    | 0.29                       | 0.14  | 0.15   | 0.07  |          |   |                       |   |        |   |   |  |
| RPneg_244.92523_2.842  | RP    | neg        | 2.842           | 244.9252   |            | 4    | 244.9252 | 0.75989 | 0.90495                                 | 0.04  | 0.17   | 0.07  | 0.14   | 0.17  | -0.08                 | 0.13174 | 0.62676 | 0.89  | 0.87  | 0.84    | 0.74                       | 0.93  | 0.92   | 0.81  |          |   |                       |   |        |   |   |  |
| HILICneg_244.9631_6.22 | HILIC | neg        | 6.22            | 244.9631   |            | 4    | 244.9631 | 0.77429 | 0.91097                                 | -0.04 | 0.34   | 0.58  | 0.10   | -0.13 | -0.63                 | 0.10117 | 0.57331 | 0.65  | 0.53  | 0.76    | 1.12                       | 0.27  | 0.13   | -0.31 |          |   |                       |   |        |   |   |  |
| RPneg_244.99799_1.907  | RP    | neg        | 1.907           | 244.9980   |            | 4    | 244.9980 | 0.41072 | 0.71588                                 | 0.21  | 0.43   | 0.72  | 0.61   | 0.60  | -0.05                 | 0.38449 | 0.84935 | 0.22  | 0.26  | 0.05    | 0.09                       | 0.69  | 0.46   | 0.03  |          |   |                       |   |        |   |   |  |
| HILICpos_244.998_0.67  | HILIC | pos        | 0.67            | 244.9980   |            | 4    | 244.9980 | 0.05548 | 0.35743                                 | 0.49  | 0.24   | 0.60  | 1.17   | 0.43  | 0.06                  | 0.00610 | 0.16487 | 1.25  | 0.42  | 0.69    | 0.90                       | 1.23  | 2.05   | 0.48  |          |   |                       |   |        |   |   |  |
| HILICpos_244.998_0.72  | HILIC | pos        | 0.72            | 244.9980   |            | 4    | 244.9980 | 0.13468 | 0.47388                                 | 0.45  | 0.27   | 0.11  | 0.25   | 1.46  | 0.00                  | 0.45797 | 0.88460 | 1.50  | 0.38  | 1.40    | 3.08                       | 0.29  | 0.27   | 0.86  |          |   |                       |   |        |   |   |  |
| RPneg_245.01225_4.827  | RP    | neg        | 4.827           | 245.0123   |            | 4    | 245.0123 | 0.32549 | 0.65113                                 | -0.20 | -0.14  | -0.14 | -0.16  | -0.13 | -0.26                 | 0.53244 | 0.91290 | -0.18 | 0.35  | 0.37    | 0.41                       | 0.39  | 0.30   | -0.30 |          |   |                       |   |        |   |   |  |
| HILICneg_245.0123_0.42 | HILIC | neg        | 0.42            | 245.0123   |            | 4    | 245.0123 | 0.21586 | 0.55806                                 | 0.26  | 0.08   | 0.30  | 0.19   | 0.35  | 0.16                  | 0.66787 | 0.94452 | -0.15 | 0.36  | -0.04   | -0.16                      | -0.14 | -0.12  | -0.22 |          |   |                       |   |        |   |   |  |
| RPneg_245.01233_4.696  | RP    | neg        | 4.696           | 245.0123   |            | 4    | 245.0123 | 0.05638 | 0.35895                                 | 0.30  | 0.24   | 0.33  | 0.21   | 0.22  | 1.26                  | 0.62554 | 0.93416 | -0.17 | 0.05  | -0.13   | -0.22                      | -0.19 | -0.17  | -0.07 |          |   |                       |   |        |   |   |  |
| RPneg_245.01236_3.117  | RP    | neg        | 3.117           | 245.0124   |            | 4    | 245.0124 | 0.20187 | 0.54681                                 | 0.36  | 0.12   | 0.35  | 0.43   | 0.50  | 0.13                  | 0.57852 | 0.94718 | -0.07 | -0.21 | -0.02   | 0.04                       | 0.39  | -0.02  | 0.22  |          |   |                       |   |        |   |   |  |
| HILICneg_245.0384_0.3  | HILIC | neg        | 6.3             | 245.0384   |            | 4    | 245.0384 | 0.84671 | 0.94268                                 | 0.03  | 0.01   | 0.51  | 0.09   | 0.08  | -0.38                 | 0.63214 | 0.37090 | 0.41  | 0.66  | 0.50    | 1.06                       | 0.24  | -0.04  | -0.88 |          |   |                       |   |        |   |   |  |
| HILICneg_245.0437_4.92 | HILIC | neg        | 4.92            | 245.0437   |            | 4    | 245.0437 | 0.25470 | 0.59313                                 | -0.08 | -0.08  | 0.17  | -0.12  | 0.04  | 0.48                  | 0.47440 | 0.89262 | -0.18 | -0.33 | -0.12   | 0.04                       | -0.17 | -0.07  | -0.30 |          |   |                       |   |        |   |   |  |
| HILICneg_245.0439_5.43 | HILIC | neg        | 5.43            | 245.0439   |            | 4    | 245.0439 | 0.23542 | 0.57717                                 | -0.11 | -0.03  | 0.16  | -0.06  | -0.06 | -0.27                 | 0.61369 | 0.93135 | -0.01 | 0.05  | 0.06    | 0.01                       | -0.03 | -0.11  | 0.11  |          |   |                       |   |        |   |   |  |
| RPneg_245.04846_5.186  | RP    | neg        | 5.186           | 245.0485   |            | 4    | 245.0485 | 0.60285 | 0.83046                                 | 0.17  | 0.11   | 0.37  | 0.60   | 0.15  | 0.39                  | 0.83059 | 0.97473 | 0.04  | -0.11 | 0.02    | 0.18                       | 0.17  | 0.10   | -0.11 |          |   |                       |   |        |   |   |  |
| HILICneg_245.0486_0.5  | HILIC | neg        | 0.5             | 245.0486   |            | 4    | 245.0486 | 0.80628 | 0.92567                                 | 0.07  | 0.04   | 0.25  | 0.56   | 0.07  | 0.21                  | 0.81613 | 0.97211 | 0.05  | -0.13 | 0.01    | 0.19                       | 0.20  | 0.15   | -0.15 |          |   |                       |   |        |   |   |  |
| RPneg_245.04875_3.845  | RP    | neg        | 3.845           | 245.0488   |            | 4    | 245.0488 | 0.57371 | 0.81586                                 | -0.11 | 0.00   | -0.15 | -0.05  | -0.07 | 0.33                  | 0.07756 | 0.52475 | -0.51 | -0.47 | -0.51   | -0.45                      | -0.50 | -0.47  | -0.26 |          |   |                       |   |        |   |   |  |
| RPneg_245.04912_4.825  | RP    | neg        | 4.825           | 245.0491   |            | 4    | 245.0491 | 0.18805 | 0.53403                                 | -0.27 | -0.25  | -0.24 | -0.09  | -0.23 | -0.26                 | 0.11585 | 0.59984 | -0.33 | -0.31 | -0.29   | -0.31                      | -0.30 | -0.32  | -0.29 |          |   |                       |   |        |   |   |  |
| RPpos_245.0502_1.61    | RP    | pos        | 1.61            | 245.0502   |            | 4    | 245.0502 | 0.55757 | 0.80831                                 | 0.14  | 0.04   | 0.12  | 0.21   | 0.51  | 0.04                  | 0.06364 | 0.48965 | 0.57  | 0.34  | 0.19    | 0.33                       | 0.67  | 0.57   | 0.91  |          |   |                       |   |        |   |   |  |
| HILICpos_245.0628_5.63 | HILIC | pos        | 5.63            | 245.0628   |            | 4    | 245.0628 | 0.25733 | 0.59543                                 | 0.24  | 0.04   | 1.01  | 0.34   | 0.24  | -0.24                 | 0.06568 | 0.49518 | 0.51  | 0.38  | 0.77    | 1.00                       | 0.41  | 0.00   | 0.08  |          |   |                       |   |        |   |   |  |
| HILICneg_245.0674_0.97 | HILIC | neg        | 0.97            | 245.0674   |            | 4    | 245.0674 | 0.02872 | 0.28894                                 | 0.64  | 0.42   | 0.37  | 0.70   | 1.47  | -0.08                 | 0.49246 | 0.89839 | 0.07  | -0.09 | 0.21    | 0.05                       | -0.01 | 0.33   | 0.00  |          |   |                       |   |        |   |   |  |
| HILICneg_245.078_1.59  | HILIC | neg        | 1.59            | 245.0780   |            | 4    | 245.0780 | 0.52027 | 0.78772                                 | -0.05 | 0.11   | 0.38  | 0.10   | 0.20  | -0.14                 | 0.32352 | 0.81679 | -0.26 | -0.16 | -0.07   | -0.21                      | -0.01 | -0.37  | -0.41 |          |   |                       |   |        |   |   |  |
| RPneg_245.0822_6.589   | RP    | neg        | 6.589           | 245.0822   |            | 4    | 245.0822 | 0.30978 | 0.63825                                 | -0.25 | -0.24  | -0.25 | -0.27  | -0.25 | -0.29                 | 0.34179 | 0.82691 | 1.26  | 1.17  | 1.23    | 1.17                       | 1.31  | 1.34   | 1.42  |          |   |                       |   |        |   |   |  |
| RPneg_245.09346_4.832  | RP    | neg        | 4.832           | 245.0935   |            | 4    | 245.0935 | 0.91853 | 0.97036                                 | 0.05  | 0.34   | 0.43  | 0.31   | 0.11  | -0.55                 | 0.56626 | 0.92078 | 0.08  | -0.06 | 0.03    | 0.01                       | 0.26  | 0.26   | -0.08 |          |   |                       |   |        |   |   |  |
| HILICpos_245.0941_0.89 | HILIC | pos        | 0.89            | 245.0949   |            | 4    | 245.0949 | 0.96174 | 0.98629                                 | 0.00  | 0.51   | 0.43  | 0.30   | 0.42  | -0.39                 | 0.33889 | 0.89074 | 0.91  | -0.09 | 0.02    | 0.04                       | 0.39  | -0.07  | -0.42 |          |   |                       |   |        |   |   |  |
| HILICneg_245.1028_2.33 | HILIC | neg        | 2.33            | 245.1028   |            | 4    | 245.1028 | 0.23423 | 0.57578                                 | -0.07 | -0.03  | 0.12  | 0.35   | 0.08  | 0.15                  | 0.97636 | 0.99711 | -0.04 | -0.15 | -0.49   | 0.10                       | 0.28  | -0.12  | -0.12 |          |   |                       |   |        |   |   |  |
| HILICneg_245.103_4.33  | HILIC | neg        | 4.33            | 245.1030   |            | 4    | 245.1030 | 0.14912 | 0.49169                                 | 0.46  | -0.24  | 1.28  | 0.66   | 0.50  | -0.35                 | 0.30067 | 0.80244 | 0.31  | 0.27  | 0.14    | 0.70                       | 0.10  | -0.62  | 0.07  |          |   |                       |   |        |   |   |  |
| RPneg_245.10304_11.544 | RP    | neg        | 11.544          | 245.1030   |            | 4    | 245.1030 | 0.27194 | 0.60797                                 | -0.29 | -0.27  | 0.32  | 0.07   | -0.09 | 0.62                  | 0.98283 | 0.99758 | 0.01  | -0.20 | -0.11   | -0.03                      | -0.26 | 0.33   | 0.76  |          |   |                       |   |        |   |   |  |
| RPneg_245.11429_2.082  | RP    | neg        | 2.082           | 245.1143   |            | 4    | 245.1143 | 0.56847 | 0.81331                                 | 0.22  | 0.36   | 0.60  | 0.17   | 0.37  | -0.35                 | 0.40901 | 0.86241 | 0.18  | 0.05  | -0.06   | 0.45                       | 0.21  | 0.43   | -0.22 |          |   |                       |   |        |   |   |  |
| HILICneg_245.1145_6.16 | HILIC | neg        | 6.16            | 245.1145   |            | 4    | 245.1145 | 0.55875 | 0.80871                                 | 0.18  | 0.26   | 0.49  | 0.17   | 0.31  | -0.34                 | 0.52482 | 0.90985 | 0.16  | 0.14  | 0.25    | 0.30                       | 0.28  | 0.20   | -0.34 |          |   |                       |   |        |   |   |  |
| HILICpos_245.1288_1.38 | HILIC | pos        | 1.38            | 245.1288   |            | 4    | 245.1288 | 0.67160 | 0.86333                                 | -0.26 | -0.16  | -0.15 | -0.27  | -0.25 | 0.00                  | 0.30935 | 0.80799 | 0.04  | -0.01 | -0.01   | 0.07                       | 0.02  | 0.13   | -0.08 |          |   |                       |   |        |   |   |  |
| RPneg_245.12988_2.942  | RP    | neg        | 2.942           | 245.1299   |            | 4    | 245.1299 | 0.88534 | 0.95758                                 | -0.23 | -0.16  | -0.10 | -0.21  | -0.25 | -0.12                 | 0.31064 | 0.80868 | 0.04  | -0.01 | 0.02    | 0.16                       | 0.04  | -0.01  | -0.03 |          |   |                       |   |        |   |   |  |
| HILICneg_245.13_1.44   | HILIC | neg        | 1.44            | 245.1300   |            | 4    | 245.1300 | 0.64479 | 0.84966                                 | -0.23 | -0.16  | -0.11 | -0.15  | -0.28 | 0.01                  | 0.29287 | 0.79688 | 0.07  | 0.05  | 0.06    | 0.09                       | 0.05  | 0.06   | 0.02  |          |   |                       |   |        |   |   |  |
| RPneg_245.13943_6.949  | RP    | neg        | 6.949           | 245.1394   |            | 4    | 245.1394 | 0.55891 | 0.80883                                 | -0.24 | -0.24  | 0.11  | 0.59   | 0.44  | -0.57                 | 0.74964 | 0.96150 | 0.09  | 0.04  | -0.09   | 0.48                       | 0.03  | 0.02   | 0.21  |          |   |                       |   |        |   |   |  |
| HILICpos_245.1608_4.97 | HILIC | pos        | 4.97            | 245.1608   |            | 4    | 245.1608 | 0.72268 | 0.88677                                 | 0.17  | 0.25   | 0.30  | 0.25   | 0.29  | -0.16                 | 0.77489 | 0.96469 | -0.09 | -0.08 | -0.10</ |                            |       |        |       |          |   |                       |   |        |   |   |  |

| Feature_ID             | Mode  | Ionization | Average_Rt.min. | Average_Mz | Metabolite | MSMS | ID_Level | HMDB_ID | IV-Alcohol self-administration (IV-ASA) |         |       |        |       |       |                       |       |         |         |       |       |                            | IV-Alcohol clamp (IV-AC) |       |         |       |   |                       |   |   |         |   |   |  |  |
|------------------------|-------|------------|-----------------|------------|------------|------|----------|---------|-----------------------------------------|---------|-------|--------|-------|-------|-----------------------|-------|---------|---------|-------|-------|----------------------------|--------------------------|-------|---------|-------|---|-----------------------|---|---|---------|---|---|--|--|
|                        |       |            |                 |            |            |      |          |         | Area Under the Curve (AUC)              |         |       |        |       |       | IV-Ghrelin or Placebo |       |         |         |       |       | Area Under the Curve (AUC) |                          |       |         |       |   | IV-Ghrelin or Placebo |   |   |         |   |   |  |  |
|                        |       |            |                 |            |            |      |          |         | Baseline                                |         |       | IV-ASA |       |       | Ghrelin               |       |         | Placebo |       |       | Baseline                   |                          |       | Post-LD |       |   | Ghrelin               |   |   | Placebo |   |   |  |  |
|                        |       |            |                 |            |            |      |          |         | p                                       | q       | d     | d      | d     | d     | d                     | d     | d       | d       | d     | d     | p                          | q                        | d     | d       | d     | d | d                     | d | d | d       | d | d |  |  |
| RPneg_246.992_2.412    | RP    | neg        | 2.412           | 246.992    |            |      | 4        |         | 0.60890                                 | 0.83311 | -0.04 | -0.15  | 0.01  | 0.11  | 0.02                  | 0.14  | 0.21095 | 0.72774 | -0.18 | -0.36 | -0.16                      | 0.06                     | 0.02  | -0.10   | -0.33 |   |                       |   |   |         |   |   |  |  |
| RPneg_247.01372_2.845  | RP    | neg        | 2.845           | 247.0137   |            |      | 4        |         | 0.73647                                 | 0.89353 | 0.03  | 0.17   | 0.09  | 0.11  | 0.18                  | -0.07 | 0.12902 | 0.62181 | 0.98  | 0.52  | 1.20                       | 0.98                     | 0.86  | 0.88    | 0.95  |   |                       |   |   |         |   |   |  |  |
| RPneg_247.02827_2.955  | RP    | neg        | 2.955           | 247.0283   |            |      | 4        |         | 0.28167                                 | 0.61578 | 0.94  | 0.17   | 0.30  | 0.45  | 0.40                  | 0.21  | 0.06361 | 0.48965 | -0.17 | 0.33  | 0.34                       | 0.32                     | 0.17  | 0.13    | -0.09 |   |                       |   |   |         |   |   |  |  |
| HILICneg_247.0407_4.92 | HILIC | neg        | 4.92            | 247.0407   |            |      | 4        |         | 0.11890                                 | 0.45511 | -0.15 | -0.03  | 0.12  | -0.09 | -0.11                 | 0.20  | 0.61481 | 0.93144 | -0.12 | -0.28 | 0.10                       | -0.06                    | -0.14 | -0.04   | -0.45 |   |                       |   |   |         |   |   |  |  |
| HILICneg_247.0409_5.43 | HILIC | neg        | 5.43            | 247.0409   |            |      | 4        |         | 0.11890                                 | 0.45511 | -0.15 | -0.03  | 0.12  | -0.09 | -0.11                 | 0.20  | 0.61481 | 0.93144 | -0.12 | -0.28 | 0.10                       | -0.06                    | -0.14 | -0.04   | -0.45 |   |                       |   |   |         |   |   |  |  |
| RPneg_247.04459_5.186  | RP    | neg        | 5.186           | 247.0446   |            |      | 4        |         | 0.61174                                 | 0.83397 | -0.17 | 0.13   | 0.37  | 0.58  | 0.14                  | 0.40  | 0.82505 | 0.67319 | 0.05  | 0.11  | 0.03                       | 0.18                     | 0.17  | 0.11    | -0.10 |   |                       |   |   |         |   |   |  |  |
| HILICneg_247.0448_0.5  | HILIC | neg        | 0.5             | 247.0448   |            |      | 4        |         | 0.78731                                 | 0.91650 | 0.08  | 0.03   | 0.31  | 0.52  | 0.07                  | 0.17  | 0.91021 | 0.98698 | 0.02  | -0.06 | 0.05                       | 0.08                     | 0.08  | 0.14    | -0.15 |   |                       |   |   |         |   |   |  |  |
| HILICneg_247.0504_3.4  | HILIC | pos        | 3.4             | 247.0504   |            |      | 4        |         | 0.14566                                 | 0.48651 | 0.04  | -0.06  | 0.01  | 0.24  | 0.20                  | -0.32 | 0.48177 | 0.89519 | 0.18  | 0.07  | 0.35                       | 0.04                     | 0.09  | 0.28    | 0.09  |   |                       |   |   |         |   |   |  |  |
| HILICpos_247.0579_2.34 | HILIC | pos        | 2.34            | 247.0579   |            |      | 4        |         | 0.19671                                 | 0.54132 | 0.41  | 0.11   | 0.51  | 0.70  | 0.93                  | 0.05  | 0.92645 | 0.98921 | 0.02  | -0.05 | 0.04                       | 0.05                     | 0.02  | -0.06   | -0.12 |   |                       |   |   |         |   |   |  |  |
| HILICpos_247.0919_5.71 | HILIC | pos        | 5.71            | 247.0919   |            |      | 4        |         | 0.08406                                 | 0.40971 | -0.03 | -0.02  | 0.19  | 0.02  | 0.02                  | -0.01 | 0.45612 | 0.88432 | -0.24 | -0.29 | -0.28                      | -0.10                    | -0.25 | -0.19   | -0.31 |   |                       |   |   |         |   |   |  |  |
| HILICpos_247.0938_0.55 | HILIC | pos        | 0.55            | 247.0938   |            |      | 4        |         | 0.58349                                 | 0.82044 | 0.17  | 0.39   | 0.37  | 0.38  | 0.23                  | -0.14 | 0.72139 | 0.95590 | -0.15 | -0.13 | -0.15                      | -0.01                    | 0.21  | -0.48   | 0.77  |   |                       |   |   |         |   |   |  |  |
| HILICneg_247.0999_1.22 | HILIC | neg        | 1.22            | 247.0999   |            |      | 4        |         | 0.45743                                 | 0.74917 | 0.24  | 0.26   | 0.37  | 0.44  | 0.75                  | -0.30 | 0.68242 | 0.94835 | 0.14  | 0.24  | 0.32                       | 0.07                     | -0.02 | 0.41    | 0.18  |   |                       |   |   |         |   |   |  |  |
| HILICpos_247.1078_1.88 | HILIC | pos        | 1.88            | 247.1078   |            |      | 4        |         | 0.00457                                 | 0.13604 | 0.57  | 0.42   | 0.66  | 0.61  | 0.55                  | 1.02  | 0.45930 | 0.88492 | 0.23  | 0.30  | 0.08                       | 0.15                     | 0.23  | 0.33    | 0.65  |   |                       |   |   |         |   |   |  |  |
| HILICpos_247.1289_6.1  | HILIC | pos        | 6.1             | 247.1289   |            |      | 4        |         | 0.45221                                 | 0.74541 | 0.24  | 0.25   | 0.71  | 0.37  | 0.18                  | -0.40 | 0.26907 | 0.78122 | 0.24  | 0.19  | 0.42                       | 0.55                     | 0.28  | 0.10    | -0.23 |   |                       |   |   |         |   |   |  |  |
| RPpos_247.1291_2.09    | RP    | pos        | 2.09            | 247.1291   |            |      | 4        |         | 0.89778                                 | 0.96266 | 0.05  | 0.23   | 0.45  | 0.01  | 0.16                  | -0.21 | 0.25646 | 0.77190 | 0.17  | 0.16  | 0.36                       | 0.08                     | 0.07  | 0.28    | 0.05  |   |                       |   |   |         |   |   |  |  |
| RPpos_247.1333_7.14    | RP    | pos        | 7.14            | 247.1333   |            |      | 4        |         | 0.00111                                 | 0.06712 | 0.51  | 0.64   | 0.69  | 0.80  | 0.53                  | 0.64  | 0.22450 | 0.74134 | -0.50 | -0.49 | -0.58                      | -0.39                    | -0.57 | -0.21   | -0.54 |   |                       |   |   |         |   |   |  |  |
| HILICpos_247.1361_5.12 | HILIC | pos        | 5.12            | 247.1361   |            |      | 4        |         | 0.03160                                 | 0.29800 | -0.49 | 0.19   | -0.47 | 0.01  | -0.32                 | -0.62 | 0.03528 | 0.38399 | -0.43 | -0.29 | -0.36                      | 0.95                     | -0.09 | 0.02    | -0.05 |   |                       |   |   |         |   |   |  |  |
| HILICpos_247.1401_7.08 | HILIC | pos        | 7.08            | 247.1401   |            |      | 4        |         | 0.52567                                 | 0.79104 | 0.13  | 0.12   | 0.51  | -0.15 | 0.29                  | -0.44 | 0.39914 | 0.85782 | 0.13  | 0.27  | 0.16                       | 0.60                     | 0.26  | -0.40   | -0.45 |   |                       |   |   |         |   |   |  |  |
| HILICpos_247.1402_5.63 | HILIC | pos        | 5.63            | 247.1402   |            |      | 4        |         | 0.07554                                 | 0.39513 | 0.42  | 0.33   | 1.11  | 0.64  | 0.37                  | -0.26 | 0.00894 | 0.20091 | 0.69  | 0.49  | 0.77                       | 0.40                     | 0.69  | 0.72    | -0.12 |   |                       |   |   |         |   |   |  |  |
| RPpos_247.1437_1.39    | RP    | pos        | 1.39            | 247.1437   |            |      | 4        |         | 0.90931                                 | 0.96639 | 0.23  | -0.16  | -0.09 | -0.20 | 0.24                  | -0.08 | 0.27412 | 0.78439 | 0.06  | 0.00  | 0.03                       | 0.14                     | 0.06  | 0.06    | -0.06 |   |                       |   |   |         |   |   |  |  |
| RPpos_247.144_2.95     | RP    | pos        | 2.95            | 247.1440   |            |      | 4        |         | 0.95657                                 | 0.98781 | -0.23 | -0.15  | -0.11 | -0.20 | -0.24                 | -0.07 | 0.31671 | 0.81306 | 0.02  | 0.02  | 0.00                       | 0.09                     | 0.08  | 0.08    | -0.37 |   |                       |   |   |         |   |   |  |  |
| HILICpos_247.1651_5.77 | HILIC | pos        | 5.77            | 247.1651   |            |      | 4        |         | 0.19451                                 | 0.53972 | 0.17  | 0.01   | 0.43  | 0.22  | 0.21                  | -0.30 | 0.14266 | 0.64525 | 1.45  | 1.32  | 1.38                       | 1.65                     | 1.66  | 1.43    | 0.81  |   |                       |   |   |         |   |   |  |  |
| RPneg_247.1703_9.11    | RP    | neg        | 9.11            | 247.1703   |            |      | 4        |         | 0.06590                                 | 0.37771 | -0.48 | -0.10  | -0.18 | 0.11  | -0.15                 | -0.37 | 0.38850 | 0.85113 | 0.16  | 0.15  | 0.03                       | 0.19                     | 0.00  | 0.44    | 0.21  |   |                       |   |   |         |   |   |  |  |
| HILICneg_247.8095_0.58 | HILIC | neg        | 0.58            | 247.8095   |            |      | 4        |         | 0.90419                                 | 0.96465 | -0.06 | -0.43  | -0.08 | 0.69  | 0.00                  | -0.35 | 0.67143 | 0.94576 | 0.32  | -0.11 | 0.07                       | 0.02                     | 0.38  | 0.06    | 0.10  |   |                       |   |   |         |   |   |  |  |
| HILICneg_247.8095_4.38 | HILIC | neg        | 4.38            | 247.8095   |            |      | 4        |         | 0.01675                                 | 0.23877 | -0.61 | -0.16  | -0.31 | 0.07  | -0.01                 | 0.14  | 0.45867 | 0.88479 | -0.03 | -0.26 | -0.28                      | 0.04                     | -0.03 | 0.34    | 0.20  |   |                       |   |   |         |   |   |  |  |
| HILICneg_247.8097_3.12 | HILIC | neg        | 3.12            | 247.8097   |            |      | 4        |         | 0.01164                                 | 0.20755 | -1.00 | -0.23  | -0.25 | -0.89 | -0.33                 | 0.39  | 0.89542 | 0.98465 | 0.04  | 0.01  | -0.26                      | -0.29                    | 0.39  | 0.13    | 0.36  |   |                       |   |   |         |   |   |  |  |
| HILICneg_247.8097_4.28 | HILIC | neg        | 4.28            | 247.8097   |            |      | 4        |         | 0.25218                                 | 0.59103 | -0.36 | -0.11  | 0.20  | 0.40  | -0.50                 | -0.16 | 0.68978 | 0.94980 | 0.14  | -0.07 | 0.33                       | -0.56                    | -0.24 | 0.37    | 0.57  |   |                       |   |   |         |   |   |  |  |
| HILICneg_247.8923_0.92 | HILIC | neg        | 0.92            | 247.8923   |            |      | 4        |         | 0.04004                                 | 0.32039 | -0.36 | -0.31  | -0.29 | -0.27 | -0.37                 | -0.20 | 0.05372 | 0.45934 | -0.39 | -0.37 | -0.40                      | -0.44                    | -0.32 | -0.38   | -0.19 |   |                       |   |   |         |   |   |  |  |
| HILICpos_247.9342_0.95 | HILIC | pos        | 0.95            | 247.9342   |            |      | 4        |         | 0.38331                                 | 0.69665 | -0.29 | 0.15   | 0.16  | 0.03  | -0.02                 | 0.00  | 0.70881 | 0.95262 | -0.08 | -0.06 | -0.35                      | 0.01                     | 0.07  | -0.18   | 0.23  |   |                       |   |   |         |   |   |  |  |
| HILICneg_247.9622_0.73 | HILIC | neg        | 0.73            | 247.9622   |            |      | 4        |         | 0.29272                                 | 0.62497 | 0.29  | 0.10   | 0.06  | 0.19  | 1.06                  | 0.08  | 0.74504 | 0.96070 | 0.26  | -0.03 | 0.19                       | 1.28                     | 0.05  | -0.67   | 0.41  |   |                       |   |   |         |   |   |  |  |
| RPneg_247.9624_1.461   | RP    | neg        | 1.461           | 247.9624   |            |      | 4        |         | 0.29887                                 | 0.62868 | 0.26  | -0.07  | 0.42  | 0.61  | 0.54                  | -0.03 | 0.04847 | 0.43981 | 0.59  | 0.38  | 0.21                       | 0.87                     | 0.72  | 0.43    | 0.39  |   |                       |   |   |         |   |   |  |  |
| RPneg_247.9625_1.049   | RP    | neg        | 1.049           | 247.9627   |            |      | 4        |         | 0.60533                                 | 0.83171 | 0.09  | 0.23   | 0.13  | 0.22  | 0.36                  | 0.05  | 0.19303 | 0.70820 | 0.45  | 0.14  | 0.32                       | 0.23                     | 0.36  | 0.39    | 1.13  |   |                       |   |   |         |   |   |  |  |
| RPneg_247.9625_1.95    | RP    | neg        | 1.95            | 247.9627   |            |      | 4        |         | 0.79995                                 | 0.92270 | 0.05  | -0.13  | 0.05  | 0.20  | 0.38                  | -0.07 | 0.16472 | 0.67499 | 0.42  | 0.14  | 0.20                       | 0.27                     | 0.32  | 0.46    | -0.16 |   |                       |   |   |         |   |   |  |  |
| RPneg_247.9628_1.36    | RP    | neg        | 1.36            | 247.9629   |            |      | 4        |         | 0.21695                                 | 0.55882 | 0.34  | -0.10  | 0.07  | 0.41  | 1.09                  | 0.30  | 0.57697 | 0.92304 | 0.56  | -0.02 | 0.54                       | 1.96                     | 2.38  | -0.17   | 0.57  |   |                       |   |   |         |   |   |  |  |
| RPpos_247.9652_7.41    | RP    | pos        | 7.41            | 247.9652   |            |      | 4        |         | 0.87819                                 | 0.95444 | 0.05  | 0.05   | 0.21  | 0.22  | 0.29                  | 0.14  | 0.03408 | 0.37841 | 0.06  | -0.08 | 0.04                       | 0.04                     | 0.18  | 0.13    | -0.04 |   |                       |   |   |         |   |   |  |  |
| HILICpos_248.0089_5.8  | HILIC | pos        | 5.8             | 248.0089   |            |      | 4        |         | 0.65396                                 | 0.85451 | 0.19  | 0.26   | 0.67  | 0.32  | 0.03                  | -0.57 | 0.03839 | 0.39930 | 1.03  | 0.53  | 0.83                       | 0.99                     | 0.86  | 0.96    | 0.55  |   |                       |   |   |         |   |   |  |  |
| HILICneg_248.0208_5.5  | HILIC | neg        | 5.5             | 248.0208   |            |      | 4        |         | 0.67674                                 | 0.86574 | -0.14 | 0.18   | 0.40  | 0.01  | -0.19                 | -0.33 | 0.52203 | 0.90888 | -0.27 | -0.36 | -0.33                      | -0.09                    | -0.01 | -0.38   | -0.49 |   |                       |   |   |         |   |   |  |  |
| HILICneg_248.0209_6.41 | HILIC | neg        | 6.41            | 248.0209   |            |      | 4        |         | 0.13845                                 | 0.47792 | -0.30 | 0.22   | -0.07 | 0.06  | -0.10                 | -0.75 | 0.40589 | 0.86031 | 0.28  | 0.67  | 0.53                       | 0.57                     | -0.19 | -0.07   | -0.07 |   |                       |   |   |         |   |   |  |  |
| RPpos_248.0348_3.28    | RP    | pos        | 3.28            | 248.0348   |            |      | 4        |         | 0.13070                                 | 0.46770 | 0.40  | 0.07   | 0.98  | 0.84  | 0.91                  | 0.25  | 0.01156 | 0.22902 | 0.67  | 0.02  | 0.54                       | 2.23                     | 2.30  | 0.14    | -0.01 |   |                       |   |   |         |   |   |  |  |
| HILICneg_248.0401_1.14 | HILIC | neg        | 1.14            | 248.0401   |            |      | 4        |         | 0.80624                                 | 0.92567 | 0.02  | 0.16   | 0.54  | -0.22 | 0.05                  | 1.11  | 0.28814 | 0.79407 | 0.58  | 0.15  | 0.07                       | 1.57                     | 0.33  | 0.98    | -0.11 |   |                       |   |   |         |   |   |  |  |
| RPneg_248.05348_1.197  | RP    | neg        | 1.197           | 248.0535   |            |      | 4        |         | 0.39088                                 | 0.70197 | 0.23  | 0.58   | 1.17  | 0.56  | 0.07                  | -0.59 | 0.09020 | 0.55371 | 0.56  | 0.27  | 0.85                       | 1.28                     | 0.92  | 0.29    | -0.33 |   |                       |   |   |         |   |   |  |  |
| HILICneg_248.0541_5.17 | HILIC | neg        | 5.17            | 248.0541   |            |      | 4        |         | 0.37256                                 | 0.68842 | 0.26  | 0.10   | 1.03  | 0.60  | 0.19                  | -0.11 | 0.04730 | 0.43442 | 0.64  | 0.48  | 0.73                       | 1.25                     | 0.76  | 0.33    | 0.12  |   |                       |   |   |         |   |   |  |  |
| HILICpos_248.0586_2.25 | HILIC | pos        | 2.25            | 248.0586   |            |      | 4        |         | 0.35706                                 | 0.67621 | -0.19 | -0.09  | -0.13 | -0.23 | -0.15                 | -0.46 | 0.49793 | 0.90072 | -0.17 | -0.01 | -0.06                      | -0.20                    | -0.20 | -0.27   | -0.47 |   |                       |   |   |         |   |   |  |  |
| RPneg_248.06001_3.284  | RP    | neg        | 3.284           | 248.0600   |            |      | 4        |         | 0.14237                                 | 0.48216 | -0.17 | -0.14  | -0.18 | -0.14 | -0.18                 | -0.08 |         |         |       |       |                            |                          |       |         |       |   |                       |   |   |         |   |   |  |  |

| Feature_ID             | Mode  | Ionization | Average_Rt.min. | Average_Mz | Metabolite | MSMS | ID_Level | HMDB_ID | IV-Alcohol self-administration (IV-ASA) |         |       |       |       |                       |        |        |          |         | IV-Alcohol clamp (IV-AC)   |       |       |       |       |                       |          |         |       |         |
|------------------------|-------|------------|-----------------|------------|------------|------|----------|---------|-----------------------------------------|---------|-------|-------|-------|-----------------------|--------|--------|----------|---------|----------------------------|-------|-------|-------|-------|-----------------------|----------|---------|-------|---------|
|                        |       |            |                 |            |            |      |          |         | Area Under the Curve (AUC)              |         |       |       |       | IV-Ghrelin or Placebo |        |        |          |         | Area Under the Curve (AUC) |       |       |       |       | IV-Ghrelin or Placebo |          |         |       |         |
|                        |       |            |                 |            |            |      |          |         | p                                       | q       | d     | d     | d     | Baseline              | IV-ASA | BrAc=0 | Baseline | Post-LD | IV-AC                      | p     | q     | d     | d     | d                     | Baseline | Post-LD | IV-AC | Post-AC |
| HILICneg_249.8084_1.4  | HILIC | neg        | 1.4             | 249.8084   |            |      | 4        |         | 0.71382                                 | 0.88345 | -0.21 | -0.27 | 0.04  | 0.64                  | 0.24   | 0.51   | 0.00881  | 0.20018 | 0.28                       | 0.27  | 0.33  | 0.18  | 0.00  | 0.41                  | 0.17     |         |       |         |
| RPneg_249.84343_10.523 | RP    | neg        | 10.523          | 249.8434   |            |      | 4        |         | 0.47870                                 | 0.76318 | 0.11  | 0.30  | 0.24  | 0.34                  | 0.17   | 0.27   | 0.23618  | 0.75417 | 0.11                       | 0.24  | 0.09  | -0.08 | 0.06  | 0.17                  | 0.21     |         |       |         |
| HILICneg_249.8488_0.92 | HILIC | neg        | 0.92            | 249.8488   |            |      | 4        |         | 0.04397                                 | 0.33333 | -0.33 | -0.31 | -0.25 | -0.32                 | -0.32  | -0.20  | 0.05786  | 0.47329 | -0.39                      | -0.41 | -0.35 | -0.43 | -0.33 | -0.40                 | -0.27    |         |       |         |
| HILICneg_249.9203_4.92 | HILIC | neg        | 4.92            | 249.9203   |            |      | 4        |         | 0.28960                                 | 0.62282 | 0.31  | 0.12  | 1.11  | 0.60                  | 0.28   | 0.16   | 0.00999  | 0.21203 | 0.37                       | 0.31  | 0.57  | 0.76  | 0.68  | -0.18                 | -0.30    |         |       |         |
| HILICneg_249.9604_0.88 | HILIC | neg        | 0.88            | 249.9604   |            |      | 4        |         | 0.14295                                 | 0.66453 | 0.21  | 0.21  | 1.08  | 0.62                  | -0.11  | -0.11  | 0.08770  | 0.54659 | 0.42                       | 0.44  | 0.47  | 0.13  | 0.68  | 0.25                  | -0.14    |         |       |         |
| HILICneg_249.9886_0.92 | HILIC | neg        | 0.92            | 249.9886   |            |      | 4        |         | 0.79604                                 | 0.91810 | 0.05  | 0.10  | 0.38  | 0.21                  | 0.16   | 0.25   | 0.20109  | 0.30    | 0.30                       | 0.30  | 0.10  | 0.71  | 0.76  | 0.15                  | -0.52    |         |       |         |
| RPpos_250.0133_2.86    | RP    | pos        | 2.86            | 250.0133   |            |      | 4        |         | 0.74082                                 | 0.89599 | 0.04  | 0.14  | 0.17  | 0.18                  | 0.17   | -0.08  | 0.13498  | 0.63255 | 0.83                       | 0.63  | 0.62  | 1.07  | 0.95  | 0.75                  | 0.45     |         |       |         |
| HILICneg_250.0194_2.11 | HILIC | neg        | 2.11            | 250.0194   |            |      | 4        |         | 0.28109                                 | 0.61533 | -0.17 | 0.06  | 0.27  | -0.10                 | 0.06   | 0.09   | 0.08584  | 0.54277 | -0.41                      | 0.07  | -0.78 | -0.32 | 0.17  | -0.56                 | -0.25    |         |       |         |
| HILICneg_250.0213_5.62 | HILIC | neg        | 5.62            | 250.0213   |            |      | 4        |         | 0.18472                                 | 0.53107 | -0.31 | -0.12 | 0.06  | -0.17                 | -0.29  | -0.16  | 0.05713  | 0.47024 | -0.15                      | -0.12 | -0.12 | 0.25  | -0.31 | -0.22                 | -0.67    |         |       |         |
| RPneg_250.07216_4.018  | RP    | neg        | 4.018           | 250.0722   |            |      | 4        |         | 0.79921                                 | 0.92255 | -0.02 | -0.09 | 0.15  | 0.13                  | -0.06  | -0.37  | 0.42726  | 0.87209 | -0.17                      | -0.32 | -0.27 | -0.14 | -0.12 | -0.02                 | -0.26    |         |       |         |
| RPneg_250.07227_7.408  | RP    | neg        | 7.408           | 250.0723   |            |      | 4        |         | 0.15616                                 | 0.49515 | -0.37 | -0.49 | -0.23 | -0.10                 | -0.16  | 0.34   | 0.27878  | 0.78818 | 0.14                       | 0.33  | -0.06 | 0.44  | -0.16 | 0.08                  | 0.64     |         |       |         |
| RPneg_250.08316_5.04   | RP    | neg        | 5.04            | 250.0832   |            |      | 4        |         | 0.86938                                 | 0.95109 | -0.01 | 0.15  | 0.24  | 0.03                  | 0.17   | -0.41  | 0.65001  | 0.93932 | 0.35                       | 0.30  | 0.52  | 0.60  | 0.62  | 0.01                  | 0.17     |         |       |         |
| RPneg_250.10857_6.865  | RP    | neg        | 6.865           | 250.1086   |            |      | 4        |         | 0.04037                                 | 0.32140 | 0.04  | 0.03  | 0.30  | 0.04                  | 0.11   | -0.29  | 0.50834  | 0.90402 | 0.71                       | 0.75  | 0.90  | 0.76  | 0.56  | 0.71                  | 0.56     |         |       |         |
| RPpos_250.177_11.07    | RP    | pos        | 11.07           | 250.1770   |            |      | 4        |         | 0.17906                                 | 0.52435 | -0.49 | -0.16 | -0.08 | -0.19                 | -0.41  | -0.42  | 0.52189  | 0.90888 | 0.28                       | 1.26  | -0.34 | 0.60  | 0.00  | 0.22                  | 0.67     |         |       |         |
| RPpos_250.1777_7.68    | RP    | pos        | 7.68            | 250.1777   |            |      | 4        |         | 0.16108                                 | 0.50461 | -0.39 | -0.02 | -0.07 | -0.30                 | -0.33  | 0.02   | 0.70860  | 0.95262 | 0.13                       | 1.70  | -0.20 | 0.92  | -0.15 | 0.67                  | -0.27    |         |       |         |
| RPpos_250.1778_10.97   | RP    | pos        | 10.97           | 250.1778   |            |      | 4        |         | 0.25440                                 | 0.59296 | -0.47 | -0.18 | -0.05 | -0.07                 | -0.40  | -0.57  | 0.61693  | 0.93229 | 0.23                       | 1.50  | -0.31 | 0.39  | 0.06  | 0.11                  | 0.68     |         |       |         |
| HILICneg_250.1787_1.45 | HILIC | neg        | 1.45            | 250.1787   |            |      | 4        |         | 0.71080                                 | 0.88198 | -0.10 | 0.48  | 0.14  | 0.12                  | 0.10   | 0.66   | 0.36902  | 0.84015 | -0.06                      | -0.23 | -0.02 | -0.10 | 0.07  | -0.19                 | 0.32     |         |       |         |
| HILICneg_250.8919_0.92 | HILIC | neg        | 0.92            | 250.8919   |            |      | 4        |         | 0.10865                                 | 0.44211 | -0.33 | -0.38 | -0.29 | -0.28                 | -0.36  | -0.21  | 0.08770  | 0.54659 | -0.42                      | -0.01 | -0.43 | -0.44 | -0.35 | -0.41                 | -0.28    |         |       |         |
| RPneg_250.8988_6.836   | RP    | neg        | 6.836           | 250.8988   |            |      | 4        |         | 0.21693                                 | 0.55882 | -0.08 | 0.06  | 0.08  | 0.08                  | 0.13   | -0.33  | 0.03181  | 0.36986 | 0.10                       | 0.01  | 0.15  | 0.09  | 0.07  | 0.07                  | 0.07     |         |       |         |
| RPneg_250.90181_4.677  | RP    | neg        | 4.677           | 250.9018   |            |      | 4        |         | 0.31310                                 | 0.64115 | 2.76  | 2.36  | 3.04  | 2.52                  | 2.75   | 3.98   | 0.27015  | 0.78219 | 1.58                       | 1.54  | 1.62  | 1.53  | 1.55  | 1.73                  | 1.48     |         |       |         |
| HILICneg_250.9025_0.4  | HILIC | neg        | 0.4             | 250.9025   |            |      | 4        |         | 0.34912                                 | 0.66975 | 1.35  | -0.18 | -0.20 | 2.28                  | 2.71   | -0.42  | 0.35909  | 0.83442 | 0.74                       | 1.03  | 0.24  | -0.29 | 1.06  | 1.19                  | 1.25     |         |       |         |
| RPneg_250.92256_2.842  | RP    | neg        | 2.842           | 250.9226   |            |      | 4        |         | 0.81134                                 | 0.92776 | 0.06  | 0.15  | 0.22  | 0.18                  | 0.18   | -0.14  | 0.07664  | 0.52208 | 0.80                       | 0.89  | 0.62  | 0.69  | 0.94  | 0.59                  | 0.63     |         |       |         |
| HILICneg_250.9229_1.76 | HILIC | neg        | 1.76            | 250.9229   |            |      | 4        |         | 0.21193                                 | 0.55465 | -0.30 | 0.01  | -0.07 | -0.39                 | -0.01  | -0.08  | 0.44742  | 0.88074 | -0.24                      | 0.20  | 0.01  | 0.35  | -0.30 | -0.15                 | -0.27    |         |       |         |
| HILICneg_250.9485_1.42 | HILIC | neg        | 1.42            | 250.9485   |            |      | 4        |         | 0.59794                                 | 0.82775 | -0.19 | -0.10 | 0.23  | -0.28                 | -0.08  | 2.54   | 0.29612  | 0.79892 | 0.33                       | 0.10  | -0.09 | 0.75  | 0.59  | 0.65                  | -0.17    |         |       |         |
| HILICneg_250.9816_5.4  | HILIC | neg        | 5.4             | 250.9816   |            |      | 4        |         | 0.00109                                 | 0.06696 | -1.01 | -2.16 | -0.21 | -0.84                 | 0.20   | -0.22  | 0.06256  | 0.48642 | -1.35                      | -0.35 | -0.83 | -1.00 | -0.21 | -0.34                 | -0.49    |         |       |         |
| HILICneg_250.9817_4.21 | HILIC | neg        | 4.21            | 250.9817   |            |      | 4        |         | 0.09878                                 | 0.42947 | -0.42 | 0.13  | 1.02  | 0.06                  | -1.24  | -0.58  | 0.48277  | 0.89601 | -0.46                      | -0.49 | -0.17 | 1.00  | -0.42 | -1.49                 | -0.12    |         |       |         |
| HILICpos_250.9861_0.94 | HILIC | pos        | 0.94            | 250.9861   |            |      | 4        |         | 0.92343                                 | 0.97251 | -0.05 | 0.15  | 0.33  | 0.24                  | 0.18   | -0.43  | 0.02490  | 0.33219 | -0.29                      | -0.33 | -0.44 | -0.28 | -0.18 | -0.13                 | -0.51    |         |       |         |
| HILICneg_251.0052_6.29 | HILIC | neg        | 6.29            | 251.0052   |            |      | 4        |         | 0.88664                                 | 0.95842 | 0.06  | 0.27  | 0.73  | 0.46                  | -0.13  | -0.75  | 0.00734  | 0.18073 | 0.53                       | 0.68  | 0.66  | 1.08  | 0.22  | -0.09                 | -0.54    |         |       |         |
| HILICneg_251.0153_1.05 | HILIC | neg        | 1.05            | 251.0153   |            |      | 4        |         | 0.37615                                 | 0.69119 | -0.17 | 0.11  | 0.11  | 0.25                  | 0.19   | -0.16  | 0.86985  | 0.98059 | 0.00                       | 0.52  | -0.47 | -0.64 | 0.36  | 0.03                  | 1.80     |         |       |         |
| HILICneg_251.0285_1.09 | HILIC | neg        | 1.09            | 251.0285   |            |      | 4        |         | 0.05222                                 | 0.34975 | -0.18 | 0.12  | -0.01 | -0.09                 | -0.17  | -0.37  | 0.10873  | 0.58854 | -0.09                      | 0.40  | 0.14  | -0.56 | -0.08 | -0.12                 | -0.10    |         |       |         |
| HILICpos_251.0368_5.33 | HILIC | pos        | 5.33            | 251.0368   |            |      | 4        |         | 0.29696                                 | 0.62784 | 0.31  | 0.53  | 0.51  | 0.29                  | 0.44   | 0.41   | 0.04013  | 0.40805 | 0.20                       | 0.09  | 0.22  | 0.38  | 0.12  | 0.49                  | -0.49    |         |       |         |
| HILICneg_251.0383_0.44 | HILIC | neg        | 0.44            | 251.0383   |            |      | 4        |         | 0.50470                                 | 0.77921 | -0.10 | -0.18 | -0.08 | -0.11                 | -0.11  | 0.39   | 0.34425  | 0.82805 | 0.00                       | -0.08 | -0.03 | -0.04 | 0.12  | 0.04                  | 0.04     |         |       |         |
| RPneg_251.0385_6.904   | RP    | neg        | 6.904           | 251.0385   |            |      | 4        |         | 0.94952                                 | 0.98123 | 0.05  | -0.01 | 0.03  | -0.05                 | 0.03   | 0.49   | 0.11151  | 0.83176 | 0.02                       | 0.02  | 0.06  | -0.01 | 0.05  | 0.08                  | -0.04    |         |       |         |
| RPneg_251.03857_6.771  | RP    | neg        | 6.771           | 251.0386   |            |      | 4        |         | 0.13633                                 | 0.47623 | 0.38  | 0.09  | 0.06  | 0.28                  | 0.71   | 1.95   | 0.31157  | 0.80947 | 0.06                       | 0.13  | 0.03  | 0.04  | 0.05  | -0.17                 | 0.76     |         |       |         |
| HILICneg_251.0921_5.69 | HILIC | neg        | 5.69            | 251.0921   |            |      | 4        |         | 0.90438                                 | 0.96474 | 0.02  | 0.04  | 0.77  | 0.49                  | -0.03  | -0.60  | 0.05695  | 0.46970 | 0.42                       | 0.34  | 0.57  | 0.65  | 0.46  | 0.44                  | -0.47    |         |       |         |
| HILICneg_251.0923_1.25 | HILIC | neg        | 1.25            | 251.0923   |            |      | 4        |         | 0.00086                                 | 0.05908 | -0.55 | 0.11  | -0.17 | -0.37                 | -0.24  | -0.46  | 0.96167  | 0.99553 | 0.08                       | 0.27  | 0.18  | -0.17 | -0.21 | 0.39                  | -0.17    |         |       |         |
| HILICpos_251.0974_5.11 | HILIC | pos        | 5.11            | 251.0974   |            |      | 4        |         | 0.29491                                 | 0.62651 | 0.24  | 0.43  | 0.99  | 0.44                  | 0.15   | 0.13   | 0.43172  | 0.87439 | 0.18                       | -0.08 | 0.32  | 0.50  | 0.22  | 0.01                  | -0.22    |         |       |         |
| RPpos_251.1025_2.83    | RP    | pos        | 2.83            | 251.1025   |            |      | 4        |         | 0.69030                                 | 0.87267 | -0.04 | 0.27  | 0.70  | 0.34                  | -0.31  | -0.18  | 0.88168  | 0.98281 | -0.05                      | 0.44  | 0.27  | 0.00  | -0.16 | -0.24                 | -0.29    |         |       |         |
| HILICneg_251.1038_5.49 | HILIC | neg        | 5.49            | 251.1038   |            |      | 4        |         | 0.97219                                 | 0.98974 | -0.11 | -0.38 | -0.32 | -0.34                 | 0.67   | 1.07   | 0.36897  | 0.84009 | 0.06                       | -0.19 | 0.34  | -0.14 | -0.28 | 0.01                  | 0.79     |         |       |         |
| RPneg_251.10405_1.818  | RP    | neg        | 1.818           | 251.1041   |            |      | 4        |         | 0.90573                                 | 0.96548 | -0.14 | -0.37 | -0.35 | -0.33                 | 0.59   | 1.07   | 0.44522  | 0.88012 | 0.07                       | -0.10 | 0.37  | -0.17 | -0.31 | 0.00                  | 0.84     |         |       |         |
| RPneg_251.11395_3.078  | RP    | neg        | 3.078           | 251.1140   |            |      | 4        |         | 0.43010                                 | 0.73046 | 0.23  | 0.02  | 0.46  | 0.52                  | 0.93   | 0.05   | 0.84508  | 0.97699 | 0.05                       | -0.01 | 0.12  | 0.01  | 0.18  | -0.14                 | -0.17    |         |       |         |
| RPpos_251.1282_8.76    | RP    | pos        | 8.76            | 251.1282   |            |      | 4        |         | 0.24675                                 | 0.58731 | -0.18 | -0.15 | -0.06 | -0.21                 | 0.11   | 0.03   | 0.20917  | 0.72517 | 0.15                       | 0.17  | 0.18  | 0.08  | 0.15  | 0.14                  | 0.24     |         |       |         |
| HILICneg_251.1287_0.47 | HILIC | neg        | 0.47            | 251.1287   |            |      | 4        |         | 0.38159                                 | 0.69536 | 0.19  | 0.06  | 0.33  | 0.27                  | 0.48   | -0.28  | 0.48747  | 0.89788 | 0.03                       | -0.17 | 0.05  | 0.25  | -0.05 | 0.04                  | -0.04    |         |       |         |
| RPneg_251.12903_7.899  | RP    | neg        | 7.899           | 251.1290   |            |      | 4        |         | 0.92346                                 | 0.97251 | 0.01  | 0.12  | 0.12  | 0.34                  | 0.31   | -0.33  | 0.71913  | 0.95532 | -0.11                      | -0.13 | -0.15 | -0.15 | -0.04 | -0.08                 | -0.13    |         |       |         |
| HILICneg_251.1295_0.61 | HILIC | neg        | 0.61            | 251.1295   |            |      | 4        |         | 0.20824                                 | 0.55125 | 0.34  | 0.60  | 0.57  | 0.39                  | 0.56   | -0.41  | 0.41583  | 0.86587 | 0.24                       | 0.24  | 0.21  | 0.30  | 0.36  | 0.18                  | 0.10     |         |       |         |
| HILICpos_251.1362_4.35 | HILIC | pos        | 4.35            | 251.1362   |            |      | 4        |         | 0.82683                                 | 0.93452 | 0.11  | 0.52  | 0.19  | 0.05                  | 0.43   | -0.25  | 0.59224  | 0.92666 | -0.29                      | 0.18  | -0.30 | -0.33 | 0.26  | -0.20                 | -0.47    |         |       |         |
| RPneg_251.17674_7.028  | RP    | neg        | 7.028           | 251.1767   |            |      | 4        |         | 0.13905                                 | 0.47855 |       |       |       |                       |        |        |          |         |                            |       |       |       |       |                       |          |         |       |         |

| Feature_ID             | Mode  | Ionization | Average Rt.min. | Average Mz | Metabolite | MSMS | ID_Level | HMDB_ID  | IV-Alcohol self-administration (IV-ASA) |         |       |                       |            |       |       |        |         |                            | IV-Alcohol clamp (IV-AC) |          |                       |            |       |       |        |   |   |  |
|------------------------|-------|------------|-----------------|------------|------------|------|----------|----------|-----------------------------------------|---------|-------|-----------------------|------------|-------|-------|--------|---------|----------------------------|--------------------------|----------|-----------------------|------------|-------|-------|--------|---|---|--|
|                        |       |            |                 |            |            |      |          |          | Area Under the Curve (AUC)              |         |       | IV-Ghrelin or Placebo |            |       |       |        |         | Area Under the Curve (AUC) |                          |          | IV-Ghrelin or Placebo |            |       |       |        |   |   |  |
|                        |       |            |                 |            |            |      |          |          | p                                       | q       | d     | Baseline              | IV-Ghrelin |       |       | BrAc=0 | p       | q                          | d                        | Baseline | Post-LD               | IV-Ghrelin |       |       | BrAc=0 |   |   |  |
|                        |       |            |                 |            |            |      |          |          |                                         |         |       |                       | d          | d     | d     |        |         |                            |                          |          |                       | d          | d     | d     |        | d | d |  |
| HILICpos_253.1049_1.42 | HILIC | pos        | 1.42            | 253.1049   |            |      | 4        | 253.1049 | 0.65028                                 | 0.85227 | -0.10 | 0.14                  | -0.14      | 0.30  | 0.09  | -0.64  | 0.01216 | 0.23564                    | -0.30                    | 0.18     | -0.42                 | -0.43      | -0.34 | -0.09 | -0.12  |   |   |  |
| RPneg_253.10558_7.875  | RP    | neg        | 7.875           | 253.1056   |            |      | 4        | 253.1056 | 0.02886                                 | 0.28906 | 0.52  | 0.06                  | 0.95       | 0.83  | 0.42  | 0.28   | 0.00019 | 0.01968                    | 0.64                     | 0.08     | 0.46                  | 1.20       | 0.62  | 0.61  | 0.12   |   |   |  |
| RPneg_253.10809_8.292  | RP    | neg        | 8.292           | 253.1081   |            |      | 4        | 253.1081 | 0.05635                                 | 0.35895 | 0.23  | 0.15                  | 0.34       | 0.19  | 0.44  | 0.43   | 0.53717 | 0.91447                    | 0.15                     | 0.27     | 0.07                  | 0.07       | 0.11  | 0.15  | 0.28   |   |   |  |
| RPneg_253.1084_7.117   | RP    | neg        | 7.117           | 253.1084   |            |      | 4        | 253.1084 | 0.78727                                 | 0.91650 | 0.19  | 0.32                  | 0.35       | 0.30  | 0.73  | -0.40  | 0.42502 | 0.87066                    | 0.37                     | 0.30     | 0.19                  | 0.25       | 0.56  | 0.38  | 0.25   |   |   |  |
| HILICpos_253.1183_5.44 | HILIC | pos        | 5.44            | 253.1183   |            |      | 4        | 253.1183 | 0.96233                                 | 0.98640 | -0.13 | -0.38                 | -0.33      | -0.33 | 0.61  | 1.06   | 0.43447 | 0.87383                    | 0.04                     | -0.11    | 0.39                  | -0.26      | -0.34 | 0.00  | -0.82  |   |   |  |
| RPpos_253.1185_3.88    | RP    | pos        | 3.88            | 253.1185   |            |      | 4        | 253.1185 | 0.56613                                 | 0.98789 | 0.12  | -0.39                 | -0.36      | -0.34 | 0.66  | 1.08   | 0.38279 | 0.88456                    | 0.07                     | -0.20    | 0.40                  | -0.23      | -0.40 | 0.00  | 0.90   |   |   |  |
| RPneg_253.11914_2.094  | RP    | neg        | 2.094           | 253.1191   |            |      | 4        | 253.1191 | 0.48853                                 | 0.77028 | -0.21 | 0.11                  | 0.26       | -0.19 | -0.39 | 0.06   | 0.76898 | 0.96454                    | -0.14                    | -0.21    | 0.02                  | 0.27       | -0.10 | -0.67 | -0.01  |   |   |  |
| RPneg_253.11919_2.648  | RP    | neg        | 2.648           | 253.1192   |            |      | 4        | 253.1192 | 0.71111                                 | 0.88209 | -0.14 | -0.10                 | 0.35       | 0.08  | -0.44 | 0.06   | 0.52042 | 0.90888                    | -0.17                    | -0.43    | -0.18                 | -0.18      | -0.10 | -0.28 | -0.37  |   |   |  |
| HILICpos_253.1277_2.11 | HILIC | pos        | 2.11            | 253.1277   |            |      | 4        | 253.1277 | 0.26662                                 | 0.60291 | 0.34  | 0.05                  | 0.55       | 0.57  | 0.90  | -0.01  | 0.84310 | 0.97663                    | 0.05                     | 0.01     | 0.09                  | 0.02       | 0.14  | -0.07 | -0.14  |   |   |  |
| RPpos_253.1284_2.76    | RP    | pos        | 2.76            | 253.1284   |            |      | 4        | 253.1284 | 0.54613                                 | 0.80141 | 0.20  | -0.08                 | 0.33       | 0.58  | 0.60  | -0.26  | 0.92465 | 0.98905                    | 0.01                     | 0.15     | -0.09                 | -0.04      | 0.36  | -0.35 | -0.28  |   |   |  |
| RPpos_253.1284_3.09    | RP    | pos        | 3.09            | 253.1284   |            |      | 4        | 253.1284 | 0.54223                                 | 0.79904 | 0.17  | 0.07                  | 0.52       | 0.34  | 0.83  | -0.15  | 0.88579 | 0.98286                    | 0.02                     | 0.05     | 0.14                  | -0.04      | 0.03  | -0.12 | -0.18  |   |   |  |
| RPneg_253.13464_11.756 | RP    | neg        | 11.756          | 253.1346   |            |      | 4        | 253.1346 | 0.92438                                 | 0.97276 | 0.26  | 0.54                  | 0.08       | 0.32  | 0.49  | -0.09  | 0.23125 | 0.74808                    | 0.53                     | 0.69     | 0.39                  | 0.51       | 0.53  | 0.34  | -0.34  |   |   |  |
| RPneg_253.13516_6.816  | RP    | neg        | 6.816           | 253.1352   |            |      | 4        | 253.1352 | 0.30436                                 | 0.63364 | 0.58  | 0.58                  | 1.09       | 0.62  | 0.88  | -0.30  | 0.08217 | 0.53444                    | 0.89                     | 1.19     | 0.95                  | 1.42       | 0.71  | 0.55  | 0.32   |   |   |  |
| RPneg_253.14421_13.183 | RP    | neg        | 13.183          | 253.1442   |            |      | 4        | 253.1442 | 0.05938                                 | 0.36509 | -0.48 | 0.39                  | -0.48      | -0.47 | 0.15  | -0.26  | 0.07224 | 0.51271                    | -0.15                    | 0.15     | -0.04                 | -0.46      | -0.42 | 0.03  | -0.21  |   |   |  |
| RPneg_253.14441_5.427  | RP    | neg        | 5.427           | 253.1444   |            |      | 4        | 253.1444 | 0.27323                                 | 0.60920 | -0.38 | -0.63                 | -0.25      | 0.31  | -0.17 | -0.20  | 0.70814 | 0.95262                    | 0.03                     | -0.01    | 0.00                  | 0.15       | 0.13  | 0.01  | 0.06   |   |   |  |
| HILICpos_253.1548_0.76 | HILIC | pos        | 0.76            | 253.1548   |            |      | 4        | 253.1548 | 0.82598                                 | 0.93416 | 0.02  | 0.44                  | 1.11       | 0.05  | 0.20  | 0.31   | 0.19285 | 0.70820                    | -0.28                    | -0.19    | 0.03                  | -0.30      | -0.02 | -0.24 | -0.58  |   |   |  |
| HILICpos_253.1646_0.56 | HILIC | pos        | 0.56            | 253.1646   |            |      | 4        | 253.1646 | 0.78074                                 | 0.91419 | -0.10 | 0.20                  | 0.34       | 0.13  | 0.05  | -0.14  | 0.87524 | 0.98217                    | -0.08                    | -0.24    | 0.02                  | 0.09       | 0.13  | -0.39 | 0.98   |   |   |  |
| RPneg_253.21735_10.761 | RP    | neg        | 10.761          | 253.2174   |            |      | 4        | 253.2174 | 0.00554                                 | 0.14617 | 1.23  | -0.02                 | 0.26       | 0.79  | 2.99  | -0.37  | 0.90184 | 0.98571                    | 0.02                     | -0.11    | 0.70                  | -0.26      | 0.13  | -0.39 | -0.11  |   |   |  |
| RPpos_253.6312_9.86    | RP    | pos        | 9.86            | 253.6312   |            |      | 4        | 253.6312 | 0.09382                                 | 0.42301 | -0.38 | -0.14                 | -0.09      | -0.29 | -0.19 | -0.20  | 0.22188 | 0.73839                    | -0.37                    | -0.28    | -0.36                 | -0.49      | -0.28 | -0.48 | -0.28  |   |   |  |
| HILICneg_253.8269_0.54 | HILIC | neg        | 0.54            | 253.8269   |            |      | 4        | 253.8269 | 0.75031                                 | 0.90553 | -0.17 | 0.21                  | -0.29      | 0.47  | 0.04  | 0.54   | 0.93235 | 0.98984                    | 0.05                     | 0.06     | 0.18                  | 0.46       | 0.48  | -0.75 | -0.18  |   |   |  |
| HILICneg_253.827_3.88  | HILIC | neg        | 3.88            | 253.8270   |            |      | 4        | 253.8270 | 0.41520                                 | 0.71949 | -0.23 | -0.35                 | -0.21      | -0.04 | 0.04  | 0.06   | 0.89175 | 0.98433                    | 0.15                     | 0.09     | -0.30                 | -0.04      | 0.85  | -0.08 | 0.11   |   |   |  |
| HILICneg_253.8272_3.35 | HILIC | neg        | 3.35            | 253.8272   |            |      | 4        | 253.8272 | 0.10272                                 | 0.43541 | -0.66 | 0.00                  | -0.15      | -0.86 | -0.49 | 0.28   | 0.04278 | 0.41699                    | -0.17                    | -0.19    | -0.16                 | -0.32      | -0.52 | -0.32 | -0.08  |   |   |  |
| HILICneg_253.9085_4.33 | HILIC | neg        | 4.33            | 253.9085   |            |      | 4        | 253.9085 | 0.81924                                 | 0.93123 | -0.04 | 0.13                  | 0.42       | 0.12  | -0.04 | 0.08   | 0.00008 | 0.01031                    | 0.56                     | 0.42     | 0.50                  | 0.78       | 0.70  | 0.43  | 0.05   |   |   |  |
| HILICneg_253.915_5.85  | HILIC | neg        | 5.85            | 253.9150   |            |      | 4        | 253.9150 | 0.86683                                 | 0.95014 | 0.10  | 0.33                  | 0.66       | 0.22  | 0.15  | -0.58  | 0.02791 | 0.34917                    | 1.04                     | 0.77     | 1.04                  | 1.22       | 0.92  | 0.81  | 0.04   |   |   |  |
| HILICneg_253.9584_6.98 | HILIC | neg        | 6.98            | 253.9584   |            |      | 4        | 253.9584 | 0.42982                                 | 0.73026 | 0.19  | 0.18                  | 0.64       | 0.46  | 0.02  | -0.54  | 0.01888 | 0.29205                    | 0.46                     | 0.74     | 0.51                  | 0.70       | 0.53  | 0.09  | -0.52  |   |   |  |
| RPneg_253.96439_6.839  | RP    | neg        | 6.839           | 253.9644   |            |      | 4        | 253.9644 | 0.39211                                 | 0.70265 | -0.04 | 0.06                  | -0.06      | -0.02 | 0.20  | -0.16  | 0.33875 | 0.82468                    | -0.18                    | -0.21    | -0.06                 | -0.28      | -0.14 | -0.20 | -0.08  |   |   |  |
| HILICneg_254.0257_5.85 | HILIC | neg        | 5.85            | 254.0257   |            |      | 4        | 254.0257 | 0.59505                                 | 0.99821 | 0.07  | 0.43                  | 0.78       | 0.28  | 0.10  | -0.61  | 0.05127 | 0.45143                    | 1.04                     | 0.88     | 1.08                  | 1.16       | 0.68  | 0.80  | -0.01  |   |   |  |
| HILICneg_254.039_3.33  | HILIC | neg        | 3.33            | 254.0390   |            |      | 4        | 254.0390 | 0.50807                                 | 0.78121 | -0.21 | 0.02                  | -0.19      | -0.34 | 0.04  | -0.11  | 0.09600 | 0.56530                    | -0.30                    | 0.06     | -0.28                 | 0.07       | -0.42 | -0.31 | -0.34  |   |   |  |
| HILICneg_254.08_1.06   | HILIC | neg        | 1.06            | 254.0800   |            |      | 4        | 254.0800 | 0.05798                                 | 0.36246 | 0.27  | 0.02                  | 0.86       | 0.41  | 0.57  | -0.44  | 0.21457 | 0.73110                    | 0.53                     | 0.27     | 0.93                  | 0.66       | 0.47  | 0.34  | -0.03  |   |   |  |
| HILICpos_254.1175_1.42 | HILIC | pos        | 1.42            | 254.1175   |            |      | 4        | 254.1175 | 0.18370                                 | 0.52989 | -0.18 | -0.09                 | -0.15      | -0.11 | -0.12 | 0.14   | 0.14379 | 0.64604                    | -0.18                    | -0.09    | -0.25                 | -0.21      | -0.21 | -0.17 | -0.10  |   |   |  |
| HILICpos_254.1594_2.34 | HILIC | pos        | 2.34            | 254.1594   |            |      | 4        | 254.1594 | 0.35529                                 | 0.67460 | 0.26  | 0.01                  | 0.56       | 0.29  | 0.99  | 0.23   | 0.87434 | 0.98195                    | -0.08                    | -0.12    | 0.02                  | -0.09      | 0.03  | -0.35 | -0.26  |   |   |  |
| RPpos_254.2475_11.58   | RP    | pos        | 11.58           | 254.2475   |            |      | 4        | 254.2475 | 0.53357                                 | 0.79543 | 0.22  | 0.24                  | 0.31       | 0.33  | 0.33  | -0.62  | 0.65631 | 0.94046                    | 0.14                     | 0.71     | 0.41                  | 0.25       | -0.10 | -0.12 | -0.15  |   |   |  |
| RPpos_254.6229_8.424   | RP    | pos        | 8.424           | 254.6229   |            |      | 4        | 254.6229 | 0.08671                                 | 0.41277 | 0.26  | 0.15                  | 0.35       | 0.34  | 0.44  | 0.39   | 0.36468 | 0.83786                    | -0.21                    | -0.34    | -0.23                 | -0.14      | -0.09 | -0.10 | -0.13  |   |   |  |
| HILICneg_254.734_1.45  | HILIC | neg        | 1.45            | 254.7340   |            |      | 4        | 254.7340 | 0.31046                                 | 0.63884 | -0.44 | -0.42                 | -0.06      | -0.53 | 0.28  | 0.27   | 0.80583 | 0.97022                    | 0.15                     | 0.12     | 0.57                  | 0.24       | 0.41  | -0.29 | 0.34   |   |   |  |
| RPneg_254.92804_3.523  | RP    | neg        | 3.523           | 254.9280   |            |      | 4        | 254.9280 | 0.33715                                 | 0.66015 | 0.28  | 0.11                  | 0.67       | 0.52  | 0.39  | -0.17  | 0.00071 | 0.04547                    | 0.98                     | -0.26    | 0.46                  | 1.77       | 0.48  | 0.33  | 0.07   |   |   |  |
| HILICneg_254.9522_4.12 | HILIC | neg        | 4.12            | 254.9522   |            |      | 4        | 254.9522 | 0.79187                                 | 0.91879 | 0.05  | 0.23                  | 0.55       | 0.28  | -0.28 | -0.51  | 0.03531 | 0.38399                    | 0.43                     | 0.36     | 0.31                  | 1.14       | 0.44  | 0.23  | 0.04   |   |   |  |
| RPneg_254.97911_5.815  | RP    | neg        | 5.815           | 254.9791   |            |      | 4        | 254.9791 | 0.46500                                 | 0.75402 | -0.13 | -0.01                 | 0.00       | -0.08 | -0.06 | -0.25  | 0.03840 | 0.39930                    | 0.81                     | 0.89     | 0.71                  | 0.86       | 1.01  | 0.76  | 1.06   |   |   |  |
| HILICneg_254.9813_6.39 | HILIC | neg        | 6.39            | 254.9813   |            |      | 4        | 254.9813 | 0.40697                                 | 0.71314 | -0.23 | -0.21                 | -0.05      | -0.20 | -0.02 | -0.54  | 0.09645 | 0.56647                    | -0.32                    | -0.27    | -0.37                 | 0.06       | -0.44 | -0.46 | -0.26  |   |   |  |
| HILICneg_254.9816_0.68 | HILIC | neg        | 0.68            | 254.9816   |            |      | 4        | 254.9816 | 0.15621                                 | 0.49924 | -0.16 | -0.17                 | -0.05      | 0.16  | 0.04  | -0.20  | 0.91001 | 0.98698                    | 0.04                     | 0.30     | 0.07                  | -0.10      | -0.05 | -0.05 | 0.31   |   |   |  |
| RPneg_254.99448_3.731  | RP    | neg        | 3.731           | 254.9945   |            |      | 4        | 254.9945 | 0.06112                                 | 0.36824 | 0.44  | 0.44                  | 0.73       | 0.44  | 0.36  | 0.64   | 0.09793 | 0.56888                    | -0.59                    | -0.71    | -0.45                 | -0.65      | -0.50 | -0.46 | -0.40  |   |   |  |
| RPneg_254.99661_5.638  | RP    | neg        | 5.638           | 254.9966   |            |      | 4        | 254.9966 | 0.56365                                 | 0.81093 | 0.16  | 0.17                  | 0.21       | 0.12  | 0.18  | 0.75   | 0.25895 | 0.77346                    | -0.16                    | -0.23    | -0.15                 | -0.17      | -0.12 | -0.14 | -0.19  |   |   |  |
| HILICneg_255.0348_3.33 | HILIC | neg        | 3.33            | 255.0348   |            |      | 4        | 255.0348 | 0.47844                                 | 0.76314 | -0.22 | 0.09                  | -0.20      | -0.26 | -0.03 | -0.27  | 0.02920 | 0.35587                    | -0.33                    | -0.08    | -0.21                 | -0.03      | -0.28 | -0.51 | -0.23  |   |   |  |
| RPneg_255.06577_7.358  | RP    | neg        | 7.358           | 255.0658   |            |      |          |          |                                         |         |       |                       |            |       |       |        |         |                            |                          |          |                       |            |       |       |        |   |   |  |





| Feature_ID             | Mode  | Ionization | Average.Rt.min. | Average.Mz | Metabolite | MSMS | ID_Level | HMDB_ID | IV-Alcohol self-administration (IV-ASA) |         |       |        |       |       |                       |       |         |          |       |       |                            | IV-Alcohol clamp (IV-AC) |       |       |       |   |                       |  |  |  |  |  |  |  |
|------------------------|-------|------------|-----------------|------------|------------|------|----------|---------|-----------------------------------------|---------|-------|--------|-------|-------|-----------------------|-------|---------|----------|-------|-------|----------------------------|--------------------------|-------|-------|-------|---|-----------------------|--|--|--|--|--|--|--|
|                        |       |            |                 |            |            |      |          |         | Area Under the Curve (AUC)              |         |       |        |       |       | IV-Ghrelin or Placebo |       |         |          |       |       | Area Under the Curve (AUC) |                          |       |       |       |   | IV-Ghrelin or Placebo |  |  |  |  |  |  |  |
|                        |       |            |                 |            |            |      |          |         | Baseline                                |         |       | IV-ASA |       |       | BrAC=0                |       |         | Baseline |       |       | Post-LD                    |                          |       | IV-AC |       |   | BrAC=0                |  |  |  |  |  |  |  |
|                        |       |            |                 |            |            |      |          |         | p                                       | q       | d     | d      | d     | d     | d                     | d     | d       | p        | q     | d     | d                          | d                        | d     | d     | d     | d |                       |  |  |  |  |  |  |  |
| HILICneg_259.0291_0.83 | neg   |            | 0.83            | 259.0291   |            |      | 4        |         | 0.50215                                 | 0.7746  | -0.03 | 0.18   | 0.13  | 0.00  | 0.29                  | -0.44 | 0.09664 | 0.56668  | 0.05  | 0.10  | 0.13                       | 0.17                     | 0.14  | -0.19 | 0.09  |   |                       |  |  |  |  |  |  |  |
| RPneg_259.04648_7.293  | RP    | neg        | 7.293           | 259.0465   |            |      | 4        |         | 0.43029                                 | 0.73046 | 0.19  | -0.20  | 0.60  | 0.21  | 0.24                  | 0.65  | 0.04644 | 0.43175  | 0.91  | -0.08 | 0.58                       | 1.03                     | 0.64  | 0.73  | 0.56  |   |                       |  |  |  |  |  |  |  |
| HILICneg_259.0548_1.26 | HILIC | neg        | 1.26            | 259.0548   |            |      | 4        |         | 0.35804                                 | 0.67699 | 0.33  | 0.42   | 0.40  | 0.52  | 0.54                  | -0.53 | 0.69485 | 0.95033  | -0.07 | -0.19 | -0.19                      | 0.05                     | -0.07 | 0.00  | 0.00  |   |                       |  |  |  |  |  |  |  |
| RPneg_259.06409_6.973  | RP    | neg        | 6.973           | 259.0641   |            |      | 4        |         | 0.22319                                 | 0.56570 | 0.43  | 0.57   | 0.62  | 0.40  | 0.58                  | 0.32  | 0.75472 | 0.96239  | 0.09  | 0.04  | 0.16                       | 0.11                     | 0.08  | 0.16  | 0.06  |   |                       |  |  |  |  |  |  |  |
| RPpos_259.0652_2.86    | RP    | pos        | 2.86            | 259.0652   |            |      | 4        |         | 0.83361                                 | 0.93730 | 0.07  | 0.10   | 0.23  | 0.13  | 0.20                  | -0.14 | 0.12383 | 0.61249  | 0.99  | 1.32  | 0.83                       | 0.71                     | 1.18  | 0.80  | 0.91  |   |                       |  |  |  |  |  |  |  |
| RPneg_259.07702_2.835  | RP    | neg        | 2.835           | 259.0770   |            |      | 4        |         | 0.95562                                 | 0.97687 | 0.02  | 0.07   | 0.04  | 0.13  | 0.10                  | -0.23 | 0.14803 | 0.65122  | 0.02  | 0.05  | 0.60                       | 1.95                     | 2.39  | 1.35  | 1.47  |   |                       |  |  |  |  |  |  |  |
| HILICneg_259.0908_5.85 | HILIC | neg        | 5.85            | 259.0908   |            |      | 4        |         | 0.82499                                 | 0.93365 | 0.12  | 0.43   | 0.68  | 0.17  | 0.12                  | -0.42 | 0.03106 | 0.36673  | 1.04  | 0.86  | 1.12                       | 1.26                     | 0.87  | 0.68  | -0.18 |   |                       |  |  |  |  |  |  |  |
| HILICpos_259.0927_5.64 | HILIC | pos        | 5.64            | 259.0927   |            |      | 4        |         | 0.13582                                 | 0.47549 | 0.21  | 0.25   | 0.47  | 0.26  | 0.27                  | 0.00  | 0.26001 | 0.77424  | 0.06  | 0.00  | 0.16                       | 0.11                     | -0.02 | 0.12  | -0.17 |   |                       |  |  |  |  |  |  |  |
| RPneg_259.11877_11.544 | RP    | neg        | 11.544          | 259.1188   |            |      | 4        |         | 0.12374                                 | 0.45914 | -0.60 | 0.36   | -0.28 | -0.82 | 0.21                  | -0.11 | 0.62401 | 0.93343  | 0.15  | -0.57 | -0.56                      | 0.40                     | -0.20 | 0.51  | 0.26  |   |                       |  |  |  |  |  |  |  |
| HILICneg_259.1191_0.96 | HILIC | neg        | 0.96            | 259.1191   |            |      | 4        |         | 0.72167                                 | 0.88633 | 0.11  | 0.25   | 0.27  | 0.22  | 0.49                  | -0.54 | 0.39180 | 0.85219  | 0.16  | -0.08 | 0.29                       | 0.38                     | 0.27  | 0.31  | -0.74 |   |                       |  |  |  |  |  |  |  |
| RPneg_259.12952_2.936  | RP    | neg        | 2.936           | 259.1295   |            |      | 4        |         | 0.06822                                 | 0.38071 | 0.41  | 0.30   | 1.39  | 0.32  | 0.34                  | -0.42 | 0.01088 | 0.22187  | 0.36  | 0.09  | 0.32                       | 0.99                     | 0.10  | 0.18  | -0.04 |   |                       |  |  |  |  |  |  |  |
| RPneg_259.12961_3.327  | RP    | neg        | 3.327           | 259.1296   |            |      | 4        |         | 0.34153                                 | 0.66366 | 0.26  | 0.35   | 0.89  | 0.34  | 0.25                  | -0.36 | 0.05624 | 0.46853  | 0.28  | 0.12  | 0.21                       | 0.48                     | 0.47  | 0.40  | -0.35 |   |                       |  |  |  |  |  |  |  |
| RPneg_259.12976_4.3    | RP    | neg        | 4.3             | 259.1298   |            |      | 4        |         | 0.17169                                 | 0.51704 | 0.90  | 1.12   | 1.05  | 1.02  | 1.11                  | 0.15  | 0.38604 | 0.84995  | -0.29 | -0.24 | -0.28                      | -0.30                    | -0.31 | -0.29 | -0.37 |   |                       |  |  |  |  |  |  |  |
| RPpos_259.6307_10.55   | RP    | pos        | 10.55           | 259.6307   |            |      | 4        |         | 0.53620                                 | 0.79668 | -0.25 | -0.20  | 0.03  | 0.18  | -0.12                 | -0.30 | 0.68922 | 0.94980  | 0.09  | -0.01 | -0.12                      | 0.05                     | 0.44  | 0.33  | -0.32 |   |                       |  |  |  |  |  |  |  |
| RPpos_259.6494_10.63   | RP    | pos        | 10.63           | 259.6494   |            |      | 4        |         | 0.00261                                 | 0.10507 | -0.55 | 0.04   | -0.27 | -0.44 | -0.58                 | -0.57 | 0.50581 | 0.90356  | 0.00  | -0.03 | -0.02                      | 0.07                     | 0.25  | -0.10 | -0.19 |   |                       |  |  |  |  |  |  |  |
| RPneg_259.8158_5.191   | RP    | neg        | 5.191           | 259.8158   |            |      | 4        |         | 0.59508                                 | 0.82651 | 0.24  | 0.12   | 0.28  | 0.54  | 1.37                  | 0.41  | 0.61002 | 0.93036  | 0.02  | -0.35 | 0.18                       | 0.39                     | -0.18 | 0.12  | -0.33 |   |                       |  |  |  |  |  |  |  |
| RPneg_259.8161_7.43    | RP    | neg        | 7.43            | 259.8161   |            |      | 4        |         | 0.34247                                 | 0.66427 | -0.11 | -0.03  | 0.24  | 0.07  | 0.25                  | -0.25 | 0.94932 | 0.99332  | -0.09 | 0.18  | -0.10                      | 0.15                     | -0.16 | -0.27 | -0.09 |   |                       |  |  |  |  |  |  |  |
| HILICneg_259.8164_3.35 | HILIC | neg        | 3.35            | 259.8164   |            |      | 4        |         | 0.04750                                 | 0.34083 | -0.76 | -0.54  | -0.19 | -0.33 | -0.08                 | -0.94 | 0.91383 | 0.98749  | -0.01 | 0.39  | -0.46                      | 0.35                     | 0.04  | -0.02 | 0.02  |   |                       |  |  |  |  |  |  |  |
| HILICneg_259.8165_4.89 | HILIC | neg        | 4.89            | 259.8165   |            |      | 4        |         | 0.74700                                 | 0.89220 | -0.01 | 0.45   | 0.48  | -0.15 | 0.27                  | 0.54  | 0.12638 | 0.61763  | -0.35 | 0.06  | -0.63                      | 0.05                     | -0.05 | -0.67 | -0.60 |   |                       |  |  |  |  |  |  |  |
| HILICneg_259.8167_1.43 | HILIC | neg        | 1.43            | 259.8167   |            |      | 4        |         | 0.06835                                 | 0.38074 | -0.43 | -0.30  | 0.13  | -0.28 | 0.24                  | 0.14  | 0.00001 | 0.00172  | 0.84  | 0.78  | 1.21                       | 1.86                     | 0.30  | 0.57  | 0.32  |   |                       |  |  |  |  |  |  |  |
| HILICneg_259.8167_0.53 | HILIC | neg        | 0.53            | 259.8167   |            |      | 4        |         | 0.21750                                 | 0.55929 | -0.32 | 0.09   | -0.01 | 0.17  | -0.22                 | 0.14  | 0.22652 | 0.74354  | -0.06 | 0.56  | 0.90                       | -0.29                    | 0.43  | -0.45 | 0.32  |   |                       |  |  |  |  |  |  |  |
| HILICneg_259.8397_7.73 | HILIC | neg        | 7.73            | 259.8397   |            |      | 4        |         | 0.61318                                 | 0.83485 | -0.22 | 0.22   | 0.20  | 0.04  | 0.30                  | -0.44 | 0.08475 | 0.54135  | -0.32 | -0.04 | -0.32                      | -0.09                    | -0.50 | -0.35 | -0.26 |   |                       |  |  |  |  |  |  |  |
| RPneg_259.87222_10.523 | RP    | neg        | 10.523          | 259.8722   |            |      | 4        |         | 0.42783                                 | 0.72875 | -0.20 | -0.17  | -0.07 | 0.11  | -0.04                 | 0.20  | 0.80734 | 0.97037  | 0.01  | -0.12 | -0.13                      | 0.11                     | 0.07  | 0.06  | -0.08 |   |                       |  |  |  |  |  |  |  |
| HILICneg_259.982_5.41  | HILIC | neg        | 5.41            | 259.9820   |            |      | 4        |         | 0.20590                                 | 0.54951 | -0.43 | -1.22  | 0.19  | -0.18 | -0.02                 | 0.00  | 0.57124 | 0.92172  | -0.13 | -0.70 | -0.38                      | 0.15                     | 0.19  | 0.14  | -1.68 |   |                       |  |  |  |  |  |  |  |
| RPneg_259.9989_1.596   | RP    | neg        | 1.596           | 259.9989   |            |      | 4        |         | 0.68030                                 | 0.86724 | 0.09  | 0.29   | 0.04  | 0.10  | 0.33                  | 0.03  | 0.10388 | 0.57943  | 0.76  | 0.34  | 0.31                       | 0.57                     | 0.74  | 0.65  | 1.78  |   |                       |  |  |  |  |  |  |  |
| RPneg_259.99902_1.057  | RP    | neg        | 1.057           | 259.9990   |            |      | 4        |         | 0.44699                                 | 0.74235 | 0.16  | 0.55   | 0.08  | 0.12  | 0.42                  | 0.11  | 0.10953 | 0.59030  | 0.89  | 0.41  | 0.56                       | 0.66                     | 0.80  | 0.70  | 1.75  |   |                       |  |  |  |  |  |  |  |
| RPneg_259.99921_1.359  | RP    | neg        | 1.359           | 259.9992   |            |      | 4        |         | 0.09269                                 | 0.42191 | 0.53  | 0.45   | 0.20  | 0.29  | 1.41                  | 0.33  | 0.33631 | 0.82387  | 2.01  | 0.52  | 1.80                       | 2.73                     | 0.89  | 0.83  | 2.15  |   |                       |  |  |  |  |  |  |  |
| RPpos_260.023_5.2      | RP    | pos        | 5.2             | 260.0230   |            |      | 4        |         | 0.82781                                 | 0.93484 | 0.03  | -0.05  | 0.06  | 0.07  | 0.01                  | 0.70  | 0.20379 | 0.71972  | 0.11  | 0.08  | 0.02                       | 0.17                     | 0.20  | 0.18  | 0.10  |   |                       |  |  |  |  |  |  |  |
| RPneg_260.0231_1.262   | RP    | neg        | 1.262           | 260.0231   |            |      | 4        |         | 0.09846                                 | 0.42894 | -0.25 | 0.18   | -0.03 | 0.01  | 0.14                  | -0.29 | 0.03413 | 0.37871  | -0.43 | -0.32 | -0.44                      | -0.57                    | -0.47 | -0.63 | 0.02  |   |                       |  |  |  |  |  |  |  |
| HILICneg_260.0235_5.66 | HILIC | neg        | 5.66            | 260.0235   |            |      | 4        |         | 0.26012                                 | 0.59816 | -0.20 | 0.15   | 0.05  | 0.13  | 0.12                  | -0.19 | 0.05432 | 0.46163  | -0.44 | -0.24 | -0.32                      | -0.47                    | -0.57 | -0.72 | -0.02 |   |                       |  |  |  |  |  |  |  |
| RPneg_260.0236_1.96    | RP    | neg        | 1.96            | 260.0236   |            |      | 4        |         | 0.37954                                 | 0.69411 | -0.09 | -0.04  | 0.09  | -0.05 | -0.22                 | -0.37 | 0.04723 | 0.43433  | -0.28 | 0.20  | 0.18                       | 0.31                     | 0.39  | 0.38  | 0.07  |   |                       |  |  |  |  |  |  |  |
| RPneg_260.02359_2.304  | RP    | neg        | 2.304           | 260.0236   |            |      | 4        |         | 0.51397                                 | 0.78267 | -0.08 | 0.01   | 0.10  | -0.15 | -0.01                 | -0.58 | 0.12255 | 0.61107  | 0.14  | 0.09  | 0.07                       | 0.20                     | 0.27  | 0.16  | -0.09 |   |                       |  |  |  |  |  |  |  |
| RPneg_260.03546_13.187 | RP    | neg        | 13.187          | 260.0355   |            |      | 4        |         | 0.56035                                 | 0.80938 | -0.18 | 0.61   | -0.40 | 0.24  | 0.11                  | -0.45 | 0.20055 | 0.71646  | -0.17 | -0.18 | -0.22                      | 0.09                     | -0.22 | -0.14 | 0.61  |   |                       |  |  |  |  |  |  |  |
| HILICneg_260.0385_6.41 | HILIC | neg        | 6.41            | 260.0385   |            |      | 4        |         | 0.14091                                 | 0.48076 | -0.33 | -0.14  | -0.24 | -0.20 | -0.33                 | -0.24 | 0.00167 | 0.07771  | -0.74 | -0.81 | -0.83                      | -0.25                    | -0.71 | -0.90 | -0.27 |   |                       |  |  |  |  |  |  |  |
| RPneg_260.04498_1.404  | RP    | neg        | 1.404           | 260.0450   |            |      | 4        |         | 0.91115                                 | 0.96721 | 0.03  | 0.25   | 1.34  | 0.13  | -0.25                 | -0.68 | 0.01230 | 0.23701  | 0.72  | 0.65  | 1.15                       | 1.03                     | 1.01  | 0.22  | -0.15 |   |                       |  |  |  |  |  |  |  |
| HILICneg_260.0632_0.94 | HILIC | neg        | 0.94            | 260.0632   |            |      | 4        |         | 0.72953                                 | 0.88980 | 0.11  | 0.16   | 0.38  | 0.20  | 0.14                  | -0.54 | 0.66393 | 0.94310  | -0.14 | -0.15 | -0.10                      | -0.24                    | -0.13 | -0.17 | -0.15 |   |                       |  |  |  |  |  |  |  |
| HILICneg_260.0821_2.33 | HILIC | neg        | 2.33            | 260.0821   |            |      | 4        |         | 0.32125                                 | 0.64751 | 0.22  | 0.02   | 0.45  | 0.47  | 0.38                  | 0.39  | 0.00095 | 0.05534  | 0.20  | -0.08 | 0.20                       | 0.68                     | 0.01  | 0.28  | 0.02  |   |                       |  |  |  |  |  |  |  |
| HILICpos_260.1494_2.28 | HILIC | pos        | 2.28            | 260.1494   |            |      | 4        |         | 0.29193                                 | 0.62462 | 0.31  | 0.36   | 0.62  | 0.87  | 0.34                  | -0.06 | 0.04536 | 0.42712  | -0.40 | -0.53 | -0.33                      | -0.54                    | -0.60 | -0.54 | -0.92 |   |                       |  |  |  |  |  |  |  |
| HILICpos_260.1645_0.41 | HILIC | pos        | 0.41            | 260.1645   |            |      | 4        |         | 0.67928                                 | 0.86674 | -0.20 | -0.31  | -0.20 | 0.14  | -0.08                 | -0.42 | 0.47248 | 0.89157  | 0.04  | -0.09 | 0.15                       | -0.09                    | 0.36  | -0.03 | -0.07 |   |                       |  |  |  |  |  |  |  |
| HILICpos_260.1969_6.56 | HILIC | pos        | 6.56            | 260.1969   |            |      | 4        |         | 0.58623                                 | 0.82174 | -0.14 | 0.02   | 0.09  | 0.08  | 0.17                  | -0.62 | 0.16366 | 0.67438  | -0.38 | -0.54 | -0.30                      | -0.23                    | -0.42 | -0.30 | -0.41 |   |                       |  |  |  |  |  |  |  |
| RPpos_260.6395_10.17   | RP    | pos        | 10.17           | 260.6395   |            |      | 4        |         | 0.02681                                 | 0.28244 | -0.53 | -0.49  | -0.23 | -0.52 | -0.36                 | -0.14 | 0.34851 | 0.83042  | -0.15 | -0.30 | 0.02                       | -0.21                    | -0.18 | -0.07 | -0.06 |   |                       |  |  |  |  |  |  |  |
| RPpos_260.6573_10.71   | RP    | pos        | 10.71           | 260.6573   |            |      | 4        |         | 0.15862                                 | 0.50183 | -0.40 | 0.20   | -0.05 | -0.38 | -0.21                 | -0.34 | 0.59926 | 0.92780  | -0.01 | 0.14  | 0.06                       | 0.00                     | 0.01  | -0.06 | -0.11 |   |                       |  |  |  |  |  |  |  |
| RPpos_260.6784_4.3     | RP    | pos        | 4.3             | 260.6784   |            |      | 4        |         | 0.62642                                 | 0.84168 | 0.02  | 0.03   | 0.26  | -0.16 | 0.13                  | 0.28  | 0.59145 | 0.92661  | -0.12 | -0.25 | -0.17                      | -0.27                    | 0.12  | -0.23 | -0.31 |   |                       |  |  |  |  |  |  |  |
| HILICpos_260.6976_6.22 | HILIC | pos        | 6.22            | 260.6976   |            |      | 4        |         | 0.00423                                 | 0.13262 | -0.35 | 0.00   | 0.03  | -0.29 | -0.04                 | -0.41 | 0.81237 | 0.97     |       |       |                            |                          |       |       |       |   |                       |  |  |  |  |  |  |  |

| Feature_ID             | Mode  | Ionization | Average_Rt.min. | Average_Mz | Metabolite | MSMS | ID_Level | HMDB_ID | IV-Alcohol self-administration (IV-ASA) |         |       |       |       |                       |       |       |         |         | IV-Alcohol clamp (IV-AC)   |       |       |       |       |                       |       |   |   |   |
|------------------------|-------|------------|-----------------|------------|------------|------|----------|---------|-----------------------------------------|---------|-------|-------|-------|-----------------------|-------|-------|---------|---------|----------------------------|-------|-------|-------|-------|-----------------------|-------|---|---|---|
|                        |       |            |                 |            |            |      |          |         | Area Under the Curve (AUC)              |         |       |       |       | IV-Ghrelin or Placebo |       |       |         |         | Area Under the Curve (AUC) |       |       |       |       | IV-Ghrelin or Placebo |       |   |   |   |
|                        |       |            |                 |            |            |      |          |         | Baseline                                |         |       |       |       | BrAC=0                |       |       |         |         | Baseline                   |       |       |       |       | Post-LD               |       |   |   |   |
|                        |       |            |                 |            |            |      |          |         | p                                       | q       | d     | d     | d     | d                     | d     | d     | d       | d       | p                          | q     | d     | d     | d     | d                     | d     | d | d | d |
| RPneg_262.01749_4.894  | RP    | neg        | 4.894           | 262.0175   |            |      | 4        |         | 0.27417                                 | 0.60955 | 0.08  | 0.12  | 0.11  | 0.06                  | 0.12  | 0.48  | 0.25086 | 0.76715 | -0.22                      | -0.28 | -0.22 | -0.11 | -0.23 | -0.17                 | -0.35 |   |   |   |
| HILICneg_262.0336_0.96 | HILIC | neg        | 0.96            | 262.0336   |            |      | 4        |         | 0.25743                                 | 0.59559 | -0.22 | 0.06  | -0.05 | -0.05                 | -0.21 | -0.60 | 0.35514 | 0.83325 | 0.11                       | 0.22  | 0.26  | -0.06 | 0.27  | -0.05                 | 0.28  |   |   |   |
| RPpos_262.0869_7.9     | RP    | pos        | 7.9             | 262.0869   |            |      | 4        |         | 0.28232                                 | 0.61644 | -0.27 | -0.25 | -0.24 | -0.26                 | -0.20 | -0.33 | 0.26254 | 0.77497 | -0.34                      | -0.08 | -0.29 | -0.48 | -0.18 | -0.39                 | 0.11  |   |   |   |
| HILICpos_262.1284_5.49 | HILIC | pos        | 5.49            | 262.1284   |            |      | 4        |         | 0.74312                                 | 0.89730 | -0.11 | 0.22  | 0.70  | -0.16                 | -0.20 | 1.16  | 0.89362 | 0.98445 | 0.09                       | -0.28 | -0.16 | 1.38  | 0.14  | 0.16                  | -0.33 |   |   |   |
| HILICpos_262.1284_5.91 | HILIC | pos        | 5.91            | 262.1284   |            |      | 4        |         | 0.71886                                 | 0.88537 | 0.10  | 0.06  | 0.57  | 0.11                  | 0.04  | -0.36 | 0.52125 | 0.98888 | 0.15                       | -0.08 | 0.30  | 0.43  | 0.18  | -0.17                 | -0.27 |   |   |   |
| HILICpos_262.1433_0.08 | HILIC | pos        | 0.08            | 262.1433   |            |      | 4        |         | 0.19491                                 | 0.54105 | 0.01  | -0.01 | -0.11 | 0.11                  | 0.06  | -0.12 | 0.41257 | 0.86459 | -0.15                      | 0.01  | -0.09 | 0.12  | -0.05 | -0.14                 | -0.07 |   |   |   |
| HILICpos_262.1643_3.1  | HILIC | pos        | 3.1             | 262.1643   |            |      | 4        |         | 0.57026                                 | 0.81414 | 0.14  | 0.25  | 0.41  | -0.03                 | 0.37  | 1.68  | 0.63783 | 0.93628 | 0.13                       | 0.28  | 0.57  | 0.51  | 0.14  | 0.04                  | -0.41 |   |   |   |
| HILICpos_262.1643_3.31 | HILIC | pos        | 3.31            | 262.1643   |            |      | 4        |         | 0.46951                                 | 0.75681 | 0.27  | 0.49  | 0.86  | 0.16                  | 0.44  | 0.02  | 0.74879 | 0.96125 | -0.14                      | -0.38 | -0.16 | 1.43  | 0.27  | 0.17                  | -0.39 |   |   |   |
| HILICpos_262.1798_0.45 | HILIC | pos        | 0.45            | 262.1798   |            |      | 4        |         | 0.83461                                 | 0.93788 | -0.09 | 0.02  | -0.03 | 0.40                  | -0.02 | -0.57 | 0.51353 | 0.90648 | -0.04                      | -0.03 | 0.08  | -0.10 | 0.07  | -0.23                 | 0.05  |   |   |   |
| RPneg_262.62048_6.927  | RP    | neg        | 6.927           | 262.6205   |            |      | 4        |         | 0.33220                                 | 0.65619 | -0.12 | -0.08 | -0.02 | -0.08                 | 0.06  | -0.28 | 0.65835 | 0.94137 | -0.09                      | -0.16 | -0.06 | -0.15 | -0.11 | -0.05                 | -0.04 |   |   |   |
| RPpos_262.6368_9.87    | RP    | pos        | 9.87            | 262.6368   |            |      | 4        |         | 0.12094                                 | 0.45664 | -0.36 | -0.04 | -0.07 | -0.32                 | -0.22 | -0.20 | 0.14476 | 0.64786 | -0.46                      | -0.54 | -0.53 | -0.75 | -0.42 | -0.69                 | -0.26 |   |   |   |
| RPneg_262.84021_9.745  | RP    | neg        | 9.745           | 262.8402   |            |      | 4        |         | 0.34836                                 | 0.66895 | -0.09 | 0.02  | 0.03  | -0.12                 | 0.03  | -0.19 | 0.78837 | 0.96713 | -0.07                      | -0.19 | 0.23  | 0.00  | -0.23 | -0.16                 | -0.13 |   |   |   |
| RPneg_262.92194_3.523  | RP    | neg        | 3.523           | 262.9219   |            |      | 4        |         | 0.11307                                 | 0.44902 | 0.35  | 0.46  | 1.05  | 0.57                  | 0.20  | -0.07 | 0.02195 | 0.24372 | 0.73                       | 0.83  | 0.51  | 0.20  | 0.89  | 0.44                  | 0.46  |   |   |   |
| RPneg_262.92285_3.261  | RP    | neg        | 3.261           | 262.9229   |            |      | 4        |         | 0.65239                                 | 0.85359 | 0.13  | 0.40  | 1.02  | 0.23                  | 0.03  | 0.25  | 0.00014 | 0.01536 | 0.84                       | 0.21  | 0.58  | 1.61  | 1.08  | 0.32                  | -0.03 |   |   |   |
| HILICneg_262.9372_0.48 | HILIC | neg        | 0.48            | 262.9372   |            |      | 4        |         | 0.24225                                 | 0.58300 | -0.29 | -0.14 | -0.24 | -0.10                 | -0.10 | -0.28 | 0.39579 | 0.85478 | -0.16                      | -0.03 | -0.18 | 0.00  | -0.26 | -0.22                 | -0.08 |   |   |   |
| HILICneg_262.9456_3.33 | HILIC | neg        | 3.33            | 262.9456   |            |      | 4        |         | 0.53071                                 | 0.79368 | 0.21  | 0.16  | 0.70  | 0.34                  | 0.51  | 0.35  | 0.11936 | 0.60572 | 0.74                       | 0.14  | 0.59  | 0.06  | 1.96  | 0.33                  | 0.45  |   |   |   |
| RPneg_263.00165_6.452  | RP    | neg        | 6.452           | 263.0017   |            |      | 4        |         | 0.82204                                 | 0.93238 | 0.00  | 0.00  | 0.04  | -0.03                 | 0.03  | 0.41  | 0.19155 | 0.70702 | 0.09                       | 0.08  | 0.12  | 0.07  | 0.12  | 0.16                  | 0.04  |   |   |   |
| HILICpos_263.0133_7.71 | HILIC | pos        | 7.71            | 263.0133   |            |      | 4        |         | 0.32736                                 | 0.65211 | -0.10 | 0.33  | 0.15  | -0.05                 | -0.18 | -0.08 | 0.69394 | 0.95908 | 0.02                       | 0.20  | 0.06  | -0.09 | -0.11 | 0.10                  | 0.09  |   |   |   |
| RPneg_263.0188_6.555   | RP    | neg        | 6.555           | 263.0188   |            |      | 4        |         | 0.22237                                 | 0.56478 | 0.06  | 0.05  | 0.10  | -0.08                 | 0.08  | 0.49  | 0.07023 | 0.50745 | 0.04                       | 0.02  | 0.05  | -0.01 | 0.01  | 0.13                  | 0.00  |   |   |   |
| RPneg_263.02292_1.132  | RP    | neg        | 1.132           | 263.0229   |            |      | 4        |         | 0.54484                                 | 0.80076 | 0.11  | -0.02 | 0.13  | 0.04                  | -0.05 | -0.34 | 0.79050 | 0.96713 | 0.22                       | 0.15  | 0.17  | 0.23  | 0.37  | 0.19                  | 0.17  |   |   |   |
| HILICneg_263.0233_1.07 | HILIC | neg        | 1.07            | 263.0233   |            |      | 4        |         | 0.38753                                 | 0.69968 | 0.08  | -0.03 | 0.54  | 0.26                  | 0.20  | -0.18 | 0.28789 | 0.79407 | 0.34                       | 0.15  | 0.53  | 0.42  | 0.46  | 0.36                  | -0.07 |   |   |   |
| HILICneg_263.0384_3.8  | HILIC | neg        | 3.8             | 263.0384   |            |      | 4        |         | 0.20419                                 | 0.54850 | -0.16 | 0.09  | 0.01  | 0.25                  | -0.35 | 0.25  | 0.64712 | 0.93869 | -0.02                      | -0.26 | 0.31  | -0.21 | -0.03 | -0.40                 | 0.40  |   |   |   |
| HILICneg_263.0437_0.96 | HILIC | neg        | 0.96            | 263.0437   |            |      | 4        |         | 0.36540                                 | 0.68294 | 0.25  | 0.30  | 0.50  | 0.27                  | 0.63  | 0.72  | 0.44685 | 0.88066 | 0.23                       | 0.15  | 0.10  | 0.30  | 0.34  | 0.52                  | 0.08  |   |   |   |
| RPneg_263.05389_4.86   | RP    | neg        | 4.86            | 263.0539   |            |      | 4        |         | 0.03199                                 | 0.29447 | 0.94  | 0.02  | 1.01  | 1.24                  | 1.23  | -0.18 | 0.46664 | 0.88820 | 0.28                       | -0.02 | 0.02  | 0.36  | 0.49  | 0.58                  | -0.20 |   |   |   |
| RPpos_263.0887_7.72    | RP    | pos        | 7.72            | 263.0887   |            |      | 4        |         | 0.36643                                 | 0.68352 | -0.05 | 0.01  | 0.13  | -0.09                 | 0.04  | -0.29 | 0.86297 | 0.97989 | 0.04                       | -0.03 | 0.09  | 0.06  | 0.01  | 0.11                  | 0.02  |   |   |   |
| RPneg_263.12906_7.14   | RP    | neg        | 7.14            | 263.1291   |            |      | 4        |         | 0.00068                                 | 0.05096 | 0.60  | 0.53  | 0.89  | 0.80                  | 0.76  | 0.49  | 0.15572 | 0.66213 | -0.53                      | -0.48 | -0.45 | -0.54 | -0.54 | -0.45                 | -0.61 |   |   |   |
| HILICpos_263.1363_0.79 | HILIC | pos        | 0.79            | 263.1363   |            |      | 4        |         | 0.67292                                 | 0.86385 | -0.19 | 0.59  | 0.80  | -0.01                 | -0.16 | -0.06 | 0.01640 | 0.27417 | -0.53                      | -0.24 | -0.27 | -0.41 | -0.32 | -0.45                 | -0.63 |   |   |   |
| HILICpos_263.1388_4.21 | HILIC | pos        | 4.21            | 263.1388   |            |      | 4        |         | 0.22949                                 | 0.57111 | 0.37  | 0.27  | 1.17  | 0.42                  | 0.53  | -0.22 | 0.26157 | 0.77484 | 0.25                       | 0.07  | 0.41  | 0.35  | 0.30  | 0.00                  | -0.03 |   |   |   |
| RPpos_263.1393_3.85    | RP    | pos        | 3.85            | 263.1393   |            |      | 4        |         | 0.33123                                 | 0.65531 | 0.37  | 0.26  | 0.72  | 0.55                  | 0.60  | 0.40  | 0.49757 | 0.90072 | -0.16                      | -0.21 | 0.13  | -0.19 | -0.12 | -0.34                 | -0.21 |   |   |   |
| HILICpos_263.1848_0.42 | HILIC | pos        | 0.42            | 263.1848   |            |      | 4        |         | 0.91298                                 | 0.96799 | -0.01 | 0.25  | 0.43  | 0.04                  | 0.13  | -0.19 | 0.88415 | 0.98281 | -0.11                      | -0.13 | 0.24  | -0.17 | -0.31 | -0.37                 | 0.70  |   |   |   |
| RPpos_263.2005_9.21    | RP    | pos        | 9.21            | 263.2005   |            |      | 4        |         | 0.78582                                 | 0.91598 | -0.04 | -0.01 | -0.05 | -0.07                 | 0.14  | 0.84  | 0.95326 | 0.99398 | -0.02                      | -0.08 | 0.11  | -0.19 | -0.22 | 0.52                  | -0.20 |   |   |   |
| RPpos_263.2374_10.61   | RP    | pos        | 10.61           | 263.2374   |            |      | 4        |         | 0.53114                                 | 0.79398 | 0.20  | 0.09  | 0.37  | 0.75                  | 0.70  | -0.29 | 0.17964 | 0.69482 | 0.24                       | 0.31  | -0.03 | 0.29  | 0.06  | 0.55                  | 0.21  |   |   |   |
| RPneg_263.6279_8.597   | RP    | neg        | 8.597           | 263.6279   |            |      | 4        |         | 0.00371                                 | 0.12445 | -0.69 | -0.34 | 0.91  | 0.77                  | 0.52  | -0.06 | 0.33947 | 0.82533 | 0.04                       | -0.13 | 0.03  | -0.02 | 0.42  | 0.10                  | -0.15 |   |   |   |
| RPneg_263.6279_8.773   | RP    | neg        | 8.773           | 263.6279   |            |      | 4        |         | 0.02617                                 | 0.28103 | 0.12  | -0.04 | 0.30  | 0.09                  | 0.20  | 0.09  | 0.91455 | 0.98766 | -0.04                      | 0.01  | -0.07 | 0.10  | 0.04  | 0.01                  | -0.08 |   |   |   |
| HILICneg_263.889_3.36  | HILIC | neg        | 3.36            | 263.8890   |            |      | 4        |         | 0.81747                                 | 0.93045 | -0.07 | -0.33 | -0.15 | 0.23                  | 0.31  | -0.57 | 0.68702 | 0.94924 | 0.20                       | 0.07  | -0.43 | -0.18 | 0.51  | 0.27                  | 1.02  |   |   |   |
| HILICneg_263.8891_4.88 | HILIC | neg        | 4.88            | 263.8891   |            |      | 4        |         | 0.35200                                 | 0.67184 | -0.11 | 0.41  | 0.26  | -0.18                 | -0.03 | 0.56  | 0.08019 | 0.53038 | -0.37                      | 0.20  | -0.71 | -0.19 | 0.02  | -0.82                 | -0.51 |   |   |   |
| HILICneg_263.8895_0.42 | HILIC | neg        | 0.42            | 263.8895   |            |      | 4        |         | 0.31876                                 | 0.64531 | 0.30  | -0.22 | 0.04  | 0.81                  | 0.69  | -0.16 | 0.88519 | 0.98281 | 0.04                       | 0.05  | 0.44  | 0.17  | -0.52 | 0.01                  | -0.12 |   |   |   |
| HILICneg_263.8895_4.33 | HILIC | neg        | 4.33            | 263.8895   |            |      | 4        |         | 0.26279                                 | 0.60008 | -0.13 | 0.18  | 0.39  | -0.16                 | -0.04 | -0.27 | 0.00366 | 0.12395 | 0.29                       | 0.23  | 0.29  | 0.22  | 0.48  | 0.17                  | 0.01  |   |   |   |
| HILICneg_263.918_5.69  | HILIC | neg        | 5.69            | 263.9180   |            |      | 4        |         | 0.75993                                 | 0.90495 | 0.07  | 0.18  | 0.32  | 0.73                  | 0.02  | -0.11 | 0.09848 | 0.56969 | 0.69                       | 0.81  | 0.77  | 0.65  | 0.74  | 0.59                  | -0.01 |   |   |   |
| HILICpos_263.9431_1.46 | HILIC | pos        | 1.46            | 263.9431   |            |      | 4        |         | 0.67928                                 | 0.86674 | -0.01 | 0.33  | 0.67  | 0.29                  | 0.10  | -0.40 | 0.00046 | 0.03499 | 0.59                       | 0.22  | 0.68  | 0.86  | 0.51  | 0.50                  | -0.15 |   |   |   |
| HILICpos_263.9993_0.94 | HILIC | pos        | 0.94            | 263.9993   |            |      | 4        |         | 0.52868                                 | 0.79258 | 0.10  | 0.09  | 0.36  | 0.27                  | 0.25  | -0.37 | 0.01024 | 0.21513 | -0.44                      | -0.51 | -0.57 | -0.38 | -0.28 | -0.42                 | -0.51 |   |   |   |
| HILICpos_264.0037_6.18 | HILIC | pos        | 6.18            | 264.0037   |            |      | 4        |         | 0.23496                                 | 0.57650 | 0.23  | 0.32  | 0.55  | 0.11                  | 0.59  | -0.40 | 0.39317 | 0.85343 | 0.28                       | -0.17 | 0.36  | 0.69  | 0.26  | -0.29                 | -0.21 |   |   |   |
| RPneg_264.03363_5.413  | RP    | neg        | 5.413           | 264.0336   |            |      | 4        |         | 0.49727                                 | 0.77455 | 0.57  | 0.65  | 0.49  | 0.46                  | 0.73  | 1.03  | 0.58927 | 0.92655 | 0.29                       | 0.26  | 0.01  | -0.04 | 0.35  | 0.14                  | 0.67  |   |   |   |
| HILICneg_264.0409_6.23 | HILIC | neg        | 6.23            | 264.0409   |            |      | 4        |         | 0.86648                                 | 0.94999 | 0.06  | 0.54  | 0.45  | -0.19                 | 0.14  | 0.74  | 0.90979 | 0.98698 | -0.04                      | -0.03 | -0.22 |       |       |                       |       |   |   |   |

| Feature_ID             | Mode  | Ionization | Average_Rt.min. | Average_Mz | Metabolite | MSMS | ID_Level | HMDB_ID | IV-Alcohol self-administration (IV-ASA) |       |       |        |       |       |                       |         |         |         |       |       |                            | IV-Alcohol clamp (IV-AC) |       |         |   |   |                       |   |   |         |   |   |  |  |
|------------------------|-------|------------|-----------------|------------|------------|------|----------|---------|-----------------------------------------|-------|-------|--------|-------|-------|-----------------------|---------|---------|---------|-------|-------|----------------------------|--------------------------|-------|---------|---|---|-----------------------|---|---|---------|---|---|--|--|
|                        |       |            |                 |            |            |      |          |         | Area Under the Curve (AUC)              |       |       |        |       |       | IV-Ghrelin or Placebo |         |         |         |       |       | Area Under the Curve (AUC) |                          |       |         |   |   | IV-Ghrelin or Placebo |   |   |         |   |   |  |  |
|                        |       |            |                 |            |            |      |          |         | Baseline                                |       |       | IV-ASA |       |       | Ghrelin               |         |         | Placebo |       |       | Baseline                   |                          |       | Post-LD |   |   | IV-AC                 |   |   | Placebo |   |   |  |  |
|                        |       |            |                 |            |            |      |          |         | p                                       | q     | d     | p      | q     | d     | p                     | q       | d       | p       | q     | d     | p                          | q                        | d     | p       | q | d | p                     | q | d | p       | q | d |  |  |
| RPpos_265.144_7.14     | RP    | pos        | 7.14            | 265.1440   |            | 4    |          | 0.00062 | 0.04750                                 | 0.59  | 0.53  | 0.80   | 0.84  | 0.81  | 0.64                  | 0.20295 | 0.71904 | -0.49   | -0.58 | -0.53 | -0.48                      | -0.39                    | -0.30 | -0.54   |   |   |                       |   |   |         |   |   |  |  |
| HILICneg_265.1441_0.6  | HILIC | neg        | 0.6             | 265.1441   |            | 4    |          | 0.40664 | 0.71296                                 | 0.24  | 0.46  | 0.46   | 0.30  | 0.43  | -0.48                 | 0.04697 | 0.43342 | 0.56    | 0.34  | 0.51  | 0.85                       | 0.67                     | 0.39  | 0.47    |   |   |                       |   |   |         |   |   |  |  |
| RPneg_265.14413_8.285  | RP    | neg        | 8.285           | 265.1441   |            | 4    |          | 0.00012 | 0.02071                                 | 1.17  | 0.62  | 0.76   | 1.10  | 1.14  | 0.78                  | 0.08507 | 0.54143 | 0.40    | -0.19 | 0.09  | 0.23                       | 0.82                     | 0.25  | 1.31    |   |   |                       |   |   |         |   |   |  |  |
| RPneg_265.1474_8.611   | RP    | neg        | 8.611           | 265.1474   |            | 4    |          | 0.97662 | 0.99592                                 | 0.01  | -0.36 | -0.11  | 0.65  | 0.24  | -0.36                 | 0.13271 | 0.62919 | 0.61    | 0.38  | 0.41  | 0.61                       | 0.06                     | -0.26 | -1.14   |   |   |                       |   |   |         |   |   |  |  |
| HILICneg_265.1479_5.69 | HILIC | neg        | 5.69            | 265.1479   |            | 4    |          | 0.42996 | 0.73035                                 | 0.13  | 0.17  | 0.84   | 0.18  | 0.22  | -0.12                 | 0.05523 | 0.45749 | 0.39    | 0.59  | 0.67  | 0.51                       | 0.23                     | 0.42  | -0.82   |   |   |                       |   |   |         |   |   |  |  |
| HILICneg_265.1484_0.96 | HILIC | neg        | 0.96            | 265.1484   |            | 4    |          | 0.66930 | 0.86194                                 | 0.13  | 0.27  | 0.23   | 0.27  | 0.58  | -0.22                 | 0.75012 | 0.86174 | 0.2     | 0.48  | 0.03  | 0.29                       | -0.08                    | -0.36 |         |   |   |                       |   |   |         |   |   |  |  |
| HILICneg_265.1485_0.45 | HILIC | neg        | 0.45            | 265.1485   |            | 4    |          | 0.02210 | 0.26505                                 | 0.87  | 0.64  | 1.24   | 0.50  | 0.42  | 0.55                  | 0.07879 | 0.52748 | 1.00    | 1.77  | 1.20  | 0.48                       | 0.90                     | 1.27  | -0.12   |   |   |                       |   |   |         |   |   |  |  |
| HILICneg_265.1544_0.64 | HILIC | pos        | 0.64            | 265.1544   |            | 4    |          | 0.73918 | 0.89484                                 | -0.14 | 0.40  | 0.92   | -0.32 | -0.16 | 0.63                  | 0.27455 | 0.78470 | -0.29   | -0.32 | -0.06 | -0.42                      | 0.18                     | -0.56 | -0.26   |   |   |                       |   |   |         |   |   |  |  |
| RPpos_265.1545_2.13    | RP    | pos        | 2.13            | 265.1545   |            | 4    |          | 0.40293 | 0.71088                                 | -0.18 | -0.16 | -0.04  | -0.21 | -0.18 | -0.01                 | 0.94374 | 0.99197 | 0.02    | 0.09  | 0.04  | 0.10                       | -0.01                    | 0.00  | 0.06    |   |   |                       |   |   |         |   |   |  |  |
| HILICneg_265.1551_0.72 | HILIC | pos        | 0.72            | 265.1551   |            | 4    |          | 0.83179 | 0.93648                                 | -0.10 | 0.23  | 0.57   | 0.08  | 0.05  | 0.20                  | 0.00037 | 0.03077 | -0.54   | -0.25 | -0.41 | -0.68                      | -0.02                    | -0.61 | -0.58   |   |   |                       |   |   |         |   |   |  |  |
| HILICneg_265.1645_0.42 | HILIC | pos        | 0.42            | 265.1645   |            | 4    |          | 0.75062 | 0.90609                                 | 0.11  | 0.45  | 0.44   | 0.17  | 0.19  | 0.04                  | 0.42174 | 0.86946 | -0.42   | -0.12 | -0.18 | -0.37                      | -0.09                    | -0.52 | 0.55    |   |   |                       |   |   |         |   |   |  |  |
| RPpos_265.1799_8.77    | RP    | pos        | 8.77            | 265.1799   |            | 4    |          | 0.21035 | 0.55344                                 | -0.28 | 0.57  | 0.07   | -0.18 | -0.12 | 0.15                  | 0.97459 | 0.99690 | -0.02   | -0.17 | 0.24  | 0.31                       | -0.34                    | -0.52 | 0.55    |   |   |                       |   |   |         |   |   |  |  |
| HILICneg_265.8972_4.33 | HILIC | neg        | 4.33            | 265.8972   |            | 4    |          | 0.53011 | 0.79344                                 | -0.06 | 0.38  | 0.38   | -0.15 | 0.08  | 0.05                  | 0.01886 | 0.29189 | 0.32    | 0.10  | 0.24  | 0.36                       | 0.42                     | 0.15  | 0.25    |   |   |                       |   |   |         |   |   |  |  |
| HILICneg_265.915_5.69  | HILIC | neg        | 5.69            | 265.9150   |            | 4    |          | 0.68242 | 0.86845                                 | 0.09  | 0.18  | 0.27   | 0.88  | 0.03  | 0.03                  | 0.07987 | 0.53009 | 0.74    | 0.57  | 0.83  | 0.86                       | 0.81                     | 0.66  | -0.02   |   |   |                       |   |   |         |   |   |  |  |
| HILICneg_265.9404_1.46 | HILIC | neg        | 1.46            | 265.9404   |            | 4    |          | 0.69182 | 0.87346                                 | 0.00  | 0.17  | 0.69   | 0.55  | 0.02  | -0.30                 | 0.00128 | 0.06595 | 0.63    | 0.25  | 0.57  | 0.91                       | 0.54                     | 0.49  | 0.18    |   |   |                       |   |   |         |   |   |  |  |
| RPneg_265.98853_1.311  | RP    | neg        | 1.311           | 265.9885   |            | 4    |          | 0.90906 | 0.96628                                 | 0.02  | -0.17 | 1.11   | 0.20  | -0.21 | -0.45                 | 0.00167 | 0.07771 | 0.76    | 0.33  | 1.56  | 1.46                       | 1.01                     | 0.25  | -0.55   |   |   |                       |   |   |         |   |   |  |  |
| RPneg_265.98859_1.403  | RP    | neg        | 1.403           | 265.9886   |            | 4    |          | 0.67693 | 0.86589                                 | 0.10  | 0.14  | 1.23   | 0.16  | 0.18  | -0.57                 | 0.01659 | 0.27619 | 0.77    | 0.50  | 1.43  | 1.27                       | 0.71                     | 0.22  | -0.63   |   |   |                       |   |   |         |   |   |  |  |
| HILICpos_265.9942_0.94 | HILIC | pos        | 0.94            | 265.9942   |            | 4    |          | 0.56745 | 0.81268                                 | 0.09  | 0.14  | 0.29   | 0.27  | 0.30  | 0.32                  | 0.00803 | 0.19045 | -0.41   | -0.49 | -0.53 | -0.33                      | -0.28                    | -0.38 | -0.59   |   |   |                       |   |   |         |   |   |  |  |
| HILICneg_266.0042_6.41 | HILIC | neg        | 6.41            | 266.0042   |            | 4    |          | 0.18278 | 0.52858                                 | -0.31 | -0.17 | -0.12  | -0.18 | -0.37 | -0.17                 | 0.00176 | 0.07662 | -0.73   | -0.88 | -0.83 | -0.38                      | -0.77                    | -0.77 | -0.19   |   |   |                       |   |   |         |   |   |  |  |
| RPneg_266.0112_2.12    | RP    | pos        | 2.12            | 266.0112   |            | 4    |          | 0.63117 | 0.84979                                 | -0.14 | 0.11  | 1.20   | 0.02  | -0.30 | -0.69                 | 0.00264 | 0.10237 | 1.38    | 0.74  | 1.86  | 2.14                       | 1.77                     | 1.60  | 0.21    |   |   |                       |   |   |         |   |   |  |  |
| HILICneg_266.0372_5.62 | HILIC | neg        | 5.62            | 266.0372   |            | 4    |          | 0.12817 | 0.46431                                 | -0.37 | -0.20 | 0.07   | 0.19  | 0.28  | -0.12                 | 0.01374 | 0.24969 | -0.18   | -0.13 | -0.13 | 0.24                       | -0.25                    | -0.43 | -0.53   |   |   |                       |   |   |         |   |   |  |  |
| HILICneg_266.0885_4.94 | HILIC | neg        | 4.94            | 266.0885   |            | 4    |          | 0.69193 | 0.87350                                 | -0.12 | -0.05 | 0.05   | 0.04  | -0.18 | -0.81                 | 0.80358 | 0.96983 | -0.11   | -0.11 | -0.10 | 0.03                       | -0.07                    | -0.15 | -0.58   |   |   |                       |   |   |         |   |   |  |  |
| RPneg_266.08908_1.592  | RP    | neg        | 1.592           | 266.0891   |            | 4    |          | 0.95386 | 0.98326                                 | -0.13 | 0.09  | 0.07   | -0.12 | -0.22 | -0.53                 | 0.10201 | 0.57547 | -0.29   | -0.27 | -0.12 | -0.37                      | -0.27                    | -0.18 | -0.62   |   |   |                       |   |   |         |   |   |  |  |
| HILICneg_266.0897_1.37 | HILIC | neg        | 1.37            | 266.0897   |            | 4    |          | 0.68796 | 0.87133                                 | -0.19 | 0.04  | -0.01  | -0.16 | -0.35 | -0.40                 | 0.01955 | 0.29532 | -0.39   | -0.31 | -0.18 | -0.50                      | -0.35                    | -0.38 | -0.70   |   |   |                       |   |   |         |   |   |  |  |
| HILICpos_266.1131_1.64 | HILIC | pos        | 1.64            | 266.1131   |            | 4    |          | 0.18196 | 0.52785                                 | 0.38  | 0.49  | 0.63   | 0.46  | 0.47  | -0.10                 | 0.21011 | 0.72674 | 0.77    | 1.01  | 0.97  | 0.84                       | 0.93                     | 0.56  | -0.05   |   |   |                       |   |   |         |   |   |  |  |
| HILICpos_266.1384_1.38 | HILIC | pos        | 1.38            | 266.1384   |            | 4    |          | 0.96090 | 0.98616                                 | -0.05 | -0.03 | 0.04   | 0.05  | 0.05  | 0.60                  | 0.01163 | 0.22985 | -0.35   | -0.34 | -0.33 | -0.40                      | -0.28                    | -0.28 | -0.51   |   |   |                       |   |   |         |   |   |  |  |
| RPpos_266.1392_3.24    | RP    | pos        | 3.24            | 266.1392   |            | 4    |          | 0.58579 | 0.82162                                 | 0.06  | 0.05  | 0.17   | 0.21  | 0.07  | 0.48                  | 0.02735 | 0.34682 | -0.34   | -0.45 | -0.41 | -0.31                      | -0.17                    | -0.27 | -0.51   |   |   |                       |   |   |         |   |   |  |  |
| HILICpos_266.1521_5.92 | HILIC | pos        | 5.92            | 266.1521   |            | 4    |          | 0.54863 | 0.80347                                 | -0.11 | 0.42  | 0.34   | 0.10  | -0.22 | -0.15                 | 0.17796 | 0.69252 | 0.35    | 0.27  | 0.39  | 0.54                       | 0.26                     | 0.19  | 0.01    |   |   |                       |   |   |         |   |   |  |  |
| HILICpos_266.1599_0.69 | HILIC | pos        | 0.69            | 266.1599   |            | 4    |          | 0.37227 | 0.68818                                 | -0.11 | -0.15 | 0.56   | -0.09 | 0.39  | -0.04                 | 0.00009 | 0.01083 | 0.57    | 0.91  | 0.33  | 0.46                       | 0.91                     | 0.12  | 0.26    |   |   |                       |   |   |         |   |   |  |  |
| HILICpos_266.16_0.45   | HILIC | pos        | 0.45            | 266.1600   |            | 4    |          | 0.09416 | 0.42314                                 | -0.47 | 0.05  | -0.20  | -0.29 | 0.30  | -0.14                 | 0.94916 | 0.99332 | -0.05   | 0.71  | -0.28 | -0.29                      | 0.18                     | -0.03 | -0.25   |   |   |                       |   |   |         |   |   |  |  |
| RPpos_266.1602_4.46    | RP    | pos        | 4.46            | 266.1602   |            | 4    |          | 0.43913 | 0.73636                                 | -0.25 | -0.02 | 0.70   | -0.15 | 0.56  | 0.35                  | 0.99331 | 0.99904 | -0.08   | 0.58  | -0.01 | -0.18                      | -0.08                    | -0.10 | -0.29   |   |   |                       |   |   |         |   |   |  |  |
| RPpos_266.1605_3.98    | RP    | pos        | 3.98            | 266.1605   |            | 4    |          | 0.11447 | 0.45016                                 | -0.54 | -0.01 | 0.00   | -0.71 | 0.09  | 0.21                  | 0.28033 | 0.78924 | -0.16   | 0.22  | -0.71 | 0.30                       | -0.20                    | -0.09 | -0.64   |   |   |                       |   |   |         |   |   |  |  |
| RPpos_266.1721_10.97   | RP    | pos        | 10.97           | 266.1721   |            | 4    |          | 0.13623 | 0.44373                                 | -0.30 | 0.17  | 0.06   | 0.00  | -0.37 | -0.52                 | 0.65315 | 0.91447 | 0.30    | 1.35  | -0.31 | 0.54                       | 0.15                     | 0.16  | 0.60    |   |   |                       |   |   |         |   |   |  |  |
| RPpos_266.1723_11.07   | RP    | pos        | 11.07           | 266.1723   |            | 4    |          | 0.11336 | 0.44915                                 | -0.57 | -0.15 | -0.12  | -0.22 | -0.44 | -0.44                 | 0.58774 | 0.92614 | 0.34    | 1.23  | -0.31 | 0.54                       | 0.05                     | 0.19  | 0.76    |   |   |                       |   |   |         |   |   |  |  |
| RPpos_266.1723_7.59    | RP    | pos        | 7.59            | 266.1723   |            | 4    |          | 0.04581 | 0.33704                                 | -0.71 | -0.14 | -0.04  | -0.32 | -0.50 | -0.15                 | 0.91592 | 0.98777 | 0.04    | 1.98  | -0.25 | 0.75                       | -0.33                    | 0.35  | 0.31    |   |   |                       |   |   |         |   |   |  |  |
| HILICpos_266.1734_5.64 | HILIC | pos        | 5.64            | 266.1734   |            | 4    |          | 0.80236 | 0.92378                                 | -0.10 | 0.00  | 0.76   | 0.21  | -0.09 | -0.82                 | 0.01432 | 0.25496 | 0.34    | 0.63  | 0.00  | 0.59                       | 0.39                     | 0.18  | 0.07    |   |   |                       |   |   |         |   |   |  |  |
| HILICpos_266.2324_0.4  | HILIC | pos        | 0.4             | 266.2324   |            | 4    |          | 0.49959 | 0.77605                                 | 0.20  | 0.22  | 0.12   | 0.39  | 0.46  | 0.21                  | 0.13511 | 0.63284 | 0.70    | 0.77  | 1.33  | 1.09                       | 0.22                     | 0.58  | 0.20    |   |   |                       |   |   |         |   |   |  |  |
| RPpos_266.2327_8.11    | RP    | pos        | 8.11            | 266.2327   |            | 4    |          | 0.87024 | 0.95133                                 | 0.06  | 0.32  | 0.26   | 0.44  | 0.09  | -0.07                 | 0.24624 | 0.76227 | -0.47   | -0.25 | -0.13 | 0.03                       | -0.77                    | -0.22 | -0.27   |   |   |                       |   |   |         |   |   |  |  |
| RPpos_266.6387_10.04   | RP    | pos        | 10.04           | 266.6387   |            | 4    |          | 0.20290 | 0.54743                                 | -0.20 | 0.10  | 0.18   | -0.11 | -0.01 | -0.23                 | 0.77591 | 0.96495 | 0.10    | 0.15  | 0.11  | 0.09                       | 0.16                     | 0.08  | 0.30    |   |   |                       |   |   |         |   |   |  |  |
| RPpos_266.6396_9.9     | RP    | pos        | 9.9             | 266.6396   |            | 4    |          | 0.17419 | 0.51976                                 | -0.19 | 0.12  | -0.05  | 0.01  | -0.08 | -0.31                 | 0.52655 | 0.91004 | 0.22    | 0.26  | 0.22  | 0.16                       | 0.27                     | 0.12  | 0.40    |   |   |                       |   |   |         |   |   |  |  |
| HILICneg_266.7616_1.46 | HILIC | neg        | 1.46            | 266.7616   |            | 4    |          | 0.34532 | 0.66653                                 | -0.27 | 0.11  | -0.10  | 0.11  | -0.06 | 0.35                  | 0.97870 | 0.99726 | -0.01   | 0.48  | -1.18 | -0.51                      | 0.28                     | 0.62  | 0.08    |   |   |                       |   |   |         |   |   |  |  |
| HILICneg_266.8267_0.53 | HILIC | neg        | 0.53            | 266.8267   |            | 4    |          | 0.41836 | 0.72212                                 | -0.15 | 0.05  | 0.23   | 0.34  | 0.15  | 0.58                  | 0.92274 | 0.98898 | -0.03   | 0.08  | -0.29 | -0.06                      | 0.08                     | 0.16  | -0.07   |   |   |                       |   |   |         |   |   |  |  |
| RPneg_266.83447_9.747  | RP    | neg        | 9.747           | 266.8345   |            | 4    |          | 0.14913 | 0.49169                                 | -0.14 | -0.02 | -0.05  | -0.33 | 0.09  | -0.15                 | 0.39965 | 0.85797 | -0.13   | -0.14 | -0.07 | -0.15                      | -0.15                    | -0.20 | -0.06   |   |   |                       |   |   |         |   |   |  |  |
| HILICneg_266.8883_0.41 | HILIC | neg        | 0.41            | 266.8883   |            | 4    |          | 0.61070 | 0.83369                                 | -0.10 | 0.09  | 0.12   | 0.17  | 0.24  | -0.05                 | 0.25191 | 0.76793 | 0.12    | 0.22  | 0.15  | -0.01                      | 0.16                     | 0.21  | 0.07    |   |   |                       |   |   |         |   |   |  |  |
| RPneg_266.88846_8.866  | RP    | neg        | 8.866           | 266.8885   |            | 4    |          | 0.66697 | 0.86056                                 | -0.10 |       |        |       |       |                       |         |         |         |       |       |                            |                          |       |         |   |   |                       |   |   |         |   |   |  |  |



| Feature_ID             | Mode  | Ionization | Average_Rt.min. | Average_Mz | Metabolite | MSMS | ID_Level | HMDB_ID | IV-Alcohol self-administration (IV-ASA) |         |       |       |       |                       |       |       |         |         | IV-Alcohol clamp (IV-AC)   |       |       |       |       |                       |       |      |   |   |
|------------------------|-------|------------|-----------------|------------|------------|------|----------|---------|-----------------------------------------|---------|-------|-------|-------|-----------------------|-------|-------|---------|---------|----------------------------|-------|-------|-------|-------|-----------------------|-------|------|---|---|
|                        |       |            |                 |            |            |      |          |         | Area Under the Curve (AUC)              |         |       |       |       | IV-Ghrelin or Placebo |       |       |         |         | Area Under the Curve (AUC) |       |       |       |       | IV-Ghrelin or Placebo |       |      |   |   |
|                        |       |            |                 |            |            |      |          |         | Baseline                                |         |       |       |       | BrAC=0                |       |       |         |         | Baseline                   |       |       |       |       | Post-AC               |       |      |   |   |
|                        |       |            |                 |            |            |      |          |         | p                                       | q       | d     | d     | d     | d                     | d     | d     | d       | d       | p                          | q     | d     | d     | d     | d                     | d     | d    | d | d |
| HILICneg_268.9194_1.42 | HILIC | neg        | 1.42            | 268.9194   |            |      | 4        |         | 0.75661                                 | 0.90369 | -0.13 | -0.06 | 0.47  | -0.30                 | -0.05 | 1.20  | 0.45611 | 0.88432 | 0.19                       | -0.15 | 0.08  | 0.56  | 0.11  | 0.95                  | 0.88  | 0.46 |   |   |
| HILICneg_268.9636_4.33 | HILIC | neg        | 4.33            | 268.9636   |            |      | 4        |         | 0.99677                                 | 0.99873 | 0.03  | 0.20  | 0.45  | 0.00                  | 0.11  | -0.05 | 0.00133 | 0.06754 | 0.34                       | 0.30  | 0.32  | 0.45  | 0.43  | 0.31                  | -0.25 |      |   |   |
| RPneg_268.9778_1.907   | RP    | neg        | 1.907           | 268.9778   |            |      | 4        |         | 0.49443                                 | 0.77345 | 0.20  | 0.31  | 0.84  | 0.56                  | 0.75  | 0.13  | 0.13897 | 0.63902 | 0.24                       | 0.40  | 0.30  | -0.46 | 0.48  | 0.28                  | 0.14  |      |   |   |
| HILICpos_269.0432_0.86 | HILIC | pos        | 0.86            | 269.0432   |            |      | 4        |         | 0.11483                                 | 0.45035 | 0.33  | 0.40  | 1.32  | 0.51                  | 0.22  | -0.33 | 0.03080 | 0.36605 | 0.66                       | -0.25 | 0.43  | 0.11  | 0.95  | 0.88                  | 0.46  |      |   |   |
| RPneg_269.0483_7.027   | RP    | neg        | 7.027           | 269.0483   |            |      | 4        |         | 0.14248                                 | 0.56115 | -0.13 | -0.02 | -0.06 | -0.11                 | 0.61  | 0.65  | 0.02446 | 0.79142 | -0.08                      | -0.08 | 0.12  | -0.16 | -0.11 | -0.03                 | -0.28 |      |   |   |
| HILICneg_269.0541_3.34 | HILIC | neg        | 3.34            | 269.0541   |            |      | 4        |         | 0.71499                                 | 0.88406 | 0.02  | 0.09  | 0.13  | 0.10                  | 0.15  | 0.54  | 0.90973 | 0.95869 | 0.30                       | -0.16 | -0.06 | 0.66  | 0.59  | 0.06                  | 0.13  |      |   |   |
| RPneg_269.0778_7.604   | RP    | neg        | 7.604           | 269.0778   |            |      | 4        |         | 0.53721                                 | 0.79713 | -0.03 | 0.03  | 0.03  | -0.03                 | 0.04  | -0.13 | 0.33455 | 0.82286 | 0.50                       | 0.59  | 0.51  | 0.50  | 0.52  | 0.42                  | 0.56  |      |   |   |
| RPneg_269.10114_7.681  | RP    | neg        | 7.681           | 269.1011   |            |      | 4        |         | 0.67760                                 | 0.86612 | -0.13 | 0.19  | 0.18  | 0.19                  | 0.26  | 0.14  | 0.08982 | 0.55360 | -0.31                      | -0.29 | -0.05 | 0.15  | -0.30 | -0.32                 | -0.30 |      |   |   |
| HILICpos_269.124_5.97  | HILIC | pos        | 5.97            | 269.1240   |            |      | 4        |         | 0.13810                                 | 0.47769 | 0.16  | 0.14  | 0.33  | 0.18                  | 0.27  | 0.63  | 0.02294 | 0.31915 | 0.05                       | -0.10 | 0.02  | 0.03  | 0.03  | 0.08                  | 0.24  |      |   |   |
| HILICneg_269.1309_2.33 | HILIC | neg        | 2.33            | 269.1309   |            |      | 4        |         | 0.65493                                 | 0.85511 | 0.01  | 0.07  | 0.25  | 0.44                  | 0.07  | 0.05  | 0.20631 | 0.72265 | 0.01                       | -0.31 | 0.08  | -0.04 | 0.11  | 0.21                  | -0.12 |      |   |   |
| HILICneg_269.1315_0.96 | HILIC | neg        | 0.96            | 269.1315   |            |      | 4        |         | 0.61007                                 | 0.83350 | -0.14 | 0.22  | -0.15 | 0.01                  | 0.37  | -0.42 | 0.40185 | 0.85869 | -0.13                      | -0.32 | -0.10 | 0.07  | -0.10 | -0.10                 | -0.54 |      |   |   |
| RPpos_269.1387_8.76    | RP    | pos        | 8.76            | 269.1387   |            |      | 4        |         | 0.40435                                 | 0.71182 | -0.14 | -0.11 | -0.04 | -0.14                 | 0.09  | -0.01 | 0.25401 | 0.76928 | 0.14                       | 0.12  | 0.12  | 0.06  | 0.11  | 0.16                  | 0.30  |      |   |   |
| RPneg_269.1387_11.543  | RP    | neg        | 11.543          | 269.1388   |            |      | 4        |         | 0.22424                                 | 0.56674 | -0.19 | -0.34 | -0.21 | 0.31                  | -0.08 | 0.70  | 0.81109 | 0.97162 | -0.10                      | -0.22 | 0.06  | -0.04 | -0.43 | 0.16                  | 0.45  |      |   |   |
| RPneg_269.1394_4.696   | RP    | neg        | 4.696           | 269.1394   |            |      | 4        |         | 0.43561                                 | 0.73382 | 0.11  | -0.13 | 0.32  | 0.43                  | 0.09  | -0.37 | 0.22914 | 0.74609 | 0.39                       | -0.13 | 0.16  | 0.40  | 0.51  | 0.57                  | 0.42  |      |   |   |
| HILICneg_269.1502_1.35 | HILIC | neg        | 1.35            | 269.1502   |            |      | 4        |         | 0.76632                                 | 0.90846 | -0.03 | -0.03 | 0.10  | -0.03                 | 0.16  | -0.11 | 0.00041 | 0.03231 | 0.90                       | 0.91  | 0.76  | 0.75  | 1.11  | 0.83                  | 0.66  |      |   |   |
| RPneg_269.15067_5.791  | RP    | neg        | 5.791           | 269.1507   |            |      | 4        |         | 0.84118                                 | 0.94031 | -0.01 | -0.09 | 0.10  | 0.03                  | 0.24  | -0.08 | 0.00112 | 0.06122 | 0.78                       | 0.87  | 0.78  | 0.75  | 0.93  | 0.45                  | 0.87  |      |   |   |
| RPneg_269.151_6.182    | RP    | neg        | 6.182           | 269.1510   |            |      | 4        |         | 0.09771                                 | 0.42769 | 0.79  | -0.26 | 0.59  | 0.61                  | 1.63  | 0.76  | 0.7894  | 0.52781 | 0.62                       | 0.56  | 0.64  | 0.61  | 0.53  | 0.25                  | 0.73  |      |   |   |
| HILICpos_269.1613_5.64 | HILIC | pos        | 5.64            | 269.1613   |            |      | 4        |         | 0.18739                                 | 0.53394 | 0.24  | 0.24  | 0.90  | 0.01                  | 0.27  | 1.24  | 0.20006 | 0.71591 | 0.20                       | 0.01  | 0.38  | 0.59  | 0.16  | 0.30                  | -0.34 |      |   |   |
| RPneg_269.21179_10.3   | RP    | neg        | 10.3            | 269.2118   |            |      | 4        |         | 0.45933                                 | 0.75064 | -0.18 | 0.26  | 0.32  | 0.17                  | 0.61  | -0.35 | 0.79066 | 0.96727 | 0.02                       | -0.02 | -0.45 | -0.16 | 0.16  | 0.31                  | 0.89  |      |   |   |
| RPneg_269.21228_10.037 | RP    | neg        | 10.037          | 269.2123   |            |      | 4        |         | 0.17073                                 | 0.51587 | -0.27 | -0.19 | -0.36 | -0.06                 | 0.35  | -0.34 | 0.43905 | 0.87778 | 0.28                       | 0.43  | 1.23  | 1.13  | 0.54  | 0.23                  | -0.14 |      |   |   |
| HILICpos_269.2256_0.38 | HILIC | pos        | 0.38            | 269.2256   |            |      | 4        |         | 0.41224                                 | 0.71718 | -0.14 | 0.22  | 0.33  | 0.02                  | 0.04  | -0.29 | 0.01926 | 0.29366 | -0.55                      | -0.77 | -0.41 | -0.44 | -0.22 | -0.41                 | -0.48 |      |   |   |
| RPneg_269.24896_11.315 | RP    | neg        | 11.315          | 269.2490   |            |      | 4        |         | 0.63114                                 | 0.84379 | -0.15 | -0.21 | 0.12  | 0.50                  | 0.05  | 0.47  | 0.51964 | 0.90863 | -0.12                      | -0.15 | -0.23 | -0.32 | -0.10 | -0.10                 | 0.47  |      |   |   |
| RPneg_269.24905_11.248 | RP    | neg        | 11.248          | 269.2491   |            |      | 4        |         | 0.93426                                 | 0.97639 | 0.03  | 0.51  | 0.02  | 0.51                  | 0.84  | 0.21  | 0.26805 | 0.78031 | -0.21                      | -0.05 | -0.25 | -0.16 | -0.46 | 0.03                  | 0.09  |      |   |   |
| RPpos_269.6153_9.96    | RP    | pos        | 9.96            | 269.6153   |            |      | 4        |         | 0.57242                                 | 0.81532 | -0.09 | -0.01 | 0.05  | -0.01                 | 0.07  | -0.08 | 0.78134 | 0.96582 | 0.12                       | 0.02  | 0.11  | 0.23  | 0.48  | 0.31                  | -0.13 |      |   |   |
| RPpos_269.6448_10.17   | RP    | pos        | 10.17           | 269.6448   |            |      | 4        |         | 0.01395                                 | 0.22423 | -0.57 | -0.26 | -0.18 | -0.52                 | -0.68 | -0.14 | 0.21151 | 0.72848 | -0.33                      | -0.08 | -0.45 | -0.46 | -0.28 | -0.07                 | -0.23 |      |   |   |
| RPpos_269.6448_9.87    | RP    | pos        | 9.87            | 269.6448   |            |      | 4        |         | 0.13160                                 | 0.46886 | -0.34 | -0.04 | -0.14 | -0.14                 | -0.32 | -0.15 | 0.15395 | 0.65956 | -0.37                      | -0.40 | -0.56 | -0.49 | -0.22 | -0.42                 | -0.24 |      |   |   |
| RPneg_269.83734_10.611 | RP    | neg        | 10.611          | 269.8373   |            |      | 4        |         | 0.35763                                 | 0.67670 | 0.25  | -0.05 | 0.35  | 0.70                  | 0.24  | 0.39  | 0.68069 | 0.94775 | -0.19                      | -0.42 | 0.01  | -0.36 | 0.14  | -0.21                 | -0.55 |      |   |   |
| RPneg_269.83752_10.522 | RP    | neg        | 10.522          | 269.8375   |            |      | 4        |         | 0.79611                                 | 0.92106 | -0.03 | 0.03  | 0.02  | 0.27                  | 0.21  | 0.48  | 0.46720 | 0.88846 | -0.01                      | -0.08 | 0.03  | 0.26  | -0.23 | 0.00                  | 0.04  |      |   |   |
| RPneg_269.83765_7.432  | RP    | neg        | 7.432           | 269.8377   |            |      | 4        |         | 0.74106                                 | 0.89618 | 0.01  | -0.20 | -0.31 | 0.26                  | 0.96  | 0.51  | 0.47230 | 0.89137 | -0.29                      | 0.24  | -0.06 | 0.73  | 0.03  | -0.03                 | -0.22 |      |   |   |
| RPneg_269.83765_9.326  | RP    | neg        | 9.326           | 269.8377   |            |      | 4        |         | 0.31689                                 | 0.64428 | 0.28  | 0.01  | 0.98  | 0.34                  | 0.40  | 0.03  | 0.79624 | 0.96830 | 0.18                       | -0.16 | 0.18  | 0.86  | -0.01 | -0.41                 | -0.19 |      |   |   |
| HILICneg_269.8886_0.48 | HILIC | neg        | 0.48            | 269.8886   |            |      | 4        |         | 0.06238                                 | 0.36949 | 0.51  | 0.48  | 0.85  | 0.39                  | 0.42  | 0.86  | 0.04200 | 0.41487 | -0.64                      | -0.50 | -0.71 | -0.42 | -0.65 | -0.75                 | -0.46 |      |   |   |
| RPneg_269.8887_0.71    | RP    | neg        | 3.73            | 269.8887   |            |      | 4        |         | 0.13096                                 | 0.36788 | 0.38  | 0.27  | 0.51  | 0.35                  | 0.27  | 0.66  | 0.90736 | 0.96988 | 0.03                       | 0.14  | 0.02  | -0.14 | 0.10  | 0.06                  | 0.12  |      |   |   |
| HILICneg_269.9376_4.1  | HILIC | neg        | 5.51            | 269.9376   |            |      | 4        |         | 0.02961                                 | 0.29162 | -0.28 | -0.06 | -0.22 | -0.27                 | -0.36 | 0.03  | 0.04363 | 0.41337 | 0.45                       | -0.06 | -0.55 | 0.43  | 0.46  | 0.32                  | 0.58  |      |   |   |
| HILICneg_269.9605_0.57 | HILIC | neg        | 0.57            | 269.9605   |            |      | 4        |         | 0.51846                                 | 0.78719 | 0.16  | 0.35  | 1.07  | 0.28                  | 0.14  | 0.09  | 0.81386 | 0.97170 | 0.00                       | 0.00  | -0.18 | -0.47 | 0.28  | 0.39                  | 0.35  |      |   |   |
| HILICneg_269.9605_0.57 | HILIC | neg        | 0.57            | 269.9605   |            |      | 4        |         | 0.36294                                 | 0.68095 | 0.19  | 0.28  | 0.28  | 0.60                  | 0.09  | 0.34  | 0.01805 | 0.28712 | -0.07                      | -0.20 | -0.08 | -0.14 | -0.08 | -0.08                 | 0.36  |      |   |   |
| HILICneg_269.9777_1.5  | HILIC | neg        | 1.5             | 269.9777   |            |      | 4        |         | 0.13793                                 | 0.47766 | 0.56  | 0.43  | 0.43  | 0.37                  | 0.94  | 1.26  | 0.79684 | 0.96859 | 0.08                       | -0.16 | -0.08 | -0.22 | 0.09  | 0.46                  | 0.32  |      |   |   |
| HILICneg_269.9999_5.85 | HILIC | neg        | 5.85            | 269.9999   |            |      | 4        |         | 0.96035                                 | 0.98600 | 0.05  | 0.27  | 0.63  | 0.35                  | 0.36  | -0.79 | 0.04193 | 0.41487 | 1.10                       | 0.87  | 1.23  | 1.22  | 1.43  | 0.43                  | -0.13 |      |   |   |
| HILICneg_270.011_5.69  | HILIC | neg        | 5.69            | 270.0110   |            |      | 4        |         | 0.72940                                 | 0.88974 | 0.09  | 0.14  | 0.73  | 0.31                  | 0.09  | -0.13 | 0.06321 | 0.48798 | 0.38                       | 0.35  | 0.20  | 0.80  | 0.38  | 0.54                  | -0.83 |      |   |   |
| HILICneg_270.0458_4.83 | HILIC | neg        | 4.83            | 270.0458   |            |      | 4        |         | 0.54811                                 | 0.80311 | -0.09 | 0.30  | 0.44  | 0.16                  | -0.11 | -0.22 | 0.21488 | 0.73129 | -0.46                      | -0.27 | -0.67 | -0.35 | 0.14  | -0.69                 | 0.03  |      |   |   |
| HILICneg_270.0461_4.36 | HILIC | neg        | 4.36            | 270.0461   |            |      | 4        |         | 0.04403                                 | 0.33333 | -0.17 | 0.25  | 0.16  | -0.07                 | -0.07 | -0.22 | 0.19295 | 0.70820 | -0.22                      | -0.18 | -0.53 | -0.20 | 0.12  | -0.20                 | -0.04 |      |   |   |
| RPneg_270.05594_8.37   | RP    | neg        | 8.37            | 270.0559   |            |      | 4        |         | 0.00381                                 | 0.12641 | 1.06  | 0.91  | 1.65  | 1.36                  | 0.65  | 0.37  | 0.01092 | 0.22216 | 0.94                       | 0.59  | 0.88  | 1.32  | 0.96  | 0.72                  | 0.21  |      |   |   |
| HILICpos_270.1231_0.67 | HILIC | pos        | 0.67            | 270.1231   |            |      | 4        |         | 0.01943                                 | 0.25371 | -0.48 | -0.20 | -0.19 | -0.26                 | -0.12 | -0.34 | 0.31088 | 0.80886 | -0.38                      | 0.88  | 0.40  | -0.53 | 0.01  | 0.30                  | -0.33 |      |   |   |
| HILICpos_270.1543_2.11 | HILIC | pos        | 2.11            | 270.1543   |            |      | 4        |         | 0.24361                                 | 0.58474 | 0.35  | 0.04  | 0.60  | 0.59                  | 0.86  | -0.01 | 0.85993 | 0.97965 | 0.04                       | 0.02  | 0.07  | 0.03  | 0.10  | -0.07                 | -0.14 |      |   |   |
| RPpos_270.1551_2.76    | RP    | pos        | 2.76            | 270.1551   |            |      | 4        |         | 0.52265                                 | 0.78920 | 0.25  | -0.16 | 0.15  | 0.66                  | 0.85  | -0.13 | 0.97167 | 0.99673 | -0.01                      | 0.20  | 0.00  | -0.08 | 0.08  | -0.16                 | -0.37 |      |   |   |
| RPpos_270.1551_3.09    | RP    | pos        | 3.09            | 270.1551   |            |      | 4        |         | 0.68075                                 | 0.86740 | 0.05  | 0.09  | 0.56  | 0.34                  | 0.49  | -0.09 | 0.80326 | 0.96982 | 0.08                       | -0.12 | 0.11  | 0.13  | 0.04  | 0.03                  | 0.02  |      |   |   |
| HILICpos_270.1908_0.56 | HILIC | pos        | 0.56            | 270.1908   |            |      | 4        |         | 0.85762                                 | 0.94644 | -0.06 | 0.20  | 0.34  | 0.23                  | 0.13  | -0.18 | 0.96442 | 0.99622 | -0.03                      | -0.12 | -0.04 | 0.03  | 0.49  | -0.20                 | 0.86  |      |   |   |
| RPneg_270.20731_8.532  | RP    | neg        | 8.532           | 270.2073   |            |      | 4        |         | 0.11198                                 | 0.44749 | -0.64 | -0.07 | 0.38  | -0.16                 | -0.46 | -0.50 | 0.72383 | 0.95590 | 0.13                       | 0.27  | -0.30 | 0.74  | -0.16 | 0.61                  | 0.70  |      |   |   |
| RPpos_270.6229_10.24   | RP    | pos        | 10.24           | 270.6229   |            |      | 4        |         | 0.94765                                 | 0.98073 | 0.05  | 0.10  | 0.29  | 0.16                  | 0.22  | 0.95  | 0.22682 | 0.74380 | 0.28                       | -0.07 | 0.23  | 0.54  | 0.33  | 0.43                  | 0.00  |      |   |   |

| Feature_ID               | Mode  | Ionization | Average_Rt.min. | Average_Mz | Metabolite | MSMS | ID_Level | HMDB_ID | IV-Alcohol self-administration (IV-ASA) |       |       |       |       |                       |       |         |         |       | IV-Alcohol clamp (IV-AC)   |       |       |       |       |                       |   |   |   |   |
|--------------------------|-------|------------|-----------------|------------|------------|------|----------|---------|-----------------------------------------|-------|-------|-------|-------|-----------------------|-------|---------|---------|-------|----------------------------|-------|-------|-------|-------|-----------------------|---|---|---|---|
|                          |       |            |                 |            |            |      |          |         | Area Under the Curve (AUC)              |       |       |       |       | IV-Ghrelin or Placebo |       |         |         |       | Area Under the Curve (AUC) |       |       |       |       | IV-Ghrelin or Placebo |   |   |   |   |
|                          |       |            |                 |            |            |      |          |         | Baseline                                |       |       |       |       | BrAC=0                |       |         |         |       | Baseline                   |       |       |       |       | Post-AC               |   |   |   |   |
|                          |       |            |                 |            |            |      |          |         | p                                       | q     | d     | d     | d     | d                     | d     | d       | d       | d     | p                          | q     | d     | d     | d     | d                     | d | d | d | d |
| HILICneg_271.8543_1.45   | HILIC | neg        | 1.45            | 271.8543   |            | 4    |          | 0.65891 | 0.85724                                 | 0.08  | 0.17  | 0.15  | -0.01 | 0.47                  | -0.25 | 0.41900 | 0.86713 | 0.09  | -0.16                      | 0.01  | 0.00  | 0.09  | 0.15  | 0.46                  |   |   |   |   |
| HILICneg_271.9739_6.29   | HILIC | neg        | 6.29            | 271.9739   |            | 4    |          | 0.66855 | 0.86159                                 | 0.10  | 0.20  | 0.65  | 0.41  | -0.06                 | -0.57 | 0.00502 | 0.14900 | 0.49  | 0.38                       | 0.55  | 0.99  | 0.39  | 0.08  | -0.50                 |   |   |   |   |
| HILICneg_271.9825_5.62   | HILIC | neg        | 5.62            | 271.9825   |            | 4    |          | 0.04761 | 0.34084                                 | -0.53 | -0.07 | -0.07 | -0.29 | -0.39                 | 0.36  | 0.25188 | 0.76793 | -0.42 | -0.25                      | -0.75 | -0.35 | -0.39 | -0.46 | 0.13                  |   |   |   |   |
| RPneg_271.98404_3.743    | RP    | neg        | 3.743           | 271.9840   |            | 4    |          | 0.63298 | 0.84427                                 | -0.15 | 0.71  | 0.34  | -0.09 | -0.27                 | 0.15  | 0.46389 | 0.88698 | 0.18  | 0.26                       | 0.75  | -0.01 | 0.41  | -0.12 | 0.06                  |   |   |   |   |
| HILICneg_271.9988_1.24   | HILIC | neg        | 1.24            | 271.9988   |            | 4    |          | 0.66560 | 0.85911                                 | 0.01  | 0.03  | -0.22 | -0.08 | 0.27                  | 0.02  | 0.84991 | 0.82794 | 0.32  | 0.27                       | 0.07  | -0.13 | 0.84  | 0.19  | 0.34                  |   |   |   |   |
| HILICneg_271.9989_0.73   | HILIC | neg        | 0.73            | 271.9989   |            | 4    |          | 0.06653 | 0.37877                                 | 0.51  | 0.14  | 0.23  | 0.41  | 1.31                  | 0.24  | 0.45563 | 0.88413 | 0.66  | 0.18                       | 0.73  | -0.27 | -0.11 | -0.18 | 0.46                  |   |   |   |   |
| RPneg_272.05396_4.734    | RP    | neg        | 4.734           | 272.0540   |            | 4    |          | 0.71597 | 0.88437                                 | 0.11  | 0.36  | 0.55  | 0.38  | 0.29                  | -0.04 | 0.03335 | 0.37577 | -0.07 | -0.17                      | -0.09 | -0.13 | 0.01  | -0.02 | 0.06                  |   |   |   |   |
| HILICneg_272.065_6.41    | HILIC | neg        | 6.41            | 272.0650   |            | 4    |          | 0.05021 | 0.34671                                 | -0.41 | 0.13  | -0.13 | -0.25 | -0.11                 | -0.77 | 0.94642 | 0.99263 | -0.05 | 0.27                       | 0.18  | 0.11  | -0.18 | -0.39 | -0.07                 |   |   |   |   |
| HILICneg_272.0866_6.22   | HILIC | neg        | 6.22            | 272.0866   |            | 4    |          | 0.43136 | 0.73095                                 | -0.15 | 0.09  | 0.41  | 0.12  | -0.32                 | -0.45 | 0.18666 | 0.70221 | 0.33  | 0.20                       | 0.53  | 0.78  | -0.14 | -0.14 | -0.02                 |   |   |   |   |
| RPneg_272.09964_5.918    | RP    | neg        | 5.918           | 272.0996   |            | 4    |          | 0.01076 | 0.20147                                 | -0.09 | 0.24  | 0.11  | -0.07 | -0.04                 | -0.32 | 0.54683 | 0.91644 | -0.10 | -0.09                      | -0.09 | -0.06 | -0.09 | -0.10 | -0.14                 |   |   |   |   |
| HILICpos_272.128_0.41    | HILIC | pos        | 0.41            | 272.1280   |            | 4    |          | 0.29143 | 0.62421                                 | 0.33  | 0.39  | 0.47  | 0.30  | 0.41                  | -0.19 | 0.02120 | 0.30778 | 2.16  | 1.52                       | 1.88  | 1.95  | 1.52  | 2.01  | 0.23                  |   |   |   |   |
| RPneg_272.16895_7.397    | RP    | neg        | 7.397           | 272.1690   |            | 4    |          | 0.95747 | 0.98490                                 | 0.05  | -0.11 | 0.16  | -0.07 | 0.64                  | 0.10  | 0.21148 | 0.72848 | 0.24  | -0.07                      | 0.14  | -0.03 | 0.63  | 0.70  | -0.14                 |   |   |   |   |
| HILICneg_272.1734_6.69   | HILIC | neg        | 6.69            | 272.1734   |            | 4    |          | 0.33940 | 0.66217                                 | -0.19 | -0.25 | -0.25 | -0.37 | 0.27                  | 0.51  | 0.26883 | 0.78107 | 0.61  | 0.01                       | 0.31  | 0.66  | 0.23  | 0.97  | 1.01                  |   |   |   |   |
| HILICpos_272.1855_1.03   | HILIC | pos        | 1.03            | 272.1855   |            | 4    |          | 0.62082 | 0.83900                                 | 0.07  | 0.16  | 0.10  | 0.43  | 0.45                  | -0.06 | 0.21116 | 0.72796 | 0.19  | 0.18                       | 0.35  | 0.20  | 0.15  | 0.28  | 0.03                  |   |   |   |   |
| HILICpos_272.1856_1.2    | HILIC | pos        | 1.2             | 272.1856   |            | 4    |          | 0.71938 | 0.88568                                 | 0.10  | 0.02  | -0.03 | 0.26  | 0.20                  | 0.54  | 0.99722 | 0.99953 | -0.05 | -0.20                      | -0.14 | -0.27 | 0.12  | 0.07  | 0.07                  |   |   |   |   |
| RPneg_272.1871_7.682     | RP    | neg        | 7.682           | 272.1871   |            | 4    |          | 0.19333 | 0.53883                                 | -0.35 | 0.14  | -0.03 | -0.25 | -0.32                 | -0.09 | 0.77508 | 0.96469 | 0.11  | 1.85                       | -0.23 | 1.19  | -0.14 | 0.71  | -0.29                 |   |   |   |   |
| RPpos_272.2217_11.03     | RP    | pos        | 11.03           | 272.2217   |            | 4    |          | 0.45825 | 0.74982                                 | -0.31 | -0.15 | 0.19  | 0.01  | -0.49                 | -0.50 | 0.73228 | 0.95803 | 0.13  | 2.55                       | -0.35 | 0.36  | 0.01  | 0.17  | 0.65                  |   |   |   |   |
| HILICpos_272.222_0.38    | HILIC | pos        | 0.38            | 272.2220   |            | 4    |          | 0.46875 | 0.75646                                 | -0.31 | -0.21 | 0.16  | -0.02 | -0.26                 | -0.64 | 0.71992 | 0.95336 | 0.14  | 1.75                       | -0.35 | 0.48  | -0.15 | 0.19  | 0.37                  |   |   |   |   |
| HILICneg_272.9312_6.16   | HILIC | neg        | 6.16            | 272.9312   |            | 4    |          | 0.99910 | 0.99966                                 | -0.01 | 0.15  | 0.33  | -0.23 | 0.33                  | 1.65  | 0.69896 | 0.95138 | 0.03  | -0.12                      | 2.10  | -0.15 | -0.61 | -0.30 | -0.19                 |   |   |   |   |
| HILICneg_272.95804_1.041 | HILIC | neg        | 1.041           | 272.9580   |            | 4    |          | 0.68661 | 0.87075                                 | -0.12 | 0.32  | 0.21  | -0.15 | -0.02                 | -0.14 | 0.76204 | 0.96276 | -0.06 | 0.16                       | 0.21  | -0.22 | 0.11  | -0.10 | -0.34                 |   |   |   |   |
| HILICneg_272.9586_7.39   | HILIC | neg        | 7.39            | 272.9586   |            | 4    |          | 0.22355 | 0.56607                                 | -0.45 | 0.38  | 0.26  | -0.45 | -0.05                 | 0.01  | 0.47301 | 0.89180 | 0.27  | 0.70                       | 0.58  | 0.19  | 0.32  | -0.16 | 0.11                  |   |   |   |   |
| HILICneg_272.9996_5.41   | HILIC | neg        | 5.41            | 272.9996   |            | 4    |          | 0.56076 | 0.80943                                 | 0.16  | 0.22  | 0.44  | 0.05  | 0.36                  | 0.70  | 0.13813 | 0.63835 | 0.03  | 0.00                       | -0.07 | 0.11  | 0.11  | 0.24  | -0.59                 |   |   |   |   |
| RPneg_273.00723_3.339    | RP    | neg        | 3.339           | 273.0072   |            | 4    |          | 0.61507 | 0.83589                                 | 0.08  | -0.07 | 0.49  | 0.27  | -0.09                 | -0.19 | 0.46007 | 0.88511 | 0.06  | -0.12                      | 0.03  | 0.20  | 0.19  | 0.06  | -0.18                 |   |   |   |   |
| HILICneg_273.0077_0.73   | HILIC | neg        | 0.73            | 273.0077   |            | 4    |          | 0.79164 | 0.91879                                 | 0.04  | -0.16 | 0.45  | 0.23  | -0.14                 | -0.20 | 0.69369 | 0.95008 | 0.02  | -0.15                      | -0.01 | 0.15  | 0.15  | 0.03  | -0.19                 |   |   |   |   |
| RPneg_273.00803_3.133    | RP    | neg        | 3.133           | 273.0080   |            | 4    |          | 0.89566 | 0.96214                                 | 0.01  | -0.13 | 0.44  | 0.13  | -0.15                 | -0.28 | 0.65014 | 0.93943 | 0.02  | -0.10                      | 0.00  | 0.21  | 0.05  | 0.01  | -0.22                 |   |   |   |   |
| HILICpos_273.0181_5.33   | HILIC | pos        | 5.33            | 273.0181   |            | 4    |          | 0.81653 | 0.93022                                 | 0.06  | 0.23  | 0.17  | 0.20  | 0.42                  | 0.43  | 0.17763 | 0.69242 | 0.07  | -0.46                      | 0.00  | 0.32  | 0.16  | 0.33  | -0.62                 |   |   |   |   |
| HILICneg_273.0192_4.92   | HILIC | neg        | 4.92            | 273.0192   |            | 4    |          | 0.05312 | 0.35250                                 | -0.47 | -0.14 | 0.13  | 0.01  | -0.08                 | -0.20 | 0.00313 | 0.11243 | 0.36  | 0.19                       | 0.71  | 0.28  | 0.17  | 0.17  | 0.45                  |   |   |   |   |
| HILICneg_273.0202_4.11   | HILIC | neg        | 4.11            | 273.0202   |            | 4    |          | 0.23789 | 0.57941                                 | -0.32 | -0.35 | 0.64  | 0.05  | -0.41                 | -0.75 | 0.47040 | 0.89059 | 0.23  | 0.02                       | -0.05 | 0.69  | 0.74  | 0.08  | -0.25                 |   |   |   |   |
| RPneg_273.0227_6.888     | RP    | neg        | 6.888           | 273.0227   |            | 4    |          | 0.27852 | 0.61324                                 | -0.04 | -0.04 | -0.03 | -0.10 | -0.05                 | 0.37  | 0.25217 | 0.76793 | 0.10  | 0.10                       | 0.21  | 0.04  | 0.06  | 0.11  | 0.20                  |   |   |   |   |
| RPneg_273.04398_5.306    | RP    | neg        | 5.306           | 273.0440   |            | 4    |          | 0.19187 | 0.53733                                 | 0.44  | 0.04  | 0.91  | 0.66  | 0.38                  | -0.53 | 0.30402 | 0.80438 | 0.50  | 0.10                       | 0.44  | 0.59  | 0.69  | 0.50  | -0.11                 |   |   |   |   |
| RPneg_273.04407_5.494    | RP    | neg        | 5.494           | 273.0441   |            | 4    |          | 0.33262 | 0.65636                                 | 0.23  | 0.01  | 0.42  | 0.30  | 0.45                  | 0.52  | 0.57533 | 0.92304 | -0.01 | -0.12                      | 0.05  | 0.06  | 0.01  | 0.16  | -0.17                 |   |   |   |   |
| HILICneg_273.0726_0.96   | HILIC | neg        | 0.96            | 273.0726   |            | 4    |          | 0.7052  | 0.68693                                 | 0.25  | 0.31  | 0.48  | 0.26  | 0.65                  | 0.57  | 0.74354 | 0.96041 | 0.12  | -0.03                      | 0.16  | 0.00  | 0.33  | 0.39  | -0.11                 |   |   |   |   |
| HILICpos_273.084_1.38    | HILIC | pos        | 1.38            | 273.0840   |            | 4    |          | 0.39486 | 0.78459                                 | -0.23 | 0.04  | 0.98  | -0.39 | -0.17                 | 0.48  | 0.34007 | 0.82361 | 0.57  | 0.69                       | 0.61  | -0.57 | 0.61  | 1.23  | -0.35                 |   |   |   |   |
| HILICpos_273.1082_5.91   | HILIC | pos        | 5.91            | 273.1082   |            | 4    |          | 0.67085 | 0.86288                                 | -0.10 | 0.22  | 0.01  | -0.02 | -0.03                 | -0.76 | 0.76002 | 0.96245 | -0.04 | 0.21                       | 0.15  | 0.28  | 0.00  | -0.33 | -0.67                 |   |   |   |   |
| RPneg_273.1127_9.34      | RP    | neg        | 9.34            | 273.1127   |            | 4    |          | 0.75377 | 0.90229                                 | 0.11  | 0.17  | 0.29  | 0.43  | 0.06                  | 0.37  | 0.95903 | 0.99539 | 0.00  | 0.04                       | 0.37  | 0.27  | 0.13  | -0.87 | 0.02                  |   |   |   |   |
| HILICpos_273.1211_3.6    | HILIC | pos        | 3.6             | 273.1211   |            | 4    |          | 0.72580 | 0.88831                                 | -0.10 | 0.01  | 0.15  | -0.02 | -0.08                 | -0.43 | 0.00000 | 0.00018 | 0.43  | 0.39                       | 0.41  | 0.53  | 0.47  | 0.36  | 0.18                  |   |   |   |   |
| RPneg_273.1243_5.605     | RP    | neg        | 5.605           | 273.1243   |            | 4    |          | 0.18622 | 0.53296                                 | 0.51  | 0.63  | 0.84  | 0.47  | 0.85                  | -0.23 | 0.18700 | 0.70221 | 0.94  | 1.24                       | 1.17  | 0.98  | 1.00  | 0.84  | 0.02                  |   |   |   |   |
| RPneg_273.12433_5.784    | RP    | neg        | 5.784           | 273.1243   |            | 4    |          | 0.27363 | 0.60932                                 | 0.46  | 0.59  | 0.86  | 0.44  | 0.71                  | -0.23 | 0.10244 | 0.57666 | 1.12  | 1.77                       | 1.32  | 1.49  | 1.05  | 0.99  | 0.03                  |   |   |   |   |
| RPneg_273.12433_5.913    | RP    | neg        | 5.913           | 273.1243   |            | 4    |          | 0.29284 | 0.62497                                 | 0.47  | 0.59  | 0.93  | 0.46  | 0.72                  | -0.23 | 0.14344 | 0.64563 | 1.02  | 1.45                       | 1.25  | 1.34  | 1.00  | 0.68  | 0.20                  |   |   |   |   |
| RPneg_273.13492_11.543   | RP    | neg        | 11.543          | 273.1349   |            | 4    |          | 0.52405 | 0.78980                                 | -0.17 | 0.12  | 0.34  | -0.12 | 0.26                  | 0.38  | 0.94383 | 0.99197 | -0.05 | -0.19                      | 0.19  | -0.25 | -0.26 | -0.14 | 0.17                  |   |   |   |   |
| RPpos_273.1695_8.56      | RP    | pos        | 8.56            | 273.1695   |            | 4    |          | 0.19623 | 0.54104                                 | 0.38  | 0.61  | 0.53  | 0.27  | 0.96                  | 0.23  | 0.00987 | 0.21165 | 0.96  | -0.30                      | 0.06  | -0.55 | -0.64 | -0.98 | -0.24                 |   |   |   |   |
| RPpos_273.206_8.39       | RP    | pos        | 8.39            | 273.2060   |            | 4    |          | 0.28407 | 0.61773                                 | -0.29 | 0.13  | 0.04  | 0.27  | 0.56                  | 0.11  | 0.50711 | 0.90372 | -0.19 | 0.45                       | -0.48 | 0.16  | -0.54 | 0.28  | -0.17                 |   |   |   |   |
| RPpos_273.2061_10.55     | RP    | pos        | 10.55           | 273.2061   |            | 4    |          | 0.50733 | 0.78065                                 | -0.24 | -0.03 | -0.07 | 0.43  | -0.03                 | 0.37  | 0.29927 | 0.80158 | -0.20 | -0.27                      | -0.36 | 0.01  | -0.38 | -0.19 | 0.10                  |   |   |   |   |
| RPpos_273.2062_9.79      | RP    | pos        | 9.79            | 273.2062   |            | 4    |          | 0.19537 | 0.54040                                 | 0.38  | 0.43  | 0.57  | 0.31  | 0.99                  | 0.20  | 0.18309 | 0.69898 | -0.46 | -0.15                      | 0.22  | -0.30 | -0.11 | -1.27 | -0.33                 |   |   |   |   |
| HILICpos_273.2175_5.21   | HILIC | pos        | 5.21            | 273.2175   |            | 4    |          | 0.21390 | 0.55636                                 | -0.28 | -0.13 | 0.06  | -0.08 | -0.21                 | 0.04  | 0.36532 | 0.83821 | 0.14  | -0.15                      | 0.11  | 0.14  | 0.43  | 0.05  | 0.23                  |   |   |   |   |
| RPpos_273.2208_6.98      | RP    | pos        | 6.98            | 273.2208   |            | 4    |          | 0.04150 | 0.32547                                 | -0.26 | -0.04 | -0.27 | -0.36 | -0.15                 | 0.14  | 0.64078 | 0.93638 | -0.16 | -0.03                      | 0.00  | 0.03  | -0.10 | -0.25 | -0.34                 |   |   |   |   |
| RPpos_273.2532_7.68      | RP    | pos        | 7.68            | 273.2532   |            | 4    |          | 0.20345 | 0.54794                                 | -0.33 | -0.04 | -0.04 | -0.36 | -0.33                 | -0.11 | 0.57725 | 0.94718 | 0.13  | 1.57                       | 0.20  | 0.15  | 0.13  | 0.59  | -0.38                 |   |   |   |   |
| RPpos_273.2578_10.37     | RP    | pos        | 10.37           | 273.2578   |            | 4    |          | 0.71228 | 0.88257                                 | 0.10  | 0.42  | 0.48  | 0.43  | 0.00                  | -0.43 | 0.00027 | 0.02376 | 1.30  | 0.85                       | 0.77  | 1.28  | 1.84  | 1.39  | 0.66                  |   |   |   |   |
| RPpos_273.6658_10.81     | RP    | pos        | 10.81           | 273.6658   |            | 4    |          | 0.03739 | 0.31416                                 | -0.47 | -0.06 | -0.14 | -0.41 | -0.43                 | -0.23 | 0.94546 | 0.99227 | 0.10  | 0.15                       | 0.09  | 0.11  | 0.23  | 0.01  | -0.03                 |   |   |   |   |
| HILICneg_273.7451_1.45   | HILIC | neg        | 1.45            | 273.7451   |            | 4    |          | 0.02742 | 0.28442                                 | -0.37 | -0.04 | -0.30 | -0.05 | -0.20                 | 0.17  |         |         |       |                            |       |       |       |       |                       |   |   |   |   |

| Feature_ID             | Mode  | Ionization | Average_Rt.min. | Average_Mz | Metabolite | MSMS | ID_Level | HMDB_ID | IV-Alcohol self-administration (IV-ASA) |       |        |       |        |       |                       |         |                       |       |        |       | IV-Alcohol clamp (IV-AC)   |       |         |       |                       |   |                       |   |  |  |  |  |
|------------------------|-------|------------|-----------------|------------|------------|------|----------|---------|-----------------------------------------|-------|--------|-------|--------|-------|-----------------------|---------|-----------------------|-------|--------|-------|----------------------------|-------|---------|-------|-----------------------|---|-----------------------|---|--|--|--|--|
|                        |       |            |                 |            |            |      |          |         | Area Under the Curve (AUC)              |       |        |       |        |       | IV-Ghrelin or Placebo |         |                       |       |        |       | Area Under the Curve (AUC) |       |         |       |                       |   | IV-Ghrelin or Placebo |   |  |  |  |  |
|                        |       |            |                 |            |            |      |          |         | Baseline                                |       | IV-ASA |       | BRAC=0 |       | Baseline              |         | IV-Ghrelin or Placebo |       | BRAC=0 |       | Baseline                   |       | Post-LD |       | IV-Ghrelin or Placebo |   | BRAC=0                |   |  |  |  |  |
|                        |       |            |                 |            |            |      |          |         | p                                       | q     | d      | d     | d      | d     | d                     | d       | d                     | d     | d      | d     | p                          | q     | d       | d     | d                     | d | d                     | d |  |  |  |  |
| RPneg_275.11359_11.54  | RP    | neg        | 11.54           | 275.1136   |            | 4    |          | 0.57902 | 0.81778                                 | -0.07 | 0.17   | 0.05  | -0.02  | 0.12  | -0.18                 | 0.85174 | 0.97755               | 0.08  | -0.10  | 0.01  | 0.03                       | 0.59  | -0.64   | 0.02  |                       |   |                       |   |  |  |  |  |
| RPneg_275.11374_4.607  | RP    | neg        | 4.607           | 275.1137   |            | 4    |          | 0.67660 | 0.86573                                 | 0.05  | -0.12  | -0.14 | -0.10  | 0.13  | -0.15                 | 0.16111 | 0.67081               | -0.32 | 0.47   | 0.77  | -0.25                      | -0.15 | -0.34   | -0.19 |                       |   |                       |   |  |  |  |  |
| HILICpos_275.1187_3.6  | HILIC | pos        | 3.6             | 275.1187   |            | 4    |          | 0.68145 | 0.86772                                 | -0.10 | 0.08   | 0.14  | -0.06  | -0.09 | -0.44                 | 0.00000 | 0.00009               | 0.46  | 0.41   | 0.47  | 0.50                       | 0.49  | 0.48    | 0.14  |                       |   |                       |   |  |  |  |  |
| HILICpos_275.1602_4.95 | HILIC | pos        | 4.95            | 275.1602   |            | 4    |          | 0.63808 | 0.84700                                 | 0.12  | 0.20   | 0.25  | 0.26   | 0.36  | -0.44                 | 0.15662 | 0.66394               | -0.58 | -0.54  | -0.45 | -0.57                      | -0.58 | -0.56   | -0.56 |                       |   |                       |   |  |  |  |  |
| RPpos_275.1641_10.42   | RP    | pos        | 10.42           | 275.1641   |            | 4    |          | 0.27294 | 0.60955                                 | 0.31  | 0.51   | 0.35  | 0.17   | 0.03  | 0.76                  | 0.80524 | 0.97065               | -0.17 | -0.19  | 0.89  | -0.25                      | -0.23 | -0.82   | -0.43 |                       |   |                       |   |  |  |  |  |
| RPpos_275.1987_10.05   | RP    | pos        | 10.05           | 275.1987   |            | 4    |          | 0.62261 | 0.83971                                 | 0.20  | 0.55   | 0.34  | 0.18   | 0.15  | 0.66061               | 0.66526 | -0.46                 | 0.46  | 0.30   | -0.43 | -0.42                      | 0.09  | 0.09    |       |                       |   |                       |   |  |  |  |  |
| RPneg_275.20151_10.543 | RP    | neg        | 10.543          | 275.2015   |            | 4    |          | 0.07370 | 0.39176                                 | 0.64  | 0.01   | 0.06  | 0.38   | 1.80  | -0.11                 | 0.42082 | 0.86683               | -0.25 | -0.12  | 0.24  | -0.09                      | -0.75 | -0.83   | -0.10 |                       |   |                       |   |  |  |  |  |
| RPpos_275.2042_10.81   | RP    | pos        | 10.81           | 275.2042   |            | 4    |          | 0.76758 | 0.90863                                 | -0.05 | 0.53   | -0.25 | 0.14   | 0.00  | 0.48                  | 0.25641 | 0.77187               | -0.21 | -0.46  | -0.25 | -0.43                      | -0.02 | 0.00    | -0.39 |                       |   |                       |   |  |  |  |  |
| RPpos_275.2586_10.42   | RP    | pos        | 10.42           | 275.2586   |            | 4    |          | 0.78203 | 0.91544                                 | -0.15 | 0.07   | 0.00  | 0.29   | 0.52  | 0.42                  | 0.02079 | 0.30493               | 0.30  | -0.20  | 0.34  | 0.37                       | 0.54  | 0.21    | 0.50  |                       |   |                       |   |  |  |  |  |
| RPpos_275.6257_10.04   | RP    | pos        | 10.04           | 275.6257   |            | 4    |          | 0.15495 | 0.49790                                 | -0.21 | 0.08   | -0.01 | -0.17  | 0.00  | -0.22                 | 0.79245 | 0.96742               | 0.10  | 0.30   | -0.04 | -0.01                      | 0.21  | 0.13    | 0.34  |                       |   |                       |   |  |  |  |  |
| RPpos_275.6445_8.82    | RP    | pos        | 8.82            | 275.6445   |            | 4    |          | 0.11352 | 0.44936                                 | -0.31 | -0.03  | -0.13 | -0.23  | -0.27 | -0.49                 | 0.01005 | 0.21292               | -0.13 | -0.12  | -0.12 | -0.12                      | -0.23 | -0.13   | 0.03  |                       |   |                       |   |  |  |  |  |
| RPneg_275.8483_6.845   | RP    | neg        | 6.845           | 275.8483   |            | 4    |          | 0.94292 | 0.97913                                 | 0.05  | 0.15   | 0.07  | 0.07   | 0.16  | 0.06                  | 0.26872 | 0.78099               | -0.20 | -0.22  | -0.13 | -0.30                      | -0.14 | -0.23   | -0.23 |                       |   |                       |   |  |  |  |  |
| RPneg_275.86096_9.086  | RP    | neg        | 9.086           | 275.8610   |            | 4    |          | 0.26809 | 0.60408                                 | 0.03  | 0.05   | 0.09  | 0.03   | 0.04  | 0.22                  | 0.95186 | 0.99379               | -0.05 | -0.09  | -0.01 | -0.04                      | -0.08 | -0.06   | -0.03 |                       |   |                       |   |  |  |  |  |
| HILICneg_275.9563_5.41 | HILIC | neg        | 5.41            | 275.9563   |            | 4    |          | 0.01800 | 0.24482                                 | -0.79 | -1.05  | -0.04 | -1.17  | 0.15  | 0.26                  | 0.85470 | 0.97834               | -0.24 | -0.07  | -0.26 | 0.05                       | -0.03 | 0.20    | -2.19 |                       |   |                       |   |  |  |  |  |
| RPpos_275.9958_5.2     | RP    | pos        | 5.2             | 275.9958   |            | 4    |          | 0.51231 | 0.78377                                 | 0.13  | 0.11   | 0.12  | 0.18   | 0.01  | 0.85                  | 0.31423 | 0.81205               | 0.09  | 0.00   | -0.03 | 0.14                       | 0.12  | 0.16    | 0.14  |                       |   |                       |   |  |  |  |  |
| RPneg_276.01691_1.312  | RP    | neg        | 1.312           | 276.0169   |            | 4    |          | 0.96055 | 0.98600                                 | 0.00  | -0.13  | 1.14  | 0.19   | -0.18 | -0.27                 | 0.00166 | 0.07771               | 0.47  | 0.19   | 1.04  | 1.00                       | 0.80  | 0.06    | -0.67 |                       |   |                       |   |  |  |  |  |
| RPneg_276.01694_1.404  | RP    | neg        | 1.404           | 276.0169   |            | 4    |          | 0.97082 | 0.98887                                 | 0.02  | 0.04   | 1.26  | 0.27   | -0.27 | -0.70                 | 0.03034 | 0.36379               | 0.63  | 0.40   | 1.18  | 1.47                       | 0.65  | 0.16    | -0.83 |                       |   |                       |   |  |  |  |  |
| RPneg_276.03375_5.505  | RP    | neg        | 5.505           | 276.0338   |            | 4    |          | 0.09352 | 0.42301                                 | -0.57 | -0.25  | 0.38  | -0.43  | -0.02 | -0.94                 | 0.57154 | 0.92183               | 0.14  | 0.40   | 0.32  | 0.22                       | 0.62  | -0.42   | -0.23 |                       |   |                       |   |  |  |  |  |
| RPpos_276.1804_10.92   | RP    | pos        | 10.92           | 276.1804   |            | 4    |          | 0.17922 | 0.52441                                 | -0.36 | 0.40   | -0.31 | -0.11  | 0.03  | -0.07                 | 0.74528 | 0.96070               | 0.09  | -0.15  | 0.25  | 0.66                       | -0.04 | 0.74    | -0.02 |                       |   |                       |   |  |  |  |  |
| HILICpos_276.1808_2.27 | HILIC | pos        | 2.27            | 276.1808   |            | 4    |          | 0.08032 | 0.40471                                 | 0.36  | 0.21   | 0.46  | 0.45   | 0.90  | 0.48                  | 0.11126 | 0.59315               | 0.40  | 0.41   | 0.46  | 0.39                       | 0.25  | 0.39    | 0.03  |                       |   |                       |   |  |  |  |  |
| HILICpos_276.181_1.34  | HILIC | pos        | 1.34            | 276.1810   |            | 4    |          | 0.15804 | 0.50108                                 | 0.81  | -1.25  | 0.88  | 1.03   | 0.76  | 0.72                  | 0.31471 | 0.81205               | -0.34 | -0.39  | -0.36 | -0.35                      | -0.34 | -0.26   | -0.19 |                       |   |                       |   |  |  |  |  |
| RPpos_276.1998_7.84    | RP    | pos        | 7.84            | 276.1998   |            | 4    |          | 0.95053 | 0.77937                                 | 0.20  | 0.25   | 0.37  | 0.27   | 0.51  | 0.00                  | 0.04044 | 0.40966               | 1.02  | 1.05   | 0.95  | 0.68                       | 1.29  | 1.18    | 0.45  |                       |   |                       |   |  |  |  |  |
| RPpos_276.6525_10.85   | RP    | pos        | 10.85           | 276.6525   |            | 4    |          | 0.14837 | 0.49070                                 | -0.28 | -0.05  | -0.09 | -0.05  | -0.21 | 0.09                  | 0.52661 | 0.91004               | -0.13 | -0.05  | -0.13 | -0.06                      | 0.33  | -0.41   | -0.31 |                       |   |                       |   |  |  |  |  |
| RPpos_276.6527_10.3    | RP    | pos        | 10.3            | 276.6527   |            | 4    |          | 0.01798 | 0.24482                                 | -0.41 | 0.08   | 0.00  | -0.36  | -0.23 | -0.35                 | 0.09374 | 0.56071               | -0.17 | -0.11  | -0.14 | -0.14                      | -0.15 | -0.12   | -0.20 |                       |   |                       |   |  |  |  |  |
| HILICneg_276.7127_0.92 | HILIC | neg        | 0.92            | 276.7127   |            | 4    |          | 0.49396 | 0.77320                                 | -0.20 | -0.33  | -0.22 | 0.13   | -0.28 | -0.25                 | 0.29790 | 0.79993               | -0.30 | -0.33  | -0.35 | -0.42                      | -0.15 | -0.21   | 0.18  |                       |   |                       |   |  |  |  |  |
| HILICneg_276.8677_0.92 | HILIC | neg        | 0.92            | 276.8677   |            | 4    |          | 0.05758 | 0.36190                                 | -0.36 | -0.37  | -0.34 | -0.33  | -0.38 | -0.24                 | 0.07855 | 0.52708               | -0.42 | -0.46  | -0.42 | -0.46                      | -0.33 | -0.42   | -0.25 |                       |   |                       |   |  |  |  |  |
| HILICneg_276.9507_1.42 | HILIC | neg        | 1.42            | 276.9507   |            | 4    |          | 0.56700 | 0.81262                                 | -0.20 | -0.14  | 0.30  | -0.39  | -0.09 | 1.70                  | 0.46647 | 0.88808               | 0.25  | -0.27  | -0.15 | 0.71                       | 0.55  | 1.02    | -0.42 |                       |   |                       |   |  |  |  |  |
| RPneg_276.9569_3.124   | RP    | neg        | 3.124           | 276.9567   |            | 4    |          | 0.75331 | 0.90215                                 | 0.09  | 0.20   | 0.16  | 0.24   | 0.17  | -0.33                 | 0.86851 | 0.98025               | -0.02 | -0.14  | 0.03  | -0.04                      | -0.06 | -0.03   | -0.08 |                       |   |                       |   |  |  |  |  |
| RPpos_277.0058_3.73    | RP    | pos        | 3.73            | 277.0058   |            | 4    |          | 0.19386 | 0.53936                                 | 0.37  | 0.21   | 0.47  | 0.40   | 0.33  | 0.48                  | 0.27356 | 0.78419               | -0.49 | -0.53  | -0.55 | -0.25                      | -0.45 | -0.50   | -0.38 |                       |   |                       |   |  |  |  |  |
| HILICneg_277.0072_0.96 | HILIC | neg        | 0.96            | 277.0072   |            | 4    |          | 0.93241 | 0.97583                                 | 0.01  | 0.29   | 0.07  | 0.21   | 0.28  | -0.13                 | 0.97612 | 0.99711               | 0.05  | 0.08   | 0.24  | 0.07                       | 0.05  | 0.03    | -0.14 |                       |   |                       |   |  |  |  |  |
| HILICneg_277.0074_4.92 | HILIC | neg        | 4.92            | 277.0074   |            | 4    |          | 0.64150 | 0.84812                                 | -0.10 | -0.10  | 0.16  | 0.50   | 0.31  | -0.76                 | 0.01866 | 0.29025               | 0.50  | 0.07   | 0.50  | 0.36                       | 0.37  | 1.01    | -0.15 |                       |   |                       |   |  |  |  |  |
| HILICneg_277.0075_4.11 | HILIC | neg        | 4.11            | 277.0075   |            | 4    |          | 0.93805 | 0.97750                                 | 0.01  | 0.17   | 0.96  | -0.22  | -0.24 | -0.70                 | 0.09036 | 0.55386               | 0.41  | 0.23   | 0.42  | 0.60                       | 0.68  | 0.02    | -0.08 |                       |   |                       |   |  |  |  |  |
| HILICneg_277.0131_7.18 | HILIC | neg        | 7.18            | 277.0131   |            | 4    |          | 0.37206 | 0.68803                                 | 0.20  | 0.44   | 0.70  | -0.10  | -0.10 | -0.02                 | 0.09338 | 0.50560               | 0.06  | -0.08  | 0.17  | 0.19                       | 0.12  | 0.03    | -0.19 |                       |   |                       |   |  |  |  |  |
| HILICneg_277.0149_4.21 | HILIC | neg        | 4.21            | 277.0149   |            | 4    |          | 0.16447 | 0.50992                                 | -0.25 | 0.37   | 0.60  | -0.10  | -0.57 | -0.49                 | 0.88191 | 0.98281               | -0.04 | -0.14  | 0.09  | 0.17                       | 0.15  | -0.31   | -0.34 |                       |   |                       |   |  |  |  |  |
| RPneg_277.0178_7.032   | RP    | neg        | 7.032           | 277.0179   |            | 4    |          | 0.13919 | 0.47872                                 | 0.08  | -0.01  | 0.10  | 0.02   | 0.08  | 0.57                  | 0.19882 | 0.71469               | 0.00  | -0.02  | -0.05 | 0.08                       | 0.00  | 0.07    | -0.04 |                       |   |                       |   |  |  |  |  |
| RPneg_277.02124_5.823  | RP    | neg        | 5.823           | 277.0212   |            | 4    |          | 0.02481 | 0.27612                                 | 0.57  | 0.22   | 0.93  | 0.46   | 0.53  | 1.89                  | 0.48178 | 0.89519               | 0.31  | 0.32   | 0.37  | 0.31                       | 0.41  | 0.16    | -0.16 |                       |   |                       |   |  |  |  |  |
| RPneg_277.03012_7.732  | RP    | neg        | 7.732           | 277.0301   |            | 4    |          | 0.73589 | 0.89350                                 | 0.06  | 0.43   | 0.52  | -0.24  | 0.69  | 0.10                  | 0.17039 | 0.68268               | 0.41  | -0.37  | 0.28  | 0.08                       | 0.42  | 0.55    | 1.26  |                       |   |                       |   |  |  |  |  |
| HILICneg_277.0522_0.89 | HILIC | neg        | 0.89            | 277.0522   |            | 4    |          | 0.18816 | 0.53406                                 | 0.28  | 0.30   | 0.40  | 0.25   | 0.41  | 1.11                  | 0.86067 | 0.97971               | 0.03  | -0.13  | -0.02 | -0.22                      | 0.06  | 0.14    | 0.39  |                       |   |                       |   |  |  |  |  |
| HILICneg_277.0545_2.33 | HILIC | neg        | 2.33            | 277.0545   |            | 4    |          | 0.43143 | 0.73098                                 | -0.04 | 0.26   | 0.24  | 0.23   | 0.25  | 0.04                  | 0.16587 | 0.67711               | -0.14 | 0.01   | -0.19 | -0.26                      | -0.07 | -0.06   | -0.07 |                       |   |                       |   |  |  |  |  |
| RPneg_277.08594_2.03   | RP    | neg        | 2.03            | 277.0859   |            | 4    |          | 0.76780 | 0.90872                                 | 0.09  | 0.37   | 0.65  | 0.05   | -0.01 | -0.37                 | 0.00019 | 0.01968               | 0.56  | 0.35   | 0.65  | 0.71                       | 0.53  | 0.47    | -0.09 |                       |   |                       |   |  |  |  |  |
| HILICneg_277.0864_6.21 | HILIC | neg        | 6.21            | 277.0864   |            | 4    |          | 0.27720 | 0.61667                                 | 0.21  | 0.27   | 0.89  | 0.08   | 0.18  | -0.33                 | 0.00076 | 0.04774               | 0.52  | 0.25   | 0.62  | 0.85                       | 0.45  | 0.42    | -0.27 |                       |   |                       |   |  |  |  |  |
| HILICpos_277.0891_5.45 | HILIC | pos        | 5.45            | 277.0891   |            | 4    |          | 0.11159 | 0.44700                                 | 0.41  | 0.11   | 0.77  | 0.65   | 0.54  | -0.01                 | 0.06872 | 0.50268               | 0.31  | -0.09  | -0.03 | 0.55                       | 0.88  | 0.77    | -0.23 |                       |   |                       |   |  |  |  |  |
| HILICpos_277.1183_5.21 | HILIC | pos        | 5.21            | 277.1183   |            | 4    |          | 0.96930 | 0.98851                                 | 0.06  | -0.14  | 1.00  | 0.09   | -0.03 | 0.30                  | 0.27589 | 0.78622               | 0.23  | -0.09  | -0.17 | -0.12                      | 1.04  | 0.19    | 0.52  |                       |   |                       |   |  |  |  |  |
| HILICpos_277.1429_0.42 | HILIC | pos        | 0.42            | 277.1429   |            | 4    |          | 0.04282 | 0.33008                                 | 0.80  | 0.53   | 0.88  | 1.48   | 0.79  | 0.20                  | 0.01619 | 0.27228               | -0.67 | -0.72  | -0.61 | -0.62                      | -0.71 | -0.53   | -0.36 |                       |   |                       |   |  |  |  |  |
| RPneg_277.1442_9.937   | RP    | neg        | 9.937           | 277.1442   |            | 4    |          | 0.53681 | 0.                                      |       |        |       |        |       |                       |         |                       |       |        |       |                            |       |         |       |                       |   |                       |   |  |  |  |  |

| Feature_ID               | Mode  | Ionization | Average_Rt.min. | Average_Mz | Metabolite | MSMS | ID_Level | HMDB_ID | IV-Alcohol self-administration (IV-ASA) |         |       |       |       |                       |       |       |         |         | IV-Alcohol clamp (IV-AC)   |       |       |       |       |                       |       |   |   |   |
|--------------------------|-------|------------|-----------------|------------|------------|------|----------|---------|-----------------------------------------|---------|-------|-------|-------|-----------------------|-------|-------|---------|---------|----------------------------|-------|-------|-------|-------|-----------------------|-------|---|---|---|
|                          |       |            |                 |            |            |      |          |         | Area Under the Curve (AUC)              |         |       |       |       | IV-Ghrelin or Placebo |       |       |         |         | Area Under the Curve (AUC) |       |       |       |       | IV-Ghrelin or Placebo |       |   |   |   |
|                          |       |            |                 |            |            |      |          |         | Baseline                                |         |       |       |       | BrAC=0                |       |       |         |         | Baseline                   |       |       |       |       | Post-LD               |       |   |   |   |
|                          |       |            |                 |            |            |      |          |         | p                                       | q       | d     | d     | d     | d                     | d     | d     | d       | d       | p                          | q     | d     | d     | d     | d                     | d     | d | d | d |
| RPneg_279.1268_6.052     | RP    | neg        | 6.052           |            |            |      | 4        |         | 0.44965                                 | 0.74351 | 0.27  | -0.11 | 0.48  | 0.32                  | 0.61  | 0.55  | 0.84542 | 0.97701 | -0.09                      | -0.08 | 0.00  | -0.37 | 0.01  | -0.19                 | -0.06 |   |   |   |
| RPneg_279.12714_8.967    | RP    | neg        | 8.967           |            |            |      | 4        |         | 0.15509                                 | 0.49790 | -0.38 | 0.18  | -0.11 | -0.14                 | -0.13 | -0.29 | 0.53343 | 0.91301 | -0.20                      | -0.29 | -0.50 | 0.11  | 0.04  | 0.17                  | -0.04 |   |   |   |
| HILICpos_279.1701_2.26   | HILIC | pos        | 2.26            |            |            |      | 4        |         | 0.05823                                 | 0.36315 | -0.22 | -0.02 | -0.10 | 0.03                  | -0.22 | 0.03  | 0.32156 | 0.81567 | -0.19                      | -0.19 | -0.11 | 0.24  | -0.10 | -0.35                 | 0.02  |   |   |   |
| HILICpos_279.1794_0.41   | HILIC | pos        | 0.41            |            |            |      | 4        |         | 0.70825                                 | 0.88085 | 0.14  | 0.45  | 0.46  | 0.20                  | 0.19  | 0.23  | 0.79830 | 0.96921 | -0.16                      | -0.05 | 0.27  | -0.06 | -0.24 | -0.52                 | 0.85  |   |   |   |
| RPneg_279.19632_9.218    | RP    | neg        | 9.218           |            |            |      | 4        |         | 0.39784                                 | 0.59107 | -0.24 | 0.13  | 0.38  | 0.28                  | 0.28  | 0.28  | 0.88889 | 0.99377 | -0.03                      | -0.08 | 0.09  | -0.78 | 0.24  | 0.56                  | -0.24 |   |   |   |
| RPneg_279.2317_9.16      | RP    | neg        | 9.16            |            |            |      | 4        |         | 0.00148                                 | 0.07783 | 0.26  | -0.01 | 0.44  | 0.31                  | 0.11  | 0.80  | 0.83181 | 0.95000 | -0.11                      | -0.08 | 0.08  | -0.11 | 0.05  | 0.40                  | 0.40  |   |   |   |
| RPpos_279.2318_9.69      | RP    | pos        | 9.69            |            |            |      | 4        |         | 0.01057                                 | 0.19956 | 0.65  | 0.24  | 1.09  | 0.81                  | 1.03  | 0.11  | 0.00228 | 0.09397 | 0.40                       | 0.41  | 1.09  | 0.27  | 0.26  | 0.06                  | -0.42 |   |   |   |
| HILICpos_279.2319_0.39   | HILIC | pos        | 0.39            |            |            |      | 4        |         | 0.06290                                 | 0.37073 | 0.28  | 0.08  | 0.10  | 0.27                  | 0.82  | 0.58  | 0.43729 | 0.87685 | -0.24                      | -0.39 | -0.22 | 0.24  | -0.09 | -0.17                 | -0.36 |   |   |   |
| RPpos_279.232_11.08      | RP    | pos        | 11.08           |            |            |      | 4        |         | 0.02568                                 | 0.27955 | 0.45  | 0.08  | 0.42  | 0.46                  | 0.98  | 0.57  | 0.20918 | 0.72517 | -0.36                      | -0.48 | -0.35 | -0.30 | -0.32 | -0.35                 | -0.35 |   |   |   |
| RPneg_279.23227_9.151    | RP    | neg        | 9.151           |            |            |      | 4        |         | 0.09709                                 | 0.42724 | -0.38 | -0.26 | -0.13 | -0.41                 | -0.06 | -0.06 | 0.64210 | 0.93677 | -0.17                      | -0.12 | -0.17 | -0.12 | -0.06 | -0.21                 | -0.21 |   |   |   |
| RPpos_279.2323_11.26     | RP    | pos        | 11.26           |            |            |      | 4        |         | 0.25092                                 | 0.59002 | 0.15  | 0.09  | 0.25  | 0.13                  | 0.38  | 0.28  | 0.46124 | 0.88576 | -0.23                      | 0.31  | -0.29 | -0.37 | -0.10 | -0.23                 | -0.22 |   |   |   |
| RPpos_279.2326_11.52     | RP    | pos        | 11.52           |            |            |      | 4        |         | 0.20648                                 | 0.54981 | 0.17  | 0.09  | 0.22  | 0.29                  | 0.44  | 0.25  | 0.72421 | 0.95590 | -0.12                      | -0.01 | -0.25 | -0.12 | -0.04 | -0.06                 | -0.01 |   |   |   |
| RPpos_279.2326_12.15     | RP    | pos        | 12.15           |            |            |      | 4        |         | 0.15615                                 | 0.49915 | 0.16  | 0.13  | 0.60  | 0.04                  | 0.49  | 0.17  | 0.95029 | 0.99346 | 0.02                       | -0.12 | 0.03  | -0.11 | 0.21  | 0.13                  | -0.29 |   |   |   |
| RPneg_279.23264_10.137   | RP    | neg        | 10.137          |            |            |      | 4        |         | 0.10479                                 | 0.43774 | -0.30 | -0.01 | 0.11  | 0.10                  | -0.37 | -0.29 | 0.80707 | 0.97034 | 0.00                       | 0.02  | 0.09  | 0.01  | 0.56  | -0.16                 | -0.44 |   |   |   |
| HILICneg_279.61392_7.918 | RP    | neg        | 7.918           |            |            |      | 4        |         | 0.00694                                 | 0.16434 | 0.39  | 0.46  | 0.50  | 0.46                  | 0.35  | 0.37  | 0.26458 | 0.77665 | -0.24                      | -0.37 | -0.34 | -0.19 | -0.29 | 0.34                  | -0.32 |   |   |   |
| HILICneg_279.6145_1.92   | HILIC | neg        | 1.92            |            |            |      | 4        |         | 0.01875                                 | 0.24933 | 0.47  | 0.41  | 0.63  | 0.52                  | 0.57  | 0.49  | 0.19676 | 0.71249 | -0.26                      | -0.35 | -0.30 | -0.19 | -0.12 | -0.16                 | -0.42 |   |   |   |
| RPpos_279.6467_10.25     | RP    | pos        | 10.25           |            |            |      | 4        |         | 0.04846                                 | 0.34265 | -0.50 | -0.20 | -0.11 | -0.09                 | -0.13 | -0.41 | 0.60467 | 0.92899 | 0.09                       | 0.09  | 0.05  | 0.17  | 0.06  | 0.14                  | -0.05 |   |   |   |
| RPpos_279.6468_10.12     | RP    | pos        | 10.12           |            |            |      | 4        |         | 0.03545                                 | 0.23287 | -0.43 | -0.17 | -0.14 | -0.17                 | -0.23 | -0.61 | 0.51778 | 0.90798 | 0.10                       | 0.09  | 0.12  | 0.06  | 0.19  | 0.15                  | -0.16 |   |   |   |
| HILICpos_279.6857_5.94   | HILIC | pos        | 5.94            |            |            |      | 4        |         | 0.39784                                 | 0.70746 | -0.24 | 0.13  | 0.38  | 0.28                  | 0.28  | 0.28  | 0.88889 | 0.99377 | -0.03                      | -0.08 | 0.09  | -0.78 | 0.24  | 0.56                  | -0.24 |   |   |   |
| HILICneg_279.8811_0.48   | HILIC | neg        | 0.48            |            |            |      | 4        |         | 0.87434                                 | 0.95278 | 0.03  | -0.02 | 0.11  | 0.04                  | 0.10  | 0.45  | 0.06262 | 0.48671 | -0.43                      | -0.44 | -0.48 | -0.45 | 0.41  | -0.39                 | -0.33 |   |   |   |
| HILICneg_279.9129_6.41   | HILIC | neg        | 6.41            |            |            |      | 4        |         | 0.11632                                 | 0.45208 | -0.36 | -0.10 | -0.17 | -0.30                 | -0.46 | -0.16 | 0.00992 | 0.21165 | -0.67                      | -0.80 | -0.74 | -0.18 | -0.69 | -1.08                 | -0.21 |   |   |   |
| HILICneg_279.9309_2.11   | HILIC | neg        | 2.11            |            |            |      | 4        |         | 0.34213                                 | 0.66397 | -0.13 | 0.42  | 0.25  | -0.23                 | 0.03  | 0.70  | 0.15817 | 0.66631 | -0.45                      | 0.12  | -1.14 | -0.31 | 0.04  | -0.29                 | -0.50 |   |   |   |
| RPneg_279.98932_2.635    | RP    | neg        | 2.635           |            |            |      | 4        |         | 0.02743                                 | 0.28442 | 0.35  | 0.33  | 0.61  | 0.35                  | 0.50  | 0.68  | 0.49285 | 0.89856 | -0.08                      | -0.17 | -0.11 | -0.15 | -0.12 | -0.03                 | 0.39  |   |   |   |
| HILICneg_279.9896_0.57   | HILIC | neg        | 0.57            |            |            |      | 4        |         | 0.00816                                 | 0.17819 | 0.43  | 0.57  | 0.33  | 0.78                  | 0.48  | 0.73  | 0.05932 | 0.47832 | -0.09                      | -0.32 | -0.12 | -0.01 | -0.20 | -0.08                 | 0.45  |   |   |   |
| RPpos_279.9898_3.46      | RP    | pos        | 3.46            |            |            |      | 4        |         | 0.00003                                 | 0.01005 | 0.70  | 0.43  | 0.68  | 0.96                  | 0.61  | 0.38  | 0.87543 | 0.98217 | 0.10                       | -0.44 | 0.12  | 0.08  | 0.28  | 0.46                  | -0.34 |   |   |   |
| HILICpos_280.092_6.23    | HILIC | pos        | 6.23            |            |            |      | 4        |         | 0.61031                                 | 0.83360 | -0.04 | 0.03  | 0.36  | 0.23                  | -0.02 | -0.42 | 0.23246 | 0.74941 | 0.09                       | 0.10  | 0.10  | 0.30  | 0.20  | 0.09                  | -0.27 |   |   |   |
| RPneg_280.09689_5.472    | RP    | neg        | 5.472           |            |            |      | 4        |         | 0.34556                                 | 0.66688 | 0.26  | 0.23  | 0.34  | 0.37                  | 0.45  | 0.46  | 0.07646 | 0.52148 | 0.02                       | -0.12 | -0.12 | 0.17  | 0.06  | 0.11                  | -0.06 |   |   |   |
| HILICneg_280.1243_0.66   | HILIC | neg        | 0.66            |            |            |      | 4        |         | 0.01638                                 | 0.23695 | 0.36  | 0.23  | 0.51  | 0.47                  | 0.74  | -0.02 | 0.95782 | 0.99491 | -0.10                      | -0.46 | 0.04  | -0.07 | 0.08  | -0.11                 | -0.47 |   |   |   |
| HILICpos_280.1535_1.27   | HILIC | pos        | 1.27            |            |            |      | 4        |         | 0.00306                                 | 0.11381 | 0.89  | 0.97  | 0.91  | 0.99                  | 0.87  | 0.75  | 0.19902 | 0.71482 | -0.37                      | -0.45 | -0.32 | -0.38 | -0.40 | -0.43                 | 0.35  |   |   |   |
| RPpos_280.1545_3.34      | RP    | pos        | 3.34            |            |            |      | 4        |         | 0.01401                                 | 0.22466 | 0.79  | 1.16  | 0.87  | 0.81                  | 0.73  | 0.55  | 0.12974 | 0.62317 | -0.44                      | -0.43 | -0.44 | -0.38 | -0.45 | -0.61                 | 0.36  |   |   |   |
| RPpos_280.1758_8.51      | RP    | pos        | 8.51            |            |            |      | 4        |         | 0.71632                                 | 0.88456 | 0.15  | 0.33  | -0.17 | 0.68                  | 0.20  | 0.41  | 0.42078 | 0.86863 | 0.44                       | 0.72  | 0.27  | 1.47  | -0.34 | 0.72                  | 1.72  |   |   |   |
| HILICpos_280.2109_0.42   | HILIC | pos        | 0.42            |            |            |      | 4        |         | 0.23403                                 | 0.52248 | -0.13 | 0.30  | 0.17  | -0.03                 | -0.01 | -0.06 | 0.73762 | 0.96458 | -0.15                      | 0.01  | 0.15  | 0.16  | -0.25 | -0.38                 | 0.74  |   |   |   |
| HILICneg_280.622_2.24    | HILIC | neg        | 2.24            |            |            |      | 4        |         | 8.5396                                  | 0.00479 | -1.53 | -0.02 | 1.92  | 1.74                  | 0.91  | 0.86  | 0.79350 | 0.96514 | -0.12                      | -0.11 | 0.03  | 0.10  | 0.37  | 0.41                  | -0.13 |   |   |   |
| RPpos_280.6552_10.55     | RP    | pos        | 10.55           |            |            |      | 4        |         | 0.00187                                 | 0.08706 | -0.57 | -0.13 | -0.27 | -0.50                 | -0.25 | -0.50 | 0.60582 | 0.92920 | 0.17                       | 0.18  | 0.23  | 0.15  | 0.31  | 0.08                  | 0.07  |   |   |   |
| RPneg_280.89783_10.52    | RP    | neg        | 10.52           |            |            |      | 4        |         | 0.09318                                 | 0.42257 | -0.31 | -0.06 | 0.34  | -0.07                 | -0.38 | 0.31  | 0.84091 | 0.97634 | -0.06                      | -0.12 | -0.49 | 0.12  | 0.23  | -0.59                 | 0.87  |   |   |   |
| HILICneg_280.9085_3.14   | HILIC | neg        | 3.14            |            |            |      | 4        |         | 0.08638                                 | 0.41249 | -0.45 | 0.21  | -0.27 | -0.02                 | 0.15  | -0.57 | 0.76696 | 0.96401 | -0.02                      | -0.05 | 0.02  | -0.18 | -0.21 | 0.07                  | 0.37  |   |   |   |
| RPneg_280.99332_4.676    | RP    | neg        | 4.676           |            |            |      | 4        |         | 0.18600                                 | 0.53269 | -0.19 | 0.09  | 0.08  | -0.19                 | -0.18 | -0.11 | 0.24961 | 0.76578 | -0.27                      | -0.21 | -0.21 | -0.23 | -0.27 | -0.46                 | -0.03 |   |   |   |
| RPneg_281.0097_5.386     | RP    | neg        | 5.386           |            |            |      | 4        |         | 0.28160                                 | 0.61577 | -0.30 | -0.24 | -0.21 | -0.21                 | -0.14 | -0.29 | 0.02544 | 0.33616 | 2.13                       | 1.56  | 2.15  | 1.96  | 1.70  | 1.54                  | 0.88  |   |   |   |
| RPneg_281.01044_5.577    | RP    | neg        | 5.577           |            |            |      | 4        |         | 0.11937                                 | 0.45540 | 0.93  | 0.78  | 0.87  | 1.62                  | 1.01  | 1.76  | 0.48725 | 0.89768 | 0.22                       | 0.13  | 0.20  | 0.33  | 0.25  | 0.19                  | 0.12  |   |   |   |
| HILICneg_281.0137_4.89   | HILIC | neg        | 4.89            |            |            |      | 4        |         | 0.95894                                 | 0.98548 | 0.06  | 0.52  | 0.45  | 0.04                  | 0.05  | 0.12  | 0.04115 | 0.41218 | -0.30                      | 0.00  | -0.45 | -0.01 | 0.08  | -0.62                 | -0.54 |   |   |   |
| RPneg_281.03568_1.231    | RP    | neg        | 1.231           |            |            |      | 4        |         | 0.01812                                 | 0.24551 | -0.51 | -0.22 | -0.10 | -0.61                 | -0.45 | -0.71 | 0.44281 | 0.87946 | -0.19                      | 0.14  | 0.44  | 0.41  | -0.35 | -0.79                 | -0.66 |   |   |   |
| HILICneg_281.0359_1.5    | HILIC | neg        | 1.5             |            |            |      | 4        |         | 0.00173                                 | 0.08397 | -0.77 | -0.36 | -0.51 | -0.85                 | -0.64 | -0.29 | 0.00348 | 0.11992 | -0.72                      | -0.23 | -0.25 | -0.57 | -1.32 | -1.37                 | -0.71 |   |   |   |
| HILICneg_281.0545_1.59   | HILIC | neg        | 1.59            |            |            |      | 4        |         | 0.22581                                 | 0.56747 | -0.12 | 0.16  | 0.28  | -0.05                 | 0.24  | -0.25 | 0.19757 | 0.71327 | -0.32                      | -0.36 | -0.18 | -0.31 | -0.25 | -0.21                 | -0.30 |   |   |   |
| HILICpos_281.0784_5.92   | HILIC | pos        | 5.92            |            |            |      | 4        |         | 0.96782                                 | 0.98827 | 0.00  | 0.26  | 0.60  | 0.33                  | -0.18 | -0.43 | 0.17979 | 0.69485 | 0.31                       | 0.38  | 0.35  | 0.39  | 0.38  | 0.16                  | -0.78 |   |   |   |
| HILICneg_281.0986_1.06   | HILIC | neg        | 1.06            |            |            |      | 4        |         | 0.08911                                 | 0.41718 | 0.16  | -0.11 | 0.58  | 0.28                  | 0.34  | -0.33 | 0.98861 | 0.99810 | 0.05                       | -0.17 | 0.18  | 0.09  | 0.11  | 0.00                  | -0.14 |   |   |   |
| RPneg_281.10046_3.261    | RP    | neg        | 3.261           |            |            |      | 4        |         |                                         |         |       |       |       |                       |       |       |         |         |                            |       |       |       |       |                       |       |   |   |   |



| Feature_ID             | Mode  | Ionization | Average_Rt.min. | Average_Mz | Metabolite | MSMS | ID_Level | HMDB_ID | IV-Alcohol self-administration (IV-ASA) |         |       |        |       |       |                       |       |         |         |       |       | IV-Alcohol clamp (IV-AC)   |       |       |         |       |   |                       |   |   |         |   |   |
|------------------------|-------|------------|-----------------|------------|------------|------|----------|---------|-----------------------------------------|---------|-------|--------|-------|-------|-----------------------|-------|---------|---------|-------|-------|----------------------------|-------|-------|---------|-------|---|-----------------------|---|---|---------|---|---|
|                        |       |            |                 |            |            |      |          |         | Area Under the Curve (AUC)              |         |       |        |       |       | IV-Ghrelin or Placebo |       |         |         |       |       | Area Under the Curve (AUC) |       |       |         |       |   | IV-Ghrelin or Placebo |   |   |         |   |   |
|                        |       |            |                 |            |            |      |          |         | Baseline                                |         |       | IV-ASA |       |       | Ghrelin               |       |         | Placebo |       |       | Baseline                   |       |       | Post-LD |       |   | IV-AC                 |   |   | Post-AC |   |   |
|                        |       |            |                 |            |            |      |          |         | p                                       | q       | d     | d      | d     | d     | d                     | d     | d       | d       | d     | d     | p                          | q     | d     | d       | d     | d | d                     | d | d | d       | d | d |
| RPneg_282.99112_4.676  | RP    | neg        | 4.676           |            |            |      | 4        |         | 0.14866                                 | 0.49096 | -0.21 | 0.04   | 0.09  | -0.21 | -0.19                 | -0.17 | 0.22810 | 0.74513 | -0.30 | -0.22 | -0.37                      | -0.40 | -0.32 | -0.21   | -0.06 |   |                       |   |   |         |   |   |
| RPneg_282.99374_3.523  | RP    | neg        | 3.523           | 282.9937   |            |      | 4        |         | 0.04702                                 | 0.33980 | 0.46  | 0.28   | 1.75  | 0.61  | 0.22                  | -0.28 | 0.28104 | 0.78971 | 0.39  | 0.18  | 0.38                       | 0.02  | 1.11  | 0.42    | -0.55 |   |                       |   |   |         |   |   |
| HILICpos_283.0074_3.19 | HILIC | pos        | 3.19            | 283.0074   |            |      | 4        |         | 0.03999                                 | 0.32027 | -0.27 | 0.06   | -0.10 | -0.33 | -0.19                 | -0.21 | 0.38429 | 0.84931 | -0.19 | -0.27 | -0.19                      | -0.21 | -0.18 | -0.25   | -0.02 |   |                       |   |   |         |   |   |
| RPpos_283.0079_4.69    | RP    | pos        | 4.69            | 283.0079   |            |      | 4        |         | 0.15347                                 | 0.49640 | -0.21 | 0.10   | 0.14  | -0.42 | -0.03                 | -0.34 | 0.26995 | 0.78218 | -0.28 | 0.10  | -0.27                      | -0.39 | -0.38 | -0.20   | -0.17 |   |                       |   |   |         |   |   |
| RPneg_283.02859_5.175  | RP    | neg        | 6.175           | 283.0286   |            |      | 4        |         | 0.03954                                 | 0.39977 | -0.01 | 0.02   | 0.04  | 0.01  | -0.02                 | 0.35  | 0.08715 | 0.54589 | -0.31 | -0.32 | -0.21                      | -0.38 | -0.40 | -0.25   | -0.29 |   |                       |   |   |         |   |   |
| HILICneg_283.0519_1.59 | HILIC | neg        | 1.59            | 283.0519   |            |      | 4        |         | 0.28722                                 | 0.62077 | -0.10 | 0.11   | 0.23  | 0.04  | 0.27                  | 0.25  | 0.24267 | 0.58829 | -0.29 | -0.21 | -0.21                      | -0.29 | -0.31 | -0.09   | -0.33 |   |                       |   |   |         |   |   |
| HILICneg_283.0817_3.41 | HILIC | neg        | 3.41            | 283.0817   |            |      | 4        |         | 0.03007                                 | 0.29365 | 0.46  | 0.58   | 0.62  | 0.41  | 0.50                  | 0.43  | 0.75734 | 0.96233 | -0.18 | -0.25 | -0.14                      | -0.20 | -0.18 | -0.09   | -0.04 |   |                       |   |   |         |   |   |
| RPneg_283.08221_4.346  | RP    | neg        | 4.346           | 283.0822   |            |      | 4        |         | 0.03047                                 | 0.29493 | 0.46  | 0.61   | 0.60  | 0.41  | 0.54                  | 0.43  | 0.72994 | 0.95751 | -0.19 | -0.26 | -0.16                      | -0.22 | -0.19 | -0.08   | -0.09 |   |                       |   |   |         |   |   |
| HILICpos_283.0938_5.92 | HILIC | pos        | 5.92            | 283.0938   |            |      | 4        |         | 0.96401                                 | 0.98697 | 0.01  | 0.17   | 0.37  | 0.40  | -0.18                 | -0.22 | 0.13894 | 0.63898 | 0.41  | 0.41  | 0.42                       | 0.53  | 0.25  | 0.45    | -0.61 |   |                       |   |   |         |   |   |
| RPpos_283.1075_11.73   | RP    | pos        | 11.73           | 283.1075   |            |      | 4        |         | 0.67969                                 | 0.86698 | 0.37  | 0.53   | 0.24  | 0.38  | 0.56                  | -0.20 | 0.16654 | 0.67772 | 0.73  | 1.09  | 0.82                       | 0.89  | 0.65  | 0.28    | 0.00  |   |                       |   |   |         |   |   |
| RPneg_283.1087_9.4     | RP    | neg        | 9.4             | 283.1087   |            |      | 4        |         | 0.95460                                 | 0.98355 | 0.18  | 0.42   | -0.08 | 0.30  | 0.28                  | 0.07  | 0.26905 | 0.78122 | 0.47  | 0.61  | 0.56                       | 0.49  | 0.44  | 0.12    | -0.19 |   |                       |   |   |         |   |   |
| RPneg_283.10873_11.754 | RP    | neg        | 11.754          | 283.1087   |            |      | 4        |         | 0.85499                                 | 0.94567 | 0.27  | 0.51   | 0.06  | 0.31  | 0.53                  | -0.11 | 0.20401 | 0.72005 | 0.61  | 0.78  | 0.44                       | 0.53  | 0.58  | 0.32    | -0.01 |   |                       |   |   |         |   |   |
| RPneg_283.10883_9.208  | RP    | neg        | 9.208           | 283.1088   |            |      | 4        |         | 0.79211                                 | 0.91898 | 0.14  | 0.30   | -0.04 | 0.23  | 0.34                  | 0.07  | 0.31902 | 0.81492 | 0.32  | 0.47  | 0.18                       | 0.35  | 0.50  | 0.14    | -0.26 |   |                       |   |   |         |   |   |
| RPneg_283.10931_11.612 | RP    | neg        | 11.612          | 283.1093   |            |      | 4        |         | 0.85276                                 | 0.94487 | 0.28  | 0.58   | -0.01 | 0.33  | 0.53                  | -0.39 | 0.18805 | 0.70301 | 1.35  | 2.29  | 0.57                       | 1.25  | 0.84  | 0.83    | -0.42 |   |                       |   |   |         |   |   |
| RPneg_283.11029_8.793  | RP    | neg        | 8.793           | 283.1103   |            |      | 4        |         | 0.28077                                 | 0.61492 | -0.11 | 0.00   | -0.08 | -0.16 | 0.09                  | 0.61  | 0.31670 | 0.81306 | -0.22 | -0.31 | -0.30                      | -0.04 | -0.04 | -0.21   | -0.29 |   |                       |   |   |         |   |   |
| HILICneg_283.1132_5.62 | HILIC | neg        | 5.62            | 283.1132   |            |      | 4        |         | 0.31781                                 | 0.64483 | -0.19 | -0.10  | 0.10  | -0.19 | -0.29                 | -0.11 | 0.01912 | 0.29300 | -0.10 | 0.02  | 0.00                       | 0.19  | -0.11 | -0.21   | -0.50 |   |                       |   |   |         |   |   |
| RPneg_283.11841_6.57   | RP    | neg        | 6.57            | 283.1184   |            |      | 4        |         | 0.22529                                 | 0.56723 | -0.18 | -0.15  | -0.07 | -0.06 | 0.20                  | 0.32  | 0.67093 | 0.94562 | -0.21 | -0.39 | -0.45                      | -0.07 | -0.06 | -0.34   | 0.33  |   |                       |   |   |         |   |   |
| RPpos_283.1542_8.76    | RP    | pos        | 8.76            | 283.1542   |            |      | 4        |         | 0.41856                                 | 0.72219 | -0.14 | -0.13  | -0.06 | -0.14 | 0.10                  | 0.06  | 0.20390 | 0.71951 | 0.16  | 0.15  | 0.13                       | 0.09  | 0.17  | 0.13    | 0.36  |   |                       |   |   |         |   |   |
| RPneg_283.16605_6.781  | RP    | neg        | 6.781           | 283.1661   |            |      | 4        |         | 0.16503                                 | 0.51065 | 0.43  | -0.01  | 0.44  | 0.79  | 0.13                  | -0.04 | 0.20814 | 0.72383 | 0.21  | -0.04 | 0.29                       | 0.56  | 0.64  | 0.06    | -0.01 |   |                       |   |   |         |   |   |
| HILICneg_283.1746_0.62 | HILIC | neg        | 0.62            | 283.1746   |            |      | 4        |         | 0.14650                                 | 0.48793 | 0.41  | -0.32  | 0.00  | 0.16  | -0.30                 | -0.10 | 0.48232 | 0.89580 | -0.27 | -0.11 | -0.26                      | -0.21 | -0.14 | -0.18   | -0.18 |   |                       |   |   |         |   |   |
| RPpos_283.1754_6.05    | RP    | pos        | 6.05            | 283.1754   |            |      | 4        |         | 0.73919                                 | 0.89484 | -0.09 | -0.29  | 0.34  | -0.04 | -0.05                 | 0.22  | 0.88420 | 0.98281 | 0.05  | -0.04 | 0.17                       | 0.20  | 0.01  | -0.58   | 0.01  |   |                       |   |   |         |   |   |
| RPpos_283.1754_3.55    | RP    | pos        | 3.55            | 283.1754   |            |      | 4        |         | 0.29318                                 | 0.62511 | -0.30 | -0.12  | 0.63  | -0.19 | -0.11                 | -0.03 | 0.22131 | 0.73820 | -0.48 | -0.22 | -0.17                      | -0.53 | -0.12 | -0.44   | -0.70 |   |                       |   |   |         |   |   |
| RPpos_283.1755_3.3     | RP    | pos        | 3.3             | 283.1755   |            |      | 4        |         | 0.24559                                 | 0.58617 | -0.34 | -0.27  | 0.74  | -0.49 | -0.09                 | 0.08  | 0.28024 | 0.78924 | -0.44 | -0.22 | -0.18                      | -0.54 | 0.12  | -0.56   | -0.60 |   |                       |   |   |         |   |   |
| RPneg_283.19131_8.852  | RP    | neg        | 8.852           | 283.1913   |            |      | 4        |         | 0.88336                                 | 0.95680 | -0.13 | -0.68  | -0.04 | 0.54  | 0.64                  | 0.07  | 0.99082 | 0.99855 | 0.01  | -0.56 | -0.12                      | 0.87  | -0.02 | -0.09   | 0.38  |   |                       |   |   |         |   |   |
| HILICneg_283.1916_0.44 | HILIC | neg        | 0.44            | 283.1916   |            |      | 4        |         | 0.00182                                 | 0.08578 | 0.89  | 0.16   | 0.69  | 1.07  | 1.34                  | -0.05 | 0.37031 | 0.84063 | 0.32  | 0.46  | 0.36                       | 0.67  | 0.06  | 0.71    | 0.05  |   |                       |   |   |         |   |   |
| HILICpos_283.2411_0.54 | HILIC | pos        | 0.54            | 283.2411   |            |      | 4        |         | 0.02061                                 | 0.25965 | 0.31  | 0.07   | 0.21  | 0.50  | 0.56                  | 0.35  | 0.00040 | 0.03188 | 0.13  | -0.31 | -0.04                      | 0.20  | 0.37  | 0.21    | 0.01  |   |                       |   |   |         |   |   |
| RPpos_283.2425_8.07    | RP    | pos        | 8.07            | 283.2425   |            |      | 4        |         | 0.01851                                 | 0.24801 | 0.33  | 0.15   | 0.36  | 0.42  | 0.59                  | 0.49  | 0.11051 | 0.59209 | 0.10  | -0.14 | -0.12                      | 0.09  | 0.22  | 0.36    | -0.11 |   |                       |   |   |         |   |   |
| RPneg_283.24319_10.847 | RP    | neg        | 10.847          | 283.2432   |            |      | 4        |         | 0.09124                                 | 0.42003 | 0.46  | 0.01   | 0.08  | 0.09  | 1.35                  | 0.11  | 0.43831 | 0.87693 | 0.17  | 0.02  | 0.32                       | 0.24  | 0.17  | 0.18    | -0.07 |   |                       |   |   |         |   |   |
| RPpos_283.2636_10.13   | RP    | pos        | 10.13           | 283.2636   |            |      | 4        |         | 0.75139                                 | 0.90906 | 0.05  | 0.10   | 0.09  | 0.85  | 2.32                  | 0.39  | 0.86594 | 0.98005 | 0.00  | 0.10  | 0.20                       | 0.08  | -0.38 | -0.01   | 0.10  |   |                       |   |   |         |   |   |
| HILICneg_283.2639_0.39 | HILIC | neg        | 0.39            | 283.2639   |            |      | 4        |         | 0.29334                                 | 0.62511 | -0.23 | -0.07  | 0.08  | -0.18 | 0.17                  | -0.49 | 0.95095 | 0.99346 | 0.03  | -0.13 | -0.52                      | -0.03 | 0.09  | 0.20    | 0.91  |   |                       |   |   |         |   |   |
| RPpos_283.6313_8.82    | RP    | pos        | 8.82            | 283.6313   |            |      | 4        |         | 0.15754                                 | 0.50071 | -0.26 | -0.02  | -0.09 | -0.10 | -0.24                 | -0.59 | 0.15450 | 0.66058 | 0.02  | 0.13  | 0.16                       | -0.35 | 0.24  | 0.02    | -0.07 |   |                       |   |   |         |   |   |
| RPpos_283.6596_10.3    | RP    | pos        | 10.3            | 283.6596   |            |      | 4        |         | 0.02639                                 | 0.28143 | -0.38 | 0.03   | -0.04 | -0.25 | -0.19                 | -0.36 | 0.94996 | 0.44537 | -0.08 | -0.12 | -0.05                      | -0.09 | 0.07  | -0.06   | -0.15 |   |                       |   |   |         |   |   |
| HILICneg_283.7097_1.46 | HILIC | neg        | 1.46            | 283.7097   |            |      | 4        |         | 0.14449                                 | 0.48506 | -0.34 | -0.07  | -0.41 | -0.16 | 0.44                  | -0.38 | 0.44586 | 0.89023 | 0.07  | -0.08 | -0.13                      | -0.17 | -0.13 | -0.14   | -0.14 |   |                       |   |   |         |   |   |
| HILICneg_283.9464_0.51 | HILIC | neg        | 0.51            | 283.9464   |            |      | 4        |         | 0.35760                                 | 0.67670 | 0.27  | 0.34   | 0.23  | 0.35  | 0.24                  | 0.77  | 0.04090 | 0.41186 | -0.84 | -0.81 | -0.81                      | -0.95 | -0.77 | -0.55   | -0.55 |   |                       |   |   |         |   |   |
| RPneg_283.97531_6.468  | RP    | neg        | 6.468           | 283.9753   |            |      | 4        |         | 0.95665                                 | 0.99872 | 0.09  | 0.15   | 0.25  | 0.11  | 0.31                  | 0.35  | 0.05104 | 0.45025 | -0.24 | -0.27 | -0.17                      | -0.23 | -0.26 | -0.36   | -0.03 |   |                       |   |   |         |   |   |
| RPneg_283.98483_4.487  | RP    | neg        | 4.487           | 283.9848   |            |      | 4        |         | 0.57899                                 | 0.81777 | -0.27 | -0.26  | -0.26 | -0.31 | -0.24                 | -0.12 | 0.44172 | 0.87936 | -0.31 | -0.30 | -0.30                      | -0.28 | -0.34 | -0.29   | -0.30 |   |                       |   |   |         |   |   |
| HILICneg_284.0184_4.7  | HILIC | neg        | 4.7             | 284.0184   |            |      | 4        |         | 0.72262                                 | 0.88676 | 0.10  | 0.28   | 0.96  | 0.19  | -0.18                 | -0.65 | 0.00287 | 0.10708 | 0.75  | 0.42  | 0.94                       | 1.30  | 0.69  | 0.54    | -0.36 |   |                       |   |   |         |   |   |
| RPneg_284.02496_1.404  | RP    | neg        | 1.404           | 284.0250   |            |      | 4        |         | 0.81511                                 | 0.92958 | 0.06  | 0.36   | 1.30  | 0.23  | -0.21                 | -0.69 | 0.01220 | 0.23580 | 0.64  | 0.43  | 1.24                       | 1.30  | 0.78  | 0.09    | -0.47 |   |                       |   |   |         |   |   |
| RPneg_284.02512_1.312  | RP    | neg        | 1.312           | 284.0251   |            |      | 4        |         | 0.87519                                 | 0.95325 | 0.02  | 0.18   | 0.92  | 0.26  | -0.25                 | -0.34 | 0.00043 | 0.03316 | 0.59  | 0.29  | 1.09                       | 1.30  | 0.73  | 0.23    | -0.35 |   |                       |   |   |         |   |   |
| RPneg_284.08905_2.349  | RP    | neg        | 2.349           | 284.0891   |            |      | 4        |         | 0.11950                                 | 0.45544 | -0.18 | -0.01  | 0.00  | -0.26 | 0.03                  | -0.20 | 0.41953 | 0.86739 | -0.10 | 0.01  | -0.14                      | -0.23 | 0.09  | -0.05   | -0.19 |   |                       |   |   |         |   |   |
| HILICneg_284.0892_1.42 | HILIC | neg        | 1.42            | 284.0892   |            |      | 4        |         | 0.14203                                 | 0.48177 | -0.20 | -0.08  | -0.05 | -0.25 | -0.03                 | -0.40 | 0.27009 | 0.78219 | -0.15 | -0.18 | -0.09                      | -0.08 | -0.08 | -0.22   | -0.24 |   |                       |   |   |         |   |   |
| HILICpos_284.0985_4.25 | HILIC | pos        | 4.25            | 284.0985   |            |      | 4        |         | 0.04466                                 | 0.33433 | -0.42 | -0.24  | -0.65 | -0.45 | 0.07                  | 0.12  | 0.31470 | 0.81205 | -0.33 | -0.41 | 0.10                       | -0.82 | -0.40 | -0.79   | 0.17  |   |                       |   |   |         |   |   |
| RPpos_284.116_11.73    | RP    | pos        | 11.73           | 284.1160   |            |      | 4        |         | 0.68822                                 | 0.87019 | 0.33  | 0.49   | 0.20  | 0.37  | 0.54                  | -0.26 | 0.24509 | 0.76099 | 0.64  | 0.90  | 0.66                       | 0.68  | 0.59  | 0.37    | 0.00  |   |                       |   |   |         |   |   |
| RPpos_284.128_8.59     | RP    | pos        | 8.59            | 284.1280   |            |      | 4        |         | 0.75119                                 | 0.90085 | -0.07 | 0.15   | 0.26  | 0.10  | -0.20                 |       |         |         |       |       |                            |       |       |         |       |   |                       |   |   |         |   |   |

| Feature_ID             | Mode  | Ionization | Average_Rt.min. | Average_Mz | Metabolite | MSMS | ID_Level | HMDB_ID | IV-Alcohol self-administration (IV-ASA) |         |       |                       |        |        |       |       |         |                            | IV-Alcohol clamp (IV-AC) |       |                       |        |       |       |       |  |  |  |
|------------------------|-------|------------|-----------------|------------|------------|------|----------|---------|-----------------------------------------|---------|-------|-----------------------|--------|--------|-------|-------|---------|----------------------------|--------------------------|-------|-----------------------|--------|-------|-------|-------|--|--|--|
|                        |       |            |                 |            |            |      |          |         | Area Under the Curve (AUC)              |         |       | IV-Ghrelin or Placebo |        |        |       |       |         | Area Under the Curve (AUC) |                          |       | IV-Ghrelin or Placebo |        |       |       |       |  |  |  |
|                        |       |            |                 |            |            |      |          |         | p                                       | q       | d     | Baseline              | IV-ASA | BrAC=0 | p     | q     | d       | Baseline                   | Post-LD                  | IV-AC | Post-AC               | BrAC=0 |       |       |       |  |  |  |
| HILICpos_286.1038_1.38 | HILIC | pos        | 1.38            | 286.1038   |            | 4    |          |         | 0.17795                                 | 0.52361 | -0.29 | -0.12                 | 0.00   | -0.20  | -0.27 | -0.42 | 0.65440 | 0.94016                    | -0.03                    | -0.19 | -0.07                 | 0.12   | 0.06  | -0.06 | -0.17 |  |  |  |
| RPneg_286.11511_6.799  | RP    | neg        | 6.799           | 286.1151   |            | 4    |          |         | 0.56261                                 | 0.81054 | 0.10  | 0.07                  | 0.08   | 0.09   | 0.27  | 0.21  | 0.36516 | 0.83811                    | 0.06                     | -0.03 | 0.02                  | 0.03   | 0.15  | 0.16  | -0.05 |  |  |  |
| RPpos_286.2011_5.3     | RP    | pos        | 5.3             | 286.2011   |            | 4    |          |         | 0.64463                                 | 0.84966 | 0.07  | 0.09                  | 0.20   | 0.12   | 0.29  | 0.01  | 0.09958 | 0.57123                    | 0.05                     | 0.15  | 0.08                  | 0.03   | 0.02  | 0.05  | -0.06 |  |  |  |
| HILICpos_286.2018_0.94 | HILIC | pos        | 0.94            | 286.2018   |            | 4    |          |         | 0.84195                                 | 0.94073 | 0.03  | 0.21                  | 0.14   | 0.13   | 0.23  | -0.14 | 0.13615 | 0.63435                    | 0.19                     | 0.19  | 0.27                  | 0.19   | 0.14  | 0.10  | 0.14  |  |  |  |
| RPpos_286.2018_5.55    | RP    | pos        | 5.55            | 286.2018   |            | 4    |          |         | 0.30862                                 | 0.63723 | 0.38  | 0.16                  | 0.62   | 0.34   | 0.03  | 0.04  | 0.04043 | 0.42377                    | 0.76                     | 0.74  | 0.94                  | 0.70   | 0.40  | 0.62  | 0.01  |  |  |  |
| RPneg_286.2025_5.179   | RP    | neg        | 5.179           | 286.2025   |            | 4    |          |         | 0.87438                                 | 0.95278 | 0.02  | 0.11                  | 0.21   | 0.12   | 0.23  | -0.06 | 0.49887 | 0.60009                    | 0.09                     | 0.10  | 0.17                  | 0.00   | 0.10  | -0.01 | 0.21  |  |  |  |
| HILICpos_286.213_0.79  | HILIC | pos        | 0.79            | 286.2130   |            | 4    |          |         | 0.44738                                 | 0.74252 | -0.22 | 0.13                  | 0.37   | -0.32  | -0.19 | 0.26  | 0.01518 | 0.26290                    | -0.60                    | -0.29 | -0.01                 | -0.83  | 0.09  | -0.60 | -1.11 |  |  |  |
| HILICpos_286.2284_0.39 | HILIC | pos        | 0.39            | 286.2284   |            | 4    |          |         | 0.95203                                 | 0.98240 | 0.02  | -0.30                 | 0.62   | 0.27   | 0.61  | 0.25  | 0.03650 | 0.38977                    | -1.04                    | -1.12 | -0.40                 | -0.86  | 0.07  | -0.96 | 0.20  |  |  |  |
| RPpos_286.2289_10.78   | RP    | pos        | 10.78           | 286.2289   |            | 4    |          |         | 0.66043                                 | 0.85781 | -0.05 | 0.52                  | 0.49   | 0.14   | 0.25  | 0.33  | 0.12110 | 0.60886                    | -0.45                    | -0.47 | -0.31                 | -0.51  | -0.28 | -0.63 | -0.39 |  |  |  |
| RPpos_286.2375_10.01   | RP    | pos        | 10.01           | 286.2375   |            | 4    |          |         | 0.38125                                 | 0.69515 | 0.26  | 0.52                  | 1.04   | 0.12   | 1.75  | 0.27  | 0.96999 | 0.99673                    | -0.04                    | 0.01  | 0.46                  | 0.11   | -0.03 | -0.64 | -0.14 |  |  |  |
| HILICpos_286.2737_0.46 | HILIC | pos        | 0.46            | 286.2737   |            | 4    |          |         | 0.77632                                 | 0.91190 | -0.02 | 0.28                  | 0.03   | 0.11   | 0.09  | -0.04 | 0.25480 | 0.76996                    | -0.14                    | -0.12 | -0.12                 | 0.03   | -0.14 | -0.22 | -0.27 |  |  |  |
| RPneg_286.90964_15.609 | RP    | neg        | 15.609          | 286.9096   |            | 4    |          |         | 0.72787                                 | 0.88924 | -0.08 | -0.15                 | -0.09  | 0.36   | 0.01  | -0.24 | 0.12080 | 0.60830                    | -0.56                    | -0.17 | -0.39                 | -0.12  | -0.32 | -0.58 | -0.15 |  |  |  |
| HILICneg_286.9118_5.41 | HILIC | neg        | 5.41            | 286.9118   |            | 4    |          |         | 0.19647                                 | 0.54111 | -0.53 | 0.05                  | -0.21  | 0.32   | 0.02  | -0.18 | 0.13862 | 0.63846                    | 0.25                     | 0.11  | -0.01                 | 0.78   | -0.39 | 0.41  | -0.06 |  |  |  |
| HILICneg_286.951_4.36  | HILIC | neg        | 4.36            | 286.9510   |            | 4    |          |         | 0.06267                                 | 0.37022 | -0.37 | -0.18                 | -0.19  | 0.12   | -0.15 | -0.03 | 0.33775 | 0.82457                    | -0.11                    | -0.22 | -0.14                 | 0.11   | -0.29 | -0.04 | 0.07  |  |  |  |
| HILICneg_286.9512_4.92 | HILIC | neg        | 4.92            | 286.9512   |            | 4    |          |         | 0.02894                                 | 0.28933 | -0.49 | 0.07                  | -0.37  | -0.12  | -0.06 | -0.09 | 0.70637 | 0.95248                    | 0.13                     | -0.22 | 0.15                  | 0.01   | 0.38  | 0.39  | 0.08  |  |  |  |
| HILICneg_286.9512_5.71 | HILIC | neg        | 5.71            | 286.9512   |            | 4    |          |         | 0.14427                                 | 0.48474 | -0.32 | -0.04                 | -0.54  | -0.29  | 0.33  | -0.05 | 0.80176 | 0.96981                    | -0.07                    | -0.09 | -0.03                 | 0.30   | -1.21 | -0.28 | 0.74  |  |  |  |
| HILICneg_286.974_6.41  | HILIC | neg        | 6.41            | 286.9740   |            | 4    |          |         | 0.22723                                 | 0.56902 | -0.28 | -0.18                 | -0.17  | -0.21  | -0.20 | -0.30 | 0.00705 | 0.17700                    | -0.65                    | -0.65 | -0.72                 | -0.20  | -0.66 | -0.72 | -0.26 |  |  |  |
| HILICneg_286.9775_5.41 | HILIC | neg        | 5.41            | 286.9775   |            | 4    |          |         | 0.57558                                 | 0.81613 | 0.15  | 0.25                  | 0.44   | 0.01   | 0.38  | 0.83  | 0.11025 | 0.59169                    | 0.06                     | -0.11 | 0.04                  | 0.19   | 0.20  | 0.22  | -0.64 |  |  |  |
| HILICneg_286.9801_1.42 | HILIC | neg        | 1.42            | 286.9801   |            | 4    |          |         | 0.65284                                 | 0.85399 | -0.15 | 0.00                  | 0.41   | -0.34  | -0.07 | 1.45  | 0.60864 | 0.97983                    | 0.34                     | -0.07 | 0.45                  | 0.08   | -0.08 | 0.61  | -0.25 |  |  |  |
| RPneg_287.0238_3.238   | RP    | neg        | 3.238           | 287.0233   |            | 4    |          |         | 0.31997                                 | 0.64656 | 0.63  | 1.05                  | 0.54   | 1.08   | 0.24  | 5.19  | 0.67015 | 0.94545                    | 0.09                     | 0.24  | 0.13                  | 0.09   | 0.05  | -0.10 | 1.52  |  |  |  |
| HILICneg_287.0361_0.96 | HILIC | neg        | 0.96            | 287.0361   |            | 4    |          |         | 0.97076                                 | 0.98887 | -0.05 | 0.31                  | 0.10   | -0.03  | 0.37  | 0.27  | 0.97507 | 0.99690                    | 0.02                     | -0.07 | 0.04                  | 0.18   | 0.20  | 0.06  | -0.48 |  |  |  |
| HILICneg_287.0361_4.93 | HILIC | neg        | 4.93            | 287.0361   |            | 4    |          |         | 0.42881                                 | 0.72952 | -0.19 | -0.27                 | 0.64   | 0.17   | -0.03 | -0.60 | 0.01373 | 0.24969                    | 0.46                     | 0.10  | 0.85                  | 0.62   | 0.25  | 0.59  | -0.17 |  |  |  |
| HILICneg_287.0434_4.21 | HILIC | neg        | 4.21            | 287.0434   |            | 4    |          |         | 0.05656                                 | 0.35898 | -0.29 | 0.24                  | 0.80   | -0.15  | -0.80 | -0.52 | 0.86902 | 0.98031                    | -0.12                    | -0.11 | -0.02                 | 0.14   | 0.02  | -0.27 | -0.61 |  |  |  |
| RPneg_287.04391_2.811  | RP    | neg        | 2.811           | 287.0439   |            | 4    |          |         | 0.11913                                 | 0.45534 | -0.33 | -0.03                 | 0.44   | -0.13  | -0.74 | -0.52 | 0.93029 | 0.98977                    | -0.03                    | -0.09 | 0.02                  | 0.16   | 0.24  | -0.16 | -0.44 |  |  |  |
| HILICneg_287.0515_5.77 | HILIC | neg        | 5.77            | 287.0515   |            | 4    |          |         | 0.77286                                 | 0.91047 | -0.05 | 0.20                  | 0.56   | -0.19  | -0.13 | 0.64  | 0.51163 | 0.90577                    | 0.18                     | 0.00  | 0.05                  | 1.10   | 0.38  | 0.24  | -0.33 |  |  |  |
| RPneg_287.05936_7.547  | RP    | neg        | 7.547           | 287.0594   |            | 4    |          |         | 0.49043                                 | 0.77149 | -0.10 | -0.03                 | -0.05  | -0.09  | -0.05 | -0.16 | 0.98160 | 0.99752                    | 0.01                     | -0.03 | 0.11                  | 0.11   | 0.09  | 0.04  | -0.12 |  |  |  |
| HILICpos_287.0891_5.92 | HILIC | pos        | 5.92            | 287.0891   |            | 4    |          |         | 0.67282                                 | 0.86385 | -0.07 | 0.25                  | 0.38   | 0.27   | -0.24 | -0.40 | 0.10988 | 0.59132                    | 0.41                     | 0.64  | 0.19                  | 0.65   | 0.49  | 0.10  | -0.08 |  |  |  |
| HILICneg_287.0972_6.99 | HILIC | neg        | 6.99            | 287.0972   |            | 4    |          |         | 0.78712                                 | 0.91650 | -0.11 | 0.06                  | 0.36   | 0.08   | -0.03 | -0.68 | 0.14980 | 0.65469                    | 0.19                     | 0.38  | 0.43                  | 0.57   | -0.09 | -0.10 | -0.34 |  |  |  |
| HILICpos_287.1003_1.88 | HILIC | pos        | 1.88            | 287.1003   |            | 4    |          |         | 0.00162                                 | 0.08184 | 0.63  | 0.43                  | 0.82   | 0.63   | 0.69  | 0.80  | 0.63682 | 0.93602                    | 0.23                     | 0.16  | 0.16                  | 0.10   | 0.31  | 0.35  | 0.62  |  |  |  |
| RPpos_287.1004_3.58    | RP    | pos        | 3.58            | 287.1004   |            | 4    |          |         | 0.00308                                 | 0.11386 | 0.71  | 0.52                  | 0.92   | 0.79   | 0.58  | 1.19  | 0.96720 | 0.99654                    | 0.02                     | -0.04 | -0.07                 | -0.05  | 0.27  | 0.20  | 0.05  |  |  |  |
| HILICpos_287.1091_6.64 | HILIC | pos        | 6.64            | 287.1091   |            | 4    |          |         | 0.83125                                 | 0.93624 | -0.06 | 0.09                  | 0.24   | -0.19  | 0.05  | 0.17  | 0.91290 | 0.98738                    | 0.25                     | 0.18  | 0.21                  | 0.46   | 0.47  | 0.55  | -0.17 |  |  |  |
| HILICpos_287.1092_6.75 | HILIC | pos        | 6.75            | 287.1092   |            | 4    |          |         | 0.93333                                 | 0.97624 | -0.01 | 0.27                  | 0.24   | -0.08  | 0.07  | 0.06  | 0.73042 | 0.95757                    | 0.08                     | 0.01  | -0.05                 | 0.26   | 0.45  | 0.08  | -0.15 |  |  |  |
| HILICpos_287.1464_0.52 | HILIC | pos        | 0.52            | 287.1464   |            | 4    |          |         | 0.03849                                 | 0.24801 | -0.55 | -0.42                 | 0.00   | -0.18  | -0.63 | -0.06 | 0.73347 | 0.95590                    | -0.15                    | -0.30 | -0.21                 | -0.46  | 0.24  | 0.20  | -0.15 |  |  |  |
| RPpos_287.1611_2.93    | RP    | pos        | 2.93            | 287.1611   |            | 4    |          |         | 0.44050                                 | 0.73751 | 0.01  | 0.01                  | 0.16   | 0.04   | 0.04  | 0.10  | 0.24590 | 0.76176                    | -0.11                    | -0.11 | 0.00                  | 0.15   | 0.19  | -0.09 | -0.05 |  |  |  |
| RPpos_287.1612_3.3     | RP    | pos        | 3.3             | 287.1612   |            | 4    |          |         | 0.33546                                 | 0.65844 | 0.03  | 0.00                  | 0.14   | -0.01  | 0.04  | 0.26  | 0.27969 | 0.78886                    | -0.12                    | -0.07 | -0.03                 | -0.17  | -0.13 | -0.14 | -0.09 |  |  |  |
| RPpos_287.1852_8.7     | RP    | pos        | 8.7             | 287.1852   |            | 4    |          |         | 0.42702                                 | 0.72844 | 0.34  | 1.14                  | 0.84   | 0.12   | 0.85  | 0.05  | 0.05511 | 0.46389                    | -0.62                    | -0.53 | -0.13                 | -0.31  | -0.25 | -0.71 | 0.27  |  |  |  |
| HILICneg_287.1865_0.43 | HILIC | neg        | 0.43            | 287.1865   |            | 4    |          |         | 0.12401                                 | 0.45927 | 0.24  | 0.11                  | 0.88   | 0.10   | 0.42  | -0.23 | 0.76865 | 0.96440                    | 0.02                     | -0.15 | 0.38                  | -0.03  | 0.03  | -0.21 | 0.25  |  |  |  |
| RPneg_287.18655_8.374  | RP    | neg        | 8.374           | 287.1866   |            | 4    |          |         | 0.65570                                 | 0.85565 | -0.14 | 0.30                  | 0.16   | 0.38   | 0.16  | -0.19 | 0.04802 | 0.43769                    | 0.27                     | 0.48  | 0.51                  | 0.42   | 0.27  | -0.18 | -0.16 |  |  |  |
| RPneg_287.18658_8.704  | RP    | neg        | 8.704           | 287.1866   |            | 4    |          |         | 0.63466                                 | 0.84511 | 0.04  | 0.14                  | 0.95   | 0.08   | 0.04  | -0.08 | 0.66448 | 0.94315                    | 0.01                     | -0.18 | 0.40                  | 0.01   | 0.36  | -0.38 | -0.15 |  |  |  |
| HILICpos_287.1965_3.4  | HILIC | pos        | 3.4             | 287.1965   |            | 4    |          |         | 0.71071                                 | 0.88196 | -0.10 | -0.06                 | -0.11  | -0.09  | -0.06 | -0.42 | 0.49127 | 0.89836                    | -0.07                    | -0.09 | -0.06                 | -0.08  | -0.06 | -0.10 | -0.04 |  |  |  |
| RPpos_287.2221_9.82    | RP    | pos        | 9.82            | 287.2221   |            | 4    |          |         | 0.53845                                 | 0.79801 | 0.25  | 0.62                  | -0.17  | 0.71   | 0.74  | 0.49  | 0.41672 | 0.86598                    | 0.47                     | 0.33  | 0.37                  | 1.45   | 0.01  | 0.23  | 0.42  |  |  |  |
| HILICpos_287.233_0.78  | HILIC | pos        | 0.78            | 287.2330   |            | 4    |          |         | 0.08404                                 | 0.40971 | -0.50 | -0.81                 | 0.25   | 0.15   | -0.59 | -0.84 | 0.03171 | 0.36926                    | 0.77                     | 0.49  | 0.28                  | 1.24   | 0.84  | 0.19  | -0.62 |  |  |  |
| HILICpos_287.2434_5.96 | HILIC | pos        | 5.96            | 287.2434   |            | 4    |          |         | 0.02468                                 | 0.27578 | -0.33 | -0.31                 | -0.23  | -0.27  | -0.17 | -0.31 | 0.71477 | 0.95354                    | 0.21                     | 0.17  | 0.29                  | 0.15   | 0.15  | 0.26  | 0.41  |  |  |  |
| RPpos_287.2585_11.69   | RP    | pos        | 11.69           | 287.2585   |            | 4    |          |         | 0.66992                                 | 0.86237 | -0.09 | 1.13                  | -0.15  | 0.30   | -0.12 | -0.05 | 0.21877 | 0.73525                    | -0.24                    | -0.26 | 0.01                  | 0.30   | -0.18 | 0.14  | -0.36 |  |  |  |
| RPneg_287.61118_6.273  | RP    | neg        | 6.273           | 287.6112   |            | 4    |          |         | 0.43915                                 | 0.73636 | -0.15 | -0.29                 | 0.11   | -0.88  | 0.29  | -0.22 | 0.88564 | 0.98281                    | -0.07                    | -0.10 | -0.29                 | 0.11   | -0.08 | 0.21  | -0.27 |  |  |  |
| RPpos_287.6335_10.12   | RP    | pos        | 10.12           | 287.6335   |            | 4    |          |         | 0.08449                                 | 0.32547 | -0.40 | -0.18                 | -0.12  | -0.03  | -0.12 | -0.79 | 0.36464 | 0.83786                    | 0.14                     | 0.11  | 0.23                  | -0.02  | 0.18  | 0.20  | -0.06 |  |  |  |
| RPpos_287.6367_9.87    | RP    | pos        | 9.87            | 287.6367   |            | 4    |          |         | 0.17536                                 | 0.52072 | -0.30 | -0.07                 | 0.02   | -0.18  | -0.15 | -0.19 | 0.19360 | 0.70855                    | -0.35                    | -0.83 | -0.19                 | -0.49  | 0.24  | -0.49 | -0.35 |  |  |  |
| HILICneg_287.7055_1.46 | HILIC | neg        | 1.46            | 287.7055   |            | 4    |          |         | 0.13955                                 | 0.47916 | -0.32 | -0.12                 | -0.25  | -0.07  | 0.23  | 0.10  | 0.84364 | 0.97663                    | 0.06                     | -0.24 | 0.29                  | -0.09  | 0.16  | 0.11  | 0.13  |  |  |  |
| RPneg_287.83478_11.195 | RP    | neg        | 11.195          | 287.8348   |            | 4    |          |         | 0.00544                                 | 0.14526 | 0.87  | 0.30                  | 0.96   | 0.91   | 1.11  | 0.38  | 0.94572 | 0.99233                    | -0.02                    | -0.22 | 0.21                  | 0.03   | 0.54  | 0.31  | -0.26 |  |  |  |
| RPneg_287.83478        |       |            |                 |            |            |      |          |         |                                         |         |       |                       |        |        |       |       |         |                            |                          |       |                       |        |       |       |       |  |  |  |



| Feature_ID               | Mode  | Ionization | Average_Rt.min. | Average_Mz | Metabolite | MSMS    | ID_Level | HMDB_ID | IV-Alcohol self-administration (IV-ASA) |         |       |        |       |       |                       |       |         |         |       |       | IV-Alcohol clamp (IV-AC)   |       |       |       |       |   |                       |   |   |         |   |   |
|--------------------------|-------|------------|-----------------|------------|------------|---------|----------|---------|-----------------------------------------|---------|-------|--------|-------|-------|-----------------------|-------|---------|---------|-------|-------|----------------------------|-------|-------|-------|-------|---|-----------------------|---|---|---------|---|---|
|                          |       |            |                 |            |            |         |          |         | Area Under the Curve (AUC)              |         |       |        |       |       | IV-Ghrelin or Placebo |       |         |         |       |       | Area Under the Curve (AUC) |       |       |       |       |   | IV-Ghrelin or Placebo |   |   |         |   |   |
|                          |       |            |                 |            |            |         |          |         | Baseline                                |         |       | IV-ASA |       |       | Ghrelin               |       |         | Placebo |       |       | Baseline                   |       |       | IV-AC |       |   | Ghrelin               |   |   | Placebo |   |   |
|                          |       |            |                 |            |            |         |          |         | p                                       | q       | d     | d      | d     | d     | d                     | d     | d       | d       | d     | d     | p                          | q     | d     | d     | d     | d | d                     | d | d | d       | d | d |
| HILICneg_292.9261_4.12   | HILIC | neg        | 4.12            | 292.9261   |            |         | 4        |         | 0.66277                                 | 0.85876 | 0.08  | 0.27   | 0.65  | 0.10  | 0.01                  | -0.66 | 0.04760 | 0.43562 | 0.39  | 0.37  | 0.55                       | 0.84  | 0.27  | 0.28  | -0.06 |   |                       |   |   |         |   |   |
| HILICneg_293.0118_1.94   | HILIC | neg        | 1.94            | 293.0118   |            |         | 4        |         | 0.75167                                 | 0.90110 | 0.11  | 0.05   | 0.52  | 0.22  | 0.25                  | -0.39 | 0.35823 | 0.83442 | 0.53  | 0.58  | 0.53                       | 0.60  | 0.93  | 0.25  | 0.12  |   |                       |   |   |         |   |   |
| RPneg_293.01187_5.022    | RP    | neg        | 5.022           | 293.0118   |            |         | 4        |         | 0.38535                                 | 0.69778 | -0.11 | -0.08  | -0.08 | -0.10 | -0.06                 | -0.28 | 0.36158 | 0.83579 | 0.69  | 0.50  | 0.46                       | 0.52  | 1.21  | 0.60  | 1.35  |   |                       |   |   |         |   |   |
| RPneg_293.01282_6.099    | RP    | neg        | 6.099           | 293.0128   |            |         | 4        |         | 0.69809                                 | 0.87637 | 0.06  | 0.12   | 0.11  | 0.17  | 0.16                  | -0.25 | 0.28656 | 0.79555 | 4.55  | 4.11  | 4.54                       | 4.93  | 2.54  | 2.21  | 0.41  |   |                       |   |   |         |   |   |
| HILICneg_293.0486_5.85   | HILIC | neg        | 5.85            | 293.0486   |            |         | 4        |         | 0.36120                                 | 0.67947 | 0.27  | 0.05   | 0.89  | 0.39  | 0.41                  | 0.20  | 0.94646 | 0.43475 | 0.72  | 0.05  | 0.52                       | 0.50  | 0.68  | 0.70  | 0.74  |   |                       |   |   |         |   |   |
| HILICneg_293.0487_6.28   | HILIC | neg        | 6.28            | 293.0487   |            |         | 4        |         | 0.23947                                 | 0.58127 | 0.29  | 0.21   | 0.81  | 0.75  | 0.58                  | -0.45 | 0.38895 | 0.72474 | 0.44  | 0.05  | 0.26                       | 0.32  | 0.31  | 0.12  | 0.00  |   |                       |   |   |         |   |   |
| HILICneg_293.0488_4.21   | HILIC | neg        | 4.21            | 293.0488   |            |         | 4        |         | 0.06458                                 | 0.37454 | -0.34 | -0.26  | 0.18  | -0.40 | -0.47                 | 0.12  | 0.73014 | 0.95751 | -0.12 | 0.16  | 0.47                       | -0.41 | 0.29  | -0.13 | -0.45 |   |                       |   |   |         |   |   |
| RPneg_293.04883_8.712    | RP    | neg        | 8.712           | 293.0488   |            |         | 4        |         | 0.85012                                 | 0.94370 | -0.02 | 0.11   | -0.03 | -0.06 | 0.16                  | 0.14  | 0.01113 | 0.22372 | 0.57  | 0.34  | 0.85                       | 0.37  | 0.72  | 0.18  | 1.09  |   |                       |   |   |         |   |   |
| HILICneg_293.049_4.37    | HILIC | neg        | 4.37            | 293.0490   |            |         | 4        |         | 0.40107                                 | 0.70919 | -0.22 | -0.31  | -0.17 | -0.36 | -0.47                 | 0.69  | 0.57311 | 0.92240 | -0.16 | 0.12  | 0.35                       | -0.54 | 0.66  | -0.13 | -0.39 |   |                       |   |   |         |   |   |
| HILICneg_293.0491_5.96   | HILIC | neg        | 5.96            | 293.0491   |            |         | 4        |         | 0.49740                                 | 0.77461 | 0.05  | 0.20   | 0.44  | 0.21  | 0.13                  | -0.75 | 0.34351 | 0.82774 | 0.24  | 0.13  | 0.25                       | 0.33  | 0.42  | 0.15  | -0.07 |   |                       |   |   |         |   |   |
| HILICneg_293.0499_5.69   | HILIC | neg        | 5.69            | 293.0499   |            |         | 4        |         | 0.43569                                 | 0.73382 | 0.32  | -0.39  | 0.76  | 0.62  | 0.64                  | 0.68  | 0.00871 | 0.19927 | 0.40  | 0.08  | 0.84                       | 0.72  | 0.65  | 0.16  | 0.23  |   |                       |   |   |         |   |   |
| HILICneg_293.0548_0.77   | HILIC | neg        | 0.77            | 293.0548   |            |         | 4        |         | 0.00163                                 | 0.08213 | -0.39 | -0.02  | 0.17  | -0.49 | -0.29                 | -0.48 | 0.46137 | 0.88584 | -0.13 | 0.20  | 0.11                       | -0.03 | -0.19 | -0.38 | -0.31 |   |                       |   |   |         |   |   |
| HILICneg_293.0551_1.19   | HILIC | neg        | 1.19            | 293.0551   |            |         | 4        |         | 0.98019                                 | 0.99237 | -0.04 | 0.21   | 0.53  | 0.12  | 0.21                  | 0.49  | 0.06471 | 0.49288 | 0.32  | 0.30  | 0.48                       | 0.37  | 0.34  | 0.42  | 0.40  |   |                       |   |   |         |   |   |
| HILICneg_293.063_6.99    | HILIC | neg        | 6.99            | 293.0630   |            |         | 4        |         | 0.35317                                 | 0.67279 | -0.24 | 0.02   | 0.22  | -0.04 | 0.01                  | -0.15 | 0.13188 | 0.62692 | 0.17  | 0.27  | 0.34                       | 0.42  | -0.20 | 0.21  | -0.10 |   |                       |   |   |         |   |   |
| RPneg_293.11395_3.561    | RP    | neg        | 3.561           | 293.1140   |            |         | 4        |         | 0.62699                                 | 0.84211 | 0.19  | 0.26   | 0.80  | 0.39  | 0.26                  | -0.69 | 0.01544 | 0.26569 | 0.45  | 0.13  | 0.41                       | 0.51  | 0.77  | 0.48  | -0.03 |   |                       |   |   |         |   |   |
| RPpos_293.1261_9.25      | RP    | pos        | 9.25            | 293.1261   |            |         | 4        |         | 0.51026                                 | 0.78266 | 0.28  | -0.03  | 0.67  | 0.85  | 1.88                  | 0.12  | 0.19945 | 0.71508 | 0.18  | -0.18 | 0.58                       | 0.12  | 0.43  | -0.04 | 0.18  |   |                       |   |   |         |   |   |
| RPneg_293.13925_8.06     | RP    | neg        | 8.06            | 293.1393   |            |         | 4        |         | 0.82493                                 | 0.93365 | 0.07  | 0.18   | 0.15  | 0.24  | 0.39                  | 0.48  | 0.20758 | 0.72383 | -0.22 | -0.23 | -0.28                      | -0.14 | -0.15 | -0.16 | -0.28 |   |                       |   |   |         |   |   |
| HILICpos_293.1457_6.13   | HILIC | pos        | 6.13            | 293.1457   |            |         | 4        |         | 0.92150                                 | 0.97165 | -0.02 | 0.24   | 0.50  | 0.23  | 0.05                  | -0.22 | 0.02617 | 0.34137 | 0.35  | 0.40  | 0.42                       | 0.44  | 0.49  | 0.31  | -0.09 |   |                       |   |   |         |   |   |
| HILICneg_293.1754_6.22   | HILIC | neg        | 6.22            | 293.1754   |            |         | 4        |         | 0.10066                                 | 0.43282 | -0.48 | -0.17  | -0.14 | -0.30 | 0.12                  | -0.46 | 0.05750 | 0.47239 | 0.68  | 0.76  | 0.49                       | 0.17  | 0.42  | 0.32  | 0.58  |   |                       |   |   |         |   |   |
| HILICneg_293.1758_0.88   | HILIC | neg        | 0.88            | 293.1758   |            |         | 4        |         | 0.76716                                 | 0.90862 | 0.08  | 1.09   | 0.66  | 0.38  | 0.34                  | -0.01 | 0.11262 | 0.59597 | 0.13  | 0.33  | 0.66                       | 0.07  | 0.16  | 0.05  | -0.08 |   |                       |   |   |         |   |   |
| HILICneg_293.1759_0.96   | HILIC | neg        | 0.96            | 293.1759   |            |         | 4        |         | 0.81043                                 | 0.92734 | -0.07 | 0.28   | 0.15  | 0.16  | 0.25                  | -0.19 | 0.65334 | 0.94010 | -0.02 | 0.01  | 0.07                       | 0.21  | 0.03  | -0.17 | -0.41 |   |                       |   |   |         |   |   |
| HILICneg_293.1759_4.1    | HILIC | neg        | 4.1             | 293.1759   |            |         | 4        |         | 0.34579                                 | 0.66700 | 0.36  | 0.22   | 0.85  | 0.66  | -0.01                 | -0.28 | 0.86521 | 0.98005 | 0.03  | 0.09  | 0.13                       | 0.77  | -0.39 | -0.02 | -0.44 |   |                       |   |   |         |   |   |
| HILICneg_293.1761_5.69   | HILIC | neg        | 5.69            | 293.1761   |            |         | 4        |         | 0.72260                                 | 0.88676 | 0.08  | -0.28  | 0.56  | 0.81  | -0.08                 | 0.20  | 0.13625 | 0.63435 | 0.25  | 0.30  | 0.27                       | 0.11  | 0.52  | 0.02  | -0.29 |   |                       |   |   |         |   |   |
| RPneg_293.1767_8.237     | RP    | neg        | 8.237           | 293.1767   |            |         | 4        |         | 0.21965                                 | 0.56168 | -0.29 | 0.03   | 0.21  | 0.38  | 0.24                  | 0.63  | 0.33615 | 0.82364 | -0.23 | 0.06  | -0.35                      | 0.41  | -0.55 | -0.38 | 0.19  |   |                       |   |   |         |   |   |
| HILICpos_293.1769_0.46   | HILIC | pos        | 0.46            | 293.1769   |            |         | 4        |         | 0.30304                                 | 0.63234 | -0.25 | -0.40  | 0.44  | -0.08 | -0.12                 | 0.15  | 0.54139 | 0.91464 | -0.29 | -0.16 | -0.02                      | -0.09 | -0.08 | -1.00 | -0.47 |   |                       |   |   |         |   |   |
| RPpos_293.1786_6.3       | RP    | pos        | 6.3             | 293.1786   |            |         | 4        |         | 0.52322                                 | 0.78939 | -0.16 | -0.31  | 0.69  | -0.09 | -0.04                 | 0.27  | 0.46038 | 0.88511 | -0.30 | -0.13 | -0.08                      | -0.23 | -0.13 | -0.84 | -0.38 |   |                       |   |   |         |   |   |
| RPpos_293.1789_10.81     | RP    | pos        | 10.81           | 293.1789   |            |         | 4        |         | 0.22440                                 | 0.56687 | -0.40 | -0.67  | 0.44  | -0.21 | 0.19                  | -0.09 | 0.34043 | 0.82617 | -0.28 | -0.06 | -0.12                      | 0.20  | -0.32 | -0.64 | -0.47 |   |                       |   |   |         |   |   |
| RPpos_293.1907_2.97      | RP    | pos        | 2.97            | 293.1907   |            |         | 4        |         | 0.38895                                 | 0.70085 | 0.08  | 0.00   | 0.43  | -0.14 | 0.36                  | -0.35 | 0.21903 | 0.73554 | 0.43  | -0.13 | 1.14                       | -0.63 | -0.20 | 1.39  | 0.42  |   |                       |   |   |         |   |   |
| HILICpos_293.1947_0.41   | HILIC | pos        | 0.41            | 293.1947   |            |         | 4        |         | 0.82720                                 | 0.93463 | 0.07  | 0.31   | 0.32  | 0.05  | 0.44                  | 0.08  | 0.54778 | 0.91689 | -0.32 | -0.12 | 0.30                       | -0.38 | -0.04 | -0.49 | 0.16  |   |                       |   |   |         |   |   |
| RPpos_293.2093_9.87      | RP    | pos        | 9.87            | 293.2093   |            |         | 4        |         | 0.94525                                 | 0.97998 | -0.05 | 0.51   | 0.32  | 0.30  | 0.48                  | 0.63  | 0.00580 | 0.16053 | 0.40  | 0.20  | 0.59                       | 0.25  | 1.18  | 0.19  | -0.70 |   |                       |   |   |         |   |   |
| RPneg_293.21213_9.671    | RP    | neg        | 9.671           | 293.2121   |            |         | 4        |         | 0.50837                                 | 0.78135 | 0.18  | -0.26  | 0.29  | 1.34  | 0.30                  | -0.55 | 0.24559 | 0.76171 | 0.21  | 0.07  | 0.61                       | 0.16  | 0.13  | 0.02  | 0.07  |   |                       |   |   |         |   |   |
| RPneg_293.21216_9.417    | RP    | neg        | 9.417           | 293.2122   |            | no MSMS | 4        |         | 6.20670                                 | 0.00077 | 1.03  | 0.54   | 1.37  | 1.91  | 1.48                  | 0.05  | 0.00012 | 0.01377 | 0.53  | 0.54  | 0.93                       | 0.67  | 0.12  | 0.29  | -0.04 |   |                       |   |   |         |   |   |
| RPneg_293.21234_10.051   | RP    | neg        | 10.051          | 293.2123   |            |         | 4        |         | 0.17674                                 | 0.61158 | -0.38 | 0.13   | -0.17 | 0.33  | 0.12                  | -0.28 | 0.89798 | 0.95518 | -0.12 | 0.07  | 0.16                       | -0.61 | 0.42  | -0.08 | 0.25  |   |                       |   |   |         |   |   |
| HILICpos_293.2182_7.08   | HILIC | pos        | 7.08            | 293.2182   |            |         | 4        |         | 0.80439                                 | 0.92471 | 0.01  | 0.50   | 0.60  | -0.08 | -0.18                 | -0.52 | 0.00247 | 0.09833 | 0.70  | 0.60  | 0.83                       | 1.35  | 0.50  | 0.14  | -0.26 |   |                       |   |   |         |   |   |
| RPpos_293.285_11.17      | RP    | pos        | 11.17           | 293.2850   |            |         | 4        |         | 0.77262                                 | 0.91041 | 0.10  | 0.17   | 0.06  | 0.09  | 0.91                  | -0.84 | 0.09529 | 0.56392 | 0.71  | 2.36  | -0.06                      | 0.67  | -0.06 | 0.44  | 0.30  |   |                       |   |   |         |   |   |
| RPpos_293.6632_10.69     | RP    | pos        | 10.69           | 293.6632   |            |         | 4        |         | 0.02366                                 | 0.27152 | -0.41 | -0.18  | -0.21 | -0.22 | -0.17                 | -0.35 | 0.59205 | 0.92666 | -0.01 | 0.10  | 0.11                       | -0.06 | 0.02  | 0.10  | -0.34 |   |                       |   |   |         |   |   |
| RPpos_293.6744_5.21      | RP    | pos        | 5.21            | 293.6744   |            |         | 4        |         | 0.86834                                 | 0.95065 | -0.10 | 0.33   | 0.52  | 0.06  | -0.34                 | 0.26  | 0.36844 | 0.83983 | -0.13 | -0.40 | -0.21                      | -0.06 | 0.21  | 0.13  | -0.22 |   |                       |   |   |         |   |   |
| RPneg_293.78281_10.524   | RP    | neg        | 10.524          | 293.7828   |            |         | 4        |         | 0.30678                                 | 0.63538 | 0.18  | 0.16   | 0.17  | 0.42  | 0.14                  | 0.42  | 0.03923 | 0.40372 | 0.22  | 0.09  | 0.07                       | 0.02  | 0.21  | 0.48  | 0.35  |   |                       |   |   |         |   |   |
| HILICneg_293.84103_7.652 | HILIC | neg        | 7.652           | 293.8410   |            |         | 4        |         | 0.45658                                 | 0.74842 | -0.09 | -0.03  | -0.03 | -0.09 | 0.07                  | -0.14 | 0.52092 | 0.90888 | -0.04 | -0.11 | -0.02                      | -0.15 | 0.03  | 0.05  | -0.11 |   |                       |   |   |         |   |   |
| HILICneg_293.8412_0.44   | HILIC | neg        | 0.44            | 293.8412   |            |         | 4        |         | 0.96983                                 | 0.98857 | -0.04 | 0.09   | -0.05 | -0.04 | 0.13                  | -0.15 | 0.17077 | 0.68293 | -0.17 | -0.04 | -0.25                      | -0.22 | -0.19 | -0.03 | -0.17 |   |                       |   |   |         |   |   |
| RPneg_293.93884_2.111    | RP    | neg        | 2.111           | 293.9388   |            |         | 4        |         | 0.80411                                 | 0.92459 | 0.07  | 0.35   | 1.07  | 0.24  | -0.18                 | -0.55 | 0.02238 | 0.31646 | 0.85  | 0.61  | 1.20                       | 1.01  | 1.38  | 0.76  | -0.33 |   |                       |   |   |         |   |   |
| RPneg_294.00476_4.275    | RP    | neg        | 4.275           | 294.0048   |            |         | 4        |         | 0.87904                                 | 0.95487 | 0.00  | -0.05  | -0.01 | 0.16  | 0.05                  | 0.26  | 0.17549 | 0.69019 | -0.27 | -0.19 | -0.24                      | -0.26 | -0.27 | -0.30 | -0.27 |   |                       |   |   |         |   |   |
| RPneg_294.02982_2.112    | RP    | neg        | 2.112           | 294.0298   |            |         | 4        |         | 0.56072                                 | 0.80943 | -0.16 | 0.16   | 1.04  | 0.12  | -0.28                 | -0.86 | 0.00050 | 0.03695 | 1.25  | 1.07  | 3.03                       | 2.76  | 1.71  | 0.88  | -0.07 |   |                       |   |   |         |   |   |
| HILICneg_294.0471_6.41   | HILIC | neg        | 6.41            | 294.0471   |            |         | 4        |         | 0.04658                                 | 0.33877 | -0.37 | 0.17   | -0.02 |       |                       |       |         |         |       |       |                            |       |       |       |       |   |                       |   |   |         |   |   |





| Feature_ID             | Mode  | Ionization | Average_Rt.min. | Average_Mz | Metabolite | MSMS | ID_Level | HMDB_ID | IV-Alcohol self-administration (IV-ASA) |       |        |       |        |       |                       |         |                       |       |          |       |                            |       | IV-Alcohol clamp (IV-AC) |       |         |   |                       |   |   |   |   |  |  |  |  |  |
|------------------------|-------|------------|-----------------|------------|------------|------|----------|---------|-----------------------------------------|-------|--------|-------|--------|-------|-----------------------|---------|-----------------------|-------|----------|-------|----------------------------|-------|--------------------------|-------|---------|---|-----------------------|---|---|---|---|--|--|--|--|--|
|                        |       |            |                 |            |            |      |          |         | Area Under the Curve (AUC)              |       |        |       |        |       | IV-Ghrelin or Placebo |         |                       |       |          |       | Area Under the Curve (AUC) |       |                          |       |         |   | IV-Ghrelin or Placebo |   |   |   |   |  |  |  |  |  |
|                        |       |            |                 |            |            |      |          |         | Baseline                                |       | IV-ASA |       | BrAC=0 |       | Baseline              |         | IV-Ghrelin or Placebo |       | Baseline |       | Post-LD                    |       | IV-AC                    |       | Post-AC |   | BrAC=0                |   |   |   |   |  |  |  |  |  |
|                        |       |            |                 |            |            |      |          |         | p                                       | q     | d      | d     | d      | d     | d                     | d       | d                     | d     | p        | q     | d                          | d     | d                        | d     | d       | d | d                     | d | d | d | d |  |  |  |  |  |
| HILICneg_299.0174_1.4  | HILIC | neg        | 1.4             | 299.0174   |            | 4    |          | 0.16148 | 0.50533                                 | -0.30 | -0.10  | 0.01  | 0.24   | 0.06  | 0.38                  | 0.04902 | 0.44202               | 0.36  | 0.29     | 0.14  | 0.30                       | 0.26  | 0.48                     | 0.68  |         |   |                       |   |   |   |   |  |  |  |  |  |
| HILICneg_299.0175_4.06 | HILIC | neg        | 4.06            | 299.0175   |            | 4    |          | 0.15647 | 0.49946                                 | 0.29  | 0.31   | 0.62  | 0.68   | -0.11 | 0.15                  | 0.05138 | 0.45163               | 1.37  | 0.26     | 0.02  | 0.08                       | 3.05  | 1.91                     | 1.05  |         |   |                       |   |   |   |   |  |  |  |  |  |
| HILICneg_299.0175_5.43 | HILIC | neg        | 5.43            | 299.0175   |            | 4    |          | 0.00708 | 0.16629                                 | -0.50 | -0.04  | -0.65 | 0.07   | -0.33 | -0.98                 | 0.96205 | 0.99564               | 0.12  | 0.18     | 0.32  | 0.60                       | -0.52 | -0.28                    | 1.45  |         |   |                       |   |   |   |   |  |  |  |  |  |
| HILICneg_299.0176_0.96 | HILIC | neg        | 0.96            | 299.0176   |            | 4    |          | 0.93944 | 0.97971                                 | 0.01  | 0.07   | 0.08  | 0.17   | 0.44  | -0.83                 | 0.81897 | 0.97238               | 0.02  | 0.09     | 0.01  | 0.10                       | 0.01  | 0.01                     | 0.04  |         |   |                       |   |   |   |   |  |  |  |  |  |
| HILICneg_299.0177_1.24 | HILIC | neg        | 1.24            | 299.0177   |            | 4    |          | 0.28933 | 0.62258                                 | -0.33 | -0.19  | -0.24 | 0.25   | -0.05 | 0.31                  | 0.98733 | 0.99245               | -0.08 | 0.21     | -0.03 | 0.37                       | -0.16 | -0.10                    | -0.36 |         |   |                       |   |   |   |   |  |  |  |  |  |
| HILICneg_299.0177_5.52 | HILIC | neg        | 5.52            | 299.0177   |            | 4    |          | 0.64879 | 0.85145                                 | -0.17 | 0.05   | 0.29  | -0.27  | 0.02  | -0.35                 | 0.59671 | 0.92798               | -0.03 | 0.35     | -0.40 | 0.36                       | -0.15 | -0.35                    | 0.01  |         |   |                       |   |   |   |   |  |  |  |  |  |
| HILICneg_299.0177_5.69 | HILIC | neg        | 5.69            | 299.0177   |            | 4    |          | 0.81643 | 0.93016                                 | -0.08 | 0.11   | 0.28  | 0.37   | -0.10 | -0.34                 | 0.11341 | 0.59668               | 0.26  | 0.36     | 0.09  | 0.55                       | -0.18 | 0.75                     | -0.44 |         |   |                       |   |   |   |   |  |  |  |  |  |
| HILICneg_299.0177_1.09 | HILIC | neg        | 1.09            | 299.0177   |            | 4    |          | 0.64942 | 0.85174                                 | -0.16 | 0.09   | 0.28  | -0.15  | 0.51  | -0.87                 | 0.21291 | 0.72984               | -0.56 | 0.15     | 0.26  | 0.73                       | -0.42 | -0.68                    | -0.03 |         |   |                       |   |   |   |   |  |  |  |  |  |
| HILICneg_299.0179_3.21 | HILIC | neg        | 3.21            | 299.0179   |            | 4    |          | 0.14048 | 0.48049                                 | -0.45 | 0.45   | -0.12 | 0.32   | 0.43  | -0.35                 | 0.25640 | 0.77187               | -0.18 | -0.07    | -0.32 | -0.42                      | -0.82 | -0.19                    | 0.42  |         |   |                       |   |   |   |   |  |  |  |  |  |
| HILICneg_299.0179_0.39 | HILIC | neg        | 0.39            | 299.0179   |            | 4    |          | 0.59451 | 0.82625                                 | -0.11 | -0.20  | 0.18  | 0.69   | 1.03  | -0.44                 | 0.81563 | 0.97200               | -0.05 | -0.42    | -0.09 | -0.13                      | -0.01 | 0.22                     | 0.25  |         |   |                       |   |   |   |   |  |  |  |  |  |
| RPneg_299.07092_2.812  | RP    | neg        | 2.812           | 299.0709   |            | 4    |          | 0.13781 | 0.47749                                 | -0.32 | 0.06   | 0.47  | -0.16  | -0.70 | -0.43                 | 0.89970 | 0.98550               | -0.09 | 0.08     | 0.03  | 0.04                       | 0.21  | -0.32                    | -0.49 |         |   |                       |   |   |   |   |  |  |  |  |  |
| HILICpos_299.0884_5.64 | HILIC | pos        | 5.64            | 299.0884   |            | 4    |          | 0.50978 | 0.78230                                 | 0.15  | 0.26   | 0.83  | 0.76   | 0.26  | -0.04                 | 0.04049 | 0.13315               | 0.44  | 0.40     | 0.37  | 0.64                       | 0.36  | 0.53                     | -0.30 |         |   |                       |   |   |   |   |  |  |  |  |  |
| HILICpos_299.0888_5.8  | HILIC | pos        | 5.8             | 299.0888   |            | 4    |          | 0.94435 | 0.97950                                 | 0.09  | 0.71   | 0.75  | 0.26   | 0.15  | -0.96                 | 0.04015 | 0.40814               | 1.09  | 0.79     | 1.02  | 1.03                       | 0.60  | 1.11                     | 0.11  |         |   |                       |   |   |   |   |  |  |  |  |  |
| HILICpos_299.0888_5.92 | HILIC | pos        | 5.92            | 299.0888   |            | 4    |          | 0.71713 | 0.88469                                 | -0.06 | 0.30   | 0.45  | 0.19   | -0.20 | -0.24                 | 0.00701 | 0.17677               | 0.61  | 0.69     | 0.78  | 0.53                       | 0.65  | 0.55                     | -0.29 |         |   |                       |   |   |   |   |  |  |  |  |  |
| HILICpos_299.0893_6.18 | HILIC | pos        | 6.18            | 299.0893   |            | 4    |          | 0.80953 | 0.92703                                 | -0.05 | 0.54   | 0.61  | 0.11   | 0.14  | -0.37                 | 0.10697 | 0.58506               | 0.91  | 1.02     | 0.21  | 1.01                       | 0.32  | -0.16                    | 0.85  |         |   |                       |   |   |   |   |  |  |  |  |  |
| RPneg_299.09543_10.046 | RP    | neg        | 10.046          | 299.0954   |            | 4    |          | 0.56069 | 0.80943                                 | 0.22  | -0.05  | 0.21  | 0.79   | 1.74  | 0.10                  | 0.23986 | 0.75656               | 0.26  | 0.44     | 0.63  | 0.03                       | 0.63  | -0.42                    | 0.46  |         |   |                       |   |   |   |   |  |  |  |  |  |
| RPneg_299.10437_6.18   | RP    | neg        | 6.18            | 299.1044   |            | 4    |          | 0.24719 | 0.58734                                 | 0.53  | 0.66   | 0.87  | 0.40   | 0.79  | -0.11                 | 0.11120 | 0.59315               | 0.94  | 0.87     | 1.03  | 1.12                       | 0.99  | 0.53                     | 0.07  |         |   |                       |   |   |   |   |  |  |  |  |  |
| HILICpos_299.1382_0.39 | HILIC | pos        | 0.39            | 299.1382   |            | 4    |          | 0.76740 | 0.90661                                 | 0.09  | 0.23   | -0.11 | 0.11   | 0.49  | 0.12                  | 0.35542 | 0.83337               | 0.11  | 0.37     | 0.12  | 0.20                       | -0.10 | 0.13                     | -0.17 |         |   |                       |   |   |   |   |  |  |  |  |  |
| RPpos_299.139_6.83     | RP    | pos        | 6.83            | 299.1390   |            | 4    |          | 0.25161 | 0.53955                                 | 0.80  | 1.60   | 0.53  | 0.58   | 0.96  | 2.44                  | 0.57654 | 0.92304               | -0.09 | -0.01    | -0.02 | -0.09                      | -0.15 | -0.15                    | -0.07 |         |   |                       |   |   |   |   |  |  |  |  |  |
| RPpos_299.1392_5.69    | RP    | pos        | 5.69            | 299.1392   |            | 4    |          | 0.26821 | 0.60409                                 | 0.94  | 2.00   | 0.44  | 0.93   | 0.72  | 3.01                  | 0.43940 | 0.87800               | -0.13 | 0.02     | 0.08  | 0.08                       | 0.22  | -0.14                    | -0.18 |         |   |                       |   |   |   |   |  |  |  |  |  |
| RPpos_299.1394_11.73   | RP    | pos        | 11.73           | 299.1394   |            | 4    |          | 0.58014 | 0.81830                                 | 0.38  | 0.56   | 0.26  | 0.41   | 0.57  | -0.25                 | 0.18759 | 0.70238               | 0.66  | 0.98     | 0.79  | 0.73                       | 0.55  | 0.31                     | 0.02  |         |   |                       |   |   |   |   |  |  |  |  |  |
| RPneg_299.1496_8.937   | RP    | neg        | 8.937           | 299.1496   |            | 4    |          | 0.55807 | 0.80851                                 | -0.16 | 0.37   | 0.26  | 0.02   | 0.21  | -0.16                 | 0.93080 | 0.98982               | -0.01 | -0.17    | 0.21  | 0.14                       | 0.24  | -0.45                    | 0.74  |         |   |                       |   |   |   |   |  |  |  |  |  |
| RPneg_299.14963_8.395  | RP    | neg        | 8.395           | 299.1496   |            | 4    |          | 0.36011 | 0.67864                                 | -0.25 | 0.24   | 0.26  | 0.02   | 0.05  | 0.00                  | 0.93402 | 0.98984               | 0.03  | -0.13    | 0.30  | 0.05                       | 0.36  | -0.34                    | 0.41  |         |   |                       |   |   |   |   |  |  |  |  |  |
| HILICpos_299.1598_2.46 | HILIC | pos        | 2.46            | 299.1598   |            | 4    |          | 0.98347 | 0.99360                                 | -0.07 | -0.06  | 0.35  | 0.10   | 0.05  | 0.46                  | 0.46538 | 0.88771               | -0.12 | -0.20    | -0.04 | -0.19                      | 0.30  | -0.34                    | -0.25 |         |   |                       |   |   |   |   |  |  |  |  |  |
| RPpos_299.1836_8.14    | RP    | pos        | 8.14            | 299.1836   |            | 4    |          | 0.12723 | 0.46383                                 | -0.53 | 0.16   | 0.01  | 0.19   | -0.02 | -0.06                 | 0.77906 | 0.96555               | -0.02 | 0.01     | 0.10  | -0.04                      | -0.19 | 0.20                     | -0.04 |         |   |                       |   |   |   |   |  |  |  |  |  |
| RPpos_299.1856_10.16   | RP    | pos        | 10.16           | 299.1856   |            | 4    |          | 0.57774 | 0.81697                                 | 0.20  | 0.55   | 0.59  | 0.07   | 0.46  | 0.04                  | 0.27548 | 0.78603               | -0.54 | -0.35    | 0.08  | -0.47                      | -0.19 | -0.78                    | 0.01  |         |   |                       |   |   |   |   |  |  |  |  |  |
| RPpos_299.1898_10.62   | RP    | pos        | 10.62           | 299.1898   |            | 4    |          | 0.41155 | 0.71645                                 | 0.30  | -0.22  | 0.66  | 0.74   | 1.50  | 0.20                  | 0.68200 | 0.94823               | 0.04  | -0.35    | 0.00  | 0.14                       | 0.35  | 0.12                     | 0.03  |         |   |                       |   |   |   |   |  |  |  |  |  |
| RPpos_299.2006_9.91    | RP    | pos        | 9.91            | 299.2006   |            | 4    |          | 0.57678 | 0.81658                                 | -0.24 | 0.29   | 0.22  | 0.45   | 0.61  | 0.18                  | 0.91739 | 0.98820               | -0.04 | 0.60     | -0.17 | 0.06                       | 0.11  | -0.06                    | -0.59 |         |   |                       |   |   |   |   |  |  |  |  |  |
| RPneg_299.20218_9.5    | RP    | neg        | 9.5             | 299.2022   |            | 4    |          | 0.01968 | 0.25518                                 | -0.79 | -0.56  | -0.94 | -0.49  | -0.39 | -0.25                 | 0.69771 | 0.95114               | -0.02 | -0.70    | 0.03  | -0.05                      | 0.07  | 0.29                     | 0.08  |         |   |                       |   |   |   |   |  |  |  |  |  |
| RPpos_299.2218_9.37    | RP    | pos        | 9.37            | 299.2218   |            | 4    |          | 0.09657 | 0.42632                                 | -0.31 | 0.26   | 0.25  | -0.10  | 0.45  | -0.86                 | 0.33640 | 0.82394               | -0.31 | -0.65    | 0.07  | -0.80                      | 0.64  | -0.46                    | -0.11 |         |   |                       |   |   |   |   |  |  |  |  |  |
| RPneg_299.2253_9.221   | RP    | neg        | 9.221           | 299.2253   |            | 4    |          | 0.87284 | 0.95254                                 | -0.15 | -0.15  | -0.13 | -0.08  | -0.04 | -0.12                 | 0.39612 | 0.85507               | -0.01 | 0.13     | -0.15 | 0.06                       | 0.11  | -0.07                    | 0.05  |         |   |                       |   |   |   |   |  |  |  |  |  |
| HILICpos_299.2325_2.11 | HILIC | pos        | 2.11            | 299.2325   |            | 4    |          | 0.05454 | 0.35571                                 | -0.40 | -0.33  | 0.05  | 0.31   | -0.33 | -0.23                 | 0.15138 | 0.65695               | 0.56  | 0.09     | 0.42  | 0.65                       | 0.59  | 0.29                     | 0.27  |         |   |                       |   |   |   |   |  |  |  |  |  |
| RPpos_299.237_7.46     | RP    | pos        | 7.46            | 299.2370   |            | 4    |          | 0.02340 | 0.27047                                 | 0.53  | 0.30   | 0.54  | 0.81   | 0.64  | 0.66                  | 0.00950 | 0.27054               | 0.28  | -0.09    | -0.25 | 0.52                       | 0.38  | 0.72                     | 0.00  |         |   |                       |   |   |   |   |  |  |  |  |  |
| RPpos_299.2581_11.52   | RP    | pos        | 11.52           | 299.2581   |            | 4    |          | 0.63547 | 0.84562                                 | 0.07  | -0.10  | 0.24  | 0.11   | 0.45  | -0.01                 | 0.28275 | 0.79142               | 0.34  | 0.36     | 0.21  | 0.06                       | 0.73  | 0.15                     | 0.08  |         |   |                       |   |   |   |   |  |  |  |  |  |
| RPpos_299.2585_10.21   | RP    | pos        | 10.21           | 299.2585   |            | 4    |          | 0.89448 | 0.96179                                 | -0.03 | 0.30   | 0.02  | 0.54   | 0.80  | 0.25                  | 0.58354 | 0.92465               | -0.08 | -0.31    | -0.01 | -0.07                      | -0.16 | -0.12                    | 0.17  |         |   |                       |   |   |   |   |  |  |  |  |  |
| RPpos_299.2585_10.08   | RP    | pos        | 10.08           | 299.2585   |            | 4    |          | 0.93657 | 0.97709                                 | -0.07 | 0.06   | -0.10 | 0.70   | 0.66  | 0.16                  | 0.39201 | 0.85247               | -0.09 | -0.16    | -0.09 | -0.07                      | -0.10 | -0.12                    | 0.06  |         |   |                       |   |   |   |   |  |  |  |  |  |
| RPneg_299.25879_10.892 | RP    | neg        | 10.892          | 299.2588   |            | 4    |          | 0.84015 | 0.93974                                 | 0.05  | 0.09   | 0.15  | 0.28   | 0.74  | 0.09                  | 0.33059 | 0.82076               | 0.74  | 0.87     | 0.41  | 0.59                       | 1.37  | 1.15                     | 0.95  |         |   |                       |   |   |   |   |  |  |  |  |  |
| HILICneg_299.259_0.44  | HILIC | neg        | 0.44            | 299.2590   |            | 4    |          | 0.20522 | 0.54928                                 | -0.27 | -0.03  | -0.03 | -0.28  | 0.30  | -0.27                 | 0.92778 | 0.98945               | 0.04  | -0.23    | -0.14 | 0.14                       | 0.15  | 0.05                     | 0.36  |         |   |                       |   |   |   |   |  |  |  |  |  |
| RPneg_299.25937_10.263 | RP    | neg        | 10.263          | 299.2594   |            | 4    |          | 0.20779 | 0.55103                                 | 0.48  | 0.10   | 0.39  | 0.87   | 1.47  | 0.89                  | 0.65581 | 0.94036               | 0.07  | -0.11    | 0.48  | -0.06                      | 0.17  | 0.04                     | -0.19 |         |   |                       |   |   |   |   |  |  |  |  |  |
| RPneg_299.25937_10.143 | RP    | neg        | 10.143          | 299.2594   |            | 4    |          | 0.48855 | 0.99399                                 | 0.00  | 0.08   | 0.22  | 1.08   | 1.68  | 0.15                  | 0.42586 | 0.87093               | 0.13  | 0.15     | 0.23  | 0.22                       | 0.32  | 0.34                     | 0.03  |         |   |                       |   |   |   |   |  |  |  |  |  |
| RPpos_299.6256_9.95    | RP    | pos        | 9.95            | 299.6256   |            | 4    |          | 0.21374 | 0.55622                                 | -0.22 | -0.07  | -0.01 | -0.14  | -0.05 | -0.30                 | 0.75465 | 0.96233               | -0.05 | 0.00     | 0.03  | 0.05                       | 0.04  | -0.04                    | -0.21 |         |   |                       |   |   |   |   |  |  |  |  |  |
| HILICneg_299.7716_1.45 | HILIC | neg        | 1.45            | 299.7716   |            | 4    |          | 0.01954 | 0.25437                                 | -0.24 | 0.00   | -0.18 | 0.04   | -0.12 | 0.45                  | 0.87973 | 0.98264               | 0.08  | -0.03    | 0.01  | 0.19                       | 0.07  | -0.01                    | 0.35  |         |   |                       |   |   |   |   |  |  |  |  |  |
| HILICneg_299.7854_0.56 | HILIC | neg        | 0.56            | 299.7854   |            | 4    |          | 0.48675 | 0.76878                                 | -0.17 | 0.11   | 0.04  | 0.22   | -0.08 | -0.32                 | 0.22424 | 0.74094               | 0.26  | 0.00     | 0.51  | 0.07                       | 0.47  | 0.24                     | -0.07 |         |   |                       |   |   |   |   |  |  |  |  |  |
| HILICneg_299.8659_3.88 | HILIC | neg        | 3.88            | 299.8659   |            | 4    |          | 0.24431 | 0.58521                                 | -0.41 | 0.31   | -0.25 | -0.26  | -0.01 | -0.41                 | 0.28807 | 0.79407               | -0.31 | 0.60     | -0.12 | -0.78                      | 0.22  | -0.23                    | -0.55 |         |   |                       |   |   |   |   |  |  |  |  |  |
| HILICneg_299.866_0.56  | HILIC | neg        | 0.56            | 299.8660   |            | 4    |          | 0.38805 | 0.70019                                 | -0.27 | 0.05   | -0.32 | 0.22   | -0.05 | 0.26                  | 0.64711 | 0.93869               | 0.07  | 0.23     | -0.03 | 0.02                       | -0.02 | 0.10                     | 0.31  |         |   |                       |   |   |   |   |  |  |  |  |  |
| HILICneg_299.8664_4.88 | HILIC | neg        | 4.88            | 299.8664   |            | 4    |          | 0.49302 | 0.77302                                 | -0.06 | 0.43   | 0.40  | -0.22  | 0.05  | 0.53                  | 0.06125 | 0.48317               | -0.45 | 0.01     | -0.86 | -0.17                      | -0.14 | -0.88                    | -0.53 |         |   |                       |   |   |   |   |  |  |  |  |  |
| HILICneg_299.8666_1.02 | HILIC | neg        | 1.02            | 299.8666   |            | 4    |          | 0.26977 | 0.60945                                 | -0.26 | 0.07   | -0.31 | 0.41   | -0.31 | 0.21                  | 0.33316 | 0.82231               | -0.21 | -0.16    | -0.17 | 0.51                       | -0.03 | 0.06                     | 0.01  |         |   |                       |   |   |   |   |  |  |  |  |  |
| HILICneg_299.9187_0.39 | HILIC | neg        | 0.39            | 299.9187   |            | 4    |          | 0.02566 | 0.27944                                 | 0.66  | -0.08  | 0.28  | 0.59   | 2.14  | 0.33                  | 0.92052 | 0.98863               | -0.05 | -0.70    | -0.03 | -0.19                      | 0.11  | 0.14                     | 0.30  |         |   |                       |   |   |   |   |  |  |  |  |  |
| RPneg_299.91931_14.277 | RP    | neg        | 14.277          | 299.9193   |            | 4    |          | 0.03246 | 0.30133                                 | -0.44 | 0.03   | 0.43  | -0.50  | -0.33 | 0.39                  | 0.15459 | 0.66077               | -0.36 | -0.54    | -0.23 | 0.10                       | -0.04 | -0.44                    | -0.44 |         |   |                       |   |   |   |   |  |  |  |  |  |
| RPneg_299.97275_1.3    |       |            |                 |            |            |      |          |         |                                         |       |        |       |        |       |                       |         |                       |       |          |       |                            |       |                          |       |         |   |                       |   |   |   |   |  |  |  |  |  |

| Feature_ID             | Mode  | Ionization | Average_Rt.min. | Average_Mz | Metabolite | MSMS | ID_Level | HMDB_ID | IV-Alcohol self-administration (IV-ASA) |         |       |        |       |       |                       |       |         |          |       |       |                            | IV-Alcohol clamp (IV-AC) |       |                       |       |      |                       |   |   |        |   |   |                       |   |   |
|------------------------|-------|------------|-----------------|------------|------------|------|----------|---------|-----------------------------------------|---------|-------|--------|-------|-------|-----------------------|-------|---------|----------|-------|-------|----------------------------|--------------------------|-------|-----------------------|-------|------|-----------------------|---|---|--------|---|---|-----------------------|---|---|
|                        |       |            |                 |            |            |      |          |         | Area Under the Curve (AUC)              |         |       |        |       |       | IV-Ghrelin or Placebo |       |         |          |       |       | Area Under the Curve (AUC) |                          |       |                       |       |      | IV-Ghrelin or Placebo |   |   |        |   |   |                       |   |   |
|                        |       |            |                 |            |            |      |          |         | Baseline                                |         |       | IV-ASA |       |       | IV-Ghrelin or Placebo |       |         | Baseline |       |       | IV-ASA                     |                          |       | IV-Ghrelin or Placebo |       |      | Baseline              |   |   | IV-ASA |   |   | IV-Ghrelin or Placebo |   |   |
|                        |       |            |                 |            |            |      |          |         | p                                       | q       | d     | p      | q     | d     | p                     | q     | d       | p        | q     | d     | p                          | q                        | d     | p                     | q     | d    | p                     | q | d | p      | q | d | p                     | q | d |
| HILICneg_301.7691_1.46 | HILIC | neg        | 1.46            | 301.7691   |            |      | 4        |         | 0.00033                                 | 0.0385  | -0.52 | -0.25  | -0.41 | -0.16 | -0.24                 | 0.49  | 0.67902 | 0.94718  | 0.02  | 0.04  | -0.31                      | 0.15                     | 0.00  | 0.00                  | 0.00  | 0.45 |                       |   |   |        |   |   |                       |   |   |
| HILICpos_301.96_5.92   | HILIC | pos        | 5.92            | 301.9600   |            |      | 4        |         | 0.76754                                 | 0.90863 | -0.02 | 0.09   | 0.53  | 0.19  | -0.33                 | -0.33 | 0.49623 | 0.90020  | 0.19  | 0.08  | 0.14                       | 0.23                     | 0.11  | 0.45                  | -0.32 |      |                       |   |   |        |   |   |                       |   |   |
| RPneg_301.96994_2.112  | RP    | neg        | 2.112           | 301.9699   |            |      | 4        |         | 0.40861                                 | 0.71440 | -0.23 | 0.03   | 1.03  | -0.01 | -0.47                 | -0.84 | 0.00067 | 0.04426  | 1.97  | 1.43  | 3.65                       | 4.84                     | 2.17  | 1.01                  | -0.34 |      |                       |   |   |        |   |   |                       |   |   |
| RPneg_301.96997_1.306  | RP    | neg        | 1.306           | 301.9700   |            |      | 4        |         | 0.21064                                 | 0.55369 | -0.38 | 0.11   | 0.58  | -0.02 | -0.87                 | -0.73 | 0.04060 | 0.40966  | 1.08  | -0.13 | 1.63                       | 1.42                     | 0.46  | 1.01                  | -0.55 |      |                       |   |   |        |   |   |                       |   |   |
| HILICneg_302.0465_1.5  | HILIC | neg        | 1.5             | 302.0465   |            |      | 4        |         | 0.84532                                 | 0.94710 | -0.10 | 0.06   | 0.18  | -0.05 | 0.08                  | 0.36  | 0.64947 | 0.97348  | -0.05 | 0.19  | 0.27                       | 0.07                     | 0.16  | -0.21                 | -0.03 |      |                       |   |   |        |   |   |                       |   |   |
| HILICneg_302.0565_1.38 | HILIC | neg        | 1.38            | 302.0565   |            |      | 4        |         | 0.78928                                 | 0.91762 | -0.11 | 0.01   | 0.05  | -0.06 | 0.17                  | 0.25  | 0.06681 | 0.49923  | -0.22 | -0.26 | -0.13                      | 0.45                     | -0.31 | -0.59                 |       |      |                       |   |   |        |   |   |                       |   |   |
| RPneg_302.06644_1.593  | RP    | neg        | 1.593           | 302.0664   |            |      | 4        |         | 0.52490                                 | 0.79036 | -0.09 | 0.04   | 0.14  | -0.09 | -0.16                 | -0.44 | 0.05669 | 0.46911  | -0.36 | -0.28 | -0.19                      | -0.52                    | -0.35 | -0.31                 | -0.55 |      |                       |   |   |        |   |   |                       |   |   |
| HILICneg_302.0743_0.91 | HILIC | neg        | 0.91            | 302.0743   |            |      | 4        |         | 0.64835                                 | 0.85135 | -0.10 | -0.13  | -0.01 | -0.13 | 0.06                  | 0.87  | 0.85826 | 0.97927  | -0.09 | -0.15 | -0.16                      | -0.18                    | -0.13 | -0.01                 | 0.19  |      |                       |   |   |        |   |   |                       |   |   |
| HILICneg_302.1007_6.26 | HILIC | neg        | 6.26            | 302.1007   |            |      | 4        |         | 0.04350                                 | 0.33163 | -0.29 | -0.06  | 0.21  | -0.26 | 0.00                  | -0.25 | 0.64907 | 0.93915  | -0.07 | -0.26 | -0.10                      | 0.13                     | 0.16  | -0.02                 | -0.28 |      |                       |   |   |        |   |   |                       |   |   |
| RPneg_302.11401_3.828  | RP    | neg        | 3.828           | 302.1140   |            |      | 4        |         | 0.86493                                 | 0.94954 | 0.06  | -0.04  | 0.16  | 0.02  | -0.01                 | 0.88  | 0.13877 | 0.63846  | 0.06  | 0.04  | -0.06                      | 0.12                     | 0.17  | 0.15                  | 0.08  |      |                       |   |   |        |   |   |                       |   |   |
| RPpos_302.1159_5.94    | RP    | pos        | 5.94            | 302.1159   |            |      | 4        |         | 0.47497                                 | 0.76084 | 0.17  | -0.04  | -0.05 | 0.60  | 0.59                  | -0.23 | 0.43546 | 0.87634  | 0.27  | 0.19  | 0.52                       | -0.06                    | 0.44  | 0.05                  | 0.11  |      |                       |   |   |        |   |   |                       |   |   |
| HILICpos_302.138_0.41  | HILIC | pos        | 0.41            | 302.1380   |            |      | 4        |         | 0.19639                                 | 0.54109 | -0.34 | -0.22  | -0.19 | -0.30 | -0.18                 | -0.32 | 0.00001 | 0.00292  | 1.40  | 1.55  | 1.31                       | 1.34                     | 1.45  | 1.38                  | 0.49  |      |                       |   |   |        |   |   |                       |   |   |
| RPneg_302.17621_8.8    | RP    | neg        | 8.8             | 302.1762   |            |      | 4        |         | 0.79823                                 | 0.92212 | 0.04  | 0.15   | 0.15  | 0.11  | 0.13                  | -0.34 | 0.63462 | 0.93546  | 0.06  | 0.05  | 0.06                       | 0.06                     | 0.12  | 0.09                  | -0.10 |      |                       |   |   |        |   |   |                       |   |   |
| HILICpos_302.1955_3.04 | HILIC | pos        | 3.04            | 302.1955   |            |      | 4        |         | 0.07105                                 | 0.38622 | -0.48 | 0.00   | -0.38 | -0.09 | 0.08                  | 0.30  | 0.97793 | 0.99726  | -0.11 | 0.09  | 0.03                       | -0.01                    | 0.14  | -0.41                 | 0.39  |      |                       |   |   |        |   |   |                       |   |   |
| HILICpos_302.1961_3.69 | HILIC | pos        | 3.69            | 302.1961   |            |      | 4        |         | 0.97116                                 | 0.98911 | -0.02 | -0.06  | 0.04  | -0.01 | 0.58                  | 0.41  | 0.11258 | 0.59534  | -0.44 | -0.13 | -0.52                      | -0.16                    | -0.58 | 0.19                  | -0.54 |      |                       |   |   |        |   |   |                       |   |   |
| HILICpos_302.1963_1.51 | HILIC | pos        | 1.51            | 302.1963   |            |      | 4        |         | 0.23848                                 | 0.58007 | 0.31  | 0.22   | 0.13  | 0.59  | 0.52                  | 0.38  | 0.31492 | 0.81220  | 0.07  | -0.06 | 0.39                       | -0.45                    | -0.01 | 0.11                  | 0.18  |      |                       |   |   |        |   |   |                       |   |   |
| RPpos_302.2151_8.27    | RP    | pos        | 8.27            | 302.2151   |            |      | 4        |         | 0.72882                                 | 0.89600 | 0.10  | 0.27   | 0.31  | 0.14  | 0.31                  | -0.02 | 0.04504 | 0.42535  | 1.00  | 0.94  | 0.92                       | 0.73                     | 1.10  | 0.97                  | 0.67  |      |                       |   |   |        |   |   |                       |   |   |
| RPneg_302.2157_8.526   | RP    | neg        | 8.526           | 302.2157   |            |      | 4        |         | 0.92337                                 | 0.97251 | 0.04  | 0.29   | 0.20  | 0.06  | 0.14                  | 0.01  | 0.03999 | 0.40730  | 0.91  | 1.14  | 0.85                       | 0.56                     | 1.06  | 0.94                  | 1.05  |      |                       |   |   |        |   |   |                       |   |   |
| HILICpos_302.2322_0.76 | HILIC | pos        | 0.76            | 302.2322   |            |      | 4        |         | 0.71080                                 | 0.88198 | 0.19  | 0.28   | 0.56  | 0.25  | 0.24                  | -0.29 | 0.89587 | 0.98490  | 0.01  | 0.07  | 0.15                       | -0.01                    | 0.08  | -0.01                 | -0.43 |      |                       |   |   |        |   |   |                       |   |   |
| RPpos_302.2322_6.37    | RP    | pos        | 6.37            | 302.2322   |            |      | 4        |         | 0.81145                                 | 0.92782 | 0.03  | 0.17   | 0.34  | 0.07  | 0.08                  | 0.13  | 0.66797 | 0.94452  | -0.08 | -0.14 | 0.02                       | 0.08                     | 0.03  | -0.03                 | -0.34 |      |                       |   |   |        |   |   |                       |   |   |
| RPpos_302.2329_6.69    | RP    | pos        | 6.69            | 302.2329   |            |      | 4        |         | 0.57824                                 | 0.81725 | 0.27  | 0.30   | 0.73  | 0.60  | 0.21                  | -0.29 | 0.00338 | 0.11757  | 0.66  | 1.01  | 0.70                       | 0.49                     | 0.66  | 0.33                  | -0.28 |      |                       |   |   |        |   |   |                       |   |   |
| RPpos_302.233_9.48     | RP    | pos        | 9.48            | 302.2330   |            |      | 4        |         | 0.53624                                 | 0.79668 | 0.22  | 0.28   | 1.20  | -0.16 | 0.77                  | 0.42  | 0.07478 | 0.51835  | -0.71 | -0.29 | -0.35                      | 0.00                     | -0.95 | -1.59                 | 0.08  |      |                       |   |   |        |   |   |                       |   |   |
| HILICpos_302.2685_0.54 | HILIC | pos        | 0.54            | 302.2685   |            |      | 4        |         | 0.26864                                 | 0.60477 | 0.12  | 0.53   | 0.10  | 0.71  | 0.35                  | -0.26 | 0.25828 | 0.77327  | 0.24  | 0.05  | 0.46                       | 0.96                     | 0.38  | 0.44                  | -0.34 |      |                       |   |   |        |   |   |                       |   |   |
| RPneg_302.66077_8.065  | RP    | neg        | 8.065           | 302.6608   |            |      | 4        |         | 0.25478                                 | 0.59315 | 0.11  | 0.17   | 0.16  | 0.07  | 0.27                  | 0.02  | 0.17204 | 0.68499  | -0.10 | -0.09 | -0.17                      | 0.03                     | -0.11 | -0.11                 | -0.19 |      |                       |   |   |        |   |   |                       |   |   |
| RPneg_302.94943_2.433  | RP    | neg        | 2.433           | 302.9494   |            |      | 4        |         | 0.57440                                 | 0.81596 | -0.16 | -0.11  | -0.09 | -0.25 | -0.07                 | 0.21  | 0.11090 | 0.59240  | 0.32  | 0.34  | 0.33                       | 0.33                     | 0.30  | 0.23                  | 0.45  |      |                       |   |   |        |   |   |                       |   |   |
| HILICneg_302.9965_4.87 | HILIC | neg        | 4.87            | 302.9965   |            |      | 4        |         | 0.26459                                 | 0.60141 | -0.33 | -0.49  | -0.36 | -0.04 | 0.26                  | -0.50 | 0.25302 | 0.76898  | 0.27  | 0.05  | 0.62                       | 0.46                     | -0.16 | -0.07                 | 0.55  |      |                       |   |   |        |   |   |                       |   |   |
| RPneg_303.00671_5.186  | RP    | neg        | 5.186           | 303.0067   |            |      | 4        |         | 0.54451                                 | 0.80051 | 0.19  | 0.17   | 0.44  | 0.55  | 0.18                  | 0.25  | 0.67721 | 0.94718  | 0.10  | -0.06 | 0.08                       | 0.15                     | 0.27  | 0.26                  | -0.09 |      |                       |   |   |        |   |   |                       |   |   |
| RPneg_303.01822_3.269  | RP    | neg        | 3.269           | 303.0182   |            |      | 4        |         | 0.55841                                 | 0.80857 | 0.08  | 0.17   | 0.43  | 0.18  | -0.13                 | -0.47 | 0.09222 | 0.55862  | 0.24  | 0.25  | 0.26                       | 0.37                     | 0.23  | 0.11                  | -0.06 |      |                       |   |   |        |   |   |                       |   |   |
| RPpos_303.0391_4.74    | RP    | pos        | 4.74            | 303.0391   |            |      | 4        |         | 0.19695                                 | 0.54166 | 0.15  | 0.04   | 0.26  | 0.00  | 0.40                  | 0.50  | 0.68336 | 0.94838  | -0.10 | -0.10 | -0.02                      | -0.07                    | -0.06 | -0.14                 | -0.25 |      |                       |   |   |        |   |   |                       |   |   |
| HILICneg_303.0503_2.57 | HILIC | neg        | 2.57            | 303.0503   |            |      | 4        |         | 0.02625                                 | 0.28103 | -0.46 | -0.22  | -0.28 | -0.32 | -0.51                 | 0.34  | 0.52715 | 0.91004  | -0.40 | -0.15 | 0.23                       | -0.68                    | -0.68 | -0.60                 | 0.30  |      |                       |   |   |        |   |   |                       |   |   |
| RPneg_303.05072_1.68   | RP    | neg        | 1.68            | 303.0507   |            |      | 4        |         | 0.03435                                 | 0.30469 | -0.44 | -0.16  | -0.24 | -0.38 | -0.55                 | 0.41  | 0.70024 | 0.95161  | -0.31 | 0.04  | 0.22                       | -0.60                    | -0.56 | -0.52                 | 0.36  |      |                       |   |   |        |   |   |                       |   |   |
| HILICneg_303.067_4.21  | HILIC | neg        | 4.21            | 303.0670   |            |      | 4        |         | 0.51424                                 | 0.78467 | -0.17 | 0.39   | 0.56  | 0.00  | -0.47                 | -0.58 | 0.18350 | 0.69966  | 0.23  | 1.11  | 0.18                       | -0.01                    | 0.18  | -0.56                 | 0.43  |      |                       |   |   |        |   |   |                       |   |   |
| RPneg_303.07205_2.204  | RP    | neg        | 2.204           | 303.0721   |            |      | 4        |         | 0.04590                                 | 0.33705 | 0.59  | 0.14   | 0.97  | 0.79  | 0.59                  | 0.20  | 0.00272 | 0.10447  | 0.29  | -0.28 | 0.06                       | 0.52                     | 0.75  | 0.63                  | 0.04  |      |                       |   |   |        |   |   |                       |   |   |
| RPneg_303.07205_2.634  | RP    | neg        | 2.634           | 303.0721   |            |      | 4        |         | 0.03249                                 | 0.30133 | 0.56  | 0.13   | 1.11  | 0.85  | 0.65                  | 0.28  | 0.00001 | 0.00268  | 0.23  | -0.15 | 0.08                       | 0.48                     | 0.57  | 0.49                  | -0.05 |      |                       |   |   |        |   |   |                       |   |   |
| HILICneg_303.0729_4.92 | HILIC | neg        | 4.92            | 303.0729   |            |      | 4        |         | 0.00396                                 | 0.12877 | 0.54  | 0.21   | 1.24  | 0.54  | 0.55                  | 0.22  | 0.05682 | 0.46932  | 0.15  | -0.27 | 0.05                       | 0.46                     | 0.53  | 0.47                  | -0.17 |      |                       |   |   |        |   |   |                       |   |   |
| HILICpos_303.0738_1.88 | HILIC | pos        | 1.88            | 303.0738   |            |      | 4        |         | 0.00022                                 | 0.02854 | 0.67  | 0.38   | 1.00  | 0.69  | 0.71                  | 0.68  | 0.59541 | 0.92772  | 0.28  | 0.20  | 0.25                       | 0.12                     | 0.45  | 0.39                  | 0.55  |      |                       |   |   |        |   |   |                       |   |   |
| RPpos_303.0739_3.58    | RP    | pos        | 3.58            | 303.0739   |            |      | 4        |         | 0.00261                                 | 0.10507 | 0.49  | 0.62   | 0.88  | 0.43  | 0.36                  | 0.84  | 0.41908 | 0.86713  | 0.25  | -0.03 | -0.02                      | 0.17                     | 0.13  | 0.85                  | 0.59  |      |                       |   |   |        |   |   |                       |   |   |
| RPneg_303.08276_1.882  | RP    | neg        | 1.882           | 303.0828   |            |      | 4        |         | 0.97649                                 | 0.99092 | -0.05 | 0.13   | 0.59  | 0.08  | 0.23                  | 0.51  | 0.09427 | 0.56203  | 0.23  | 0.34  | 0.43                       | 0.09                     | 0.36  | 0.12                  | 0.27  |      |                       |   |   |        |   |   |                       |   |   |
| HILICneg_303.0833_1.19 | HILIC | neg        | 1.19            | 303.0833   |            |      | 4        |         | 0.45903                                 | 0.75035 | -0.21 | 0.11   | 0.30  | -0.06 | 0.15                  | 0.47  | 0.39615 | 0.85510  | 0.23  | 0.21  | 0.45                       | 0.06                     | 0.25  | 0.31                  | 0.03  |      |                       |   |   |        |   |   |                       |   |   |
| RPpos_303.0868_5.63    | RP    | pos        | 5.63            | 303.0868   |            |      | 4        |         | 0.01687                                 | 0.23960 | 0.22  | -0.14  | 0.36  | 0.39  | 0.34                  | -0.27 | 0.53946 | 0.91464  | 0.23  | 0.01  | -0.03                      | 0.12                     | 0.39  | 0.52                  | 0.34  |      |                       |   |   |        |   |   |                       |   |   |
| RPpos_303.0868_5.79    | RP    | pos        | 5.79            | 303.0868   |            |      | 4        |         | 0.01038                                 | 0.19826 | 0.38  | -0.03  | 0.27  | 0.63  | 0.67                  | -0.43 | 0.81312 | 0.97170  | -0.08 | -0.30 | -0.13                      | -0.14                    | 0.04  | 0.14                  | -0.03 |      |                       |   |   |        |   |   |                       |   |   |
| RPneg_303.10904_11.103 | RP    | neg        | 11.103          | 303.1090   |            |      | 4        |         | 0.30468                                 | 0.63375 | -0.49 | 0.27   | -0.07 | -0.38 | 0.40                  | -0.50 | 0.49605 | 0.90020  | 0.12  | 0.38  | 0.30                       | -0.55                    | 0.29  | 0.09                  | 0.15  |      |                       |   |   |        |   |   |                       |   |   |
| HILICpos_303.124_0.79  | HILIC | pos        | 0.79            | 303.1240   |            |      | 4        |         | 0.22586                                 | 0.56751 | 0.44  | 0.08   | 0.70  | 0.37  | 0.89                  | 0.39  | 0.78011 | 0.96563  | -0.11 | -0.06 | -0.11                      | -0.16                    | 0.14  | -0.45                 | -0.18 |      |                       |   |   |        |   |   |                       |   |   |
| RPpos_303.1436_6.13    | RP    | pos        | 6.13            | 303.1436   |            |      | 4        |         | 0.77837                                 | 0.91288 | -0.11 | 0.29   | 1.02  | -0.08 | 0.56                  | 0.20  | 0.74645 | 0.96075  | -0.16 | 1.14  | 0.06                       | -0.60                    | -0.05 | -0.08                 | -0.54 |      |                       |   |   |        |   |   |                       |   |   |
| RPneg_303.14514_7.933  | RP    | neg        | 7.933           | 303.1451   |            |      | 4        |         | 0.01212                                 | 0.21031 | -0.70 | -0.12  | -0.56 | -0.40 | 0.13                  | -0.48 | 0.27119 | 0.78253  | 0.36  | -0.39 | 0.67                       | 0.75                     | 0.08  | 0.15                  | 0.78  |      |                       |   |   |        |   |   |                       |   |   |
| RPpos_303.1806_8.51    | RP    | pos        | 8.51            | 303.1806   |            |      | 4        |         | 0.75953                                 | 0.90495 | -0.05 | -0.16  | 0.47  | 0.05  | 0.16                  | -0.05 | 0.72296 | 0.95590  | -0.15 | -0.05 | 0.29                       | -0.20                    | -0.03 | -0.46                 | 0.27  |      |                       |   |   |        |   |   |                       |   |   |
| HILICpos_303.1915_3.92 | HILIC | pos        | 3.92            | 303.1915   |            |      | 4        |         | 0.41476                                 | 0.71918 | -0.06 | 0.06   | 0.06  | 0.05  | 0.15                  | -0.28 | 0.15828 | 0.66631  | 0.10  | -0.10 | 0.13                       | 0.05                     | 0.19  | 0.13                  | 0.03  |      |                       |   |   |        |   |   |                       |   |   |
| HILICneg_303.2282_5.08 | HILIC | neg        | 5.08            | 303.2282   |            |      | 4        |         | 0.87646                                 | 0.95375 | -0.05 | 0.17   | 0.17  | 0.03  | 0.07                  | -0.21 | 0.16123 | 0.67081  | 0.55  | 0.06  | 0.46                       | 0.64                     | 0.66  | 0.33                  | 0.49  |      |                       |   |   |        |   |   |                       |   |   |
| RPpos_303.232_7.41     | RP    | pos        | 7.41            | 303.2320   |            |      |          |         |                                         |         |       |        |       |       |                       |       |         |          |       |       |                            |                          |       |                       |       |      |                       |   |   |        |   |   |                       |   |   |







| Feature_ID             | Mode  | Ionization | Average_Rt.min. | Average_Mz | Metabolite | MSMS | ID_Level | HMDB_ID | IV-Alcohol self-administration (IV-ASA) |       |       |        |       |                       |       |          |         |       | IV-Alcohol clamp (IV-AC)   |       |       |       |       |                       |   |        |  |  |
|------------------------|-------|------------|-----------------|------------|------------|------|----------|---------|-----------------------------------------|-------|-------|--------|-------|-----------------------|-------|----------|---------|-------|----------------------------|-------|-------|-------|-------|-----------------------|---|--------|--|--|
|                        |       |            |                 |            |            |      |          |         | Area Under the Curve (AUC)              |       |       |        |       | IV-Ghrelin or Placebo |       |          |         |       | Area Under the Curve (AUC) |       |       |       |       | IV-Ghrelin or Placebo |   |        |  |  |
|                        |       |            |                 |            |            |      |          |         | Baseline                                |       |       | IV-ASA |       | BrAC=0                |       | Baseline |         |       | Post-LD                    |       | IV-AC |       |       | Post-AC               |   | BrAC=0 |  |  |
|                        |       |            |                 |            |            |      |          |         | p                                       | q     | d     | d      | d     | d                     | d     | d        | d       | p     | q                          | d     | d     | d     | d     | d                     | d | d      |  |  |
| RPpos_312.3263_11.52   | RP    | pos        | 11.52           | 312.3263   |            | 4    |          | 0.95818 | 0.98513                                 | 0.03  | 0.20  | 0.04   | 0.25  | 0.33                  | -0.78 | 0.50448  | 0.90327 | 0.41  | 1.99                       | -0.37 | 0.33  | -0.36 | 0.46  | 0.45                  |   |        |  |  |
| RPpos_312.6338_10.21   | RP    | pos        | 10.21           | 312.6338   |            | 4    |          | 0.01192 | 0.20924                                 | -0.45 | -0.21 | -0.24  | -0.44 | -0.09                 | -0.44 | 0.14401  | 0.64623 | -0.10 | -0.02                      | -0.08 | -0.18 | 0.00  | 0.01  | -0.19                 |   |        |  |  |
| RPpos_312.6407_10.37   | RP    | pos        | 10.37           | 312.6407   |            | 4    |          | 0.05207 | 0.34975                                 | -0.27 | -0.22 | -0.01  | 0.19  | -0.05                 | -0.46 | 0.64516  | 0.93813 | 0.21  | 0.09                       | 0.35  | 0.02  | 0.14  | 0.40  | 0.02                  |   |        |  |  |
| RPneg_312.83658_7.138  | RP    | neg        | 7.138           | 312.8366   |            | 4    |          | 0.57495 | 0.81611                                 | -0.12 | 0.08  | 0.01   | -0.10 | 0.15                  | -0.15 | 0.33682  | 0.82417 | 0.15  | 0.12                       | 0.19  | 0.10  | 0.23  | 0.21  | 0.04                  |   |        |  |  |
| HILICneg_312.8788_0.48 | HILIC | neg        | 0.48            | 312.8788   |            | 4    |          | 0.05484 | 0.35258                                 | 0.51  | 0.47  | 0.61   | 0.55  | 0.51                  | 0.71  | 0.09725  | 0.56769 | -0.65 | -0.66                      | -0.70 | -0.43 | -0.65 | -0.60 | -0.40                 |   |        |  |  |
| RPneg_312.87858_3.73   | RP    | neg        | 3.73            | 312.8786   |            | 4    |          | 0.08531 | 0.41318                                 | 0.43  | 0.49  | 0.44   | 0.36  | 0.41                  | 0.72  | 0.41611  | 0.85551 | -0.40 | -0.39                      | 0.32  | 0.51  | -0.40 | -0.39 | -0.23                 |   |        |  |  |
| HILICneg_312.9081_3.33 | HILIC | neg        | 3.33            | 312.9081   |            | 4    |          | 0.40776 | 0.71387                                 | -0.26 | -0.37 | 0.19   | 0.39  | 0.02                  | 0.43  | 0.44588  | 0.88022 | 0.08  | 0.70                       | 0.22  | -0.50 | -0.14 | 0.42  | 0.25                  |   |        |  |  |
| RPneg_313.0369_5.187   | RP    | neg        | 5.187           | 313.0369   |            | 4    |          | 0.59820 | 0.82782                                 | 0.17  | 0.10  | 0.37   | 0.59  | 0.16                  | 0.37  | 0.78734  | 0.96713 | 0.06  | -0.09                      | 0.03  | 0.19  | 0.18  | 0.14  | -0.09                 |   |        |  |  |
| HILICneg_313.0598_2.33 | HILIC | neg        | 2.33            | 313.0598   |            | 4    |          | 0.75611 | 0.90341                                 | 0.12  | 0.09  | 0.32   | 0.34  | 0.29                  | 0.14  | 0.07580  | 0.52146 | 0.01  | -0.09                      | 0.13  | 0.07  | 0.02  | -0.04 | -0.07                 |   |        |  |  |
| HILICpos_313.1045_6.18 | HILIC | pos        | 6.18            | 313.1045   |            | 4    |          | 0.26902 | 0.60509                                 | -0.28 | 0.59  | 0.48   | -0.28 | -0.49                 | 0.02  | 0.43716  | 0.87685 | 0.30  | 0.04                       | 0.38  | 0.89  | -0.31 | 0.23  | -0.07                 |   |        |  |  |
| HILICpos_313.1046_5.64 | HILIC | pos        | 5.64            | 313.1046   |            | 4    |          | 0.82074 | 0.93200                                 | 0.04  | 0.23  | 0.66   | 0.71  | 0.01                  | -0.16 | 0.00773  | 0.18616 | 0.48  | 0.46                       | 0.47  | 0.47  | 0.46  | 0.51  | -0.03                 |   |        |  |  |
| HILICpos_313.1048_5.8  | HILIC | pos        | 5.8             | 313.1048   |            | 4    |          | 0.63840 | 0.84710                                 | 0.15  | 0.25  | 0.55   | 0.73  | 0.23                  | -0.90 | 0.02273  | 0.31802 | 1.66  | 1.11                       | 1.28  | 1.73  | 0.77  | 1.10  | 0.36                  |   |        |  |  |
| HILICpos_313.105_5.92  | HILIC | pos        | 5.92            | 313.1050   |            | 4    |          | 0.74636 | 0.89885                                 | -0.06 | 0.30  | 0.41   | 0.16  | -0.09                 | -0.30 | 0.06063  | 0.48129 | 0.43  | 0.36                       | 0.41  | 0.68  | 0.64  | 0.27  | -0.70                 |   |        |  |  |
| HILICneg_313.1135_6.17 | HILIC | neg        | 6.17            | 313.1135   |            | 4    |          | 0.95171 | 0.98228                                 | -0.03 | 0.14  | 0.43   | 0.14  | 0.14                  | -0.14 | 0.02371  | 0.32541 | 0.28  | 0.36                       | 0.40  | 0.49  | 0.36  | 0.14  | -0.05                 |   |        |  |  |
| HILICneg_313.1193_0.57 | HILIC | neg        | 0.57            | 313.1193   |            | 4    |          | 0.72919 | 0.88966                                 | 0.32  | 0.60  | 0.74   | 0.23  | 0.71                  | -0.28 | 0.13629  | 0.63435 | 0.42  | 0.51                       | 0.53  | 0.60  | 0.81  | 0.38  | -0.33                 |   |        |  |  |
| HILICneg_313.1195_0.4  | HILIC | neg        | 0.4             | 313.1195   |            | 4    |          | 0.27405 | 0.60955                                 | 0.57  | 0.86  | 0.60   | 0.36  | 1.32                  | -0.02 | 0.38514  | 0.84935 | 0.43  | 0.50                       | 0.32  | 0.62  | 0.31  | 0.53  | 0.12                  |   |        |  |  |
| RPneg_313.11975_8.449  | RP    | neg        | 8.449           | 313.1198   |            | 4    |          | 0.76108 | 0.90510                                 | 0.08  | 0.00  | 0.09   | 0.22  | 0.61                  | -0.02 | 0.53559  | 0.91399 | -0.10 | -0.27                      | -0.06 | -0.06 | -0.08 | -0.08 | -0.11                 |   |        |  |  |
| RPneg_313.1209_7.552   | RP    | neg        | 7.552           | 313.1201   |            | 4    |          | 0.72781 | 0.89922                                 | 0.26  | 0.62  | 0.62   | 0.06  | 0.60                  | 0.27  | 0.31591  | 0.81259 | 0.44  | 0.55                       | 0.61  | 0.89  | 0.56  | 0.66  | -0.34                 |   |        |  |  |
| RPneg_313.12012_7.164  | RP    | neg        | 7.164           | 313.1201   |            | 4    |          | 0.42088 | 0.72359                                 | 0.42  | 0.65  | 0.66   | 0.23  | 0.84                  | -0.09 | 0.08839  | 0.70328 | 0.83  | 0.63                       | 0.79  | 1.18  | 0.66  | 0.93  | 0.18                  |   |        |  |  |
| RPneg_313.12015_6.685  | RP    | neg        | 6.685           | 313.1202   |            | 4    |          | 0.70838 | 0.88092                                 | 0.28  | 0.47  | 0.70   | 0.17  | 0.66                  | 0.13  | 0.19578  | 0.71031 | 0.40  | 0.62                       | 0.54  | 0.81  | 0.54  | 0.34  | -0.35                 |   |        |  |  |
| RPneg_313.12021_6.969  | RP    | neg        | 6.969           | 313.1202   |            | 4    |          | 0.59436 | 0.82618                                 | 0.32  | 0.80  | 0.47   | 0.00  | 0.74                  | 0.10  | 0.23733  | 0.75586 | 0.63  | 0.66                       | 0.61  | 1.24  | 0.33  | 0.88  | -0.14                 |   |        |  |  |
| HILICpos_313.1247_2.47 | HILIC | pos        | 2.47            | 313.1247   |            | 4    |          | 0.03173 | 0.29834                                 | -0.43 | -0.19 | -0.22  | -0.31 | -0.52                 | 0.36  | 0.61121  | 0.93043 | -0.35 | -0.06                      | 0.13  | -0.56 | -0.56 | -0.56 | 0.21                  |   |        |  |  |
| HILICpos_313.1542_1.71 | HILIC | pos        | 1.71            | 313.1542   |            | 4    |          | 0.70733 | 0.88052                                 | -0.16 | -0.33 | 0.02   | -0.42 | 0.35                  | 0.12  | 0.19301  | 0.70820 | 0.69  | 0.37                       | 0.29  | 0.69  | 0.33  | 1.20  | 0.80                  |   |        |  |  |
| HILICpos_313.1611_0.95 | HILIC | pos        | 0.95            | 313.1611   |            | 4    |          | 0.48934 | 0.77067                                 | -0.22 | -0.08 | 0.08   | 0.14  | 0.62                  | -0.13 | 0.66028  | 0.94253 | -0.03 | 0.24                       | 0.05  | -0.36 | -0.07 | 0.15  | 0.11                  |   |        |  |  |
| HILICpos_313.1614_5.92 | HILIC | pos        | 5.92            | 313.1614   |            | 4    |          | 0.55664 | 0.80760                                 | -0.16 | 0.41  | 0.33   | 0.08  | -0.01                 | -0.62 | 0.16026  | 0.66924 | 0.30  | 0.64                       | 0.34  | 0.59  | -0.16 | 0.28  | 0.20                  |   |        |  |  |
| HILICpos_313.1827_5.12 | HILIC | pos        | 5.12            | 313.1827   |            | 4    |          | 0.54411 | 0.80043                                 | -0.22 | 0.20  | 0.58   | -0.19 | -0.01                 | 0.30  | 0.00360  | 0.12242 | -0.26 | -0.25                      | -0.23 | -0.41 | -0.10 | 0.00  | -0.42                 |   |        |  |  |
| RPpos_313.2093_5.39    | RP    | pos        | 5.39            | 313.2093   |            | 4    |          | 0.31316 | 0.64120                                 | -0.29 | -0.11 | 0.64   | -0.25 | -0.32                 | 0.27  | 0.00420  | 0.13425 | -0.46 | -0.34                      | -0.20 | -0.49 | -0.21 | -0.26 | -0.42                 |   |        |  |  |
| RPpos_313.237_10.63    | RP    | pos        | 10.63           | 313.2370   |            | 4    |          | 0.16920 | 0.51386                                 | 0.41  | 0.63  | 0.71   | 0.39  | 0.84                  | 0.18  | 0.46344  | 0.88698 | -0.30 | -0.24                      | -0.08 | -0.27 | -0.09 | -0.79 | 0.12                  |   |        |  |  |
| RPpos_313.2372_8.91    | RP    | pos        | 8.91            | 313.2372   |            | 4    |          | 0.02028 | 0.25830                                 | 0.52  | 0.24  | 1.27   | 0.64  | 0.03                  | 0.50  | 0.02845  | 0.35209 | 0.49  | 0.05                       | 0.60  | 1.14  | -0.23 | 0.34  | 0.45                  |   |        |  |  |
| RPneg_313.23856_10.662 | RP    | neg        | 10.662          | 313.2386   |            | 4    |          | 0.24845 | 0.58802                                 | 0.23  | 0.42  | 0.36   | 0.35  | 0.94                  | 0.10  | 0.21622  | 0.73241 | 0.40  | 0.61                       | 0.41  | 0.44  | 0.41  | 0.37  | 0.35                  |   |        |  |  |
| RPneg_313.23865_8.988  | RP    | neg        | 8.988           | 313.2387   |            | 4    |          | 0.12995 | 0.46690                                 | 0.46  | 0.06  | 1.20   | 1.07  | 0.10                  | -0.09 | 0.00000  | 0.00016 | 0.76  | 0.18                       | 1.15  | 0.70  | 0.78  | 0.91  | 0.41                  |   |        |  |  |
| RPneg_313.2388_9.198   | RP    | neg        | 9.198           | 313.2388   |            | 4    |          | 0.03281 | 0.30196                                 | 0.45  | -0.10 | 1.84   | 0.55  | 0.04                  | 0.21  | 0.00011  | 0.01253 | 0.64  | -0.33                      | 1.04  | 1.16  | 0.06  | 0.27  | -0.40                 |   |        |  |  |
| HILICneg_313.239_0.42  | HILIC | neg        | 0.42            | 313.2390   |            | 4    |          | 0.00180 | 0.08579                                 | 0.14  | 0.09  | 1.97   | 1.22  | 0.00                  | -0.26 | 0.00388  | 0.12863 | 0.80  | 0.75                       | 0.78  | 1.30  | 0.38  | 0.70  | -0.08                 |   |        |  |  |
| RPneg_313.23914_9.13   | RP    | neg        | 9.13            | 313.2391   |            | 4    |          | 0.01341 | 0.20608                                 | 0.66  | -0.05 | 2.13   | 0.65  | 1.13                  | 0.09  | 0.00001  | 0.00149 | 0.89  | 0.86                       | 1.06  | 1.64  | 0.43  | 0.14  | -0.53                 |   |        |  |  |
| RPpos_313.2734_11.52   | RP    | pos        | 11.52           | 313.2734   |            | 4    |          | 0.19210 | 0.53748                                 | 0.16  | 0.03  | 0.14   | 0.16  | 0.65                  | -0.06 | 0.50578  | 0.90356 | 0.14  | 0.20                       | 0.08  | -0.13 | 0.46  | 0.15  | 0.07                  |   |        |  |  |
| RPpos_313.2737_10.16   | RP    | pos        | 10.16           | 313.2737   |            | 4    |          | 0.84151 | 0.94052                                 | -0.10 | 0.15  | 0.05   | 0.32  | 0.39                  | 0.20  | 0.51541  | 0.90684 | -0.07 | -0.15                      | -0.07 | -0.05 | -0.13 | 0.12  | -0.13                 |   |        |  |  |
| RPpos_313.2737_10.08   | RP    | pos        | 10.08           | 313.2737   |            | 4    |          | 0.96943 | 0.98852                                 | -0.06 | 0.09  | -0.14  | 0.79  | 0.84                  | 0.17  | 0.47780  | 0.89355 | -0.09 | -0.07                      | -0.06 | -0.10 | -0.11 | -0.10 | -0.01                 |   |        |  |  |
| RPpos_313.6418_10.37   | RP    | pos        | 10.37           | 313.6418   |            | 4    |          | 0.02006 | 0.25736                                 | -0.31 | -0.15 | -0.14  | -0.17 | 0.06                  | -0.27 | 0.84599  | 0.97713 | 0.17  | 0.24                       | 0.20  | -0.04 | 0.20  | 0.49  | -0.22                 |   |        |  |  |
| RPpos_313.642_10.48    | RP    | pos        | 10.48           | 313.6420   |            | 4    |          | 0.02137 | 0.26302                                 | -0.18 | -0.13 | -0.20  | -0.02 | 0.10                  | -0.20 | 0.47151  | 0.89111 | 0.43  | 0.54                       | 0.35  | 0.57  | 0.35  | 0.41  | -0.14                 |   |        |  |  |
| HILICneg_313.8604_0.48 | HILIC | neg        | 0.48            | 313.8604   |            | 4    |          | 0.86719 | 0.95029                                 | 0.02  | -0.05 | 0.20   | -0.09 | 0.07                  | 0.68  | 0.06304  | 0.48784 | -0.43 | -0.45                      | -0.45 | -0.43 | -0.35 | -0.45 | -0.37                 |   |        |  |  |
| HILICneg_314.0257_1.02 | HILIC | neg        | 1.02            | 314.0257   |            | 4    |          | 0.00053 | 0.04340                                 | 0.48  | 0.39  | 0.44   | 0.88  | 0.46                  | 0.30  | 0.87733  | 0.98224 | 0.03  | -0.21                      | -0.34 | 0.05  | 0.37  | 0.39  | -0.31                 |   |        |  |  |
| HILICpos_314.0287_4.84 | HILIC | pos        | 4.84            | 314.0287   |            | 4    |          | 0.51727 | 0.78667                                 | 0.18  | 0.18  | 0.98   | 0.44  | -0.04                 | -0.34 | 0.00489  | 0.14722 | 1.06  | 0.82                       | 0.55  | 2.03  | 1.08  | 0.53  | -0.36                 |   |        |  |  |
| RPneg_314.03192_6.594  | RP    | neg        | 6.594           | 314.0319   |            | 4    |          | 0.26653 | 0.60285                                 | -0.22 | -0.24 | -0.20  | -0.02 | -0.20                 | 0.22  | 0.28055  | 0.78924 | -0.28 | -0.29                      | -0.09 | -0.39 | -0.51 | -0.12 | -0.16                 |   |        |  |  |
| HILICneg_314.0372_4.33 | HILIC | neg        | 4.33            | 314.0372   |            | 4    |          | 0.86053 | 0.94770                                 | 0.04  | 0.26  | 0.45   | 0.10  | 0.09                  | -0.29 | 0.02778  | 0.34876 | 0.38  | 0.23                       | 0.49  | 0.15  | 0.38  | 0.26  | 0.10                  |   |        |  |  |
| HILICpos_314.0752_7.24 | HILIC | pos        | 7.24            | 314.0752   |            | 4    |          | 0.57573 | 0.81616                                 | 0.11  |       |        |       |                       |       |          |         |       |                            |       |       |       |       |                       |   |        |  |  |

| Feature_ID             | Mode  | Ionization | Average_Rt.min. | Average_Mz | Metabolite                                                                | MSMS | ID_Level | HMDB_ID | IV-Alcohol self-administration (IV-ASA) |         |        |       |        |       |                       |       |            |         |        |       | IV-Alcohol clamp (IV-AC)   |       |         |       |            |   |                       |   |         |   |        |   |
|------------------------|-------|------------|-----------------|------------|---------------------------------------------------------------------------|------|----------|---------|-----------------------------------------|---------|--------|-------|--------|-------|-----------------------|-------|------------|---------|--------|-------|----------------------------|-------|---------|-------|------------|---|-----------------------|---|---------|---|--------|---|
|                        |       |            |                 |            |                                                                           |      |          |         | Area Under the Curve (AUC)              |         |        |       |        |       | IV-Ghrelin or Placebo |       |            |         |        |       | Area Under the Curve (AUC) |       |         |       |            |   | IV-Ghrelin or Placebo |   |         |   |        |   |
|                        |       |            |                 |            |                                                                           |      |          |         | Baseline                                |         | IV-ASA |       | BRAC=0 |       | Baseline              |       | IV-Ghrelin |         | BRAC=0 |       | Baseline                   |       | Post-LD |       | IV-Ghrelin |   | IV-AC                 |   | Post-AC |   | BRAC=0 |   |
|                        |       |            |                 |            |                                                                           |      |          |         | p                                       | q       | d      | d     | d      | d     | p                     | q     | d          | d       | d      | d     | p                          | q     | d       | d     | d          | d | d                     | d | p       | q | d      | d |
| RPpos_315.6671_10.87   | RP    | pos        | 10.87           | 315.6671   |                                                                           |      | 4        |         | 0.00392                                 | 0.12836 | -0.63  | 0.09  | -0.22  | -0.52 | -0.99                 | -0.26 | 0.67849    | 0.94718 | 0.04   | -0.08 | 0.01                       | 0.02  | 0.29    | 0.08  | -0.21      |   |                       |   |         |   |        |   |
| RPpos_315.6873_5.39    | RP    | pos        | 5.39            | 315.6873   |                                                                           |      | 4        |         | 0.53633                                 | 0.79675 | -0.20  | -0.14 | 0.76   | -0.06 | -0.22                 | 0.25  | 0.00059    | 0.04048 | -0.47  | -0.25 | -0.48                      | -0.26 | -0.18   | -0.17 | -0.57      |   |                       |   |         |   |        |   |
| RPneg_315.83292_7.43   | RP    | neg        | 7.43            | 315.8329   |                                                                           |      | 4        |         | 0.06646                                 | 0.37877 | -0.18  | 0.15  | 0.01   | 0.05  | -0.17                 | 0.24  | 0.51369    | 0.90648 | -0.06  | -0.03 | -0.23                      | -0.22 | -0.08   | 0.11  | -0.28      |   |                       |   |         |   |        |   |
| HILICneg_315.8332_4.88 | HILIC | neg        | 4.88            | 315.8332   |                                                                           |      | 4        |         | 0.30979                                 | 0.63825 | -0.13  | 0.47  | 0.36   | -0.27 | -0.03                 | 0.57  | 0.05214    | 0.45452 | -0.41  | 0.11  | -0.92                      | -0.14 | -0.09   | -0.77 | -0.60      |   |                       |   |         |   |        |   |
| HILICneg_315.8583_0.48 | HILIC | neg        | 0.48            | 315.8583   |                                                                           |      | 4        |         | 0.86018                                 | 0.94767 | 0.02   | -0.01 | 0.16   | -0.07 | 0.02                  | 0.37  | 0.07229    | 0.51276 | -0.43  | -0.19 | -0.46                      | -0.46 | -0.40   | -0.40 | -0.30      |   |                       |   |         |   |        |   |
| HILICpos_315.8767_0.94 | HILIC | pos        | 0.94            | 315.8767   |                                                                           |      | 4        |         | 0.53339                                 | 0.79625 | 0.08   | 0.11  | 0.27   | 0.02  | 0.28                  | -0.24 | 0.00749    | 0.13338 | -0.48  | -0.44 | -0.52                      | -0.48 | -0.30   | -0.37 | -0.52      |   |                       |   |         |   |        |   |
| RPneg_316.01428_2.112  | RP    | neg        | 2.112           | 316.0143   |                                                                           |      | 4        |         | 0.53112                                 | 0.79398 | -0.18  | 0.17  | 1.08   | 0.08  | -0.51                 | -0.72 | 0.00015    | 0.01612 | 1.36   | 0.80  | 2.80                       | 2.82  | 1.48    | 1.01  | -0.07      |   |                       |   |         |   |        |   |
| HILICneg_316.042_5.18  | HILIC | neg        | 5.18            | 316.0420   |                                                                           |      | 4        |         | 0.37458                                 | 0.69002 | -0.26  | 0.05  | 1.12   | 0.50  | 0.25                  | -0.06 | 0.20977    | 0.72623 | 0.41   | -0.11 | 0.86                       | 0.68  | 0.74    | -0.03 | -0.16      |   |                       |   |         |   |        |   |
| RPneg_316.06189_9.257  | RP    | neg        | 9.257           | 316.0619   |                                                                           |      | 4        |         | 0.29720                                 | 0.62796 | 0.39   | 0.11  | 1.10   | 0.69  | 0.76                  | -0.47 | 0.45146    | 0.88250 | 0.36   | 0.45  | 0.62                       | 0.01  | -0.14   | 0.27  | -0.04      |   |                       |   |         |   |        |   |
| HILICneg_316.0817_0.97 | HILIC | neg        | 0.97            | 316.0817   |                                                                           |      | 4        |         | 0.61776                                 | 0.83757 | 0.16   | 0.32  | 0.26   | 0.19  | 0.56                  | -0.28 | 0.30178    | 0.80313 | 0.26   | 0.27  | 0.37                       | -0.04 | 0.78    | 0.08  | 0.23       |   |                       |   |         |   |        |   |
| RPpos_316.0969_7.99    | RP    | pos        | 7.99            | 316.0969   |                                                                           |      | 4        |         | 0.97929                                 | 0.99202 | 0.00   | 0.03  | 0.04   | 0.08  | 0.15                  | -0.01 | 0.08997    | 0.55360 | 0.50   | 0.58  | 0.48                       | 0.44  | 0.41    | 0.53  | 0.45       |   |                       |   |         |   |        |   |
| HILICneg_316.1006_0.89 | HILIC | neg        | 0.89            | 316.1006   |                                                                           |      | 4        |         | 0.08131                                 | 0.40595 | 0.38   | 0.27  | 0.80   | 0.50  | 0.49                  | -0.06 | 0.06172    | 0.48417 | 0.42   | 0.39  | 0.45                       | 0.35  | 0.63    | 1.00  | -0.23      |   |                       |   |         |   |        |   |
| HILICneg_316.1018_2.98 | HILIC | neg        | 2.98            | 316.1018   |                                                                           |      | 4        |         | 0.79793                                 | 0.92198 | 0.09   | 0.20  | 0.02   | 0.24  | 0.41                  | 0.22  | 0.27027    | 0.78219 | 0.28   | -0.01 | -0.04                      | 0.22  | 0.41    | 0.61  | -0.05      |   |                       |   |         |   |        |   |
| HILICpos_316.1178_0.44 | HILIC | pos        | 0.44            | 316.1178   |                                                                           |      | 4        |         | 0.48636                                 | 0.76842 | -0.13  | -0.05 | -0.22  | -0.07 | 0.07                  | -0.14 | 0.10501    | 0.58172 | 3.86   | 5.21  | 3.57                       | 3.42  | 3.16    | 3.20  | 2.59       |   |                       |   |         |   |        |   |
| RPpos_316.1187_7.39    | RP    | pos        | 7.39            | 316.1187   |                                                                           |      | 4        |         | 0.36817                                 | 0.68469 | -0.13  | -0.08 | -0.05  | -0.12 | -0.02                 | -0.20 | 0.09612    | 0.56553 | 3.10   | 2.91  | 3.01                       | 2.97  | 3.44    | 3.16  | 2.50       |   |                       |   |         |   |        |   |
| RPneg_316.1188_6.942   | RP    | neg        | 6.942           | 316.1188   |                                                                           |      | 4        |         | 0.55864                                 | 0.80871 | -0.16  | -0.28 | -0.04  | -0.04 | 0.26                  | -0.33 | 0.00020    | 0.01980 | 1.71   | 2.30  | 1.76                       | 1.57  | 1.78    | 1.38  | 0.62       |   |                       |   |         |   |        |   |
| RPneg_316.16623_4.707  | RP    | neg        | 4.707           | 316.1662   |                                                                           |      | 4        |         | 0.91788                                 | 0.97020 | -0.01  | 0.25  | 0.37   | 0.35  | 0.02                  | 0.25  | 0.59625    | 0.92780 | 0.20   | 0.17  | 0.30                       | 0.00  | 0.27    | 0.18  | 0.13       |   |                       |   |         |   |        |   |
| RPpos_316.1761_2.12    | RP    | pos        | 2.12            | 316.1761   | 166.0854 (100), 120.0807 (75), 84.9596 (15), 100.0759 (15), 316.0515 (10) |      | 4        |         | 0.58574                                 | 0.82162 | -0.14  | 0.25  | 1.02   | 0.12  | -0.30                 | -0.74 | 0.00000    | 0.00037 | 0.93   | 0.74  | 1.57                       | 1.56  | 1.08    | 0.74  | 0.00       |   |                       |   |         |   |        |   |
| HILICpos_316.212_3.04  | HILIC | pos        | 3.04            | 316.2120   |                                                                           |      | 4        |         | 0.09547                                 | 0.42560 | -0.43  | -0.39 | -0.29  | -0.03 | 0.21                  | 0.34  | 0.91375    | 0.98749 | -0.06  | 0.37  | 0.04                       | 0.58  | -0.02   | -0.17 | 0.19       |   |                       |   |         |   |        |   |
| RPneg_316.24927_7.255  | RP    | neg        | 7.255           | 316.2493   |                                                                           |      | 4        |         | 0.17681                                 | 0.52261 | 0.62   | 0.33  | 0.84   | 0.57  | 0.63                  | -0.15 | 0.04464    | 0.42421 | 0.90   | 1.01  | 0.93                       | 0.77  | 0.48    | 0.76  | -0.06      |   |                       |   |         |   |        |   |
| HILICneg_316.9208_0.92 | HILIC | neg        | 0.92            | 316.9208   |                                                                           |      | 4        |         | 0.44825                                 | 0.74281 | -0.17  | -0.22 | -0.14  | 0.15  | -0.20                 | -0.05 | 0.27660    | 0.78625 | -0.29  | -0.46 | -0.04                      | -0.19 | -0.33   | -0.16 | -0.20      |   |                       |   |         |   |        |   |
| HILICneg_316.9472_4.42 | HILIC | neg        | 4.42            | 316.9472   |                                                                           |      | 4        |         | 0.19947                                 | 0.54398 | -0.46  | -0.14 | 0.05   | -0.16 | -0.17                 | 0.03  | 0.82509    | 0.97379 | -0.03  | 0.05  | -0.08                      | -0.22 | 0.04    | 0.06  | 0.26       |   |                       |   |         |   |        |   |
| RPneg_316.96277_2.111  | RP    | neg        | 2.111           | 316.9628   |                                                                           |      | 4        |         | 0.68007                                 | 0.86708 | -0.10  | 0.09  | 1.05   | 0.06  | -0.40                 | -0.72 | 0.00016    | 0.01670 | 1.49   | 0.88  | 2.28                       | 2.14  | 1.69    | 1.08  | 0.04       |   |                       |   |         |   |        |   |
| RPneg_316.96289_1.302  | RP    | neg        | 1.302           | 316.9629   |                                                                           |      | 4        |         | 0.60020                                 | 0.82875 | 0.13   | -0.09 | 1.14   | 0.20  | -0.12                 | -0.37 | 0.24414    | 0.76042 | 0.35   | 0.26  | 1.13                       | 2.19  | 0.10    | -0.21 | -0.13      |   |                       |   |         |   |        |   |
| RPneg_316.96402_3.731  | RP    | neg        | 3.731           | 316.9640   |                                                                           |      | 4        |         | 0.21270                                 | 0.55529 | 0.31   | 0.40  | 0.65   | 0.16  | 0.32                  | 0.55  | 0.17842    | 0.69344 | -0.50  | -0.38 | -0.40                      | -0.46 | -0.54   | -0.46 | -0.39      |   |                       |   |         |   |        |   |
| HILICpos_316.9816_5.33 | HILIC | pos        | 5.33            | 316.9816   |                                                                           |      | 4        |         | 0.11791                                 | 0.45349 | -0.44  | -0.13 | 0.25   | -0.34 | -0.35                 | -0.20 | 0.54964    | 0.91736 | -0.28  | 0.22  | -0.04                      | -0.62 | -0.13   | -0.28 | 0.18       |   |                       |   |         |   |        |   |
| HILICneg_316.995_3.58  | HILIC | neg        | 3.58            | 316.9950   |                                                                           |      | 4        |         | 0.47333                                 | 0.75975 | 0.16   | 0.31  | 0.40   | -0.01 | 0.54                  | 0.28  | 0.73687    | 0.95869 | -0.05  | -0.27 | -0.04                      | -0.13 | 0.28    | -0.25 | -0.19      |   |                       |   |         |   |        |   |
| HILICneg_317.021_4.11  | HILIC | neg        | 4.11            | 317.0210   |                                                                           |      | 4        |         | 0.03760                                 | 0.31436 | 0.41   | 0.35  | 1.43   | 0.60  | 0.02                  | -0.54 | 0.00555    | 0.15687 | 1.12   | 0.21  | 1.44                       | 1.56  | 0.55    | 0.15  | -0.04      |   |                       |   |         |   |        |   |
| HILICneg_317.0486_6.29 | HILIC | neg        | 6.29            | 317.0486   |                                                                           |      | 4        |         | 0.87390                                 | 0.95270 | 0.06   | 0.16  | 0.60   | 0.30  | -0.13                 | -0.59 | 0.21102    | 0.72774 | 0.27   | 0.12  | 0.19                       | 0.92  | 0.20    | 0.07  | -0.55      |   |                       |   |         |   |        |   |
| RPneg_317.06326_2.811  | RP    | neg        | 2.811           | 317.0633   |                                                                           |      | 4        |         | 0.22481                                 | 0.56687 | -0.29  | 0.16  | 0.43   | -0.05 | -0.65                 | -0.69 | 0.81085    | 0.97155 | -0.12  | -0.08 | -0.04                      | 0.13  | 0.00    | -0.28 | -0.47      |   |                       |   |         |   |        |   |
| RPneg_317.06998_6.17   | RP    | neg        | 6.17            | 317.0700   |                                                                           |      | 4        |         | 0.65976                                 | 0.85748 | 0.07   | 0.03  | 0.17   | 0.16  | 0.06                  | -0.01 | 0.57839    | 0.94718 | -0.13  | 0.05  | 0.10                       | 0.13  | 0.15    | 0.27  | 0.00       |   |                       |   |         |   |        |   |
| RPpos_317.105_8.45     | RP    | pos        | 8.45            | 317.1055   |                                                                           |      | 4        |         | 0.21805                                 | 0.55999 | -0.35  | -0.11 | -0.16  | -0.20 | -0.28                 | -0.12 | 0.82554    | 0.97389 | -0.16  | -0.05 | 0.34                       | 0.71  | 0.33    | 0.97  | 0.29       |   |                       |   |         |   |        |   |
| RPpos_317.1051_8.51    | RP    | pos        | 8.51            | 317.1051   |                                                                           |      | 4        |         | 0.36609                                 | 0.68319 | -0.25  | -0.19 | 0.01   | -0.07 | -0.24                 | 0.21  | 0.70583    | 0.95248 | -0.05  | -0.27 | 1.14                       | 0.54  | 0.28    | -0.12 | -0.02      |   |                       |   |         |   |        |   |
| RPneg_317.11404_5.605  | RP    | neg        | 5.605           | 317.1140   |                                                                           |      | 4        |         | 0.19938                                 | 0.54392 | 0.51   | 0.67  | 0.92   | 0.44  | 0.79                  | -0.20 | 0.16586    | 0.67711 | 0.97   | 1.33  | 1.18                       | 1.28  | 0.90    | 0.85  | 0.05       |   |                       |   |         |   |        |   |
| RPneg_317.11407_5.793  | RP    | neg        | 5.793           | 317.1141   |                                                                           |      | 4        |         | 0.25220                                 | 0.59103 | 0.49   | 0.57  | 0.96   | 0.46  | 0.79                  | -0.22 | 0.13179    | 0.62676 | 1.00   | 1.44  | 1.19                       | 1.31  | 0.99    | 0.76  | 0.09       |   |                       |   |         |   |        |   |
| RPneg_317.11407_5.913  | RP    | neg        | 5.913           | 317.1141   |                                                                           |      | 4        |         | 0.26389                                 | 0.60089 | 0.47   | 0.58  | 0.92   | 0.45  | 0.74                  | -0.25 | 0.15081    | 0.65597 | 1.00   | 1.46  | 1.22                       | 1.30  | 0.98    | 0.71  | 0.20       |   |                       |   |         |   |        |   |
| RPneg_317.12372_11.543 | RP    | neg        | 11.543          | 317.1237   |                                                                           |      | 4        |         | 0.62545                                 | 0.84113 | 0.24   | 0.01  | 0.22   | 0.56  | 0.36                  | 0.65  | 0.47109    | 0.89070 | 0.26   | -0.06 | 0.86                       | -0.11 | -0.11   | 1.30  | -0.21      |   |                       |   |         |   |        |   |
| HILICneg_317.1373_0.96 | HILIC | neg        | 0.96            | 317.1373   |                                                                           |      | 4        |         | 0.57965                                 | 0.81821 | -0.09  | 0.00  | 0.38   | -0.18 | 0.48                  | -0.47 | 0.58938    | 0.92655 | -0.12  | -0.25 | 0.39                       | -0.11 | 0.07    | -0.21 | -0.11      |   |                       |   |         |   |        |   |
| RPneg_317.15021_6.345  | RP    | neg        | 6.345           | 317.1502   |                                                                           |      | 4        |         | 0.11860                                 | 0.45492 | 0.72   | 0.18  | 1.03   | 0.85  | 1.00                  | -0.18 | 0.02482    | 0.33212 | 0.47   | 0.16  | 0.32                       | 0.58  | 0.73    | 0.60  | 0.30       |   |                       |   |         |   |        |   |
| RPneg_317.15039_6.164  | RP    | neg        | 6.164           | 317.1504   |                                                                           |      | 4        |         | 0.10450                                 | 0.43740 | 0.50   | 0.03  | 0.73   | 0.52  | 0.93                  | -0.13 | 0.03502    | 0.38303 | 0.71   | 0.28  | 0.47                       | 0.85  | 0.88    | 0.91  | 0.72       |   |                       |   |         |   |        |   |
| RPneg_317.16086_7.745  | RP    | neg        | 7.745           | 317.1609   |                                                                           |      | 4        |         | 0.23487                                 | 0.57650 | 0.35   | -0.18 | 0.91   | 0.56  | 0.10                  | 0.05  | 0.00609    | 0.16487 | 0.61   | 0.48  | 0.30                       | -0.06 | 0.78    | 0.61  | 0.04       |   |                       |   |         |   |        |   |
| RPpos_317.164_10.03    | RP    | pos        | 10.03           | 317.1640   |                                                                           |      | 4        |         | 0.24301                                 | 0.58044 | 0.79   | -0.06 | 0.65   | 0.94  | 1.36                  | 0.00  | 0.43958    | 0.87818 | 0.16   | 0.67  | 0.52                       | 0.15  | 0.27    | -0.08 | -0.10      |   |                       |   |         |   |        |   |
| RPpos_317.1795_10.65   | RP    | pos        | 10.65           | 317.1795   |                                                                           |      | 4        |         | 0.00043                                 | 0.03792 | 1.25   | -0.09 | 0.66   | 0.81  | 2.29                  | 0.04  | 0.94686    | 0.99279 | -0.07  | -0.06 | 0.32                       | -0.17 | -0.10   | -0.18 | -0.06      |   |                       |   |         |   |        |   |
| RPneg_317.22513_11.188 | RP    | neg        |                 |            |                                                                           |      |          |         |                                         |         |        |       |        |       |                       |       |            |         |        |       |                            |       |         |       |            |   |                       |   |         |   |        |   |





| Feature_ID             | Mode | Ionization | Average_RT.min. | Average_Mz | Metabolite | MSMS | ID_Level | HMDB_ID | IV-Alcohol self-administration (IV-ASA) |         |        |       |        |       |                       |       |                       |         |        |       | IV-Alcohol clamp (IV-AC)   |       |         |       |                       |   |                       |   |   |   |   |   |
|------------------------|------|------------|-----------------|------------|------------|------|----------|---------|-----------------------------------------|---------|--------|-------|--------|-------|-----------------------|-------|-----------------------|---------|--------|-------|----------------------------|-------|---------|-------|-----------------------|---|-----------------------|---|---|---|---|---|
|                        |      |            |                 |            |            |      |          |         | Area Under the Curve (AUC)              |         |        |       |        |       | IV-Ghrelin or Placebo |       |                       |         |        |       | Area Under the Curve (AUC) |       |         |       |                       |   | IV-Ghrelin or Placebo |   |   |   |   |   |
|                        |      |            |                 |            |            |      |          |         | Baseline                                |         | IV-ASA |       | BRAC=0 |       | Baseline              |       | IV-Ghrelin or Placebo |         | BRAC=0 |       | Baseline                   |       | Post-LD |       | IV-Ghrelin or Placebo |   | BRAC=0                |   |   |   |   |   |
|                        |      |            |                 |            |            |      |          |         | p                                       | q       | d      | d     | d      | d     | p                     | q     | d                     | d       | d      | d     | p                          | q     | d       | d     | d                     | d | p                     | q | d | d | d | d |
| RPneg_323.22037_13.185 | RP   | neg        | 13.185          | 323.2204   |            |      | 4        |         | 0.53767                                 | 0.79745 | -0.20  | 0.777 | -0.39  | -0.04 | 0.25                  | -0.30 | 0.24445               | 0.76082 | -0.21  | 0.46  | -0.35                      | -0.21 | -0.37   | -0.34 | -0.16                 |   |                       |   |   |   |   |   |
| RPneg_323.22314_10.664 | RP   | neg        | 10.664          | 323.2231   |            |      | 4        |         | 0.00056                                 | 0.04497 | 1.50   | -0.15 | 0.65   | 0.96  | 2.82                  | -0.03 | 0.92774               | 0.98945 | -0.07  | -0.03 | 0.32                       | -0.14 | -0.14   | -0.25 | -0.07                 |   |                       |   |   |   |   |   |
| RPpos_323.2249_11.52   | RP   | pos        | 11.52           | 323.2249   |            |      | 4        |         | 0.20584                                 | 0.54951 | -0.29  | -0.15 | -0.06  | 0.19  | 0.12                  | -0.16 | 0.82393               | 0.97343 | -0.06  | -0.58 | -0.41                      | -0.55 | 0.44    | 0.34  | -0.44                 |   |                       |   |   |   |   |   |
| RPneg_323.25952_10.719 | RP   | neg        | 10.719          | 323.2595   |            |      | 4        |         | 0.88236                                 | 0.95651 | 0.06   | 0.24  | 0.14   | -0.01 | 0.32                  | 0.33  | 0.54088               | 0.91464 | 0.42   | 0.28  | 0.34                       | 0.02  | 0.36    | 0.37  | 0.53                  |   |                       |   |   |   |   |   |
| RPpos_323.9958_3.73    | RP   | pos        | 3.73            | 323.9958   |            |      | 4        |         | 0.22448                                 | 0.56687 | 0.35   | 0.27  | 0.30   | 0.14  | 0.76                  | 0.00  | 0.18116               | 0.69610 | -0.60  | -0.46 | -0.48                      | -0.57 | -0.48   | -0.55 | -0.63                 |   |                       |   |   |   |   |   |
| RPpos_323.9960_2.44    | RP   | pos        | 2.44            | 323.9960   |            |      | 4        |         | 0.68150                                 | 0.86713 | -0.13  | 0.00  | -0.06  | -0.22 | -0.09                 | 0.22  | 0.132858              | 0.62930 | 0.30   | 0.42  | 0.30                       | 0.07  | 0.31    | 0.20  | 0.54                  |   |                       |   |   |   |   |   |
| RPneg_324.06644_9.362  | RP   | neg        | 9.362           | 324.0664   |            |      | 4        |         | 0.23474                                 | 0.57638 | -0.24  | -0.15 | 0.42   | 0.23  | 0.41                  | 0.02  | 0.42457               | 0.87062 | 0.07   | 0.51  | 0.29                       | 0.01  | -0.35   | 0.06  | -0.32                 |   |                       |   |   |   |   |   |
| RPneg_324.07248_2.841  | RP   | neg        | 2.841           | 324.0725   |            |      | 4        |         | 0.81517                                 | 0.92958 | 0.08   | 0.30  | 0.09   | 0.16  | 0.15                  | -0.10 | 0.23129               | 0.74808 | 0.18   | 0.07  | 0.25                       | 0.21  | 0.07    | 0.18  | 0.36                  |   |                       |   |   |   |   |   |
| RPneg_324.07263_1.616  | RP   | neg        | 1.616           | 324.0726   |            |      | 4        |         | 0.04091                                 | 0.32333 | 0.34   | 0.35  | 0.63   | 0.31  | 0.41                  | 0.18  | 0.11003               | 0.59152 | 0.23   | 0.03  | 0.17                       | 0.26  | 0.28    | 0.23  | 0.40                  |   |                       |   |   |   |   |   |
| HLICneg_324.0732_5.73  | HLIC | neg        | 5.73            | 324.0732   |            |      | 4        |         | 0.01730                                 | 0.24173 | 0.36   | 0.31  | 0.62   | 0.35  | 0.43                  | 0.13  | 0.12910               | 0.62214 | 0.22   | -0.04 | 0.08                       | 0.17  | 0.25    | 0.45  | 0.37                  |   |                       |   |   |   |   |   |
| RPpos_324.0996_8.3     | RP   | pos        | 8.3             | 324.0996   |            |      | 4        |         | 0.82114                                 | 0.93204 | 0.00   | 0.15  | 0.25   | 0.09  | -0.02                 | -0.37 | 0.03924               | 0.40374 | 1.65   | 1.51  | 1.24                       | 1.83  | 2.09    | 1.35  | 0.86                  |   |                       |   |   |   |   |   |
| HLICpos_324.1101_4.21  | HLIC | pos        | 4.21            | 324.1101   |            |      | 4        |         | 0.36251                                 | 0.68070 | 0.24   | 0.20  | 1.22   | 0.32  | -0.12                 | -0.35 | 0.00898               | 0.20151 | 0.66   | 0.51  | 1.07                       | 1.28  | 0.67    | 0.15  | -0.54                 |   |                       |   |   |   |   |   |
| HLICpos_324.1109_3.95  | HLIC | pos        | 3.95            | 324.1109   |            |      | 4        |         | 0.28478                                 | 0.61830 | 0.24   | 0.22  | 1.06   | 0.25  | 0.05                  | -0.58 | 0.02738               | 0.34702 | 0.80   | 0.30  | 1.01                       | 1.67  | 0.78    | 0.16  | -0.47                 |   |                       |   |   |   |   |   |
| RPpos_324.2014_5.64    | RP   | pos        | 5.64            | 324.2014   |            |      | 4        |         | 0.34078                                 | 0.66309 | -0.34  | 0.38  | 0.60   | -0.13 | 0.69                  | -0.10 | 0.72456               | 0.95590 | -0.13  | 0.79  | -0.25                      | -0.21 | 0.18    | -0.50 | -0.83                 |   |                       |   |   |   |   |   |
| HLICpos_324.2014_0.41  | HLIC | pos        | 0.41            | 324.2014   |            |      | 4        |         | 0.41119                                 | 0.71620 | -0.29  | 0.05  | 0.22   | -0.07 | 0.64                  | -0.07 | 0.56245               | 0.92016 | -0.14  | 0.74  | 0.05                       | -0.48 | 0.03    | -0.44 | -0.26                 |   |                       |   |   |   |   |   |
| RPpos_324.327_11.37    | RP   | pos        | 11.37           | 324.3270   |            |      | 4        |         | 0.87735                                 | 0.95405 | 0.06   | 0.39  | 0.10   | 0.16  | 0.19                  | -0.81 | 0.88651               | 0.98320 | 0.12   | 1.06  | -0.04                      | 0.29  | -0.41   | 0.12  | 0.01                  |   |                       |   |   |   |   |   |
| RPpos_324.6457_5.45    | RP   | pos        | 5.45            | 324.6457   |            |      | 4        |         | 0.23977                                 | 0.58097 | 0.23   | 0.31  | 0.49   | 0.12  | 0.30                  | 0.54  | 0.43574               | 0.87641 | -0.18  | -0.21 | -0.05                      | -0.07 | -0.19   | -0.24 | -0.34                 |   |                       |   |   |   |   |   |
| RPpos_324.7126_6.67    | RP   | pos        | 6.67            | 324.7126   |            |      | 4        |         | 0.89730                                 | 0.96266 | -0.05  | 0.33  | 0.34   | 0.41  | -0.18                 | 0.51  | 0.47985               | 0.89457 | -0.29  | 0.04  | -0.14                      | -0.22 | 0.12    | -0.82 | -0.25                 |   |                       |   |   |   |   |   |
| HLICneg_324.8415_0.53  | HLIC | neg        | 0.53            | 324.8415   |            |      | 4        |         | 0.00941                                 | 0.18925 | -0.33  | -0.12 | -0.19  | -0.12 | -0.12                 | 0.34  | 0.58352               | 0.94838 | 0.00   | 0.03  | -0.08                      | -0.12 | -0.14   | 0.04  | 0.08                  |   |                       |   |   |   |   |   |
| HLICneg_324.9132_4.05  | HLIC | neg        | 4.05            | 324.9132   |            |      | 4        |         | 0.56963                                 | 0.81380 | -0.16  | 0.11  | 0.73   | 0.00  | -0.51                 | 0.83  | 0.00074               | 0.04684 | 0.95   | 0.64  | 1.92                       | 1.93  | 0.83    | 0.27  | 0.05                  |   |                       |   |   |   |   |   |
| RPneg_324.91348_2.114  | RP   | neg        | 2.114           | 324.9135   |            |      | 4        |         | 0.88331                                 | 0.95680 | -0.04  | 0.16  | 0.76   | 0.16  | -0.20                 | -0.74 | 0.00296               | 0.10911 | 0.93   | 0.40  | 1.23                       | 1.58  | 0.61    | 1.21  | 0.04                  |   |                       |   |   |   |   |   |
| HLICneg_324.9868_1.49  | HLIC | neg        | 1.49            | 324.9868   |            |      | 4        |         | 0.01267                                 | 0.21548 | -0.57  | -0.18 | -0.35  | -0.70 | -0.46                 | -0.22 | 0.00000               | 0.00032 | -0.68  | -0.37 | -0.33                      | -0.66 | -0.87   | -0.91 | -0.57                 |   |                       |   |   |   |   |   |
| HLICneg_325.0045_1.59  | HLIC | neg        | 1.59            | 325.0045   |            |      | 4        |         | 0.79539                                 | 0.92065 | 0.06   | 0.23  | 0.34   | 0.05  | 0.33                  | -0.07 | 0.04235               | 0.41598 | -0.39  | -0.35 | -0.17                      | -0.50 | -0.30   | -0.30 | -0.41                 |   |                       |   |   |   |   |   |
| HLICneg_325.0324_2.57  | HLIC | neg        | 2.57            | 325.0324   |            |      | 4        |         | 0.03472                                 | 0.30583 | -0.48  | -0.22 | -0.33  | -0.29 | -0.54                 | 0.38  | 0.44815               | 0.88106 | -0.46  | -0.11 | 0.09                       | -0.84 | -0.77   | -0.60 | 0.33                  |   |                       |   |   |   |   |   |
| HLICpos_325.0378_4.18  | HLIC | pos        | 4.18            | 325.0378   |            |      | 4        |         | 0.65859                                 | 0.85709 | -0.05  | 0.18  | 0.23   | 0.14  | 0.12                  | 0.01  | 0.13320               | 0.63013 | 0.14   | 0.46  | 0.08                       | -0.11 | 0.23    | 0.23  | 0.16                  |   |                       |   |   |   |   |   |
| RPneg_325.04163_2.835  | RP   | neg        | 2.835           | 325.0416   |            |      | 4        |         | 0.84886                                 | 0.94346 | -0.01  | 0.05  | 0.05   | 0.04  | 0.10                  | -0.18 | 0.14814               | 0.65146 | 1.58   | 1.59  | 2.05                       | 1.38  | 1.44    | 1.66  | 1.10                  |   |                       |   |   |   |   |   |
| HLICneg_325.0727_1.37  | HLIC | neg        | 1.37            | 325.0727   |            |      | 4        |         | 0.92436                                 | 0.97276 | -0.14  | 0.04  | 0.04   | -0.08 | -0.31                 | -0.49 | 0.06591               | 0.49610 | -0.33  | -0.25 | -0.14                      | -0.38 | -0.26   | -0.37 | -0.64                 |   |                       |   |   |   |   |   |
| RPneg_325.0831_8.768   | RP   | neg        | 8.768           | 325.0831   |            |      | 4        |         | 0.27295                                 | 0.60896 | -0.19  | -0.09 | -0.20  | -0.24 | 0.02                  | -0.01 | 0.16119               | 0.67081 | 0.09   | 0.02  | 0.17                       | -0.06 | 0.17    | -0.04 | 0.31                  |   |                       |   |   |   |   |   |
| HLICneg_325.1257_6.28  | HLIC | neg        | 6.28            | 325.1257   |            |      | 4        |         | 0.18591                                 | 0.53269 | 0.38   | 0.13  | 0.88   | 0.49  | 0.57                  | -0.41 | 0.09817               | 0.56890 | 0.36   | 0.26  | 0.38                       | 0.43  | 0.52    | 0.19  | -0.12                 |   |                       |   |   |   |   |   |
| RPpos_325.1264_6.13    | RP   | pos        | 6.13            | 325.1264   |            |      | 4        |         | 0.81239                                 | 0.92836 | -0.09  | 0.42  | 1.02   | -0.12 | 0.57                  | 0.18  | 0.97022               | 0.99673 | -0.03  | 1.43  | 0.03                       | -0.46 | 0.00    | -0.01 | -0.48                 |   |                       |   |   |   |   |   |
| HLICpos_325.1514_3.4   | HLIC | pos        | 3.4             | 325.1514   |            |      | 4        |         | 0.33884                                 | 0.66166 | -0.15  | -0.12 | -0.12  | -0.15 | -0.18                 | -0.58 | 0.59940               | 0.92780 | -0.08  | -0.10 | -0.08                      | 0.01  | -0.09   | -0.15 | -0.07                 |   |                       |   |   |   |   |   |
| RPpos_325.1773_5.82    | RP   | pos        | 5.82            | 325.1773   |            |      | 4        |         | 0.59202                                 | 0.82490 | 0.21   | 0.60  | -0.20  | 0.66  | 0.66                  | 0.48  | 0.88916               | 0.85117 | 0.57   | 0.20  | 0.26                       | 0.37  | 0.05    | 0.42  | 0.51                  |   |                       |   |   |   |   |   |
| HLICneg_325.1846_0.48  | HLIC | neg        | 0.48            | 325.1846   |            |      | 4        |         | 0.32311                                 | 0.55209 | -0.30  | -0.25 | -0.40  | -0.02 | -0.34                 | 0.08  | 0.80794               | 0.98699 | 0.07   | 0.30  | 0.69                       | -0.25 | 0.14    | -0.30 | 0.57                  |   |                       |   |   |   |   |   |
| RPpos_325.1989_8.08    | RP   | pos        | 8.08            | 325.1989   |            |      | 4        |         | 0.07944                                 | 0.40310 | -0.74  | -0.13 | -0.08  | -0.17 | -0.52                 | 0.22  | 0.67035               | 0.94545 | 0.17   | 0.35  | 0.76                       | 0.00  | 0.34    | -0.67 | 0.82                  |   |                       |   |   |   |   |   |
| RPpos_325.2057_10.74   | RP   | pos        | 10.74           | 325.2057   |            |      | 4        |         | 0.00947                                 | 0.18974 | 1.01   | -0.05 | 0.28   | 0.71  | 2.36                  | -0.24 | 0.93539               | 0.99000 | -0.01  | -0.17 | 0.55                       | -0.23 | -0.05   | -0.14 | -0.07                 |   |                       |   |   |   |   |   |
| RPpos_325.2112_10.9    | RP   | pos        | 10.9            | 325.2112   |            |      | 4        |         | 0.00221                                 | 0.09529 | 1.27   | -0.13 | 0.88   | 1.14  | 2.09                  | 0.10  | 0.62230               | 0.93343 | -0.19  | -0.39 | 0.04                       | -0.25 | -0.05   | -0.30 | -0.05                 |   |                       |   |   |   |   |   |
| HLICpos_325.2213_0.49  | HLIC | pos        | 0.49            | 325.2213   |            |      | 4        |         | 0.86711                                 | 0.95028 | -0.07  | 0.19  | 0.47   | -0.04 | 0.28                  | -0.25 | 0.76937               | 0.96544 | 0.09   | -0.01 | 0.43                       | 0.16  | 0.01    | -0.22 | 0.31                  |   |                       |   |   |   |   |   |
| RPneg_325.23767_10.917 | RP   | neg        | 10.917          | 325.2377   |            |      | 4        |         | 0.00062                                 | 0.04767 | 1.61   | -0.11 | 0.70   | 1.27  | 2.63                  | 0.01  | 0.39435               | 0.85426 | -0.24  | -0.32 | 0.14                       | -0.39 | -0.21   | -0.34 | -0.09                 |   |                       |   |   |   |   |   |
| RPneg_325.27524_10.982 | RP   | neg        | 10.982          | 325.2752   |            |      | 4        |         | 0.53187                                 | 0.79438 | -0.02  | 0.29  | 0.12   | -0.02 | 0.08                  | 0.17  | 0.34295               | 0.82748 | 0.66   | 0.46  | 0.59                       | 0.63  | 1.12    | 0.43  | 0.53                  |   |                       |   |   |   |   |   |
| HLICneg_325.6635_1.45  | HLIC | neg        | 1.45            | 325.6635   |            |      | 4        |         | 0.21060                                 | 0.55369 | -0.28  | 0.13  | -0.12  | -0.15 | 0.07                  | 0.11  | 0.00624               | 0.16689 | -0.48  | -0.42 | -0.63                      | -0.70 | -0.05   | -0.57 | -0.08                 |   |                       |   |   |   |   |   |
| RPneg_325.99738_1.196  | RP   | neg        | 1.196           | 325.9974   |            |      | 4        |         | 0.51596                                 | 0.78593 | 0.15   | -0.08 | 1.15   | 0.59  | 0.01                  | -0.63 | 0.08542               | 0.54164 | 0.49   | 0.24  | 0.67                       | 0.92  | 0.68    | 0.34  | -0.71                 |   |                       |   |   |   |   |   |
| HLICpos_326.0204_7.14  | HLIC | pos        | 7.14            | 326.0204   |            |      | 4        |         | 0.62725                                 | 0.84223 | -0.12  | -0.04 | 0.42   | 0.07  | -0.03                 | -0.12 | 0.35869               | 0.83442 | 0.03   | -0.08 | 0.02                       | 0.04  | 0.48    | -0.28 | -0.05                 |   |                       |   |   |   |   |   |
| HLICneg_326.0365_0.95  | HLIC | neg        | 0.95            | 326.0365   |            |      | 4        |         | 0.01830                                 | 0.24669 | -0.41  | -0.20 | -0.16  | -0.30 | -0.23                 | -0.21 | 0.01915               | 0.29304 | -0.45  | -0.47 | -0.33                      | -0.39 | -0.33   | -0.47 | -0.42                 |   |                       |   |   |   |   |   |
| HLICneg_326.0367_5.97  | HLIC | neg        | 5.97            | 326.0367   |            |      | 4        |         | 0.20822                                 | 0.55125 | -0.    |       |        |       |                       |       |                       |         |        |       |                            |       |         |       |                       |   |                       |   |   |   |   |   |



| Feature_ID             | Mode  | Ionization | Average_Rt.min. | Average_Mz | Metabolite           | MSMS | ID_Level | HMDB_ID  | IV-Alcohol self-administration (IV-ASA) |         |       |        |       |       |                       |       |         |                       |       |       | IV-Alcohol clamp (IV-AC)   |       |       |                       |       |   |                       |   |   |                       |   |   |
|------------------------|-------|------------|-----------------|------------|----------------------|------|----------|----------|-----------------------------------------|---------|-------|--------|-------|-------|-----------------------|-------|---------|-----------------------|-------|-------|----------------------------|-------|-------|-----------------------|-------|---|-----------------------|---|---|-----------------------|---|---|
|                        |       |            |                 |            |                      |      |          |          | Area Under the Curve (AUC)              |         |       |        |       |       | IV-Ghrelin or Placebo |       |         |                       |       |       | Area Under the Curve (AUC) |       |       |                       |       |   | IV-Ghrelin or Placebo |   |   |                       |   |   |
|                        |       |            |                 |            |                      |      |          |          | Baseline                                |         |       | IV-ASA |       |       | Baseline              |       |         | IV-Ghrelin or Placebo |       |       | Baseline                   |       |       | IV-Ghrelin or Placebo |       |   | Baseline              |   |   | IV-Ghrelin or Placebo |   |   |
|                        |       |            |                 |            |                      |      |          |          | p                                       | q       | d     | d      | d     | d     | d                     | d     | d       | p                     | q     | d     | d                          | d     | d     | p                     | q     | d | d                     | d | d | p                     | q | d |
| HILICpos_330.2633_0.65 | HILIC | pos        | 0.65            | 330.2633   |                      |      | 4        | 330.2633 | 0.90280                                 | 0.96414 | 0.21  | 0.20   | 0.46  | 0.28  | 0.22                  | 0.05  | 0.60818 | 0.92975               | -0.25 | 0.11  | -0.15                      | -0.31 | -0.14 | -0.12                 | -0.40 |   |                       |   |   |                       |   |   |
| RPpos_330.2639_9.11    | RP    | pos        | 9.11            | 330.2639   |                      |      | 4        | 330.2639 | 0.34237                                 | 0.66415 | -0.31 | 0.22   | 0.41  | 0.13  | -0.05                 | 0.94  | 0.37549 | 0.84416               | 0.00  | 0.88  | 0.42                       | -0.16 | -0.26 | -0.03                 | -0.20 |   |                       |   |   |                       |   |   |
| RPpos_330.2642_7.59    | RP    | pos        | 7.59            | 330.2642   |                      |      | 4        | 330.2642 | 0.67137                                 | 0.86314 | 0.10  | 0.20   | 0.31  | 0.13  | 0.16                  | -0.07 | 0.49437 | 0.89939               | -0.27 | 0.15  | -0.25                      | -0.16 | -0.39 | -0.14                 | -0.28 |   |                       |   |   |                       |   |   |
| RPpos_330.3363_9.92    | RP    | pos        | 9.92            | 330.3363   |                      |      | 4        | 330.3363 | 0.78726                                 | 0.91650 | -0.08 | -0.07  | 0.54  | -0.02 | 0.17                  | -0.09 | 0.21620 | 0.73241               | 0.52  | 0.83  | 0.58                       | 0.17  | 0.63  | 0.36                  | -0.27 |   |                       |   |   |                       |   |   |
| HILICpos_330.6804_4.08 | HILIC | pos        | 4.08            | 330.6804   |                      |      | 4        | 330.6804 | 0.40037                                 | 0.73057 | 0.14  | -0.08  | 0.58  | 0.09  | 0.09                  | 0.09  | 0.09307 | 0.11511               | 0.58  | 0.65  | 0.66                       | 0.09  | 0.26  | 0.03                  | -0.15 |   |                       |   |   |                       |   |   |
| HILICneg_330.8515_7.73 | HILIC | neg        | 7.73            | 330.8515   |                      |      | 4        | 330.8515 | 0.54529                                 | 0.80959 | -0.23 | 0.25   | 0.43  | 0.16  | 0.11                  | 0.28  | 0.06130 | 0.43443               | -0.44 | -0.30 | -0.43                      | 0.28  | -0.45 | -0.60                 | -0.38 |   |                       |   |   |                       |   |   |
| HILICneg_330.8857_1.45 | HILIC | neg        | 1.45            | 330.8857   |                      |      | 4        | 330.8857 | 0.90769                                 | 0.96591 | 0.00  | 0.10   | 0.02  | -0.03 | 0.15                  | 0.30  | 0.03353 | 0.37633               | -0.33 | -0.35 | -0.35                      | -0.37 | -0.34 | -0.27                 | -0.14 |   |                       |   |   |                       |   |   |
| HILICneg_330.9189_3.32 | HILIC | neg        | 3.32            | 330.9189   |                      |      | 4        | 330.9189 | 0.36814                                 | 0.68468 | -0.27 | -0.60  | 0.13  | 0.42  | -0.01                 | 0.27  | 0.19330 | 0.70820               | 0.20  | -0.04 | 0.24                       | -0.03 | 0.01  | 0.64                  | 0.27  |   |                       |   |   |                       |   |   |
| RPneg_330.95169_2.386  | RP    | neg        | 2.386           | 330.9517   |                      |      | 4        | 330.9517 | 0.22712                                 | 0.56895 | -0.05 | 0.35   | 0.78  | 0.07  | -0.40                 | -0.64 | 0.67838 | 0.94718               | -0.12 | -0.12 | -0.09                      | -0.03 | -0.01 | -0.11                 | -0.48 |   |                       |   |   |                       |   |   |
| RPneg_330.95236_2.811  | RP    | neg        | 2.811           | 330.9524   |                      |      | 4        | 330.9524 | 0.11019                                 | 0.44451 | -0.35 | -0.16  | 0.52  | -0.05 | -0.90                 | -0.44 | 0.60089 | 0.92810               | 0.01  | -0.10 | 0.01                       | 0.21  | 0.20  | -0.09                 | -0.37 |   |                       |   |   |                       |   |   |
| RPneg_331.0611_3.004   | RP    | neg        | 3.004           | 331.0611   |                      |      | 4        | 331.0611 | 0.36408                                 | 0.68205 | 0.17  | 0.20   | 0.84  | 0.23  | -0.04                 | 0.90  | 0.28279 | 0.79142               | 0.06  | 0.12  | 0.01                       | 0.12  | 0.04  | 0.18                  | -0.21 |   |                       |   |   |                       |   |   |
| HILICneg_331.0613_0.66 | HILIC | neg        | 0.66            | 331.0613   |                      |      | 4        | 331.0613 | 0.40065                                 | 0.70892 | 0.14  | 0.13   | 0.66  | 0.37  | -0.14                 | 1.02  | 0.26546 | 0.77769               | 0.07  | 0.03  | 0.09                       | 0.02  | 0.03  | 0.29                  | -0.14 |   |                       |   |   |                       |   |   |
| HILICneg_331.0633_6.17 | HILIC | neg        | 6.17            | 331.0633   |                      |      | 4        | 331.0633 | 0.90197                                 | 0.96375 | -0.07 | 0.01   | 0.45  | 0.07  | 0.31                  | 0.11  | 0.04427 | 0.42220               | 0.27  | 0.37  | 0.45                       | 0.48  | 0.45  | 0.19                  | -0.23 |   |                       |   |   |                       |   |   |
| RPneg_331.09094_3.576  | RP    | neg        | 3.576           | 331.0909   |                      |      | 4        | 331.0909 | 0.01208                                 | 0.21004 | 0.52  | 0.27   | 0.64  | 0.57  | 0.56                  | 1.05  | 0.91045 | 0.98698               | 0.06  | -0.05 | 0.00                       | -0.13 | 0.26  | 0.24                  | 0.53  |   |                       |   |   |                       |   |   |
| HILICneg_331.0916_1.99 | HILIC | neg        | 1.99            | 331.0916   |                      |      | 4        | 331.0916 | 0.00697                                 | 0.16467 | 0.54  | 0.48   | 0.64  | 0.56  | 0.53                  | 0.95  | 0.83887 | 0.97596               | 0.11  | -0.01 | -0.03                      | 0.03  | 0.23  | 0.15                  | 0.55  |   |                       |   |   |                       |   |   |
| RPneg_331.1221_4.703   | RP    | neg        | 4.703           | 331.1221   |                      |      | 4        | 331.1221 | 0.00102                                 | 0.06451 | 0.46  | 0.23   | 0.65  | 0.76  | 0.46                  | -0.59 | 0.36475 | 0.83786               | 0.20  | -0.08 | 0.14                       | 0.16  | 0.36  | 0.35                  | -0.03 |   |                       |   |   |                       |   |   |
| RPneg_331.12958_6.726  | RP    | neg        | 6.726           | 331.1296   |                      |      | 4        | 331.1296 | 0.36015                                 | 0.67868 | 0.46  | 0.61   | 0.70  | 0.26  | 0.90                  | -0.01 | 0.14748 | 0.65072               | 0.90  | 0.77  | 1.02                       | 1.23  | 0.53  | 0.90                  | 0.02  |   |                       |   |   |                       |   |   |
| RPneg_331.12958_6.726  | RP    | neg        | 6.726           | 331.1296   |                      |      | 4        | 331.1296 | 0.19406                                 | 0.53956 | 0.54  | 0.52   | 0.95  | 0.47  | 0.93                  | -0.05 | 0.12460 | 0.61515               | 0.87  | 1.27  | 0.94                       | 0.72  | 0.98  | 0.72                  | 0.33  |   |                       |   |   |                       |   |   |
| RPneg_331.12964_6.564  | RP    | neg        | 6.564           | 331.1296   |                      |      | 4        | 331.1296 | 0.31330                                 | 0.64125 | 0.44  | 0.71   | 0.70  | 0.21  | 0.69                  | -0.06 | 0.16156 | 0.67138               | 0.86  | 0.66  | 0.97                       | 1.35  | 0.35  | 0.72                  | 0.17  |   |                       |   |   |                       |   |   |
| RPneg_331.12967_6.051  | RP    | neg        | 6.051           | 331.1297   |                      |      | 4        | 331.1297 | 0.09104                                 | 0.41995 | 0.60  | 0.74   | 0.78  | 0.42  | 1.16                  | 0.22  | 0.23599 | 0.63399               | 1.10  | 0.99  | 1.07                       | 1.57  | 0.96  | 0.53                  | -0.10 |   |                       |   |   |                       |   |   |
| HILICneg_331.1302_0.56 | HILIC | neg        | 0.56            | 331.1302   |                      |      | 4        | 331.1302 | 0.66125                                 | 0.85799 | 0.23  | 0.47   | 0.29  | 0.08  | 0.58                  | -0.09 | 0.10336 | 0.57839               | 0.89  | 1.30  | 0.82                       | 1.02  | 0.45  | 0.81                  | 0.14  |   |                       |   |   |                       |   |   |
| RPpos_331.1659_11.73   | RP    | pos        | 11.73           | 331.1659   |                      |      | 4        | 331.1659 | 0.59424                                 | 0.82615 | 0.36  | 0.63   | 0.23  | 0.32  | 0.64                  | -0.36 | 0.15198 | 0.65756               | 0.65  | 1.09  | 0.57                       | 0.84  | 0.43  | 0.45                  | -0.01 |   |                       |   |   |                       |   |   |
| RPneg_331.17651_7.99   | RP    | neg        | 7.99            | 331.1765   |                      |      | 4        | 331.1765 | 0.12547                                 | 0.46128 | 2.60  | 0.29   | 1.50  | 3.79  | 6.70                  | 0.28  | 0.33769 | 0.82456               | 1.32  | 0.59  | 0.93                       | 1.76  | 1.99  | 1.43                  | 0.33  |   |                       |   |   |                       |   |   |
| RPneg_331.1767_8.258   | RP    | neg        | 8.258           | 331.1767   |                      |      | 4        | 331.1767 | 0.43184                                 | 0.73136 | 0.36  | 0.29   | 0.87  | 0.40  | 0.49                  | -0.37 | 0.27617 | 0.78625               | 0.18  | 0.07  | 0.13                       | 0.25  | 0.10  | 0.24                  | 0.35  |   |                       |   |   |                       |   |   |
| RPneg_331.19107_6.902  | RP    | neg        | 6.902           | 331.1911   | fragment of cortisol |      | 4        | 331.1911 | 1.05E-07                                | 0.00030 | 2.82  | 0.17   | 3.48  | 2.42  | 5.03                  | -0.48 | 0.00000 | 0.00000               | 3.11  | -0.12 | -2.85                      | 3.41  | 3.46  | 3.03                  | -0.26 |   |                       |   |   |                       |   |   |
| RPpos_331.2119_10.16   | RP    | pos        | 10.16           | 331.2119   |                      |      | 4        | 331.2119 | 0.65204                                 | 0.85341 | 0.19  | 0.57   | 0.62  | 0.03  | 0.43                  | -0.03 | 0.25184 | 0.76793               | -0.55 | -0.28 | 0.07                       | -0.47 | -0.19 | -0.85                 | 0.08  |   |                       |   |   |                       |   |   |
| RPpos_331.2165_10.62   | RP    | pos        | 10.62           | 331.2165   |                      |      | 4        | 331.2165 | 0.55670                                 | 0.80760 | 0.21  | -0.12  | 0.30  | 1.41  | 2.05                  | 0.04  | 0.77601 | 0.96495               | 0.00  | 0.08  | 0.17                       | -0.21 | -0.01 | -0.10                 | 0.23  |   |                       |   |   |                       |   |   |
| RPpos_331.2263_6.91    | RP    | pos        | 6.91            | 331.2263   |                      |      | 4        | 331.2263 | 0.16110                                 | 0.50461 | 0.48  | -0.03  | 0.23  | 0.50  | 1.01                  | 1.23  | 0.01243 | 0.23873               | 0.44  | -0.43 | 0.02                       | 0.25  | 0.81  | 0.67                  | 0.97  |   |                       |   |   |                       |   |   |
| RPpos_331.2277_6.81    | RP    | pos        | 6.81            | 331.2277   |                      |      | 4        | 331.2277 | 0.04811                                 | 0.34199 | 0.36  | -0.15  | 0.39  | 0.35  | 0.57                  | 0.89  | 0.40091 | 0.85821               | 0.27  | -0.06 | -0.20                      | 0.10  | 0.05  | 0.73                  | 0.53  |   |                       |   |   |                       |   |   |
| HILICpos_331.2385_0.86 | HILIC | pos        | 0.86            | 331.2385   |                      |      | 4        | 331.2385 | 0.12707                                 | 0.46383 | -0.39 | -0.32  | 0.14  | -0.16 | -0.33                 | -0.51 | 0.03059 | 0.36569               | 0.74  | 0.35  | 0.99                       | 1.42  | 0.72  | 0.92                  | -0.09 |   |                       |   |   |                       |   |   |
| RPneg_331.24973_7.895  | RP    | neg        | 7.895           | 331.2497   |                      |      | 4        | 331.2497 | 0.00539                                 | 0.14495 | 0.58  | 0.16   | 0.89  | 0.54  | 0.75                  | -0.69 | 0.02074 | 0.30448               | 0.88  | -0.21 | 0.03                       | 1.42  | 0.99  | 1.25                  | -0.20 |   |                       |   |   |                       |   |   |
| RPpos_331.2849_10.78   | RP    | pos        | 10.78           | 331.2849   |                      |      | 4        | 331.2849 | 0.81700                                 | 0.93043 | -0.06 | 0.24   | 0.39  | 1.02  | 0.72                  | -0.29 | 0.07373 | 0.51652               | 0.12  | -0.01 | 0.12                       | 0.17  | 0.23  | 0.50                  | -0.06 |   |                       |   |   |                       |   |   |
| RPpos_331.6564_5.53    | RP    | pos        | 5.53            | 331.6564   |                      |      | 4        | 331.6564 | 0.23258                                 | 0.57388 | 0.47  | 0.47   | 0.50  | 0.54  | 0.47                  | -0.08 | 0.15117 | 0.93043               | -0.12 | -0.20 | -0.10                      | 0.00  | -0.08 | -0.16                 | -0.20 |   |                       |   |   |                       |   |   |
| HILICneg_331.6557_1.45 | HILIC | neg        | 1.45            | 331.6557   |                      |      | 4        | 331.6557 | 0.29475                                 | 0.62645 | -0.24 | 0.06   | -0.06 | -0.06 | 0.08                  | 0.14  | 0.00945 | 0.20695               | -0.39 | -0.48 | -0.41                      | -0.58 | -0.28 | -0.31                 | -0.05 |   |                       |   |   |                       |   |   |
| RPpos_331.7106_7.28    | RP    | pos        | 7.28            | 331.7106   |                      |      | 4        | 331.7106 | 0.40878                                 | 0.71460 | -0.25 | -0.21  | 1.00  | -0.10 | -0.42                 | 0.46  | 0.21697 | 0.73336               | -0.40 | -0.22 | -0.16                      | -0.31 | -0.21 | -0.41                 | -0.50 |   |                       |   |   |                       |   |   |
| RPneg_331.84641_7.431  | RP    | neg        | 7.431           | 331.8464   |                      |      | 4        | 331.8464 | 0.25600                                 | 0.59409 | -0.33 | -0.80  | -0.06 | -0.37 | 0.61                  | 0.46  | 0.45317 | 0.88314               | -0.30 | -0.25 | -0.21                      | 0.26  | -0.30 | -0.01                 | -0.75 |   |                       |   |   |                       |   |   |
| RPpos_331.9894_2.64    | RP    | pos        | 2.64            | 331.9894   |                      |      | 4        | 331.9894 | 0.00926                                 | 0.18803 | 0.38  | 0.34   | 0.85  | 0.38  | 0.28                  | 0.43  | 0.97132 | 0.99673               | -0.01 | -0.02 | -0.04                      | -0.11 | 0.00  | 0.05                  | 0.27  |   |                       |   |   |                       |   |   |
| RPneg_331.98959_3.454  | RP    | neg        | 3.454           | 331.9896   |                      |      | 4        | 331.9896 | 0.00022                                 | 0.02875 | 0.45  | 0.21   | 0.88  | 0.47  | 0.42                  | 0.10  | 0.90103 | 0.98560               | 0.15  | -0.40 | 0.18                       | 0.10  | 0.34  | 0.66                  | -0.31 |   |                       |   |   |                       |   |   |
| HILICneg_332.0148_5.17 | HILIC | neg        | 5.17            | 332.0148   |                      |      | 4        | 332.0148 | 0.86206                                 | 0.94834 | 0.06  | 0.09   | 0.82  | 0.69  | 0.03                  | -0.40 | 0.07749 | 0.52450               | 0.55  | 0.17  | 1.18                       | 1.13  | 0.49  | 0.46                  | 0.15  |   |                       |   |   |                       |   |   |
| HILICneg_332.0327_7.12 | HILIC | neg        | 7.12            | 332.0327   |                      |      | 4        | 332.0327 | 0.69665                                 | 0.87585 | 0.10  | 0.35   | 0.51  | 0.06  | -0.13                 | -0.45 | 0.00960 | 0.20893               | 0.55  | 0.80  | 0.71                       | 1.23  | 0.15  | 0.10                  | -0.45 |   |                       |   |   |                       |   |   |
| HILICneg_332.0753_3.03 | HILIC | neg        | 3.03            | 332.0753   |                      |      | 4        | 332.0753 | 0.38881                                 | 0.70077 | 0.20  | 0.37   | 0.06  | 0.46  | 0.30                  | 0.49  | 0.53451 | 0.91332               | 0.25  | -0.34 | -0.26                      | 0.86  | 0.17  | 0.47                  | -0.10 |   |                       |   |   |                       |   |   |
| HILICpos_332.0967_2.47 | HILIC | pos        | 2.47            | 332.0967   |                      |      | 4        | 332.0967 | 0.05937                                 | 0.36509 | -0.40 | -0.15  | -0.22 | -0.30 | -0.43                 | 0.37  | 0.64825 | 0.93906               | -0.30 | -0.07 | 0.12                       | -0.59 | -0.49 | -0.47                 | 0.35  |   |                       |   |   |                       |   |   |
| HILICneg_332.09        |       |            |                 |            |                      |      |          |          |                                         |         |       |        |       |       |                       |       |         |                       |       |       |                            |       |       |                       |       |   |                       |   |   |                       |   |   |

| Feature_ID             | Mode  | Ionization | Average_Rt.min. | Average_Mz | Metabolite | MSMS | ID_Level | HMDB_ID  | IV-Alcohol self-administration (IV-ASA) |         |       |        |       |       |                       |       |         |         |       | IV-Alcohol clamp (IV-AC)   |       |       |         |       |                       |   |   |         |         |         |         |   |   |   |   |
|------------------------|-------|------------|-----------------|------------|------------|------|----------|----------|-----------------------------------------|---------|-------|--------|-------|-------|-----------------------|-------|---------|---------|-------|----------------------------|-------|-------|---------|-------|-----------------------|---|---|---------|---------|---------|---------|---|---|---|---|
|                        |       |            |                 |            |            |      |          |          | Area Under the Curve (AUC)              |         |       |        |       |       | IV-Ghrelin or Placebo |       |         |         |       | Area Under the Curve (AUC) |       |       |         |       | IV-Ghrelin or Placebo |   |   |         |         | Post-AC | IV-AC   |   |   |   |   |
|                        |       |            |                 |            |            |      |          |          | Baseline                                |         |       | IV-ASA |       |       | Ghrelin               |       | Placebo |         |       | Baseline                   |       |       | Ghrelin |       | Placebo               |   |   | Post-AC | Ghrelin |         | Placebo |   |   |   |   |
|                        |       |            |                 |            |            |      |          |          | p                                       | q       | d     | p      | q     | d     | d                     | d     | d       | d       | d     | d                          | p     | q     | d       | p     | q                     | d | d | d       | d       | d       | d       | d | d | d | d |
| HILICneg_333.8001_4.28 | HILIC | neg        | 4.28            | 333.8001   |            |      | 4        | 333.8001 | 0.63002                                 | 0.84355 | -0.22 | 0.07   | -0.33 | 0.27  | -0.04                 | -0.12 | 0.99278 | 0.99904 | 0.04  | -0.20                      | -0.11 | 0.09  | -0.03   | 0.35  | 0.13                  |   |   |         |         |         |         |   |   |   |   |
| HILICneg_333.8002_0.38 | HILIC | neg        | 0.38            | 333.8002   |            |      | 4        | 333.8002 | 0.09374                                 | 0.42301 | -0.28 | -0.10  | -0.18 | -0.03 | -0.33                 | -0.28 | 0.45395 | 0.88356 | -0.25 | -0.09                      | -0.19 | -0.02 | -0.25   | -0.12 | -0.66                 |   |   |         |         |         |         |   |   |   |   |
| RPneg_334.00537_1.197  | RP    | neg        | 1.197           | 334.0054   |            |      | 4        | 334.0054 | 0.47780                                 | 0.76271 | 0.19  | 0.59   | 1.09  | 0.46  | 0.03                  | -0.58 | 0.02630 | 0.34210 | 0.65  | 0.27                       | 0.90  | 1.40  | 1.12    | 0.42  | -0.30                 |   |   |         |         |         |         |   |   |   |   |
| HILICneg_334.0247_5.62 | HILIC | neg        | 5.62            | 334.0247   |            |      | 4        | 334.0247 | 0.10915                                 | 0.44278 | -0.52 | -0.36  | 0.03  | -0.34 | -0.40                 | 0.04  | 0.35772 | 0.83442 | -0.13 | -0.43                      | -0.06 | 0.46  | -0.37   | -0.12 | -0.51                 |   |   |         |         |         |         |   |   |   |   |
| RPneg_334.0248_4.734   | RP    | neg        | 4.734           | 334.0248   |            |      | 4        | 334.0248 | 0.63138                                 | 0.84391 | 0.08  | 0.21   | 0.44  | 0.36  | 0.27                  | 0.00  | 0.37195 | 0.51214 | -0.10 | -0.08                      | -0.17 | -0.15 | 0.06    | -0.13 | -0.02                 |   |   |         |         |         |         |   |   |   |   |
| HILICneg_334.0821_5.41 | HILIC | neg        | 5.41            | 334.0821   |            |      | 4        | 334.0821 | 0.02817                                 | 0.28685 | -0.47 | -0.20  | -0.27 | -0.31 | -0.53                 | 0.31  | 0.57171 | 0.97190 | -0.38 | -0.08                      | -0.16 | 0.37  | -0.04   | -0.07 | -0.01                 |   |   |         |         |         |         |   |   |   |   |
| HILICneg_334.12_2.33   | HILIC | neg        | 2.33            | 334.1200   |            |      | 4        | 334.1200 | 0.98634                                 | 0.99495 | 0.05  | 0.33   | 0.07  | 0.04  | 0.16                  | 0.01  | 0.20320 | 0.71938 | -0.01 | -0.04                      | -0.02 | 0.01  | -0.09   | 0.16  | -0.07                 |   |   |         |         |         |         |   |   |   |   |
| RPpos_334.1438_8.51    | RP    | pos        | 8.51            | 334.1438   |            |      | 4        | 334.1438 | 0.04778                                 | 0.34122 | -0.37 | -0.24  | -0.14 | -0.07 | -0.61                 | 0.08  | 0.23884 | 0.75656 | -0.33 | -0.55                      | -0.20 | -0.51 | -0.56   | 0.02  | -0.26                 |   |   |         |         |         |         |   |   |   |   |
| RPpos_334.1589_10.9    | RP    | pos        | 10.9            | 334.1589   |            |      | 4        | 334.1589 | 0.00246                                 | 0.10246 | 0.97  | 0.02   | 0.69  | 0.85  | 1.73                  | 0.08  | 0.98983 | 0.99963 | -0.08 | -0.37                      | 0.21  | -0.22 | -0.09   | -0.02 | -0.02                 |   |   |         |         |         |         |   |   |   |   |
| RPpos_334.2332_6.98    | RP    | pos        | 6.98            | 334.2332   |            |      | 4        | 334.2332 | 0.42248                                 | 0.72469 | -0.27 | -0.03  | 0.84  | -0.25 | -0.19                 | 0.62  | 0.62163 | 0.93338 | -0.20 | -0.26                      | -0.17 | -0.08 | 0.24    | -0.48 | -0.08                 |   |   |         |         |         |         |   |   |   |   |
| RPpos_334.3086_11.52   | RP    | pos        | 11.52           | 334.3086   |            |      | 4        | 334.3086 | 0.98870                                 | 0.99589 | 0.01  | 0.21   | 0.04  | 0.18  | 0.35                  | -0.80 | 0.53594 | 0.91400 | 0.38  | 2.09                       | -0.35 | 0.33  | -0.39   | 0.39  | 0.43                  |   |   |         |         |         |         |   |   |   |   |
| RPpos_334.3109_11.08   | RP    | pos        | 11.08           | 334.3109   |            |      | 4        | 334.3109 | 0.62321                                 | 0.84007 | 0.18  | 0.59   | 0.16  | 0.24  | 0.29                  | -0.66 | 0.25647 | 0.77190 | -0.08 | 0.39                       | 0.01  | 0.04  | -0.51   | -0.02 | 0.02                  |   |   |         |         |         |         |   |   |   |   |
| HILICneg_334.6939_3.19 | HILIC | neg        | 3.19            | 334.6939   |            |      | 4        | 334.6939 | 0.53053                                 | 0.79360 | -0.22 | 0.12   | 0.28  | -0.14 | -0.19                 | 1.37  | 0.27742 | 0.78661 | -0.25 | -0.01                      | -0.39 | 0.13  | -0.04   | -0.34 | -0.56                 |   |   |         |         |         |         |   |   |   |   |
| HILICneg_334.881_1.45  | HILIC | neg        | 1.45            | 334.8810   |            |      | 4        | 334.8810 | 0.75371                                 | 0.90229 | -0.09 | -0.15  | -0.01 | -0.25 | 0.22                  | 0.25  | 0.10708 | 0.58520 | -0.32 | -0.25                      | -0.38 | -0.38 | -0.29   | -0.18 | -0.26                 |   |   |         |         |         |         |   |   |   |   |
| HILICneg_334.966_6.29  | HILIC | neg        | 6.29            | 334.9660   |            |      | 4        | 334.9660 | 0.87355                                 | 0.95270 | 0.06  | 0.00   | 0.60  | 0.47  | 0.08                  | -0.08 | 0.31842 | 0.81449 | 0.26  | 0.93                       | 0.09  | 0.20  | 0.06    | 0.29  | -0.04                 |   |   |         |         |         |         |   |   |   |   |
| HILICneg_335.0497_4.89 | HILIC | neg        | 4.89            | 335.0497   |            |      | 4        | 335.0497 | 0.50572                                 | 0.77954 | 0.18  | 0.56   | 0.50  | 0.07  | 0.23                  | 0.38  | 0.01902 | 0.29279 | -0.34 | -0.02                      | -0.56 | -0.06 | 0.00    | -0.66 | -0.57                 |   |   |         |         |         |         |   |   |   |   |
| HILICneg_335.06_1.39   | HILIC | neg        | 1.39            | 335.0600   |            |      | 4        | 335.0600 | 0.25833                                 | 0.59633 | -0.07 | -0.53  | 0.27  | -0.19 | 0.21                  | 0.74  | 0.01583 | 0.26962 | 0.48  | -0.15                      | 0.35  | 0.19  | 0.83    | 0.16  | 1.01                  |   |   |         |         |         |         |   |   |   |   |
| RPneg_335.0652_1.68    | RP    | neg        | 1.68            | 335.0605   |            |      | 4        | 335.0605 | 0.02880                                 | 0.28894 | -0.45 | -0.18  | -0.26 | -0.32 | -0.58                 | 0.39  | 0.54713 | 0.91662 | -0.41 | -0.07                      | 0.29  | -0.73 | -0.56   | -0.62 | 0.32                  |   |   |         |         |         |         |   |   |   |   |
| HILICneg_335.0614_2.57 | HILIC | neg        | 2.57            | 335.0614   |            |      | 4        | 335.0614 | 0.02817                                 | 0.28685 | -0.47 | -0.20  | -0.27 | -0.31 | -0.53                 | 0.31  | 0.57171 | 0.97190 | -0.38 | -0.08                      | -0.16 | 0.37  | -0.04   | -0.07 | -0.01                 |   |   |         |         |         |         |   |   |   |   |
| HILICneg_335.1093_1.91 | HILIC | neg        | 1.91            | 335.1093   |            |      | 4        | 335.1093 | 0.23031                                 | 0.64681 | 0.27  | 0.06   | 0.50  | 0.40  | 0.76                  | 0.02  | 0.89918 | 0.98550 | 0.02  | 0.02                       | 0.01  | 0.02  | 0.10    | 0.07  | -0.16                 |   |   |         |         |         |         |   |   |   |   |
| RPneg_335.11102_8.767  | RP    | neg        | 8.767           | 335.1110   |            |      | 4        | 335.1110 | 0.29528                                 | 0.62685 | -0.16 | -0.11  | -0.14 | -0.17 | 0.11                  | -0.06 | 0.23457 | 0.75220 | 0.14  | 0.13                       | 0.08  | 0.17  | 0.13    | 0.07  | 0.32                  |   |   |         |         |         |         |   |   |   |   |
| HILICneg_335.1155_2.33 | HILIC | neg        | 2.33            | 335.1155   |            |      | 4        | 335.1155 | 0.86342                                 | 0.94900 | 0.06  | 0.13   | 0.10  | 0.22  | 0.22                  | -0.01 | 0.55121 | 0.91756 | -0.05 | -0.15                      | -0.06 | 0.04  | -0.04   | -0.05 | -0.08                 |   |   |         |         |         |         |   |   |   |   |
| RPpos_335.1251_9.38    | RP    | pos        | 9.38            | 335.1251   |            |      | 4        | 335.1251 | 0.12325                                 | 0.45906 | -0.55 | -0.44  | -0.41 | -0.43 | 0.04                  | 0.46  | 0.78337 | 0.96604 | -0.10 | 0.30                       | -0.57 | -0.06 | -0.22   | -0.21 | 0.12                  |   |   |         |         |         |         |   |   |   |   |
| RPpos_335.1523_10.65   | RP    | pos        | 10.65           | 335.1523   |            |      | 4        | 335.1523 | 0.00034                                 | 0.03404 | 1.35  | -0.10  | 0.67  | 0.89  | 2.47                  | 0.07  | 0.98883 | 0.99810 | -0.05 | 0.01                       | 0.34  | -0.17 | -0.08   | -0.16 | -0.09                 |   |   |         |         |         |         |   |   |   |   |
| RPpos_335.1665_10.9    | RP    | pos        | 10.9            | 335.1665   |            |      | 4        | 335.1665 | 0.00527                                 | 0.14330 | 0.94  | -0.13  | 0.54  | 0.87  | 1.87                  | -0.05 | 0.69406 | 0.95008 | -0.13 | -0.45                      | 0.29  | -0.33 | -0.08   | -0.11 | -0.11                 |   |   |         |         |         |         |   |   |   |   |
| RPpos_335.2192_10.63   | RP    | pos        | 10.63           | 335.2192   |            |      | 4        | 335.2192 | 0.32552                                 | 0.67219 | 0.27  | 0.72   | 0.60  | 0.41  | 0.51                  | -0.02 | 0.65501 | 0.94016 | -0.17 | -0.03                      | 0.19  | -0.30 | -0.13   | -0.89 | 0.23                  |   |   |         |         |         |         |   |   |   |   |
| RPneg_335.22238_8.703  | RP    | neg        | 8.703           | 335.2224   |            |      | 4        | 335.2224 | 0.94421                                 | 0.97946 | -0.01 | -0.01  | 0.07  | -0.02 | 0.04                  | 0.48  | 0.41753 | 0.86646 | 0.14  | -0.24                      | -0.06 | 0.07  | 0.47    | 0.10  | 0.15                  |   |   |         |         |         |         |   |   |   |   |
| RPpos_335.2226_5.55    | RP    | pos        | 5.55            | 335.2226   |            |      | 4        | 335.2226 | 0.27488                                 | 0.61013 | -0.30 | 0.01   | 0.60  | -0.35 | -0.33                 | 0.25  | 0.00245 | 0.09786 | -0.43 | -0.30                      | -0.26 | -0.45 | -0.21   | -0.14 | -0.45                 |   |   |         |         |         |         |   |   |   |   |
| RPneg_335.23639_10.209 | RP    | neg        | 10.209          | 335.2364   |            |      | 4        | 335.2364 | 0.65973                                 | 0.85748 | -0.12 | 0.07   | 0.29  | 0.30  | -0.30                 | 0.61  | 0.51267 | 0.90638 | -0.08 | -0.59                      | 0.76  | -0.59 | -0.01   | -0.04 | 0.19                  |   |   |         |         |         |         |   |   |   |   |
| RPpos_335.2428_10.9    | RP    | pos        | 10.9            | 335.2428   |            |      | 4        | 335.2428 | 0.00328                                 | 0.11843 | 1.03  | -0.09  | 0.60  | 1.02  | 1.87                  | 0.04  | 0.70072 | 0.95161 | -0.16 | -0.36                      | 0.30  | -0.31 | -0.12   | -0.28 | -0.05                 |   |   |         |         |         |         |   |   |   |   |
| RPneg_335.65024_7.268  | RP    | neg        | 7.268           | 335.6502   |            |      | 4        | 335.6502 | 0.27819                                 | 0.61290 | 0.14  | 0.35   | 0.31  | 0.00  | 0.23                  | 0.28  | 0.48763 | 0.89807 | -0.09 | -0.15                      | -0.12 | 0.10  | -0.18   | 0.02  | -0.11                 |   |   |         |         |         |         |   |   |   |   |
| HILICneg_335.6505_1.45 | HILIC | neg        | 1.45            | 335.6505   |            |      | 4        | 335.6505 | 0.24184                                 | 0.66388 | -0.22 | 0.06   | 0.00  | -0.04 | 0.15                  | -0.04 | 0.02836 | 0.33144 | -0.38 | -0.48                      | -0.45 | -0.37 | -0.22   | -0.44 | -0.04                 |   |   |         |         |         |         |   |   |   |   |
| RPpos_335.7033_7.07    | RP    | pos        | 7.07            | 335.7033   |            |      | 4        | 335.7033 | 0.60657                                 | 0.83215 | -0.11 | -0.29  | 0.55  | 0.08  | -0.21                 | 0.34  | 0.88747 | 0.98355 | -0.01 | 0.12                       | 0.16  | 0.07  | 0.10    | -0.70 | -0.19                 |   |   |         |         |         |         |   |   |   |   |
| RPpos_335.7034_6.67    | RP    | pos        | 6.67            | 335.7034   |            |      | 4        | 335.7034 | 0.90812                                 | 0.96600 | -0.04 | 0.16   | 0.39  | 0.30  | -0.08                 | 0.65  | 0.85425 | 0.97833 | -0.10 | -0.07                      | 0.01  | 0.19  | 0.28    | 1.15  | 0.02                  |   |   |         |         |         |         |   |   |   |   |
| HILICneg_335.796_4.88  | HILIC | neg        | 4.88            | 335.7960   |            |      | 4        | 335.7960 | 0.69694                                 | 0.87596 | -0.05 | 0.35   | 0.54  | -0.16 | 0.10                  | 1.00  | 0.15932 | 0.66816 | -0.32 | 0.08                       | -0.56 | -0.08 | -0.14   | -0.69 | -0.66                 |   |   |         |         |         |         |   |   |   |   |
| HILICneg_335.7963_4.28 | HILIC | neg        | 4.28            | 335.7963   |            |      | 4        | 335.7963 | 0.27025                                 | 0.60656 | -0.35 | -0.03  | -0.55 | -0.01 | 0.11                  | -0.09 | 0.60956 | 0.93017 | -0.09 | -0.10                      | -0.14 | -0.28 | -0.43   | 0.38  | 0.08                  |   |   |         |         |         |         |   |   |   |   |
| HILICneg_335.7964_0.55 | HILIC | neg        | 0.55            | 335.7964   |            |      | 4        | 335.7964 | 0.00618                                 | 0.15398 | -0.87 | -0.50  | -0.57 | 0.09  | -0.55                 | -0.59 | 0.64701 | 0.93869 | -0.03 | 0.29                       | 0.11  | -0.26 | -0.21   | -0.12 | 0.34                  |   |   |         |         |         |         |   |   |   |   |
| HILICneg_335.7967_4.12 | HILIC | neg        | 4.12            | 335.7967   |            |      | 4        | 335.7967 | 0.49245                                 | 0.77265 | -0.23 | 0.43   | -0.07 | 0.09  | -0.34                 | -0.64 | 0.54118 | 0.91464 | 0.16  | -0.06                      | 0.01  | 0.32  | 0.05    | 0.29  | 0.31                  |   |   |         |         |         |         |   |   |   |   |
| HILICneg_335.9512_5.41 | HILIC | neg        | 5.41            | 335.9512   |            |      | 4        | 335.9512 | 0.30734                                 | 0.63597 | -0.32 | 0.09   | -0.15 | -0.35 | 0.28                  | -0.01 | 0.54153 | 0.91464 | -0.02 | -0.16                      | -0.01 | 0.06  | -0.26   | 0.65  | -1.31                 |   |   |         |         |         |         |   |   |   |   |
| RPneg_336.07236_3.83   | RP    | neg        | 3.83            | 336.0724   |            |      | 4        | 336.0724 | 0.55623                                 | 0.80750 | 0.11  | -0.03  | 0.04  | 0.31  | 0.27                  | 1.14  | 0.35932 | 0.83448 | -0.15 | -0.23                      | -0.09 | -0.19 | -0.12   | -0.09 | -0.12                 |   |   |         |         |         |         |   |   |   |   |
| HILICneg_336.0912_3.95 | HILIC | neg        | 3.95            | 336.0912   |            |      | 4        | 336.0912 | 0.14042                                 | 0.48047 | -0.14 | -0.28  | 0.23  | 0.02  | 0.04                  | -0.47 | 0.76819 | 0.96428 | -0.02 | -0.43                      | 0.19  | 0.39  | 0.07    | -0.16 | -0.28                 |   |   |         |         |         |         |   |   |   |   |
| RPneg_336.16025_8.457  | RP    | neg        | 8.457           | 336.1603   |            |      | 4        | 336.1603 | 6.23E-06                                | 0.00409 | 0.81  | 0.07   | 1.51  | 0.99  | 1.29                  | 0.00  | 0.00053 | 0.03850 | 0.93  | -0.06                      | 0.33  | 0.24  | 1.68    | 1.21  | -0.17                 |   |   |         |         |         |         |   |   |   |   |





| Feature_ID             | Mode  | Ionization | Average_Rt.min. | Average_Mz | Metabolite | MSMS | ID_Level | HMDB_ID | IV-Alcohol self-administration (IV-ASA) |         |       |        |       |       |                       |       |         |          |       |       | IV-Alcohol clamp (IV-AC)   |       |       |       |       |      |                       |  |  |        |  |  |
|------------------------|-------|------------|-----------------|------------|------------|------|----------|---------|-----------------------------------------|---------|-------|--------|-------|-------|-----------------------|-------|---------|----------|-------|-------|----------------------------|-------|-------|-------|-------|------|-----------------------|--|--|--------|--|--|
|                        |       |            |                 |            |            |      |          |         | Area Under the Curve (AUC)              |         |       |        |       |       | IV-Ghrelin or Placebo |       |         |          |       |       | Area Under the Curve (AUC) |       |       |       |       |      | IV-Ghrelin or Placebo |  |  |        |  |  |
|                        |       |            |                 |            |            |      |          |         | Baseline                                |         |       | IV-ASA |       |       | BxAc=0                |       |         | Baseline |       |       | Post-LD                    |       |       | IV-AC |       |      | Post-AC               |  |  | BxAc=0 |  |  |
| p                      | q     | d          | d               | d          | d          | d    | d        | d       | p                                       | q       | d     | d      | d     | d     | d                     | d     | d       | d        | d     | d     | d                          | d     | d     | d     | d     | d    |                       |  |  |        |  |  |
| HILICneg_342.1188_5.18 | HILIC | neg        | 5.18            | 342.1188   |            |      | 4        |         | 0.08422                                 | 0.41003 | 0.53  | 0.02   | 1.28  | 0.66  | 0.52                  | -0.06 | 0.04362 | 0.42056  | 0.69  | 0.16  | 0.78                       | 1.01  | 0.79  | 0.63  | 0.63  | 0.13 |                       |  |  |        |  |  |
| RPpos_342.1562_2.06    | RP    | pos        | 2.06            | 342.1562   |            |      | 4        |         | 0.55320                                 | 0.80545 | 0.16  | 0.29   | 0.16  | -0.11 | 0.61                  | 1.09  | 0.09674 | 0.56677  | 1.18  | 0.86  | 0.40                       | 1.33  | 0.47  | 2.73  | 0.38  |      |                       |  |  |        |  |  |
| RPpos_342.1841_5.58    | RP    | pos        | 5.58            | 342.1841   |            |      | 4        |         | 0.15054                                 | 0.49265 | 0.15  | 0.05   | 0.35  | 0.11  | 0.24                  | 0.40  | 0.69202 | 0.95008  | -0.03 | -0.10 | 0.06                       | 0.04  | 0.04  | -0.15 | -0.19 |      |                       |  |  |        |  |  |
| RPneg_342.2106_7.983   | RP    | neg        | 7.983           | 342.2106   |            |      | 4        |         | 0.86164                                 | 0.94816 | 0.01  | 0.14   | 0.04  | 0.17  | 0.21                  | -0.04 | 0.24934 | 0.76566  | 0.31  | 0.20  | 0.39                       | 0.30  | 0.19  | 0.22  | 0.33  |      |                       |  |  |        |  |  |
| HILICpos_342.212_1.91  | HILIC | pos        | 1.91            | 342.2120   |            |      | 4        |         | 0.52513                                 | 0.79012 | 0.14  | -0.02  | 0.51  | 0.11  | 0.65                  | 0.21  | 0.08212 | 0.99762  | -0.04 | -0.06 | 0.21                       | 0.02  | 0.17  | -0.29 | -0.38 |      |                       |  |  |        |  |  |
| HILICpos_342.2480_0.48 | HILIC | pos        | 0.48            | 342.2480   |            |      | 4        |         | 0.33713                                 | 0.66052 | -0.39 | 0.11   | 0.39  | 0.11  | 0.07                  | 0.25  | 0.89552 | 0.38463  | 0.07  | -0.08 | 0.09                       | -0.42 | 0.34  | -0.28 | 0.53  |      |                       |  |  |        |  |  |
| RPpos_342.2484_5.92    | RP    | pos        | 5.92            | 342.2484   |            |      | 4        |         | 0.37550                                 | 0.69101 | -0.23 | -0.32  | 0.45  | 0.03  | -0.07                 | 0.08  | 0.63462 | 0.93546  | -0.22 | -0.17 | 0.03                       | -0.24 | 0.21  | -0.81 | -0.29 |      |                       |  |  |        |  |  |
| HILICpos_342.2631_0.66 | HILIC | pos        | 0.66            | 342.2631   |            |      | 4        |         | 0.13823                                 | 0.47782 | 0.67  | 0.20   | 0.75  | 0.64  | 1.21                  | 0.16  | 0.43434 | 0.87583  | 0.49  | 0.62  | 0.72                       | 0.51  | 0.09  | 0.14  | -0.12 |      |                       |  |  |        |  |  |
| RPpos_342.2638_7.92    | RP    | pos        | 7.92            | 342.2638   |            |      | 4        |         | 0.32539                                 | 0.65100 | 0.39  | 0.17   | 0.43  | 0.43  | 0.86                  | 0.13  | 0.13454 | 0.63154  | 0.45  | 0.53  | 0.49                       | 0.43  | 0.27  | 0.45  | -0.01 |      |                       |  |  |        |  |  |
| RPneg_342.26407_10.47  | RP    | neg        | 10.47           | 342.2641   |            |      | 4        |         | 0.96289                                 | 0.98663 | 0.01  | 0.39   | 0.19  | 0.16  | 0.44                  | 0.20  | 0.70191 | 0.95186  | 0.02  | 0.12  | 0.54                       | -0.26 | -0.32 | 0.11  | -0.03 |      |                       |  |  |        |  |  |
| RPpos_342.2645_7.84    | RP    | pos        | 7.84            | 342.2645   |            |      | 4        |         | 0.34776                                 | 0.66839 | 0.37  | 0.17   | 0.47  | 0.34  | 0.92                  | 0.06  | 0.92232 | 0.98881  | 0.01  | 0.16  | 0.49                       | 0.05  | -0.27 | -0.12 | -0.24 |      |                       |  |  |        |  |  |
| HILICneg_342.9736_0.88 | HILIC | neg        | 0.88            | 342.9736   |            |      | 4        |         | 0.11676                                 | 0.45264 | 0.31  | 0.42   | 1.10  | 0.53  | 0.36                  | -0.08 | 0.09065 | 0.55453  | 0.49  | 0.53  | -0.13                      | 0.51  | 0.88  | 0.26  | 0.16  |      |                       |  |  |        |  |  |
| HILICneg_342.9999_7.13 | HILIC | neg        | 7.13            | 342.9999   |            |      | 4        |         | 0.93118                                 | 0.97542 | 0.02  | 0.59   | 0.47  | -0.05 | 0.04                  | -0.40 | 0.04731 | 0.43442  | 0.48  | 0.56  | 0.78                       | 1.13  | 0.44  | -0.05 | -0.19 |      |                       |  |  |        |  |  |
| HILICpos_343.0154_6.25 | HILIC | pos        | 6.25            | 343.0154   |            |      | 4        |         | 0.90487                                 | 0.96493 | 0.02  | 0.15   | 0.45  | 0.12  | -0.10                 | -0.06 | 0.07586 | 0.52146  | 0.44  | 0.54  | 0.48                       | 0.70  | 0.46  | 0.06  | -1.05 |      |                       |  |  |        |  |  |
| RPneg_343.07071_3.26   | RP    | neg        | 3.26            | 343.0707   |            |      | 4        |         | 0.11237                                 | 0.44804 | 0.41  | 0.34   | 1.53  | 0.52  | 0.21                  | -0.03 | 0.00719 | 0.17915  | 0.70  | 0.27  | 0.16                       | 0.63  | 1.62  | 0.57  | 0.03  |      |                       |  |  |        |  |  |
| RPneg_343.07172_3.524  | RP    | neg        | 3.524           | 343.0717   |            |      | 4        |         | 0.08006                                 | 0.40441 | 0.35  | 0.52   | 1.22  | 0.41  | 0.29                  | -0.31 | 0.06468 | 0.49288  | 0.75  | 0.31  | 0.41                       | 1.06  | 1.30  | 0.76  | -0.16 |      |                       |  |  |        |  |  |
| RPneg_343.08493_5.195  | RP    | neg        | 5.195           | 343.0849   |            |      | 4        |         | 0.85113                                 | 0.94402 | -0.05 | 0.13   | 0.05  | 0.01  | -0.07                 | 0.04  | 0.18654 | 0.70221  | 0.35  | 0.37  | 0.44                       | 0.32  | 0.32  | 0.39  | 0.24  |      |                       |  |  |        |  |  |
| RPneg_343.08521_6.128  | RP    | neg        | 6.128           | 343.0852   |            |      | 4        |         | 0.05883                                 | 0.36409 | 0.24  | 0.19   | 0.27  | 0.29  | 0.26                  | 0.50  | 0.07301 | 0.51495  | -0.27 | -0.34 | -0.33                      | -0.29 | -0.21 | -0.21 | -0.29 |      |                       |  |  |        |  |  |
| RPneg_343.08572_8.389  | RP    | neg        | 8.389           | 343.0857   |            |      | 4        |         | 0.55784                                 | 0.80849 | -0.18 | 0.11   | 0.31  | 0.06  | 0.21                  | 0.36  | 0.58421 | 0.92465  | -0.10 | -0.52 | 0.21                       | 0.28  | -0.11 | 0.04  | -0.59 |      |                       |  |  |        |  |  |
| HILICneg_343.086_0.58  | HILIC | neg        | 0.58            | 343.0860   |            |      | 4        |         | 0.23143                                 | 0.57256 | 0.19  | -0.07  | 0.10  | 0.28  | 0.41                  | 0.40  | 0.14584 | 0.64924  | -0.25 | -0.27 | -0.21                      | -0.30 | -0.12 | -0.31 | -0.51 |      |                       |  |  |        |  |  |
| RPpos_343.1066_7.72    | RP    | pos        | 7.72            | 343.1066   |            |      | 4        |         | 0.53541                                 | 0.79625 | -0.08 | -0.03  | 0.15  | -0.12 | -0.03                 | -0.27 | 0.55854 | 0.91985  | 0.04  | -0.02 | 0.02                       | 0.12  | -0.10 | 0.23  | 0.00  |      |                       |  |  |        |  |  |
| HILICpos_343.1154_5.92 | HILIC | pos        | 5.92            | 343.1154   |            |      | 4        |         | 0.68167                                 | 0.86782 | -0.07 | 0.28   | 0.48  | 0.33  | -0.19                 | -0.22 | 0.02649 | 0.34344  | 0.43  | 0.50  | 0.54                       | 0.46  | 0.34  | 0.42  | -0.12 |      |                       |  |  |        |  |  |
| RPneg_343.12195_10.637 | RP    | neg        | 10.637          | 343.1220   |            |      | 4        |         | 0.31385                                 | 0.64157 | 0.29  | -0.30  | 0.01  | 0.55  | 2.10                  | -0.07 | 0.78257 | 0.96604  | 0.02  | 0.30  | 0.12                       | 0.08  | -0.29 | -0.10 | 0.15  |      |                       |  |  |        |  |  |
| HILICneg_343.1234_6.41 | HILIC | neg        | 6.41            | 343.1234   |            |      | 4        |         | 0.05990                                 | 0.36580 | -0.40 | -0.10  | -0.22 | -0.31 | -0.27                 | -0.52 | 0.04293 | 0.41770  | -0.57 | -0.60 | -0.51                      | -0.12 | -0.66 | -1.00 | -0.04 |      |                       |  |  |        |  |  |
| RPneg_343.12717_2.812  | RP    | neg        | 2.812           | 343.1272   |            |      | 4        |         | 0.61236                                 | 0.83437 | 0.11  | 0.27   | 0.40  | 0.25  | 0.13                  | -0.31 | 0.03281 | 0.37254  | 0.71  | 0.58  | 0.69                       | 0.80  | 0.74  | 0.63  | 0.46  |      |                       |  |  |        |  |  |
| RPneg_343.14017_6.771  | RP    | neg        | 6.771           | 343.1402   |            |      | 4        |         | 0.01639                                 | 0.23695 | 0.31  | -0.09  | 0.25  | 0.54  | 0.53                  | -0.78 | 0.54953 | 0.91731  | -0.14 | 0.05  | -0.14                      | -0.17 | -0.09 | -0.06 | -0.29 |      |                       |  |  |        |  |  |
| RPneg_343.14044_6.614  | RP    | neg        | 6.614           | 343.1404   |            |      | 4        |         | 0.01283                                 | 0.21615 | 0.26  | -0.08  | 0.23  | 0.39  | 0.60                  | -0.62 | 0.76946 | 0.96454  | -0.08 | -0.02 | 0.01                       | -0.08 | -0.02 | -0.08 | -0.42 |      |                       |  |  |        |  |  |
| RPneg_343.1405_6.995   | RP    | neg        | 6.995           | 343.1405   |            |      | 4        |         | 0.23381                                 | 0.57538 | 0.14  | 0.14   | 0.19  | 0.14  | 0.37                  | -0.60 | 0.73344 | 0.95834  | -0.11 | 0.14  | -0.26                      | -0.12 | -0.07 | 0.03  | -0.12 |      |                       |  |  |        |  |  |
| RPpos_343.155_9.26     | RP    | pos        | 9.26            | 343.1550   |            |      | 4        |         | 0.10705                                 | 0.44049 | -0.55 | -0.37  | 0.11  | -0.11 | 0.04                  | 0.10  | 0.10679 | 0.58505  | -0.17 | 0.13  | 0.90                       | 0.49  | 1.75  | -0.28 | -0.06 |      |                       |  |  |        |  |  |
| RPpos_343.1609_10.9    | RP    | pos        | 10.9            | 343.1609   |            |      | 4        |         | 0.00600                                 | 0.15188 | 1.04  | -0.03  | 0.65  | 0.82  | 2.01                  | -0.12 | 0.62416 | 0.93354  | -0.17 | -0.34 | 0.26                       | -0.33 | -0.16 | -0.19 | -0.10 |      |                       |  |  |        |  |  |
| HILICpos_343.1729_0.45 | HILIC | pos        | 0.45            | 343.1729   |            |      | 4        |         | 0.09156                                 | 0.29799 | -0.33 | -0.42  | 0.09  | 0.10  | -0.62                 | 0.11  | 0.05082 | 0.44885  | -0.70 | -0.32 | -0.43                      | -0.67 | -0.32 | -0.21 | -0.50 |      |                       |  |  |        |  |  |
| RPpos_343.1729_5.55    | RP    | pos        | 5.55            | 343.1729   |            |      | 4        |         | 0.15727                                 | 0.50954 | -0.22 | -0.41  | 0.22  | 0.20  | -0.55                 | 0.19  | 0.08002 | 0.53017  | -0.63 | -0.37 | -0.46                      | -0.67 | -0.17 | -0.19 | -0.45 |      |                       |  |  |        |  |  |
| RPpos_343.1788_8.35    | RP    | pos        | 8.35            | 343.1788   |            |      | 4        |         | 0.00984                                 | 0.17996 | 0.98  | -0.07  | 0.37  | 0.71  | 2.23                  | -0.23 | 0.03497 | 0.98984  | 0.90  | -0.11 | 0.47                       | -0.24 | 0.05  | -0.23 | -0.06 |      |                       |  |  |        |  |  |
| RPpos_343.1911_5.86    | RP    | pos        | 5.86            | 343.1911   |            |      | 4        |         | 0.17719                                 | 0.52320 | 0.33  | 0.30   | 0.55  | 0.32  | 0.43                  | 0.60  | 0.57290 | 0.92321  | -0.13 | -0.17 | 0.08                       | 0.04  | 0.09  | -0.24 | -0.32 |      |                       |  |  |        |  |  |
| RPneg_343.19138_9.759  | RP    | neg        | 9.759           | 343.1914   |            |      | 4        |         | 0.30993                                 | 0.63830 | -0.12 | -0.23  | -0.23 | -0.02 | -0.13                 | 0.07  | 0.34709 | 0.82996  | 0.57  | -0.17 | 0.89                       | -0.17 | 1.02  | 0.86  | 1.03  |      |                       |  |  |        |  |  |
| RPpos_343.1951_10.86   | RP    | pos        | 10.86           | 343.1951   |            |      | 4        |         | 0.12828                                 | 0.46431 | 0.49  | 0.24   | 0.30  | 0.05  | 1.82                  | 0.22  | 0.81990 | 0.97256  | 0.02  | -0.25 | 0.51                       | -0.14 | -0.11 | 0.05  | 0.22  |      |                       |  |  |        |  |  |
| RPneg_343.22699_9.867  | RP    | neg        | 9.867           | 343.2270   |            |      | 4        |         | 0.88834                                 | 0.95680 | -0.06 | 0.22   | 0.00  | -0.12 | 0.01                  | 0.12  | 0.74676 | 0.96077  | 0.05  | -0.05 | -0.07                      | 0.12  | -0.05 | 0.45  | -0.13 |      |                       |  |  |        |  |  |
| RPneg_343.2851_11.782  | RP    | neg        | 11.782          | 343.2851   |            |      | 4        |         | 0.12376                                 | 0.45914 | -0.23 | -0.46  | 0.01  | 0.03  | 0.15                  | -0.24 | 0.58067 | 0.92418  | -0.10 | -0.41 | 0.31                       | -0.28 | -0.31 | 0.37  | 0.79  |      |                       |  |  |        |  |  |
| RPpos_343.339_11.08    | RP    | pos        | 11.08           | 343.3390   |            |      | 4        |         | 0.79092                                 | 0.91828 | -0.08 | 0.41   | -0.01 | 0.16  | 1.23                  | 0.03  | 0.80078 | 0.96969  | 0.09  | -0.52 | 0.77                       | -0.64 | 0.94  | 0.28  | -0.19 |      |                       |  |  |        |  |  |
| RPpos_343.6884_5.58    | RP    | pos        | 5.58            | 343.6884   |            |      | 4        |         | 0.11497                                 | 0.45044 | 0.22  | 0.09   | 0.29  | 0.20  | 0.33                  | 0.58  | 0.78380 | 0.96632  | -0.10 | -0.20 | -0.03                      | -0.08 | 0.04  | -0.13 | -0.25 |      |                       |  |  |        |  |  |
| HILICneg_343.7206_1.45 | HILIC | neg        | 1.45            | 343.7206   |            |      | 4        |         | 0.04736                                 | 0.34075 | -0.35 | 0.04   | -0.20 | -0.13 | -0.20                 | 0.27  | 0.00031 | 0.02650  | -0.64 | -0.51 | -0.78                      | -0.88 | -0.50 | -0.61 | -0.21 |      |                       |  |  |        |  |  |
| RPneg_343.86475_10.522 | RP    | neg        | 10.522          | 343.8648   |            |      | 4        |         | 0.32181                                 | 0.64796 | -0.33 | -0.56  | 0.21  | -0.15 | 0.05                  | -0.10 | 0.26811 | 0.78031  | 0.19  | 0.00  | -0.33                      | 0.41  | 0.27  | 0.14  | 0.11  |      |                       |  |  |        |  |  |
| HILICneg_343.9434_5.41 | HILIC | neg        | 5.41            | 343.9434   |            |      | 4        |         | 0.00501                                 | 0.14104 | -0.90 | -0.29  | -0.77 | -0.61 | 0.03                  | -1.30 | 0.16782 | 0.67881  | -0.61 | 0.07  | -0.63                      | 0.14  | -1.13 | -0.23 | 0.18  |      |                       |  |  |        |  |  |
| HILICneg_343.9761_1.07 | HILIC | neg        | 1.07            | 343.9761   |            |      | 4        |         | 0.05510                                 | 0.3566  |       |        |       |       |                       |       |         |          |       |       |                            |       |       |       |       |      |                       |  |  |        |  |  |



|                         |       |            |                 | IV-Alcohol self-administration (IV-ASA) |            |      |          |         |                            |         |       |                       |       |       |       |       | IV-Alcohol clamp (IV-AC) |         |       |       |       |                            |       |       |          |   |   |         |   |   |                       |   |   |        |   |   |
|-------------------------|-------|------------|-----------------|-----------------------------------------|------------|------|----------|---------|----------------------------|---------|-------|-----------------------|-------|-------|-------|-------|--------------------------|---------|-------|-------|-------|----------------------------|-------|-------|----------|---|---|---------|---|---|-----------------------|---|---|--------|---|---|
| Feature_ID              | Mode  | Ionization | Average_Rt.min. | Average_Mz                              | Metabolite | MSMS | ID_Level | HMDB_ID | Area Under the Curve (AUC) |         |       |                       |       |       |       |       |                          |         |       |       |       | Baseline                   |       |       |          |   |   |         |   |   |                       |   |   |        |   |   |
|                         |       |            |                 |                                         |            |      |          |         | Area Under the Curve (AUC) |         |       | IV-Ghrelin or Placebo |       |       |       |       |                          | BrAc=0  |       |       |       | Area Under the Curve (AUC) |       |       | Baseline |   |   | Post-LD |   |   | IV-Ghrelin or Placebo |   |   | BrAc=0 |   |   |
|                         |       |            |                 |                                         |            |      |          |         | p                          | q       | d     | d                     | d     | d     | d     | d     | d                        | d       | d     | d     | d     | d                          | d     | d     | d        | d | d | d       | d | d | d                     | d | d | d      | d | d |
| HILICneg_349.1247_4.33  | HILIC | neg        | 4.33            | 349.1247                                |            |      | 4        |         | 0.99803                    | 0.99918 | 0.03  | 0.05                  | 0.22  | -0.03 | 0.24  | 0.22  | 0.00114                  | 0.06196 | 0.33  | 0.33  | 0.31  | 0.15                       | 0.36  | 0.35  | 0.21     |   |   |         |   |   |                       |   |   |        |   |   |
| RPneg_349.16586_8.677   | RP    | neg        | 8.677           | 349.1659                                |            |      | 4        |         | 0.67729                    | 0.86609 | 0.10  | 0.05                  | 1.00  | 0.17  | 0.19  | -0.13 | 0.66079                  | 0.94264 | 0.14  | -0.10 | 0.52  | 0.02                       | 0.26  | 0.23  | -0.32    |   |   |         |   |   |                       |   |   |        |   |   |
| RPneg_349.16721_7.934   | RP    | neg        | 7.934           | 349.1672                                |            |      | 4        |         | 0.02470                    | 0.27578 | 1.32  | 1.26                  | 1.35  | 1.41  | 1.64  | 1.72  | 0.47965                  | 0.89439 | 0.17  | 0.14  | 0.26  | 0.07                       | 0.17  | 0.18  | 0.25     |   |   |         |   |   |                       |   |   |        |   |   |
| RPneg_349.16748_7.704   | RP    | neg        | 7.704           | 349.1675                                |            |      | 4        |         | 0.03213                    | 0.30003 | 1.76  | 1.77                  | 1.63  | 1.42  | 2.27  | 2.23  | 0.59781                  | 0.92780 | 0.13  | 0.09  | 0.28  | 0.03                       | 0.10  | 0.16  | 0.19     |   |   |         |   |   |                       |   |   |        |   |   |
| RPpos_349.1832_5.93     | RP    | pos        | 5.93            | 349.1832                                |            |      | 4        |         | 0.12587                    | 0.65171 | -0.32 | -0.25                 | 0.74  | -0.21 | -0.28 | -0.05 | 0.51511                  | 0.90748 | -0.26 | -0.18 | -0.57 | -0.45                      | 0.13  | -0.05 | -0.70    |   |   |         |   |   |                       |   |   |        |   |   |
| HILICneg_349.18341_6.41 | HILIC | neg        | 6.41            | 349.1834                                |            |      | 4        |         | 0.12587                    | 0.46183 | 0.39  | 0.00                  | -0.23 | 0.24  | 0.01  | -0.67 | 0.85108                  | 0.91748 | 0.17  | 0.17  | 0.02  | 0.17                       | 0.02  | 0.45  | -0.12    |   |   |         |   |   |                       |   |   |        |   |   |
| RPpos_349.1834_3.73     | RP    | pos        | 3.73            | 349.1834                                |            |      | 4        |         | 0.72172                    | 0.88633 | -0.15 | 0.09                  | 1.02  | -0.16 | -0.57 | -0.23 | 0.54374                  | 0.91513 | -0.29 | -0.51 | -0.14 | 0.06                       | -0.03 | -0.37 | -0.37    |   |   |         |   |   |                       |   |   |        |   |   |
| RPpos_349.1893_10.62    | RP    | pos        | 10.62           | 349.1893                                |            |      | 4        |         | 0.59582                    | 0.82675 | 0.19  | -0.02                 | 0.40  | 1.20  | 2.27  | 0.18  | 0.76970                  | 0.96458 | -0.01 | 0.09  | 0.07  | 0.02                       | -0.34 | -0.02 | 0.28     |   |   |         |   |   |                       |   |   |        |   |   |
| RPpos_349.2204_5.89     | RP    | pos        | 5.89            | 349.2204                                |            |      | 4        |         | 0.26273                    | 0.60008 | -0.30 | 0.65                  | -0.13 | -0.02 | -0.21 | -0.18 | 0.19747                  | 0.71327 | -0.34 | -0.26 | -0.26 | -0.77                      | -0.46 | 0.35  | -0.18    |   |   |         |   |   |                       |   |   |        |   |   |
| RPpos_349.2303_7.28     | RP    | pos        | 7.28            | 349.2303                                |            |      | 4        |         | 0.55069                    | 0.80400 | -0.17 | -0.36                 | 1.08  | -0.18 | -0.39 | 0.37  | 0.08787                  | 0.54719 | -0.55 | -0.37 | -0.12 | -0.44                      | -0.09 | -0.85 | -0.49    |   |   |         |   |   |                       |   |   |        |   |   |
| HILICpos_349.2308_6.95  | HILIC | pos        | 6.95            | 349.2308                                |            |      | 4        |         | 0.74029                    | 0.89561 | 0.05  | 0.16                  | 0.43  | 0.15  | 0.01  | -0.51 | 0.03571                  | 0.38620 | 0.32  | 0.31  | 0.40  | 0.81                       | 0.18  | -0.01 | -0.29    |   |   |         |   |   |                       |   |   |        |   |   |
| RPneg_349.23535_11.194  | RP    | neg        | 11.194          | 349.2354                                |            |      | 4        |         | 0.00330                    | 0.11850 | 1.23  | 0.02                  | 0.50  | 1.27  | 2.80  | -0.38 | 0.66114                  | 0.94270 | -0.13 | -0.26 | 0.22  | -0.30                      | -0.13 | -0.25 | 0.04     |   |   |         |   |   |                       |   |   |        |   |   |
| RPpos_349.2371_10.42    | RP    | pos        | 10.42           | 349.2371                                |            |      | 4        |         | 0.33785                    | 0.66080 | 0.29  | 0.54                  | 0.51  | 0.25  | 0.42  | -0.11 | 0.60402                  | 0.92892 | -0.53 | -0.23 | 0.42  | -0.42                      | -0.24 | -0.76 | 0.33     |   |   |         |   |   |                       |   |   |        |   |   |
| RPpos_349.2377_6.9      | RP    | pos        | 6.9             | 349.2377                                |            |      | 4        |         | 0.17599                    | 0.52139 | 0.51  | 0.15                  | 0.62  | 0.51  | 1.10  | 0.86  | 0.07896                  | 0.52784 | 0.29  | 0.26  | -0.27 | 0.02                       | 0.35  | 0.75  | 0.45     |   |   |         |   |   |                       |   |   |        |   |   |
| RPneg_349.23819_10.88   | RP    | neg        | 10.88           | 349.2382                                |            |      | 4        |         | 0.14418                    | 0.48467 | 0.51  | 0.26                  | 0.16  | -0.12 | 2.67  | 0.03  | 0.88266                  | 0.98281 | 0.03  | -0.29 | 0.75  | -0.40                      | -0.24 | 0.18  | 0.23     |   |   |         |   |   |                       |   |   |        |   |   |
| HILICpos_349.2492_1.83  | HILIC | pos        | 1.83            | 349.2492                                |            |      | 4        |         | 0.23206                    | 0.57346 | -0.35 | -0.21                 | 0.04  | -0.33 | -0.21 | -0.43 | 0.01252                  | 0.24002 | 0.79  | 0.18  | 0.34  | 0.97                       | 0.81  | 0.63  | 1.10     |   |   |         |   |   |                       |   |   |        |   |   |
| RPneg_349.84595_3.73    | RP    | neg        | 3.73            | 349.8460                                |            |      | 4        |         | 0.14513                    | 0.48584 | 0.37  | 0.35                  | 0.51  | 0.22  | 0.32  | 0.91  | 0.57007                  | 0.92121 | -0.31 | -0.24 | -0.29 | -0.43                      | -0.29 | -0.24 | -0.20    |   |   |         |   |   |                       |   |   |        |   |   |
| HILICneg_349.8462_0.48  | HILIC | neg        | 0.48            | 349.8462                                |            |      | 4        |         | 0.06561                    | 0.37687 | 0.50  | 0.40                  | 0.73  | 0.42  | 0.47  | 0.73  | 0.06377                  | 0.48984 | -0.65 | -0.58 | -0.57 | -0.65                      | -0.64 | -0.65 | -0.51    |   |   |         |   |   |                       |   |   |        |   |   |
| HILICneg_349.9987_5.62  | HILIC | neg        | 5.62            | 349.9987                                |            |      | 4        |         | 0.11134                    | 0.44687 | -0.45 | -0.14                 | 0.15  | -0.29 | -0.09 | -0.06 | 0.59092                  | 0.92657 | -0.16 | -0.29 | 0.19  | 0.57                       | 0.18  | 0.03  | -0.14    |   |   |         |   |   |                       |   |   |        |   |   |
| HILICneg_350.0058_6.22  | HILIC | neg        | 6.22            | 350.0058                                |            |      | 4        |         | 0.94115                    | 0.97848 | -0.05 | 0.24                  | 0.64  | 0.07  | -0.13 | -0.71 | 0.06659                  | 0.49785 | 0.72  | 0.35  | 0.51  | 1.37                       | 0.44  | 0.34  | -0.09    |   |   |         |   |   |                       |   |   |        |   |   |
| RPpos_350.0287_4.74     | RP    | pos        | 4.74            | 350.0287                                |            |      | 4        |         | 0.09862                    | 0.42931 | 0.17  | 0.04                  | 0.26  | 0.02  | 0.43  | 0.56  | 0.35033                  | 0.83125 | -0.12 | -0.07 | -0.05 | -0.08                      | -0.11 | -0.18 | -0.27    |   |   |         |   |   |                       |   |   |        |   |   |
| HILICpos_350.0517_0.94  | HILIC | pos        | 0.94            | 350.0517                                |            |      | 4        |         | 0.11630                    | 0.45208 | 0.33  | 0.27                  | 0.82  | 0.55  | 0.22  | -0.40 | 0.20205                  | 0.71822 | -0.15 | -0.10 | -0.39 | -0.10                      | 0.23  | 0.05  | -0.59    |   |   |         |   |   |                       |   |   |        |   |   |
| RPpos_350.0556_3.59     | RP    | pos        | 3.59            | 350.0556                                |            |      | 4        |         | 0.00562                    | 0.14718 | 0.49  | 0.39                  | 0.55  | 0.51  | 0.53  | 0.85  | 0.59041                  | 0.92655 | 0.22  | 0.13  | 0.20  | 0.07                       | 0.36  | 0.32  | 0.33     |   |   |         |   |   |                       |   |   |        |   |   |
| RPneg_350.0706_6.525    | RP    | neg        | 6.525           | 350.0709                                |            |      | 4        |         | 0.79288                    | 0.91950 | 0.16  | 0.09                  | 0.34  | 0.41  | 0.29  | -0.72 | 0.00988                  | 0.21165 | 1.20  | 1.21  | 1.21  | 1.07                       | 1.07  | 1.21  | 1.32     |   |   |         |   |   |                       |   |   |        |   |   |
| RPneg_350.08023_7.389   | RP    | neg        | 7.389           | 350.0802                                |            |      | 4        |         | 0.43703                    | 0.73499 | -0.13 | -0.04                 | 0.03  | -0.17 | -0.10 | -0.21 | 0.10719                  | 0.58531 | 3.62  | 3.70  | 3.26  | 2.80                       | 4.18  | 3.98  | 3.75     |   |   |         |   |   |                       |   |   |        |   |   |
| HILICpos_350.1114_4.07  | HILIC | pos        | 4.07            | 350.1114                                |            |      | 4        |         | 0.44195                    | 0.73848 | -0.05 | 0.06                  | 0.86  | 0.11  | -0.38 | -0.62 | 0.52963                  | 0.91148 | 0.04  | -0.17 | 0.28  | 0.33                       | 0.25  | -0.29 | -0.37    |   |   |         |   |   |                       |   |   |        |   |   |
| RPneg_350.15057_4.659   | RP    | neg        | 4.659           | 350.1506                                |            |      | 4        |         | 0.35475                    | 0.67401 | -0.18 | -0.15                 | -0.09 | 0.07  | 0.38  | -0.34 | 0.55009                  | 0.91739 | 0.21  | 0.14  | 0.20  | -0.11                      | 0.20  | 0.03  | 0.89     |   |   |         |   |   |                       |   |   |        |   |   |
| HILICneg_350.1509_1.85  | HILIC | neg        | 1.85            | 350.1509                                |            |      | 4        |         | 0.21688                    | 0.55882 | -0.22 | -0.21                 | -0.10 | 0.01  | 0.25  | -0.34 | 0.60187                  | 0.92848 | 0.18  | 0.03  | 0.18  | -0.07                      | 0.16  | -0.06 | 0.85     |   |   |         |   |   |                       |   |   |        |   |   |
| HILICneg_350.1564_6.98  | HILIC | neg        | 6.98            | 350.1564                                |            |      | 4        |         | 0.63098                    | 0.84377 | 0.10  | 0.24                  | 0.63  | 0.37  | -0.09 | -0.44 | 0.01039                  | 0.21692 | 0.40  | 0.49  | 0.34  | 0.77                       | 0.32  | 0.18  | -0.14    |   |   |         |   |   |                       |   |   |        |   |   |
| RPpos_350.1756_10.03    | RP    | pos        | 10.03           | 350.1756                                |            |      | 4        |         | 0.23192                    | 0.57334 | 0.51  | -0.07                 | 0.42  | 1.27  | 1.94  | -0.33 | 0.59565                  | 0.91988 | 0.13  | 0.21  | 0.56  | -0.16                      | 0.13  | 0.19  | 0.20     |   |   |         |   |   |                       |   |   |        |   |   |
| RPpos_350.182_5.5       | RP    | pos        | 5.5             | 350.1820                                |            |      | 4        |         | 0.25100                    | 0.59004 | 0.26  | 0.32                  | 0.49  | 0.35  | 0.32  | 0.69  | 0.58040                  | 0.92418 | 0.04  | 0.06  | 0.21  | 0.05                       | 0.11  | -0.11 | -0.20    |   |   |         |   |   |                       |   |   |        |   |   |
| RPpos_350.1985_6.29     | RP    | pos        | 6.29            | 350.1985                                |            |      | 4        |         | 0.22302                    | 0.56558 | 0.26  | 0.28                  | 0.51  | -0.22 | 0.29  | 0.39  | 0.72079                  | 0.95579 | -0.10 | -0.18 | 0.05  | -0.06                      | -0.05 | -0.28 | -0.28    |   |   |         |   |   |                       |   |   |        |   |   |
| RPneg_350.1989_6.18     | RP    | neg        | 6.18            | 350.1989                                |            |      | 4        |         | 0.76726                    | 0.90862 | 0.07  | -0.25                 | 0.76  | 0.36  | -0.07 | 0.43  | 0.27594                  | 0.78624 | -0.23 | 0.31  | 0.21  | -0.29                      | 0.04  | 1.13  | -0.08    |   |   |         |   |   |                       |   |   |        |   |   |
| RPneg_350.20953_9.321   | RP    | neg        | 9.321           | 350.2095                                |            |      | 4        |         | 0.26302                    | 0.60918 | -0.24 | 0.10                  | 0.01  | -0.46 | -0.06 | -0.35 | 0.99627                  | 0.99953 | -0.09 | 0.05  | -0.06 | -0.28                      | -0.01 | -0.09 | -0.07    |   |   |         |   |   |                       |   |   |        |   |   |
| RPpos_350.2123_10.57    | RP    | pos        | 10.57           | 350.2123                                |            |      | 4        |         | 0.11397                    | 0.44972 | 0.26  | 1.15                  | 0.14  | 0.73  | 0.06  | 0.55  | 0.00178                  | 0.08016 | -0.37 | -0.31 | -0.18 | 0.09                       | -0.40 | -0.42 | -0.33    |   |   |         |   |   |                       |   |   |        |   |   |
| RPpos_350.2675_10.28    | RP    | pos        | 10.28           | 350.2675                                |            |      | 4        |         | 0.92519                    | 0.97298 | 0.00  | -0.19                 | -0.02 | 0.13  | 0.24  | 0.95  | 0.15227                  | 0.65794 | -0.39 | -0.65 | -0.41 | -0.66                      | -0.36 | -0.25 | 0.04     |   |   |         |   |   |                       |   |   |        |   |   |
| HILICneg_350.6651_1.45  | HILIC | neg        | 1.45            | 350.6651                                |            |      | 4        |         | 0.81370                    | 0.92914 | -0.09 | 0.07                  | 0.01  | -0.06 | 0.06  | 0.28  | 0.08297                  | 0.53662 | -0.33 | -0.29 | -0.40 | -0.33                      | -0.24 | -0.34 | -0.14    |   |   |         |   |   |                       |   |   |        |   |   |
| HILICneg_350.8854_4.33  | HILIC | neg        | 4.33            | 350.8854                                |            |      | 4        |         | 0.76210                    | 0.90578 | -0.03 | 0.35                  | 0.45  | -0.09 | -0.05 | 0.07  | 0.00463                  | 0.14157 | 0.28  | 0.34  | 0.07  | 0.22                       | 0.55  | 0.16  | 0.25     |   |   |         |   |   |                       |   |   |        |   |   |
| HILICneg_350.9726_6.15  | HILIC | neg        | 6.15            | 350.9726                                |            |      | 4        |         | 0.38154                    | 0.69531 | -0.10 | 0.07                  | 0.06  | 0.06  | -0.11 | -1.00 | 0.45370                  | 0.88338 | 0.49  | 0.44  | 0.93  | 1.59                       | 0.16  | 0.05  | -0.02    |   |   |         |   |   |                       |   |   |        |   |   |
| RPneg_351.00436_2.112   | RP    | neg        | 2.112           | 351.0044                                |            |      | 4        |         | 0.59701                    | 0.99886 | 0.01  | 0.09                  | 0.91  | 0.12  | -0.10 | -0.45 | 0.00297                  | 0.10945 | 1.24  | 0.80  | 2.15  | 2.19                       | 1.12  | 0.53  | -0.09    |   |   |         |   |   |                       |   |   |        |   |   |
| HILICneg_351.0061_4.05  | HILIC | neg        | 4.05            | 351.0061                                |            |      | 4        |         | 0.54891                    | 0.80347 | 0.15  | 0.33                  | 1.35  | 0.31  | -0.16 | -0.61 | 0.00076                  | 0.04774 | 1.40  | 0.83  | 1.89  | 2.85                       | 1.46  | 0.40  | 0.10     |   |   |         |   |   |                       |   |   |        |   |   |
| RPneg_351.01132_3.524   | RP    | neg        | 3.524           | 351.0113                                |            |      | 4        |         | 0.08580                    | 0.41134 | 0.40  | 0.47                  | 1.07  | 1.03  | 0.24  | -0.06 | 0.00541                  | 0.15437 | 0.83  | -0.06 | 0.54  | 1.17                       | 0.62  | 1.78  | 0.12     |   |   |         |   |   |                       |   |   |        |   |   |
| RPneg_351.01874_5.373   | RP    | neg        | 5.373           | 351.0187                                |            |      | 4        |         | 0.46237                    | 0.75264 | 0.13  | 0.05                  | 0.52  | 0.49  | -0.05 | -0.14 | 0.35264                  | 0.83234 | 0.44  | -0.23 | -0.02 | 0.41                       | 1.14  | 1.17  | 1.71     |   |   |         |   |   |                       |   |   |        |   |   |
| HILICneg_351.0351_2.57  | HILIC | neg        | 2.57            | 351.0351                                |            |      | 4        |         | 0.03599                    | 0.31053 | -0.45 | -0.22                 | -0.27 | -0.31 | -0.50 | 0.33  | 0.56878                  | 0.92109 | -0.39 | 0.01  | 0.13  | -0.74                      | -0.56 | -0.58 | 0.28     |   |   |         |   |   |                       |   |   |        |   |   |
| HILICneg_351.0572_7.11  | HILIC | neg        | 7.11            | 351.0572                                |            |      | 4        |         | 0.51078                    | 0.78283 | -0.13 | 0.16                  | -0.02 | -0.09 | 0.05  | -0.60 | 0.20359                  | 0.71972 | -0.32 | -0.28 | -0.36 | 0.01                       | -0.43 | -0.36 | -0.29    |   |   |         |   |   |                       |   |   |        |   |   |
| HILICneg_351.0573_1.84  | HILIC | neg        | 1.84            | 351.0573                                |            |      | 4        |         | 0.76726                    | 0.90862 | 0.07  | -0.25                 | 0.76  | 0.36  | -0.07 | 0.43  | 0.27594                  | 0.78624 | -0.23 | 0.31  | 0.21  | -0.29                      | 0.04  | 1.13  | -0.08    |   |   |         |   |   |                       |   |   |        |   |   |
| RPneg_351.07571_8.767   | RP    | neg        | 8.767           | 351.0757                                |            |      | 4        |         | 0.31687                    | 0.64428 | -0.17 | -0.15                 | -0.22 | -0.16 | 0.12  | -0.02 | 0.28710                  | 0.79384 | 0.12  | 0.09  | 0.12  | 0.12                       | 0.12  | -0.02 | 0.36     |   |   |         |   |   |                       |   |   |        |   |   |
| RPneg_351.0925_7.163    | RP    | neg        | 7.163           | 351.0925                                |            |      | 4        |         | 0.35447                    | 0.67393 | 0.45  | 0.76                  | 0.61  | 0.19  | 0.95  | -0.06 | 0.25219                  | 0.76793 | 0.80  | 0.81  | 0.81  | 0.89                       | 0.62  | 0.75  | 0.13     |   |   |         |   |   |                       |   |   |        |   |   |
| HILICneg_351.0931_0.4   | HILIC | neg        | 0.4             | 351.0931                                |            |      |          |         |                            |         |       |                       |       |       |       |       |                          |         |       |       |       |                            |       |       |          |   |   |         |   |   |                       |   |   |        |   |   |







| Feature_ID             | Mode  | Ionization | Average_Rt.min. | Average_Mz | Metabolite | MSMS | ID_Level | HMDB_ID | IV-Alcohol self-administration (IV-ASA) |         |       |        |       |       |                       |       |            |         |         |       |          |       | IV-Alcohol clamp (IV-AC)   |         |       |      |            |   |                       |   |          |   |         |   |            |   |         |   |
|------------------------|-------|------------|-----------------|------------|------------|------|----------|---------|-----------------------------------------|---------|-------|--------|-------|-------|-----------------------|-------|------------|---------|---------|-------|----------|-------|----------------------------|---------|-------|------|------------|---|-----------------------|---|----------|---|---------|---|------------|---|---------|---|
|                        |       |            |                 |            |            |      |          |         | Area Under the Curve (AUC)              |         |       |        |       |       | IV-Ghrelin or Placebo |       |            |         |         |       |          |       | Area Under the Curve (AUC) |         |       |      |            |   | IV-Ghrelin or Placebo |   |          |   |         |   |            |   |         |   |
|                        |       |            |                 |            |            |      |          |         | Baseline                                |         |       | IV-ASA |       |       | Baseline              |       | IV-Ghrelin |         | Placebo |       | Baseline |       |                            | Post-LD |       |      | IV-Ghrelin |   | Placebo               |   | Baseline |   | Post-LD |   | IV-Ghrelin |   | Placebo |   |
|                        |       |            |                 |            |            |      |          |         | p                                       | q       | d     | d      | d     | d     | d                     | d     | d          | d       | d       | p     | q        | d     | d                          | d       | d     | d    | d          | d | p                     | q | d        | d | d       | d | d          | d | d       | d |
| RPpos_359.3626_9.78    | RP    | pos        | 9.78            |            |            |      | 4        |         | 0.73560                                 | 0.89335 | -0.10 | 0.08   | 0.01  | 0.59  | -0.02                 | 0.15  | 0.75798    | 0.96233 | -0.11   | -0.03 | 0.74     | -0.61 | -0.43                      | 0.40    | 0.20  | 0.20 |            |   |                       |   |          |   |         |   |            |   |         |   |
| RPpos_359.7134_5.7     | RP    | pos        | 5.7             | 359.7134   |            |      | 4        |         | 0.30582                                 | 0.63468 | -0.28 | 0.01   | 0.60  | -0.35 | -0.31                 | 0.54  | 0.02904    | 0.35545 | -0.32   | -0.35 | -0.19    | -0.43 | -0.13                      | 0.06    | -0.41 |      |            |   |                       |   |          |   |         |   |            |   |         |   |
| HILICneg_359.8777_4.88 | HILIC | neg        | 4.88            | 359.8777   |            |      | 4        |         | 0.53109                                 | 0.79398 | -0.09 | 0.35   | 0.40  | -0.09 | -0.12                 | 0.70  | 0.15909    | 0.66769 | -0.34   | -0.08 | -0.57    | 0.12  | -0.19                      | -0.87   | -0.54 |      |            |   |                       |   |          |   |         |   |            |   |         |   |
| HILICneg_360.059_5.26  | HILIC | neg        | 5.26            | 360.0590   |            |      | 4        |         | 0.01799                                 | 0.24482 | -0.29 | -0.04  | 0.13  | -0.28 | 0.16                  | -0.39 | 0.57811    | 0.92331 | 0.09    | -0.08 | 0.23     | 0.53  | 0.24                       | -0.18   | -0.29 |      |            |   |                       |   |          |   |         |   |            |   |         |   |
| HILICneg_360.0607_5.41 | HILIC | neg        | 5.41            | 360.0607   |            |      | 4        |         | 0.13333                                 | 0.92887 | 0.05  | 0.35   | 0.28  | -0.07 | 0.42                  | 0.16  | 0.15533    | 0.66379 | 0.00    | -0.16 | 0.31     | 0.95  | 0.17                       | 0.25    | -1.13 |      |            |   |                       |   |          |   |         |   |            |   |         |   |
| RPneg_360.0995_1.404   | RP    | neg        | 1.404           | 360.0995   |            |      | 4        |         | 0.20272                                 | 0.92737 | 0.05  | 0.35   | 0.28  | -0.07 | 0.42                  | 0.16  | 0.0660     | 0.2993  | 0.96    | 0.46  | 0.56     | 1.84  | 0.77                       | 0.17    | -0.54 |      |            |   |                       |   |          |   |         |   |            |   |         |   |
| RPneg_360.11713_10.867 | RP    | neg        | 10.867          | 360.1171   |            |      | 4        |         | 0.85872                                 | 0.94701 | 0.03  | -0.17  | 0.07  | 0.50  | -0.10                 | 0.54  | 0.96015    | 0.99553 | -0.07   | -0.13 | 0.09     | -0.24 | -0.13                      | 0.03    | 0.18  |      |            |   |                       |   |          |   |         |   |            |   |         |   |
| HILICneg_360.1297_5.18 | HILIC | neg        | 5.18            | 360.1297   |            |      | 4        |         | 0.27170                                 | 0.60774 | 0.35  | 0.03   | 1.12  | 0.51  | 0.26                  | 0.04  | 0.02987    | 0.36003 | 0.61    | 0.24  | 0.76     | 0.91  | 0.94                       | 0.25    | 0.36  |      |            |   |                       |   |          |   |         |   |            |   |         |   |
| RPpos_360.1644_5.46    | RP    | pos        | 5.46            | 360.1644   |            |      | 4        |         | 0.09753                                 | 0.42766 | 0.20  | 0.12   | 0.29  | 0.10  | 0.40                  | 0.58  | 0.65128    | 0.93978 | -0.13   | -0.14 | -0.05    | -0.14 | -0.02                      | -0.22   | -0.22 |      |            |   |                       |   |          |   |         |   |            |   |         |   |
| RPneg_360.19363_10.874 | RP    | neg        | 10.874          | 360.1936   |            |      | 4        |         | 0.93803                                 | 0.97750 | -0.03 | 0.62   | 0.06  | 1.23  | -0.50                 | -0.63 | 0.22807    | 0.74513 | -0.34   | -0.17 | 1.42     | 0.05  | -0.10                      | -0.30   | -0.37 |      |            |   |                       |   |          |   |         |   |            |   |         |   |
| HILICneg_360.2387_0.74 | HILIC | neg        | 0.74            | 360.2387   |            |      | 4        |         | 0.25611                                 | 0.59417 | 0.56  | 0.24   | 0.73  | 0.48  | 0.55                  | -0.13 | 0.10595    | 0.58363 | 0.90    | 0.82  | 0.77     | 0.81  | 0.17                       | 0.99    | -0.08 |      |            |   |                       |   |          |   |         |   |            |   |         |   |
| RPneg_360.23926_7.257  | RP    | neg        | 7.257           | 360.2393   |            |      | 4        |         | 0.18524                                 | 0.53180 | 0.62  | 0.36   | 0.97  | 0.60  | 0.57                  | -0.10 | 0.07258    | 0.51376 | 0.82    | 0.92  | 0.85     | 0.72  | 0.21                       | 0.88    | -0.07 |      |            |   |                       |   |          |   |         |   |            |   |         |   |
| RPpos_360.2751_7.59    | RP    | pos        | 7.59            | 360.2751   |            |      | 4        |         | 0.24851                                 | 0.58805 | 0.40  | 0.20   | 0.53  | 0.50  | 0.87                  | 0.08  | 0.06312    | 0.48793 | 0.56    | 0.26  | 0.63     | 0.62  | 0.45                       | 0.50    | 0.05  |      |            |   |                       |   |          |   |         |   |            |   |         |   |
| RPpos_360.3112_10.56   | RP    | pos        | 10.56           | 360.3112   |            |      | 4        |         | 0.78921                                 | 0.91753 | 0.01  | 0.07   | -0.23 | 0.27  | -0.07                 | 0.84  | 0.94877    | 0.99317 | -0.11   | 0.04  | -0.01    | -0.25 | -0.25                      | -0.26   | 0.11  |      |            |   |                       |   |          |   |         |   |            |   |         |   |
| RPpos_360.3233_11.58   | RP    | pos        | 11.58           | 360.3233   |            |      | 4        |         | 0.93848                                 | 0.97759 | 0.03  | 0.31   | 0.12  | 0.14  | 0.14                  | -0.76 | 0.72799    | 0.95678 | -0.01   | 0.58  | -0.02    | 0.12  | -0.44                      | 0.07    | 0.01  |      |            |   |                       |   |          |   |         |   |            |   |         |   |
| RPpos_360.3633_9.28    | RP    | pos        | 9.28            | 360.3633   |            |      | 4        |         | 0.28093                                 | 0.61509 | -0.27 | 2.22   | -0.18 | -0.27 | -0.11                 | 0.28  | 0.22001    | 0.73681 | -0.35   | -0.38 | -0.23    | -0.43 | 0.35                       | -0.07   | 0.32  |      |            |   |                       |   |          |   |         |   |            |   |         |   |
| HILICneg_360.9761_4.21 | HILIC | neg        | 4.21            | 360.9761   |            |      | 4        |         | 0.35901                                 | 0.67767 | -0.28 | -0.92  | 0.45  | -0.84 | -0.83                 | -0.69 | 0.95213    | 0.99379 | -0.07   | 0.40  | -0.36    | 0.13  | 0.16                       | -0.24   | -0.72 |      |            |   |                       |   |          |   |         |   |            |   |         |   |
| HILICneg_361.0069_0.49 | HILIC | neg        | 0.49            | 361.0063   |            |      | 4        |         | 0.44789                                 | 0.74278 | 0.09  | 0.06   | 0.32  | -0.02 | 0.09                  | 0.51  | 0.16116    | 0.67081 | -0.21   | -0.21 | -0.21    | -0.21 | -0.18                      | -0.35   | 0.04  |      |            |   |                       |   |          |   |         |   |            |   |         |   |
| HILICneg_361.0215_5.41 | HILIC | neg        | 5.41            | 361.0215   |            |      | 4        |         | 0.09078                                 | 0.41972 | -0.40 | 0.16   | -0.14 | -0.19 | -0.23                 | -0.57 | 0.64737    | 0.93893 | -0.16   | 0.08  | -0.02    | 0.25  | -0.48                      | -0.48   | -0.18 |      |            |   |                       |   |          |   |         |   |            |   |         |   |
| HILICneg_361.0558_4.95 | HILIC | neg        | 4.95            | 361.0558   |            |      | 4        |         | 0.12014                                 | 0.45565 | -0.39 | -0.21  | 0.30  | -0.25 | -0.50                 | -0.59 | 0.53067    | 0.91225 | -0.18   | -0.20 | -0.14    | 0.03  | -0.13                      | -0.36   | -0.27 |      |            |   |                       |   |          |   |         |   |            |   |         |   |
| RPneg_361.06943_5.593  | RP    | neg        | 5.593           | 361.0694   |            |      | 4        |         | 0.21568                                 | 0.55805 | -0.10 | -0.03  | -0.04 | -0.09 | -0.01                 | -0.13 | 0.38731    | 0.85056 | -0.28   | -0.26 | -0.25    | -0.29 | -0.27                      | -0.32   | -0.32 |      |            |   |                       |   |          |   |         |   |            |   |         |   |
| HILICneg_361.1042_0.46 | HILIC | neg        | 0.46            | 361.1042   |            |      | 4        |         | 0.84555                                 | 0.94211 | 0.21  | 0.54   | 0.43  | 0.11  | 0.29                  | -0.26 | 0.04628    | 0.43117 | 0.79    | 0.89  | 0.82     | 1.30  | 0.78                       | 0.53    | 0.06  |      |            |   |                       |   |          |   |         |   |            |   |         |   |
| HILICneg_361.1253_1.19 | HILIC | neg        | 1.19            | 361.1253   |            |      | 4        |         | 0.61472                                 | 0.83582 | 0.09  | -0.09  | 0.26  | 0.10  | 0.80                  | 0.07  | 0.00313    | 0.11243 | 0.81    | 0.44  | 0.80     | 0.47  | 1.21                       | 0.57    | 0.68  |      |            |   |                       |   |          |   |         |   |            |   |         |   |
| HILICpos_361.1259_5.64 | HILIC | pos        | 5.64            | 361.1259   |            |      | 4        |         | 0.68493                                 | 0.87002 | 0.07  | 0.14   | 0.55  | 0.65  | 0.07                  | -0.30 | 0.00048    | 0.03575 | 0.48    | 0.44  | 0.37     | 0.69  | 0.57                       | 0.52    | -0.31 |      |            |   |                       |   |          |   |         |   |            |   |         |   |
| HILICpos_361.1261_5.8  | HILIC | pos        | 5.8             | 361.1261   |            |      | 4        |         | 0.85085                                 | 0.94392 | 0.12  | 0.54   | 0.75  | 0.35  | 0.03                  | -0.70 | 0.05903    | 0.47684 | 1.02    | 0.84  | 0.77     | 1.21  | 0.64                       | 0.92    | 0.65  |      |            |   |                       |   |          |   |         |   |            |   |         |   |
| RPneg_361.15073_3.683  | RP    | neg        | 3.683           | 361.1507   |            |      | 4        |         | 0.03852                                 | 0.31643 | 0.30  | 0.00   | 0.28  | 0.57  | 0.28                  | -0.71 | 0.42786    | 0.87245 | 0.16    | 0.01  | 0.07     | 0.26  | 0.22                       | 0.28    | -0.31 |      |            |   |                       |   |          |   |         |   |            |   |         |   |
| RPpos_361.167_10.86    | RP    | pos        | 10.86           | 361.1670   |            |      | 4        |         | 0.10777                                 | 0.44127 | 0.57  | 0.22   | 0.28  | 0.02  | 2.05                  | 0.31  | 0.92400    | 0.98905 | -0.01   | -0.30 | 0.83     | -0.31 | -0.38                      | 0.18    | 0.18  |      |            |   |                       |   |          |   |         |   |            |   |         |   |
| RPpos_361.1754_11.73   | RP    | pos        | 11.73           | 361.1754   |            |      | 4        |         | 0.51804                                 | 0.78688 | 0.42  | 0.51   | 0.26  | 0.46  | 0.69                  | -0.39 | 0.13018    | 0.62371 | 0.73    | 0.82  | 0.77     | 0.81  | 0.77                       | 0.43    | -0.06 |      |            |   |                       |   |          |   |         |   |            |   |         |   |
| HILICpos_361.1817_0.63 | HILIC | pos        | 0.63            | 361.1817   |            |      | 4        |         | 0.03056                                 | 0.29493 | -0.51 | -0.24  | -0.12 | 0.09  | -0.46                 | -0.18 | 0.98504    | 0.99776 | -0.01   | -0.09 | -0.04    | -0.45 | 0.77                       | -0.06   | 0.03  |      |            |   |                       |   |          |   |         |   |            |   |         |   |
| RPpos_361.1833_4.61    | RP    | pos        | 4.61            | 361.1833   |            |      | 4        |         | 0.01482                                 | 0.22897 | -0.49 | -0.26  | 0.16  | -0.31 | -0.57                 | -0.06 | 0.73725    | 0.95879 | 0.25    | 0.24  | 0.22     | -0.84 | 0.82                       | 0.04    | -0.05 |      |            |   |                       |   |          |   |         |   |            |   |         |   |
| RPneg_361.20282_9.393  | RP    | neg        | 9.393           | 361.2028   |            |      | 4        |         | 0.42487                                 | 0.72633 | 0.70  | 0.49   | 0.94  | 0.72  | 0.78                  | 1.02  | 0.26345    | 0.77582 | -0.31   | -0.31 | -0.31    | -0.32 | -0.33                      | -0.31   | -0.29 |      |            |   |                       |   |          |   |         |   |            |   |         |   |
| RPneg_361.20474_10.157 | RP    | neg        | 10.157          | 361.2047   |            |      | 4        |         | 0.23831                                 | 0.57997 | -0.28 | -0.23  | -0.14 | -0.12 | 0.00                  | -0.16 | 0.49735    | 0.96072 | 0.02    | 0.21  | 0.25     | -0.20 | -0.38                      | 0.06    | 0.04  |      |            |   |                       |   |          |   |         |   |            |   |         |   |
| RPpos_361.2375_10.39   | RP    | pos        | 10.39           | 361.2375   |            |      | 4        |         | 0.75664                                 | 0.89474 | 0.14  | 0.15   | 0.66  | 0.11  | 0.40                  | -0.33 | 0.80158    | 0.96901 | -0.19   | -0.15 | -0.15    | -0.15 | -0.20                      | -0.54   | -0.27 |      |            |   |                       |   |          |   |         |   |            |   |         |   |
| RPneg_361.2381_9.366   | RP    | neg        | 9.366           | 361.2381   |            |      | 4        |         | 0.13450                                 | 0.47363 | 0.27  | 0.82   | 0.16  | 0.05  | 1.31                  | -0.09 | 0.57721    | 0.93207 | 0.17    | 0.14  | 0.49     | 0.29  | 0.04                       | 0.21    | -0.08 |      |            |   |                       |   |          |   |         |   |            |   |         |   |
| RPpos_361.24_10.97     | RP    | pos        | 10.97           | 361.2400   |            |      | 4        |         | 0.57601                                 | 0.81637 | 0.07  | 1.04   | -0.23 | 0.59  | 0.23                  | 0.15  | 0.10578    | 0.58362 | -0.35   | -0.26 | 0.04     | -0.49 | -0.13                      | -0.36   | -0.37 |      |            |   |                       |   |          |   |         |   |            |   |         |   |
| RPneg_362.09552_10.637 | RP    | neg        | 10.637          | 362.0955   |            |      | 4        |         | 0.07604                                 | 0.39588 | 0.72  | 0.07   | 0.04  | 1.16  | 2.26                  | -0.58 | 0.58635    | 0.92534 | -0.07   | -0.11 | 0.01     | -0.20 | 0.03                       | -0.12   | 0.13  |      |            |   |                       |   |          |   |         |   |            |   |         |   |
| HILICpos_362.1125_4.22 | HILIC | pos        | 4.22            | 362.1125   |            |      | 4        |         | 0.50972                                 | 0.78230 | 0.12  | 0.42   | 1.14  | 0.10  | -0.07                 | -0.39 | 0.00741    | 0.18150 | 0.52    | 0.23  | 0.82     | 1.17  | 0.41                       | 0.10    | -0.50 |      |            |   |                       |   |          |   |         |   |            |   |         |   |
| RPpos_362.1898_10.9    | RP    | pos        | 10.9            | 362.1898   |            |      | 4        |         | 0.00278                                 | 0.10921 | 1.07  | -0.04  | 0.61  | 0.70  | 2.08                  | 0.12  | 0.37815    | 0.84565 | -0.29   | -0.46 | 0.06     | -0.40 | -0.32                      | -0.21   | -0.22 |      |            |   |                       |   |          |   |         |   |            |   |         |   |
| RPpos_362.2222_7.32    | RP    | pos        | 7.32            | 362.2222   |            |      | 4        |         | 0.51100                                 | 0.78290 | -0.17 | -0.36  | 0.52  | -0.08 | -0.30                 | 0.49  | 0.92212    | 0.98881 | -0.02   | 0.09  | 0.13     | 0.30  | -0.13                      | -0.70   | -0.17 |      |            |   |                       |   |          |   |         |   |            |   |         |   |
| RPpos_362.2228_5.84    | RP    | pos        | 5.84            | 362.2228   |            |      | 4        |         | 0.27636                                 | 0.61153 | -0.29 | 0.13   | 0.60  | -0.63 | -0.26                 | 0.35  | 0.01163    | 0.22984 | -0.36   | -0.33 | -0.07    | 0.51  | -0.03                      | -0.09   | -0.54 |      |            |   |                       |   |          |   |         |   |            |   |         |   |
| RPpos_362.2535_9.58    | RP    | pos        | 9.58            | 362.2535   |            |      | 4        |         | 0.36297                                 | 0.68095 | -0.39 | 0.14   | 0.32  | 0.00  | -0.03                 | 0.21  | 0.43013    | 0.87365 | -0.24   | -0.49 | -0.17    | -0.06 | -0.16                      | -0.09   | 0.02  |      |            |   |                       |   |          |   |         |   |            |   |         |   |
| RPpos_362.2689_12.26   | RP    | pos        | 12.26           | 362.2689   |            |      | 4        |         | 0.54197                                 | 0.79896 | -0.16 | 0.42   | 0.25  | -0.22 | 0.36                  | -0.12 | 0.97826    | 0.99726 | -0.04   | 0.01  | 0.44     | -0.20 | 0.17                       | -0.22   | -0.37 |      |            |   |                       |   |          |   |         |   |            |   |         |   |
| RPpos_362.2728_10.81   | RP    | pos        | 10.81           | 362.2728   |            |      | 4        |         | 0.52734                                 | 0.79190 | 0.06  | 1.15   | 0.00  | 0.48  | -0.05                 | 0.29  | 0.00991    | 0.21165 | -0.28   | -0.31 | -0.07    | 0.34  | -0.07                      | -0.15   | -0.33 |      |            |   |                       |   |          |   |         |   |            |   |         |   |
| RPpos_362.3023_11.07   | RP    | pos        | 11.07           | 362.3023   |            |      | 4        |         | 0.17265                                 | 0.51820 | -0.51 | -0.13  | -0.08 | -0.17 | -0.50                 | -0.43 | 0.60274    | 0.92874 | 0.23    | 1.38  | -0.35    | 0.56  | -0.07                      | 0.21    | 0.81  |      |            |   |                       |   |          |   |         |   |            |   |         |   |
| RPpos_362.3389_12      | RP    | pos        | 12              | 362.3389   |            |      | 4        |         | 0.94044                                 | 0.97832 | 0.03  | 0.25   | 0.24  | 0.17  | -0.02                 | -0.69 | 0.55694    | 0.91950 | -0.03   | 0.97  | -0.25    | 0.10  | -0.50                      | 0.05    | 0.16  |      |            |   |                       |   |          |   |         |   |            |   |         |   |
| RPpos_362.             |       |            |                 |            |            |      |          |         |                                         |         |       |        |       |       |                       |       |            |         |         |       |          |       |                            |         |       |      |            |   |                       |   |          |   |         |   |            |   |         |   |

| Feature_ID             | Mode  | Ionization | Average_Rt.min. | Average_Mz | Metabolite | MS/MS       | ID_Level | HMDB_ID | IV-Alcohol self-administration (IV-ASA) |         |       |        |       |       |                       |       |         |         |       |       |       | IV-Alcohol clamp (IV-AC)   |       |       |         |   |   |                       |   |   |   |  |  |  |
|------------------------|-------|------------|-----------------|------------|------------|-------------|----------|---------|-----------------------------------------|---------|-------|--------|-------|-------|-----------------------|-------|---------|---------|-------|-------|-------|----------------------------|-------|-------|---------|---|---|-----------------------|---|---|---|--|--|--|
|                        |       |            |                 |            |            |             |          |         | Area Under the Curve (AUC)              |         |       |        |       |       | IV-Ghrelin or Placebo |       |         |         |       |       |       | Area Under the Curve (AUC) |       |       |         |   |   | IV-Ghrelin or Placebo |   |   |   |  |  |  |
|                        |       |            |                 |            |            |             |          |         | Baseline                                |         |       | IV-ASA |       |       | BRAc=0                |       |         |         |       |       |       | Baseline                   |       |       | Post-LD |   |   | IV-AC                 |   |   |   |  |  |  |
|                        |       |            |                 |            |            |             |          |         | p                                       | q       | d     | d      | d     | d     | d                     | d     | d       | d       | d     | d     | p     | q                          | d     | d     | d       | d | d | d                     | d | d | d |  |  |  |
| RPpos_364.2574_12.41   | RP    | pos        | 12.41           | 364.2574   |            |             | 4        |         | 0.70614                                 | 0.88014 | -0.11 | 0.40   | -0.26 | -0.25 | 0.37                  | 0.13  | 0.05778 | 0.47280 | -0.24 | 0.09  | -0.19 | -0.24                      | -0.28 | -0.20 | -0.39   |   |   |                       |   |   |   |  |  |  |
| RPpos_364.3567_11.71   | RP    | pos        | 11.71           | 364.3567   |            |             | 4        |         | 0.77754                                 | 0.91243 | 0.10  | 0.39   | 0.14  | 0.21  | 0.07                  | -0.59 | 0.13540 | 0.63355 | -0.16 | 0.45  | -0.08 | -0.11                      | -0.53 | -0.06 | -0.03   |   |   |                       |   |   |   |  |  |  |
| HILICneg_364.8426_0.92 | HILIC | neg        | 0.92            | 364.8426   |            |             | 4        |         | 0.14233                                 | 0.48216 | -0.32 | -0.35  | -0.22 | -0.01 | -0.35                 | -0.06 | 0.29191 | 0.79623 | -0.27 | -0.28 | -0.25 | -0.37                      | -0.21 | -0.25 | 0.19    |   |   |                       |   |   |   |  |  |  |
| HILICneg_364.8692_3.14 | HILIC | neg        | 3.14            | 364.8692   |            |             | 4        |         | 0.02743                                 | 0.28442 | -0.61 | -0.19  | -0.84 | 0.13  | 0.20                  | 0.97  | 0.92851 | 0.98959 | -0.03 | -0.32 | -0.31 | -0.33                      | -0.23 | -0.21 | 0.37    |   |   |                       |   |   |   |  |  |  |
| HILICneg_364.9283_5.41 | HILIC | neg        | 5.41            | 364.9283   |            |             | 4        |         | 0.42548                                 | 0.72691 | -0.20 | 0.45   | -0.17 | -0.19 | 0.70                  | 0.16  | 0.32753 | 0.81179 | 0.02  | -0.21 | 0.01  | 0.49                       | 0.38  | 0.24  | -0.88   |   |   |                       |   |   |   |  |  |  |
| RPneg_365.0336_6.66    | RP    | neg        | 6.66            | 365.0336   |            |             | 4        |         | 0.06408                                 | 0.37245 | 0.45  | 0.07   | 0.90  | 0.89  | 0.07                  | 0.37  | 0.01760 | 0.28428 | 0.44  | 0.23  | 1.89  | 3.42                       | 2.88  | 3.77  | 1.77    |   |   |                       |   |   |   |  |  |  |
| RPpos_365.0426_3.58    | RP    | pos        | 3.58            | 365.0426   |            |             | 4        |         | 0.00694                                 | 0.16431 | 0.53  | 0.60   | 0.63  | 0.43  | 0.59                  | 0.89  | 0.45009 | 0.88150 | 0.29  | -0.07 | 0.27  | 0.23                       | 0.26  | 0.71  | 0.46    |   |   |                       |   |   |   |  |  |  |
| HILICneg_365.0611_0.87 | HILIC | neg        | 0.87            | 365.0611   |            |             | 4        |         | 0.33384                                 | 0.65756 | 0.27  | 0.18   | 1.22  | 0.83  | -0.18                 | -0.38 | 0.17487 | 0.68956 | 0.44  | -0.14 | 0.36  | 0.42                       | 0.56  | 0.61  | -0.20   |   |   |                       |   |   |   |  |  |  |
| HILICneg_365.0726_1.34 | HILIC | neg        | 1.34            | 365.0726   |            |             | 4        |         | 0.72984                                 | 0.88997 | 0.09  | -0.11  | 0.91  | 0.37  | 0.23                  | 0.20  | 0.15535 | 0.66179 | 0.33  | 0.34  | -0.02 | -0.19                      | 0.45  | 0.82  | 0.27    |   |   |                       |   |   |   |  |  |  |
| HILICneg_365.1057_6.41 | HILIC | neg        | 6.41            | 365.1057   |            |             | 4        |         | 0.01600                                 | 0.23429 | -0.49 | -0.10  | -0.28 | -0.45 | -0.34                 | -0.49 | 0.01909 | 0.29300 | -0.67 | -0.68 | -0.59 | -0.31                      | -0.68 | -0.84 | -0.20   |   |   |                       |   |   |   |  |  |  |
| HILICneg_365.12_5.26   | HILIC | neg        | 5.26            | 365.1200   |            |             | 4        |         | 0.40220                                 | 0.71023 | 0.23  | -0.40  | -0.13 | -0.22 | 1.50                  | 0.54  | 0.10081 | 0.57282 | 1.37  | -0.05 | 0.61  | 1.47                       | 0.89  | 1.27  | 1.55    |   |   |                       |   |   |   |  |  |  |
| RPneg_365.1355_1.951   | RP    | neg        | 1.951           | 365.1355   |            |             | 4        |         | 0.48014                                 | 0.76412 | -0.23 | 0.38   | 0.25  | 0.06  | 0.03                  | -0.61 | 0.09110 | 0.55601 | -0.42 | -0.26 | -0.38 | -0.53                      | -0.33 | -0.53 | -0.44   |   |   |                       |   |   |   |  |  |  |
| HILICneg_365.1429_0.55 | HILIC | neg        | 0.55            | 365.1429   |            |             | 4        |         | 0.76035                                 | 0.90500 | 0.09  | 0.17   | 0.18  | 0.12  | 0.16                  | 0.28  | 0.32737 | 0.81922 | 0.13  | 0.11  | 0.25  | 0.15                       | -0.01 | 0.18  | -0.04   |   |   |                       |   |   |   |  |  |  |
| RPneg_365.14322_6.829  | RP    | neg        | 6.829           | 365.1432   |            |             | 4        |         | 0.83321                                 | 0.93727 | 0.14  | 0.16   | 0.27  | 0.17  | 0.35                  | 0.06  | 0.40874 | 0.86241 | 0.10  | 0.13  | 0.10  | 0.10                       | 0.12  | 0.11  | 0.01    |   |   |                       |   |   |   |  |  |  |
| HILICpos_365.1569_0.62 | HILIC | pos        | 0.62            | 365.1569   |            |             | 4        |         | 0.52548                                 | 0.79084 | -0.25 | -0.38  | 0.02  | 0.34  | -0.07                 | 0.04  | 0.62022 | 0.93310 | 0.11  | 0.05  | 0.16  | -0.24                      | 0.32  | 0.10  | 0.01    |   |   |                       |   |   |   |  |  |  |
| RPpos_365.1982_11.3    | RP    | pos        | 11.3            | 365.1982   |            |             | 4        |         | 0.00259                                 | 0.10455 | 1.04  | -0.03  | 0.24  | 0.78  | 2.45                  | 0.14  | 0.94518 | 0.99218 | -0.02 | -0.27 | 0.68  | -0.21                      | 0.01  | -0.15 | 0.05    |   |   |                       |   |   |   |  |  |  |
| RPpos_365.2_10.9       | RP    | pos        | 10.9            | 365.2000   |            |             | 4        |         | 0.00521                                 | 0.14263 | 1.01  | -0.05  | 0.59  | 0.90  | 2.02                  | 0.03  | 0.73780 | 0.95893 | -0.14 | -0.46 | 0.31  | -0.27                      | -0.12 | -0.22 | -0.04   |   |   |                       |   |   |   |  |  |  |
| RPpos_365.2327_7       | RP    | pos        | 7               | 365.2320   |            |             | 4        |         | 0.12556                                 | 0.47045 | 0.47  | -0.03  | 0.38  | 0.66  | 1.19                  | 0.59  | 0.64310 | 0.93733 | 0.15  | -0.37 | -0.31 | -0.27                      | 0.46  | 0.57  | 0.15    |   |   |                       |   |   |   |  |  |  |
| RPpos_365.2329_6.6     | RP    | pos        | 6.6             | 365.2329   |            |             | 4        |         | 0.00099                                 | 0.06411 | 0.22  | 0.22   | 1.21  | 1.36  | 2.77                  | -0.28 | 0.00003 | 0.00056 | 1.59  | 0.28  | 0.70  | 1.48                       | 2.16  | 2.16  | -0.02   |   |   |                       |   |   |   |  |  |  |
| RPpos_365.233_6.86     | RP    | pos        | 6.86            | 365.2330   |            |             | 4        |         | 0.00002                                 | 0.00685 | 1.48  | 0.21   | 1.53  | 1.49  | 2.89                  | 0.57  | 0.00000 | 0.00013 | 1.36  | 0.00  | -0.12 | 0.90                       | 2.56  | 2.38  | 0.60    |   |   |                       |   |   |   |  |  |  |
| RPpos_365.3025_11.18   | RP    | pos        | 11.18           | 365.3025   |            | no autoMSMS | 4        |         | 0.00189                                 | 0.08764 | 1.60  | 0.24   | 0.48  | 1.14  | 3.33                  | -0.13 | 0.82231 | 0.97319 | 0.01  | -0.18 | 0.18  | 0.00                       | 0.20  | -0.08 | -0.04   |   |   |                       |   |   |   |  |  |  |
| RPneg_365.93942_2.635  | RP    | neg        | 2.635           | 365.9394   |            |             | 4        |         | 0.01522                                 | 0.23217 | 0.38  | 0.48   | 0.42  | 0.44  | 0.53                  | 0.53  | 0.65928 | 0.94207 | 0.06  | -0.03 | 0.06  | 0.08                       | -0.05 | -0.01 | 0.76    |   |   |                       |   |   |   |  |  |  |
| HILICneg_366.0181_0.94 | HILIC | pos        | 0.94            | 366.0181   |            |             | 4        |         | 0.35851                                 | 0.67753 | 0.14  | 0.17   | 0.17  | 0.51  | 0.27                  | -0.16 | 0.01125 | 0.22564 | -0.35 | -0.37 | -0.49 | -0.22                      | -0.23 | -0.32 | -0.45   |   |   |                       |   |   |   |  |  |  |
| RPneg_366.10129_6.325  | RP    | neg        | 6.325           | 366.1013   |            |             | 4        |         | 0.84994                                 | 0.94363 | 0.20  | 0.20   | 0.59  | 0.40  | 0.25                  | -0.66 | 0.02689 | 0.34456 | 1.77  | 1.59  | 1.85  | 1.82                       | 1.64  | 1.64  | 1.86    |   |   |                       |   |   |   |  |  |  |
| RPneg_366.10153_6.125  | RP    | neg        | 6.125           | 366.1015   |            |             | 4        |         | 0.70571                                 | 0.87977 | 0.11  | 0.08   | 0.37  | 0.30  | 0.27                  | -0.62 | 0.05658 | 0.46911 | 1.89  | 2.33  | 2.12  | 2.06                       | 1.82  | 1.73  | 1.75    |   |   |                       |   |   |   |  |  |  |
| RPpos_366.1848_10.9    | RP    | pos        | 10.9            | 366.1848   |            |             | 4        |         | 0.00400                                 | 0.12882 | 0.99  | -0.06  | 0.58  | 1.02  | 1.93                  | -0.04 | 0.71249 | 0.95351 | -0.15 | -0.41 | 0.29  | -0.31                      | -0.12 | -0.24 | -0.07   |   |   |                       |   |   |   |  |  |  |
| RPpos_366.1865_10.57   | RP    | pos        | 10.57           | 366.1865   |            |             | 4        |         | 0.07137                                 | 0.38701 | 0.40  | 1.29   | 0.09  | 0.63  | 0.21                  | 1.11  | 0.20707 | 0.72378 | -0.20 | -0.10 | 0.02  | 0.27                       | -0.23 | -0.24 | -0.32   |   |   |                       |   |   |   |  |  |  |
| RPpos_366.2052_11.17   | RP    | pos        | 11.17           | 366.2052   |            |             | 4        |         | 0.00301                                 | 0.11311 | 1.14  | -0.17  | 0.62  | 0.94  | 2.06                  | -0.06 | 0.95747 | 0.99479 | -0.05 | -0.37 | 0.33  | -0.14                      | 0.03  | -0.15 | 0.09    |   |   |                       |   |   |   |  |  |  |
| HILICpos_366.238_1     | HILIC | pos        | 1               | 366.2380   |            |             | 4        |         | 0.18190                                 | 0.52784 | 0.30  | 0.17   | 1.18  | 0.76  | 0.43                  | 0.90  | 0.20219 | 0.71842 | 0.17  | -0.29 | 0.37  | 0.36                       | 0.39  | 0.34  | -0.40   |   |   |                       |   |   |   |  |  |  |
| HILICpos_366.2381_1.11 | HILIC | pos        | 1.11            | 366.2381   |            |             | 4        |         | 0.70171                                 | 0.87816 | -0.16 | 0.28   | 0.56  | -0.04 | -0.07                 | 0.62  | 0.12459 | 0.61515 | -0.20 | -0.23 | -0.09 | -0.27                      | -0.03 | -0.01 | -0.37   |   |   |                       |   |   |   |  |  |  |
| HILICpos_366.2384_0.85 | HILIC | pos        | 0.85            | 366.2384   |            |             | 4        |         | 0.69076                                 | 0.87288 | -0.16 | 0.35   | 0.88  | -0.11 | 0.02                  | 0.45  | 0.02854 | 0.35230 | -0.27 | -0.34 | -0.10 | -0.32                      | 0.00  | -0.01 | -0.60   |   |   |                       |   |   |   |  |  |  |
| RPpos_366.265_10.42    | RP    | pos        | 10.42           | 366.2650   |            |             | 4        |         | 0.25390                                 | 0.59219 | 0.33  | 0.51   | 0.32  | 0.26  | 0.49                  | 0.21  | 0.58231 | 0.92442 | 0.95  | 0.18  | 0.29  | -0.54                      | -0.18 | 0.91  | 0.41    |   |   |                       |   |   |   |  |  |  |
| HILICpos_366.264_0.65  | HILIC | pos        | 0.65            | 366.2647   |            |             | 4        |         | 0.09617                                 | 0.62714 | 0.36  | 0.10   | 0.53  | 0.30  | 0.67                  | 0.35  | 0.17240 | 0.68579 | 0.35  | 0.65  | 0.54  | 0.26                       | 0.09  | 0.26  | 0.68    |   |   |                       |   |   |   |  |  |  |
| HILICneg_366.3004_0.4  | HILIC | pos        | 0.4             | 366.3004   |            |             | 4        |         | 0.87611                                 | 0.95355 | -0.08 | 0.17   | 0.64  | 0.07  | -0.32                 | -0.24 | 0.84419 | 0.99197 | 0.00  | 0.26  | -0.16 | 0.66                       | -0.54 | 0.48  | -0.50   |   |   |                       |   |   |   |  |  |  |
| RPpos_366.373_12.06    | RP    | pos        | 12.06           | 366.3730   |            |             | 4        |         | 0.78209                                 | 0.91454 | 0.09  | 0.40   | 0.14  | 0.18  | 0.19                  | -0.69 | 0.44013 | 0.87851 | -0.02 | 0.69  | 0.02  | 0.02                       | -0.47 | 0.02  | 0.05    |   |   |                       |   |   |   |  |  |  |
| RPpos_366.7035_5.7     | RP    | pos        | 5.7             | 366.7035   |            |             | 4        |         | 0.23177                                 | 0.57324 | 0.31  | -0.05  | 0.37  | 0.65  | 0.31                  | 0.47  | 0.93370 | 0.98984 | 0.00  | -0.36 | 0.27  | 0.00                       | 0.07  | -0.47 | 0.17    |   |   |                       |   |   |   |  |  |  |
| HILICneg_366.8843_0.53 | HILIC | neg        | 0.53            | 366.8843   |            |             | 4        |         | 0.01194                                 | 0.20944 | -0.70 | -0.69  | -0.67 | -0.37 | -0.23                 | -0.28 | 0.54197 | 0.91464 | -0.05 | 0.42  | -0.09 | -0.08                      | 0.24  | -0.37 | -0.08   |   |   |                       |   |   |   |  |  |  |
| RPneg_366.90042_8.601  | RP    | neg        | 8.601           | 366.9004   |            |             | 4        |         | 0.59841                                 | 0.82782 | -0.20 | -0.17  | -0.15 | -0.15 | -0.16                 | -0.36 | 0.62433 | 0.93371 | 1.20  | 1.20  | 1.18  | 1.12                       | 1.24  | 1.24  | 1.27    |   |   |                       |   |   |   |  |  |  |
| HILICneg_366.9009_0.39 | HILIC | neg        | 0.39            | 366.9009   |            |             | 4        |         | 0.52315                                 | 0.78939 | -0.20 | -0.17  | -0.14 | -0.14 | -0.16                 | -0.37 | 0.64695 | 0.93869 | 1.22  | 1.31  | 1.26  | 1.12                       | 1.18  | 1.32  | 1.17    |   |   |                       |   |   |   |  |  |  |
| RPneg_367.01254_5.392  | RP    | neg        | 5.392           | 367.0125   |            |             | 4        |         | 0.42759                                 | 0.72875 | 0.12  | 0.07   | 0.41  | 0.38  | -0.14                 | -0.11 | 0.90886 | 0.98698 | -0.04 | -0.24 | -0.12 | 0.09                       | 0.10  | 0.06  | -0.02   |   |   |                       |   |   |   |  |  |  |
| HILICneg_367.0373_0.66 | HILIC | neg        | 0.66            | 367.0373   |            |             | 4        |         | 0.51450                                 | 0.78469 | 0.10  | -0.04  | 0.62  | 0.52  | -0.25                 | 0.96  | 0.34568 | 0.82882 | 0.08  | -0.05 | 0.13  | 0.10                       | -0.01 | 0.34  | -0.13   |   |   |                       |   |   |   |  |  |  |
| RPneg_367.04944_8.767  | RP    | neg        | 8.767           | 367.0494   |            |             | 4        |         | 0.59915                                 | 0.82804 | -0.09 | -0.14  | -0.07 | -0.07 | -0.17                 | 0.05  | 0.16939 | 0.68171 | 0.17  | 0.23  | 0.19  | 0.12                       | 0.08  | 0.14  | 0.34    |   |   |                       |   |   |   |  |  |  |
| HILICneg_367.0742_5.62 | HILIC | neg        | 5.62            | 367.0742   |            |             | 4        |         | 0.36247                                 | 0.68067 | -0.21 | -0.10  | 0.06  | -0.13 | -0.25                 | -0.06 | 0.03479 | 0.38170 | -0.14 | -0.11 | 0.06  | 0.12                       | -0.23 | -0.27 | -0.50   |   |   |                       |   |   |   |  |  |  |
| HILICneg_367.0874_1.25 | HILIC | neg        | 1.25            | 367.0874   |            |             | 4        |         | 0.59376                                 | 0.82595 | 0.12  | -0.15  | 0.35  | 0.18  | 0.51                  | 0.42  | 0.66470 | 0.94321 | 0.07  | -0.15 | -0.15 | 0.17                       | 0.00  | 0.08  | 0.72    |   |   |                       |   |   |   |  |  |  |
| HILICneg_367.1061_0.57 | HILIC | neg        | 0.57            | 367.1061   |            |             | 4        |         | 0.29562                                 | 0.62685 | 0.42  | 0.61   | 0.60  | 0.27  | 0.62                  | 0.08  | 0.05808 | 0.47410 | 1.30  | 1.26  | 1.16  | 1.45                       | 0.72  | 1.28  | 0.47    |   |   |                       |   |   |   |  |  |  |
| HILICpos_367.1151_5.64 | HILIC | pos        | 5.64            | 367.1151   |            |             | 4        |         | 0.50016                                 | 0.77625 | 0.14  | 0.26   | 0.41  | 0.58  | 0.18                  | 0.20  | 0.08499 | 0.54143 | -0.45 | 0.86  | 0.42  | 0.28                       | 0.46  | 0.37  | -0.36   |   |   |                       |   |   |   |  |  |  |
| HILICneg_367.1156_5.92 | HILIC | neg        | 5.92            | 367.1156   |            |             | 4        |         | 0.45882                                 | 0.75029 | -0.13 | -0.06  | 0.53  | 0.07  | -0.24                 | 0.32  | 0.07436 | 0.51711 | 0.67  | 0.94  | 0.82  | 0.54                       | 0.36  | 0.69  | -0.90   |   |   |                       |   |   |   |  |  |  |
| RPneg_367.15796_7.821  | RP    | neg        | 7.821           | 367.1580   |            |             | 4        |         | 0.12128                                 | 0.45664 | -0.11 | -0.05  | 0.10  | -0.02 | 0.12                  | -0.48 | 0.25237 | 0.76813 | 0.30  | 0.23  | 0.24  | 0.29                       | 0.38  | 0.34  | 0.28    |   |   |                       |   |   |   |  |  |  |
| RPneg_367.15796_9.053  | RP    | neg        | 9.053           | 367.1580   |            |             | 4        |         | 0.55231                                 | 0.80506 | 0.35  | 0.45   | -0.25 | 1.31  | 0.25                  | -0.32 | 0.11227 | 0.59517 | 1.83  | -0.02 | 1.79  | 0.15                       | 4.79  | 1.91  | 0.13    |   |   |                       |   |   |   |  |  |  |
| RPneg_367.15802_10.98  | RP    | neg        |                 |            |            |             |          |         |                                         |         |       |        |       |       |                       |       |         |         |       |       |       |                            |       |       |         |   |   |                       |   |   |   |  |  |  |



|                        |       |            |                 |            |            |      |          |         |                            |         | IV-Alcohol self-administration (IV-ASA) |        |       |       |        |       |         |                            |       |       |          | IV-Alcohol clamp (IV-AC) |       |         |       |       |                       |   |   |       |   |   |         |   |   |        |   |   |   |   |   |   |   |   |  |  |  |  |
|------------------------|-------|------------|-----------------|------------|------------|------|----------|---------|----------------------------|---------|-----------------------------------------|--------|-------|-------|--------|-------|---------|----------------------------|-------|-------|----------|--------------------------|-------|---------|-------|-------|-----------------------|---|---|-------|---|---|---------|---|---|--------|---|---|---|---|---|---|---|---|--|--|--|--|
| Feature_ID             | Mode  | Ionization | Average_Rt.min. | Average_Mz | Metabolite | MSMS | ID_Level | HMDB_ID | Area Under the Curve (AUC) |         |                                         |        |       |       |        |       |         | Baseline                   |       |       |          |                          |       |         |       |       | Post-LD               |   |   |       |   |   |         |   |   |        |   |   |   |   |   |   |   |   |  |  |  |  |
|                        |       |            |                 |            |            |      |          |         | IV-Ghrelin or Placebo      |         |                                         | IV-ASA |       |       | BtAc=0 |       |         | Area Under the Curve (AUC) |       |       | Baseline |                          |       | Post-LD |       |       | IV-Ghrelin or Placebo |   |   | IV-AC |   |   | Post-AC |   |   | BtAc=0 |   |   |   |   |   |   |   |   |  |  |  |  |
|                        |       |            |                 |            |            |      |          |         | p                          | q       | d                                       | p      | q     | d     | p      | q     | d       | p                          | q     | d     | p        | q                        | d     | p       | q     | d     | p                     | q | d | p     | q | d | p       | q | d | p      | q | d | p | q | d | p | q | d |  |  |  |  |
| RPneg_368.31662_10.96  | RP    | neg        | 10.96           | 368.3166   |            |      | 4        |         | 0.92742                    | 0.97412 | 0.04                                    | 0.09   | 0.28  | 0.01  | 0.49   | -0.41 | 0.00079 | 0.04917                    | 1.48  | 1.42  | 1.48     | 1.30                     | 1.64  | 1.34    | 0.71  |       |                       |   |   |       |   |   |         |   |   |        |   |   |   |   |   |   |   |   |  |  |  |  |
| RPos_368.3886_12.59    | RP    | pos        | 12.59           | 368.3886   |            |      | 4        |         | 0.94060                    | 0.97832 | 0.03                                    | 0.10   | 0.15  | 0.25  | 0.19   | -0.69 | 0.95732 | 0.99475                    | -0.19 | 1.98  | -0.30    | 0.22                     | -0.42 | 0.19    | 0.42  |       |                       |   |   |       |   |   |         |   |   |        |   |   |   |   |   |   |   |   |  |  |  |  |
| RPos_368.738_6.88      | RP    | pos        | 6.88            | 368.7380   |            |      | 4        |         | 0.97660                    | 0.99092 | -0.01                                   | 0.34   | 0.39  | 0.43  | -0.06  | -0.99 | 0.84958 | 0.97748                    | -0.10 | -0.18 | 0.18     | 0.21                     | 0.01  | 0.00    | -0.67 | -0.22 |                       |   |   |       |   |   |         |   |   |        |   |   |   |   |   |   |   |   |  |  |  |  |
| RPos_368.7383_7.24     | RP    | pos        | 7.24            | 368.7383   |            |      | 4        |         | 0.98517                    | 0.82142 | -0.16                                   | -0.29  | 0.37  | -0.01 | -0.31  | 0.37  | 0.81888 | 0.97238                    | 0.02  | 0.02  | 0.33     | 0.07                     | -0.06 | -0.60   | -0.20 |       |                       |   |   |       |   |   |         |   |   |        |   |   |   |   |   |   |   |   |  |  |  |  |
| RPneg_368.89691_8.601  | RP    | neg        | 8.601           | 368.8969   |            |      | 4        |         | 0.56855                    | 0.91331 | -0.20                                   | -0.17  | -0.14 | -0.15 | -0.16  | -0.36 | 0.58350 | 0.92445                    | 1.72  | 1.20  | 0.24     | 1.16                     | 1.26  | 1.23    | 1.74  |       |                       |   |   |       |   |   |         |   |   |        |   |   |   |   |   |   |   |   |  |  |  |  |
| HILICneg_368.8972_0.39 | HILIC | neg        | 0.39            | 368.8972   |            |      | 4        |         | 0.53181                    | 0.79421 | -0.23                                   | -0.11  | -0.14 | -0.14 | -0.12  | -0.17 | 0.63570 | 0.82423                    | 1.32  | 2.42  | 1.32     | 1.24                     | 1.11  | 0.21    | -1.17 |       |                       |   |   |       |   |   |         |   |   |        |   |   |   |   |   |   |   |   |  |  |  |  |
| HILICneg_368.966_4.33  | HILIC | neg        | 4.33            | 368.9660   |            |      | 4        |         | 0.32918                    | 0.65340 | -0.08                                   | 0.10   | 0.19  | -0.20 | 0.07   | -0.07 | 0.01782 | 0.28545                    | 0.24  | 0.36  | 0.28     | 0.11                     | 0.41  | 0.11    | -0.02 |       |                       |   |   |       |   |   |         |   |   |        |   |   |   |   |   |   |   |   |  |  |  |  |
| HILICneg_368.9715_0.49 | HILIC | neg        | 0.49            | 368.9715   |            |      | 4        |         | 0.88061                    | 0.95563 | -0.01                                   | -0.10  | 0.03  | -0.05 | 0.28   | -0.04 | 0.31914 | 0.81500                    | 0.38  | 0.40  | 0.24     | 0.57                     | 0.16  | 0.41    | 0.27  |       |                       |   |   |       |   |   |         |   |   |        |   |   |   |   |   |   |   |   |  |  |  |  |
| RPneg_368.97195_2.431  | RP    | neg        | 2.431           | 368.9720   |            |      | 4        |         | 0.97575                    | 0.99063 | -0.04                                   | 0.00   | -0.01 | -0.10 | 0.01   | 0.21  | 0.13755 | 0.63663                    | 0.55  | 0.49  | 0.70     | 0.51                     | 0.56  | 0.36    | 0.80  |       |                       |   |   |       |   |   |         |   |   |        |   |   |   |   |   |   |   |   |  |  |  |  |
| RPneg_368.97607_8.604  | RP    | neg        | 8.604           | 368.9761   |            |      | 4        |         | 0.49930                    | 0.77600 | -0.21                                   | 0.01   | 0.11  | -0.17 | 0.05   | -0.29 | 0.16571 | 0.67711                    | 0.15  | 0.18  | 0.24     | 0.12                     | 0.21  | 0.11    | 0.08  |       |                       |   |   |       |   |   |         |   |   |        |   |   |   |   |   |   |   |   |  |  |  |  |
| HILICneg_368.9764_0.42 | HILIC | neg        | 0.42            | 368.9764   |            |      | 4        |         | 0.48517                    | 0.76764 | -0.21                                   | 0.03   | 0.08  | -0.23 | 0.03   | -0.23 | 0.22840 | 0.74521                    | 0.12  | 0.08  | 0.25     | 0.07                     | 0.12  | 0.12    | 0.06  |       |                       |   |   |       |   |   |         |   |   |        |   |   |   |   |   |   |   |   |  |  |  |  |
| RPos_369.0134_1.69     | RP    | pos        | 1.69            | 369.0134   |            |      | 4        |         | 0.04826                    | 0.34231 | -0.34                                   | 0.00   | -0.17 | -0.29 | -0.25  | -0.49 | 0.86181 | 0.97982                    | -0.08 | 0.03  | 0.20     | -0.13                    | -0.06 | -0.41   | 0.52  |       |                       |   |   |       |   |   |         |   |   |        |   |   |   |   |   |   |   |   |  |  |  |  |
| HILICneg_369.0331_0.66 | HILIC | neg        | 0.66            | 369.0331   |            |      | 4        |         | 0.29295                    | 0.62497 | 0.13                                    | -0.02  | 0.60  | 0.54  | -0.25  | 0.86  | 0.40052 | 0.85821                    | 0.07  | -0.22 | 0.06     | 0.33                     | -0.24 | 0.35    | -0.18 |       |                       |   |   |       |   |   |         |   |   |        |   |   |   |   |   |   |   |   |  |  |  |  |
| HILICneg_369.0672_5.96 | HILIC | neg        | 5.96            | 369.0672   |            |      | 4        |         | 0.45596                    | 0.74813 | -0.16                                   | -0.05  | 0.06  | -0.11 | 0.00   | -0.57 | 0.46617 | 0.88791                    | 0.22  | 0.23  | 0.28     | 0.23                     | 0.63  | -0.16   | 0.36  |       |                       |   |   |       |   |   |         |   |   |        |   |   |   |   |   |   |   |   |  |  |  |  |
| HILICneg_369.0683_5.69 | HILIC | neg        | 5.69            | 369.0683   |            |      | 4        |         | 0.96193                    | 0.98629 | 0.01                                    | -0.09  | 0.24  | 0.24  | 0.06   | -0.12 | 0.12532 | 0.61687                    | 0.49  | 0.69  | 0.88     | 0.42                     | 0.60  | 0.20    | 0.15  |       |                       |   |   |       |   |   |         |   |   |        |   |   |   |   |   |   |   |   |  |  |  |  |
| HILICneg_369.0992_1.78 | HILIC | neg        | 1.78            | 369.0992   |            |      | 4        |         | 0.70131                    | 0.87812 | -0.17                                   | -0.37  | -0.07 | -0.38 | 0.22   | 0.18  | 0.21502 | 0.73154                    | 0.69  | 0.32  | 0.30     | 0.95                     | 0.09  | 1.22    | 0.66  |       |                       |   |   |       |   |   |         |   |   |        |   |   |   |   |   |   |   |   |  |  |  |  |
| RPneg_369.11862_6.005  | RP    | neg        | 6.005           | 369.1186   |            |      | 4        |         | 0.11807                    | 0.45380 | 0.74                                    | 0.29   | 1.32  | 1.34  | 0.46   | -0.45 | 0.63401 | 0.93546                    | 0.22  | -0.01 | 0.15     | 0.22                     | 0.37  | 0.32    | -0.05 |       |                       |   |   |       |   |   |         |   |   |        |   |   |   |   |   |   |   |   |  |  |  |  |
| HILICpos_369.1295_5.79 | HILIC | pos        | 5.79            | 369.1295   |            |      | 4        |         | 0.13463                    | 0.65812 | 0.18                                    | 0.24   | 0.45  | 0.36  | 0.27   | 0.03  | 0.03608 | 0.36580                    | 0.21  | 0.37  | 0.49     | 0.29                     | 0.08  | -0.02   | -0.22 |       |                       |   |   |       |   |   |         |   |   |        |   |   |   |   |   |   |   |   |  |  |  |  |
| RPneg_369.13708_10.757 | RP    | neg        | 10.757          | 369.1371   |            |      | 4        |         | 0.00575                    | 0.14816 | 0.59                                    | 0.03   | 0.22  | 0.62  | 0.77   | -0.11 | 0.62764 | 0.93475                    | -0.12 | 0.04  | 0.88     | -0.22                    | -0.24 | 0.11    | -0.13 |       |                       |   |   |       |   |   |         |   |   |        |   |   |   |   |   |   |   |   |  |  |  |  |
| RPos_369.1515_6.33     | RP    | pos        | 6.33            | 369.1515   |            |      | 4        |         | 0.63383                    | 0.84465 | 0.14                                    | 0.11   | -0.89 | 0.42  | 0.73   | -0.13 | 0.64072 | 0.93638                    | -0.17 | 0.50  | 0.09     | -0.28                    | -0.07 | -0.74   | -1.74 |       |                       |   |   |       |   |   |         |   |   |        |   |   |   |   |   |   |   |   |  |  |  |  |
| RPos_369.1528_6.24     | RP    | pos        | 6.24            | 369.1528   |            |      | 4        |         | 0.01515                    | 0.23190 | 0.31                                    | 0.00   | 0.48  | 0.75  | 0.08   | -0.88 | 0.80604 | 0.97022                    | -0.07 | -0.19 | -0.08    | 0.04                     | -0.01 | -0.05   | -0.25 |       |                       |   |   |       |   |   |         |   |   |        |   |   |   |   |   |   |   |   |  |  |  |  |
| RPneg_369.15402_7.429  | RP    | neg        | 7.429           | 369.1540   |            |      | 4        |         | 0.63228                    | 0.84427 | 0.08                                    | 0.02   | 0.23  | 0.25  | 0.32   | 0.20  | 0.02769 | 0.34840                    | 0.09  | -0.06 | 0.09     | 0.03                     | 0.24  | 0.18    | -0.08 |       |                       |   |   |       |   |   |         |   |   |        |   |   |   |   |   |   |   |   |  |  |  |  |
| RPneg_369.15472_7.823  | RP    | neg        | 7.823           | 369.1547   |            |      | 4        |         | 0.10121                    | 0.43354 | -0.10                                   | -0.06  | 0.05  | 0.02  | 0.25   | -0.44 | 0.02407 | 0.32699                    | 0.50  | 0.22  | 0.63     | 0.39                     | 0.66  | 0.56    | 0.42  |       |                       |   |   |       |   |   |         |   |   |        |   |   |   |   |   |   |   |   |  |  |  |  |
| RPneg_369.17297_6.992  | RP    | neg        | 6.992           | 369.1730   |            |      | 4        |         | 0.02289                    | 0.26488 | -0.28                                   | -0.03  | -0.28 | -0.39 | -0.17  | 0.04  | 0.33874 | 0.82468                    | -0.22 | -0.07 | -0.02    | -0.12                    | -0.16 | -0.28   | -0.32 |       |                       |   |   |       |   |   |         |   |   |        |   |   |   |   |   |   |   |   |  |  |  |  |
| RPneg_369.17328_8.17   | RP    | neg        | 8.17            | 369.1733   |            |      | 4        |         | 0.51453                    | 0.78469 | -0.06                                   | -0.07  | 0.05  | -0.05 | 0.04   | 0.03  | 0.82416 | 0.97347                    | 0.02  | 0.00  | 0.01     | 0.01                     | 0.05  | 0.05    | 0.03  |       |                       |   |   |       |   |   |         |   |   |        |   |   |   |   |   |   |   |   |  |  |  |  |
| RPneg_369.17337_11.315 | RP    | neg        | 11.315          | 369.1734   |            |      | 4        |         | 0.15206                    | 0.49491 | -0.28                                   | -0.35  | -0.09 | 0.29  | 0.06   | -0.16 | 0.85385 | 0.97811                    | 0.05  | 0.02  | -0.04    | -0.43                    | 0.03  | 0.22    | 0.72  |       |                       |   |   |       |   |   |         |   |   |        |   |   |   |   |   |   |   |   |  |  |  |  |
| HILICneg_369.1734_0.53 | HILIC | neg        | 0.53            | 369.1734   |            |      | 4        |         | 0.56789                    | 0.81298 | -0.05                                   | -0.03  | 0.14  | -0.03 | 0.02   | -0.04 | 0.80198 | 0.96981                    | 0.05  | 0.06  | 0.04     | 0.01                     | 0.11  | 0.05    | 0.06  |       |                       |   |   |       |   |   |         |   |   |        |   |   |   |   |   |   |   |   |  |  |  |  |
| RPneg_369.17361_11.247 | RP    | neg        | 11.247          | 369.1736   |            |      | 4        |         | 0.97317                    | 0.99003 | -0.02                                   | 0.55   | -0.63 | 0.58  | 0.94   | 0.17  | 0.28177 | 0.79060                    | -0.22 | -0.16 | -0.31    | -0.13                    | -0.25 | 0.09    | 0.30  |       |                       |   |   |       |   |   |         |   |   |        |   |   |   |   |   |   |   |   |  |  |  |  |
| RPneg_369.17377_8.633  | RP    | neg        | 8.633           | 369.1738   |            |      | 4        |         | 0.30220                    | 0.63148 | 3.16                                    | 0.14   | 0.32  | 5.08  | 6.04   | 0.02  | 0.37155 | 0.84141                    | 0.52  | -0.29 | 7.12     | 6.36                     | -0.57 | -0.03   | -0.20 |       |                       |   |   |       |   |   |         |   |   |        |   |   |   |   |   |   |   |   |  |  |  |  |
| RPneg_369.17398_8.761  | RP    | neg        | 8.761           | 369.1740   |            |      | 4        |         | 0.61987                    | 0.83867 | 0.04                                    | 0.09   | 0.13  | 0.02  | 0.15   | 0.17  | 0.84581 | 0.97710                    | -0.04 | -0.05 | -0.05    | -0.04                    | -0.01 | -0.04   | -0.02 |       |                       |   |   |       |   |   |         |   |   |        |   |   |   |   |   |   |   |   |  |  |  |  |
| RPneg_369.17401_8.082  | RP    | neg        | 8.082           | 369.1740   |            |      | 4        |         | 0.13383                    | 0.47549 | 0.12                                    | 0.08   | 0.15  | 0.12  | 0.16   | 0.40  | 0.26484 | 0.74342                    | -0.13 | -0.15 | -0.15    | -0.13                    | -0.10 | -0.11   | -0.10 |       |                       |   |   |       |   |   |         |   |   |        |   |   |   |   |   |   |   |   |  |  |  |  |
| RPneg_369.17404_7.972  | RP    | neg        | 7.972           | 369.1740   |            |      | 4        |         | 0.99282                    | 0.99766 | 0.10                                    | 0.37   | 0.30  | 0.20  | 0.28   | -0.32 | 0.19446 | 0.70878                    | 0.40  | 0.33  | 0.38     | 0.32                     | 0.55  | 0.35    | 0.28  |       |                       |   |   |       |   |   |         |   |   |        |   |   |   |   |   |   |   |   |  |  |  |  |
| RPneg_369.17407_6.933  | RP    | neg        | 6.933           | 369.1740   |            |      | 4        |         | 0.02306                    | 0.26503 | -0.19                                   | 0.31   | 0.20  | 0.18  | 0.25   | -0.32 | 0.10538 | 0.59488                    | -0.16 | 0.07  | 0.32     | 0.26                     | 0.36  | 0.14    | 0.17  |       |                       |   |   |       |   |   |         |   |   |        |   |   |   |   |   |   |   |   |  |  |  |  |
| RPneg_369.17413_7.354  | RP    | neg        | 7.354           | 369.1741   |            |      | 4        |         | 0.00360                    | 0.08127 | 0.41                                    | 0.09   | 0.65  | 0.46  | 0.66   | 0.17  | 0.00000 | 0.00024                    | 0.32  | -0.07 | 0.26     | 0.49                     | 0.53  | 0.40    | -0.16 |       |                       |   |   |       |   |   |         |   |   |        |   |   |   |   |   |   |   |   |  |  |  |  |
| RPneg_369.17416_8.491  | RP    | neg        | 8.491           | 369.1742   |            |      | 4        |         | 0.37808                    | 0.69310 | 0.02                                    | 0.07   | 0.13  | 0.03  | 0.16   | 0.19  | 0.23304 | 0.75039                    | 0.23  | 0.18  | 0.26     | 0.23                     | 0.26  | 0.25    | 0.13  |       |                       |   |   |       |   |   |         |   |   |        |   |   |   |   |   |   |   |   |  |  |  |  |
| RPneg_369.17422_7.67   | RP    | neg        | 7.67            | 369.1742   |            |      | 4        |         | 0.55045                    | 0.80387 | -0.05                                   | 0.01   | 0.10  | -0.02 | 0.12   | -0.10 | 0.52724 | 0.91004                    | 0.19  | 0.16  | 0.19     | 0.17                     | 0.21  | 0.20    | 0.15  |       |                       |   |   |       |   |   |         |   |   |        |   |   |   |   |   |   |   |   |  |  |  |  |
| HILICpos_369.1872_5.64 | HILIC | pos        | 5.64            | 369.1872   |            |      | 4        |         | 0.24126                    | 0.58195 | -0.35                                   | 0.27   | 0.49  | 0.47  | -0.47  | -0.32 | 0.      |                            |       |       |          |                          |       |         |       |       |                       |   |   |       |   |   |         |   |   |        |   |   |   |   |   |   |   |   |  |  |  |  |



| Feature_ID             | Mode  | Ionization | Average_Rt.min. | Average_Mz | Metabolite | MSMS | ID_Level | HMDB_ID | IV-Alcohol self-administration (IV-ASA) |         |       |                       |       |       |       |       |   |         |         | IV-Alcohol clamp (IV-AC)   |       |       |          |       |         |       |                       |   |   |   |        |  |
|------------------------|-------|------------|-----------------|------------|------------|------|----------|---------|-----------------------------------------|---------|-------|-----------------------|-------|-------|-------|-------|---|---------|---------|----------------------------|-------|-------|----------|-------|---------|-------|-----------------------|---|---|---|--------|--|
|                        |       |            |                 |            |            |      |          |         | Area Under the Curve (AUC)              |         |       | IV-Ghrelin or Placebo |       |       |       |       |   | BrAC=0  |         | Area Under the Curve (AUC) |       |       | Baseline |       | Post-LD |       | IV-Ghrelin or Placebo |   |   |   | BrAC=0 |  |
|                        |       |            |                 |            |            |      |          |         | p                                       | q       | d     | d                     | d     | d     | d     | d     | d | d       | d       | p                          | q     | d     | d        | d     | d       | d     | d                     | d | d | d | d      |  |
|                        |       |            |                 |            |            |      |          |         |                                         |         |       |                       |       |       |       |       |   |         |         |                            |       |       |          |       |         |       |                       |   |   |   |        |  |
| HILICpos_374.185_4.48  | HILIC | pos        | 4.48            | 374.1850   |            | 4    |          |         | 0.93828                                 | 0.97759 | -0.08 | 0.08                  | 0.37  | 0.05  | 0.15  | -0.29 |   | 0.44318 | 0.87946 | -0.19                      | 0.29  | -0.04 | 0.13     | -0.11 | -0.41   | -0.41 | -0.55                 |   |   |   |        |  |
| HILICpos_374.2048_1.05 | HILIC | pos        | 1.05            | 374.2048   |            | 4    |          |         | 0.69849                                 | 0.87652 | -0.17 | 0.21                  | 0.57  | 0.10  | -0.21 | 0.04  |   | 0.05488 | 0.46335 | -0.24                      | -0.17 | -0.20 | -0.31    | -0.06 | -0.06   | -0.06 | -0.36                 |   |   |   |        |  |
| HILICpos_374.2175_0.55 | HILIC | pos        | 0.55            | 374.2175   |            | 4    |          |         | 0.15797                                 | 0.50099 | -0.36 | 0.24                  | -0.03 | -0.50 | -0.15 | -0.38 |   | 0.41074 | 0.86351 | -0.40                      | 0.02  | -0.58 | -0.29    | 0.16  | 0.12    | 0.06  |                       |   |   |   |        |  |
| RPneg_374.22162_4.28   | RP    | neg        | 4.28            | 374.2216   |            | 4    |          |         | 0.95083                                 | 0.77960 | 0.29  | 0.46                  | -0.31 | 0.49  | 0.19  | 0.07  |   | 0.00761 | 0.18468 | 1.21                       | 2.91  | 0.27  | 0.11     | 0.56  | 4.92    | -0.57 |                       |   |   |   |        |  |
| HILICpos_374.2361_0.46 | HILIC | pos        | 0.46            | 374.2361   |            | 4    |          |         | 0.46640                                 | 0.77411 | -0.21 | -0.27                 | 0.16  | -0.03 | 0.19  | -0.36 |   | 0.52498 | 0.99966 | -0.25                      | -0.28 | -0.07 | -0.34    | -0.05 | -0.44   | -0.18 |                       |   |   |   |        |  |
| HILICpos_374.2516_0.05 | HILIC | pos        | 0.05            | 374.2516   |            | 4    |          |         | 0.10396                                 | 0.43699 | 0.02  | 0.58                  | -0.21 | 0.03  | 0.19  | 0.05  |   | 0.53393 | 0.92292 | 0.05                       | -0.33 | 0.54  | -0.37    | 0.05  | -0.18   | 0.43  |                       |   |   |   |        |  |
| RPpos_374.3262_11.12   | RP    | pos        | 11.12           | 374.3262   |            | 4    |          |         | 0.02770                                 | 0.28557 | -0.53 | 0.12                  | -0.12 | -0.26 | -0.28 | -0.31 |   | 0.63143 | 0.93546 | 0.19                       | -0.20 | -0.21 | -0.47    | 1.84  | 0.33    | 0.61  |                       |   |   |   |        |  |
| RPpos_374.3264_10.88   | RP    | pos        | 10.88           | 374.3264   |            | 4    |          |         | 0.63618                                 | 0.84601 | 0.14  | 0.20                  | 0.45  | 1.16  | 0.39  | -0.31 |   | 0.06138 | 0.48399 | 0.63                       | 0.51  | 0.23  | 1.00     | 0.22  | 0.70    | 0.07  |                       |   |   |   |        |  |
| HILICpos_374.8081_2.97 | HILIC | pos        | 2.97            | 374.8081   |            | 4    |          |         | 0.31584                                 | 0.64235 | -0.30 | 0.08                  | 0.50  | -0.19 | -0.24 | 1.46  |   | 0.73241 | 0.95803 | -0.12                      | -0.20 | 0.12  | 1.17     | 0.24  | 0.03    | -0.38 |                       |   |   |   |        |  |
| RPneg_375.00653_5.187  | RP    | neg        | 5.187           | 375.0065   |            | 4    |          |         | 0.59717                                 | 0.82733 | 0.17  | 0.11                  | 0.37  | 0.55  | 0.15  | 0.40  |   | 0.80846 | 0.97079 | 0.05                       | -0.12 | 0.03  | 0.23     | 0.22  | 0.06    | -0.09 |                       |   |   |   |        |  |
| RPneg_375.00662_1.684  | RP    | neg        | 1.684           | 375.0066   |            | 4    |          |         | 0.01742                                 | 0.24235 | -0.47 | -0.12                 | -0.22 | -0.42 | -0.56 | 0.39  |   | 0.48945 | 0.89836 | -0.45                      | -0.07 | 0.21  | -0.76    | -0.66 | -0.49   | 0.18  |                       |   |   |   |        |  |
| RPneg_375.02081_3.73   | RP    | neg        | 3.73            | 375.0208   |            | 4    |          |         | 0.12117                                 | 0.45664 | 0.46  | 0.42                  | 0.56  | 0.38  | 0.38  | 0.84  |   | 0.56987 | 0.92121 | -0.34                      | -0.35 | -0.29 | -0.32    | -0.32 | -0.37   | -0.27 |                       |   |   |   |        |  |
| HILICneg_375.0212_0.48 | HILIC | neg        | 0.48            | 375.0212   |            | 4    |          |         | 0.07814                                 | 0.40019 | 0.49  | 0.46                  | 0.67  | 0.37  | 0.45  | 0.85  |   | 0.31557 | 0.81238 | -0.49                      | -0.50 | -0.45 | -0.48    | -0.50 | -0.49   | -0.37 |                       |   |   |   |        |  |
| HILICneg_375.0511_5.96 | HILIC | neg        | 5.96            | 375.0511   |            | 4    |          |         | 0.55238                                 | 0.80511 | 0.03  | 0.19                  | 0.31  | 0.16  | 0.11  | -0.79 |   | 0.57402 | 0.92259 | 0.14                       | 0.05  | 0.22  | 0.19     | 0.27  | 0.09    | -0.17 |                       |   |   |   |        |  |
| HILICpos_375.0663_7.09 | HILIC | pos        | 7.09            | 375.0663   |            | 4    |          |         | 0.86207                                 | 0.94834 | 0.02  | 0.19                  | 0.56  | -0.02 | -0.09 | -0.36 |   | 0.00641 | 0.16877 | 0.59                       | 0.62  | 0.88  | 1.08     | 0.46  | 0.06    | -0.08 |                       |   |   |   |        |  |
| RPneg_375.0751_5.592   | RP    | neg        | 5.592           | 375.0751   |            | 4    |          |         | 0.98537                                 | 0.99443 | 0.06  | 0.01                  | 0.14  | 0.17  | 0.14  | -0.21 |   | 0.83722 | 0.97582 | 0.11                       | 0.14  | 0.00  | 0.07     | 0.20  | 0.12    | 0.10  |                       |   |   |   |        |  |
| RPneg_375.08456_6.667  | RP    | neg        | 6.667           | 375.0846   |            | 4    |          |         | 0.20665                                 | 0.54993 | -0.42 | 0.00                  | 0.21  | -0.22 | -0.30 | -0.16 |   | 0.69527 | 0.95054 | -0.37                      | 0.35  | -0.29 | -0.38    | 0.08  | -0.46   | -0.09 |                       |   |   |   |        |  |
| HILICneg_375.105_1.19  | HILIC | neg        | 1.19            | 375.1050   |            | 4    |          |         | 0.49403                                 | 0.77321 | -0.08 | 0.06                  | 0.11  | -0.14 | 0.16  | -0.04 |   | 0.55206 | 0.91809 | 0.02                       | 0.27  | 0.15  | 0.04     | 0.06  | 0.14    | -0.02 |                       |   |   |   |        |  |
| RPneg_375.11934_6.082  | RP    | neg        | 6.082           | 375.1191   |            | 4    |          |         | 0.71327                                 | 0.88230 | 0.27  | 0.58                  | 0.43  | -0.19 | 0.47  | -0.31 |   | 0.46701 | 0.88844 | 0.56                       | 0.41  | 0.68  | 1.17     | 0.05  | -0.41   | 0.01  |                       |   |   |   |        |  |
| RPneg_375.1197_6.207   | RP    | neg        | 6.207           | 375.1192   |            | 4    |          |         | 0.61259                                 | 0.83447 | 0.29  | 0.72                  | 0.49  | 0.19  | 0.39  | -0.24 |   | 0.44162 | 0.87936 | 0.61                       | 0.51  | 0.75  | 1.04     | 0.36  | 0.62    | 0.00  |                       |   |   |   |        |  |
| RPneg_375.14514_6.453  | RP    | neg        | 6.453           | 375.1451   |            | 4    |          |         | 0.000473                                | 0.13733 | -0.13 | -0.07                 | 0.02  | 0.09  | -0.09 | -0.37 |   | 0.36702 | 0.83906 | 0.25                       | 0.63  | 0.05  | 0.40     | 0.16  | 0.18    | 0.79  |                       |   |   |   |        |  |
| HILICneg_375.1452_0.62 | HILIC | neg        | 0.62            | 375.1452   |            | 4    |          |         | 0.06465                                 | 0.37457 | -0.13 | -0.18                 | 0.13  | -0.16 | -0.01 | -0.53 |   | 0.02135 | 0.23757 | 0.29                       | 0.25  | 0.28  | 0.29     | 0.31  | 0.28    | 0.35  |                       |   |   |   |        |  |
| RPpos_375.1643_6.48    | RP    | pos        | 6.48            | 375.1643   |            | 4    |          |         | 0.78717                                 | 0.91650 | 0.10  | 0.50                  | 0.93  | 0.05  | 0.86  | 0.22  |   | 0.92866 | 0.98959 | -0.05                      | 1.21  | 0.13  | -0.39    | 0.06  | -0.14   | -0.59 |                       |   |   |   |        |  |
| RPneg_375.16617_13.181 | RP    | neg        | 13.181          | 375.1662   |            | 4    |          |         | 0.54012                                 | 0.79830 | -0.16 | 0.22                  | 0.26  | -0.15 | 0.13  | -0.51 |   | 0.18487 | 0.70052 | -0.10                      | -0.24 | -0.11 | 0.10     | 0.03  | -0.25   | -0.05 |                       |   |   |   |        |  |
| HILICpos_375.1773_0.64 | HILIC | pos        | 0.64            | 375.1773   |            | 4    |          |         | 0.06152                                 | 0.36878 | -0.43 | -0.12                 | 0.39  | -0.31 | -0.45 | -0.46 |   | 0.70877 | 0.95262 | 0.08                       | 0.02  | 0.22  | -0.12    | 0.61  | -0.14   | -0.03 |                       |   |   |   |        |  |
| RPneg_375.18124_9.262  | RP    | neg        | 9.262           | 375.1812   |            | 4    |          |         | 0.17682                                 | 0.52261 | -0.06 | 0.00                  | 0.04  | -0.06 | 0.04  | -0.06 |   | 0.30623 | 0.80634 | 0.05                       | 0.04  | 0.10  | 0.04     | 0.02  | 0.03    | 0.08  |                       |   |   |   |        |  |
| RPpos_375.1883_5.84    | RP    | pos        | 5.84            | 375.1883   |            | 4    |          |         | 0.14378                                 | 0.48430 | 0.26  | 0.26                  | 0.42  | 0.24  | 0.30  | 0.32  |   | 0.57088 | 0.92155 | -0.15                      | -0.19 | -0.10 | -0.13    | -0.06 | -0.21   | -0.28 |                       |   |   |   |        |  |
| RPpos_375.2503_10.35   | RP    | pos        | 10.35           | 375.2503   |            | 4    |          |         | 0.62318                                 | 0.84007 | 0.17  | 0.20                  | 0.44  | 0.64  | 0.41  | -0.25 |   | 0.76331 | 0.96314 | -0.02                      | -0.14 | -0.05 | 0.20     | -0.17 | 0.06    | -0.13 |                       |   |   |   |        |  |
| RPneg_375.25327_10.991 | RP    | neg        | 10.991          | 375.2533   |            | 4    |          |         | 0.00249                                 | 0.10246 | 1.20  | 0.03                  | 0.17  | 0.87  | 2.47  | 0.20  |   | 0.59945 | 0.92780 | 0.18                       | -0.10 | 0.57  | -0.07    | 0.11  | 0.38    | -0.03 |                       |   |   |   |        |  |
| RPneg_375.2533_11.072  | RP    | neg        | 11.072          | 375.2533   |            | 4    |          |         | 0.00556                                 | 0.14635 | 0.62  | -0.05                 | 0.08  | 0.28  | 2.09  | 0.10  |   | 0.39419 | 0.85421 | 0.51                       | 0.31  | 0.91  | 2.20     | 0.44  | 0.24    | -0.07 |                       |   |   |   |        |  |
| RPpos_375.2888_9.75    | RP    | pos        | 9.75            | 375.2888   |            | 4    |          |         | 0.52623                                 | 0.79137 | -0.20 | 0.41                  | -0.02 | -0.21 | -0.07 | -0.59 |   | 0.01609 | 0.27178 | 1.45                       | 0.14  | 0.80  | 1.74     | 2.55  | 2.60    | 1.05  |                       |   |   |   |        |  |
| RPpos_375.2896_9.83    | RP    | pos        | 9.83            | 375.2896   |            | 4    |          |         | 0.00469                                 | 0.33734 | 0.38  | 0.54                  | 0.50  | 0.28  | 0.58  | 0.28  |   | 0.10296 | 0.57751 | 0.70                       | 0.22  | 0.49  | 0.87     | 1.13  | 1.14    | 1.08  |                       |   |   |   |        |  |
| HILICneg_375.305_1.45  | HILIC | neg        | 1.45            | 375.3050   |            | 4    |          |         | 0.52173                                 | 0.93209 | -0.09 | 0.13                  | 0.08  | -0.09 | 0.12  | 0.28  |   | 0.07553 | 0.29532 | -0.34                      | 0.35  | -0.36 | -0.44    | -0.21 | -0.27   | -0.25 |                       |   |   |   |        |  |
| RPpos_375.7375_7.43    | RP    | pos        | 7.43            | 375.7375   |            | 4    |          |         | 0.45335                                 | 0.74626 | -0.24 | 0.00                  | 0.89  | -0.26 | -0.30 | 0.54  |   | 0.27313 | 0.78366 | -0.33                      | -0.24 | -0.03 | 0.37     | 0.11  | -0.43   | -0.38 |                       |   |   |   |        |  |
| HILICneg_375.9507_5.41 | HILIC | neg        | 5.41            | 375.9507   |            | 4    |          |         | 0.36716                                 | 0.68397 | 0.26  | 0.46                  | 0.44  | 0.13  | 0.40  | 0.64  |   | 0.21533 | 0.73170 | 0.06                       | -0.14 | 0.04  | 0.20     | 0.13  | 0.28    | -0.66 |                       |   |   |   |        |  |
| HILICpos_375.9832_6.25 | HILIC | pos        | 6.25            | 375.9832   |            | 4    |          |         | 0.90416                                 | 0.96465 | 0.03  | 0.16                  | 0.54  | 0.33  | -0.13 | -0.70 |   | 0.02633 | 0.34220 | 0.57                       | 0.71  | 0.50  | 0.80     | 0.36  | 0.40    | -0.61 |                       |   |   |   |        |  |
| HILICpos_376.0506_5.33 | HILIC | pos        | 5.33            | 376.0506   |            | 4    |          |         | 0.17948                                 | 0.52467 | 0.37  | 0.38                  | 0.47  | 0.36  | 0.46  | 0.52  |   | 0.05036 | 0.44686 | 0.15                       | 0.12  | 0.04  | 0.18     | 0.17  | 0.45    | -0.42 |                       |   |   |   |        |  |
| HILICneg_376.0516_4.92 | HILIC | neg        | 4.92            | 376.0516   |            | 4    |          |         | 0.60630                                 | 0.83194 | -0.14 | 0.07                  | 0.54  | 0.11  | 0.43  | -0.85 |   | 0.02005 | 0.29989 | 0.37                       | 0.38  | 0.32  | 0.42     | 0.26  | 0.37    | 0.42  |                       |   |   |   |        |  |
| HILICneg_376.0518_0.97 | HILIC | neg        | 0.97            | 376.0518   |            | 4    |          |         | 0.89470                                 | 0.96181 | 0.03  | 0.36                  | 0.05  | 0.15  | 0.32  | -0.20 |   | 0.75926 | 0.96233 | 0.09                       | 0.20  | 0.07  | 0.30     | 0.11  | 0.06    | -0.18 |                       |   |   |   |        |  |
| HILICneg_376.0518_5.68 | HILIC | neg        | 5.68            | 376.0518   |            | 4    |          |         | 0.84758                                 | 0.94294 | 0.08  | 0.11                  | 0.69  | 0.00  | 0.28  | -0.81 |   | 0.49861 | 0.90086 | 0.08                       | -0.87 | -0.15 | 0.89     | -0.33 | 0.31    | -0.02 |                       |   |   |   |        |  |
| HILICneg_376.0526_6.98 | HILIC | neg        | 6.98            | 376.0526   |            | 4    |          |         | 0.80361                                 | 0.92441 | 0.02  | 0.13                  | 0.69  | 0.20  | 0.17  | -0.86 |   | 0.49082 | 0.89836 | 0.02                       | 0.25  | 0.37  | 0.28     | -0.44 | -0.24   | -0.10 |                       |   |   |   |        |  |
| RPneg_376.1149_6.969   | RP    | neg        | 6.969           | 376.1149   |            | 4    |          |         | 0.60000                                 | 0.82870 | 0.34  | 0.71                  | 0.50  | 0.07  | 0.68  | -0.03 |   | 0.18917 | 0.70460 | 0.76                       | 0.65  | 0.64  | 1.29     | 0.37  | 1.02    | 0.19  |                       |   |   |   |        |  |
| RPneg_376.11536_7.165  | RP    | neg        | 7.165           | 376.1154   |            | 4    |          |         | 0.43211                                 |         |       |                       |       |       |       |       |   |         |         |                            |       |       |          |       |         |       |                       |   |   |   |        |  |

| Feature_ID             | Mode  | Ionization | Average.Rt.min. | Average.Mz | Metabolite | MSMS | ID_Level | HMDB_ID | IV-Alcohol self-administration (IV-ASA) |         |       |       |       |       |          |       |         |                       |       |       | IV-Alcohol clamp (IV-AC) |       |       |                            |       |       |          |   |   |         |   |   |                       |   |   |       |   |   |         |   |   |        |  |  |
|------------------------|-------|------------|-----------------|------------|------------|------|----------|---------|-----------------------------------------|---------|-------|-------|-------|-------|----------|-------|---------|-----------------------|-------|-------|--------------------------|-------|-------|----------------------------|-------|-------|----------|---|---|---------|---|---|-----------------------|---|---|-------|---|---|---------|---|---|--------|--|--|
|                        |       |            |                 |            |            |      |          |         | Area Under the Curve (AUC)              |         |       |       |       |       | Baseline |       |         | IV-Ghrelin or Placebo |       |       | BrAC=0                   |       |       | Area Under the Curve (AUC) |       |       | Baseline |   |   | Post-LD |   |   | IV-Ghrelin or Placebo |   |   | IV-AC |   |   | Post-AC |   |   | BrAC=0 |  |  |
|                        |       |            |                 |            |            |      |          |         | p                                       | q       | d     | d     | d     | d     | d        | d     | d       | d                     | d     | d     | p                        | q     | d     | d                          | d     | d     | d        | d | d | p       | q | d | d                     | d | d | d     | d | d | d       | d | d |        |  |  |
| RPneg_378.14972_10.919 | RP    | neg        | 10.919          | 378.1497   |            |      | 4        |         | 0.00004                                 | 0.01119 | 1.30  | -0.03 | 0.65  | 1.33  | 1.68     | 0.11  | 0.71359 | 0.95354               | -0.17 | -0.47 | -0.02                    | -0.27 | -0.11 | -0.01                      | -0.01 | -0.05 |          |   |   |         |   |   |                       |   |   |       |   |   |         |   |   |        |  |  |
| HILICpos_378.176_1.32  | HILIC | pos        | 1.32            | 378.1760   |            |      | 4        |         | 0.64306                                 | 0.84898 | -0.08 | 0.14  | 0.60  | -0.11 | 0.00     | 0.06  | 0.66716 | 0.94427               | 0.06  | 0.56  | 0.15                     | 0.07  | 0.03  | 0.33                       | -0.17 | -0.51 |          |   |   |         |   |   |                       |   |   |       |   |   |         |   |   |        |  |  |
| HILICneg_378.1912_5.69 | HILIC | neg        | 5.69            | 378.1912   |            |      | 4        |         | 0.56707                                 | 0.81262 | 0.14  | -0.03 | 0.94  | 0.52  | -0.13    | -0.11 | 0.01992 | 0.29847               | 0.52  | 0.44  | 0.66                     | 0.86  | 0.38  | 0.25                       | -0.58 | -0.58 |          |   |   |         |   |   |                       |   |   |       |   |   |         |   |   |        |  |  |
| HILICneg_378.1915_0.97 | HILIC | neg        | 0.97            | 378.1915   |            |      | 4        |         | 0.92556                                 | 0.97207 | 0.03  | 0.34  | 0.08  | 0.13  | 0.23     | 0.00  | 0.64827 | 0.93906               | 0.13  | 0.13  | 0.30                     | 0.19  | 0.32  | 0.11                       | -0.38 | -0.38 |          |   |   |         |   |   |                       |   |   |       |   |   |         |   |   |        |  |  |
| RPpos_378.1943_5.87    | RP    | pos        | 5.87            | 378.1943   |            |      | 4        |         | 0.15016                                 | 0.49239 | 0.26  | 0.12  | 0.35  | 0.22  | 0.42     | 0.48  | 0.84522 | 0.97669               | -0.09 | -0.19 | 0.03                     | 0.04  | -0.07 | -0.18                      | -0.23 | -0.23 |          |   |   |         |   |   |                       |   |   |       |   |   |         |   |   |        |  |  |
| RPpos_378.2063_10.62   | RP    | pos        | 10.62           | 378.2063   |            |      | 4        |         | 0.77486                                 | 0.91139 | -0.11 | 0.30  | 1.16  | 2.06  | 0.09     | 0.09  | 0.59207 | 0.83663               | -0.04 | 0.06  | 0.06                     | 0.12  | -0.14 | 0.12                       | -0.12 | -0.12 |          |   |   |         |   |   |                       |   |   |       |   |   |         |   |   |        |  |  |
| RPpos_378.2399_9.55    | RP    | pos        | 9.55            | 378.2399   |            |      | 4        |         | 0.53252                                 | 0.79471 | -0.17 | 0.41  | 0.19  | -0.30 | 0.07     | -0.11 | 0.30665 | 0.80651               | 0.12  | 0.08  | 0.65                     | 0.87  | 0.05  | 0.23                       | 0.80  | 0.80  |          |   |   |         |   |   |                       |   |   |       |   |   |         |   |   |        |  |  |
| HILICneg_378.2407_4.38 | HILIC | neg        | 4.38            | 378.2407   |            |      | 4        |         | 0.28161                                 | 0.61577 | -0.26 | 0.44  | -0.03 | -0.31 | 0.06     | 0.08  | 0.68030 | 0.94763               | 0.20  | -0.19 | 0.61                     | -0.20 | 0.12  | 0.30                       | 0.04  | 0.04  |          |   |   |         |   |   |                       |   |   |       |   |   |         |   |   |        |  |  |
| RPneg_378.24142_9.999  | RP    | neg        | 9.999           | 378.2414   |            |      | 4        |         | 0.65676                                 | 0.85625 | -0.13 | 0.25  | 0.11  | -0.20 | 0.13     | 0.01  | 0.77278 | 0.96458               | 0.01  | 0.20  | 0.25                     | -0.31 | -0.21 | 0.01                       | 0.30  | 0.30  |          |   |   |         |   |   |                       |   |   |       |   |   |         |   |   |        |  |  |
| RPpos_378.2417_12.26   | RP    | pos        | 12.26           | 378.2417   |            |      | 4        |         | 0.17388                                 | 0.51922 | -0.45 | 0.26  | -0.23 | -0.40 | -0.10    | -0.70 | 0.45651 | 0.88432               | -0.19 | -0.04 | -0.13                    | 0.03  | 0.08  | -0.89                      | -0.41 | -0.41 |          |   |   |         |   |   |                       |   |   |       |   |   |         |   |   |        |  |  |
| RPneg_378.24652_8.98   | RP    | neg        | 8.98            | 378.2465   |            |      | 4        |         | 0.92912                                 | 0.97471 | 0.00  | 0.09  | 0.22  | 0.10  | -0.01    | -0.06 | 0.49039 | 0.89836               | 0.21  | 0.28  | 0.39                     | 0.20  | -0.09 | 0.17                       | 0.35  | 0.35  |          |   |   |         |   |   |                       |   |   |       |   |   |         |   |   |        |  |  |
| RPpos_378.2494_7.36    | RP    | pos        | 7.36            | 378.2494   |            |      | 4        |         | 0.28189                                 | 0.61590 | -0.33 | -0.08 | 0.79  | -0.32 | -0.42    | 0.34  | 0.11667 | 0.60164               | -0.46 | -0.26 | 0.04                     | -0.20 | -0.21 | -0.48                      | -0.55 | -0.55 |          |   |   |         |   |   |                       |   |   |       |   |   |         |   |   |        |  |  |
| RPpos_378.2649_10.39   | RP    | pos        | 10.39           | 378.2649   |            |      | 4        |         | 0.80871                                 | 0.92661 | 0.11  | 0.37  | 0.41  | -0.09 | 0.53     | -0.07 | 0.38297 | 0.84854               | -0.40 | -0.07 | 0.04                     | -0.27 | -0.23 | -0.79                      | -0.08 | -0.08 |          |   |   |         |   |   |                       |   |   |       |   |   |         |   |   |        |  |  |
| RPpos_378.2675_10.97   | RP    | pos        | 10.97           | 378.2675   |            |      | 4        |         | 0.46925                                 | 0.75666 | 0.11  | 1.37  | 0.05  | 0.45  | 0.11     | 0.46  | 0.08676 | 0.54471               | -0.38 | -0.41 | -0.03                    | -0.12 | -0.16 | -0.40                      | -0.38 | -0.38 |          |   |   |         |   |   |                       |   |   |       |   |   |         |   |   |        |  |  |
| RPneg_378.30096_10.72  | RP    | neg        | 10.72           | 378.3010   |            |      | 4        |         | 0.20928                                 | 0.55229 | 0.32  | -0.02 | 0.73  | 0.31  | 0.55     | -0.32 | 0.00000 | 0.00002               | 1.35  | 1.10  | 1.00                     | 1.51  | 1.73  | 1.26                       | 0.37  | 0.37  |          |   |   |         |   |   |                       |   |   |       |   |   |         |   |   |        |  |  |
| RPpos_378.3208_9.36    | RP    | pos        | 9.36            | 378.3208   |            |      | 4        |         | 0.00180                                 | 0.08578 | -0.85 | -0.19 | -0.31 | -0.43 | -0.11    | 0.06  | 0.95330 | 0.99398               | -0.08 | -0.17 | -0.26                    | 0.12  | 0.37  | 0.32                       | -0.13 | -0.13 |          |   |   |         |   |   |                       |   |   |       |   |   |         |   |   |        |  |  |
| RPpos_378.3575_11.06   | RP    | pos        | 11.06           | 378.3575   |            |      | 4        |         | 0.87221                                 | 0.95220 | -0.05 | -0.01 | 0.14  | -0.48 | 0.72     | 0.41  | 0.50195 | 0.90271               | 0.28  | 0.10  | -0.60                    | -0.39 | 1.30  | 0.56                       | -0.46 | -0.46 |          |   |   |         |   |   |                       |   |   |       |   |   |         |   |   |        |  |  |
| RPneg_378.35821_11.444 | RP    | neg        | 11.444          | 378.3582   |            |      | 4        |         | 0.00820                                 | 0.17884 | -0.78 | 0.02  | -0.36 | -0.02 | -0.62    | -0.14 | 0.81413 | 0.97171               | 0.11  | -0.14 | 0.54                     | -0.07 | 0.42  | -0.60                      | -0.55 | -0.55 |          |   |   |         |   |   |                       |   |   |       |   |   |         |   |   |        |  |  |
| HILICneg_378.9442_1.06 | HILIC | neg        | 1.06            | 378.9442   |            |      | 4        |         | 0.02848                                 | 0.28787 | 0.26  | 0.03  | 0.74  | 0.38  | 0.37     | -0.06 | 0.25892 | 0.77346               | 0.30  | 0.11  | 0.56                     | 0.04  | 0.26  | 0.16                       | -0.12 | -0.12 |          |   |   |         |   |   |                       |   |   |       |   |   |         |   |   |        |  |  |
| HILICneg_378.9955_4.33 | HILIC | neg        | 4.33            | 378.9955   |            |      | 4        |         | 0.56027                                 | 0.98599 | -0.01 | 0.12  | 0.44  | -0.11 | 0.05     | -0.13 | 0.17720 | 0.69242               | 0.13  | 0.23  | 0.04                     | 0.14  | 0.57  | 0.10                       | 0.16  | 0.16  |          |   |   |         |   |   |                       |   |   |       |   |   |         |   |   |        |  |  |
| HILICneg_378.9961_7.36 | HILIC | neg        | 7.36            | 378.9961   |            |      | 4        |         | 0.47287                                 | 0.75958 | -0.24 | -0.13 | 0.06  | 0.10  | -0.01    | 0.30  | 0.52794 | 0.91027               | 0.07  | 0.41  | 0.47                     | 0.03  | 0.27  | -0.52                      | 0.01  | 0.01  |          |   |   |         |   |   |                       |   |   |       |   |   |         |   |   |        |  |  |
| RPpos_379.0845_9.43    | RP    | pos        | 9.43            | 379.0845   |            |      | 4        |         | 0.04990                                 | 0.34619 | -0.56 | -0.08 | -0.32 | -0.02 | 0.11     | 0.11  | 0.60384 | 0.92892               | 0.13  | 0.16  | 0.75                     | -0.81 | 0.71  | 0.32                       | -0.73 | -0.73 |          |   |   |         |   |   |                       |   |   |       |   |   |         |   |   |        |  |  |
| HILICneg_379.0887_1.05 | HILIC | neg        | 1.05            | 379.0887   |            |      | 4        |         | 0.03691                                 | 0.31310 | 0.55  | 0.54  | 1.45  | 0.64  | 1.48     | 0.30  | 0.01204 | 0.23428               | 0.84  | 0.43  | 0.95                     | 0.39  | 1.17  | 0.92                       | 0.34  | 0.34  |          |   |   |         |   |   |                       |   |   |       |   |   |         |   |   |        |  |  |
| RPneg_379.12744_4.709  | RP    | neg        | 4.709           | 379.1274   |            |      | 4        |         | 0.69514                                 | 0.87498 | -0.18 | -0.33 | 0.01  | -0.45 | 0.28     | 0.19  | 0.23347 | 0.75094               | 0.61  | 0.33  | 0.22                     | 0.66  | 0.23  | 1.03                       | 0.78  | 0.78  |          |   |   |         |   |   |                       |   |   |       |   |   |         |   |   |        |  |  |
| HILICneg_379.128_1.78  | HILIC | neg        | 1.78            | 379.1280   |            |      | 4        |         | 0.74808                                 | 0.89957 | -0.16 | -0.33 | 0.08  | -0.45 | 0.24     | 0.25  | 0.25025 | 0.76647               | 0.53  | 0.23  | 0.29                     | 0.62  | 0.17  | 0.90                       | 0.59  | 0.59  |          |   |   |         |   |   |                       |   |   |       |   |   |         |   |   |        |  |  |
| HILICpos_379.1356_1.84 | HILIC | pos        | 1.84            | 379.1356   |            |      | 4        |         | 0.30581                                 | 0.63468 | 0.28  | 0.04  | 0.64  | 0.41  | 0.67     | 0.08  | 0.85472 | 0.97834               | 0.04  | -0.01 | 0.09                     | 0.01  | 0.15  | -0.12                      | -0.10 | -0.10 |          |   |   |         |   |   |                       |   |   |       |   |   |         |   |   |        |  |  |
| HILICpos_379.1495_0.46 | HILIC | pos        | 0.46            | 379.1495   |            |      | 4        |         | 0.12641                                 | 0.46293 | -0.32 | -0.41 | 0.05  | 0.14  | -0.56    | 0.12  | 0.16212 | 0.67221               | -0.55 | -0.14 | -0.40                    | -0.54 | -0.10 | -0.09                      | -0.54 | -0.54 |          |   |   |         |   |   |                       |   |   |       |   |   |         |   |   |        |  |  |
| RPneg_379.15717_10.916 | RP    | neg        | 10.916          | 379.1572   |            |      | 4        |         | 0.00085                                 | 0.05855 | 1.57  | -0.11 | 0.63  | 1.22  | 2.81     | -0.16 | 0.69341 | 0.95008               | -0.13 | -0.29 | 0.29                     | -0.30 | -0.11 | -0.20                      | -0.10 | -0.10 |          |   |   |         |   |   |                       |   |   |       |   |   |         |   |   |        |  |  |
| RPneg_379.16083_5.361  | RP    | neg        | 5.361           | 379.1608   |            |      | 4        |         | 0.01651                                 | 0.23757 | 0.64  | 0.24  | 0.89  | 1.00  | 0.11     | 0.04  | 0.00214 | 0.09058               | 0.97  | 0.31  | 0.56                     | 1.28  | 1.24  | 1.16                       | 0.07  | 0.07  |          |   |   |         |   |   |                       |   |   |       |   |   |         |   |   |        |  |  |
| RPpos_379.1688_2.12    | RP    | pos        | 2.12            | 379.1688   |            |      | 4        |         | 0.72080                                 | 0.88621 | -0.06 | 0.07  | 1.09  | 0.10  | -0.19    | -0.48 | 0.00171 | 0.07847               | 0.67  | 0.41  | 1.21                     | 1.07  | 0.98  | 0.48                       | -0.14 | -0.14 |          |   |   |         |   |   |                       |   |   |       |   |   |         |   |   |        |  |  |
| RPneg_379.17813_11.193 | RP    | neg        | 11.193          | 379.1781   |            |      | 4        |         | 0.00004                                 | 0.01117 | 3.17  | -0.03 | 0.61  | 2.27  | 5.93     | -0.12 | 0.81580 | 0.97203               | 0.05  | -0.13 | 0.65                     | -0.10 | -0.01 | -0.12                      | -0.12 | -0.12 |          |   |   |         |   |   |                       |   |   |       |   |   |         |   |   |        |  |  |
| HILICpos_379.1938_1.3  | HILIC | pos        | 1.3             | 379.1938   |            |      | 4        |         | 0.21838                                 | 0.56043 | -0.21 | 0.17  | 0.34  | -0.11 | -0.33    | -0.46 | 0.77352 | 0.96458               | 0.07  | 0.16  | 0.71                     | -0.26 | 0.22  | -0.14                      | -0.03 | -0.03 |          |   |   |         |   |   |                       |   |   |       |   |   |         |   |   |        |  |  |
| RPpos_379.1938_3.69    | RP    | pos        | 3.69            | 379.1938   |            |      | 4        |         | 0.77245                                 | 0.60829 | -0.26 | 0.19  | 0.32  | -0.20 | 0.21     | -0.43 | 0.77746 | 0.96543               | 0.06  | 0.22  | 0.72                     | -0.18 | 0.23  | -0.16                      | -0.06 | -0.06 |          |   |   |         |   |   |                       |   |   |       |   |   |         |   |   |        |  |  |
| RPpos_379.2006_11.18   | RP    | pos        | 11.18           | 379.2006   |            |      | 4        |         | 0.00686                                 | 0.16352 | 1.03  | -0.02 | 0.52  | 1.09  | 2.14     | -0.31 | 0.90747 | 0.98698               | -0.06 | -0.26 | 0.40                     | 0.24  | 0.09  | -0.13                      | -0.01 | -0.01 |          |   |   |         |   |   |                       |   |   |       |   |   |         |   |   |        |  |  |
| RPpos_379.2153_10.02   | RP    | pos        | 10.02           | 379.2153   |            |      | 4        |         | 0.89984                                 | 0.96330 | -0.04 | 0.33  | -0.29 | 0.47  | -0.19    | -0.27 | 0.26186 | 0.77484               | -0.31 | 0.03  | -0.31                    | -0.13 | -0.31 | 0.56                       | -0.30 | -0.30 |          |   |   |         |   |   |                       |   |   |       |   |   |         |   |   |        |  |  |
| RPpos_379.244_12.26    | RP    | pos        | 12.26           | 379.2440   |            |      | 4        |         | 0.20275                                 | 0.54737 | -0.37 | 0.54  | -0.06 | -0.63 | 0.37     | -0.10 | 0.55682 | 0.91947               | -0.15 | -0.31 | 0.04                     | -0.10 | 0.03  | -0.07                      | -0.55 | -0.55 |          |   |   |         |   |   |                       |   |   |       |   |   |         |   |   |        |  |  |
| HILICpos_379.2489_0.63 | HILIC | pos        | 0.63            | 379.2489   |            |      | 4        |         | 0.12468                                 | 0.46023 | -0.37 | -0.29 | 0.27  | 0.10  | -0.28    | 0.39  | 0.04870 | 0.44087               | -0.33 | -0.23 | -0.25                    | -0.36 | -0.38 | 0.17                       | -0.05 | -0.05 |          |   |   |         |   |   |                       |   |   |       |   |   |         |   |   |        |  |  |
| RPpos_379.2493_5.84    | RP    | pos        | 5.84            | 379.2493   |            |      | 4        |         | 0.25267                                 | 0.59120 | -0.31 | 0.06  | 0.67  | -0.60 | -0.28    | 0.30  | 0.02766 | 0.34840               | -0.32 | -0.30 | -0.08                    | -0.39 | -0.09 | -0.09                      | -0.50 | -0.50 |          |   |   |         |   |   |                       |   |   |       |   |   |         |   |   |        |  |  |
| RPpos_379.282_10.89    | RP    | pos        | 10.89           | 379.2820   |            |      | 4        |         | 0.04457                                 | 0.33416 | 0.62  | 0.10  | 0.47  | 1.29  | 1.60     | -0.27 | 0.17070 | 0.68293               | 0.37  | 0.66  | 0.40                     | 0.31  | 0.21  | 0.71                       | 0.03  | 0.03  |          |   |   |         |   |   |                       |   |   |       |   |   |         |   |   |        |  |  |
| RPpos_379.7294_6.88    | RP    | pos        | 6.88            | 379.7294   |            |      | 4        |         | 0.91183                                 | 0.96756 | 0.01  | 0.29  | 0.32  | 0.21  | 0.01     | 1.16  | 0.66796 | 0.94452               | -0.17 | -0.09 | 0.01                     | 0.18  | 0.05  | 0.76                       | -0.58 | -0.58 |          |   |   |         |   |   |                       |   |   |       |   |   |         |   |   |        |  |  |
| RPpos_379.7296_7.25    | RP    | pos        | 7.25            | 379.7296   |            |      | 4        |         | 0.65890                                 | 0.85724 | -0.12 | -0.27 | 0.48  | -0.01 | -0.26    | 0.38  | 0.82157 | 0.97315               | 0.01  | 0.05  | 0.19                     | 0.29  | -0.09 | -0.59                      | -0.16 | -0.16 |          |   |   |         |   |   |                       |   |   |       |   |   |         |   |   |        |  |  |
| RPneg_380.02011_7.722  | RP    | neg        | 7.722           | 380.0201   |            |      | 4        |         | 0.54332                                 | 0.79987 | -0.08 | -0.06 | 0.05  | -0.11 | 0.01     | -0.28 | 0.81929 | 0.97244               | 0.03  | -0.01 | 0.04                     | 0.16  | -0.10 | 0.06                       | 0.04  | 0.04  |          |   |   |         |   |   |                       |   |   |       |   |   |         |   |   |        |  |  |
| HILICpos_380.0616_0.86 | HILIC | pos        | 0.86            | 380.0616   |            |      | 4        |         | 0.36095                                 | 0.67918 | 0.23  | 0.29  | 1.01  | 0.41  | -0.06    | -0.05 | 0.02667 | 0.34401               | 1.26  | -0.04 | 0.50                     | 0.56  | 1.65  | 0.57                       | 0.42  | 0.42  |          |   |   |         |   |   |                       |   |   |       |   |   |         |   |   |        |  |  |
| HILICneg_380.0822_1.37 | HILIC | neg        | 1.37            | 380.0822   |            |      | 4        |         | 0.58993                                 | 0.82399 | -0.20 | 0.02  | -0.06 | -0.15 | -0.39    | -0.25 | 0.01650 | 0.27538               | -0.39 | -0.30 | -0.17                    | -0.52 | -0.41 | -0.43                      | -0.63 | -0.63 |          |   |   |         |   |   |                       |   |   |       |   |   |         |   |   |        |  |  |
| RPneg_380.09732_7.213  | RP    | neg        | 7.213           | 380.0973   |            |      | 4        |         | 0.58234                                 | 0.81952 | -0.21 | -0.16 | -0.16 | -0.17 | -0.14    | -0.23 | 0.07551 | 0.52069               | 1.83  | 1.32  | 2.06                     | 1.56  | 1.61  | 2.04                       | 1.64  | 1.64  |          |   |   |         |   |   |                       |   |   |       |   |   |         |   |   |        |  |  |
| HILICpos_380.1151_0.44 | HILIC | pos        | 0.44            | 380.1151   |            |      | 4        |         | 0.48460                                 | 0.78726 | -0.15 | -0.10 | -0.08 | 0.03  | -0.17    | -0.26 | 0.09210 | 0.55862               | 2.48  | 1.49  | 2.14                     | 1.95  | 1.76  | 1.82                       | 2.22  | 2.22  |          |   |   |         |   |   |                       |   |   |       |   |   |         |   |   |        |  |  |
| HILICneg_380.1183_4.21 | HILIC | neg        | 4.21            | 380.1183   |            |      | 4        |         | 0.05069                                 | 0.34713 | -0.27 | 0.13  | 0.46  | -0    |          |       |         |                       |       |       |                          |       |       |                            |       |       |          |   |   |         |   |   |                       |   |   |       |   |   |         |   |   |        |  |  |



| Feature_ID             | Mode  | Ionization | Average Rt.min. | Average Mz | Metabolite | MSMS | ID_Level | HMDB_ID | IV-Alcohol self-administration (IV-ASA) |         |        |       |        |                       |       |                       |         |         | IV-Alcohol clamp (IV-AC)   |       |         |       |                       |                       |       |   |         |   |        |
|------------------------|-------|------------|-----------------|------------|------------|------|----------|---------|-----------------------------------------|---------|--------|-------|--------|-----------------------|-------|-----------------------|---------|---------|----------------------------|-------|---------|-------|-----------------------|-----------------------|-------|---|---------|---|--------|
|                        |       |            |                 |            |            |      |          |         | Area Under the Curve (AUC)              |         |        |       |        | IV-Ghrelin or Placebo |       |                       |         |         | Area Under the Curve (AUC) |       |         |       |                       | IV-Ghrelin or Placebo |       |   |         |   |        |
|                        |       |            |                 |            |            |      |          |         | Baseline                                |         | IV-ASA |       | BrAC=0 | Baseline              |       | IV-Ghrelin or Placebo |         | BrAC=0  | Baseline                   |       | Post-LD |       | IV-Ghrelin or Placebo |                       | IV-AC |   | Post-AC |   | BrAC=0 |
|                        |       |            |                 |            |            |      |          |         | p                                       | q       | d      | d     | d      | d                     | d     | d                     | d       | d       | p                          | q     | d       | d     | d                     | d                     | d     | d | d       | d | d      |
| HILICpos_382.2057_0.43 | HILIC | pos        | 0.43            | 382.2057   |            |      | 4        |         | 0.77029                                 | 0.90981 | -0.03  | 0.02  | 0.66   | 0.13                  | 0.33  | 0.01                  | 0.27016 | 0.78219 | 0.18                       | 0.80  | 0.22    | 0.06  | 0.76                  | -0.22                 | -0.66 |   |         |   |        |
| RPpos_382.2387_6.97    | RP    | pos        | 6.97            | 382.2387   |            |      | 4        |         | 0.67892                                 | 0.86667 | 0.06   | 0.49  | 0.42   | 0.41                  | 0.00  | 0.68                  | 0.71425 | 0.95354 | -0.16                      | -0.27 | -0.07   | -0.01 | 0.49                  | -0.62                 | -0.33 |   |         |   |        |
| RPpos_382.2481_12.15   | RP    | pos        | 12.15           | 382.2481   |            |      | 4        |         | 0.13239                                 | 0.47007 | -0.27  | 0.06  | -0.09  | -0.55                 | 0.16  | -0.28                 | 0.00672 | 0.17372 | -0.47                      | -0.45 | -0.76   | -0.41 | -0.33                 | -0.29                 | -0.58 |   |         |   |        |
| HILICpos_382.2794_0.41 | HILIC | pos        | 0.41            | 382.2794   |            |      | 4        |         | 0.55406                                 | 0.80603 | -0.15  | 0.33  | 0.50   | 0.00                  | 0.07  | -0.16                 | 0.96611 | 0.99562 | -0.08                      | -0.03 | 0.15    | -0.16 | -0.05                 | -0.30                 | 0.44  |   |         |   |        |
| RPpos_382.2957_8.21    | RP    | pos        | 8.21            | 382.2957   |            |      | 4        |         | 0.07867                                 | 0.40139 | 0.21   | 0.25  | 0.71   | 0.26                  | 0.13  | 0.13                  | 0.78708 | 0.96713 | 0.07                       | 0.04  | 0.03    | -0.06 | -0.10                 | -0.09                 | -0.18 |   |         |   |        |
| RPneg_382.2958_10.362  | RP    | neg        | 10.362          | 382.2958   |            |      | 4        |         | 0.50550                                 | 0.77942 | 0.11   | 0.11  | 0.26   | 0.32                  | 0.39  | -0.10                 | 0.00082 | 0.2444  | 0.00                       | 0.75  | -0.78   | 0.06  | 0.82                  | 1.13                  | 0.83  |   |         |   |        |
| HILICpos_382.9706_7.15 | HILIC | pos        | 7.15            | 382.9706   |            |      | 4        |         | 0.31815                                 | 0.64524 | -0.15  | -0.08 | 0.22   | 0.20                  | -0.13 | -0.41                 | 0.42777 | 0.87241 | -0.06                      | -0.26 | -0.25   | 0.33  | 0.40                  | -0.65                 | -0.32 |   |         |   |        |
| HILICneg_382.9875_0.49 | HILIC | neg        | 0.49            | 382.9875   |            |      | 4        |         | 0.59781                                 | 0.82772 | -0.12  | 0.00  | 0.01   | -0.08                 | -0.12 | 0.14                  | 0.83189 | 0.97501 | -0.04                      | -0.02 | 0.00    | 0.07  | -0.08                 | -0.08                 | 0.19  |   |         |   |        |
| RPneg_383.02426_5.64   | RP    | neg        | 5.64            | 383.0243   |            |      | 4        |         | 0.02124                                 | 0.26263 | 0.21   | -0.15 | 0.35   | 0.40                  | 0.28  | -0.23                 | 0.55363 | 0.91827 | 0.22                       | 0.01  | -0.03   | 0.07  | 0.41                  | 0.54                  | 0.37  |   |         |   |        |
| RPpos_383.0423_5.63    | RP    | pos        | 5.63            | 383.0423   |            |      | 4        |         | 0.09247                                 | 0.42156 | 0.14   | -0.20 | 0.43   | 0.19                  | 0.23  | -0.27                 | 0.70964 | 0.95278 | 0.14                       | -0.14 | -0.02   | 0.02  | 0.27                  | 0.52                  | 0.08  |   |         |   |        |
| RPneg_383.04483_5.976  | RP    | neg        | 5.976           | 383.0448   |            |      | 4        |         | 0.55650                                 | 0.80760 | 0.15   | -0.07 | 0.39   | 0.35                  | 0.12  | -0.18                 | 0.06419 | 0.49157 | 0.99                       | 0.16  | 0.84    | 1.31  | 1.29                  | 2.39                  | -0.12 |   |         |   |        |
| HILICneg_383.0699_1.74 | HILIC | neg        | 1.74            | 383.0699   |            |      | 4        |         | 0.20766                                 | 0.55090 | -0.36  | -0.32 | -0.11  | -0.41                 | -0.15 | 0.66                  | 0.00012 | 0.01344 | -0.70                      | -0.63 | -0.57   | -0.42 | -0.69                 | -0.46                 | -1.41 |   |         |   |        |
| HILICneg_383.071_2.07  | HILIC | neg        | 2.07            | 383.0710   |            |      | 4        |         | 0.19044                                 | 0.53616 | -0.10  | -0.01 | 0.09   | 0.06                  | -0.04 | -0.27                 | 0.41789 | 0.86668 | 0.23                       | 0.41  | 0.52    | -0.17 | 0.55                  | 0.44                  | -0.02 |   |         |   |        |
| RPneg_383.07202_2.814  | RP    | neg        | 2.814           | 383.0720   |            |      | 4        |         | 0.64358                                 | 0.84910 | 0.10   | 0.31  | 0.47   | 0.28                  | 0.01  | -0.30                 | 0.05235 | 0.45459 | 0.59                       | 0.49  | 0.58    | 0.63  | 0.90                  | 0.39                  | 0.17  |   |         |   |        |
| HILICneg_383.1227_5.18 | HILIC | neg        | 5.18            | 383.1227   |            |      | 4        |         | 0.13578                                 | 0.47549 | 0.41   | 0.27  | 1.33   | 0.54                  | 0.17  | -0.61                 | 0.06716 | 0.49979 | 0.68                       | 0.17  | 0.89    | 1.24  | 0.61                  | 0.44                  | -0.37 |   |         |   |        |
| RPpos_383.141_10.07    | RP    | pos        | 10.07           | 383.1410   |            |      | 4        |         | 0.32834                                 | 0.65304 | -0.34  | -0.23 | 0.44   | 0.47                  | 0.44  | 0.73                  | 0.81152 | 0.97164 | 0.11                       | 16.42 | -0.29   | -0.36 | -0.46                 | 0.20                  | 1.01  |   |         |   |        |
| HILICneg_383.144_1.35  | HILIC | neg        | 1.35            | 383.1440   |            |      | 4        |         | 0.72539                                 | 0.88831 | -0.04  | -0.10 | 0.12   | -0.01                 | 0.13  | -0.19                 | 0.00020 | 0.02026 | 0.92                       | 0.75  | 0.83    | 0.74  | 1.07                  | 0.93                  | 0.93  |   |         |   |        |
| HILICpos_383.1474_5.92 | HILIC | pos        | 5.92            | 383.1474   |            |      | 4        |         | 0.63436                                 | 0.84494 | -0.11  | 0.21  | 0.52   | 0.24                  | -0.20 | -0.32                 | 0.05612 | 0.46774 | 0.41                       | 0.74  | 0.61    | 0.63  | 0.29                  | -0.12                 | -0.05 |   |         |   |        |
| HILICneg_383.1529_0.62 | HILIC | neg        | 0.62            | 383.1529   |            |      | 4        |         | 0.00449                                 | 0.33339 | 0.01   | -0.14 | 0.09   | 0.06                  | -0.05 | -0.03                 | 0.34468 | 0.82809 | 0.06                       | 0.04  | 0.05    | 0.00  | 0.09                  | 0.09                  | 0.17  |   |         |   |        |
| RPneg_383.15372_6.356  | RP    | neg        | 6.356           | 383.1537   |            |      | 4        |         | 0.40500                                 | 0.71200 | 0.02   | -0.03 | 0.04   | 0.02                  | 0.25  | -0.03                 | 0.28898 | 0.79431 | 0.06                       | 0.07  | 0.10    | 0.02  | 0.08                  | 0.05                  | 0.05  |   |         |   |        |
| RPneg_383.15393_7.254  | RP    | neg        | 7.254           | 383.1539   |            |      | 4        |         | 0.46728                                 | 0.75554 | 0.05   | 0.12  | 0.16   | 0.07                  | 0.39  | -0.09                 | 0.19429 | 0.70874 | 0.25                       | 0.24  | 0.25    | 0.30  | 0.25                  | 0.27                  | 0.16  |   |         |   |        |
| RPneg_383.15405_6.543  | RP    | neg        | 6.543           | 383.1541   |            |      | 4        |         | 0.08270                                 | 0.40785 | 0.33   | 0.19  | 0.44   | 0.36                  | 0.78  | 0.10                  | 0.39033 | 0.85135 | 0.17                       | 0.03  | 0.08    | 0.15  | 0.32                  | 0.25                  | 0.01  |   |         |   |        |
| RPneg_383.15408_7      | RP    | neg        | 7               | 383.1541   |            |      | 4        |         | 0.98856                                 | 0.99589 | 0.13   | 0.08  | 0.19   | 0.11                  | 0.46  | -0.02                 | 0.46104 | 0.88555 | 0.19                       | 0.02  | 0.24    | 0.23  | 0.23                  | 0.09                  | 0.22  |   |         |   |        |
| RPneg_383.15417_6.205  | RP    | neg        | 6.205           | 383.1542   |            |      | 4        |         | 0.01173                                 | 0.20801 | 0.72   | 0.58  | 1.02   | 0.69                  | 0.77  | 0.64                  | 0.27213 | 0.78288 | -0.30                      | -0.32 | -0.33   | -0.39 | -0.21                 | -0.15                 | -0.42 |   |         |   |        |
| RPneg_383.15433_5.713  | RP    | neg        | 5.713           | 383.1543   |            |      | 4        |         | 0.64459                                 | 0.84966 | 0.17   | 0.06  | 0.32   | 0.38                  | 0.40  | 0.20                  | 0.74606 | 0.96075 | -0.05                      | -0.06 | -0.02   | -0.11 | 0.02                  | 0.01                  | -0.08 |   |         |   |        |
| RPpos_383.167_10.83    | RP    | pos        | 10.83           | 383.1670   |            |      | 4        |         | 0.10751                                 | 0.44121 | 0.43   | 0.01  | 0.06   | 0.20                  | 1.28  | 0.21                  | 0.76174 | 0.96272 | 0.07                       | -0.05 | 0.23    | -0.09 | 0.17                  | 0.24                  | -0.12 |   |         |   |        |
| RPneg_383.17172_5.542  | RP    | neg        | 5.542           | 383.1717   |            |      | 4        |         | 0.00014                                 | 0.02271 | 0.51   | 0.19  | 0.71   | 1.16                  | 0.23  | -0.68                 | 0.25723 | 0.77268 | 0.52                       | -0.06 | 0.31    | 0.71  | 0.79                  | 0.50                  | 0.25  |   |         |   |        |
| RPneg_383.17401_10.759 | RP    | neg        | 10.759          | 383.1740   |            |      | 4        |         | 0.00915                                 | 0.18757 | 0.98   | -0.07 | 0.13   | 0.80                  | 2.26  | -0.22                 | 0.97738 | 0.99726 | -0.02                      | -0.12 | 0.54    | -0.21 | -0.25                 | -0.45                 | -0.09 |   |         |   |        |
| RPneg_383.1886_13.188  | RP    | neg        | 13.188          | 383.1886   |            |      | 4        |         | 0.11908                                 | 0.45534 | -0.41  | 0.02  | -0.61  | -0.14                 | 0.17  | -0.59                 | 0.50120 | 0.90228 | -0.07                      | 0.42  | -0.20   | -0.19 | -0.19                 | -0.02                 | 0.24  |   |         |   |        |
| RPneg_383.18996_11.57  | RP    | neg        | 11.57           | 383.1890   |            |      | 4        |         | 0.63116                                 | 0.84379 | -0.11  | 0.55  | 0.01   | -0.37                 | -0.01 | 0.25                  | 0.35009 | 0.83998 | -0.20                      | -0.12 | 0.23    | -0.78 | 0.04                  | -0.02                 | -0.26 |   |         |   |        |
| RPneg_383.18915_7.642  | RP    | neg        | 7.642           | 383.1892   |            |      | 4        |         | 0.95239                                 | 0.98259 | -0.06  | 0.11  | -0.08  | 0.00                  | -0.03 | -0.05                 | 0.56108 | 0.91988 | 0.04                       | 0.00  | 0.06    | 0.08  | 0.05                  | 0.04                  | -0.04 |   |         |   |        |
| RPneg_383.19168_4.249  | RP    | neg        | 4.249           | 383.1917   |            |      | 4        |         | 0.32605                                 | 0.69683 | 0.22   | 0.08  | 0.64   | 0.33                  | 0.54  | 0.25                  | 0.81966 | 0.97250 | -0.10                      | -0.19 | -0.04   | -0.11 | 0.09                  | -0.29                 | -0.28 |   |         |   |        |
| RPneg_383.1918_4.604   | RP    | neg        | 4.604           | 383.1918   |            |      | 4        |         | 0.02475                                 | 0.35900 | -0.42  | -0.29 | 0.31   | -0.35                 | -0.57 | -0.11                 | 0.54432 | 0.91524 | 0.46                       | 0.02  | 0.15    | -0.67 | 0.88                  | 0.20                  | 0.03  |   |         |   |        |
| RPneg_383.19189_4.08   | RP    | neg        | 4.08            | 383.1919   |            |      | 4        |         | 0.66053                                 | 0.85781 | 0.14   | 0.01  | 0.27   | 0.44                  | 0.24  | 0.33                  | 0.76306 | 0.96312 | 0.10                       | 0.28  | -0.11   | 0.09  | 0.53                  | -0.06                 | -0.30 |   |         |   |        |
| HILICneg_383.1925_1.88 | HILIC | neg        | 1.88            | 383.1925   |            |      | 4        |         | 0.28792                                 | 0.62150 | 0.28   | 0.15  | 0.64   | 0.08                  | 0.56  | 0.22                  | 0.93916 | 0.99076 | -0.05                      | -0.03 | 0.06    | -0.08 | 0.16                  | -0.29                 | -0.27 |   |         |   |        |
| HILICneg_383.1932_6.98 | HILIC | neg        | 6.98            | 383.1932   |            |      | 4        |         | 0.99866                                 | 0.99943 | -0.04  | 0.11  | 0.39   | 0.09                  | -0.05 | -0.57                 | 0.06165 | 0.48417 | 0.20                       | 0.27  | 0.35    | 0.50  | 0.10                  | -0.15                 | -0.24 |   |         |   |        |
| HILICpos_383.2254_5.12 | HILIC | pos        | 5.12            | 383.2254   |            |      | 4        |         | 0.71927                                 | 0.88562 | -0.16  | 0.44  | 0.41   | 0.20                  | 0.17  | 0.26                  | 0.00162 | 0.07662 | -0.33                      | -0.10 | -0.39   | -0.40 | -0.28                 | -0.07                 | -0.25 |   |         |   |        |
| RPneg_383.22897_11.245 | RP    | neg        | 11.245          | 383.2290   |            |      | 4        |         | 0.32660                                 | 0.65177 | -0.32  | 0.08  | -0.09  | 0.61                  | -0.34 | -0.17                 | 0.46208 | 0.88615 | -0.08                      | -0.07 | -0.19   | 0.01  | -0.14                 | -0.07                 | 0.61  |   |         |   |        |
| RPneg_383.22934_11.313 | RP    | neg        | 11.313          | 383.2293   |            |      | 4        |         | 0.35405                                 | 0.67344 | -0.29  | -0.07 | -0.07  | 0.35                  | -0.23 | 0.72                  | 0.56715 | 0.92089 | 0.15                       | 0.06  | -0.12   | 0.37  | 0.19                  | 0.16                  | 0.39  |   |         |   |        |
| RPpos_383.2433_10.83   | RP    | pos        | 10.83           | 383.2433   |            |      | 4        |         | 0.11369                                 | 0.44936 | 0.41   | -0.06 | 0.09   | 0.06                  | 1.57  | 0.16                  | 0.92302 | 0.98898 | 0.01                       | -0.06 | 0.03    | -0.18 | 0.39                  | 0.16                  | -0.01 |   |         |   |        |
| RPpos_383.2638_11.17   | RP    | pos        | 11.17           | 383.2638   |            |      | 4        |         | 0.00078                                 | 0.05619 | 1.33   | -0.05 | 0.63   | 1.51                  | 2.26  | -0.18                 | 0.82389 | 0.97343 | -0.09                      | -0.27 | 0.26    | -0.30 | -0.14                 | 0.05                  | -0.03 |   |         |   |        |
| RPneg_383.28067_13.185 | RP    | neg        | 13.185          | 383.2807   |            |      | 4        |         | 0.28901                                 | 0.62228 | -0.21  | 0.58  | 0.01   | -0.35                 | 0.13  | -0.47                 | 0.96101 | 0.99553 | 0.01                       | 0.64  | -0.10   | 0.18  | -0.08                 | -0.14                 | -0.16 |   |         |   |        |
| RPpos_383.2829_12.02   | RP    | pos        | 12.02           | 383.2829   |            |      | 4        |         | 0.15943                                 | 0.50297 | -0.27  | -0.10 | -0.05  | 0.00                  | 0.02  | 0.11                  | 0.80202 | 0.96981 | -0.06                      | -0.38 | -0.33   | -0.09 | 0.18                  | 0.05                  | 0.62  |   |         |   |        |
| HILICneg_383.2902_0.69 | HILIC | neg        | 0.69            | 383.2902   |            |      | 4        |         | 0.97679                                 | 0.99092 | 0.06   | -0.01 | 0.23   | 0.00                  | 0.29  | -0.08                 | 0.74791 | 0.96109 | -0.14                      | -0.24 | -0.30   | -0.06 | -0.15                 | 0.13                  | -0.13 |   |         |   |        |
| RPneg_383.29126_10.341 | RP    | neg        | 10.341          | 383.2913   |            |      | 4        |         | 0.80826                                 | 0.92638 | 0.04   | 0.24  | 0.19   | 0.06                  | 0.30  | 0.20                  | 0.98902 | 0.99810 | -0.07                      | -0.11 | -0.01   | -0.40 | 0.01                  | -0.01                 | 0.19  |   |         |   |        |
| RPneg_383.29623_11.492 | RP    | neg        | 11.492          | 383.2962   |            |      | 4        |         | 0.05296                                 | 0.35197 | 0.27   | 0.56  | 0.31   | -0.07                 | 0.83  | -0.04                 | 0.78718 | 0.96713 | -0.04                      | -0.01 | 0.19    | -0.09 | 0.02                  | -0.12                 | -0.14 |   |         |   |        |
| RPpos_383.3302_12.8    | RP    | pos        | 12.8            | 383.3302   |            |      | 4        |         | 0.29995                                 | 0.62947 | -0.01  | 0.44  | 0.06   | 0.26                  | 0.00  | -0.14                 | 0.57466 | 0.92285 | -0.11                      | 0.00  | 0.01    | -0.33 | 0.02                  | -0.34                 | 0.10  |   |         |   |        |
| RPpos_383.331_10.03    | RP    | pos        | 10.03           | 383.3310   |            |      | 4        |         | 0.02948                                 | 0.29125 | -0.47  | -0.01 | -0.60  | -0.52                 | -0.02 | -0.27                 | 0.01863 | 0.29018 | -0.82                      | -0.83 | -0.50   | -0.67 | -0.59                 | -1.01                 | 0.02  |   |         |   |        |
| RPpos_383.3988_11.58   | RP    | pos        | 11.58           | 383.3988   |            |      |          |         |                                         |         |        |       |        |                       |       |                       |         |         |                            |       |         |       |                       |                       |       |   |         |   |        |

| Feature_ID             | Mode  | Ionization | Average_Rt.min. | Average_Mz | Metabolite           | MSMS        | HMDB_ID | IV-Alcohol self-administration (IV-ASA) |         |       |       |       |       |          |         |         |                       |       |       |       | IV-Alcohol clamp (IV-AC) |       |       |                            |       |   |          |   |   |         |   |   |                       |   |   |   |       |   |   |         |   |   |        |   |   |
|------------------------|-------|------------|-----------------|------------|----------------------|-------------|---------|-----------------------------------------|---------|-------|-------|-------|-------|----------|---------|---------|-----------------------|-------|-------|-------|--------------------------|-------|-------|----------------------------|-------|---|----------|---|---|---------|---|---|-----------------------|---|---|---|-------|---|---|---------|---|---|--------|---|---|
|                        |       |            |                 |            |                      |             |         | Area Under the Curve (AUC)              |         |       |       |       |       | Baseline |         |         | IV-Ghrelin or Placebo |       |       |       | BrAc=0                   |       |       | Area Under the Curve (AUC) |       |   | Baseline |   |   | Post-LD |   |   | IV-Ghrelin or Placebo |   |   |   | IV-AC |   |   | Post-AC |   |   | BrAc=0 |   |   |
|                        |       |            |                 |            |                      |             |         | p                                       | q       | d     | d     | d     | d     | d        | d       | d       | d                     | d     | d     | d     | p                        | q     | d     | d                          | d     | d | d        | d | d | d       | d | d | d                     | d | d | d | d     | d | d | d       | d | d | d      | d | d |
| RPneg_385.16925_6.748  | RP    | neg        | 6.748           | 385.16925  |                      |             |         | 0.21535                                 | 0.55799 | 0.19  | 0.01  | 0.46  | 0.24  | 0.34     | 0.03    | 0.87451 | 0.98203               | -0.01 | -0.09 | -0.04 | 0.00                     | 0.06  | 0.05  | 0.05                       | -0.08 |   |          |   |   |         |   |   |                       |   |   |   |       |   |   |         |   |   |        |   |   |
| RPneg_385.16925_7.717  | RP    | neg        | 7.717           | 385.1693   |                      |             |         | 0.14064                                 | 0.48056 | -0.01 | 0.07  | 0.14  | 0.00  | 0.12     | -0.13   | 0.31340 | 0.81132               | 0.15  | 0.07  | 0.22  | 0.10                     | 0.19  | 0.16  | 0.16                       | 0.14  |   |          |   |   |         |   |   |                       |   |   |   |       |   |   |         |   |   |        |   |   |
| HILICneg_385.1693_0.63 | HILIC | neg        | 0.63            | 385.1693   |                      |             |         | 0.28755                                 | 0.62115 | 0.12  | 0.00  | 0.34  | 0.08  | 0.24     | -0.04   | 0.81790 | 0.97238               | 0.08  | 0.03  | 0.06  | 0.16                     | 0.12  | 0.00  | 0.11                       |       |   |          |   |   |         |   |   |                       |   |   |   |       |   |   |         |   |   |        |   |   |
| RPneg_385.16949_5.593  | RP    | neg        | 5.593           | 385.1695   |                      |             |         | 0.92630                                 | 0.97354 | -0.02 | -0.07 | 0.01  | -0.09 | 0.09     | 0.15    | 0.09347 | 0.56090               | 0.13  | 0.17  | 0.14  | 0.09                     | 0.17  | 0.08  | 0.12                       |       |   |          |   |   |         |   |   |                       |   |   |   |       |   |   |         |   |   |        |   |   |
| HILICneg_385.1696_0.76 | HILIC | neg        | 0.76            | 385.1696   |                      |             |         | 0.03930                                 | 0.3765  | -0.18 | 0.26  | -0.20 | -0.08 | 0.11     | 0.04    | 0.36345 | 0.83744               | -0.14 | 0.14  | 0.22  | 0.13                     | 0.04  | 0.15  | 0.24                       |       |   |          |   |   |         |   |   |                       |   |   |   |       |   |   |         |   |   |        |   |   |
| RPneg_385.1696_5.916   | RP    | neg        | 5.916           | 385.1696   |                      |             |         | 0.42424                                 | 0.72599 | 0.13  | 0.38  | 0.13  | 0.18  | 0.56     | 0.46066 | 0.85253 | -0.13                 | 0.36  | 0.16  | 0.16  | 0.09                     | 0.07  | 0.07  |                            |       |   |          |   |   |         |   |   |                       |   |   |   |       |   |   |         |   |   |        |   |   |
| HILICpos_385.183_1.33  | HILIC | pos        | 1.33            | 385.1830   |                      |             |         | 0.09384                                 | 0.42301 | -0.52 | 0.24  | -0.34 | -0.16 | -0.28    | -0.69   | 0.60968 | 0.93019               | 0.26  | 0.54  | 0.06  | 0.04                     | 0.15  | 0.22  | 0.11                       |       |   |          |   |   |         |   |   |                       |   |   |   |       |   |   |         |   |   |        |   |   |
| HILICneg_385.1897_6.98 | HILIC | neg        | 6.98            | 385.1897   |                      |             |         | 0.88792                                 | 0.95899 | -0.07 | 0.12  | 0.42  | 0.12  | -0.14    | -0.57   | 0.04227 | 0.41586               | 0.20  | 0.17  | 0.16  | 0.56                     | 0.28  | -0.17 | -0.17                      |       |   |          |   |   |         |   |   |                       |   |   |   |       |   |   |         |   |   |        |   |   |
| RPpos_385.198_6.9      | RP    | pos        | 6.9             | 385.1980   | fragment of cortisol | no autoMSMS |         | 7.15E-08                                | 0.00027 | 2.53  | 0.07  | 2.80  | 2.17  | 4.14     | -0.44   | 0.00000 | 0.00000               | 2.82  | -0.03 | 2.50  | 3.15                     | 2.91  | 2.94  | -0.29                      |       |   |          |   |   |         |   |   |                       |   |   |   |       |   |   |         |   |   |        |   |   |
| RPpos_385.1991_9.63    | RP    | pos        | 9.63            | 385.1991   |                      |             |         | 0.71640                                 | 0.88458 | 0.15  | 0.30  | 0.63  | -0.10 | 0.88     | -0.07   | 0.22643 | 0.74342               | -0.69 | -0.20 | -0.20 | -0.50                    | -0.31 | -1.07 | 0.49                       |       |   |          |   |   |         |   |   |                       |   |   |   |       |   |   |         |   |   |        |   |   |
| RPneg_385.20578_8.504  | RP    | neg        | 8.504           | 385.2058   |                      |             |         | 0.82837                                 | 0.93503 | -0.06 | -0.03 | -0.12 | 0.13  | 0.11     | 0.41    | 0.09708 | 0.56762               | 2.55  | 2.39  | 1.98  | 2.90                     | 2.42  | 2.52  | 2.26                       |       |   |          |   |   |         |   |   |                       |   |   |   |       |   |   |         |   |   |        |   |   |
| RPpos_385.2067_4.26    | RP    | pos        | 4.26            | 385.2067   |                      |             |         | 0.22542                                 | 0.56723 | 0.35  | 0.22  | 0.70  | 0.26  | 0.80     | 0.59    | 0.84757 | 0.97724               | -0.08 | -0.06 | 0.04  | -0.21                    | 0.01  | -0.13 | -0.29                      |       |   |          |   |   |         |   |   |                       |   |   |   |       |   |   |         |   |   |        |   |   |
| RPneg_385.23911_8.385  | RP    | neg        | 8.385           | 385.2391   |                      |             |         | 0.06561                                 | 0.37687 | -0.25 | -0.24 | -0.20 | -0.17 | -0.17    | -0.18   | 0.94506 | 0.99216               | -0.06 | -0.06 | 0.01  | -0.03                    | -0.07 | -0.07 | -0.08                      |       |   |          |   |   |         |   |   |                       |   |   |   |       |   |   |         |   |   |        |   |   |
| HILICpos_385.2572_0.37 | HILIC | pos        | 0.37            | 385.2572   |                      |             |         | 0.94634                                 | 0.98034 | 0.08  | 0.39  | 0.57  | 0.04  | 0.42     | -0.29   | 0.78900 | 0.96713               | -0.23 | -0.10 | 0.31  | -0.20                    | 0.19  | -0.17 | -0.85                      |       |   |          |   |   |         |   |   |                       |   |   |   |       |   |   |         |   |   |        |   |   |
| RPpos_385.2589_10.3    | RP    | pos        | 10.3            | 385.2589   |                      |             |         | 0.31716                                 | 0.64451 | 0.32  | 0.44  | 0.57  | 0.26  | 0.64     | -0.10   | 0.84724 | 0.97724               | -0.20 | -0.16 | 0.25  | -0.11                    | -0.09 | -0.09 | -0.91                      |       |   |          |   |   |         |   |   |                       |   |   |   |       |   |   |         |   |   |        |   |   |
| RPpos_385.2628_11.18   | RP    | pos        | 11.18           | 385.2628   |                      |             |         | 0.00565                                 | 0.14723 | 1.15  | -0.07 | 0.55  | 1.26  | 3.25     | -0.54   | 0.88269 | 0.98281               | 0.02  | -0.10 | 0.27  | -0.20                    | 0.06  | 0.00  | 0.06                       |       |   |          |   |   |         |   |   |                       |   |   |   |       |   |   |         |   |   |        |   |   |
| RPneg_385.31161_11.751 | RP    | neg        | 11.751          | 385.3116   |                      |             |         | 0.26223                                 | 0.59983 | 0.10  | 0.58  | 0.03  | -0.06 | 0.68     | -0.59   | 0.17397 | 0.68773               | 0.59  | 0.66  | 0.76  | 0.40                     | 0.74  | 0.44  | -0.14                      |       |   |          |   |   |         |   |   |                       |   |   |   |       |   |   |         |   |   |        |   |   |
| RPpos_385.4148_12      | RP    | pos        | 12              | 385.4148   |                      |             |         | 0.93426                                 | 0.97639 | 0.02  | 0.14  | 0.19  | 0.15  | 0.07     | -0.64   | 0.73597 | 0.94595               | 0.00  | 1.03  | -0.22 | 0.17                     | -0.53 | 0.04  | 0.15                       |       |   |          |   |   |         |   |   |                       |   |   |   |       |   |   |         |   |   |        |   |   |
| RPpos_385.7546_12.89   | RP    | pos        | 12.89           | 385.7546   |                      |             |         | 0.50537                                 | 0.77940 | 0.08  | 0.26  | -0.08 | -0.12 | 0.15     | 0.10    | 0.71080 | 0.95282               | 0.08  | 0.25  | -0.07 | 0.43                     | 0.03  | -0.04 | -0.03                      |       |   |          |   |   |         |   |   |                       |   |   |   |       |   |   |         |   |   |        |   |   |
| HILICpos_385.9014_7.9  | HILIC | pos        | 7.9             | 385.9014   |                      |             |         | 0.22342                                 | 0.56486 | -0.38 | 0.12  | -0.66 | 0.39  | 0.20     | 0.28    | 0.94179 | 0.99159               | -0.01 | 0.08  | 0.09  | 0.47                     | 0.73  | 0.36  | 0.37                       |       |   |          |   |   |         |   |   |                       |   |   |   |       |   |   |         |   |   |        |   |   |
| RPneg_385.99683_2.112  | RP    | neg        | 2.112           | 385.9968   |                      |             |         | 0.32501                                 | 0.65078 | -0.30 | 0.27  | 0.71  | 0.04  | -0.44    | -0.79   | 0.00011 | 0.01291               | 1.11  | 0.70  | 2.46  | 2.73                     | 1.30  | 0.47  | -0.01                      |       |   |          |   |   |         |   |   |                       |   |   |   |       |   |   |         |   |   |        |   |   |
| RPneg_386.10413_10.046 | RP    | neg        | 10.046          | 386.1041   |                      |             |         | 0.75359                                 | 0.90229 | 0.09  | -0.10 | 0.33  | 0.38  | 1.07     | -0.30   | 0.12937 | 0.62281               | 0.25  | 0.32  | 0.34  | -0.06                    | 0.93  | 0.55  | 0.28                       |       |   |          |   |   |         |   |   |                       |   |   |   |       |   |   |         |   |   |        |   |   |
| HILICpos_386.1075_6.94 | HILIC | pos        | 6.94            | 386.1075   |                      |             |         | 0.94182                                 | 0.97871 | -0.02 | 0.59  | 0.04  | 0.17  | 0.25     | -0.18   | 0.19286 | 0.70820               | 0.26  | 0.02  | 0.13  | 0.64                     | 0.25  | -0.09 | 0.18                       |       |   |          |   |   |         |   |   |                       |   |   |   |       |   |   |         |   |   |        |   |   |
| RPneg_386.14096_10.879 | RP    | neg        | 10.879          | 386.1410   |                      |             |         | 0.94783                                 | 0.98073 | -0.02 | -0.10 | -0.21 | 0.82  | 0.35     | 0.24    | 0.24805 | 0.76454               | -0.04 | -0.15 | -0.01 | -0.17                    | -0.31 | 0.16  | 0.39                       |       |   |          |   |   |         |   |   |                       |   |   |   |       |   |   |         |   |   |        |   |   |
| HILICpos_386.179_2.43  | HILIC | pos        | 2.43            | 386.1790   |                      |             |         | 0.80426                                 | 0.92469 | 0.02  | 0.06  | 0.64  | 0.08  | 0.17     | -0.19   | 0.05303 | 0.45640               | 0.56  | 0.45  | 0.58  | 0.91                     | 0.97  | -0.09 | -0.24                      |       |   |          |   |   |         |   |   |                       |   |   |   |       |   |   |         |   |   |        |   |   |
| HILICpos_386.22_0.8    | HILIC | pos        | 0.8             | 386.2200   |                      |             |         | 0.33721                                 | 0.66020 | 0.31  | 0.04  | 0.60  | 0.46  | 0.65     | 0.38    | 0.74191 | 0.95997               | -0.13 | -0.18 | -0.04 | -0.22                    | -0.01 | -0.30 | -0.20                      |       |   |          |   |   |         |   |   |                       |   |   |   |       |   |   |         |   |   |        |   |   |
| RPpos_386.2383_5.83    | RP    | pos        | 5.83            | 386.2383   |                      |             |         | 0.83831                                 | 0.93922 | -0.02 | -0.24 | 0.42  | -0.02 | 0.38     | 0.85    | 0.50156 | 0.90262               | -0.20 | -0.20 | -0.19 | -0.17                    | 0.05  | -0.35 | -0.35                      |       |   |          |   |   |         |   |   |                       |   |   |   |       |   |   |         |   |   |        |   |   |
| HILICpos_386.2383_1.84 | HILIC | pos        | 1.84            | 386.2383   |                      |             |         | 0.62070                                 | 0.83898 | 0.12  | -0.07 | 0.60  | 0.13  | 0.46     | 0.21    | 0.94804 | 0.99302               | -0.02 | -0.01 | 0.13  | -0.09                    | 0.18  | -0.33 | -0.33                      |       |   |          |   |   |         |   |   |                       |   |   |   |       |   |   |         |   |   |        |   |   |
| RPneg_386.2543_7.857   | RP    | neg        | 7.857           | 386.2543   |                      |             |         | 0.36988                                 | 0.68609 | 0.33  | 0.10  | 0.31  | 0.44  | 0.76     | 0.01    | 0.23625 | 0.75426               | 0.33  | 0.82  | 0.49  | 0.36                     | -0.04 | 0.15  | -0.08                      |       |   |          |   |   |         |   |   |                       |   |   |   |       |   |   |         |   |   |        |   |   |
| RPneg_386.25516_7.731  | RP    | neg        | 7.731           | 386.2552   |                      |             |         | 0.24201                                 | 0.58268 | 0.59  | 0.24  | 0.33  | 0.47  | 1.27     | 0.08    | 0.51854 | 0.90847               | 0.40  | 0.33  | 0.26  | 0.51                     | 0.48  | 0.03  | -0.08                      |       |   |          |   |   |         |   |   |                       |   |   |   |       |   |   |         |   |   |        |   |   |
| RPpos_386.2565_6.49    | RP    | pos        | 6.49            | 386.2565   |                      |             |         | 0.69253                                 | 0.87374 | -0.17 | -0.35 | 0.47  | 0.46  | -0.53    | 0.39    | 0.38195 | 0.84832               | -0.32 | -0.23 | -0.28 | -0.24                    | 0.08  | -0.35 | -0.37                      |       |   |          |   |   |         |   |   |                       |   |   |   |       |   |   |         |   |   |        |   |   |
| HILICpos_386.2743_0.49 | HILIC | pos        | 0.49            | 386.2743   |                      |             |         | 0.30432                                 | 0.63364 | -0.27 | -0.08 | 0.40  | 0.06  | -0.18    | -0.29   | 0.81658 | 0.97221               | -0.12 | -0.40 | -0.07 | 0.43                     | -0.03 | -0.37 | -0.45                      |       |   |          |   |   |         |   |   |                       |   |   |   |       |   |   |         |   |   |        |   |   |
| RPpos_386.2749_6.14    | RP    | pos        | 6.14            | 386.2749   |                      |             |         | 0.45224                                 | 0.74541 | -0.38 | -0.33 | 0.63  | -0.02 | -0.15    | 0.30    | 0.43558 | 0.87638               | -0.31 | -0.13 | -0.02 | -0.31                    | -0.24 | -0.84 | -0.84                      |       |   |          |   |   |         |   |   |                       |   |   |   |       |   |   |         |   |   |        |   |   |
| RPpos_386.2899_8.01    | RP    | pos        | 8.01            | 386.2899   |                      |             |         | 0.17525                                 | 0.52072 | 0.51  | 0.18  | 0.82  | 0.39  | 0.87     | 0.35    | 0.17122 | 0.68410               | 0.43  | 0.34  | 0.33  | 0.79                     | 0.37  | 0.16  | 0.12                       |       |   |          |   |   |         |   |   |                       |   |   |   |       |   |   |         |   |   |        |   |   |
| HILICpos_386.2904_0.89 | HILIC | pos        | 0.89            | 386.2904   |                      |             |         | 0.24561                                 | 0.58617 | 0.41  | 0.22  | 0.57  | 0.31  | 1.27     | -0.16   | 0.11423 | 0.59832               | 0.59  | 0.42  | 0.81  | 0.59                     | 0.30  | 0.62  | -0.09                      |       |   |          |   |   |         |   |   |                       |   |   |   |       |   |   |         |   |   |        |   |   |
| RPpos_386.2907_7.94    | RP    | pos        | 7.94            | 386.2907   |                      |             |         | 0.71389                                 | 0.88347 | 0.08  | 0.01  | 0.34  | 0.31  | 0.40     | -0.19   | 0.00590 | 0.16216               | 0.81  | 0.76  | 0.78  | 0.62                     | 0.91  | 0.76  | -0.01                      |       |   |          |   |   |         |   |   |                       |   |   |   |       |   |   |         |   |   |        |   |   |
| RPpos_386.3047_10.84   | RP    | pos        | 10.84           | 386.3047   |                      |             |         | 0.27760                                 | 0.61209 | 0.17  | 0.18  | -0.15 | -0.12 | 1.76     | 0.49    | 0.23999 | 0.75656               | 0.68  | 1.49  | -0.11 | 1.76                     | 0.95  | 0.48  | -0.02                      |       |   |          |   |   |         |   |   |                       |   |   |   |       |   |   |         |   |   |        |   |   |
| HILICpos_386.3254_0.38 | HILIC | pos        | 0.38            | 386.3254   |                      |             |         | 0.50576                                 | 0.77956 | -0.29 | -0.07 | -0.16 | -0.04 | 0.03     | -0.55   | 0.52398 | 0.                    |       |       |       |                          |       |       |                            |       |   |          |   |   |         |   |   |                       |   |   |   |       |   |   |         |   |   |        |   |   |

| Feature_ID             | Mode  | Ionization | Average_Rt.min. | Average_Mz | Metabolite | MSMS | ID_Level | HMDB_ID | IV-Alcohol self-administration (IV-ASA) |         |       |          |       |       |                       |       |         |         |       | IV-Alcohol clamp (IV-AC) |       |       |                            |       |       |          |         |         |         |       |       |                       |       |         |         |         |        |       |       |       |       |       |      |   |   |
|------------------------|-------|------------|-----------------|------------|------------|------|----------|---------|-----------------------------------------|---------|-------|----------|-------|-------|-----------------------|-------|---------|---------|-------|--------------------------|-------|-------|----------------------------|-------|-------|----------|---------|---------|---------|-------|-------|-----------------------|-------|---------|---------|---------|--------|-------|-------|-------|-------|-------|------|---|---|
|                        |       |            |                 |            |            |      |          |         | Area Under the Curve (AUC)              |         |       | Baseline |       |       | IV-Ghrelin or Placebo |       |         |         |       | BraC=0                   |       |       | Area Under the Curve (AUC) |       |       | Baseline |         |         | Post-LD |       |       | IV-Ghrelin or Placebo |       |         |         |         | BraC=0 |       |       |       |       |       |      |   |   |
|                        |       |            |                 |            |            |      |          |         | p                                       | q       | d     | d        | d     | d     | d                     | d     | d       | d       | d     | d                        | d     | d     | d                          | d     | d     | d        | d       | d       | d       | d     | d     | d                     | d     | d       | d       | d       | d      | d     | d     | d     | d     | d     | d    | d | d |
|                        |       |            |                 |            |            |      |          |         | 0.24556                                 | 0.58617 | 0.30  | 0.05     | 0.40  | 0.94  | 0.58                  | 0.09  | 0.44492 | 0.88012 | 0.17  | -0.37                    | -0.13 | 0.19  | 0.59                       | 0.42  | -0.01 | 0.34859  | 0.83042 | 1.00    | 0.92    | 0.96  | 1.10  | 0.98                  | 0.95  | 1.10    | 0.95058 | 0.99346 | -0.03  | -0.27 | 0.33  | -2.09 | -0.13 | 0.08  | 0.15 |   |   |
| RPneg_389.09067_5.706  | RP    | neg        | 5.706           | 389.0907   |            |      | 4        |         | 0.30318                                 | 0.63234 | 0.01  | 0.01     | 0.06  | -0.01 | -0.01                 | 0.08  | 0.44492 | 0.88012 | 1.00  | 0.92                     | 0.96  | 1.10  | 0.98                       | 0.95  | 1.10  | 0.95058  | 0.99346 | -0.03   | -0.27   | 0.33  | -2.09 | -0.13                 | 0.08  | 0.15    |         |         |        |       |       |       |       |       |      |   |   |
| RPneg_389.19714_9.752  | RP    | neg        | 9.752           | 389.1971   |            |      | 4        |         | 0.00961                                 | 0.19097 | 0.88  | 0.08     | 0.43  | 1.03  | 2.02                  | -0.24 | 0.95058 | 0.99346 | -0.03 | -0.27                    | 0.33  | -2.09 | -0.13                      | 0.08  | 0.15  | 0.95058  | 0.99346 | -0.03   | -0.27   | 0.33  | -2.09 | -0.13                 | 0.08  | 0.15    |         |         |        |       |       |       |       |       |      |   |   |
| RPpos_389.2152_6.26    | RP    | pos        | 6.26            | 389.2152   |            |      | 4        |         | 0.73593                                 | 0.89350 | -0.10 | -0.27    | 0.41  | -0.10 | -0.12                 | 0.32  | 0.95058 | 0.99346 | -0.03 | -0.27                    | 0.33  | -2.09 | -0.13                      | 0.08  | 0.15  | 0.95058  | 0.99346 | -0.03   | -0.27   | 0.33  | -2.09 | -0.13                 | 0.08  | 0.15    |         |         |        |       |       |       |       |       |      |   |   |
| RPpos_389.2368_7.49    | RP    | pos        | 7.49            | 389.2368   |            |      | 4        |         | 0.47895                                 | 0.75152 | -0.13 | 0.03     | 0.06  | -0.54 | -0.69                 | 0.69  | 0.95058 | 0.99346 | -0.03 | -0.27                    | 0.33  | -2.09 | -0.13                      | 0.08  | 0.15  | 0.95058  | 0.99346 | -0.03   | -0.27   | 0.33  | -2.09 | -0.13                 | 0.08  | 0.15    |         |         |        |       |       |       |       |       |      |   |   |
| RPneg_389.2454_10.626  | RP    | neg        | 10.626          | 389.2454   |            |      | 4        |         | 0.71203                                 | 0.88540 | 0.12  | -0.38    | 0.40  | 0.80  | 0.16                  | 0.31  | 0.20941 | 0.74591 | 0.33  | 0.16                     | 0.07  | 0.23  | 0.33                       | 0.12  | 0.36  | 0.11     | 0.27998 | 0.98884 | -0.06   | -0.01 | 0.12  | 0.07                  | 0.11  | 0.65    | -0.38   |         |        |       |       |       |       |       |      |   |   |
| RPpos_389.2537_9.55    | RP    | pos        | 9.55            | 389.2537   |            |      | 4        |         | 0.21413                                 | 0.55659 | 0.46  | 0.96     | 0.58  | 0.16  | 0.70                  | 0.19  | 0.47015 | 0.89029 | -0.40 | -0.36                    | -0.07 | -0.24 | -0.24                      | -0.57 | 0.68  | 0.10802  | 0.58703 | -0.85   | -0.51   | -0.19 | -0.28 | -0.22                 | -0.96 | 0.11    |         |         |        |       |       |       |       |       |      |   |   |
| RPpos_389.254_9.76     | RP    | pos        | 9.76            | 389.2540   |            |      | 4        |         | 0.23962                                 | 0.58092 | 0.39  | 0.89     | 0.71  | 0.18  | 0.88                  | -0.15 | 0.10802 | 0.58703 | -0.85 | -0.51                    | -0.19 | -0.28 | -0.24                      | -0.57 | 0.68  | 0.10802  | 0.58703 | -0.85   | -0.51   | -0.19 | -0.28 | -0.22                 | -0.96 | 0.11    |         |         |        |       |       |       |       |       |      |   |   |
| RPpos_389.2684_8.94    | RP    | pos        | 8.94            | 389.2684   |            |      | 4        |         | 0.00693                                 | 0.16431 | -0.65 | -0.35    | -0.28 | -0.26 | -0.42                 | -0.14 | 0.02608 | 0.34098 | -0.42 | -0.40                    | -0.11 | -0.48 | -0.51                      | -0.61 | -0.33 | 0.00528  | 0.15286 | 0.25    | 0.02    | 0.55  | 0.30  | 0.04                  | 0.38  | 0.26    |         |         |        |       |       |       |       |       |      |   |   |
| RPneg_389.26898_9.778  | RP    | neg        | 9.778           | 389.2690   |            |      | 4        |         | 0.00532                                 | 0.14386 | 0.91  | 1.02     | 1.05  | 0.86  | 1.34                  | 0.78  | 0.00528 | 0.15286 | 0.25  | 0.02                     | 0.55  | 0.30  | 0.04                       | 0.38  | 0.26  | 0.16828  | 0.67938 | -0.34   | -0.44   | -0.37 | -0.37 | -0.28                 | -0.35 | -0.33   |         |         |        |       |       |       |       |       |      |   |   |
| RPneg_389.26962_8.501  | RP    | neg        | 8.501           | 389.2696   |            |      | 4        |         | 0.13267                                 | 0.47067 | 0.32  | 0.04     | 0.42  | 0.32  | 0.77                  | 0.01  | 0.16828 | 0.67938 | -0.34 | -0.44                    | -0.37 | -0.37 | -0.28                      | -0.35 | -0.33 | 0.91775  | 0.98823 | -0.03   | -0.15   | 0.04  | 0.06  | 0.01                  | 0.02  | 0.01    |         |         |        |       |       |       |       |       |      |   |   |
| RPneg_389.26974_10.409 | RP    | neg        | 10.409          | 389.2697   |            |      | 4        |         | 0.00302                                 | 0.11326 | 0.89  | 0.37     | 1.42  | 0.82  | 1.01                  | 1.04  | 0.16828 | 0.67938 | -0.34 | -0.44                    | -0.37 | -0.37 | -0.28                      | -0.35 | -0.33 | 0.77057  | 0.96458 | 0.10    | -0.17   | 0.15  | 0.11  | 0.09                  | 0.24  | 0.15    |         |         |        |       |       |       |       |       |      |   |   |
| RPneg_389.27008_9.549  | RP    | neg        | 9.549           | 389.2701   |            |      | 4        |         | 0.17526                                 | 0.52072 | -0.30 | -0.39    | 0.10  | 0.34  | 0.00                  | 0.43  | 0.48828 | 0.89812 | -0.15 | -0.28                    | -0.18 | -0.78 | 0.02                       | 0.19  | 0.51  | 0.00055  | 0.03928 | -0.57   | -0.49   | -0.57 | -0.73 | -0.49                 | -0.43 | -0.35   |         |         |        |       |       |       |       |       |      |   |   |
| RPpos_389.311_11.52    | RP    | pos        | 11.52           | 389.3110   |            |      | 4        |         | 0.36437                                 | 0.68205 | 0.29  | 0.61     | 0.80  | 0.32  | 0.17                  | -0.44 | 0.06701 | 0.49920 | 0.86  | 1.08                     | 0.68  | 0.75  | 1.00                       | 0.54  | 0.27  | 0.15980  | 0.50328 | -0.17   | 0.17    | 0.50  | -0.14 | -0.45                 | -0.69 | 0.69685 | 0.95093 | 0.04    | -0.06  | 0.07  | 0.22  | 0.20  | -0.12 | -0.24 |      |   |   |
| HILICneg_389.6694_1.45 | HILIC | neg        | 1.45            | 389.6694   |            |      | 4        |         | 0.57405                                 | 0.81586 | -0.15 | 0.07     | -0.04 | -0.10 | 0.05                  | 0.49  | 0.00055 | 0.03928 | -0.57 | -0.49                    | -0.57 | -0.73 | -0.49                      | -0.43 | -0.35 | 0.66701  | 0.49920 | 0.86    | 1.08    | 0.68  | 0.75  | 1.00                  | 0.54  | 0.27    | 0.15980 | 0.50328 | -0.17  | 0.17  | 0.50  | -0.14 | -0.45 | -0.69 |      |   |   |
| HILICpos_390.0122_5.8  | HILIC | pos        | 5.8             | 390.0122   |            |      | 4        |         | 0.15980                                 | 0.50328 | -0.17 | 0.17     | 0.50  | -0.14 | -0.45                 | -0.69 | 0.69685 | 0.95093 | 0.04  | -0.06                    | 0.07  | 0.22  | 0.20                       | -0.12 | -0.24 | 0.66701  | 0.49920 | 0.86    | 1.08    | 0.68  | 0.75  | 1.00                  | 0.54  | 0.27    | 0.15980 | 0.50328 | -0.17  | 0.17  | 0.50  | -0.14 | -0.45 | -0.69 |      |   |   |
| RPneg_390.01584_2.811  | RP    | neg        | 2.811           | 390.0158   |            |      | 4        |         | 0.50634                                 | 0.78001 | -0.16 | 0.09     | 0.72  | -0.02 | -0.57                 | -0.42 | 0.69707 | 0.95101 | -0.17 | -0.33                    | -0.03 | 0.01  | -0.06                      | -0.33 | -0.43 | 0.16619  | 0.51153 | 0.27    | 0.13    | 0.49  | 0.53  | 0.22                  | 0.76  | 0.35839 | 0.83442 | 0.07    | -0.04  | 0.16  | 0.23  | 0.53  | 0.10  |       |      |   |   |
| HILICneg_390.0435_0.66 | HILIC | neg        | 0.66            | 390.0435   |            |      | 4        |         | 0.16619                                 | 0.51153 | 0.27  | 0.13     | 0.49  | 0.53  | 0.22                  | 0.76  | 0.35839 | 0.83442 | 0.07  | -0.04                    | 0.16  | 0.23  | 0.53                       | 0.10  | -0.35 | 0.31173  | 0.63983 | 0.65    | 0.80    | 0.98  | 0.51  | 0.88                  | 0.98  | 0.44734 | 0.88074 | -0.19   | -0.14  | -0.20 | 0.12  | -0.21 | -0.18 | -0.36 |      |   |   |
| RPneg_390.05856_3.177  | RP    | neg        | 3.177           | 390.0586   |            |      | 4        |         | 0.30589                                 | 0.63469 | 1.32  | 1.09     | 1.32  | 1.51  | 1.16                  | 2.92  | 0.27298 | 0.78352 | -0.22 | -0.25                    | -0.21 | -0.22 | -0.20                      | -0.21 | -0.24 | 0.85113  | 0.92958 | 0.28    | 0.56    | 0.37  | 0.21  | 0.41                  | -0.39 | 0.21568 | 0.73202 | 0.51    | 0.73   | 0.58  | 0.70  | 0.11  | 0.46  | -0.19 |      |   |   |
| HILICneg_390.1136_0.55 | HILIC | neg        | 0.55            | 390.1136   |            |      | 4        |         | 0.85113                                 | 0.92958 | 0.28  | 0.56     | 0.37  | 0.21  | 0.41                  | -0.39 | 0.21568 | 0.73202 | 0.51  | 0.73                     | 0.58  | 0.70  | 0.11                       | 0.46  | -0.19 | 0.52709  | 0.79176 | -0.10   | 0.06    | 0.20  | 0.19  | 0.24                  | -0.02 | 0.95516 | 0.99429 | 0.02    | -0.25  | -0.56 | -0.21 | 0.15  | 0.16  | 0.74  |      |   |   |
| RPneg_390.14502_11.316 | RP    | neg        | 11.316          | 390.1450   |            |      | 4        |         | 0.12089                                 | 0.45664 | 0.49  | 0.27     | 0.32  | 0.01  | 1.66                  | 0.34  | 0.98451 | 0.99776 | -0.09 | -0.55                    | 0.55  | -0.27 | -0.32                      | 0.00  | 0.23  | 0.55630  | 0.80752 | -0.22   | -0.38   | -0.15 | 0.23  | -0.15                 | 1.20  | 0.26219 | 0.77484 | -0.22   | -0.50  | -0.10 | 0.65  | -0.53 | -0.29 | -0.39 |      |   |   |
| RPpos_390.1844_10.86   | RP    | pos        | 10.86           | 390.1844   |            |      | 4        |         | 0.55630                                 | 0.80752 | -0.22 | -0.38    | -0.15 | 0.23  | -0.15                 | 1.20  | 0.26219 | 0.77484 | -0.22 | -0.50                    | -0.10 | 0.65  | -0.53                      | -0.29 | -0.39 | 0.80507  | 0.92503 | 0.02    | 0.17    | -0.11 | 1.06  | -0.05                 | -0.29 | 0.39835 | 0.85716 | -0.17   | -0.33  | -0.08 | 0.26  | -0.21 | 0.00  | -0.31 |      |   |   |
| HILICpos_390.2132_0.38 | HILIC | pos        | 0.38            | 390.2132   |            |      | 4        |         | 0.43214                                 | 0.73143 | -0.27 | -0.11    | 0.57  | -0.02 | 0.54                  | 0.37  | 0.91853 | 0.98860 | -0.15 | -0.50                    | -0.10 | 0.06  | -0.25                      | -0.32 | -0.42 | 0.8507   | 0.92503 | 0.02    | 0.17    | -0.11 | 1.06  | -0.05                 | -0.29 | 0.39835 | 0.85716 | -0.17   | -0.33  | -0.08 | 0.26  | -0.21 | 0.00  | -0.31 |      |   |   |
| RPpos_390.2138_10.64   | RP    | pos        | 10.64           | 390.2138   |            |      | 4        |         | 0.43214                                 | 0.73143 | -0.27 | -0.11    | 0.57  | -0.02 | 0.54                  | 0.37  | 0.91853 | 0.98860 | -0.15 | -0.50                    | -0.10 | 0.06  | -0.25                      | -0.32 | -0.42 | 0.8507   | 0.92503 | 0.02    | 0.17    | -0.11 | 1.06  | -0.05                 | -0.29 | 0.39835 | 0.85716 | -0.17   | -0.33  | -0.08 | 0.26  | -0.21 | 0.00  | -0.31 |      |   |   |
| RPpos_390.2232_6.71    | RP    | pos        | 6.71            | 390.2232   |            |      | 4        |         | 0.53198                                 | 0.79445 | -0.13 | -0.10    | -0.21 | -0.13 | 0.14                  | 0.03  | 0.36009 | 0.83504 | -0.15 | -0.13                    | -0.12 | -0.15 | 0.06                       | -0.28 | -0.27 | 0.25089  | 0.59002 | -0.47   | -0.26   | 0.05  | 0.32  | -0.76                 | -0.10 | 0.41035 | 0.86336 | -0.44   | 0.32   | -0.28 | -0.43 | -0.56 | 0.34  | -0.68 |      |   |   |
| RPneg_390.23904_5.805  | RP    | neg        | 5.805           | 390.2390   |            |      | 4        |         | 0.25089                                 | 0.59002 | -0.47 | -0.26    | 0.05  | 0.32  | -0.76                 | -0.10 | 0.41035 | 0.86336 | -0.44 | 0.32                     | -0.28 | -0.43 | -0.56                      | 0.34  | -0.68 | 0.93907  | 0.97781 | -0.12   | 0.19    | 0.43  | 0.33  | -0.26                 | 0.02  | 0.97663 | 0.99715 | -0.01   | 0.30   | -0.01 | -0.31 | -0.03 | 0.04  | -0.01 |      |   |   |
| HILICpos_390.2481_3.7  | HILIC | pos        | 3.7             | 390.2481   |            |      | 4        |         | 0.93907                                 | 0.97781 | -0.12 | 0.19     | 0.43  | 0.33  | -0.26                 | 0.02  | 0.97663 | 0.99715 | -0.01 | 0.30                     | -0.01 | -0.31 | -0.03                      | 0.04  | -0.01 | 0.71155  | 0.88230 | 0.16    | 0.56    | 0.63  | 0.05  | 0.35                  | 0.03  | 0.40427 | 0.85955 | -0.47   | -0.28  | 0.23  | -0.61 | -0.12 | -0.66 | 0.29  |      |   |   |
| HILICpos_390.2842_0.37 | HILIC | pos        | 0.37            | 390.2842   |            |      | 4        |         | 0.71155                                 | 0.88230 | 0.16  | 0.56     | 0.63  | 0.05  | 0.35                  | 0.03  | 0.40427 | 0.85955 | -0.47 | -0.28                    | 0.23  | -0.61 | -0.12                      | -0.66 | 0.29  | 0.54027  | 0.79830 | 0.22    | 0.58    | 0.64  | 0.08  | 0.45                  | -0.03 | 0.29946 | 0.80175 | -0.50   | -0.30  | 0.13  | -0.52 | -0.18 | -0.79 | 0.09  |      |   |   |
| RPpos_390.2849_10.16   | RP    | pos        | 10.16           | 390.2849   |            |      | 4        |         | 0.54027                                 | 0.79830 | 0.22  | 0.58     | 0.64  | 0.08  | 0.45                  | -0    |         |         |       |                          |       |       |                            |       |       |          |         |         |         |       |       |                       |       |         |         |         |        |       |       |       |       |       |      |   |   |

| Feature_ID             | Mode  | Ionization | Average_Rt.min. | Average_Mz | Metabolite | MSMS        | ID_Level | HMDB_ID | IV-Alcohol self-administration (IV-ASA) |         |       |            |       |                       |       |          |         |         | IV-Alcohol clamp (IV-AC) |       |         |       |          |                            |       |         |   |            |                       |         |   |          |   |        |            |   |         |   |        |   |
|------------------------|-------|------------|-----------------|------------|------------|-------------|----------|---------|-----------------------------------------|---------|-------|------------|-------|-----------------------|-------|----------|---------|---------|--------------------------|-------|---------|-------|----------|----------------------------|-------|---------|---|------------|-----------------------|---------|---|----------|---|--------|------------|---|---------|---|--------|---|
|                        |       |            |                 |            |            |             |          |         | Area Under the Curve (AUC)              |         |       |            |       | IV-Ghrelin or Placebo |       |          |         |         | BrAC=0                   |       |         |       |          | Area Under the Curve (AUC) |       |         |   |            | IV-Ghrelin or Placebo |         |   |          |   | BrAC=0 |            |   |         |   |        |   |
|                        |       |            |                 |            |            |             |          |         | Baseline                                |         |       | IV-Ghrelin |       | Placebo               |       | Baseline |         |         | IV-Ghrelin               |       | Placebo |       | Baseline |                            |       | Post-LD |   | IV-Ghrelin |                       | Placebo |   | Baseline |   |        | IV-Ghrelin |   | Placebo |   | BrAC=0 |   |
|                        |       |            |                 |            |            |             |          |         | p                                       | q       | d     | d          | d     | d                     | d     | d        | d       | d       | d                        | d     | d       | d     | d        | d                          | d     | d       | d | d          | d                     | d       | d | d        | d | d      | d          | d | d       | d | d      | d |
| RPpos_392.7495_7.4     | RP    | pos        | 7.4             | 392.7495   |            |             | 4        |         | 0.6612                                  | 0.85799 | -0.12 | -0.24      | 0.60  | -0.01                 | -0.32 | 0.60     | 0.95687 | 0.99462 | -0.03                    | 0.07  | 0.16    | 0.09  | -0.02    | -0.72                      | -0.10 |         |   |            |                       |         |   |          |   |        |            |   |         |   |        |   |
| HILICneg_393.0204_2.57 | HILIC | neg        | 2.57            | 393.0204   |            |             | 4        |         | 0.02150                                 | 0.26365 | -0.73 | -0.44      | -0.53 | -0.61                 | -0.45 | 0.17     | 0.82076 | 0.97286 | -0.18                    | -0.05 | 0.30    | -0.53 | -0.77    | -0.09                      | 0.34  |         |   |            |                       |         |   |          |   |        |            |   |         |   |        |   |
| HILICpos_393.0491_3.13 | HILIC | pos        | 3.13            | 393.0491   |            |             | 4        |         | 0.23744                                 | 0.57891 | -0.49 | -0.13      | -0.16 | -0.10                 | 0.07  | -0.47    | 0.63135 | 0.93546 | -0.02                    | -0.04 | 0.43    | -0.15 | -0.13    | -0.15                      | 0.01  |         |   |            |                       |         |   |          |   |        |            |   |         |   |        |   |
| RPneg_393.0658_3.574   | RP    | neg        | 3.574           | 393.0606   |            |             | 4        |         | 0.00365                                 | 0.12342 | 0.52  | 0.31       | 0.66  | 0.56                  | 0.56  | 0.70     | 0.79938 | 0.96931 | 0.11                     | 0.00  | -0.19   | 0.05  | 0.20     | 0.44                       | 0.62  |         |   |            |                       |         |   |          |   |        |            |   |         |   |        |   |
| HILICpos_393.0784_5.33 | HILIC | pos        | 5.33            | 393.0784   |            |             | 4        |         | 0.22170                                 | 0.56411 | 0.36  | 0.51       | 0.48  | 0.21                  | 0.52  | 0.30     | 0.13211 | 0.62747 | -0.24                    | -0.07 | 0.33    | 0.50  | 0.31     | 0.51                       | -0.76 |         |   |            |                       |         |   |          |   |        |            |   |         |   |        |   |
| HILICneg_393.1035_0.96 | HILIC | neg        | 0.96            | 393.1035   |            |             | 4        |         | 0.36133                                 | 0.59862 | -0.10 | 0.34       | 0.49  | 0.30                  | 0.44  | 0.17     | 0.90249 | 0.85882 | 0.41                     | 0.00  | -0.07   | 0.58  | 0.17     | 0.01                       | -0.28 |         |   |            |                       |         |   |          |   |        |            |   |         |   |        |   |
| HILICneg_393.104_0.88  | HILIC | neg        | 0.88            | 393.1040   |            |             | 4        |         | 0.59576                                 | 0.82675 | 0.10  | 0.54       | 1.02  | 0.33                  | 0.22  | -0.12    | 0.43661 | 0.87671 | 0.16                     | 0.14  | 0.14    | 0.17  | 0.47     | 0.16                       | -0.39 |         |   |            |                       |         |   |          |   |        |            |   |         |   |        |   |
| RPneg_393.13782_10.662 | RP    | neg        | 10.662          | 393.1378   |            |             | 4        |         | 0.00032                                 | 0.03385 | 1.70  | -0.11      | 0.42  | 0.81                  | 3.77  | 0.12     | 0.97383 | 0.99690 | -0.04                    | 0.08  | 0.33    | -0.16 | -0.15    | -0.03                      | -0.10 |         |   |            |                       |         |   |          |   |        |            |   |         |   |        |   |
| HILICneg_393.1555_0.8  | HILIC | neg        | 0.8             | 393.1555   |            |             | 4        |         | 0.64637                                 | 0.85063 | 0.04  | 0.04       | 0.35  | 0.01                  | 0.00  | 0.02     | 0.28346 | 0.79202 | -0.10                    | -0.07 | -0.09   | -0.04 | -0.10    | -0.20                      | -0.03 |         |   |            |                       |         |   |          |   |        |            |   |         |   |        |   |
| RPpos_393.209_4.26     | RP    | pos        | 4.26            | 393.2090   |            |             | 4        |         | 0.34514                                 | 0.66640 | -0.25 | -0.10      | 0.64  | -0.12                 | -0.14 | 0.12     | 0.26599 | 0.77820 | -0.37                    | -0.43 | -0.03   | -0.51 | 0.14     | -0.17                      | -0.57 |         |   |            |                       |         |   |          |   |        |            |   |         |   |        |   |
| RPneg_393.2139_10.919  | RP    | neg        | 10.919          | 393.2139   |            |             | 4        |         | 0.00677                                 | 0.16258 | 0.94  | -0.08      | 0.57  | 0.99                  | 2.00  | -0.01    | 0.80223 | 0.96982 | -0.12                    | -0.39 | 0.16    | -0.18 | -0.05    | -0.36                      | 0.08  |         |   |            |                       |         |   |          |   |        |            |   |         |   |        |   |
| HILICneg_393.2214_6.98 | HILIC | neg        | 6.98            | 393.2214   |            |             | 4        |         | 0.77141                                 | 0.91017 | 0.04  | 0.14       | 0.41  | 0.31                  | -0.05 | -0.53    | 0.06073 | 0.48151 | 0.17                     | 0.34  | 0.31    | 0.49  | 0.01     | -0.24                      | -0.20 |         |   |            |                       |         |   |          |   |        |            |   |         |   |        |   |
| RPpos_393.2239_10.16   | RP    | pos        | 10.16           | 393.2239   |            |             | 4        |         | 0.63065                                 | 0.84356 | 0.19  | 0.48       | 0.52  | 0.09                  | 0.46  | -0.08    | 0.25404 | 0.76928 | -0.57                    | -0.28 | 0.10    | -0.53 | -0.32    | -0.82                      | -0.17 |         |   |            |                       |         |   |          |   |        |            |   |         |   |        |   |
| RPpos_393.2399_10.61   | RP    | pos        | 10.61           | 393.2399   |            |             | 4        |         | 0.41695                                 | 0.72106 | 0.25  | 0.02       | 0.35  | 0.70                  | 0.63  | -0.30    | 0.30419 | 0.80438 | 0.12                     | 0.34  | -0.10   | 0.10  | -0.01    | 0.45                       | -0.05 |         |   |            |                       |         |   |          |   |        |            |   |         |   |        |   |
| RPpos_393.2464_6.14    | RP    | pos        | 6.14            | 393.2464   |            |             | 4        |         | 0.18338                                 | 0.52942 | -0.41 | 0.39       | 0.01  | 0.06                  | -0.29 | -0.13    | 0.82221 | 0.97319 | -0.06                    | -0.44 | 0.08    | 0.06  | -0.16    | 0.25                       | -0.16 |         |   |            |                       |         |   |          |   |        |            |   |         |   |        |   |
| RPpos_393.2558_7.43    | RP    | pos        | 7.43            | 393.2558   |            |             | 4        |         | 0.32861                                 | 0.65323 | -0.28 | -0.07      | 0.83  | -0.35                 | -0.40 | 0.45     | 0.23541 | 0.75306 | -0.36                    | -0.26 | -0.02   | -0.36 | -0.10    | -0.41                      | -0.44 |         |   |            |                       |         |   |          |   |        |            |   |         |   |        |   |
| RPpos_393.2592_12.83   | RP    | pos        | 12.83           | 393.2592   |            |             | 4        |         | 0.79940                                 | 0.92255 | 0.05  | 0.45       | 0.16  | -0.21                 | 0.30  | 0.48     | 0.10112 | 0.57331 | -0.37                    | -0.01 | 0.01    | -0.62 | -0.12    | -0.48                      | -0.78 |         |   |            |                       |         |   |          |   |        |            |   |         |   |        |   |
| RPneg_393.26398_8.7    | RP    | neg        | 8.7             | 393.2640   |            |             | 4        |         | 0.94684                                 | 0.85078 | -0.07 | -0.02      | 0.52  | 0.03                  | -0.32 | -0.39    | 0.64343 | 0.93738 | 0.10                     | -0.41 | -0.02   | -0.62 | 0.30     | 0.33                       | 0.10  | -0.26   |   |            |                       |         |   |          |   |        |            |   |         |   |        |   |
| HILICneg_393.6635_1.45 | HILIC | neg        | 1.45            | 393.6635   |            |             | 4        |         | 0.49029                                 | 0.77142 | -0.17 | 0.02       | -0.02 | -0.09                 | 0.00  | -0.39    | 0.00067 | 0.04426 | -0.54                    | -0.53 | -0.62   | -0.61 | -0.36    | -0.43                      | -0.36 |         |   |            |                       |         |   |          |   |        |            |   |         |   |        |   |
| RPpos_393.8923_1.047   | RP    | pos        | 1.047           | 393.8923   |            |             | 4        |         | 0.58511                                 | 0.94670 | 0.03  | -0.27      | 0.30  | 0.41                  | 0.41  | -0.14    | 0.06032 | 0.48101 | 0.46                     | 0.02  | 0.10    | 0.46  | 0.00     | 0.68                       | 1.02  |         |   |            |                       |         |   |          |   |        |            |   |         |   |        |   |
| RPneg_394.01004_2.811  | RP    | neg        | 2.811           | 394.0100   |            |             | 4        |         | 0.22808                                 | 0.56969 | -0.29 | 0.14       | 0.29  | -0.09                 | -0.54 | -0.43    | 0.42008 | 0.86806 | -0.32                    | -0.35 | -0.27   | 0.01  | -0.15    | -0.46                      | -0.66 |         |   |            |                       |         |   |          |   |        |            |   |         |   |        |   |
| RPneg_394.13214_7.404  | RP    | neg        | 7.404           | 394.1321   |            |             | 4        |         | 0.37402                                 | 0.68985 | -0.18 | -0.17      | -0.14 | -0.18                 | -0.16 | -0.08    | 0.00337 | 0.11757 | 0.53                     | 0.75  | 0.68    | 0.65  | 0.44     | 0.54                       | -0.02 |         |   |            |                       |         |   |          |   |        |            |   |         |   |        |   |
| HILICpos_394.1731_1.54 | HILIC | pos        | 1.54            | 394.1731   |            |             | 4        |         | 0.28141                                 | 0.61550 | 0.30  | -0.26      | 0.96  | 0.26                  | 0.38  | 1.13     | 0.97220 | 0.99673 | -0.01                    | -0.20 | 0.01    | 0.02  | 0.27     | 0.17                       | -0.20 |         |   |            |                       |         |   |          |   |        |            |   |         |   |        |   |
| RPneg_394.1806_10.914  | RP    | neg        | 10.914          | 394.1806   |            |             | 4        |         | 0.01169                                 | 0.20797 | 1.09  | -0.04      | 0.27  | 1.07                  | 2.28  | -0.27    | 0.41072 | 0.86351 | -0.19                    | -0.43 | -0.03   | -0.43 | 0.06     | -0.16                      | -0.05 |         |   |            |                       |         |   |          |   |        |            |   |         |   |        |   |
| RPneg_394.1879_9.914   | RP    | neg        | 9.914           | 394.1879   |            |             | 4        |         | 0.22469                                 | 0.56687 | -0.19 | 0.61       | 0.30  | -0.13                 | -0.27 | -0.64    | 0.30197 | 0.80326 | -0.17                    | -0.26 | -0.03   | 0.15  | -0.01    | -0.29                      | -0.46 |         |   |            |                       |         |   |          |   |        |            |   |         |   |        |   |
| HILICpos_394.2083_0.95 | HILIC | pos        | 0.95            | 394.2083   |            |             | 4        |         | 0.81576                                 | 0.92982 | -0.09 | 0.32       | 0.50  | 0.30                  | -0.28 | -0.45    | 0.90051 | 0.98553 | -0.03                    | -0.17 | 0.01    | 0.71  | -0.07    | -0.16                      | -0.59 |         |   |            |                       |         |   |          |   |        |            |   |         |   |        |   |
| HILICpos_394.2088_0.91 | HILIC | pos        | 0.91            | 394.2088   |            |             | 4        |         | 0.63403                                 | 0.84482 | 0.07  | 0.26       | 0.31  | 0.54                  | -0.02 | -1.05    | 0.91514 | 0.98770 | 0.04                     | -0.02 | 0.22    | 0.36  | 0.17     | -0.18                      | -0.57 |         |   |            |                       |         |   |          |   |        |            |   |         |   |        |   |
| RPpos_394.2092_9.9     | RP    | pos        | 9.9             | 394.2092   |            |             | 4        |         | 0.34379                                 | 0.66515 | 0.60  | 1.59       | 0.34  | 0.77                  | 0.36  | 0.79     | 0.20519 | 0.72160 | -0.25                    | -0.24 | -0.22   | -0.19 | -0.26    | -0.27                      | -0.32 |         |   |            |                       |         |   |          |   |        |            |   |         |   |        |   |
| RPpos_394.2166_11.3    | RP    | pos        | 11.3            | 394.2166   |            |             | 4        |         | 0.00140                                 | 0.07596 | 1.19  | -0.02      | 0.16  | 0.62                  | 2.75  | 0.38     | 0.83209 | 0.97501 | -0.03                    | -0.19 | 0.19    | -0.20 | 0.31     | -0.15                      | 0.03  |         |   |            |                       |         |   |          |   |        |            |   |         |   |        |   |
| RPpos_394.2225_7.07    | RP    | pos        | 7.07            | 394.2225   |            |             | 4        |         | 0.05165                                 | 0.34916 | -0.37 | -0.25      | 0.53  | -0.15                 | -0.60 | 0.08     | 0.79615 | 0.96829 | -0.19                    | -0.33 | -0.03   | -0.63 | 0.42     | -0.06                      | -0.01 |         |   |            |                       |         |   |          |   |        |            |   |         |   |        |   |
| RPpos_394.2541_5.86    | RP    | pos        | 5.86            | 394.2541   |            |             | 4        |         | 0.12631                                 | 0.46275 | 0.29  | 0.33       | 0.19  | 0.29                  | 0.45  | 1.35     | 0.21678 | 0.73229 | 0.09                     | 0.00  | 0.25    | 0.02  | 0.13     | 0.08                       | -0.12 |         |   |            |                       |         |   |          |   |        |            |   |         |   |        |   |
| RPpos_394.2616_11.58   | RP    | pos        | 11.58           | 394.2616   |            |             | 4        |         | 0.85744                                 | 0.8464  | -0.06 | 0.18       | 0.09  | -0.16                 | 0.04  | -0.83    | 0.72823 | 0.95678 | -0.02                    | 0.67  | -0.01   | -0.01 | -0.36    | 0.07                       | -0.04 |         |   |            |                       |         |   |          |   |        |            |   |         |   |        |   |
| RPpos_394.2954_6.48    | RP    | pos        | 6.48            | 394.2954   |            |             | 4        |         | 0.53114                                 | 0.79398 | 0.23  | 0.04       | 0.43  | 0.21                  | 0.25  | 0.49     | 0.98457 | 0.99776 | -0.01                    | -0.20 | 0.08    | -0.08 | -0.31    | 0.06                       | 1.02  |         |   |            |                       |         |   |          |   |        |            |   |         |   |        |   |
| RPpos_394.3308_10.8    | RP    | pos        | 10.8            | 394.3308   |            | no autoMSMS | 4        |         | 0.52894                                 | 0.79273 | 0.08  | -0.05      | 0.26  | 0.06                  | 0.36  | -0.24    | 0.00001 | 0.00292 | 1.02                     | -1.11 | 0.83    | 1.03  | 1.28     | 1.07                       | 0.54  |         |   |            |                       |         |   |          |   |        |            |   |         |   |        |   |
| RPneg_394.33188_11.056 | RP    | neg        | 11.056          | 394.3319   |            |             | 4        |         | 0.44239                                 | 0.73848 | 0     |            |       |                       |       |          |         |         |                          |       |         |       |          |                            |       |         |   |            |                       |         |   |          |   |        |            |   |         |   |        |   |



| Feature_ID             | Mode  | Ionization | Average_Rt.min. | Average_Mz | Metabolite | MSMS | ID_Level | HMDB_ID | IV-Alcohol self-administration (IV-ASA) |         |       |                       |       |       |       |       |         |         |       |       |       | IV-Alcohol clamp (IV-AC)   |       |       |          |       |   |         |   |   |                       |   |   |   |   |   |        |  |  |
|------------------------|-------|------------|-----------------|------------|------------|------|----------|---------|-----------------------------------------|---------|-------|-----------------------|-------|-------|-------|-------|---------|---------|-------|-------|-------|----------------------------|-------|-------|----------|-------|---|---------|---|---|-----------------------|---|---|---|---|---|--------|--|--|
|                        |       |            |                 |            |            |      |          |         | Area Under the Curve (AUC)              |         |       | IV-Ghrelin or Placebo |       |       |       |       |         | BrAC=0  |       |       |       | Area Under the Curve (AUC) |       |       | Baseline |       |   | Post-LD |   |   | IV-Ghrelin or Placebo |   |   |   |   |   | BrAC=0 |  |  |
|                        |       |            |                 |            |            |      |          |         | p                                       | q       | d     | d                     | d     | d     | d     | d     | p       | q       | d     | p     | q     | d                          | d     | d     | d        | p     | q | d       | d | d | d                     | d | d | d | d | d | d      |  |  |
|                        |       |            |                 |            |            |      |          |         |                                         |         |       |                       |       |       |       |       |         |         |       |       |       |                            |       |       |          |       |   |         |   |   |                       |   |   |   |   |   |        |  |  |
| RPpos_397.1474_6.48    | RP    | pos        | 6.48            | 397.1474   |            |      | 4        |         | 0.80361                                 | 0.92441 | 0.10  | 0.41                  | 1.05  | 0.03  | 0.75  | 0.27  | 0.90936 | 0.98698 | 0.07  | 1.35  | 0.11  | -0.33                      | 0.03  | 0.03  | -0.11    | -0.44 |   |         |   |   |                       |   |   |   |   |   |        |  |  |
| HILICpos_397.1592_0.64 | HILIC | pos        | 0.64            | 397.1592   |            |      | 4        |         | 0.06155                                 | 0.36878 | -0.57 | -0.21                 | 0.21  | -0.25 | -0.79 | -0.40 | 0.65160 | 0.94006 | 0.12  | 0.04  | 0.51  | -0.40                      | 0.56  | 0.16  | -0.11    | 0.11  |   |         |   |   |                       |   |   |   |   |   |        |  |  |
| RPneg_397.16879_11.193 | RP    | neg        | 11.193          | 397.1688   |            |      | 4        |         | 0.00014                                 | 0.02223 | 2.03  | -0.06                 | 0.57  | 1.88  | 3.42  | -0.14 | 0.96970 | 0.99673 | -0.01 | -0.14 | 0.37  | -0.15                      | 0.00  | -0.10 | -0.06    | -0.06 |   |         |   |   |                       |   |   |   |   |   |        |  |  |
| RPneg_397.17801_6.401  | RP    | neg        | 6.401           | 397.1780   |            |      | 4        |         | 0.19417                                 | 0.53956 | -0.05 | -0.14                 | -0.23 | -0.04 | 0.58  | -0.17 | 0.78904 | 0.96713 | 0.39  | 0.74  | 0.36  | -0.35                      | 0.54  | 0.76  | 0.02     | 0.02  |   |         |   |   |                       |   |   |   |   |   |        |  |  |
| RPneg_397.1822_5.8     | HILIC | pos        | 5.8             | 397.1822   |            |      | 4        |         | 0.91680                                 | 0.96975 | -0.09 | 0.43                  | 0.56  | 0.35  | 0.21  | -0.25 | 1.13965 | 0.96697 | 1.12  | 0.82  | 0.53  | 1.53                       | 0.17  | 1.04  | -0.06    | -0.06 |   |         |   |   |                       |   |   |   |   |   |        |  |  |
| RPneg_397.1858_8.137   | RP    | neg        | 8.437           | 397.1858   | no MSMS    |      | 4        |         | 0.00002                                 | 0.00743 | 0.64  | 0.04                  | 0.30  | 0.77  | 1.31  | 0.21  | 0.00000 | 0.00003 | 0.70  | 0.03  | 0.48  | 0.03                       | 0.32  | -1.14 | -0.14    | -0.14 |   |         |   |   |                       |   |   |   |   |   |        |  |  |
| RPneg_397.20419_8.094  | RP    | neg        | 8.094           | 397.2042   |            |      | 4        |         | 0.02631                                 | 0.28143 | 0.29  | 0.08                  | 0.33  | 0.38  | 0.60  | 0.36  | 0.01240 | 0.23841 | 0.11  | -0.13 | -0.06 | 0.07                       | 0.30  | 0.31  | -0.04    | -0.04 |   |         |   |   |                       |   |   |   |   |   |        |  |  |
| RPneg_397.20435_11.785 | RP    | neg        | 11.785          | 397.2044   |            |      | 4        |         | 0.32732                                 | 0.65211 | -0.19 | -0.04                 | -0.04 | 0.26  | -0.26 | 0.50  | 0.68660 | 0.94909 | -0.10 | 0.03  | -0.43 | -0.34                      | 0.63  | 0.05  | 0.59     | 0.59  |   |         |   |   |                       |   |   |   |   |   |        |  |  |
| RPneg_397.20456_8.685  | RP    | neg        | 8.685           | 397.2046   |            |      | 4        |         | 0.08666                                 | 0.41277 | 0.03  | -0.07                 | 0.40  | 0.39  | 0.07  | -0.05 | 0.07770 | 0.52500 | 0.50  | 0.45  | 0.44  | 0.57                       | 0.67  | 0.73  | 0.02     | 0.02  |   |         |   |   |                       |   |   |   |   |   |        |  |  |
| RPneg_397.20462_9.006  | RP    | neg        | 9.006           | 397.2046   |            |      | 4        |         | 0.38869                                 | 0.70066 | -0.01 | -0.16                 | 0.25  | 0.28  | 0.04  | -0.09 | 0.54536 | 0.91584 | 0.23  | -0.09 | 0.22  | 0.24                       | 0.88  | 0.88  | -0.37    | -0.37 |   |         |   |   |                       |   |   |   |   |   |        |  |  |
| RPneg_397.20471_8.931  | RP    | neg        | 8.931           | 397.2047   |            |      | 4        |         | 0.61505                                 | 0.83589 | -0.17 | -0.18                 | -0.11 | -0.20 | -0.08 | -0.08 | 0.47906 | 0.89404 | 0.14  | 0.17  | 0.15  | 0.32                       | 0.42  | 0.34  | -0.49    | -0.49 |   |         |   |   |                       |   |   |   |   |   |        |  |  |
| RPneg_397.20493_7.676  | RP    | neg        | 7.676           | 397.2049   |            |      | 4        |         | 0.01593                                 | 0.23382 | -0.20 | 0.01                  | -0.02 | -0.25 | 0.01  | -0.09 | 0.88751 | 0.98356 | -0.04 | -0.01 | 0.11  | -0.13                      | -0.07 | -0.10 | 0.01     | 0.01  |   |         |   |   |                       |   |   |   |   |   |        |  |  |
| HILICneg_397.2053_0.55 | HILIC | neg        | 0.55            | 397.2053   |            |      | 4        |         | 0.02699                                 | 0.28288 | 0.30  | 0.09                  | 0.32  | 0.44  | 0.62  | 0.37  | 0.04007 | 0.40790 | 0.08  | -0.17 | -0.08 | 0.05                       | 0.27  | 0.25  | -0.01    | -0.01 |   |         |   |   |                       |   |   |   |   |   |        |  |  |
| RPneg_397.22256_9.331  | RP    | neg        | 9.331           | 397.2226   |            |      | 4        |         | 0.31217                                 | 0.64016 | -0.08 | 0.15                  | 0.31  | 0.02  | 0.05  | -0.31 | 0.01940 | 0.29417 | 0.79  | 1.03  | 1.03  | 1.05                       | 1.00  | 0.76  | 0.70     | 0.70  |   |         |   |   |                       |   |   |   |   |   |        |  |  |
| RPneg_397.22305_9.252  | RP    | neg        | 9.252           | 397.2231   |            |      | 4        |         | 0.63270                                 | 0.84427 | 0.00  | 0.28                  | 0.27  | 0.06  | 0.18  | -0.04 | 0.24618 | 0.76221 | 0.39  | 0.31  | 0.45  | 0.48                       | 0.48  | 0.30  | 0.51     | 0.51  |   |         |   |   |                       |   |   |   |   |   |        |  |  |
| HILICneg_397.2238_1.42 | HILIC | neg        | 1.42            | 397.2238   |            |      | 4        |         | 0.33618                                 | 0.65911 | -0.06 | 0.09                  | 0.18  | 0.10  | 0.08  | -0.30 | 0.02399 | 0.32676 | 0.82  | 0.81  | 1.02  | 1.18                       | 0.91  | 0.87  | 0.59     | 0.59  |   |         |   |   |                       |   |   |   |   |   |        |  |  |
| RPneg_397.23633_11.071 | RP    | neg        | 11.071          | 397.2363   |            |      | 4        |         | 0.00724                                 | 0.16773 | 0.69  | 0.06                  | 0.18  | 0.34  | 2.15  | 0.09  | 0.34525 | 0.82842 | 0.58  | 0.39  | 0.99  | 0.32                       | 0.52  | 0.13  | 0.04     | 0.04  |   |         |   |   |                       |   |   |   |   |   |        |  |  |
| RPpos_397.3107_9.93    | RP    | pos        | 9.93            | 397.3107   |            |      | 4        |         | 0.97033                                 | 0.98871 | 0.04  | 0.21                  | 0.28  | -0.01 | 0.13  | 0.41  | 0.38456 | 0.84935 | 0.03  | 0.09  | 0.10  | -0.05                      | 0.16  | -0.04 | 0.01     | 0.01  |   |         |   |   |                       |   |   |   |   |   |        |  |  |
| RPpos_397.3307_9.96    | RP    | pos        | 9.96            | 397.3307   |            |      | 4        |         | 0.99988                                 | 0.99980 | -0.04 | -0.03                 | -0.20 | 0.42  | 0.45  | 1.06  | 0.55445 | 0.91858 | 0.17  | 0.13  | -0.57 | 0.03                       | 0.32  | 0.70  | 0.11     | 0.11  |   |         |   |   |                       |   |   |   |   |   |        |  |  |
| RPneg_397.33099_10.327 | RP    | neg        | 10.327          | 397.3310   |            |      | 4        |         | 0.35965                                 | 0.67828 | -0.13 | 0.76                  | 0.23  | -0.05 | 0.60  | -0.57 | 0.02675 | 0.34431 | 0.81  | -0.25 | 1.02  | 0.26                       | 0.04  | 0.34  | 0.90     | 0.90  |   |         |   |   |                       |   |   |   |   |   |        |  |  |
| RPneg_397.33218_11.577 | RP    | neg        | 11.577          | 397.3322   |            |      | 4        |         | 0.01202                                 | 0.20984 | 0.40  | 0.36                  | 0.20  | 0.78  | 0.83  | 0.15  | 0.05004 | 0.44558 | 0.22  | -0.09 | 0.10  | 0.44                       | 0.35  | 0.22  | -0.07    | -0.07 |   |         |   |   |                       |   |   |   |   |   |        |  |  |
| RPneg_397.36786_11.361 | RP    | neg        | 11.361          | 397.3679   |            |      | 4        |         | 0.49619                                 | 0.77397 | 0.11  | 0.03                  | -0.16 | 0.20  | 0.39  | 0.07  | 0.67821 | 0.94718 | -0.13 | -0.29 | -0.18 | 0.42                       | -0.37 | -0.13 | -0.42    | -0.42 |   |         |   |   |                       |   |   |   |   |   |        |  |  |
| RPpos_397.4145_11.58   | RP    | pos        | 11.58           | 397.4145   |            |      | 4        |         | 0.67258                                 | 0.86373 | -0.12 | 0.14                  | 0.11  | 0.01  | 0.09  | -0.87 | 0.95295 | 0.99385 | 0.05  | 0.61  | -0.06 | -0.16                      | -0.39 | 0.14  | 0.04     | 0.04  |   |         |   |   |                       |   |   |   |   |   |        |  |  |
| RPpos_397.7492_7.49    | RP    | pos        | 7.49            | 397.7492   |            |      | 4        |         | 0.57896                                 | 0.81776 | -0.20 | -0.01                 | 1.06  | -0.32 | -0.26 | 0.65  | 0.30654 | 0.80651 | -0.32 | -0.25 | -0.09 | -0.28                      | -0.10 | -0.35 | -0.39    | -0.39 |   |         |   |   |                       |   |   |   |   |   |        |  |  |
| RPpos_397.7541_12.58   | RP    | pos        | 12.58           | 397.7541   |            |      | 4        |         | 0.81849                                 | 0.93082 | -0.03 | 0.20                  | 0.14  | -0.10 | 0.36  | 0.09  | 0.91262 | 0.98738 | -0.05 | -0.22 | -0.23 | -0.10                      | 0.18  | 0.05  | -0.12    | -0.12 |   |         |   |   |                       |   |   |   |   |   |        |  |  |
| HILICpos_398.0334_5.32 | HILIC | pos        | 5.32            | 398.0334   |            |      | 4        |         | 0.50607                                 | 0.77973 | 0.18  | 0.32                  | 0.39  | 0.15  | 0.41  | 0.56  | 0.18267 | 0.69844 | 0.03  | -0.16 | 0.03  | 0.01                       | 0.12  | 0.27  | -0.64    | -0.64 |   |         |   |   |                       |   |   |   |   |   |        |  |  |
| RPneg_398.06638_8.767  | RP    | neg        | 8.767           | 398.0664   |            |      | 4        |         | 0.63249                                 | 0.84427 | -0.08 | -0.12                 | -0.02 | -0.16 | 0.24  | 0.14  | 0.10706 | 0.58514 | 0.20  | 0.20  | 0.27  | 0.14                       | 0.14  | 0.10  | 0.33     | 0.33  |   |         |   |   |                       |   |   |   |   |   |        |  |  |
| HILICneg_398.1046_4.2  | HILIC | neg        | 4.2             | 398.1046   |            |      | 4        |         | 0.11433                                 | 0.45005 | -0.33 | 0.30                  | 0.23  | -0.22 | -0.46 | -0.48 | 0.62744 | 0.93463 | -0.31 | -1.08 | 0.04  | -0.55                      | 0.41  | -0.78 | -0.10    | -0.10 |   |         |   |   |                       |   |   |   |   |   |        |  |  |
| RPneg_398.11215_10.665 | RP    | neg        | 10.665          | 398.1122   |            |      | 4        |         | 0.00015                                 | 0.02351 | 1.47  | -0.12                 | 0.71  | 0.98  | 2.56  | 0.51  | 0.84700 | 0.97724 | -0.09 | 0.00  | 0.31  | -0.25                      | -0.11 | -0.20 | -0.10    | -0.10 |   |         |   |   |                       |   |   |   |   |   |        |  |  |
| HILICneg_398.1234_0.92 | HILIC | neg        | 0.92            | 398.1234   |            |      | 4        |         | 0.00328                                 | 0.11843 | -0.39 | -0.03                 | -0.31 | -0.56 | -0.09 | -0.01 | 0.05789 | 0.47329 | -0.37 | -0.41 | -0.16 | -0.48                      | -0.28 | -0.17 | -0.46    | -0.46 |   |         |   |   |                       |   |   |   |   |   |        |  |  |
| RPneg_398.13162_10.92  | RP    | neg        | 10.92           | 398.1316   |            |      | 4        |         | 0.00193                                 | 0.08849 | 1.17  | -0.14                 | 0.69  | 1.15  | 2.04  | 0.07  | 0.71102 | 0.96458 | -0.15 | -0.24 | 0.25  | -0.24                      | -0.24 | -0.22 | -0.07    | -0.07 |   |         |   |   |                       |   |   |   |   |   |        |  |  |
| RPneg_398.13922_10.761 | RP    | neg        | 10.761          | 398.1392   |            |      | 4        |         | 0.00592                                 | 0.15063 | 1.30  | -0.04                 | 0.24  | 0.92  | 3.44  | -0.41 | 0.82366 | 0.97343 | 0.05  | -0.11 | 0.78  | -0.21                      | 0.08  | -0.29 | -0.10    | -0.10 |   |         |   |   |                       |   |   |   |   |   |        |  |  |
| RPneg_398.17645_11.311 | RP    | neg        | 11.311          | 398.1765   |            |      | 4        |         | 0.19798                                 | 0.54249 | -0.33 | -0.01                 | -0.04 | 0.76  | -0.33 | 0.31  | 0.56524 | 0.93073 | 0.11  | 0.12  | 0.27  | -0.56                      | 0.00  | 0.21  | 0.69     | 0.69  |   |         |   |   |                       |   |   |   |   |   |        |  |  |
| RPneg_398.18039_5.177  | RP    | neg        | 5.177           | 398.1804   |            |      | 4        |         | 0.50452                                 | 0.77906 | -0.13 | 0.20                  | -0.16 | 0.06  | -0.12 | -0.25 | 0.42378 | 0.87033 | 0.12  | 0.26  | 0.25  | 0.03                       | 0.06  | 0.04  | -0.07    | -0.07 |   |         |   |   |                       |   |   |   |   |   |        |  |  |
| RPneg_398.21222_11.545 | RP    | neg        | 11.545          | 398.2122   |            |      | 4        |         | 0.03946                                 | 0.31957 | -0.47 | -0.25                 | -0.45 | -0.10 | -0.18 | 0.38  | 0.77288 | 0.96458 | 0.08  | 0.17  | -0.37 | -0.16                      | -0.03 | 0.34  | 0.79     | 0.79  |   |         |   |   |                       |   |   |   |   |   |        |  |  |
| RPpos_398.231_11.18    | RP    | pos        | 11.18           | 398.2310   |            |      | 4        |         | 0.01374                                 | 0.22294 | 0.99  | -0.09                 | 0.36  | 1.24  | 2.11  | -0.32 | 0.84767 | 0.97724 | -0.08 | 0.00  | 0.14  | -0.24                      | -0.23 | -0.08 | 0.01     | 0.01  |   |         |   |   |                       |   |   |   |   |   |        |  |  |
| RPneg_398.26547_9.721  | RP    | neg        | 9.721           | 398.2655   |            |      | 4        |         | 0.20542                                 | 0.54934 | -0.20 | -0.01                 | 0.01  | -0.12 | -0.08 | -0.14 | 0.37042 | 0.84063 | 0.03  | -0.03 | 0.17  | 0.00                       | -0.09 | 0.10  | 0.16     | 0.16  |   |         |   |   |                       |   |   |   |   |   |        |  |  |
| RPpos_398.2743_6.98    | RP    | pos        | 6.98            | 398.2743   |            |      | 4        |         | 0.66962                                 | 0.86212 | -0.03 | 0.18                  | 0.35  | -0.24 | 0.44  | 0.41  | 0.50383 | 0.90315 | -0.32 | -0.05 | 0.34  | -0.01                      | 0.17  | -0.52 | 0.48     | 0.48  |   |         |   |   |                       |   |   |   |   |   |        |  |  |
| HILICpos_398.2755_0.41 | HILIC | pos        | 0.41            | 398.2755   |            |      | 4        |         | 0.91943                                 | 0.97060 | 0.03  | 0.34                  | 0.43  | 0.08  | 0.19  | 0.10  | 0.70976 | 0.95278 | -0.18 | -0.02 | 0.21  | -0.37                      | -0.03 | -0.46 | 0.61     | 0.61  |   |         |   |   |                       |   |   |   |   |   |        |  |  |
| HILICpos_398.3257_0.62 | HILIC | pos        | 0.62            | 398.3257   |            |      | 4        |         | 0.54100                                 | 0.79848 | 0.21  | -0.02                 | -0.02 | 0.44  | 0.97  | 0.16  | 0.08171 | 0.53425 | 0.36  | 0.37  | 0.23  | 0.35                       | 0.03  | 0.92  | 0.30     | 0.30  |   |         |   |   |                       |   |   |   |   |   |        |  |  |
| RPpos_398.3265_8.98    | RP    | pos        | 8.98            | 398.3265   |            |      | 4        |         | 0.32931                                 | 0.65349 | 0.28  | 0.22                  | 0.25  | 0.23  | 1.46  | 0.11  | 0.05137 | 0.45163 | 0.35  | 0.18  | 0.33  | 0.40                       | 0.38  | 0.53  | 0.10     | 0.10  |   |         |   |   |                       |   |   |   |   |   |        |  |  |
| RPneg_398.3273_10.383  | RP    | neg        | 10.383          | 398.3273   |            |      | 4        |         | 0.72240                                 | 0.88666 | 0.17  | 0.55                  | -0.02 | 0.53  | -0.07 | -0.83 | 0.21866 | 0.73520 | -0.26 | 0.18  | -0.15 | 0.01                       | -0.55 | -0.04 | -0.26    | -0.26 |   |         |   |   |                       |   |   |   |   |   |        |  |  |
| HILICpos_398.341_0.53  | HILIC | pos        | 0.53            | 398.3410   |            |      | 4        |         | 0.25556                                 | 0.59197 | 0.16  | 0.09                  | 0.21  | 1.00  | 0.23  | -0.06 | 0.20790 | 0.72383 | -0.25 | -0.30 | -0.25 | -0.29                      | -0.15 | -0.25 | -0.24    | -0.24 |   |         |   |   |                       |   |   |   |   |   |        |  |  |
| RPpos_398.3424_6.69    | RP    | pos        | 6.69            | 398.3424   |            |      | 4        |         | 0.32731                                 | 0.65211 | 0.14  | 0.05                  | 0.26  | 1.18  | 0.11  | -0.13 |         |         |       |       |       |                            |       |       |          |       |   |         |   |   |                       |   |   |   |   |   |        |  |  |

| Feature_ID             | Mode  | Ionization | Average_Rt.min. | Average_Mz | Metabolite | MSMS | ID_Level | HMDB_ID | IV-Alcohol self-administration (IV-ASA) |         |        |       |        |       |                       |       |         |         |       |       | IV-Alcohol clamp (IV-AC)   |       |        |       |          |       |                       |   |        |   |   |   |
|------------------------|-------|------------|-----------------|------------|------------|------|----------|---------|-----------------------------------------|---------|--------|-------|--------|-------|-----------------------|-------|---------|---------|-------|-------|----------------------------|-------|--------|-------|----------|-------|-----------------------|---|--------|---|---|---|
|                        |       |            |                 |            |            |      |          |         | Area Under the Curve (AUC)              |         |        |       |        |       | IV-Ghrelin or Placebo |       |         |         |       |       | Area Under the Curve (AUC) |       |        |       |          |       | IV-Ghrelin or Placebo |   |        |   |   |   |
|                        |       |            |                 |            |            |      |          |         | Baseline                                |         | IV-ASA |       | BxAc=0 |       | Baseline              |       | Post-LD |         | IV-AC |       | Post-AC                    |       | BxAc=0 |       | Baseline |       | IV-ASA                |   | BxAc=0 |   |   |   |
|                        |       |            |                 |            |            |      |          |         | p                                       | q       | d      | d     | d      | d     | d                     | d     | d       | d       | p     | q     | d                          | d     | d      | d     | p        | q     | d                     | d | d      | d | p | q |
| RPneg_400.12817_10.92  | RP    | neg        | 10.92           |            |            |      | 4        |         | 0.00036                                 | 0.03488 | 1.41   | -0.14 | 0.91   | 1.26  | 2.36                  | 0.21  | 0.71070 | 0.95280 | -0.18 | -0.17 | 0.29                       | -0.29 | -0.33  | -0.31 | -0.31    | -0.06 |                       |   |        |   |   |   |
| RPneg_400.14368_5.894  | RP    | neg        | 5.894           | 400.1437   |            |      | 4        |         | 0.31743                                 | 0.64643 | 0.42   | 0.43  | 0.69   | 0.54  | 0.20                  | 0.10  | 0.12096 | 0.60864 | 2.41  | 1.73  | 2.18                       | 2.06  | 2.82   | 1.75  | 1.32     |       |                       |   |        |   |   |   |
| RPneg_400.14758_11.192 | RP    | neg        | 11.192          | 400.1476   |            |      | 4        |         | 0.00058                                 | 0.04619 | 1.49   | -0.03 | 0.53   | 1.58  | 2.53                  | -0.23 | 0.82220 | 0.97319 | -0.09 | -0.17 | 0.24                       | 2.24  | -0.03  | -0.19 | -0.04    |       |                       |   |        |   |   |   |
| RPneg_400.15509_14.17  | RP    | neg        | 14.17           | 400.1551   |            |      | 4        |         | 0.87759                                 | 0.95410 | -0.08  | 0.73  | 0.23   | -0.31 | 0.19                  | 0.78  | 0.01894 | 0.29210 | -0.40 | 0.33  | -0.03                      | -0.48 | -0.34  | 0.13  | -0.84    |       |                       |   |        |   |   |   |
| RPneg_400.15515_11.604 | RP    | neg        | 11.604          | 400.1552   |            |      | 4        |         | 0.59406                                 | 0.61511 | -0.14  | 0.17  | 0.12   | 0.12  | 0.05                  | -0.92 | 0.78977 | 0.95656 | -0.01 | 0.77  | -0.04                      | 0.04  | -0.04  | -0.04 | 0.01     |       |                       |   |        |   |   |   |
| RPneg_400.15521_11.143 | RP    | neg        | 11.143          | 400.1552   |            |      | 4        |         | 0.77183                                 | 0.91029 | 0.09   | 0.33  | -0.01  | 0.12  | 0.09                  | 0.25  | 0.65235 | 0.84944 | 0.11  | 1.22  | 0.45                       | 0.21  | -0.05  | 0.53  | 0.57     |       |                       |   |        |   |   |   |
| RPneg_400.15585_12.936 | RP    | neg        | 12.936          | 400.1559   |            |      | 4        |         | 0.26754                                 | 0.60371 | -0.23  | -0.03 | -0.25  | -0.25 | 0.41                  | 0.01  | 0.07649 | 0.52148 | -0.48 | -0.19 | -0.76                      | -0.08 | -0.20  | -0.38 | 0.26     |       |                       |   |        |   |   |   |
| RPneg_400.15634_11.102 | RP    | neg        | 11.102          | 400.1563   |            |      | 4        |         | 0.20208                                 | 0.54699 | -0.37  | -0.25 | -0.10  | 0.55  | 1.04                  | -0.06 | 0.75837 | 0.96233 | -0.01 | 0.13  | 0.12                       | -0.57 | 0.16   | 0.04  | 0.39     |       |                       |   |        |   |   |   |
| RPpos_400.168_10.07    | RP    | pos        | 10.07           | 400.1680   |            |      | 4        |         | 0.63012                                 | 0.84955 | -0.20  | -0.18 | 0.47   | 0.46  | 0.51                  | 1.28  | 0.76313 | 0.96312 | 0.14  | 12.35 | -0.38                      | -0.36 | -0.18  | 0.23  | 0.99     |       |                       |   |        |   |   |   |
| RPpos_400.1682_9.32    | RP    | pos        | 9.32            | 400.1682   |            |      | 4        |         | 0.03103                                 | 0.29633 | -0.65  | 0.11  | -0.91  | -0.53 | -0.09                 | 0.23  | 0.00993 | 0.21165 | -0.41 | 0.25  | -0.15                      | -1.09 | -0.74  | -0.28 | -0.04    |       |                       |   |        |   |   |   |
| RPpos_400.1866_4.16    | RP    | pos        | 4.16            | 400.1866   |            |      | 4        |         | 0.98005                                 | 0.96600 | -0.09  | -0.12 | -0.27  | -0.07 | 0.73                  | -0.15 | 0.78224 | 0.96598 | 0.13  | 0.25  | 0.06                       | 0.11  | 0.21   | 0.19  | -0.06    |       |                       |   |        |   |   |   |
| RPpos_400.2016_7.45    | RP    | pos        | 7.45            | 400.2016   |            |      | 4        |         | 0.28461                                 | 0.61824 | -0.38  | -0.04 | 0.28   | -0.04 | 0.42                  | -0.17 | 0.87395 | 0.98172 | 0.01  | 0.83  | 0.11                       | -0.16 | 0.27   | -0.11 | -1.12    |       |                       |   |        |   |   |   |
| RPpos_400.2277_11.17   | RP    | pos        | 11.17           | 400.2277   |            |      | 4        |         | 0.00922                                 | 0.18803 | 0.96   | -0.02 | 0.49   | 1.24  | 2.45                  | -0.33 | 0.98130 | 0.99752 | -0.03 | -0.18 | 0.31                       | -0.24 | -0.01  | -0.08 | 0.00     |       |                       |   |        |   |   |   |
| RPpos_400.2631_7.43    | RP    | pos        | 7.43            | 400.2631   |            |      | 4        |         | 0.51556                                 | 0.78578 | -0.22  | 0.12  | 0.91   | -0.25 | -0.32                 | 0.70  | 0.28944 | 0.79452 | -0.30 | -0.28 | -0.08                      | -0.32 | 0.02   | -0.39 | -0.34    |       |                       |   |        |   |   |   |
| RPneg_400.26993_8.104  | RP    | neg        | 8.104           | 400.2699   |            |      | 4        |         | 0.59021                                 | 0.82411 | 0.19   | 0.27  | 0.46   | 0.24  | 0.02                  | -0.08 | 0.32961 | 0.82035 | -0.25 | -0.36 | -0.18                      | -0.15 | -0.20  | -0.24 | -0.48    |       |                       |   |        |   |   |   |
| RPpos_400.2726_7.24    | RP    | pos        | 7.24            | 400.2726   |            |      | 4        |         | 0.35349                                 | 0.67299 | -0.31  | -0.24 | 1.07   | -0.22 | -0.14                 | 0.44  | 0.58966 | 0.92655 | -0.21 | -0.27 | 0.07                       | -0.24 | 0.16   | -0.34 | -0.35    |       |                       |   |        |   |   |   |
| HILICpos_400.2894_0.46 | HILIC | pos        | 0.46            | 400.2894   |            |      | 4        |         | 0.41814                                 | 0.72193 | -0.17  | 0.10  | 0.35   | 0.02  | 0.03                  | -0.26 | 0.91954 | 0.98860 | -0.08 | -0.36 | -0.03                      | 0.14  | -0.15  | -0.31 | 0.72     |       |                       |   |        |   |   |   |
| RPpos_400.32789_9.63   | RP    | pos        | 9.63            | 400.32789  |            |      | 4        |         | 0.59227                                 | 0.82500 | -0.12  | -0.13 | 0.09   | 0.19  | 0.23                  | 0.07  | 0.06240 | 0.48574 | 0.56  | 0.35  | 0.27                       | 0.47  | 0.32   | 1.28  | 0.15     |       |                       |   |        |   |   |   |
| RPneg_400.931_7.949    | RP    | neg        | 7.949           | 400.9310   |            |      | 4        |         | 0.71555                                 | 0.88437 | 0.09   | -0.04 | -0.26  | 0.48  | 0.65                  | 0.19  | 0.58883 | 0.94980 | 0.16  | 0.24  | 0.65                       | 0.14  | -0.46  | 2.03  | 2.17     |       |                       |   |        |   |   |   |
| HILICneg_401.0703_2.49 | HILIC | neg        | 2.49            | 401.0703   |            |      | 4        |         | 0.22063                                 | 0.56295 | -0.10  | 0.05  | 0.09   | -0.08 | -0.03                 | 0.04  | 0.28456 | 0.79289 | 0.02  | 0.03  | 0.05                       | 0.02  | 0.08   | 0.06  | 0.04     |       |                       |   |        |   |   |   |
| RPneg_401.08362_6.023  | RP    | neg        | 6.023           | 401.0836   |            |      | 4        |         | 0.42215                                 | 0.72467 | 0.14   | 0.25  | 0.18   | 0.08  | 0.18                  | 0.04  | 0.94906 | 0.99331 | -0.09 | -0.12 | -0.03                      | -0.07 | -0.07  | -0.08 | -0.29    |       |                       |   |        |   |   |   |
| RPneg_401.08701_7.385  | RP    | neg        | 7.385           | 401.0870   |            |      | 4        |         | 0.77740                                 | 0.91240 | -0.06  | 0.40  | 0.35   | -0.21 | -0.31                 | 0.19  | 0.96857 | 0.99673 | -0.06 | 0.08  | -0.02                      | -0.02 | 0.09   | -0.06 | -0.51    |       |                       |   |        |   |   |   |
| HILICneg_401.0876_0.53 | HILIC | neg        | 0.53            | 401.0876   |            |      | 4        |         | 0.77202                                 | 0.91024 | 0.13   | -0.01 | 0.23   | 1.62  | 0.22                  | 0.78  | 0.32638 | 0.81886 | 0.10  | 0.04  | 0.04                       | 0.07  | -0.01  | -0.05 | 0.61     |       |                       |   |        |   |   |   |
| RPneg_401.12708_7.889  | RP    | neg        | 7.889           | 401.1271   |            |      | 4        |         | 0.26663                                 | 0.60291 | 0.44   | -0.03 | 0.48   | 0.84  | 0.34                  | 0.38  | 0.33533 | 0.82321 | 0.20  | 0.66  | 0.25                       | 0.15  | -0.08  | -0.16 | 0.18     |       |                       |   |        |   |   |   |
| RPneg_401.14789_10.761 | RP    | neg        | 10.761          | 401.1479   |            |      | 4        |         | 0.01828                                 | 0.24665 | 0.53   | 0.91  | 0.60   | 0.56  | 0.70                  | 0.25  | 0.95663 | 0.99456 | -0.04 | -0.28 | 0.00                       | 0.06  | 0.16   | 0.15  | -0.45    |       |                       |   |        |   |   |   |
| HILICneg_401.156_5.2   | HILIC | neg        | 5.2             | 401.1560   |            |      | 4        |         | 0.01546                                 | 0.23287 | 0.87   | -0.07 | 0.19   | 0.70  | 2.25                  | -0.33 | 0.95707 | 0.99463 | -0.04 | -0.13 | 0.41                       | -0.23 | -0.20  | -0.16 | -0.05    |       |                       |   |        |   |   |   |
| RPneg_401.15747_6.106  | RP    | neg        | 6.106           | 401.1575   |            |      | 4        |         | 0.78177                                 | 0.91447 | -0.08  | -0.12 | 0.05   | 0.03  | -0.24                 | 0.69  | 0.21781 | 0.73489 | 0.02  | -0.18 | -0.05                      | 0.03  | 0.22   | -0.01 | 0.27     |       |                       |   |        |   |   |   |
| HILICpos_401.1576_5.64 | HILIC | pos        | 5.64            | 401.1576   |            |      | 4        |         | 0.25235                                 | 0.59105 | -0.17  | -0.22 | 0.16   | 0.23  | -0.52                 | 0.10  | 0.10457 | 0.58038 | -0.54 | -0.37 | -0.44                      | -0.54 | -0.19  | -0.10 | -0.41    |       |                       |   |        |   |   |   |
| RPpos_401.1964_7.73    | RP    | pos        | 7.73            | 401.1964   |            |      | 4        |         | 0.65602                                 | 0.85580 | -0.14  | 0.59  | 0.71   | 0.41  | 0.09                  | -0.88 | 0.03774 | 0.39589 | 0.44  | 0.72  | 0.78                       | 0.12  | 0.33   | 1.05  | -0.48    |       |                       |   |        |   |   |   |
| RPneg_401.19684_9.386  | RP    | neg        | 9.386           | 401.1968   |            |      | 4        |         | 0.46973                                 | 0.75693 | -0.20  | -0.25 | 0.50   | -0.24 | -0.37                 | 0.02  | 0.73869 | 0.95923 | -0.16 | -0.10 | 0.21                       | -0.59 | 0.42   | -0.40 | -0.12    |       |                       |   |        |   |   |   |
| HILICneg_401.1972_0.39 | HILIC | neg        | 0.39            | 401.1972   |            |      | 4        |         | 0.53873                                 | 0.79818 | 0.02   | 0.05  | 0.06   | 0.02  | 0.02                  | 0.20  | 0.98651 | 0.99793 | -0.05 | -0.02 | -0.03                      | -0.05 | -0.07  | -0.10 | 0.03     |       |                       |   |        |   |   |   |
| RPneg_401.19952_6.07   | RP    | neg        | 6.07            | 401.1995   |            |      | 4        |         | 0.28202                                 | 0.61605 | 0.03   | -0.04 | 0.11   | -0.07 | 0.24                  | 0.03  | 0.35028 | 0.83122 | -0.03 | 0.03  | 0.00                       | -0.06 | -0.07  | -0.03 | 0.00     |       |                       |   |        |   |   |   |
| HILICneg_401.2019_1.33 | HILIC | neg        | 1.33            | 401.2019   |            |      | 4        |         | 0.07056                                 | 0.38517 | 0.35   | 0.39  | 0.50   | 0.44  | 0.67                  | -0.13 | 0.44966 | 0.89150 | 0.17  | 0.13  | 0.19                       | 0.78  | 0.14   | 0.34  | 0.13     | 0.04  |                       |   |        |   |   |   |
| RPneg_401.20279_3.677  | RP    | neg        | 3.677           | 401.2028   |            |      | 4        |         | 0.20671                                 | 0.54993 | -0.19  | 0.18  | 0.26   | 0.22  | 0.07                  | -0.40 | 0.91940 | 0.98860 | 0.04  | 0.14  | 0.77                       | 0.26  | 0.05   | -0.06 | -0.05    |       |                       |   |        |   |   |   |
| RPneg_401.20325_3.356  | RP    | neg        | 3.356           | 401.2033   |            |      | 4        |         | 0.45556                                 | 0.74769 | -0.17  | 0.12  | 0.22   | -0.15 | -0.12                 | -0.27 | 0.57662 | 0.92304 | -0.13 | 0.21  | 0.58                       | -0.35 | -0.05  | -0.22 | -0.10    |       |                       |   |        |   |   |   |
| RPpos_401.258_11.52    | RP    | pos        | 11.52           | 401.2580   |            |      | 4        |         | 0.17265                                 | 0.51820 | -0.22  | 0.27  | 0.27   | -0.22 | -0.21                 | -0.43 | 0.99273 | 0.99904 | 0.00  | 0.23  | 0.54                       | -0.26 | 0.20   | -0.13 | -0.09    |       |                       |   |        |   |   |   |
| HILICpos_401.2615_0.63 | HILIC | pos        | 0.63            | 401.2615   |            |      | 4        |         | 0.17509                                 | 0.52072 | -0.31  | 0.00  | 0.07   | 0.20  | -0.03                 | 0.04  | 0.91943 | 0.98860 | 0.04  | -0.36 | -0.47                      | -0.22 | 0.48   | 0.23  | 0.62     |       |                       |   |        |   |   |   |
| RPpos_401.262_5.96     | RP    | pos        | 5.96            | 401.2620   |            |      | 4        |         | 0.04948                                 | 0.34580 | -0.43  | -0.14 | 0.28   | 0.00  | -0.54                 | 0.35  | 0.01884 | 0.29189 | -0.39 | -0.45 | -0.33                      | -0.53 | -0.10  | 0.09  | -0.27    |       |                       |   |        |   |   |   |
| RPpos_401.2667_10.59   | RP    | pos        | 10.59           | 401.2667   |            |      | 4        |         | 0.31014                                 | 0.63846 | -0.29  | 0.07  | 0.59   | -0.45 | -0.26                 | 0.43  | 0.01886 | 0.29189 | -0.33 | -0.28 | -0.16                      | -0.34 | -0.13  | -0.08 | -0.41    |       |                       |   |        |   |   |   |
| RPpos_401.2688_9.86    | RP    | pos        | 9.86            | 401.2688   |            |      | 4        |         | 0.54629                                 | 0.80157 | 0.18   | 0.30  | 0.43   | 0.59  | 0.57                  | -0.27 | 0.29614 | 0.79892 | -0.22 | 0.60  | 0.10                       | 0.28  | 0.15   | 0.35  | -0.15    |       |                       |   |        |   |   |   |
| RPpos_401.2894_10.51   | RP    | pos        | 10.51           | 401.2894   |            |      | 4        |         | 0.32876                                 | 0.65331 | -0.33  | 0.18  | 0.52   | -0.21 | 0.17                  | -0.26 | 0.84398 | 0.97670 | -0.13 | 0.42  | 0.10                       | -0.28 | 0.18   | -0.46 | -0.61    |       |                       |   |        |   |   |   |
| RPneg_401.2901_10.904  | RP    | neg        | 10.904          | 401.2901   |            |      | 4        |         | 0.22551                                 | 0.56723 | 0.36   | 0.46  | 0.58   | 0.30  | 0.91                  | -0.59 | 0.63704 | 0.93602 | -0.25 | -0.05 | -0.32                      | -0.11 | -0.13  | -0.11 | -0.15    |       |                       |   |        |   |   |   |
| RPneg_401.2908_10.836  | RP    | neg        | 10.836          | 401.2908   |            |      | 4        |         | 0.87386                                 | 0.95270 | 0.04   | 0.21  | 0.39   | 0.83  | 1.27                  | -0.29 | 0.09721 | 0.56769 | 0.37  | 1.11  | 0.14                       | 0.33  | 0.32   | 0.28  | 0.29     |       |                       |   |        |   |   |   |
| RPpos_401.342_10.54    | RP    | pos        | 10.54           | 401.3420   |            |      | 4        |         | 0.82110                                 | 0.93204 | -0.06  | 0.26  | 0.50   | 0.95  | 0.71                  | -0.30 | 0.14602 | 0.64944 | 0.26  | 0.21  | 0.12                       | 0.52  | 0.12   | 0.23  | 0.24     |       |                       |   |        |   |   |   |
| RPpos_401.3426_10.84   | RP    | pos        | 10.84           | 401.3426   |            |      | 4        |         | 0.89323                                 | 0.96136 | -0.03  | 0.26  | 0.12   | -0.15 | 0.20                  | -0.19 | 0.31625 | 0.81260 | -0.04 | -0.21 | 0.04                       | 0.12  | -0.03  | -0.06 | -0.15    |       |                       |   |        |   |   |   |
| RPpos_401.7375_12.83   | RP    | pos        | 12.83           | 401.7375   |            |      | 4        |         | 0.88362                                 | 0.95686 | -0.07  | 0.12  | 0.49   | -0.18 | 0.14                  | -0.17 | 0.27696 | 0.78625 | -0.18 | 0.19  | 0.39                       | 0.10  | 0.26   | 0.01  | -0.09    |       |                       |   |        |   |   |   |
| RPpos_401.7422_6.97    | RP    | pos        | 6.97            | 401.7422   |            |      | 4        |         | 0.12528                                 | 0.46115 | -0.32  | 0.11  | -0.20  | -0.50 | 0.06                  | -0.76 | 0.81049 | 0.97137 | 0.03  | -0.07 | 0.03                       | 0.13  | 0.08   | 0.12  | -0.22    |       |                       |   |        |   |   |   |
| RPneg_401.7426_7.32    | RP    | neg        | 7.32            | 401.7426   |            |      | 4        |         | 0.86951                                 | 0.95113 | 0.02   |       |        |       |                       |       |         |         |       |       |                            |       |        |       |          |       |                       |   |        |   |   |   |

| Feature_ID             | Mode | Ionization | Average_Rt.min. | Average_Mz | Metabolite | MSMS | ID_Level | HMDB_ID | IV-Alcohol self-administration (IV-ASA) |         |       |       |                       |       |       |       |         |         | IV-Alcohol clamp (IV-AC)   |       |       |       |                       |       |       |   |   |   |
|------------------------|------|------------|-----------------|------------|------------|------|----------|---------|-----------------------------------------|---------|-------|-------|-----------------------|-------|-------|-------|---------|---------|----------------------------|-------|-------|-------|-----------------------|-------|-------|---|---|---|
|                        |      |            |                 |            |            |      |          |         | Area Under the Curve (AUC)              |         |       |       | IV-Ghrelin or Placebo |       |       |       |         |         | Area Under the Curve (AUC) |       |       |       | IV-Ghrelin or Placebo |       |       |   |   |   |
|                        |      |            |                 |            |            |      |          |         | p                                       | q       | d     | d     | d                     | d     | d     | d     | d       | d       | p                          | q     | d     | d     | d                     | d     | d     | d | d | d |
| RPneg_403.66849_6.283  | RP   | neg        | 6.283           | 403.6685   |            |      | 4        |         | 0.71594                                 | 0.88437 | -0.01 | 0.03  | 0.01                  | -0.04 | 0.00  | 0.21  | 0.05777 | 0.47280 | -0.09                      | -0.11 | -0.10 | -0.12 | -0.09                 | -0.07 | -0.01 |   |   |   |
| RPpos_403.7395_5.96    | RP   | pos        | 5.96            | 403.7395   |            |      | 4        |         | 0.37785                                 | 0.69288 | -0.24 | 0.10  | 0.59                  | -0.45 | -0.21 | 0.73  | 0.11358 | 0.59703 | -0.28                      | -0.33 | -0.15 | -0.19 | -0.10                 | -0.06 | -0.41 |   |   |   |
| RPpos_403.7546_12.67   | RP   | pos        | 12.67           | 403.7546   |            |      | 4        |         | 0.52416                                 | 0.78980 | -0.16 | 0.08  | -0.16                 | -0.58 | 0.37  | 0.51  | 0.86225 | 0.97982 | 0.01                       | -0.04 | 0.37  | -0.20 | 0.35                  | 0.17  | -0.30 |   |   |   |
| RPpos_403.7726_13.49   | RP   | pos        | 13.49           | 403.7726   |            |      | 4        |         | 0.92306                                 | 0.97235 | -0.06 | 0.47  | 0.34                  | -0.13 | 0.58  | -0.14 | 0.53801 | 0.91464 | 0.45                       | 0.29  | 0.26  | 0.39  | 0.41                  | -0.04 | 0.26  |   |   |   |
| RPpos_403.7822_13.2    | RP   | pos        | 13.2            | 403.7822   |            |      | 4        |         | 0.84555                                 | 0.94418 | -0.01 | 0.26  | 0.43                  | 0.00  | 0.28  | 0.87  | 0.05853 | 0.47550 | 0.93                       | 0.57  | 0.63  | 0.28  | 0.48                  | 0.02  | -0.02 |   |   |   |
| HILCneg_403.8660_1.43  | HILC | neg        | 1.43            | 403.8660   |            |      | 4        |         | 0.15886                                 | 0.50188 | -0.04 | 0.43  | 0.47                  | 0.61  | 0.64  | 0.64  | 0.00040 | 0.03344 | -1.11                      | -1.32 | 1.60  | -0.43 | 0.88                  | 0.80  | 0.40  |   |   |   |
| HILCneg_403.8687_0.41  | HILC | neg        | 0.41            | 403.8687   |            |      | 4        |         | 0.90625                                 | 0.96548 | -0.04 | -0.30 | 0.20                  | 0.22  | 0.30  | -0.28 | 0.75348 | 0.96233 | -0.06                      | 0.27  | -1.14 | 0.13  | -0.77                 | 0.22  | 0.35  |   |   |   |
| HILCneg_403.8689_0.56  | HILC | neg        | 0.56            | 403.8689   |            |      | 4        |         | 0.53266                                 | 0.79472 | -0.23 | 0.02  | -0.04                 | 0.18  | 0.06  | 0.44  | 0.75280 | 0.96219 | 0.04                       | 0.18  | -0.06 | -0.17 | -0.07                 | 0.51  | 0.21  |   |   |   |
| HILCneg_403.8690_0.94  | HILC | neg        | 0.94            | 403.8690   |            |      | 4        |         | 0.00069                                 | 0.05157 | -0.97 | -0.63 | -0.47                 | -0.74 | -0.81 | -1.17 | 0.36868 | 0.84006 | 0.15                       | 0.27  | 0.03  | 0.35  | 0.28                  | 0.13  | -0.10 |   |   |   |
| HILCneg_403.8692_3.88  | HILC | neg        | 3.88            | 403.8692   |            |      | 4        |         | 0.35911                                 | 0.67767 | -0.25 | 0.35  | -0.01                 | -0.42 | 0.39  | -0.22 | 0.46997 | 0.89010 | -0.14                      | 0.31  | -0.18 | 0.10  | -0.07                 | -0.39 | 0.02  |   |   |   |
| HILCneg_403.9031_1.5   | HILC | neg        | 1.5             | 403.9031   |            |      | 4        |         | 0.00496                                 | 0.14032 | -0.52 | -0.32 | -0.38                 | -0.51 | -0.40 | -0.18 | 0.00008 | 0.01014 | -0.60                      | -0.65 | -0.37 | -0.53 | -0.57                 | -0.67 | -0.70 |   |   |   |
| HILCneg_404.0273_6.29  | HILC | neg        | 6.29            | 404.0273   |            |      | 4        |         | 0.63272                                 | 0.84427 | 0.08  | 0.18  | 0.41                  | 0.46  | -0.01 | -0.66 | 0.00004 | 0.00615 | 0.65                       | 0.40  | 0.76  | 1.15  | 0.53                  | 0.45  | -0.89 |   |   |   |
| RPneg_404.14194_11.323 | RP   | neg        | 11.323          | 404.1419   |            |      | 4        |         | 0.71561                                 | 0.88437 | -0.06 | -0.40 | -0.17                 | 0.44  | 0.47  | -0.04 | 0.63185 | 0.93546 | -0.11                      | -0.22 | -0.20 | -0.56 | -0.05                 | 0.12  | 0.72  |   |   |   |
| RPneg_404.15036_10.637 | RP   | neg        | 10.637          | 404.1504   |            |      | 4        |         | 0.35803                                 | 0.67699 | 0.38  | -0.13 | -0.04                 | 1.01  | 3.04  | -0.07 | 0.54930 | 0.91721 | -0.06                      | 0.18  | 0.15  | -0.12 | -0.12                 | -0.25 | -0.09 |   |   |   |
| RPpos_404.1857_9.82    | RP   | pos        | 9.82            | 404.1857   |            |      | 4        |         | 0.43299                                 | 0.73195 | 0.32  | 0.53  | -0.16                 | 0.97  | 0.62  | 0.52  | 0.40871 | 0.86241 | 0.51                       | 0.32  | 0.05  | 1.45  | 0.04                  | 0.65  | 0.34  |   |   |   |
| RPpos_404.2518_7.05    | RP   | pos        | 7.05            | 404.2518   |            |      | 4        |         | 0.77658                                 | 0.91211 | 0.04  | 0.38  | 0.48                  | 0.30  | 0.01  | 0.92  | 0.96204 | 0.99564 | -0.03                      | 0.00  | 0.29  | -0.02 | 0.22                  | -1.07 | -0.38 |   |   |   |
| RPpos_404.3013_10.16   | RP   | pos        | 10.16           | 404.3013   |            |      | 4        |         | 0.60400                                 | 0.83136 | -0.01 | 0.49  | 0.29                  | 0.02  | 0.37  | 0.21  | 0.13443 | 0.63138 | 1.09                       | -0.88 | 0.11  | -0.97 | -0.87                 | -0.90 | -0.44 |   |   |   |
| RPpos_404.3013_10.34   | RP   | pos        | 10.34           | 404.3013   |            |      | 4        |         | 0.29668                                 | 0.62767 | -0.12 | 0.55  | -0.10                 | -0.30 | 0.43  | 0.03  | 0.65117 | 0.93978 | -0.29                      | -0.56 | 0.27  | -0.35 | 0.10                  | -0.49 | 0.13  |   |   |   |
| HILCneg_405.0279_0.7   | HILC | neg        | 0.7             | 405.0279   |            |      | 4        |         | 0.18013                                 | 0.52555 | -0.41 | -0.04 | -0.09                 | -0.50 | 0.23  | 0.08  | 0.68408 | 0.94838 | -0.03                      | 0.43  | 0.22  | 0.28  | 0.28                  | 0.09  | -0.24 |   |   |   |
| HILCneg_405.0281_0.69  | HILC | neg        | 0.69            | 405.0281   |            |      | 4        |         | 0.63510                                 | 0.84542 | 0.09  | -0.04 | 0.51                  | 0.53  | 0.32  | 0.49  | 0.00231 | 0.09449 | 0.47                       | 0.29  | 0.24  | 0.67  | 0.64                  | 0.39  | 0.05  |   |   |   |
| HILCneg_405.0286_0.88  | HILC | neg        | 0.88            | 405.0286   |            |      | 4        |         | 0.15202                                 | 0.49491 | -0.52 | 0.09  | 0.09                  | -0.15 | -0.35 | -0.31 | 0.16062 | 0.67002 | -0.28                      | 0.80  | -1.08 | 1.08  | 0.07                  | 0.50  | 0.11  |   |   |   |
| HILCneg_405.029_0.58   | HILC | neg        | 0.58            | 405.0290   |            |      | 4        |         | 0.03173                                 | 0.29834 | -0.57 | -0.26 | -0.29                 | -0.52 | -0.22 | -0.50 | 0.92405 | 0.98905 | 0.25                       | 1.03  | 0.52  | 0.11  | -0.06                 | 0.10  | -0.14 |   |   |   |
| HILCneg_405.029_0.99   | HILC | neg        | 0.99            | 405.0290   |            |      | 4        |         | 0.10238                                 | 0.43509 | -0.43 | 0.19  | -0.15                 | -0.24 | -0.19 | -0.13 | 0.08916 | 0.55184 | 0.26                       | 0.68  | 0.51  | 0.12  | -0.23                 | 0.15  | 0.24  |   |   |   |
| HILCneg_405.029_5.97   | HILC | neg        | 5.97            | 405.0290   |            |      | 4        |         | 0.10623                                 | 0.43954 | -0.35 | -0.01 | 0.23                  | -0.19 | -0.40 | 0.16  | 0.24502 | 0.76099 | 0.07                       | 0.46  | 0.32  | 0.12  | -0.16                 | -0.04 | -0.27 |   |   |   |
| HILCneg_405.0424_0.49  | HILC | neg        | 0.49            | 405.0424   |            |      | 4        |         | 0.96158                                 | 0.98629 | -0.04 | 0.11  | 0.20                  | -0.09 | 0.00  | 0.34  | 0.36528 | 0.83821 | -0.15                      | -0.12 | -0.13 | -0.15 | -0.10                 | -0.16 | -0.09 |   |   |   |
| HILCpos_405.0861_5.57  | HILC | pos        | 5.57            | 405.0861   |            |      | 4        |         | 0.06439                                 | 0.37403 | -0.49 | 0.00  | -0.48                 | -0.14 | -0.10 | -1.10 | 0.20654 | 0.72323 | -0.26                      | -0.17 | -0.28 | 0.16  | -0.51                 | -0.41 | 0.03  |   |   |   |
| RPneg_405.11264_11.315 | RP   | neg        | 11.315          | 405.1126   |            |      | 4        |         | 0.01819                                 | 0.24592 | -0.50 | -0.39 | -0.34                 | -0.02 | -0.14 | -0.13 | 0.33716 | 0.82417 | -0.13                      | -0.16 | -0.54 | -0.01 | 0.32                  | 0.08  | 0.32  |   |   |   |
| RPneg_405.11865_6.741  | RP   | neg        | 6.741           | 405.1187   |            |      | 4        |         | 0.09099                                 | 0.41995 | 3.71  | 2.55  | 1.13                  | 4.88  | 5.72  | 0.37  | 0.30113 | 0.80276 | 18.50                      | 17.61 | 13.10 | 11.13 | 15.08                 | 15.71 | 13.54 |   |   |   |
| RPpos_405.1503_6.95    | RP   | pos        | 6.95            | 405.1503   |            |      | 4        |         | 0.92822                                 | 0.97436 | -0.07 | 0.19  | 0.19                  | 0.04  | -0.05 | -0.09 | 0.29523 | 0.79878 | 0.10                       | 0.14  | 0.00  | 0.26  | -0.01                 | 0.09  | 0.09  |   |   |   |
| RPpos_405.1545_10.91   | RP   | pos        | 10.91           | 405.1545   |            |      | 4        |         | 0.07195                                 | 0.38813 | 0.61  | 0.11  | 0.31                  | 0.40  | 1.56  | -0.12 | 0.80155 | 0.96981 | -0.15                      | -0.44 | 0.35  | -0.21 | -0.23                 | -0.28 | 0.06  |   |   |   |
| RPneg_405.15952_13.189 | RP   | neg        | 13.189          | 405.1595   |            |      | 4        |         | 0.32731                                 | 0.65211 | -0.21 | 0.57  | -0.48                 | -0.06 | -0.05 | 0.29  | 0.67991 | 0.94745 | -0.15                      | -0.14 | -0.36 | -0.29 | 0.27                  | 0.11  | -0.40 |   |   |   |
| RPneg_405.17664_6.124  | RP   | neg        | 6.124           | 405.1766   |            |      | 4        |         | 0.00094                                 | 0.06221 | 0.98  | 0.37  | 1.84                  | 1.18  | 0.21  | 0.16  | 0.00589 | 0.16200 | 1.13                       | 0.30  | 0.74  | 1.73  | 1.47                  | 1.33  | 0.15  |   |   |   |
| HILCneg_405.1911_0.46  | HILC | neg        | 0.46            | 405.1913   |            |      | 4        |         | 0.00220                                 | 0.09516 | 0.45  | -0.09 | -0.29                 | 0.63  | 0.35  | -0.53 | 0.07358 | 0.51514 | 0.44                       | 0.11  | -0.08 | 0.27  | 0.63                  | 1.08  | -0.24 |   |   |   |
| RPneg_405.24963_8.523  | RP   | neg        | 8.523           | 405.2496   |            |      | 4        |         | 0.12134                                 | 0.55492 | -0.29 | 0.70  | -0.33                 | -0.38 | -0.16 | -0.39 | 0.30914 | 0.80799 | 0.28                       | -0.85 | -0.31 | -0.15 | 0.42                  | 0.32  | 0.06  |   |   |   |
| RPpos_405.251_11.51    | RP   | pos        | 11.51           | 405.2510   |            |      | 4        |         | 0.39194                                 | 0.70257 | 0.18  | 0.15  | 0.10                  | 0.40  | 0.05  | 0.43  | 0.13186 | 0.62692 | 0.13                       | -0.02 | 0.16  | 0.22  | 0.13                  | 0.23  | -0.71 |   |   |   |
| RPpos_405.2583_7.32    | RP   | pos        | 7.32            | 405.2583   |            |      | 4        |         | 0.41306                                 | 0.71794 | -0.26 | -0.14 | 0.88                  | -0.10 | -0.31 | 0.34  | 0.88589 | 0.98286 | -0.09                      | -0.27 | 0.02  | 0.13  | 0.29                  | -0.24 | -0.36 |   |   |   |
| RPneg_405.26389_8.5    | RP   | neg        | 8.5             | 405.2639   |            |      | 4        |         | 0.91242                                 | 0.96773 | -0.02 | 0.06  | 0.07                  | -0.04 | 0.01  | -0.04 | 0.14086 | 0.64274 | -0.42                      | -0.42 | -0.44 | -0.50 | -0.37                 | -0.39 | -0.32 |   |   |   |
| RPneg_405.26459_10.911 | RP   | neg        | 10.911          | 405.2646   |            |      | 4        |         | 0.93799                                 | 0.97750 | 0.06  | -0.24 | 0.36                  | -0.10 | 0.68  | 0.30  | 0.06803 | 0.50163 | 0.35                       | -0.32 | -0.09 | 1.22  | 0.22                  | 0.08  | 0.24  |   |   |   |
| HILCneg_405.7312_1.45  | HILC | neg        | 1.45            | 405.7312   |            |      | 4        |         | 0.53938                                 | 0.79830 | -0.19 | -0.01 | -0.29                 | 0.25  | -0.04 | 0.33  | 0.03162 | 0.36926 | -0.50                      | -0.35 | -0.47 | -0.74 | -0.24                 | -0.37 | -0.26 |   |   |   |
| HILCneg_405.8651_0.56  | HILC | neg        | 0.56            | 405.8651   |            |      | 4        |         | 0.47120                                 | 0.75828 | -0.23 | -0.16 | -0.13                 | 0.18  | 0.22  | -0.25 | 0.53249 | 0.91290 | 0.01                       | 0.21  | -0.10 | -0.11 | 0.02                  | 0.09  | 0.08  |   |   |   |
| HILCneg_406.0632_0.49  | HILC | neg        | 0.49            | 406.0632   |            |      | 4        |         | 0.13668                                 | 0.47649 | 0.20  | 0.18  | 0.33                  | 0.16  | 0.24  | 0.51  | 0.16027 | 0.66924 | -0.21                      | -0.20 | -0.23 | -0.22 | -0.18                 | -0.20 | -0.07 |   |   |   |
| RPneg_406.10425_1.404  | RP   | neg        | 1.404           | 406.1043   |            |      | 4        |         | 0.20123                                 | 0.54594 | 0.28  | 0.41  | 1.41                  | 0.16  | -0.16 | -0.51 | 0.02986 | 0.36003 | 0.89                       | 0.45  | 1.66  | 1.58  | 0.79                  | -0.03 | -0.56 |   |   |   |
| RPneg_406.13208_7.553  | RP   | neg        | 7.553           | 406.1321   |            |      | 4        |         | 0.06135                                 | 0.36873 | -0.29 | -0.22 | -0.11                 | -0.26 | -0.23 | -0.23 | 0.01255 | 0.24002 | 1.16                       | 1.35  | 1.40  | 1.26  | 1.29                  | 1.26  | 0.84  |   |   |   |
| RPneg_406.13358_7.68   | RP   | neg        | 7.68            | 406.1336   |            |      | 4        |         | 0.28438                                 | 0.61802 | -0.19 | -0.20 | -0.08                 | -0.15 | -0.05 | -0.14 | 0.00887 | 0.20057 | 1.15                       | 1.44  | 1.43  | 1.27  | 1.14                  | 1.03  | 0.2   |   |   |   |

|                        |       | IV-Alcohol self-administration (IV-ASA) |                 |            |            |          |          |         |                                         |         |       |          |                       | IV-Alcohol clamp (IV-AC) |       |        |                            |         |       |          |                          |                       |       |       |         |        |   |   |   |   |   |   |   |   |   |   |
|------------------------|-------|-----------------------------------------|-----------------|------------|------------|----------|----------|---------|-----------------------------------------|---------|-------|----------|-----------------------|--------------------------|-------|--------|----------------------------|---------|-------|----------|--------------------------|-----------------------|-------|-------|---------|--------|---|---|---|---|---|---|---|---|---|---|
| Feature_ID             | Mode  | Ionization                              | Average_Rt.min. | Average_Mz | Metabolite | MS/MS    | ID_Level | HMDB_ID | IV-Alcohol self-administration (IV-ASA) |         |       |          |                       |                          |       |        |                            |         |       |          | IV-Alcohol clamp (IV-AC) |                       |       |       |         |        |   |   |   |   |   |   |   |   |   |   |
|                        |       |                                         |                 |            |            |          |          |         | Area Under the Curve (AUC)              |         |       | Baseline | IV-Ghrelin or Placebo |                          |       | BraC=0 | Area Under the Curve (AUC) |         |       | Baseline | Post-LD                  | IV-Ghrelin or Placebo |       |       | Post-AC | BraC=0 |   |   |   |   |   |   |   |   |   |   |
|                        |       |                                         |                 |            |            |          |          |         | p                                       | q       | d     | d        | d                     | d                        | d     | d      | p                          | q       | d     | d        | d                        | d                     | d     | d     | d       | p      | q | d | d | d | d | d | d | d | d | d |
| RPneg_407.27875_9.227  | RP    | neg                                     | 9.227           | 407.2788   |            |          | 4        |         | 0.12763                                 | 0.46409 | -0.37 | -0.11    | -0.30                 | -0.36                    | -0.27 | -0.58  | 0.01420                    | 0.25402 | 0.53  | 0.00     | 0.36                     | 0.64                  | 0.75  | 0.72  | 0.72    | 0.54   |   |   |   |   |   |   |   |   |   |   |
| RPpos_407.2798_10.21   | RP    | pos                                     | 10.21           | 407.2798   |            |          | 4        |         | 0.87839                                 | 0.95453 | -0.11 | -0.03    | 0.12                  | 0.77                     | 0.03  | 0.75   | 0.45281                    | 0.88300 | 0.02  | -0.15    | 0.04                     | 0.50                  | -0.15 | 0.09  | -0.52   |        |   |   |   |   |   |   |   |   |   |   |
| RPneg_407.27982_7.362  | RP    | neg                                     | 7.362           | 407.2798   |            |          | 4        |         | 0.79799                                 | 0.92199 | -0.02 | 0.14     | 0.01                  | 0.03                     | 0.08  | -0.15  | 0.53801                    | 0.91464 | -0.21 | -0.24    | -0.35                    | -0.18                 | -0.16 | -0.12 | 0.07    |        |   |   |   |   |   |   |   |   |   |   |
| RPneg_407.28015_8.523  | RP    | neg                                     | 8.523           | 407.2802   |            |          | 4        |         | 0.42252                                 | 0.72470 | -0.12 | 0.08     | 0.08                  | -0.11                    | -0.13 | -0.89  | 0.73781                    | 0.95899 | -0.12 | -0.32    | -0.24                    | -0.17                 | -0.13 | -0.07 | 0.45    |        |   |   |   |   |   |   |   |   |   |   |
| RPneg_407.29184_10.172 | RP    | neg                                     | 10.172          | 407.2918   |            |          | 4        |         | 0.71049                                 | 0.88102 | 0.11  | -0.08    | 0.60                  | 0.01                     | 0.02  | 0.86   | 0.59081                    | 0.96981 | -0.04 | -0.08    | -0.08                    | -0.17                 | 0.05  | -0.02 | 0.82    |        |   |   |   |   |   |   |   |   |   |   |
| RPpos_9.6183           | RP    | pos                                     | 9.6183          | 407.3156   |            |          | 4        |         | 0.03250                                 | 0.30133 | 0.49  | 0.19     | 0.53                  | 0.29                     | 0.52  | 0.33   | 0.12337                    | 0.62038 | 0.63  | 0.13     | 0.42                     | 0.84                  | 0.96  | 1.06  | 0.89    |        |   |   |   |   |   |   |   |   |   |   |
| HILICpos_407.7556_0.94 | HILIC | pos                                     | 0.94            | 407.7556   |            |          | 4        |         | 0.63264                                 | 0.84427 | 0.08  | 0.18     | 0.37                  | 0.03                     | 0.46  | -0.49  | 0.02913                    | 0.35585 | -0.46 | -0.59    | -0.41                    | -0.45                 | -0.26 | -0.37 | -0.77   |        |   |   |   |   |   |   |   |   |   |   |
| HILICneg_407.8638_0.94 | HILIC | neg                                     | 0.94            | 407.8638   |            |          | 4        |         | 0.15077                                 | 0.49300 | -0.22 | -0.06    | 0.00                  | -0.47                    | 0.03  | 0.07   | 0.10224                    | 0.57601 | -0.31 | -0.12    | -0.38                    | 0.29                  | -0.49 | -0.20 | -0.59   |        |   |   |   |   |   |   |   |   |   |   |
| RPneg_408.16159_10.915 | RP    | neg                                     | 10.915          | 408.1616   |            |          | 4        |         | 0.05945                                 | 0.36516 | 0.70  | -0.05    | 0.48                  | 1.02                     | 1.88  | -0.08  | 0.71848                    | 0.95518 | -0.09 | -0.33    | 0.26                     | -0.33                 | -0.04 | -0.05 | -0.06   |        |   |   |   |   |   |   |   |   |   |   |
| RPpos_408.1963_10.61   | RP    | pos                                     | 10.61           | 408.1963   |            |          | 4        |         | 0.41109                                 | 0.71620 | 0.26  | 0.00     | 0.43                  | 1.02                     | 0.56  | -0.29  | 0.30997                    | 0.80838 | 0.15  | 0.31     | 0.17                     | -0.06                 | 0.02  | 0.36  | 0.01    |        |   |   |   |   |   |   |   |   |   |   |
| RPpos_408.2224_6.49    | RP    | pos                                     | 6.49            | 408.2224   |            |          | 4        |         | 0.31364                                 | 0.64132 | -0.41 | 0.02     | 0.32                  | -0.58                    | 0.70  | 0.09   | 0.92095                    | 0.98863 | 0.04  | 0.93     | -0.08                    | 0.18                  | -0.06 | -0.32 | -0.37   |        |   |   |   |   |   |   |   |   |   |   |
| HILICpos_408.2226_0.39 | HILIC | pos                                     | 0.39            | 408.2226   |            |          | 4        |         | 0.07590                                 | 0.39583 | -0.61 | 0.00     | -0.28                 | -0.34                    | -0.13 | 0.27   | 0.91916                    | 0.98860 | 0.09  | 0.70     | -0.36                    | 0.52                  | 0.00  | 0.48  | -0.23   |        |   |   |   |   |   |   |   |   |   |   |
| HILICpos_408.2227_5.64 | HILIC | pos                                     | 5.64            | 408.2227   |            |          | 4        |         | 0.65824                                 | 0.85683 | 0.05  | 0.19     | 0.48                  | 0.31                     | 0.14  | -0.26  | 0.00000                    | 0.00027 | 0.76  | 0.80     | 0.52                     | 1.18                  | 0.67  | 0.43  | 0.12    |        |   |   |   |   |   |   |   |   |   |   |
| RPpos_408.2518_5.96    | RP    | pos                                     | 5.96            | 408.2518   |            |          | 4        |         | 0.89367                                 | 0.96156 | -0.04 | -0.28    | 0.50                  | 0.11                     | 0.17  | 0.40   | 0.63286                    | 0.93546 | -0.16 | -0.24    | -0.24                    | -0.24                 | 0.11  | -0.19 | -0.15   |        |   |   |   |   |   |   |   |   |   |   |
| HILICpos_408.2595_3.5  | HILIC | pos                                     | 3.5             | 408.2595   |            |          | 4        |         | 0.02133                                 | 0.26302 | 0.88  | 0.23     | 0.38                  | 1.01                     | 0.53  | 0.21   | 0.53591                    | 0.91827 | 0.29  | 1.09     | -0.49                    | 0.12                  | 0.35  | 0.58  | -0.96   |        |   |   |   |   |   |   |   |   |   |   |
| RPpos_408.3075_10.97   | RP    | pos                                     | 10.97           | 408.3075   |            |          | 4        |         | 0.25747                                 | 0.59561 | -0.45 | -0.19    | -0.07                 | -0.03                    | -0.37 | -0.54  | 0.57277                    | 0.92224 | 0.26  | 1.27     | -0.30                    | 0.44                  | 0.02  | 0.13  | 0.58    |        |   |   |   |   |   |   |   |   |   |   |
| RPpos_408.3077_11.07   | RP    | pos                                     | 11.07           | 408.3077   |            |          | 4        |         | 0.15481                                 | 0.49781 | -0.53 | -0.15    | -0.06                 | -0.21                    | -0.44 | -0.45  | 0.52544                    | 0.91002 | 0.27  | 1.19     | -0.32                    | 0.52                  | -0.02 | 0.18  | 0.68    |        |   |   |   |   |   |   |   |   |   |   |
| RPpos_408.3102_9.54    | RP    | pos                                     | 9.54            | 408.3102   |            |          | 4        |         | 0.00469                                 | 0.13733 | 0.87  | 0.33     | 1.37                  | 0.86                     | 0.94  | 1.16   | 0.80884                    | 0.97092 | 0.08  | -0.24    | 0.10                     | 0.14                  | 0.09  | 0.27  | -0.11   |        |   |   |   |   |   |   |   |   |   |   |
| RPpos_408.3675_10.94   | RP    | pos                                     | 10.94           | 408.3675   |            |          | 4        |         | 0.08525                                 | 0.41134 | -0.57 | -0.38    | -0.89                 | -0.19                    | -0.11 | -0.36  | 0.15580                    | 0.66220 | -0.51 | 0.01     | -0.26                    | -0.38                 | -0.22 | 0.17  | -0.41   |        |   |   |   |   |   |   |   |   |   |   |
| RPpos_408.7468_12.32   | RP    | pos                                     | 12.32           | 408.7468   |            |          | 4        |         | 0.51983                                 | 0.78761 | -0.20 | -0.10    | -0.08                 | 0.46                     | 0.11  | 0.25   | 0.05881                    | 0.75822 | -0.37 | -0.36    | -0.37                    | -0.63                 | -0.35 | -0.40 |         |        |   |   |   |   |   |   |   |   |   |   |
| HILICpos_408.7522_1.68 | HILIC | pos                                     | 1.68            | 408.7522   |            |          | 4        |         | 0.26308                                 | 0.60023 | -0.22 | -0.18    | 0.48                  | 0.24                     | 0.54  | 0.41   | 0.57465                    | 0.92285 | -0.17 | -0.30    | -0.21                    | -0.24                 | 0.04  | -0.22 | -0.20   |        |   |   |   |   |   |   |   |   |   |   |
| HILICpos_408.7635_0.94 | HILIC | pos                                     | 0.94            | 408.7635   |            |          | 4        |         | 0.73659                                 | 0.89361 | 0.06  | 0.60     | 0.09                  | 0.03                     | 0.51  | -0.29  | 0.00134                    | 0.06787 | -0.49 | -0.68    | -0.49                    | -0.38                 | -0.36 | -0.33 | -0.77   |        |   |   |   |   |   |   |   |   |   |   |
| RPpos_408.7738_10.75   | RP    | pos                                     | 10.75           | 408.7738   |            |          | 4        |         | 0.02140                                 | 0.26302 | 0.77  | 0.08     | 0.02                  | 0.55                     | 2.75  | -0.45  | 0.15551                    | 0.66189 | -0.20 | -0.12    | 0.27                     | -0.48                 | -0.44 | -0.25 | -0.14   |        |   |   |   |   |   |   |   |   |   |   |
| HILICneg_408.9934_2.57 | HILIC | neg                                     | 2.57            | 408.9934   |            |          | 4        |         | 0.00848                                 | 0.18040 | -0.60 | -0.32    | -0.34                 | -0.43                    | -0.83 | 0.38   | 0.29587                    | 0.79880 | -0.60 | -0.61    | 0.06                     | -0.73                 | -0.73 | -0.79 | 0.27    |        |   |   |   |   |   |   |   |   |   |   |
| RPneg_409.03436_3.576  | RP    | neg                                     | 3.576           | 409.0344   |            |          | 4        |         | 0.01768                                 | 0.24243 | 0.54  | 0.44     | 0.43                  | 0.46                     | 0.95  | 0.56   | 0.58704                    | 0.92552 | 0.22  | 0.08     | 0.13                     | 0.20                  | 0.42  | 0.11  | 0.43    |        |   |   |   |   |   |   |   |   |   |   |
| HILICneg_409.1404_0.65 | HILIC | neg                                     | 0.65            | 409.1404   |            |          | 4        |         | 0.00917                                 | 0.18760 | -0.52 | -0.32    | 0.40                  | -0.35                    | -0.48 | -0.49  | 0.66174                    | 0.94270 | -0.11 | -0.09    | 0.38                     | -0.38                 | 0.15  | -0.18 | -0.28   |        |   |   |   |   |   |   |   |   |   |   |
| RPneg_409.14197_9.782  | RP    | neg                                     | 9.782           | 409.1420   |            |          | 4        |         | 0.33489                                 | 0.65822 | -0.28 | -0.13    | -0.27                 | -0.24                    | 0.30  | -0.49  | 0.59912                    | 0.92780 | 0.16  | 0.06     | -0.31                    | -0.30                 | 0.45  | 0.08  | 1.06    |        |   |   |   |   |   |   |   |   |   |   |
| RPneg_409.14758_8.457  | RP    | neg                                     | 8.457           | 409.1476   |            |          | 4        |         | 0.21145                                 | 0.55416 | -0.35 | -0.31    | 0.35                  | -0.23                    | -0.03 | 0.06   | 0.91748                    | 0.98820 | 0.03  | 0.35     | 0.19                     | -0.58                 | -0.19 | 0.44  | -0.64   |        |   |   |   |   |   |   |   |   |   |   |
| RPneg_409.15765_13.186 | RP    | neg                                     | 13.186          | 409.1577   |            |          | 4        |         | 0.24901                                 | 0.58845 | -0.33 | 0.55     | -0.36                 | -0.32                    | 0.10  | 0.17   | 0.34022                    | 0.82596 | -0.21 | 0.05     | -0.24                    | -0.23                 | -0.12 | -0.39 | 0.04    |        |   |   |   |   |   |   |   |   |   |   |
| RPpos_409.1607_9.77    | RP    | pos                                     | 9.77            | 409.1607   |            |          | 4        |         | 0.72274                                 | 0.88677 | 0.16  | 0.07     | 0.04                  | 0.33                     | 0.37  | 0.22   | 0.05551                    | 0.46528 | -0.10 | -0.10    | -0.22                    | -0.25                 | -0.02 | -0.07 | 0.19    |        |   |   |   |   |   |   |   |   |   |   |
| RPpos_409.1827_4.26    | RP    | pos                                     | 4.26            | 409.1827   |            |          | 4        |         | 0.60250                                 | 0.83031 | -0.17 | 0.05     | 0.60                  | 0.39                     | -0.48 | 0.26   | 0.19556                    | 0.71015 | -0.35 | -0.13    | -0.08                    | -0.61                 | 0.31  | -0.07 | -0.95   |        |   |   |   |   |   |   |   |   |   |   |
| HILICpos_409.1828_0.62 | HILIC | pos                                     | 0.62            | 409.1828   |            |          | 4        |         | 0.19940                                 | 0.54392 | -0.37 | -0.33    | 0.58                  | 0.15                     | -0.28 | -0.41  | 0.51123                    | 0.90555 | -0.30 | -0.25    | -0.19                    | -0.31                 | 0.04  | 0.08  | -0.62   |        |   |   |   |   |   |   |   |   |   |   |
| RPpos_409.1862_2.82    | RP    | pos                                     | 2.82            | 409.1862   |            |          | 4        |         | 0.06217                                 | 0.36921 | -0.20 | 0.08     | 0.51                  | -0.11                    | -0.66 | -0.64  | 0.60938                    | 0.93014 | 0.08  | 0.07     | 0.14                     | 0.18                  | 0.22  | -0.03 | -0.33   |        |   |   |   |   |   |   |   |   |   |   |
| RPpos_409.1866_2.4     | RP    | pos                                     | 2.4             | 409.1866   |            |          | 4        |         | 0.09343                                 | 0.42290 | 0.21  | 0.14     | 0.53                  | -0.21                    | 0.65  | -0.56  | 0.76320                    | 0.96312 | 0.01  | -0.11    | 0.07                     | 0.20                  | 0.17  | -0.13 | -0.44   |        |   |   |   |   |   |   |   |   |   |   |
| RPneg_409.18927_10.919 | RP    | neg                                     | 10.919          | 409.1893   |            |          | 4        |         | 0.00438                                 | 0.13391 | 1.02  | -0.08    | 0.58                  | 0.89                     | 2.01  | 0.02   | 0.67766                    | 0.94718 | -0.16 | -0.40    | 0.20                     | -0.28                 | -0.15 | -0.21 | -0.10   |        |   |   |   |   |   |   |   |   |   |   |
| RPpos_409.1984_10.16   | RP    | pos                                     | 10.16           | 409.1984   |            |          | 4        |         | 0.61325                                 | 0.83488 | 0.20  | 0.48     | 0.50                  | 0.08                     | 0.42  | 0.07   | 0.30422                    | 0.80438 | -0.52 | -0.34    | 0.18                     | -0.41                 | -0.22 | -0.79 | -0.09   |        |   |   |   |   |   |   |   |   |   |   |
| RPneg_409.2049_11.616  | RP    | neg                                     | 11.616          | 409.2049   |            |          | 4        |         | 0.00628                                 | 0.15550 | 1.50  | 0.19     | 0.35                  | 0.73                     | 3.18  | -0.80  | 0.19680                    | 0.71250 | -0.14 | 0.44     | -0.09                    | -0.18                 | -0.46 | -0.15 | -0.09   |        |   |   |   |   |   |   |   |   |   |   |
| HILICpos_409.2195_0.95 | HILIC | pos                                     | 0.95            | 409.2195   |            | no MS/MS | 4        |         | 0.08759                                 | 0.41391 | -0.58 | -0.14    | -0.04                 | -0.13                    | -0.12 | -0.28  | 0.61035                    | 0.93036 | 0.00  | -0.13    | -0.03                    | -0.13                 | -0.36 | 0.34  | 0.17    |        |   |   |   |   |   |   |   |   |   |   |
| RPneg_409.2225_7.52    | RP    | neg                                     | 7.52            | 409.2225   |            | no MS/MS | 4        |         | 0.00002                                 | 0.00860 | 3.06  | 0.10     | 2.97                  | 3.80                     | 5.62  | -0.34  | 0.00000                    | 0.00000 | 3.52  | 0.07     | 1.72                     | 4.17                  | 4.90  | 3.89  | 0.22    |        |   |   |   |   |   |   |   |   |   |   |
| RPneg_409.22256_6.594  | RP    | neg                                     | 6.594           | 409.2226   |            | no MS/MS | 4        |         | 0.00445                                 | 0.13465 | 1.12  | 0.14     | 1.12                  | 1.25                     | 2.88  | -0.24  | 0.00026                    | 0.02341 | 1.45  | 0.36     | 0.63                     | 1.22                  | 2.54  | 2.29  | 0.08    |        |   |   |   |   |   |   |   |   |   |   |
| RPneg_409.22263_6.855  | RP    | neg                                     | 6.855           | 409.2226   |            | no MS/MS | 4        |         | 0.00004                                 | 0.01118 | 1.50  | 0.12     | 1.41                  | 1.63                     | 2.87  | 0.37   | 0.00000                    | 0.00000 | 1.88  | 0.42     | 0.71                     | 1.18                  | 2.94  | 2.83  | 0.62    |        |   |   |   |   |   |   |   |   |   |   |
| RPneg_409.22281_7.743  | RP    | neg                                     | 7.743           | 409.2228   |            | no MS/MS | 4        |         | 0.00019                                 | 0.02619 | 1.70  | 0.18     | 2.13                  | 2.20                     | 2.87  | 0.12   | 0.00006                    | 0.00823 | 1.87  | -0.33    | 0.16                     | 2.60                  | 3.66  | 3.70  | 0.39    |        |   |   |   |   |   |   |   |   |   |   |
| RPneg_409.30688_10.482 | RP    | neg                                     | 10.482          | 409.3069   |            |          | 4        |         | 0.01650                                 | 0.23757 | 0.76  | 0.41     | 0.70                  | 0.63                     | 1.07  | 0.81   | 0.24911                    | 0.76555 | 0.70  | 0.24     | 0.48                     | 0.47                  | 0.64  | 0.04  | 0.74    |        |   |   |   |   |   |   |   |   |   |   |
| RPneg_409.3681_11.322  | RP    | neg                                     | 11.322          | 409.3681   |            |          | 4        |         | 0.19585                                 | 0.54092 | 0.16  | 0.04     | -0.21                 | 0.18                     | 0.62  | 0.22   | 0.38405                    | 0.84923 | -0.17 | -0.13    | -0.06                    | -0.19                 | 0.17  | -0.18 | -0.48   |        |   |   |   |   |   |   |   |   |   |   |
| RPneg_409.36829_11.778 | RP    | neg                                     | 11.778          | 409.3683   |            |          | 4        |         | 0.07111                                 | 0.38635 | 0.61  | 1.08     | 0.56                  | 0.61                     | 1.44  | 0.51   | 0.35136                    | 0.83176 | 0.16  | 0.17     | 0.74                     | -0.29                 | 0.19  | 0.35  | -0.15   |        |   |   |   |   |   |   |   |   |   |   |
| RPpos_409.7296_7.33    | RP    | pos                                     | 7.33            | 409.7296   |            |          | 4        |         | 0.74032                                 | 0.89561 | -0.08 | -0.40    | 0.31                  | -0.08                    | -0.08 | 0.70   | 0.99940                    | 0.99966 | -0.04 | 0.20     | 0.09                     | 0.09                  | -0.40 | -0.42 | -0.02   |        |   |   |   |   |   |   |   |   |   |   |
| RPpos_409.7534_12.62   | RP    | pos                                     | 12.62           | 409.7534   |            |          | 4        |         | 0.78525                                 | 0.91572 | -0.05 | 0.22     | 0.27                  | -0.09                    | 0.17  | 0.03   | 0.67067                    | 0.94557 | -0.11 | -0.21    | 0.08                     | 0.12                  | 0.00  | -0.16 | -0.26   |        |   |   |   |   |   |   |   |   |   |   |
| RPpos_409.755_12.51    | RP    | pos                                     | 12.51           | 409.7550   |            |          | 4        |         | 0.54285                                 | 0.79946 | 0.20  | 0.52     | 0.62                  | 0.14                     | 0.51  | -0.10  | 0.90274                    | 0.98582 | -0.04 | 0.01     | -0.34                    | 0.13                  | 0.18  | 0.17  | -0.4    |        |   |   |   |   |   |   |   |   |   |   |





| Feature_ID             | Mode  | Ionization | Average_Rt.min. | Average_Mz | Metabolite | MSMS | ID_Level | HMDB_ID | IV-Alcohol self-administration (IV-ASA) |         |       |       |       |       |          |       |         |                       |       |       |       | IV-Alcohol clamp (IV-AC)   |       |       |          |   |   |         |   |   |                       |   |   |   |                            |   |   |   |  |
|------------------------|-------|------------|-----------------|------------|------------|------|----------|---------|-----------------------------------------|---------|-------|-------|-------|-------|----------|-------|---------|-----------------------|-------|-------|-------|----------------------------|-------|-------|----------|---|---|---------|---|---|-----------------------|---|---|---|----------------------------|---|---|---|--|
|                        |       |            |                 |            |            |      |          |         | Area Under the Curve (AUC)              |         |       |       |       |       | Baseline |       |         | IV-Ghrelin or Placebo |       |       |       | Area Under the Curve (AUC) |       |       | Baseline |   |   | Post-LD |   |   | IV-Ghrelin or Placebo |   |   |   | Area Under the Curve (AUC) |   |   |   |  |
|                        |       |            |                 |            |            |      |          |         |                                         |         |       |       |       |       | p        | q     | d       | d                     | d     | d     | d     | d                          | d     | d     | p        | q | d | d       | d | d | d                     | d | d | d | d                          | d | d | d |  |
|                        |       |            |                 |            |            |      |          |         |                                         |         |       |       |       |       |          |       |         |                       |       |       |       |                            |       |       |          |   |   |         |   |   |                       |   |   |   |                            |   |   |   |  |
| RPpos_414.3013_9.31    | RP    | pos        | 9.31            | 414.3013   |            |      | 4        |         | 0.00058                                 | 0.04612 | 0.52  | 0.07  | 0.73  | 0.54  | 0.80     | 1.17  | 0.19462 | 0.70890               | 0.60  | -0.30 | 0.82  | 0.98                       | 0.61  | 0.83  | -0.47    |   |   |         |   |   |                       |   |   |   |                            |   |   |   |  |
| RPpos_414.3013_8.19    | RP    | pos        | 8.19            | 414.3013   |            |      | 4        |         | 0.07217                                 | 0.38890 | 0.32  | 0.00  | 0.98  | 0.36  | 0.45     | 0.31  | 0.17829 | 0.69310               | 0.22  | -0.21 | 0.37  | 0.39                       | 0.24  | 0.27  | -0.29    |   |   |         |   |   |                       |   |   |   |                            |   |   |   |  |
| RPneg_414.30188_11.176 | RP    | neg        | 11.176          | 414.3018   |            |      | 4        |         | 0.20529                                 | 0.54932 | 0.25  | 0.27  | 0.32  | 0.15  | 0.23     | 0.83  | 0.59750 | 0.92780               | -0.17 | -0.22 | -0.11 | -0.19                      | -0.18 | -0.18 | -0.18    |   |   |         |   |   |                       |   |   |   |                            |   |   |   |  |
| HILICpos_414.3064_0.44 | HILIC | pos        | 0.44            | 414.3064   |            |      | 4        |         | 0.26195                                 | 0.59447 | -0.24 | 0.05  | 0.31  | -0.08 | -0.07    | -0.27 | 0.75910 | 0.96233               | -0.14 | -0.06 | -0.11 | -0.19                      | -0.02 | -0.35 | 0.50     |   |   |         |   |   |                       |   |   |   |                            |   |   |   |  |
| RPneg_414.3226_10.381  | RP    | neg        | 10.381          | 414.3226   |            |      | 4        |         | 0.77971                                 | 0.92155 | -0.08 | -0.07 | -0.16 | 0.22  | 0.09     | -0.69 | 0.76900 | 0.96454               | -0.06 | -0.02 | 0.27  | -0.26                      | -0.19 | 0.03  | -0.03    |   |   |         |   |   |                       |   |   |   |                            |   |   |   |  |
| RPpos_414.3353_0.65    | RP    | pos        | 0.65            | 414.3353   |            |      | 4        |         | 0.38130                                 | 0.69515 | 0.13  | 0.16  | 0.81  | 0.61  | 0.17     | 0.44  | 0.51561 | 0.90792               | -0.14 | -0.04 | -0.26 | -0.21                      | -0.12 | -0.28 | -0.37    |   |   |         |   |   |                       |   |   |   |                            |   |   |   |  |
| RPpos_414.3364_6.51    | RP    | pos        | 6.51            | 414.3364   |            |      | 4        |         | 0.26691                                 | 0.60312 | 0.25  | 0.25  | 0.31  | 0.82  | 0.25     | 0.64  | 0.50701 | 0.90372               | -0.25 | -0.25 | -0.23 | -0.29                      | -0.19 | -0.21 | -0.26    |   |   |         |   |   |                       |   |   |   |                            |   |   |   |  |
| RPpos_414.7611_7.46    | RP    | pos        | 7.46            | 414.7611   |            |      | 4        |         | 0.42778                                 | 0.72875 | -0.23 | -0.23 | 0.36  | -0.12 | -0.35    | 0.46  | 0.88250 | 0.98281               | -0.01 | 0.01  | 0.14  | 0.20                       | -0.05 | -0.61 | -0.08    |   |   |         |   |   |                       |   |   |   |                            |   |   |   |  |
| HILICpos_414.7613_0.63 | HILIC | pos        | 0.63            | 414.7613   |            |      | 4        |         | 0.20126                                 | 0.54598 | -0.32 | -0.10 | 0.29  | 0.30  | -0.70    | 0.62  | 0.19939 | 0.71508               | -0.34 | -0.95 | -0.32 | -0.30                      | 0.28  | -0.18 | -0.28    |   |   |         |   |   |                       |   |   |   |                            |   |   |   |  |
| RPpos_414.7625_6.08    | RP    | pos        | 6.08            | 414.7625   |            |      | 4        |         | 0.34081                                 | 0.66312 | -0.30 | 0.05  | 0.79  | -0.32 | -0.28    | 0.18  | 0.59835 | 0.92780               | -0.15 | -0.20 | -0.11 | 0.16                       | 0.04  | -0.08 | -0.51    |   |   |         |   |   |                       |   |   |   |                            |   |   |   |  |
| RPpos_414.7733_12.87   | RP    | pos        | 12.87           | 414.7733   |            |      | 4        |         | 0.32646                                 | 0.65174 | -0.25 | 0.15  | 0.16  | -0.22 | -0.22    | -0.09 | 0.74085 | 0.95992               | -0.05 | -0.23 | -0.44 | 0.50                       | 0.01  | 0.11  | -0.23    |   |   |         |   |   |                       |   |   |   |                            |   |   |   |  |
| HILICneg_415.0532_1.99 | HILIC | neg        | 1.99            | 415.0532   |            |      | 4        |         | 0.00562                                 | 0.14718 | 0.55  | 0.56  | 0.60  | 0.57  | 0.52     | 1.14  | 0.72225 | 0.95590               | 0.12  | 0.03  | 0.13  | -0.01                      | 0.04  | 0.34  | 0.55     |   |   |         |   |   |                       |   |   |   |                            |   |   |   |  |
| HILICpos_415.0547_5.1  | HILIC | pos        | 5.1             | 415.0547   |            |      | 4        |         | 0.45887                                 | 0.75033 | 0.21  | 0.08  | 1.15  | 0.55  | 0.40     | -0.10 | 0.05286 | 0.45640               | 0.57  | -0.89 | 0.46  | 0.41                       | 1.74  | 0.19  | 1.33     |   |   |         |   |   |                       |   |   |   |                            |   |   |   |  |
| RPneg_415.09631_10.923 | RP    | neg        | 10.923          | 415.0963   |            |      | 4        |         | 0.04494                                 | 0.33540 | 0.58  | -0.06 | 0.48  | 0.66  | 1.16     | 0.02  | 0.98798 | 0.99810               | -0.10 | -0.32 | -0.01 | 0.02                       | -0.01 | -0.30 | -0.02    |   |   |         |   |   |                       |   |   |   |                            |   |   |   |  |
| RPneg_415.11447_11.194 | RP    | neg        | 11.194          | 415.1145   |            |      | 4        |         | 0.00225                                 | 0.09636 | 1.29  | 0.06  | 0.63  | 1.24  | 2.44     | -0.31 | 0.57747 | 0.92307               | -0.14 | -0.31 | 0.16  | -0.32                      | -0.05 | -0.18 | 0.01     |   |   |         |   |   |                       |   |   |   |                            |   |   |   |  |
| RPpos_415.1514_7.07    | RP    | pos        | 7.07            | 415.1514   |            |      | 4        |         | 0.06606                                 | 0.37817 | -0.32 | -0.22 | 0.61  | -0.11 | -0.57    | 0.17  | 0.74993 | 0.96166               | -0.23 | -0.25 | -0.06 | -0.54                      | 0.37  | -0.11 | -0.18    |   |   |         |   |   |                       |   |   |   |                            |   |   |   |  |
| RPneg_415.19382_7.308  | RP    | neg        | 7.308           | 415.1938   |            |      | 4        |         | 0.48076                                 | 0.76442 | 0.12  | 0.09  | 0.16  | 0.14  | 0.38     | 0.23  | 0.88568 | 0.98281               | -0.08 | -0.15 | 0.10  | -0.05                      | -0.19 | -0.06 | -0.19    |   |   |         |   |   |                       |   |   |   |                            |   |   |   |  |
| RPneg_415.1962_7.511   | RP    | neg        | 7.511           | 415.1962   |            |      | 4        |         | 0.18010                                 | 0.52555 | 0.30  | 0.10  | 0.36  | 0.49  | 0.70     | 0.30  | 0.40981 | 0.86241               | 0.11  | -0.30 | -0.24 | 0.27                       | 0.28  | 0.31  | 0.20     |   |   |         |   |   |                       |   |   |   |                            |   |   |   |  |
| HILICneg_415.1964_1.9  | HILIC | neg        | 1.9             | 415.1964   |            |      | 4        |         | 0.93008                                 | 0.97497 | 0.06  | 0.14  | 0.09  | 0.33  | 0.20     | -0.09 | 0.63466 | 0.93546               | -0.14 | -0.32 | 0.02  | -0.26                      | 0.07  | -0.03 | -0.03    |   |   |         |   |   |                       |   |   |   |                            |   |   |   |  |
| HILICpos_415.2112_0.4  | HILIC | pos        | 0.4             | 415.2112   |            |      | 4        |         | 0.53672                                 | 0.79698 | 0.18  | 0.65  | 0.08  | 0.07  | 0.30     | 0.31  | 0.02071 | 0.30441               | -0.60 | -0.48 | -0.09 | -0.39                      | 0.81  | 0.06  | -0.69    |   |   |         |   |   |                       |   |   |   |                            |   |   |   |  |
| RPpos_415.212_8.56     | RP    | pos        | 8.56            | 415.2120   |            |      | 4        |         | 0.73144                                 | 0.89098 | 0.10  | 0.88  | 0.09  | -0.08 | 0.23     | 0.31  | 0.22158 | 0.73822               | -0.28 | -0.20 | 0.79  | -0.17                      | -0.52 | -0.21 | -0.72    |   |   |         |   |   |                       |   |   |   |                            |   |   |   |  |
| RPneg_415.21326_9.538  | RP    | neg        | 9.538           | 415.2133   |            |      | 4        |         | 0.33961                                 | 0.66217 | 0.06  | 0.07  | 0.13  | 0.05  | 0.06     | 0.16  | 0.87453 | 0.98203               | -0.04 | -0.05 | -0.03 | -0.05                      | 0.02  | -0.08 | -0.08    |   |   |         |   |   |                       |   |   |   |                            |   |   |   |  |
| RPneg_415.21457_7.726  | RP    | neg        | 7.726           | 415.2146   |            |      | 4        |         | 0.02686                                 | 0.28244 | 0.72  | 0.56  | 0.78  | 0.58  | 0.84     | 1.15  | 0.23808 | 0.75634               | -0.34 | -0.38 | -0.35 | -0.36                      | -0.34 | -0.30 | -0.33    |   |   |         |   |   |                       |   |   |   |                            |   |   |   |  |
| RPneg_415.21466_8.19   | RP    | neg        | 8.19            | 415.2147   |            |      | 4        |         | 0.89594                                 | 0.96217 | 0.03  | 0.09  | 0.16  | -0.04 | 0.21     | 0.04  | 0.72291 | 0.95590               | 0.01  | 0.00  | 0.10  | -0.16                      | 0.14  | -0.05 | 0.08     |   |   |         |   |   |                       |   |   |   |                            |   |   |   |  |
| RPneg_415.21588_8.401  | RP    | neg        | 8.401           | 415.2159   |            |      | 4        |         | 0.00187                                 | 0.08702 | 0.29  | 0.15  | 0.60  | 0.40  | 0.52     | -0.05 | 0.90838 | 0.98698               | -0.03 | -0.22 | -0.03 | 0.01                       | 0.08  | 0.04  | -0.18    |   |   |         |   |   |                       |   |   |   |                            |   |   |   |  |
| RPneg_415.21637_8.591  | RP    | neg        | 8.591           | 415.2164   |            |      | 4        |         | 0.00116                                 | 0.06905 | 0.58  | 0.42  | 0.97  | 0.66  | 0.70     | 0.37  | 0.35926 | 0.83448               | 0.08  | -0.05 | 0.09  | 0.10                       | 0.17  | 0.09  | -0.03    |   |   |         |   |   |                       |   |   |   |                            |   |   |   |  |
| RPneg_415.23254_9.571  | RP    | neg        | 9.571           | 415.2325   |            |      | 4        |         | 0.78643                                 | 0.91612 | -0.07 | 0.27  | 0.25  | -0.11 | 0.25     | 0.02  | 0.99472 | 0.99920               | 0.00  | -0.03 | 0.85  | -0.27                      | 0.27  | -0.36 | 0.38     |   |   |         |   |   |                       |   |   |   |                            |   |   |   |  |
| HILICneg_415.2336_0.39 | HILIC | neg        | 0.39            | 415.2336   |            |      | 4        |         | 0.44293                                 | 0.73893 | 0.22  | 0.04  | 0.54  | 0.11  | 1.11     | -0.26 | 0.82583 | 0.97408               | -0.10 | -0.06 | -0.08 | -0.18                      | -0.04 | -0.37 | 0.52     |   |   |         |   |   |                       |   |   |   |                            |   |   |   |  |
| RPneg_415.2341_6.647   | RP    | neg        | 6.647           | 415.2341   |            |      | 4        |         | 0.36480                                 | 0.68237 | -0.03 | 0.01  | 0.01  | -0.02 | -0.03    | 0.46  | 0.05351 | 0.45847               | -0.05 | 0.04  | -0.07 | -0.08                      | -0.09 | -0.04 | -0.05    |   |   |         |   |   |                       |   |   |   |                            |   |   |   |  |
| RPpos_415.2372_10.78   | RP    | pos        | 10.78           | 415.2372   |            |      | 4        |         | 0.88680                                 | 0.95850 | -0.04 | 0.43  | 0.43  | 0.86  | 0.40     | -0.28 | 0.15585 | 0.66228               | 0.10  | 0.41  | 0.17  | 0.13                       | 0.06  | 0.32  | 0.03     |   |   |         |   |   |                       |   |   |   |                            |   |   |   |  |
| RPpos_415.2538_4.54    | RP    | pos        | 4.54            | 415.2538   |            |      | 4        |         | 0.44130                                 | 0.73821 | -0.24 | -0.03 | 0.87  | -0.21 | -0.21    | 0.09  | 0.00112 | 0.06122               | -0.66 | -0.27 | -0.33 | -0.60                      | -0.10 | -0.24 | -0.57    |   |   |         |   |   |                       |   |   |   |                            |   |   |   |  |
| RPpos_415.254_4.38     | RP    | pos        | 4.38            | 415.2540   |            |      | 4        |         | 0.18132                                 | 0.52707 | -0.39 | -0.18 | 0.37  | 0.09  | -0.34    | 0.07  | 0.23447 | 0.76898               | -0.29 | -0.33 | -0.13 | -0.34                      | -0.03 | -0.10 | -0.50    |   |   |         |   |   |                       |   |   |   |                            |   |   |   |  |
| RPpos_415.2543_6.6     | RP    | pos        | 6.6             | 415.2543   |            |      | 4        |         | 0.57497                                 | 0.81611 | -0.16 | -0.31 | 0.38  | -0.12 | -0.17    | 0.34  | 0.98950 | 0.99810               | -0.02 | 0.02  | 0.09  | 0.17                       | -0.02 | -0.68 | -0.10    |   |   |         |   |   |                       |   |   |   |                            |   |   |   |  |
| RPpos_415.2684_7.49    | RP    | pos        | 7.49            | 415.2684   |            |      | 4        |         | 0.54431                                 | 0.80046 | -0.20 | 0.11  | 0.99  | -0.27 | -0.26    | 0.64  | 0.20684 | 0.73261               | -0.36 | -0.27 | -0.10 | -0.32                      | -0.11 | -0.44 | -0.42    |   |   |         |   |   |                       |   |   |   |                            |   |   |   |  |
| HILICpos_415.2693_0.51 | HILIC | pos        | 0.51            | 415.2693   |            |      | 4        |         | 0.14554                                 | 0.48636 | -0.44 | -0.28 | 0.82  | -0.43 | -0.82    | 0.23  | 0.82805 |                       |       |       |       |                            |       |       |          |   |   |         |   |   |                       |   |   |   |                            |   |   |   |  |



| Feature_ID              | Mode | Ionization | Average.Rt.min. | Average.Mz | Metabolite | MSMS | ID_Level | HMDB_ID | IV-Alcohol self-administration (IV-ASA) |         |       |       |       |                       |       |       |         |         |        |       |       |       |       | IV-Alcohol clamp (IV-AC)   |         |         |         |       |                       |       |       |       |         |         |         |       |       |       |       |       |       |       |         |         |         |       |       |       |       |       |         |         |         |       |       |       |       |       |       |       |
|-------------------------|------|------------|-----------------|------------|------------|------|----------|---------|-----------------------------------------|---------|-------|-------|-------|-----------------------|-------|-------|---------|---------|--------|-------|-------|-------|-------|----------------------------|---------|---------|---------|-------|-----------------------|-------|-------|-------|---------|---------|---------|-------|-------|-------|-------|-------|-------|-------|---------|---------|---------|-------|-------|-------|-------|-------|---------|---------|---------|-------|-------|-------|-------|-------|-------|-------|
|                         |      |            |                 |            |            |      |          |         | Area Under the Curve (AUC)              |         |       |       |       | IV-Ghrelin or Placebo |       |       |         |         | BrAC=0 |       |       |       |       | Area Under the Curve (AUC) |         |         |         |       | IV-Ghrelin or Placebo |       |       |       |         | BrAC=0  |         |       |       |       |       |       |       |       |         |         |         |       |       |       |       |       |         |         |         |       |       |       |       |       |       |       |
|                         |      |            |                 |            |            |      |          |         | p                                       | q       | d     | d     | d     | d                     | d     | d     | d       | d       | d      | d     | d     | d     | d     | p                          | q       | d       | d       | d     | d                     | d     | d     | d     | d       | d       | d       | d     | d     | d     |       |       |       |       |         |         |         |       |       |       |       |       |         |         |         |       |       |       |       |       |       |       |
| HILICpos_421.2226_0.47  |      | pos        | 0.47            |            |            |      | 4        |         | 0.74138                                 | 0.89645 | -0.14 | -0.37 | 0.51  | -0.06                 | -0.23 | 0.34  | 0.82199 | 0.97319 | 0.06   | -0.39 | 0.05  | 0.11  | 0.38  | 0.20                       | -0.29   | 0.46990 | 0.75709 | -0.22 | -0.31                 | 0.91  | -0.12 | -0.15 | 0.28    | 0.40281 | 0.85869 | -0.31 | -0.21 | -0.09 | -0.25 | -0.02 | -0.52 | -0.51 | 0.56842 | 0.81331 | -0.16   | -0.24 | 0.51  | -0.10 | -0.31 | 0.56  | 0.98674 | 0.99797 | -0.05   | 0.06  | 0.17  | 0.11  | -0.09 | -0.69 | -0.20 |       |
| RPpos_421.2275_7.05     |      | pos        | 7.05            |            |            |      | 4        |         | 0.94918                                 | 0.98121 | -0.04 | 0.33  | 0.36  | 0.37                  | -0.09 | 1.01  | 0.98183 | 0.99752 | -0.04  | 0.01  | 0.11  | 0.03  | 0.14  | -0.62                      | -0.31   | 0.00061 | 0.05719 | 0.54  | 0.89                  | 1.80  | 1.94  | 1.16  | 2.32    | 0.18735 | 0.70226 | 0.62  | 0.14  | 0.10  | 0.82  | 0.99  | 0.59  | 0.67  | 0.03    | 0.05886 | 0.36899 | 0.45  | -0.05 | 0.34  | 0.59  | -0.09 | 0.27    | 0.26323 | 0.17344 | -0.15 | -0.01 | -0.23 | 0.12  | 0.12  | 0.02  | -0.08 |
| RPneg_421.29529_10.324  |      | neg        | 10.324          |            |            |      | 4        |         | 0.85029                                 | 0.94370 | 0.04  | -0.23 | 0.66  | 0.09                  | 0.23  | 0.15  | 0.09721 | 0.56769 | 0.28   | 0.09  | 0.48  | 0.64  | 0.49  | -0.22                      | -0.44   | 0.12205 | 0.45740 | 0.51  | 0.05                  | 0.40  | 0.69  | 1.29  | -0.36   | 0.20269 | 0.71882 | -0.18 | -0.64 | 0.00  | 0.36  | -0.07 | -0.08 | -0.09 |         |         |         |       |       |       |       |       |         |         |         |       |       |       |       |       |       |       |
| RPneg_422.1272_6.353    |      | neg        | 6.353           |            |            |      | 4        |         | 0.35926                                 | 0.67782 | -0.22 | -0.10 | 0.02  | -0.13                 | -0.05 | -0.55 | 0.01090 | 0.22207 | 2.14   | 2.14  | 2.31  | 2.22  | 2.12  | 1.75                       | 1.61    | 0.06612 | 0.37830 | 0.62  | 0.18                  | 0.23  | 0.11  | 2.07  | 0.37    | 0.64932 | 0.93916 | 0.14  | -0.12 | 1.30  | -0.20 | -0.16 | 0.32  | 0.21  |         |         |         |       |       |       |       |       |         |         |         |       |       |       |       |       |       |       |
| RPneg_422.13126_10.873  |      | neg        | 10.873          |            |            |      | 4        |         | 0.00042                                 | 0.03749 | 1.44  | -0.10 | 0.67  | 0.85                  | 2.64  | -0.04 | 0.95374 | 0.99401 | -0.05  | 0.04  | 0.36  | -0.19 | -0.09 | -0.15                      | -0.09   | 0.99149 | 0.99721 | -0.01 | 1.92                  | 1.14  | 0.01  | -0.25 | 0.40    | 0.04695 | 0.43342 | -0.30 | -0.34 | 0.03  | -0.16 | 0.19  | -0.34 | -0.47 |         |         |         |       |       |       |       |       |         |         |         |       |       |       |       |       |       |       |
| RPneg_422.13962_10.665  |      | neg        | 10.665          |            |            |      | 4        |         | 0.00040                                 | 0.03646 | 0.53  | 0.18  | 0.45  | 0.69                  | 1.35  | -0.50 | 0.07021 | 0.50745 | 0.48   | -0.04 | -0.02 | 0.35  | 0.88  | 1.08                       | -0.16   | 0.50414 | 0.77877 | -0.24 | 0.44                  | 0.19  | 0.04  | 0.45  | -0.19   | 0.40214 | 0.85869 | -0.20 | 0.94  | -0.04 | 0.23  | -0.08 | -0.69 | -0.75 |         |         |         |       |       |       |       |       |         |         |         |       |       |       |       |       |       |       |
| RPneg_422.15198_14.171  |      | neg        | 14.171          |            |            |      | 4        |         | 0.78728                                 | 0.91650 | 0.06  | 0.41  | 1.08  | -0.17                 | 0.42  | -0.25 | 0.61798 | 0.93244 | 0.06   | 0.84  | -0.09 | 0.09  | 0.36  | -0.37                      | -0.40   | 0.90899 | 0.96628 | 0.03  | 0.17                  | 0.43  | -0.12 | 0.31  | -0.11   | 0.00006 | 0.00880 | 0.52  | 0.36  | 0.36  | 0.57  | 0.59  | 0.57  | -0.18 |         |         |         |       |       |       |       |       |         |         |         |       |       |       |       |       |       |       |
| RPneg_422.18109_6.658   |      | neg        | 6.658           |            |            |      | 4        |         | 0.92400                                 | 0.97276 | 0.04  | 0.01  | 0.60  | 0.61                  | 0.21  | 0.09  | 0.01356 | 0.24890 | 0.80   | 0.66  | 1.35  | 0.29  | 0.92  | 0.00                       | -0.35   | 0.00042 | 0.03749 | 1.44  | -0.10                 | 0.67  | 0.85  | 2.64  | -0.04   | 0.95374 | 0.99401 | -0.05 | 0.04  | 0.36  | -0.19 | -0.09 | -0.15 | -0.09 |         |         |         |       |       |       |       |       |         |         |         |       |       |       |       |       |       |       |
| RPneg_422.18189_6.658   |      | neg        | 6.658           |            |            |      | 4        |         | 0.70559                                 | 0.87968 | -0.15 | 0.01  | 1.04  | -0.17                 | -0.07 | 0.73  | 0.27574 | 0.78622 | -0.32  | -0.35 | -0.09 | -0.23 | -0.06 | -0.39                      | -0.41   | 0.99149 | 0.99721 | -0.01 | 1.92                  | 1.14  | 0.01  | -0.25 | 0.40    | 0.04695 | 0.43342 | -0.30 | -0.34 | 0.03  | -0.16 | 0.19  | -0.34 | -0.47 |         |         |         |       |       |       |       |       |         |         |         |       |       |       |       |       |       |       |
| RPpos_422.1842_7.45     |      | pos        | 7.45            |            |            |      | 4        |         | 0.46284                                 | 0.75269 | -0.24 | -0.15 | 0.09  | -0.10                 | -0.16 | 0.86  | 0.45197 | 0.88294 | -0.33  | -0.14 | 0.10  | -0.37 | -0.27 | -0.36                      | 0.00040 | 0.03646 | 0.53    | 0.18  | 0.45                  | 0.69  | 1.35  | -0.50 | 0.07021 | 0.50745 | 0.48    | -0.04 | -0.02 | 0.35  | 0.88  | 1.08  | -0.16 |       |         |         |         |       |       |       |       |       |         |         |         |       |       |       |       |       |       |       |
| HILICpos_422.2024_1.37  |      | pos        | 1.37            |            |            |      | 4        |         | 0.50414                                 | 0.77877 | -0.24 | 0.44  | 0.19  | 0.04                  | 0.45  | -0.19 | 0.40214 | 0.85869 | -0.20  | 0.94  | -0.04 | 0.23  | -0.08 | -0.69                      | -0.75   | 0.78728 | 0.91650 | 0.06  | 0.41                  | 1.08  | -0.17 | 0.42  | -0.25   | 0.61798 | 0.93244 | 0.06  | 0.84  | -0.09 | 0.09  | 0.36  | -0.37 | -0.40 |         |         |         |       |       |       |       |       |         |         |         |       |       |       |       |       |       |       |
| HILICneg_422.2185_4.33  |      | neg        | 4.33            |            |            |      | 4        |         | 0.90899                                 | 0.96628 | 0.03  | 0.17  | 0.43  | -0.12                 | 0.31  | -0.11 | 0.00006 | 0.00880 | 0.52   | 0.36  | 0.36  | 0.57  | 0.59  | 0.57                       | -0.18   | 0.92400 | 0.97276 | 0.04  | 0.01                  | 0.60  | 0.61  | 0.21  | 0.09    | 0.01356 | 0.24890 | 0.80  | 0.66  | 1.35  | 0.29  | 0.92  | 0.00  | -0.35 |         |         |         |       |       |       |       |       |         |         |         |       |       |       |       |       |       |       |
| HILICpos_422.2382_1.34  |      | pos        | 1.34            |            |            |      | 4        |         | 0.70559                                 | 0.87968 | -0.15 | 0.01  | 1.04  | -0.17                 | -0.07 | 0.73  | 0.27574 | 0.78622 | -0.32  | -0.35 | -0.09 | -0.23 | -0.06 | -0.39                      | -0.41   | 0.00042 | 0.03749 | 1.44  | -0.10                 | 0.67  | 0.85  | 2.64  | -0.04   | 0.95374 | 0.99401 | -0.05 | 0.04  | 0.36  | -0.19 | -0.09 | -0.15 | -0.09 |         |         |         |       |       |       |       |       |         |         |         |       |       |       |       |       |       |       |
| RPpos_422.2774_7.49     |      | pos        | 7.49            |            |            |      | 4        |         | 0.46284                                 | 0.75269 | -0.24 | -0.15 | 0.09  | -0.10                 | -0.16 | 0.86  | 0.45197 | 0.88294 | -0.33  | -0.14 | 0.10  | -0.37 | -0.27 | -0.36                      | 0.99149 | 0.99721 | -0.01   | 1.92  | 1.14                  | 0.01  | -0.25 | 0.40  | 0.04695 | 0.43342 | -0.30   | -0.34 | 0.03  | -0.16 | 0.19  | -0.34 | -0.47 |       |         |         |         |       |       |       |       |       |         |         |         |       |       |       |       |       |       |       |
| RPpos_422.2858_7.32     |      | pos        | 7.32            |            |            |      | 4        |         | 0.46093                                 | 0.75153 | 0.23  | 0.52  | 0.72  | 0.17                  | 0.48  | 0.22  | 0.01045 | 0.21743 | -1.25  | -0.80 | 0.15  | -0.87 | -0.34 | -0.24                      | -0.52   | 0.00040 | 0.03646 | 0.53  | 0.18                  | 0.45  | 0.69  | 1.35  | -0.50   | 0.07021 | 0.50745 | 0.48  | -0.04 | -0.02 | 0.35  | 0.88  | 1.08  | -0.16 |         |         |         |       |       |       |       |       |         |         |         |       |       |       |       |       |       |       |
| RPpos_422.2907_6.63     |      | pos        | 6.63            |            |            |      | 4        |         | 0.67937                                 | 0.86674 | -0.13 | 0.19  | 0.12  | 0.04                  | 0.06  | -0.85 | 0.99787 | 0.99953 | 0.04   | 0.57  | -0.09 | 0.16  | -0.32 | 0.09                       | 0.05    | 0.00042 | 0.03749 | 1.44  | -0.10                 | 0.67  | 0.85  | 2.64  | -0.04   | 0.95374 | 0.99401 | -0.05 | 0.04  | 0.36  | -0.19 | -0.09 | -0.15 | -0.09 |         |         |         |       |       |       |       |       |         |         |         |       |       |       |       |       |       |       |
| RPpos_422.2946_11.58    |      | pos        | 11.58           |            |            |      | 4        |         | 0.98800                                 | 0.99522 | 0.00  | -0.12 | 0.26  | -0.20                 | 0.41  | 0.32  | 0.06456 | 0.49288 | 0.33   | 0.12  | 0.35  | 0.72  | -0.08 | -0.01                      | 0.30    | 0.00042 | 0.03749 | 1.44  | -0.10                 | 0.67  | 0.85  | 2.64  | -0.04   | 0.95374 | 0.99401 | -0.05 | 0.04  | 0.36  | -0.19 | -0.09 | -0.15 | -0.09 |         |         |         |       |       |       |       |       |         |         |         |       |       |       |       |       |       |       |
| HILICpos_422.325_0.62   |      | pos        | 0.62            |            |            |      | 4        |         | 0.97922                                 | 0.99201 | 0.03  | 0.15  | 0.02  | 0.53                  | 0.62  | -0.30 | 0.22135 | 0.73820 | 0.11   | 0.16  | -0.05 | 0.05  | 0.10  | 0.39                       | -0.06   | 0.69242 | 0.87364 | -0.06 | -0.08                 | 0.24  | -0.17 | 0.29  | 0.40    | 0.01602 | 0.27117 | 0.48  | 0.15  | 0.56  | 0.65  | 0.28  | 0.29  | 0.10  |         |         |         |       |       |       |       |       |         |         |         |       |       |       |       |       |       |       |
| RPpos_422.3258_8.9      |      | pos        | 8.9             |            |            |      | 4        |         | 0.21399                                 | 0.55644 | -0.33 | 0.08  | 0.04  | -0.53                 | 0.05  | -0.14 | 0.36514 | 0.83811 | -0.22  | -0.21 | -0.19 | -0.16 | -0.16 | -0.24                      | -0.30   | 0.21399 | 0.55644 | -0.33 | 0.08                  | 0.04  | -0.53 | 0.05  | -0.14   | 0.36514 | 0.83811 | -0.22 | -0.21 | -0.19 | -0.16 | -0.16 | -0.24 | -0.30 |         |         |         |       |       |       |       |       |         |         |         |       |       |       |       |       |       |       |
| RPpos_422.3258_8.9      |      | pos        | 8.9             |            |            |      | 4        |         | 0.49950                                 | 0.77605 | -0.25 | 0.26  | 0.05  | -0.06                 | 0.26  | -0.50 | 0.77352 | 0.96458 | 0.10   | -0.08 | 0.29  | 0.13  | 0.06  | 0.04                       | 0.06    | 0.49950 | 0.77605 | -0.25 | 0.26                  | 0.05  | -0.06 | 0.26  | -0.50   | 0.77352 | 0.96458 | 0.10  | -0.08 | 0.29  | 0.13  | 0.06  | 0.04  | 0.06  |         |         |         |       |       |       |       |       |         |         |         |       |       |       |       |       |       |       |
| RPpos_422.7618_12.87    |      | pos        | 12.87           |            |            |      | 4        |         | 0.89198                                 | 0.96066 | -0.05 | 0.09  | 0.33  | 0.08                  | 0.21  | 0.70  | 0.19194 | 0.70754 | -0.03  | -0.39 | -0.12 | 0.14  | 0.03  | 0.29                       | -0.78   | 0.89198 | 0.96066 | -0.05 | 0.09                  | 0.33  | 0.08  | 0.21  | 0.70    | 0.19194 | 0.70754 | -0.03 | -0.39 | -0.12 | 0.14  | 0.03  | 0.29  | -0.78 |         |         |         |       |       |       |       |       |         |         |         |       |       |       |       |       |       |       |
| RPpos_422.7624_12.65    |      | pos        | 12.65           |            |            |      | 4        |         | 0.61453                                 | 0.83575 | -0.07 | -0.17 | 0.03  | 0.00                  | 0.24  | -0.24 | 0.19118 | 0.70643 | 0.40   | 0.17  | 0.48  | 0.70  | 0.43  | 0.33                       | -0.35   | 0.61453 | 0.83575 | -0.07 | -0.17                 | 0.03  | 0.00  | 0.24  | -0.24   | 0.19118 | 0.70643 | 0.40  | 0.17  | 0.48  | 0.70  | 0.43  | 0.33  | -0.35 |         |         |         |       |       |       |       |       |         |         |         |       |       |       |       |       |       |       |
| HILICneg_422.9519_5.41  |      | neg        | 5.41            |            |            |      | 4        |         | 0.05441                                 | 0.35528 | -0.38 | 0.19  | 0.31  | 0.08                  | -0.75 | -0.62 | 0.08970 | 0.55338 | -0.66  | 0.00  | -1.08 | -0.12 | -0.68 | -0.74                      | -0.13   | 0.05441 | 0.35528 | -0.38 | 0.19                  | 0.31  | 0.08  | -0.75 | -0.62   | 0.08970 | 0.55338 | -0.66 | 0.00  | -1.08 | -0.12 | -0.68 | -0.74 | -0.13 |         |         |         |       |       |       |       |       |         |         |         |       |       |       |       |       |       |       |
| HILICpos_423.0288_6.785 |      | pos        | 6.785           |            |            |      | 4        |         | 0.89619                                 | 0.96218 | -0.01 | -0.04 | 0.06  | -0.07                 | 0.30  | -0.16 | 0.19046 | 0.70588 | 0.23   | -0.07 | 0.22  | 0.38  | 0.20  | 0.39                       | 0.35    | 0.89619 | 0.96218 | -0.01 | -0.04                 | 0.06  | -0.07 | 0.30  | -0.16   | 0.19046 | 0.70588 | 0.23  | -0.07 | 0.22  | 0.38  | 0.20  | 0.39  | 0.35  |         |         |         |       |       |       |       |       |         |         |         |       |       |       |       |       |       |       |
| HILICneg_423.0195_4.21  |      | neg        | 4.21            |            |            |      | 4        |         | 0.17624                                 | 0.52172 | -0.45 | -0.02 | 0.25  | -0.24                 | 0.20  | 0.08  | 0.33886 | 0.82264 | -0.15  | 0.17  | -0.11 | -0.22 | -0.01 | -0.68                      | -0.43   | 0.17624 | 0.52172 | -0.45 | -0.02                 | 0.25  | -0.24 | 0.20  | 0.08    | 0.33886 | 0.82264 | -0.15 | 0.17  | -0.11 | -0.22 | -0.01 | -0.68 | -0.43 |         |         |         |       |       |       |       |       |         |         |         |       |       |       |       |       |       |       |
| RPneg_423.039_6.111     |      | neg        | 6.111           |            |            |      | 4        |         | 0.23035                                 | 0.57184 | -0.40 | 0.42  | 0.50  | -0.08                 | -0.08 | -0.21 | 0.70486 | 0.95242 | -0.13  | 0.36  | -0.04 | 0.13  | 0.23  | -0.60                      | -0.88   | 0.23035 | 0.57184 | -0.40 | 0.42                  | 0.50  | -0.08 | -0.08 | -0.21   | 0.70486 | 0.95242 | -0.13 | 0.36  | -0.04 | 0.13  | 0.23  | -0.60 | -0.88 |         |         |         |       |       |       |       |       |         |         |         |       |       |       |       |       |       |       |
| RPneg_423.10223_7.607   |      | neg        | 7.607           |            |            |      | 4        |         | 0.26902                                 | 0.60509 | 0.42  | 0.64  | 0.60  | 0.39                  | 0.52  | -0.23 | 0.38014 | 0.84666 | 0.80   | 0.83  | 1.12  | 0.85  | 0.44  | 0.44                       | 0.24    | 0.26902 | 0.60509 | 0.42  | 0.64                  | 0.60  | 0.39  | 0.52  | -0.23   | 0.38014 | 0.84666 | 0.80  | 0.83  | 1.12  | 0.85  | 0.44  | 0.44  | 0.24  |         |         |         |       |       |       |       |       |         |         |         |       |       |       |       |       |       |       |
| RPneg_423.10274_7.467   |      | neg        | 7.467           |            |            |      | 4        |         | 0.96995                                 | 0.98857 | -0.03 | 0.03  | -0.05 | 0.06                  | 0.05  | -0.12 | 0.70445 | 0.95228 | -0.09  | -0.11 | -0.06 | -0.04 | -0.12 | -0.10                      | -0.18   | 0.96995 | 0.98857 | -0.03 | 0.03                  | -0.05 | 0.06  | 0.05  | -0.12   | 0.70445 | 0.95228 | -0.09 | -0.11 | -0.06 | -0.04 | -0.12 | -0.10 | -0.18 |         |         |         |       |       |       |       |       |         |         |         |       |       |       |       |       |       |       |
| RPneg_423.12067_7.279   |      | neg        | 7.279           |            |            |      | 4        |         | 0.31185                                 | 0.63989 | 0.32  | 0.06  | 0.61  | 0.45                  | 0.66  | 0.23  | 0.95349 | 0.99401 | 0.00   | -0.10 | 0.01  | 0.07  | 0.32  | 0.17                       | -0.20   | 0.31185 | 0.63989 | 0.32  | 0.06                  | 0.61  | 0.45  | 0.66  | 0.23    | 0.95349 | 0.9940  |       |       |       |       |       |       |       |         |         |         |       |       |       |       |       |         |         |         |       |       |       |       |       |       |       |



| Feature_ID             | Mode  | Ionization | Average_Rt.min. | Average_Mz | Metabolite | MSMS    | ID_Level | HMDB_ID | IV-Alcohol self-administration (IV-ASA) |         |        |       |        |                       |       |                       |         |         | IV-Alcohol clamp (IV-AC)   |       |       |       |         |                       |       |       |   |         |        |
|------------------------|-------|------------|-----------------|------------|------------|---------|----------|---------|-----------------------------------------|---------|--------|-------|--------|-----------------------|-------|-----------------------|---------|---------|----------------------------|-------|-------|-------|---------|-----------------------|-------|-------|---|---------|--------|
|                        |       |            |                 |            |            |         |          |         | Area Under the Curve (AUC)              |         |        |       |        | IV-Ghrelin or Placebo |       |                       |         |         | Area Under the Curve (AUC) |       |       |       |         | IV-Ghrelin or Placebo |       |       |   |         |        |
|                        |       |            |                 |            |            |         |          |         | Baseline                                |         | IV-ASA |       | BrAC=0 | Baseline              |       | IV-Ghrelin or Placebo |         | BrAC=0  | Baseline                   |       | IV-AC |       | Post-AC | Baseline              |       | IV-AC |   | Post-AC | BrAC=0 |
|                        |       |            |                 |            |            |         |          |         | p                                       | q       | d      | d     | d      | d                     | d     | d                     | d       | d       | d                          | p     | q     | d     | d       | d                     | p     | q     | d | d       | d      |
| RPneg_425.36469_11.319 | RP    | neg        | 11.319          | 425.3647   |            |         | 4        |         | 0.61719                                 | 0.83727 | 0.06   | 0.06  | -0.02  | 0.29                  | 0.29  | 0.20                  | 0.14220 | 0.64464 | -0.25                      | -0.30 | -0.29 | -0.23 | -0.21   | -0.21                 | 0.01  |       |   |         |        |
| RPpos_425.447_12.06    | RP    | pos        | 12.06           | 425.4470   |            |         | 4        |         | 0.86847                                 | 0.95065 | 0.06   | 0.46  | 0.14   | 0.14                  | 0.11  | -0.68                 | 0.40230 | 0.85869 | -0.02                      | 0.81  | -0.02 | 0.08  | -0.54   | 0.05                  | -0.02 |       |   |         |        |
| RPpos_425.7532_6.08    | RP    | pos        | 6.08            | 425.7532   |            |         | 4        |         | 0.62120                                 | 0.83908 | -0.18  | 0.03  | 0.89   | -0.19                 | -0.09 | 0.37                  | 0.60739 | 0.92943 | -0.12                      | -0.13 | -0.13 | 0.15  | -0.09   | -0.07                 | -0.34 |       |   |         |        |
| HILICpos_425.9878_7.36 | HILIC | pos        | 7.36            | 425.9878   |            |         | 4        |         | 0.62298                                 | 0.83999 | -0.20  | 0.35  | 0.13   | -0.43                 | 0.01  | 0.63                  | 0.95506 | 0.99428 | 0.04                       | 1.20  | 0.03  | 0.07  | -0.19   | 0.06                  | -0.19 |       |   |         |        |
| RPneg_426.15933_6.756  | RP    | neg        | 6.756           | 426.1593   |            |         | 4        |         | 0.10486                                 | 0.43784 | -0.26  | -0.23 | -0.07  | -0.18                 | -0.14 | -0.16                 | 0.00199 | 0.08652 | 1.33                       | 1.31  | 1.52  | 1.15  | 1.37    | 1.16                  | 1.48  |       |   |         |        |
| RPneg_426.16064_6.864  | RP    | neg        | 6.864           | 426.1606   |            |         | 4        |         | 0.19218                                 | 0.53754 | -0.04  | -0.09 | 0.17   | -0.25                 | -0.45 | -0.45                 | 0.05648 | 0.49811 | 0.69                       | 0.68  | 0.77  | 0.68  | 0.67    | 0.62                  | 0.42  |       |   |         |        |
| RPneg_426.17126_11.193 | RP    | neg        | 11.193          | 426.1713   |            |         | 4        |         | 0.00334                                 | 0.11913 | 1.17   | -0.01 | 0.59   | 1.30                  | 2.57  | -0.46                 | 0.86867 | 0.98025 | -0.05                      | -0.17 | 0.30  | -0.23 | -0.03   | -0.15                 | 0.01  |       |   |         |        |
| RPneg_426.20837_11.787 | RP    | neg        | 11.787          | 426.2084   |            |         | 4        |         | 0.04754                                 | 0.34084 | -0.25  | -0.20 | -0.17  | 0.24                  | -0.18 | -0.04                 | 0.90256 | 0.98582 | 0.02                       | 0.09  | -0.49 | -0.13 | 0.35    | 0.17                  | 0.88  |       |   |         |        |
| RPneg_426.21262_7.742  | RP    | neg        | 7.742           | 426.2126   |            | no MSMS | 4        |         | 0.00006                                 | 0.01371 | 1.81   | 0.19  | 2.35   | 1.98                  | 2.90  | 0.11                  | 0.00019 | 0.01968 | 1.45                       | -0.16 | 0.12  | 1.93  | 2.73    | 2.51                  | 0.73  |       |   |         |        |
| RPpos_426.2643_7.13    | RP    | pos        | 7.13            | 426.2643   |            |         | 4        |         | 0.61404                                 | 0.83555 | -0.12  | 0.44  | 0.35   | 0.14                  | -0.22 | 0.84                  | 0.81526 | 0.97182 | 0.04                       | -0.14 | 0.17  | 0.06  | 0.41    | -0.57                 | -0.21 |       |   |         |        |
| RPneg_426.26508_9.105  | RP    | neg        | 9.105           | 426.2651   |            |         | 4        |         | 0.36416                                 | 0.68205 | 0.14   | 0.07  | 0.27   | 0.22                  | 0.39  | 0.23                  | 0.63678 | 0.93602 | 0.31                       | 0.07  | 0.41  | 0.47  | 0.27    | 0.31                  | 0.04  |       |   |         |        |
| RPneg_426.26541_8.961  | RP    | neg        | 8.961           | 426.2654   |            |         | 4        |         | 0.77485                                 | 0.91117 | 0.07   | 0.00  | 0.33   | 0.32                  | 0.15  | 0.16                  | 0.03271 | 0.37228 | 0.87                       | -0.03 | 1.07  | 0.90  | 0.20    | 1.20                  | -0.28 |       |   |         |        |
| RPneg_426.30069_10.846 | RP    | neg        | 10.846          | 426.3007   |            |         | 4        |         | 0.80502                                 | 0.92503 | 0.05   | -0.20 | 0.24   | -0.06                 | 0.48  | -0.18                 | 0.00000 | 0.00013 | 0.99                       | 0.47  | 0.62  | 0.99  | 1.20    | 1.43                  | 0.61  |       |   |         |        |
| HILICpos_426.3056_0.41 | HILIC | pos        | 0.41            | 426.3056   |            |         | 4        |         | 0.81803                                 | 0.93068 | -0.02  | 0.19  | 0.29   | 0.11                  | 0.19  | -0.10                 | 0.39433 | 0.85426 | -0.38                      | -0.16 | 0.02  | -0.42 | -0.58   | -0.49                 | 0.32  |       |   |         |        |
| RPpos_426.3066_8.03    | RP    | pos        | 8.03            | 426.3066   |            |         | 4        |         | 0.19360                                 | 0.53912 | -0.34  | 0.42  | -1.59  | 0.01                  | 0.31  | 0.19                  | 0.95904 | 0.99539 | -0.02                      | -0.03 | -0.03 | -3.30 | 0.22    | 0.46                  | -0.07 |       |   |         |        |
| RPpos_426.3206_9.22    | RP    | pos        | 9.22            | 426.3206   |            |         | 4        |         | 0.12507                                 | 0.46079 | -0.37  | -0.04 | -0.30  | -0.36                 | -0.28 | -0.58                 | 0.01417 | 0.25391 | 0.47                       | 0.04  | 0.34  | 0.56  | 0.63    | 0.59                  | 0.44  |       |   |         |        |
| HILICpos_426.3569_0.61 | HILIC | pos        | 0.61            | 426.3569   |            |         | 4        |         | 0.67313                                 | 0.86385 | -0.14  | -0.14 | 0.16   | 0.01                  | 0.12  | -0.08                 | 0.03542 | 0.38421 | 0.28                       | 0.23  | -0.06 | 0.57  | 0.31    | 0.30                  | -0.10 |       |   |         |        |
| HILICneg_426.3236_4.33 | HILIC | neg        | 4.33            | 426.3236   |            |         | 4        |         | 0.92475                                 | 0.97276 | 0.00   | 0.45  | 0.33   | -0.02                 | 0.12  | 0.06                  | 0.05999 | 0.48016 | 0.28                       | 0.43  | 0.26  | 0.08  | 0.41    | 0.12                  | 0.12  |       |   |         |        |
| HILICneg_426.9682_0.47 | HILIC | neg        | 0.47            | 426.9682   |            |         | 4        |         | 0.18937                                 | 0.53580 | -0.29  | -0.09 | 0.06   | -0.13                 | 0.25  | -0.49                 | 0.04851 | 0.43985 | 0.34                       | 0.47  | 0.38  | 0.44  | 0.40    | 0.29                  | 0.10  |       |   |         |        |
| HILICneg_427.0298_0.88 | HILIC | neg        | 0.88            | 427.0298   |            |         | 4        |         | 0.03337                                 | 0.29799 | 0.33   | 0.20  | 0.06   | 0.38                  | 0.24  | 0.41                  | 0.43211 | 0.86996 | 0.31                       | 0.44  | -0.14 | 0.43  | 0.96    | 0.30                  | -0.11 |       |   |         |        |
| RPneg_427.11142_6.971  | RP    | neg        | 6.971           | 427.1114   |            |         | 4        |         | 0.54699                                 | 0.80208 | 0.37   | 0.78  | 0.50   | 0.04                  | 0.77  | -0.06                 | 0.21338 | 0.73018 | 0.74                       | 0.47  | 0.67  | 1.38  | 0.40    | 1.05                  | 0.01  |       |   |         |        |
| RPneg_427.11148_7.167  | RP    | neg        | 7.167           | 427.1115   |            |         | 4        |         | 0.47046                                 | 0.75742 | 0.39   | 0.64  | 0.56   | 0.24                  | 0.77  | -0.15                 | 0.20827 | 0.72407 | 0.83                       | 0.64  | 1.06  | 1.07  | 0.52    | 0.78                  | 0.32  |       |   |         |        |
| HILICneg_427.1117_0.41 | HILIC | neg        | 0.41            | 427.1117   |            |         | 4        |         | 0.82126                                 | 0.93204 | 0.27   | 0.70  | 0.40   | 0.06                  | 0.52  | 0.34                  | 0.08242 | 0.53478 | 0.68                       | 0.36  | 0.68  | 0.90  | 0.46    | 0.70                  | 0.04  |       |   |         |        |
| RPneg_427.13199_7.674  | RP    | neg        | 7.674           | 427.1320   |            |         | 4        |         | 0.52281                                 | 0.78923 | -0.07  | -0.07 | 0.05   | -0.01                 | 0.15  | -0.22                 | 0.52837 | 0.91029 | 0.19                       | 0.07  | 0.24  | 0.23  | 0.21    | 0.12                  | 0.18  |       |   |         |        |
| RPneg_427.13287_8.169  | RP    | neg        | 8.169           | 427.1329   |            |         | 4        |         | 0.41042                                 | 0.71573 | -0.09  | 0.03  | 0.07   | -0.06                 | 0.00  | 0.03                  | 0.61751 | 0.93244 | 0.00                       | -0.09 | 0.04  | 0.00  | -0.01   | -0.01                 | 0.09  |       |   |         |        |
| RPneg_427.14246_10.666 | RP    | neg        | 10.666          | 427.1425   |            |         | 4        |         | 0.00084                                 | 0.05802 | 1.23   | -0.05 | 0.47   | 0.81                  | 2.19  | 0.19                  | 0.96211 | 0.99566 | -0.04                      | -0.01 | 0.40  | -0.20 | -0.11   | -0.08                 | -0.09 |       |   |         |        |
| RPneg_427.15717_10.85  | RP    | neg        | 10.85           | 427.1572   |            |         | 4        |         | 0.04775                                 | 0.34111 | 0.52   | -0.10 | 0.14   | 0.06                  | 1.56  | -0.10                 | 0.42179 | 0.86946 | 0.23                       | 0.03  | 0.63  | 0.30  | 0.19    | 0.27                  | -0.16 |       |   |         |        |
| RPneg_427.15976_13.191 | RP    | neg        | 13.191          | 427.1598   |            |         | 4        |         | 0.29488                                 | 0.62651 | -0.32  | 0.19  | -0.39  | -0.15                 | 0.33  | -0.04                 | 0.14365 | 0.64563 | -0.22                      | 0.10  | -0.12 | -0.55 | -0.47   | -0.06                 | 0.34  |       |   |         |        |
| RPneg_427.16089_6.235  | RP    | neg        | 6.235           | 427.1609   |            |         | 4        |         | 0.05772                                 | 0.36207 | 0.64   | 0.41  | 0.72   | 0.56                  | 0.55  | 2.84                  | 0.69778 | 0.95114 | -0.12                      | -0.11 | -0.15 | -0.11 | -0.10   | -0.11                 | -0.07 |       |   |         |        |
| HILICpos_427.1726_5.64 | HILIC | pos        | 5.64            | 427.1726   |            |         | 4        |         | 0.82776                                 | 0.93484 | 0.01   | -0.05 | 0.66   | 0.64                  | 0.10  | -0.92                 | 0.00079 | 0.04880 | 0.61                       | 0.60  | 0.39  | 1.05  | 0.51    | 0.45                  | -0.32 |       |   |         |        |
| HILICpos_427.1735_5.92 | HILIC | pos        | 5.92            | 427.1735   |            |         | 4        |         | 0.50402                                 | 0.77865 | -0.12  | 0.28  | 0.47   | 0.15                  | -0.22 | -0.29                 | 0.05225 | 0.45459 | 0.66                       | 0.48  | 0.56  | 0.71  | 0.96    | 0.61                  | -0.55 |       |   |         |        |
| HILICpos_427.1777_5.8  | HILIC | pos        | 5.8             | 427.1777   |            |         | 4        |         | 0.70415                                 | 0.87908 | 0.15   | 0.65  | 0.80   | 0.13                  | 0.30  | -0.11                 | 0.05159 | 0.45272 | 0.39                       | 1.43  | 1.34  | 1.86  | 0.97    | 1.16                  | -0.51 |       |   |         |        |
| RPneg_427.1804_7.014   | RP    | neg        | 7.014           | 427.1804   |            |         | 4        |         | 0.98514                                 | 0.99446 | 0.09   | 0.01  | 0.04   | 0.23                  | 0.05  | 0.07                  | 0.04327 | 0.99197 | -0.09                      | -0.17 | -0.11 | 0.12  | -0.10   | -0.03                 | -0.08 |       |   |         |        |
| RPneg_427.18042_6.656  | RP    | neg        | 6.656           | 427.1804   |            |         | 4        |         | 0.01660                                 | 0.23812 | 0.29   | 0.04  | 0.38   | 0.31                  | 0.73  | 0.43                  | 0.00034 | 0.02862 | 0.35                       | 0.17  | 0.04  | 0.48  | 0.66    | 0.52                  | -0.14 |       |   |         |        |
| RPneg_427.19638_5.241  | RP    | neg        | 5.241           | 427.1964   |            |         | 4        |         | 0.00479                                 | 0.13767 | 0.67   | 0.51  | 0.92   | 1.17                  | 0.41  | -0.55                 | 0.14204 | 0.64445 | 0.40                       | 0.06  | 0.22  | 0.42  | 0.66    | 0.39                  | -0.01 |       |   |         |        |
| RPneg_427.19669_5.117  | RP    | neg        | 5.117           | 427.1967   |            |         | 4        |         | 0.00167                                 | 0.08275 | 0.41   | 0.28  | 0.83   | 0.69                  | 0.17  | -0.48                 | 0.18991 | 0.70521 | 0.35                       | -0.02 | 0.24  | 0.53  | 0.46    | 0.41                  | -0.13 |       |   |         |        |
| RPneg_427.19705_7.398  | RP    | neg        | 7.398           | 427.1971   |            |         | 4        |         | 0.45603                                 | 0.74814 | 0.32   | 0.28  | 0.64   | 0.42                  | 0.60  | 0.13                  | 0.16406 | 0.67450 | 0.18                       | -0.34 | 0.16  | 0.26  | 0.27    | 0.16                  | 0.04  |       |   |         |        |
| RPneg_427.21545_8.102  | RP    | neg        | 8.102           | 427.2155   |            |         | 4        |         | 0.65971                                 | 0.85748 | -0.01  | 0.03  | 0.05   | 0.11                  | 0.12  | 0.02                  | 0.36657 | 0.83871 | 0.08                       | 0.09  | 0.11  | 0.08  | 0.13    | 0.07                  | 0.03  |       |   |         |        |
| RPneg_427.21545_8.64   | RP    | neg        | 8.64            | 427.2155   |            |         | 4        |         | 0.58590                                 | 0.82164 | 0.09   | 0.12  | 0.09   | 0.06                  | 0.28  | 0.20                  | 0.56020 | 0.91988 | 0.01                       | 0.07  | 0.02  | 0.05  | 0.04    | -0.05                 | 0.09  |       |   |         |        |
| RPneg_427.21555_9.016  | RP    | neg        | 9.016           | 427.2156   |            |         | 4        |         | 0.12586                                 | 0.46178 | 0.20   | 0.28  | 0.27   | 0.14                  | 0.39  | 0.26                  | 0.29492 | 0.79846 | 0.08                       | -0.05 | 0.13  | 0.10  | 0.18    | 0.01                  | 0.13  |       |   |         |        |
| RPneg_427.21576_7.609  | RP    | neg        | 7.609           | 427.2158   |            |         | 4        |         | 0.10491                                 | 0.43795 | -0.08  | 0.00  | -0.01  | -0.09                 | 0.07  | -0.05                 | 0.37171 | 0.84150 | 0.04                       | 0.07  | 0.09  | 0.01  | 0.09    | 0.04                  | 0.05  |       |   |         |        |
| RPneg_427.21616_12.051 | RP    | neg        | 12.051          | 427.2162   |            |         | 4        |         | 0.83176                                 | 0.93468 | 0.07   | 0.59  | 0.01   | 0.44                  | 0.00  | -0.88                 | 0.77091 | 0.96458 | -0.10                      | -0.04 | -0.33 | -0.44 | -0.13   | 0.10                  | 0.87  |       |   |         |        |
| RPneg_427.21725_4.534  | RP    | neg        | 4.534           | 427.2173   |            |         | 4        |         | 0.36051                                 | 0.67893 | 0.35   | -0.05 | 1.06   | 0.42                  | 0.69  | 0.33                  | 0.88190 | 0.98281 | 0.04                       | -0.20 | 0.05  | 0.02  | 0.37    | -0.14                 | -0.06 |       |   |         |        |
| HILICneg_427.2174_1.84 | HILIC | neg        | 1.84            | 427.2174   |            |         | 4        |         |                                         |         |        |       |        |                       |       |                       |         |         |                            |       |       |       |         |                       |       |       |   |         |        |



| Feature_ID             | Mode  | Ionization | Average_Rt.min. | Average_Mz | Metabolite                                          | MSMS                                                                                                                                 | ID_Level | HMDB_ID | IV-Alcohol self-administration (IV-ASA) |         |                       |       |       |                       |       |                       |         |         | IV-Alcohol clamp (IV-AC)   |       |                       |       |       |                       |       |                       |   |   |
|------------------------|-------|------------|-----------------|------------|-----------------------------------------------------|--------------------------------------------------------------------------------------------------------------------------------------|----------|---------|-----------------------------------------|---------|-----------------------|-------|-------|-----------------------|-------|-----------------------|---------|---------|----------------------------|-------|-----------------------|-------|-------|-----------------------|-------|-----------------------|---|---|
|                        |       |            |                 |            |                                                     |                                                                                                                                      |          |         | Area Under the Curve (AUC)              |         |                       |       |       | IV-Ghrelin or Placebo |       |                       |         |         | Area Under the Curve (AUC) |       |                       |       |       | IV-Ghrelin or Placebo |       |                       |   |   |
|                        |       |            |                 |            |                                                     |                                                                                                                                      |          |         | Baseline                                |         | IV-Ghrelin or Placebo |       |       | Baseline              |       | IV-Ghrelin or Placebo |         |         | Baseline                   |       | IV-Ghrelin or Placebo |       |       | Baseline              |       | IV-Ghrelin or Placebo |   |   |
|                        |       |            |                 |            |                                                     |                                                                                                                                      |          |         | p                                       | q       | d                     | d     | d     | d                     | d     | d                     | d       | d       | p                          | q     | d                     | d     | d     | d                     | d     | d                     | d | d |
| RPneg_432.16058_10.882 | RP    | neg        | 10.882          | 432.1606   |                                                     |                                                                                                                                      | 4        |         | 0.23209                                 | 0.64910 | -0.25                 | 0.04  | -0.11 | -0.39                 | 1.12  | -0.06                 | 0.95467 | 0.99409 | -0.03                      | -0.18 | 0.27                  | -0.37 | -0.06 | -0.03                 | 0.13  |                       |   |   |
| RPneg_432.18188_11.1   | RP    | neg        | 11.1            | 432.1819   |                                                     |                                                                                                                                      | 4        |         | 0.45989                                 | 0.75068 | -0.24                 | -0.16 | -0.21 | 0.64                  | 1.28  | -0.14                 | 0.97407 | 0.99690 | 0.01                       | 0.24  | 0.00                  | -0.48 | -0.01 | 0.15                  | 0.59  |                       |   |   |
| RPpos_432.2744_11.52   | RP    | pos        | 11.52           | 432.2744   |                                                     |                                                                                                                                      | 4        |         | 0.60909                                 | 0.83311 | -0.14                 | -0.14 | 0.38  | 0.37                  | -0.01 | 0.57                  | 0.19945 | 0.71508 | -0.42                      | -0.01 | -0.75                 | -1.08 | 0.20  | 0.16                  | -0.59 |                       |   |   |
| HILICpos_432.2792_0.62 | HILIC | pos        | 0.62            | 432.2792   |                                                     |                                                                                                                                      | 4        |         | 0.13951                                 | 0.47913 | -0.40                 | -0.34 | 0.33  | 0.17                  | -0.44 | 0.01                  | 0.06489 | 0.49314 | -0.46                      | -0.33 | -0.30                 | -0.48 | -0.21 | -0.13                 | -0.25 |                       |   |   |
| RPpos_432.2799_4.38    | RP    | pos        | 4.38            | 432.2799   |                                                     |                                                                                                                                      | 4        |         | 0.28536                                 | 0.46    | -0.35                 | -0.16 | 0.46  | 0.04                  | -0.49 | 0.36                  | 0.05705 | 0.49261 | -0.54                      | -0.40 | -0.17                 | -0.37 | -0.25 | -0.45                 | -0.65 |                       |   |   |
| RPpos_432.2802_4.54    | RP    | pos        | 4.54            | 432.2802   |                                                     |                                                                                                                                      | 4        |         | 0.29953                                 | 0.62890 | -0.34                 | 0.01  | 0.83  | -0.36                 | -0.17 | -0.05                 | 0.02813 | 0.49    | -0.49                      | -0.25 | 0.24                  | -0.62 | 0.01  | -0.01                 | -0.65 |                       |   |   |
| RPpos_432.296_9.81     | RP    | pos        | 9.81            | 432.2960   |                                                     |                                                                                                                                      | 4        |         | 0.44533                                 | 0.74083 | 0.25                  | 0.62  | 0.46  | 0.24                  | 0.62  | -0.14                 | 0.09855 | 0.56978 | -1.09                      | -0.22 | -0.09                 | 1.12  | -0.94 | -1.13                 | 0.23  |                       |   |   |
| RPneg_432.29666_8.387  | RP    | neg        | 8.387           | 432.2967   |                                                     |                                                                                                                                      | 4        |         | 0.45388                                 | 0.74651 | 0.24                  | 0.32  | 0.29  | 0.20                  | 0.79  | 0.15                  | 0.17998 | 0.69487 | 0.28                       | 0.17  | 0.47                  | 0.01  | 0.19  | 0.54                  | 0.33  |                       |   |   |
| HILICpos_432.3098_1.01 | HILIC | pos        | 1.01            | 432.3098   |                                                     |                                                                                                                                      | 4        |         | 0.00044                                 | 0.03834 | 0.80                  | 0.12  | 0.99  | 1.01                  | 1.28  | 1.31                  | 0.00022 | 0.02102 | 0.51                       | -0.25 | 0.70                  | 1.06  | 0.50  | 0.51                  | -0.50 |                       |   |   |
| RPpos_432.3106_8.19    | RP    | pos        | 8.19            | 432.3106   |                                                     |                                                                                                                                      | 4        |         | 0.05612                                 | 0.35868 | 0.33                  | 0.02  | 0.95  | 0.38                  | 0.50  | 0.29                  | 0.18821 | 0.70327 | 0.21                       | -0.22 | 0.37                  | 0.38  | 0.23  | 0.25                  | -0.30 |                       |   |   |
| RPpos_432.3107_8.53    | RP    | pos        | 8.53            | 432.3107   |                                                     |                                                                                                                                      | 4        |         | 0.00002                                 | 0.00685 | 0.67                  | 0.44  | 1.29  | 0.66                  | 0.71  | 0.54                  | 0.13326 | 0.63021 | 1.17                       | 0.63  | 1.19                  | 1.23  | 1.46  | 1.24                  | 0.03  |                       |   |   |
| RPpos_432.3107_9.31    | RP    | pos        | 9.31            | 432.3107   |                                                     |                                                                                                                                      | 4        |         | 0.00035                                 | 0.03477 | 0.56                  | 0.08  | 0.71  | 0.63                  | 0.87  | 1.21                  | 0.18246 | 0.69799 | 0.61                       | -0.30 | 0.83                  | 1.01  | 0.62  | 0.81                  | -0.47 |                       |   |   |
| RPpos_432.3107_9.17    | RP    | pos        | 9.17            | 432.3107   | fragment of chenodeoxycholic acid glycine conjugate | 414.2991 (100), 339.2708 (30), 76.0398 (30), 321.2594 (25), 158.0810 (20), 201.1648 (15), 175.1492 (15), 215.1787 (15), 432.3123 (5) | 4        |         | 0.00057                                 | 0.04533 | 0.81                  | 0.09  | 1.16  | 0.92                  | 1.21  | 1.08                  | 0.00001 | 0.00229 | 0.45                       | -0.23 | 0.66                  | 0.90  | 0.41  | 0.40                  | -0.41 |                       |   |   |
| RPpos_432.3108_8.74    | RP    | pos        | 8.74            | 432.3108   |                                                     |                                                                                                                                      | 4        |         | 0.12365                                 | 0.45914 | 0.09                  | -0.02 | 0.21  | 0.11                  | 0.15  | 0.09                  | 0.76706 | 0.96401 | 0.01                       | -0.05 | -0.09                 | -0.04 | 0.08  | 0.13                  | 0.08  |                       |   |   |
| HILICneg_432.3112_0.63 | HILIC | neg        | 0.63            | 432.3112   |                                                     |                                                                                                                                      | 4        |         | 0.00032                                 | 0.03385 | 1.43                  | 1.26  | 1.64  | 1.93                  | 0.26  | 4.45                  | 0.01773 | 0.28470 | 1.73                       | 0.60  | 2.56                  | 2.29  | 1.59  | 0.67                  | -0.13 |                       |   |   |
| RPpos_432.3114_9       | RP    | pos        | 9               | 432.3114   |                                                     |                                                                                                                                      | 4        |         | 0.39508                                 | 0.70478 | 0.05                  | 0.06  | 0.27  | -0.06                 | 0.22  | 0.40                  | 0.99946 | 0.99966 | -0.05                      | -0.05 | 0.02                  | -0.19 | -0.12 | 0.10                  | -0.10 |                       |   |   |
| RPpos_432.3225_10.16   | RP    | pos        | 10.16           | 432.3225   |                                                     |                                                                                                                                      | 4        |         | 0.39467                                 | 0.70449 | 0.27                  | 0.62  | 0.64  | 0.08                  | 0.53  | 0.04                  | 0.26562 | 0.77769 | -0.51                      | -0.04 | -0.20                 | -0.53 | -0.27 | -0.88                 | 0.07  |                       |   |   |
| RPpos_432.7569_13.09   | RP    | pos        | 13.09           | 432.7569   |                                                     |                                                                                                                                      | 4        |         | 0.66047                                 | 0.85781 | 0.03                  | 0.26  | 0.15  | 0.19                  | -0.04 | 0.41                  | 0.85201 | 0.77668 | 0.03                       | -0.15 | 0.09                  | 0.07  | 0.28  | 0.27                  | -0.40 |                       |   |   |
| HILICneg_432.7927_1.45 | HILIC | neg        | 1.45            | 432.7927   |                                                     |                                                                                                                                      | 4        |         | 0.58896                                 | 0.82342 | -0.11                 | -0.17 | -0.38 | 0.01                  | 0.22  | 0.24                  | 0.02325 | 0.32151 | -0.35                      | -0.40 | -0.39                 | -0.58 | -0.20 | -0.27                 | -0.06 |                       |   |   |
| HILICneg_432.8569_3.14 | HILIC | neg        | 3.14            | 432.8569   |                                                     |                                                                                                                                      | 4        |         | 0.07709                                 | 0.39823 | -0.43                 | 0.11  | -0.36 | -0.05                 | 0.17  | -0.59                 | 0.38935 | 0.85129 | -0.15                      | -0.47 | -0.08                 | -0.24 | -0.28 | -0.27                 | 0.40  |                       |   |   |
| HILICpos_433.0747_5.8  | HILIC | pos        | 5.8             | 433.0747   |                                                     |                                                                                                                                      | 4        |         | 0.21418                                 | 0.55663 | 0.35                  | 0.43  | 1.17  | 0.30                  | 0.15  | -0.58                 | 0.02241 | 0.31659 | 1.34                       | 1.04  | 1.39                  | 1.67  | 1.23  | 0.67                  | 0.40  |                       |   |   |
| RPneg_433.15747_10.919 | RP    | neg        | 10.919          | 433.1575   |                                                     |                                                                                                                                      | 4        |         | 0.00094                                 | 0.06221 | 1.30                  | 0.02  | 0.76  | 1.19                  | 2.18  | 0.28                  | 0.97399 | 0.99690 | -0.07                      | -0.24 | 0.28                  | 0.00  | -0.15 | -0.33                 | -0.14 |                       |   |   |
| RPneg_433.17059_11.196 | RP    | neg        | 11.196          | 433.1706   |                                                     |                                                                                                                                      | 4        |         | 0.44123                                 | 0.73821 | 0.46                  | 0.30  | -0.16 | 1.19                  | 1.22  | -0.41                 | 0.76502 | 0.96338 | -0.05                      | -0.19 | -0.30                 | 0.36  | -0.30 | 0.03                  | 0.17  |                       |   |   |
| RPneg_433.19095_10.875 | RP    | neg        | 10.875          | 433.1910   |                                                     |                                                                                                                                      | 4        |         | 0.09895                                 | 0.42958 | 0.50                  | 0.34  | 0.36  | 0.16                  | 1.76  | 0.40                  | 0.84736 | 0.97724 | 0.00                       | -0.24 | 0.80                  | -0.18 | -0.35 | 0.11                  | 0.19  |                       |   |   |
| HILICpos_433.1996_0.54 | HILIC | pos        | 0.54            | 433.1996   |                                                     |                                                                                                                                      | 4        |         | 0.34046                                 | 0.66286 | -0.18                 | -0.17 | 0.35  | 0.09                  | -0.36 | 0.13                  | 0.48701 | 0.89768 | -0.38                      | -0.14 | -0.25                 | -0.59 | 0.20  | -0.03                 | -0.46 |                       |   |   |
| RPneg_433.20676_7.083  | RP    | neg        | 7.083           | 433.2068   |                                                     |                                                                                                                                      | 4        |         | 0.04797                                 | 0.34175 | 0.58                  | 0.09  | 1.35  | 0.96                  | 0.02  | -0.15                 | 0.00885 | 0.20037 | 0.78                       | 0.33  | 0.75                  | 1.10  | 1.01  | 0.92                  | -0.10 |                       |   |   |
| RPpos_433.2076_3.55    | RP    | pos        | 3.55            | 433.2076   |                                                     |                                                                                                                                      | 4        |         | 0.22835                                 | 0.57010 | -0.20                 | -0.03 | -0.15 | -0.23                 | -0.09 | -0.58                 | 0.38900 | 0.85116 | -0.09                      | -0.11 | -0.11                 | 1.19  | 0.03  | -0.03                 | -0.15 |                       |   |   |
| RPneg_433.20801_7.013  | RP    | neg        | 7.013           | 433.2080   |                                                     |                                                                                                                                      | 4        |         | 0.03544                                 | 0.30847 | 0.64                  | 0.10  | 2.24  | 0.85                  | -0.17 | 0.20                  | 0.00419 | 0.13397 | 1.09                       | 0.37  | 1.25                  | 2.17  | 1.23  | 0.61                  | -0.07 |                       |   |   |
| RPpos_433.2097_10.78   | RP    | pos        | 10.78           | 433.2097   |                                                     |                                                                                                                                      | 4        |         | 0.83206                                 | 0.93658 | -0.06                 | 0.16  | 0.42  | 0.67                  | 0.39  | -0.28                 | 0.11784 | 0.60333 | 0.11                       | 0.14  | 0.06                  | 0.14  | 0.51  | 0.25                  | -0.07 |                       |   |   |
| RPneg_433.21951_9.817  | RP    | neg        | 9.817           | 433.2195   |                                                     |                                                                                                                                      | 4        |         | 0.68640                                 | 0.87067 | 0.19                  | 0.45  | 0.48  | -0.11                 | 0.13  | 1.02                  | 0.47577 | 0.89280 | 0.07                       | 0.36  | 0.01                  | 0.07  | 0.33  | 0.04                  | -0.06 |                       |   |   |
| HILICneg_433.2200_0.8  | HILIC | neg        | 0.8             | 433.2200   |                                                     |                                                                                                                                      | 4        |         | 0.39094                                 | 0.70994 | 0.43                  | 0.39  | 1.32  | 0.02                  | 0.15  | 0.38                  | 0.90276 | 0.98582 | -0.04                      | 0.33  | -0.01                 | 0.07  | -0.17 | -0.20                 | -0.03 |                       |   |   |
| HILICneg_433.2222_0.59 | HILIC | neg        | 0.59            | 433.2222   |                                                     |                                                                                                                                      | 4        |         | 0.68400                                 | 0.86937 | 0.00                  | 0.08  | 0.19  | -0.02                 | -0.05 | 0.10                  | 0.11686 | 0.60178 | 0.11                       | 0.09  | 0.14                  | 0.08  | 0.11  | 0.05                  | 0.20  |                       |   |   |
| RPneg_433.2236_9.381   | RP    | neg        | 9.381           | 433.2236   |                                                     |                                                                                                                                      | 4        |         | 0.85493                                 | 0.94567 | 0.02                  | 0.05  | 0.14  | -0.02                 | 0.04  | 0.00                  | 0.05663 | 0.46911 | 0.13                       | 0.14  | 0.13                  | 0.17  | 0.13  | 0.10                  | 0.14  |                       |   |   |
| RPpos_433.2409_6.45    | RP    | pos        | 6.45            | 433.2409   |                                                     |                                                                                                                                      | 4        |         | 0.75711                                 | 0.90397 | -0.07                 | -0.25 | 0.37  | -0.06                 | -0.07 | 0.27                  | 0.99755 | 0.99953 | -0.01                      | 0.05  | 0.10                  | 0.15  | -0.02 | -0.66                 | -0.12 |                       |   |   |
| HILICneg_433.2583_0.39 | HILIC | neg        | 0.39            | 433.2583   |                                                     |                                                                                                                                      | 4        |         | 0.06119                                 | 0.36844 | 0.59                  | 0.45  | 0.18  | 0.08                  | 1.79  | 0.74                  | 0.79346 | 0.96769 | 0.00                       | 0.57  | 0.47                  | 0.01  | -0.10 | -0.10                 | -0.22 |                       |   |   |
| RPneg_433.25839_8.941  | RP    | neg        | 8.941           | 433.2584   |                                                     |                                                                                                                                      | 4        |         | 0.00395                                 | 0.12877 | -0.67                 | -0.36 | -0.36 | -0.11                 | -0.56 | -0.23                 | 0.06299 | 0.48778 | -0.46                      | -0.37 | -0.13                 | -0.54 | -0.60 | -0.52                 | -0.48 |                       |   |   |
| RPneg_433.25928_11.062 | RP    | neg        | 11.062          | 433.2593   |                                                     |                                                                                                                                      | 4        |         | 0.43711                                 | 0.73499 | 0.18                  | 0.19  | 0.04  | -0.18                 | 0.89  | 1.16                  | 0.81414 | 0.97171 | -0.02                      | 1.12  | 0.79                  | -0.05 | -0.11 | -0.10                 | -0.41 |                       |   |   |
| RPpos_433.2625_7.61    | RP    | pos        | 7.61            | 433.2625   |                                                     |                                                                                                                                      | 4        |         | 0.45325                                 | 0.74620 | -0.24                 | -0.07 | 0.95  | -0.44                 | -0.30 | 0.77                  | 0.40943 | 0.86259 | -0.25                      | -0.18 | -0.04                 | -0.25 | -0.16 | -0.38                 | -0.17 |                       |   |   |
| RPpos_433.2638_11.53   | RP    | pos        | 11.53           | 433.2638   |                                                     |                                                                                                                                      | 4        |         | 0.96871                                 | 0.98830 | -0.02                 | -0.51 | 0.65  | -0.13                 | 0.21  | 0.32                  | 0.81732 | 0.97227 | -0.09                      | -0.22 | 0.06                  | -0.04 | 0.53  | -0.76                 | 0.13  |                       |   |   |
| RPneg_433.27957_8.925  | RP    | neg        | 8.925           | 433.2796   |                                                     |                                                                                                                                      | 4        |         | 0.02691                                 | 0.28244 | -0.11                 | 0.17  | 0.14  | 0.24                  | -0.42 | 0.07                  | 0.21585 | 0.73213 | 0.33                       | 0.33  | 0.43                  | 0.40  | 0.30  | 0.34                  | 0.50  |                       |   |   |
| RPneg_433.27988_9.233  | RP    | neg        | 9.233           | 433.2799   |                                                     |                                                                                                                                      | 4        |         | 0.61840                                 | 0.83790 | -0.13                 | 0.49  | 0.08  | -0.11                 | -0.05 | -0.40                 | 0.07908 | 0.52822 | 0.40                       | -0.34 | -0.19                 | -0.12 | 0.66  | 0.56                  | 0.27  |                       |   |   |
| HILICneg_433.2805_1.8  | HILIC | neg        | 1.8             | 433.2805   |                                                     |                                                                                                                                      | 4        |         | 0.61610                                 | 0.83659 | -0.05                 | 0.17  | 0.16  | -0.11                 | 0.08  | -0.18                 | 0.11674 | 0.60178 | 0.35                       | 0.04  | 0.17                  | 0.34  | 0.81  | 0.40                  | 0.36  |                       |   |   |
| RPpos_433.2825_12.02   | RP    | pos        | 12.02           | 433.2825   |                                                     |                                                                                                                                      | 4        |         | 0.24504                                 | 0.58613 | -0.27                 | 0.15  | 0.06  | 0.21                  | -0.08 | -0.14                 | 0.66426 | 0.94310 | 0.26                       | -0.18 | -0.38                 | 0.06  | 0.37  | 0.47                  | 0.66  |                       |   |   |
| HILICpos_433.3674_0.39 | HILIC | pos        | 0.39            | 433.3674   |                                                     |                                                                                                                                      | 4        |         | 0.69534                                 | 0.87498 | -0.10                 | -0.03 | -0.07 | -0.20                 | 0.28  | 0.45                  | 0.17538 | 0.69013 | -0.21                      | 0.11  | 0.38                  | 0.14  | 0.23  | 0.21                  | 0.04  |                       |   |   |
| RPpos_433.3689_11.837  | RP    | pos        | 11.837          | 433.3689   |                                                     |                                                                                                                                      | 4        |         | 0.03414                                 | 0.22520 | 0.16                  | 0.20  | 0.09  | 0.04                  | 0.70  | 0.07                  | 0.54830 | 0.91689 | -0.18                      | 0.18  | -0.11                 | 0.24  | 0.11  | -0.19                 | -0.43 |                       |   |   |
| RPpos_433.7836_10.87   | RP    | pos        | 10.87           | 433.7836   |                                                     |                                                                                                                                      | 4        |         | 0.54975                                 | 0.80257 | 0.21                  | 0.44  | -0.05 | -0.35                 | 1.99  | 0.14                  | 0.65836 | 0       |                            |       |                       |       |       |                       |       |                       |   |   |

| Feature_ID             | Mode  | Ionization | Average_Rt.min. | Average_Mz | Metabolite | MSMS | ID_Level | HMDB_ID   | IV-Alcohol self-administration (IV-ASA) |       |       |        |       |       |                       |         |         |          |       |       | IV-Alcohol clamp (IV-AC)   |       |       |       |   |   |                       |   |   |        |   |   |
|------------------------|-------|------------|-----------------|------------|------------|------|----------|-----------|-----------------------------------------|-------|-------|--------|-------|-------|-----------------------|---------|---------|----------|-------|-------|----------------------------|-------|-------|-------|---|---|-----------------------|---|---|--------|---|---|
|                        |       |            |                 |            |            |      |          |           | Area Under the Curve (AUC)              |       |       |        |       |       | IV-Ghrelin or Placebo |         |         |          |       |       | Area Under the Curve (AUC) |       |       |       |   |   | IV-Ghrelin or Placebo |   |   |        |   |   |
|                        |       |            |                 |            |            |      |          |           | Baseline                                |       |       | IV-ASA |       |       | BrAC=0                |         |         | Baseline |       |       | Post-LD                    |       |       | IV-AC |   |   | Post-AC               |   |   | BrAC=0 |   |   |
|                        |       |            |                 |            |            |      |          |           | p                                       | q     | d     | d      | d     | d     | p                     | q       | d       | p        | q     | d     | p                          | q     | d     | p     | q | d | p                     | q | d | p      | q | d |
| HILICpos_436.2165_0.39 | HILIC | pos        | 0.39            | 436.2165   |            | 4    |          | 0.30500   | 0.63407                                 | -0.36 | 0.07  | -0.14  | -0.10 | 0.33  | 0.23                  | 0.35122 | 0.83176 | -0.28    | 0.55  | 0.13  | 0.56                       | -0.29 | -0.46 | -0.36 |   |   |                       |   |   |        |   |   |
| RPpos_436.2173_6.7     | RP    | pos        | 6.7             | 436.2173   |            | 4    |          | 0.51964   | 0.78761                                 | -0.24 | 0.46  | 0.54   | -0.01 | 0.38  | 0.07                  | 0.73578 | 0.95858 | -0.18    | 0.72  | 0.14  | 0.30                       | -0.14 | -0.39 | -0.73 |   |   |                       |   |   |        |   |   |
| HILICpos_436.2181_1.64 | HILIC | pos        | 1.64            | 436.2181   |            | 4    |          | 0.90618   | 0.96548                                 | 0.06  | 0.22  | 0.62   | 0.23  | 0.21  | -0.19                 | 0.00012 | 0.01377 | 1.19     | 0.66  | 1.02  | 1.39                       | 1.38  | 0.89  | -0.16 |   |   |                       |   |   |        |   |   |
| HILICpos_436.2189_1.73 | HILIC | pos        | 1.73            | 436.2183   |            | 4    |          | 0.78922   | 0.91753                                 | 0.10  | 0.11  | 0.70   | 0.00  | 0.38  | 0.08                  | 0.00013 | 0.01459 | 0.91     | 0.89  | 0.88  | 0.95                       | 1.67  | 0.43  | -0.28 |   |   |                       |   |   |        |   |   |
| RPpos_436.2322_7.73    | RP    | pos        | 7.73            | 436.2322   |            | 4    |          | 0.48023   | 0.77142                                 | -0.21 | -0.13 | 0.50   | -0.21 | -0.45 | 0.03                  | 0.74044 | 0.95981 | -0.15    | -0.02 | 0.30  | -0.67                      | 0.36  | -0.39 | -0.06 |   |   |                       |   |   |        |   |   |
| RPpos_436.2387_8.91    | RP    | pos        | 8.91            | 436.2387   |            | 4    |          | 0.90787   | 0.97591                                 | -0.51 | 0.57  | 1.51   | 0.93  | -0.01 | -0.72                 | 0.44453 | 0.87898 | -0.11    | 0.27  | 0.46  | 0.84                       | 0.46  | -0.14 | -0.09 |   |   |                       |   |   |        |   |   |
| RPpos_436.2686_9.35    | RP    | pos        | 9.35            | 436.2686   |            | 4    |          | 0.86405   | 0.94932                                 | -0.05 | -0.26 | 0.86   | 0.37  | 0.09  | 0.34                  | 0.51261 | 0.90638 | -0.18    | 0.51  | -0.22 | -0.35                      | -0.16 | 0.03  | -0.11 |   |   |                       |   |   |        |   |   |
| RPpos_436.2691_8.53    | RP    | pos        | 8.53            | 436.2691   |            | 4    |          | 0.08040   | 0.40483                                 | -0.37 | -0.04 | 0.52   | -0.10 | -0.72 | 0.21                  | 0.39113 | 0.85188 | -0.48    | 0.03  | -0.07 | -0.86                      | 0.05  | -0.34 | -0.19 |   |   |                       |   |   |        |   |   |
| RPneg_436.2830_10.728  | RP    | neg        | 10.728          | 436.2830   |            | 4    |          | 0.02519   | 0.27448                                 | -0.39 | -0.08 | -0.17  | -0.46 | -0.29 | -0.11                 | 0.83250 | 0.97501 | 0.15     | 0.17  | 0.17  | 0.22                       | 0.32  | 0.02  | -0.06 |   |   |                       |   |   |        |   |   |
| HILICneg_436.2834_1.71 | HILIC | neg        | 1.71            | 436.2834   |            | 4    |          | 0.01626   | 0.23634                                 | -0.48 | -0.15 | -0.31  | -0.43 | -0.32 | -0.36                 | 0.69098 | 0.95008 | 0.29     | 0.39  | 0.33  | 0.51                       | 0.28  | 0.16  | -0.03 |   |   |                       |   |   |        |   |   |
| RPneg_436.30603_9.381  | RP    | neg        | 9.381           | 436.3060   |            | 4    |          | 0.83843   | 0.93926                                 | 0.03  | -0.04 | 0.24   | 0.09  | 0.06  | -0.02                 | 0.25354 | 0.76898 | 0.14     | -0.01 | -0.07 | 0.25                       | 0.19  | 0.25  | 0.10  |   |   |                       |   |   |        |   |   |
| HILICneg_436.7163_3.16 | HILIC | neg        | 3.16            | 436.7163   |            | 4    |          | 0.48824   | 0.77009                                 | -0.24 | 0.23  | 0.10   | -0.06 | -0.16 | 1.45                  | 0.97220 | 0.99673 | -0.01    | 0.03  | -0.14 | 0.70                       | 0.00  | 0.07  | -0.69 |   |   |                       |   |   |        |   |   |
| RPpos_436.7752_6.19    | RP    | pos        | 6.19            | 436.7752   |            | 4    |          | 0.25624   | 0.59435                                 | -0.36 | -0.07 | 0.72   | -0.36 | -0.35 | 0.11                  | 0.70362 | 0.95228 | 0.08     | -0.10 | 0.05  | 0.55                       | 0.14  | 0.24  | -0.55 |   |   |                       |   |   |        |   |   |
| RPpos_436.7758_7.52    | RP    | pos        | 7.52            | 436.7758   |            | 4    |          | 0.52788   | 0.79204                                 | -0.16 | -0.17 | 0.66   | -0.13 | -0.30 | 0.34                  | 0.89368 | 0.98445 | -0.03    | 0.03  | 0.14  | 0.12                       | 0.21  | -0.65 | -0.31 |   |   |                       |   |   |        |   |   |
| RPpos_436.7771_13.6    | RP    | pos        | 13.6            | 436.7771   |            | 4    |          | 0.57587   | 0.81625                                 | -0.15 | 0.22  | -0.11  | -0.17 | -0.06 | 0.17                  | 0.09437 | 0.56236 | -0.31    | -0.12 | -0.47 | -0.54                      | 0.15  | -0.30 | -0.26 |   |   |                       |   |   |        |   |   |
| HILICneg_436.943_0.48  | HILIC | neg        | 0.48            | 436.9430   |            | 4    |          | 0.09897   | 0.42958                                 | 0.34  | 0.31  | 0.46   | 0.23  | 0.29  | 0.94                  | 0.52398 | 0.90943 | -0.32    | -0.58 | -0.22 | -0.20                      | -0.29 | -0.36 | -0.29 |   |   |                       |   |   |        |   |   |
| HILICneg_436.9538_4.33 | HILIC | neg        | 4.33            | 436.9538   |            | 4    |          | 0.73709   | 0.89383                                 | -0.01 | 0.06  | 0.16   | 0.18  | 0.13  | 0.26                  | 0.06891 | 0.50310 | 0.27     | 0.37  | 0.17  | 0.36                       | 0.54  | 0.03  | -0.02 |   |   |                       |   |   |        |   |   |
| RPneg_437.0536_6.576   | RP    | neg        | 6.576           | 437.0536   |            | 4    |          | 0.36855   | 0.68513                                 | 0.20  | 0.02  | 1.38   | 0.31  | -0.13 | -0.13                 | 0.25700 | 0.77240 | 4.26     | 1.87  | 1.98  | 11.12                      | 0.65  | 6.35  | -0.50 |   |   |                       |   |   |        |   |   |
| RPneg_437.05518_6.543  | RP    | neg        | 6.543           | 437.0552   |            | 4    |          | 0.03832   | 0.82053                                 | 0.10  | 0.20  | 0.19   | 0.10  | 0.38  | -0.53                 | 0.38656 | 0.85022 | 1.49     | 0.02  | 2.29  | 1.77                       | 1.43  | 1.06  | -0.07 |   |   |                       |   |   |        |   |   |
| RPneg_437.08307_2.112  | RP    | neg        | 2.112           | 437.0831   |            | 4    |          | 0.86097   | 0.94799                                 | 0.06  | 0.20  | 0.26   | 0.11  | 0.21  | -0.67                 | 0.00026 | 0.02341 | 1.75     | 0.93  | 1.33  | 2.85                       | 1.73  | 1.44  | -0.07 |   |   |                       |   |   |        |   |   |
| RPneg_437.10007_10.871 | RP    | neg        | 10.871          | 437.1001   |            | 4    |          | 0.02814   | 0.28685                                 | 0.50  | 0.38  | 0.60   | 0.23  | 1.33  | 0.06                  | 0.94373 | 0.99197 | -0.02    | -0.32 | 0.62  | -0.03                      | 0.00  | -0.23 | -0.04 |   |   |                       |   |   |        |   |   |
| RPneg_437.12772_7.503  | RP    | neg        | 7.503           | 437.1277   |            | 4    |          | 0.40926   | 0.71503                                 | -0.15 | 0.01  | 0.19   | 0.09  | -0.39 | -0.04                 | 0.23999 | 0.75656 | -0.49    | -0.67 | -0.44 | -0.40                      | -0.28 | 0.43  | -0.08 |   |   |                       |   |   |        |   |   |
| RPneg_437.16043_8.169  | RP    | neg        | 8.169           | 437.1604   |            | 4    |          | 0.40686   | 0.71314                                 | -0.08 | -0.06 | 0.03   | -0.05 | 0.02  | 0.01                  | 0.90965 | 0.98698 | 0.00     | -0.03 | 0.00  | -0.03                      | 0.03  | 0.04  | 0.03  |   |   |                       |   |   |        |   |   |
| RPneg_437.1611_8.756   | RP    | neg        | 8.756           | 437.1611   |            | 4    |          | 0.73161   | 0.89102                                 | 0.05  | 0.11  | 0.15   | 0.02  | 0.15  | 0.24                  | 0.99291 | 0.99904 | -0.06    | -0.07 | -0.08 | -0.04                      | -0.05 | -0.05 | -0.05 |   |   |                       |   |   |        |   |   |
| RPneg_437.16129_8.082  | RP    | neg        | 8.082           | 437.1613   |            | 4    |          | 0.20399   | 0.54850                                 | 0.09  | 0.06  | 0.13   | 0.07  | 0.12  | 0.37                  | 0.58777 | 0.92615 | 0.08     | -0.18 | -0.14 | -0.12                      | -0.11 | 1.19  | -0.09 |   |   |                       |   |   |        |   |   |
| RPneg_437.16159_7.67   | RP    | neg        | 7.67            | 437.1616   |            | 4    |          | 0.47775   | 0.76271                                 | -0.06 | 0.01  | 0.10   | -0.02 | 0.11  | -0.13                 | 0.56839 | 0.92089 | 0.18     | 0.16  | 0.17  | 0.17                       | 0.20  | 0.19  | 0.20  |   |   |                       |   |   |        |   |   |
| RPneg_437.16199_6.992  | RP    | neg        | 6.992           | 437.1620   |            | 4    |          | 0.02584   | 0.27992                                 | -0.27 | -0.02 | -0.29  | -0.39 | -0.15 | 0.01                  | 0.26980 | 0.78188 | -0.25    | -0.07 | 0.03  | -0.19                      | -0.20 | -0.30 | -0.33 |   |   |                       |   |   |        |   |   |
| RPpos_437.2346_4.54    | RP    | pos        | 4.54            | 437.2346   |            | 4    |          | 0.52866   | 0.79258                                 | -0.21 | -0.18 | 0.73   | 0.09  | -0.08 | 0.06                  | 0.12654 | 0.61763 | -0.43    | -0.16 | -0.42 | -0.43                      | 0.13  | 0.04  | -0.63 |   |   |                       |   |   |        |   |   |
| HILICpos_437.2494_5.64 | HILIC | pos        | 5.64            | 437.2494   |            | 4    |          | 0.33243   | 0.65636                                 | -0.24 | -0.10 | 0.34   | 0.07  | 0.08  | -1.09                 | 0.01267 | 0.24103 | 0.38     | -0.22 | 0.20  | 1.22                       | 0.48  | 0.03  | 0.12  |   |   |                       |   |   |        |   |   |
| HILICpos_437.2818_0.51 | HILIC | pos        | 0.51            | 437.2818   |            | 4    |          | 0.26936   | 0.60535                                 | -0.32 | -0.10 | 0.71   | -0.39 | -0.45 | 0.46                  | 0.59227 | 0.92666 | -0.22    | -0.16 | -0.01 | -0.16                      | 0.01  | -0.36 | -0.38 |   |   |                       |   |   |        |   |   |
| RPneg_437.2829_7.55    | RP    | neg        | 7.55            | 437.2829   |            | 4    |          | 0.56749   | 0.81268                                 | -0.19 | 0.02  | 1.05   | -0.28 | -0.26 | 0.75                  | 0.30475 | 0.80494 | -0.32    | -0.29 | -0.07 | -0.31                      | -0.15 | -0.26 | -0.46 |   |   |                       |   |   |        |   |   |
| RPneg_437.28452_10.89  | RP    | neg        | 10.89           | 437.2845   |            | 4    |          | 0.00539   | 0.14495                                 | -0.64 | -0.04 | -0.27  | 0.36  | 1.52  | -0.31                 | 0.60567 | 0.92920 | 0.05     | 0.16  | 0.01  | 0.18                       | 0.21  | -0.13 | -0.19 |   |   |                       |   |   |        |   |   |
| RPneg_437.28479_13.056 | RP    | neg        | 13.056          | 437.2848   |            | 4    |          | 0.02793   | 0.84252                                 | 0.13  | 0.24  | -0.38  | 0.71  | 0.19  | -0.62                 | 0.79020 | 0.98713 | 0.01     | 0.25  | 0.04  | 0.44                       | -0.34 | -0.16 | -0.29 |   |   |                       |   |   |        |   |   |
| RPneg_437.28934_9.014  | RP    | neg        | 9.014           | 437.2893   |            | 4    |          | 0.02028   | 0.25830                                 | 0.79  | 0.63  | 1.11   | 0.61  | 0.57  | 2.26                  | 0.47416 | 0.89262 | -0.18    | -0.26 | -0.26 | -0.23                      | -0.24 | 0.08  | -0.10 |   |   |                       |   |   |        |   |   |
| HILICneg_437.2895_0.47 | HILIC | neg        | 0.47            | 437.2895   |            | 4    |          | 0.03600   | 0.31053                                 | 0.35  | 0.66  | 0.49   | 0.20  | 0.58  | -0.11                 | 0.03522 | 0.38399 | 0.76     | -0.09 | 0.46  | 0.93                       | 1.30  | 1.24  | 1.23  |   |   |                       |   |   |        |   |   |
| RPneg_437.29004_9.765  | RP    | neg        | 9.765           | 437.2900   |            | 4    |          | 0.57268   | 0.81555                                 | -0.19 | 0.45  | -0.01  | -0.20 | -0.06 | -0.59                 | 0.01711 | 0.27946 | 1.44     | 0.13  | 0.76  | 1.80                       | 2.65  | 2.48  | 1.07  |   |   |                       |   |   |        |   |   |
| RPneg_437.2901_9.202   | RP    | neg        | 9.202           | 437.2901   |            | 4    |          | 0.01819   | 0.24592                                 | 0.32  | 0.58  | 0.44   | 0.23  | 0.37  | 0.26                  | 0.71042 | 0.95280 | -0.12    | -0.46 | -0.34 | -0.26                      | 0.01  | 0.17  | 1.06  |   |   |                       |   |   |        |   |   |
| RPneg_437.29108_8.755  | RP    | neg        | 8.755           | 437.2911   |            | 4    |          | 0.37315   | 0.68884                                 | 0.10  | 0.24  | 0.21   | 0.11  | 0.21  | 0.05                  | 0.29073 | 0.79516 | -0.30    | -0.31 | -0.29 | -0.30                      | -0.31 | -0.31 | -0.18 |   |   |                       |   |   |        |   |   |
| RPneg_437.29123_9.102  | RP    | neg        | 9.102           | 437.2912   |            | 4    |          | 0.00026   | 0.03062                                 | 0.83  | 0.77  | 1.15   | 0.76  | 1.01  | 0.63                  | 0.34998 | 0.83091 | 0.45     | -0.12 | 0.39  | 0.69                       | 0.53  | 0.66  | 0.44  |   |   |                       |   |   |        |   |   |
| RPneg_437.29126_9.842  | RP    | neg        | 9.842           | 437.2913   |            | 4    |          | 0.03880   | 0.31745                                 | 0.38  | 0.60  | 0.50   | 0.28  | 0.55  | 0.25                  | 0.09804 | 0.56888 | 0.69     | -0.14 | 0.46  | 0.91                       | 1.09  | 1.15  | 1.09  |   |   |                       |   |   |        |   |   |
| RPneg_437.29129_9.49   | RP    | neg        | 9.49            | 437.2913   |            | 4    |          | 0.00195   | 0.08878                                 | 0.57  | 0.75  | 0.65   | 0.55  | 0.55  | 0.56                  | 0.85413 | 0.97829 | 0.10     | -0.32 | 0.20  | 0.11                       | 0.16  | 0.26  | -0.11 |   |   |                       |   |   |        |   |   |
| RPneg_437.29138_8.875  | RP    | neg        | 8.875           | 437.2914   |            | 4    |          | 0.56283   | 0.81062                                 | 0.05  | 0.65  | 0.13   | -0.01 | 0.10  | -0.20                 | 0.65404 | 0.94010 | 0.00     | -0.22 | -0.08 | 0.04                       | 0.07  | 0.11  | 0.27  |   |   |                       |   |   |        |   |   |
| RPneg_437.29163_9.376  | RP    | neg        | 9.376           | 437.2916   |            | 4    |          | 0.00633   | 0.15610                                 | 0.76  | 1.15  | 0.85   | 0.88  | 1.09  | -0.23                 | 0.81959 | 0.97250 | 0.03     | -0.31 | 0.04  | 0.14                       | -0.11 | 0.08  | 0.28  |   |   |                       |   |   |        |   |   |
| HILICneg_437.3279_0.4  | HILIC | neg        | 0.4             | 437.3279   |            | 4    |          | 0.02300   | 0.26893                                 | 0.80  | 0.23  | 0.52   | 0.63  | 1.68  | 0.25                  | 0.81608 | 0.97211 | 0.07     | 0.21  | -0.02 | 0.19                       | 0.03  | 0.16  | 0.00  |   |   |                       |   |   |        |   |   |
| RPneg_438.14029_11.193 | RP    | neg        | 11.193          | 438.1403   |            | 4    |          | 0.00432</ |                                         |       |       |        |       |       |                       |         |         |          |       |       |                            |       |       |       |   |   |                       |   |   |        |   |   |



| Feature_ID             | Mode  | Ionization | Average_Rt.min. | Average_Mz | Metabolite | MSMS | ID_Level | HMDB_ID  | IV-Alcohol self-administration (IV-ASA) |         |       |                       |       |       |       |         |         |          |       | IV-Alcohol clamp (IV-AC) |       |       |                       |       |         |          |         |         |       |       |        |       |         |         |         |       |       |       |       |      |      |
|------------------------|-------|------------|-----------------|------------|------------|------|----------|----------|-----------------------------------------|---------|-------|-----------------------|-------|-------|-------|---------|---------|----------|-------|--------------------------|-------|-------|-----------------------|-------|---------|----------|---------|---------|-------|-------|--------|-------|---------|---------|---------|-------|-------|-------|-------|------|------|
|                        |       |            |                 |            |            |      |          |          | Area Under the Curve (AUC)              |         |       | IV-Ghrelin or Placebo |       |       |       |         |         | Baseline |       | Post-LD                  |       |       | IV-Ghrelin or Placebo |       |         | Baseline |         | Post-AC |       |       | BRAC=0 |       |         |         |         |       |       |       |       |      |      |
|                        |       |            |                 |            |            |      |          |          | p                                       | q       | d     | d                     | d     | d     | d     | d       | d       | d        | d     | d                        | d     | d     | d                     | d     | d       | d        | d       | d       | d     | d     | d      | d     | d       | d       | d       |       |       |       |       |      |      |
|                        |       |            |                 |            |            |      |          |          | 0.62765                                 | 0.84246 | 0.16  | 0.42                  | 1.06  | 0.00  | 0.51  | 0.04    | 0.09480 | 0.56315  | 0.45  | 1.06                     | 0.63  | 0.26  | 1.06                  | 0.10  | 0.70    | 0.12057  | 0.45595 | -0.31   | -0.18 | -0.02 | 0.03   | -0.06 | -0.10   | 0.86760 | 0.98025 | 0.02  | -0.03 | -0.36 | -0.37 | 0.12 | 0.31 |
| RPneg_440.1876_0.93    | HILIC | pos        | 0.93            | 440.1876   |            | 4    |          | 0.62765  | 0.84246                                 | 0.16    | 0.42  | 1.06                  | 0.00  | 0.51  | 0.04  | 0.09480 | 0.56315 | 0.45     | 1.06  | 0.63                     | 0.26  | 1.06  | 0.10                  | 0.70  | 0.12057 | 0.45595  | -0.31   | -0.18   | -0.02 | 0.03  | -0.06  | -0.10 | 0.86760 | 0.98025 | 0.02    | -0.03 | -0.36 | -0.37 | 0.12  | 0.31 | 0.73 |
| RPneg_440.22382_12.053 | RP    | neg        | 12.053          | 440.2238   |            | 4    |          | 0.12057  | 0.45595                                 | -0.31   | -0.18 | -0.02                 | 0.03  | -0.06 | -0.10 | 0.86760 | 0.98025 | 0.02     | -0.03 | -0.36                    | -0.37 | 0.12  | 0.31                  | 0.73  | 0.93906 | 0.99074  | 0.06    | 0.60    | 0.01  | 0.21  | -0.35  | 0.11  | 0.00    |         |         |       |       |       |       |      |      |
| RPpos_440.2659_11.58   | RP    | pos        | 11.58           | 440.2659   |            | 4    |          | 0.66005  | 0.85759                                 | -0.13   | 0.15  | 0.13                  | -0.01 | 0.07  | -0.83 | 0.93906 | 0.99074 | 0.06     | 0.60  | 0.01                     | 0.21  | -0.35 | 0.11                  | 0.00  |         |          |         |         |       |       |        |       |         |         |         |       |       |       |       |      |      |
| RPpos_440.2767_9.15    | RP    | pos        | 9.15            | 440.2767   |            | 4    |          | 0.77776  | 0.91256                                 | -0.08   | 0.00  | 0.27                  | 0.09  | 0.08  | -0.22 | 0.17383 | 0.68773 | -0.25    | -0.44 | -0.26                    | -0.36 | -0.16 | -0.04                 | 0.01  |         |          |         |         |       |       |        |       |         |         |         |       |       |       |       |      |      |
| RPpos_440.2772_10.17   | RP    | pos        | 10.17           | 440.2772   |            | 4    |          | 0.77776  | 0.91256                                 | -0.08   | 0.00  | 0.27                  | 0.09  | 0.08  | -0.22 | 0.17383 | 0.68773 | -0.25    | -0.44 | -0.26                    | -0.36 | -0.16 | -0.04                 | 0.01  |         |          |         |         |       |       |        |       |         |         |         |       |       |       |       |      |      |
| RPpos_440.3167_10.17   | RP    | pos        | 10.17           | 440.3167   |            | 4    |          | 0.33318  | 0.65597                                 | -0.52   | 0.36  | -0.39                 | -0.42 | -0.32 | -0.42 | 0.35010 | 0.83398 | -0.12    | -0.70 | 0.06                     | 0.33  | 0.17  | 0.02                  | 0.02  |         |          |         |         |       |       |        |       |         |         |         |       |       |       |       |      |      |
| RPpos_440.3167_5.93    | RP    | pos        | 5.93            | 440.3167   |            | 4    |          | 0.12540  | 0.46126                                 | 0.37    | 0.36  | 0.43                  | 1.29  | 0.33  | 0.58  | 0.42089 | 0.86873 | -0.30    | -0.25 | -0.25                    | -0.29 | -0.33 | -0.32                 | -0.27 |         |          |         |         |       |       |        |       |         |         |         |       |       |       |       |      |      |
| HILICpos_440.3211_0.41 | HILIC | pos        | 0.41            | 440.3211   |            | 4    |          | 0.71854  | 0.88527                                 | -0.07   | 0.34  | 0.38                  | 0.11  | 0.09  | -0.10 | 0.78336 | 0.96604 | -0.16    | -0.12 | 0.05                     | 0.03  | -0.04 | -0.46                 | 0.75  |         |          |         |         |       |       |        |       |         |         |         |       |       |       |       |      |      |
| RPneg_441.09799_4.708  | RP    | neg        | 4.708           | 441.0980   |            | 4    |          | 0.60927  | 0.83311                                 | -0.22   | -0.34 | 0.04                  | -0.50 | 0.25  | 0.16  | 0.20811 | 0.72383 | 0.63     | 0.31  | 0.28                     | 0.66  | 0.27  | 1.03                  | 0.83  |         |          |         |         |       |       |        |       |         |         |         |       |       |       |       |      |      |
| RPneg_441.10928_8.168  | RP    | neg        | 8.168           | 441.1093   |            | 4    |          | 0.08442  | 0.41025                                 | -0.53   | 0.16  | 0.25                  | -0.83 | 0.41  | -0.52 | 0.16534 | 0.67649 | -0.21    | 0.03  | 0.16                     | -0.13 | -0.16 | -0.56                 | -0.50 |         |          |         |         |       |       |        |       |         |         |         |       |       |       |       |      |      |
| RPneg_441.11163_6.355  | RP    | neg        | 6.355           | 441.1116   |            | 4    |          | 0.53856  | 0.79811                                 | 0.02    | -0.07 | -0.06                 | 0.06  | 0.22  | 0.13  | 0.53744 | 0.91456 | 0.03     | 0.01  | 0.09                     | 0.01  | 0.11  | -0.14                 | 0.01  |         |          |         |         |       |       |        |       |         |         |         |       |       |       |       |      |      |
| RPpos_441.1721_6.7     | RP    | pos        | 6.7             | 441.1721   |            | 4    |          | 0.55068  | 0.80400                                 | -0.21   | 0.17  | 0.52                  | 0.04  | 0.28  | 0.22  | 0.69661 | 0.95088 | -0.16    | 0.78  | 0.23                     | -0.56 | -0.24 | -0.18                 | -0.62 |         |          |         |         |       |       |        |       |         |         |         |       |       |       |       |      |      |
| RPneg_441.1774_7.48    | RP    | neg        | 7.48            | 441.1774   |            | 4    |          | 0.00860  | 0.18214                                 | 0.67    | 0.20  | 0.55                  | 0.39  | 1.46  | 0.50  | 0.20374 | 0.71972 | 0.16     | 0.11  | -0.16                    | 0.15  | 0.36  | 0.13                  | 0.68  |         |          |         |         |       |       |        |       |         |         |         |       |       |       |       |      |      |
| RPpos_441.1877_7.73    | RP    | pos        | 7.73            | 441.1877   |            | 4    |          | 0.50667  | 0.78027                                 | -0.20   | -0.16 | 0.55                  | -0.16 | -0.47 | 0.04  | 0.71224 | 0.95337 | -0.18    | -0.09 | 0.23                     | -0.65 | 0.35  | -0.36                 | -0.07 |         |          |         |         |       |       |        |       |         |         |         |       |       |       |       |      |      |
| HILICpos_441.2094_0.95 | HILIC | pos        | 0.95            | 441.2094   |            | 4    |          | 0.64110  | 0.84801                                 | -0.16   | -0.12 | 0.04                  | 0.57  | 0.30  | -0.52 | 0.61201 | 0.93054 | 0.03     | 0.06  | 0.42                     | -0.11 | -0.72 | 0.36                  | 0.14  |         |          |         |         |       |       |        |       |         |         |         |       |       |       |       |      |      |
| RPneg_441.21234_10.85  | RP    | neg        | 10.85           | 441.2123   |            | 4    |          | 0.13028  | 0.46747                                 | 0.32    | -0.03 | 0.00                  | 0.10  | 1.23  | -0.15 | 0.55685 | 0.91947 | 0.11     | 0.08  | 0.52                     | -0.18 | 0.01  | 0.24                  | -0.13 |         |          |         |         |       |       |        |       |         |         |         |       |       |       |       |      |      |
| RPneg_441.25281_12.053 | RP    | neg        | 12.053          | 441.2528   |            | 4    |          | 0.13692  | 0.47692                                 | -0.35   | 0.04  | 0.01                  | 0.17  | -0.30 | -0.04 | 0.99977 | 0.99800 | 0.01     | 0.07  | -0.34                    | -0.28 | 0.05  | 0.28                  | 0.48  |         |          |         |         |       |       |        |       |         |         |         |       |       |       |       |      |      |
| RPpos_441.2967_10.9    | RP    | pos        | 10.9            | 441.2967   |            | 4    |          | 0.06499  | 0.37491                                 | 0.44    | -0.20 | -0.14                 | 0.51  | 1.06  | 0.67  | 0.10355 | 0.58229 | -0.37    | -0.15 | -0.29                    | -0.29 | -0.53 | -0.48                 | -0.16 |         |          |         |         |       |       |        |       |         |         |         |       |       |       |       |      |      |
| RPneg_441.33731_12.015 | RP    | neg        | 12.015          | 441.3373   |            | 4    |          | 0.25891  | 0.60492                                 | 0.24    | 0.49  | 0.44                  | 0.07  | 0.70  | 0.19  | 0.49712 | 0.90072 | 0.22     | 0.70  | 0.06                     | 0.32  | 0.34  | -0.05                 | 0.31  |         |          |         |         |       |       |        |       |         |         |         |       |       |       |       |      |      |
| RPneg_441.3374_11.779  | RP    | neg        | 11.779          | 441.3374   |            | 4    |          | 0.83531  | 0.93730                                 | 0.00    | 0.39  | -0.04                 | -0.21 | 0.23  | 0.31  | 0.39959 | 0.85799 | -0.20    | -0.30 | 0.21                     | 0.34  | 0.08  | -0.20                 | -0.22 |         |          |         |         |       |       |        |       |         |         |         |       |       |       |       |      |      |
| RPneg_441.39484_11.247 | RP    | neg        | 11.247          | 441.3948   |            | 4    |          | 0.08259  | 0.40756                                 | 0.11    | 0.02  | -0.05                 | 0.16  | 0.30  | -0.19 | 0.95810 | 0.99500 | 0.00     | -0.17 | -0.12                    | 0.30  | -0.10 | 0.07                  | 0.05  |         |          |         |         |       |       |        |       |         |         |         |       |       |       |       |      |      |
| HILICneg_441.6816_3.65 | HILIC | neg        | 3.65            | 441.6816   |            | 4    |          | 0.06347  | 0.37148                                 | -0.22   | 0.09  | -0.09                 | -0.11 | -0.15 | -0.24 | 0.48826 | 0.89812 | 0.07     | 0.02  | 0.06                     | 0.01  | 0.06  | 0.15                  | 0.27  |         |          |         |         |       |       |        |       |         |         |         |       |       |       |       |      |      |
| RPpos_441.7758_7.61    | RP    | pos        | 7.61            | 441.7758   |            | 4    |          | 0.54479  | 0.80072                                 | -0.21   | 0.03  | 0.98                  | -0.37 | -0.22 | 0.92  | 0.24220 | 0.75868 | -0.34    | -0.24 | -0.05                    | -0.31 | -0.22 | -0.26                 | -0.49 |         |          |         |         |       |       |        |       |         |         |         |       |       |       |       |      |      |
| HILICneg_442.0893_0.39 | HILIC | neg        | 0.39            | 442.0893   |            | 4    |          | 0.00090  | 0.06059                                 | 1.72    | -0.13 | 0.36                  | 1.80  | 3.16  | -0.05 | 0.63599 | 0.93582 | 0.10     | -0.18 | 0.30                     | 0.01  | 0.06  | -0.08                 | 0.11  |         |          |         |         |       |       |        |       |         |         |         |       |       |       |       |      |      |
| RPneg_442.09045_11.193 | RP    | neg        | 11.193          | 442.0905   |            | 4    |          | 0.00013  | 0.02071                                 | 1.61    | 0.04  | 0.67                  | 1.38  | 2.41  | -0.14 | 0.78716 | 0.96713 | -0.09    | -0.14 | 0.14                     | -0.22 | -0.08 | -0.10                 | -0.07 |         |          |         |         |       |       |        |       |         |         |         |       |       |       |       |      |      |
| HILICneg_442.0989_1.02 | HILIC | neg        | 1.02            | 442.0989   |            | 4    |          | 1.20E-05 | 0.00600                                 | 0.71    | -0.48 | 0.79                  | 0.96  | 0.65  | 0.47  | 0.93388 | 0.98984 | 0.04     | -0.44 | -0.07                    | 0.14  | 0.36  | 0.36                  | -0.37 |         |          |         |         |       |       |        |       |         |         |         |       |       |       |       |      |      |
| HILICpos_442.1098_1.22 | HILIC | pos        | 1.22            | 442.1098   |            | 4    |          | 1.14854  | 0.49086                                 | -0.14   | -0.04 | 0.07                  | 0.30  | -0.14 | 0.48  | 0.85721 | 0.97906 | -0.03    | -0.14 | -0.27                    | 0.08  | -0.12 | 0.04                  | 0.32  |         |          |         |         |       |       |        |       |         |         |         |       |       |       |       |      |      |
| HILICneg_442.1413_4.21 | HILIC | neg        | 4.21            | 442.1413   |            | 4    |          | 0.29580  | 0.62685                                 | -0.19   | 0.25  | 0.61                  | 0.10  | -0.55 | -0.83 | 0.90399 | 0.98615 | -0.06    | -0.20 | 0.10                     | 0.16  | 0.07  | -0.28                 | -0.36 |         |          |         |         |       |       |        |       |         |         |         |       |       |       |       |      |      |
| HILICpos_442.1602_0.43 | HILIC | pos        | 0.43            | 442.1602   |            | 4    |          | 0.11246  | 0.44817                                 | 0.57    | 0.80  | 0.63                  | 0.30  | 0.93  | 0.00  | 0.14787 | 0.65122 | 0.80     | 0.73  | 0.93                     | 0.50  | 0.45  | 0.86                  | 0.46  |         |          |         |         |       |       |        |       |         |         |         |       |       |       |       |      |      |
| RPneg_442.19019_7.379  | RP    | neg        | 7.379           | 442.1902   |            | 4    |          | 0.52572  | 0.79104                                 | 0.16    | 0.47  | 0.42                  | 0.26  | 0.14  | 0.29  | 0.00893 | 0.20091 | -0.55    | -0.62 | -0.50                    | -0.28 | -0.57 | -0.60                 | -0.59 |         |          |         |         |       |       |        |       |         |         |         |       |       |       |       |      |      |
| RPneg_442.20102_10.919 | RP    | neg        | 10.919          | 442.2010   |            | 4    |          | 0.00188  | 0.08706                                 | 1.23    | -0.11 | 0.76                  | 1.43  | 2.19  | 0.26  | 0.37723 | 0.84565 | -0.29    | -0.19 | 0.23                     | -0.45 | -0.16 | -0.56                 | -0.12 |         |          |         |         |       |       |        |       |         |         |         |       |       |       |       |      |      |
| RPneg_442.20251_11.787 | RP    | neg        | 11.787          | 442.2025   |            | 4    |          | 0.72174  | 0.89633                                 | 0.19    | 0.59  | -0.18                 | 1.14  | -0.18 | 1.35  | 0.49936 | 0.90107 | 0.17     | -0.09 | -0.35                    | 0.63  | 0.88  | 1.00                  | 0.65  |         |          |         |         |       |       |        |       |         |         |         |       |       |       |       |      |      |
| RPpos_442.2142_10.07   | RP    | pos        | 10.07           | 442.2142   |            | 4    |          | 0.35546  | 0.67466                                 | 0.24    | -0.26 | 0.61                  | 0.33  | 0.62  | 0.63  | 0.77844 | 0.96555 | -0.15    | 1.33  | 0.56                     | 0.32  | 0.34  | -0.13                 | 0.08  | 1.36    |          |         |         |       |       |        |       |         |         |         |       |       |       |       |      |      |
| HILICpos_442.3011_0.41 | HILIC | pos        | 0.41            | 442.3011   |            | 4    |          | 0.93471  | 0.97659                                 | 0.07    | 0.38  | 0.40                  | 0.03  | 0.30  | 0.12  | 0.79462 | 0.96804 | -0.1     |       |                          |       |       |                       |       |         |          |         |         |       |       |        |       |         |         |         |       |       |       |       |      |      |

| Feature_ID               | Mode  | Ionization | Average_Rt.min. | Average_Mz | Metabolite | MSMS | ID_Level | HMDB_ID | IV-Alcohol self-administration (IV-ASA) |         |       |        |       |       |                       |       |         |                       |       |       |                            | IV-Alcohol clamp (IV-AC) |       |        |       |   |                       |   |   |       |  |  |  |  |
|--------------------------|-------|------------|-----------------|------------|------------|------|----------|---------|-----------------------------------------|---------|-------|--------|-------|-------|-----------------------|-------|---------|-----------------------|-------|-------|----------------------------|--------------------------|-------|--------|-------|---|-----------------------|---|---|-------|--|--|--|--|
|                          |       |            |                 |            |            |      |          |         | Area Under the Curve (AUC)              |         |       |        |       |       | IV-Ghrelin or Placebo |       |         |                       |       |       | Area Under the Curve (AUC) |                          |       |        |       |   | IV-Ghrelin or Placebo |   |   |       |  |  |  |  |
|                          |       |            |                 |            |            |      |          |         | Baseline                                |         |       | IV-ASA |       |       | Baseline              |       |         | IV-Ghrelin or Placebo |       |       | Baseline                   |                          |       | IV-ASA |       |   | Baseline              |   |   | IV-AC |  |  |  |  |
|                          |       |            |                 |            |            |      |          |         | p                                       | q       | d     | d      | d     | d     | d                     | d     | d       | p                     | q     | d     | d                          | d                        | d     | p      | q     | d | d                     | d | d |       |  |  |  |  |
| RPpos_445.2888_6.19      | RP    | pos        | 6.19            | 445.2888   |            |      | 4        |         | 0.26299                                 | 0.60018 | -0.35 | -0.03  | 0.71  | -0.27 | -0.35                 | 0.15  | 0.93462 | 0.98984               | -0.02 | -0.07 | 0.02                       | 0.40                     | 0.07  | 0.02   | -0.58 |   |                       |   |   |       |  |  |  |  |
| RPneg_445.29446_9.058    | RP    | neg        | 9.058           | 445.2945   |            |      | 4        |         | 0.00173                                 | 0.08397 | -0.55 | -0.15  | -0.33 | -0.48 | -0.28                 | -0.06 | 0.11279 | 0.59555               | -0.45 | 0.40  | -0.01                      | -1.06                    | -0.34 | -0.52  | -0.44 |   |                       |   |   |       |  |  |  |  |
| RPneg_445.29611_9.269    | RP    | neg        | 9.269           | 445.2961   |            |      | 4        |         | 0.03278                                 | 0.30196 | -0.66 | -0.57  | -0.53 | -0.51 | -0.70                 | -0.50 | 0.01585 | 0.26962               | -0.46 | -0.47 | -0.52                      | -0.60                    | -0.31 | -0.36  | -0.55 |   |                       |   |   |       |  |  |  |  |
| HILICneg_445.3329_0.39   | HILIC | neg        | 0.39            | 445.3329   |            |      | 4        |         | 0.11829                                 | 0.45423 | 0.55  | 0.19   | 0.02  | 0.65  | 1.87                  | 0.00  | 0.38475 | 0.84935               | -0.11 | 0.01  | -0.14                      | -0.15                    | -0.12 | -0.05  | -0.17 |   |                       |   |   |       |  |  |  |  |
| RPneg_445.33298_11.095   | RP    | neg        | 11.095          | 445.3330   |            |      | 4        |         | 0.15003                                 | 0.49239 | 0.13  | -0.09  | -0.38 | 0.23  | 0.67                  | 0.04  | 0.92232 | 0.98881               | -0.06 | 0.01  | 0.05                       | -0.22                    | 0.17  | -0.01  | -0.31 |   |                       |   |   |       |  |  |  |  |
| HILICneg_445.33316_0.113 | HILIC | neg        | 0.113           | 445.3332   |            |      | 4        |         | 0.20186                                 | 0.54649 | 0.38  | -0.20  | 0.74  | 0.38  | 0.54                  | 0.49  | 0.74002 | 0.5559                | -0.02 | 0.01  | -0.08                      | 0.13                     | -0.07 | 0.04   | 0.02  |   |                       |   |   |       |  |  |  |  |
| HILICpos_445.366_0.37    | HILIC | pos        | 0.37            | 445.3660   |            |      | 4        |         | 0.59181                                 | 0.82484 | -0.22 | 0.13   | 0.20  | -0.06 | 0.14                  | -0.57 | 0.69918 | 0.95138               | 0.09  | -0.10 | 0.44                       | 0.01                     | 0.52  | -0.03  | -0.39 |   |                       |   |   |       |  |  |  |  |
| RPpos_445.3668_13        | RP    | pos        | 13              | 445.3668   |            |      | 4        |         | 0.17053                                 | 0.51560 | -0.46 | -0.14  | -0.68 | 0.03  | -0.04                 | -0.43 | 0.83839 | 0.97596               | 0.06  | 0.35  | 0.47                       | -0.22                    | -0.18 | 0.17   | 0.21  |   |                       |   |   |       |  |  |  |  |
| RPpos_445.3683_11.86     | RP    | pos        | 11.86           | 445.3683   |            |      | 4        |         | 0.24633                                 | 0.58685 | -0.28 | 0.15   | 0.13  | -0.41 | -0.17                 | 0.01  | 0.93225 | 0.98984               | 0.03  | 0.05  | 0.45                       | 0.51                     | 0.46  | 0.21   | -0.31 |   |                       |   |   |       |  |  |  |  |
| RPpos_445.3685_11.16     | RP    | pos        | 11.16           | 445.3685   |            |      | 4        |         | 0.77440                                 | 0.91011 | -0.06 | 0.07   | 0.01  | 0.16  | 0.49                  | -0.49 | 0.54969 | 0.91736               | -0.11 | -0.15 | 0.08                       | -0.21                    | -0.05 | -0.21  | -0.17 |   |                       |   |   |       |  |  |  |  |
| RPpos_445.3689_12.31     | RP    | pos        | 12.31           | 445.3689   |            |      | 4        |         | 0.53871                                 | 0.79818 | -0.18 | 1.28   | 0.11  | -0.32 | 0.29                  | -0.36 | 0.91171 | 0.98721               | 0.05  | 0.08  | 0.20                       | -0.18                    | 0.26  | 0.17   | -0.24 |   |                       |   |   |       |  |  |  |  |
| RPpos_445.3689_12.25     | RP    | pos        | 12.25           | 445.3689   |            |      | 4        |         | 0.58754                                 | 0.82277 | -0.18 | 0.80   | -0.02 | -0.24 | 0.43                  | -0.25 | 0.86895 | 0.98031               | 0.04  | 0.10  | 0.08                       | 0.16                     | 0.15  | 0.12   | -0.51 |   |                       |   |   |       |  |  |  |  |
| RPneg_445.36899_11.784   | RP    | neg        | 11.784          | 445.3690   |            |      | 4        |         | 0.12659                                 | 0.46321 | -0.55 | 0.05   | -0.65 | 0.41  | -0.66                 | 0.38  | 0.13755 | 0.63663               | -0.26 | -0.75 | -0.78                      | 0.35                     | -0.18 | -0.19  | -0.35 |   |                       |   |   |       |  |  |  |  |
| RPpos_445.3986_10.97     | RP    | pos        | 10.97           | 445.3986   |            |      | 4        |         | 0.28248                                 | 0.61658 | -0.43 | -0.19  | -0.08 | -0.01 | -0.37                 | -0.53 | 0.55265 | 0.91818               | -0.28 | 1.43  | -0.27                      | 0.50                     | -0.03 | 0.19   | -0.65 |   |                       |   |   |       |  |  |  |  |
| RPpos_445.3987_11.05     | RP    | pos        | 11.05           | 445.3987   |            |      | 4        |         | 0.16270                                 | 0.50721 | -0.53 | -0.17  | -0.08 | -0.18 | -0.52                 | -0.44 | 0.51084 | 0.90555               | 0.31  | 1.52  | -0.25                      | 0.62                     | -0.02 | 0.26   | 0.67  |   |                       |   |   |       |  |  |  |  |
| RPpos_445.7677_7.13      | RP    | pos        | 7.13            | 445.7677   |            |      | 4        |         | 0.96361                                 | 0.98696 | 0.00  | 0.29   | 0.45  | 0.06  | 0.04                  | 0.96  | 0.81584 | 0.97205               | -0.10 | 0.09  | 0.04                       | 0.18                     | 0.09  | -0.62  | -0.12 |   |                       |   |   |       |  |  |  |  |
| RPpos_445.7686_7.46      | RP    | pos        | 7.46            | 445.7686   |            |      | 4        |         | 0.60063                                 | 0.82888 | -0.11 | -0.17  | 0.40  | -0.07 | -0.20                 | 0.37  | 0.97771 | 0.99726               | -0.05 | 0.07  | 0.11                       | 0.09                     | -0.26 | -0.45  | -0.11 |   |                       |   |   |       |  |  |  |  |
| HILICpos_446.0522_3.13   | HILIC | pos        | 3.13            | 446.0522   |            |      | 4        |         | 0.26103                                 | 0.59848 | -0.46 | -0.21  | -0.09 | 0.01  | -0.10                 | -0.60 | 0.72289 | 0.95590               | 0.04  | -0.03 | 0.22                       | 0.02                     | 0.00  | 0.25   | 0.18  |   |                       |   |   |       |  |  |  |  |
| HILICneg_446.0593_4.33   | HILIC | neg        | 4.33            | 446.0593   |            |      | 4        |         | 0.48906                                 | 0.95991 | 0.00  | 0.36   | 0.28  | 0.71  | 0.05                  | 0.03  | 0.26431 | 0.77648               | -0.17 | 0.13  | 0.10                       | 0.12                     | 0.34  | -0.02  | -0.02 |   |                       |   |   |       |  |  |  |  |
| RPneg_446.13205_10.85    | RP    | neg        | 10.85           | 446.1321   |            |      | 4        |         | 0.06200                                 | 0.36881 | 0.52  | -0.01  | 0.14  | 0.67  | 1.66                  | -0.08 | 0.53521 | 0.91372               | 0.15  | 0.02  | 0.36                       | 0.32                     | 0.19  | 0.25   | -0.25 |   |                       |   |   |       |  |  |  |  |
| RPpos_446.144_8.16       | RP    | pos        | 8.16            | 446.1440   |            |      | 4        |         | 0.70680                                 | 0.88027 | 0.10  | 0.15   | 0.17  | 0.15  | 0.31                  | 0.32  | 0.84889 | 0.97736               | -0.04 | 0.08  | 0.10                       | -0.16                    | 0.06  | -0.25  | -0.15 |   |                       |   |   |       |  |  |  |  |
| RPneg_446.16107_13.177   | RP    | neg        | 13.177          | 446.1611   |            |      | 4        |         | 0.47834                                 | 0.76314 | -0.16 | 0.07   | 0.17  | 0.26  | -0.07                 | -0.28 | 0.23471 | 0.75230               | -0.34 | 0.07  | -1.22                      | -0.59                    | 0.61  | -0.23  | 0.19  |   |                       |   |   |       |  |  |  |  |
| RPneg_446.18988_12.056   | RP    | neg        | 12.056          | 446.1899   |            |      | 4        |         | 0.56972                                 | 0.81383 | -0.10 | 0.02   | 0.05  | 0.11  | 0.01                  | 0.04  | 0.93227 | 0.98984               | -0.04 | -0.04 | -0.29                      | -0.45                    | -0.03 | 0.17   | 0.94  |   |                       |   |   |       |  |  |  |  |
| RPneg_446.19672_11.303   | RP    | neg        | 11.303          | 446.1967   |            |      | 4        |         | 0.90076                                 | 0.96348 | -0.07 | 0.04   | -0.05 | 1.02  | -0.64                 | 0.99  | 0.83184 | 0.97501               | -0.03 | 0.48  | -0.40                      | 0.35                     | -0.59 | 0.06   | 0.78  |   |                       |   |   |       |  |  |  |  |
| RPpos_446.2597_4.4       | RP    | pos        | 4.4             | 446.2597   |            |      | 4        |         | 0.73850                                 | 0.89449 | 0.05  | -0.16  | 0.22  | 0.25  | 0.32                  | 0.49  | 0.63641 | 0.93602               | -0.17 | -0.14 | -0.10                      | -0.19                    | -0.07 | -0.38  | -0.31 |   |                       |   |   |       |  |  |  |  |
| RPpos_446.2598_11.58     | RP    | pos        | 11.58           | 446.2598   |            |      | 4        |         | 0.59313                                 | 0.82560 | -0.15 | 0.10   | 0.15  | 0.02  | -0.04                 | -0.76 | 0.93500 | 0.98984               | 0.01  | 0.57  | -0.01                      | 0.19                     | -0.38 | -0.01  | 0.02  |   |                       |   |   |       |  |  |  |  |
| RPpos_446.2599_4.54      | RP    | pos        | 4.54            | 446.2599   |            |      | 4        |         | 0.21416                                 | 0.55663 | 0.28  | -0.02  | 0.61  | 0.32  | 0.73                  | 0.70  | 0.82796 | 0.97417               | -0.08 | -0.21 | -0.10                      | -0.10                    | 0.11  | -0.15  | -0.23 |   |                       |   |   |       |  |  |  |  |
| HILICpos_446.26_1.76     | HILIC | pos        | 1.76            | 446.2600   |            |      | 4        |         | 0.32354                                 | 0.64923 | 0.25  | -0.04  | 0.59  | 0.32  | 0.63                  | 0.43  | 0.82137 | 0.97315               | -0.09 | -0.16 | -0.02                      | 0.12                     | 0.06  | -0.22  | -0.31 |   |                       |   |   |       |  |  |  |  |
| RPneg_446.28958_8.367    | RP    | neg        | 8.367           | 446.2896   |            |      | 4        |         | 0.00468                                 | 0.13733 | 0.75  | 0.30   | 1.96  | 1.27  | 0.54                  | 0.25  | 0.00022 | 0.02102               | 1.15  | -0.15 | 1.20                       | 1.86                     | 1.07  | 1.48   | 0.03  |   |                       |   |   |       |  |  |  |  |
| RPneg_446.28992_9.037    | RP    | neg        | 9.037           | 446.2899   |            |      | 4        |         | 0.00111                                 | 0.06738 | 0.78  | 0.02   | 1.19  | 0.82  | 0.86                  | 1.09  | 0.00328 | 0.11555               | 0.63  | -0.13 | 0.68                       | 1.40                     | 0.50  | 0.59   | -0.25 |   |                       |   |   |       |  |  |  |  |
| HILICneg_446.2904_0.88   | HILIC | neg        | 0.88            | 446.2904   |            |      | 4        |         | 0.00564                                 | 0.14723 | 0.65  | 0.42   | 1.47  | 0.53  | 0.39                  | 1.06  | 0.12303 | 0.61238               | 0.65  | 0.08  | 0.71                       | 1.11                     | 0.65  | 0.54   | -0.03 |   |                       |   |   |       |  |  |  |  |
| RPneg_446.2904_8.212     | RP    | neg        | 8.212           | 446.2904   |            |      | 4        |         | 0.23060                                 | 0.57214 | 0.12  | 0.07   | 0.37  | 0.15  | 0.22                  | 0.19  | 0.53529 | 0.91373               | 0.19  | -0.10 | 0.17                       | 0.12                     | 0.34  | 0.41   | 0.06  |   |                       |   |   |       |  |  |  |  |
| RPneg_446.29047_7.773    | RP    | neg        | 7.773           | 446.2905   |            |      | 4        |         | 0.48906                                 | 0.95991 | 0.00  | 0.36   | 0.28  | 0.71  | 0.05                  | 0.03  | 0.26431 | 0.77648               | -0.17 | 0.13  | 0.10                       | 0.12                     | 0.34  | -0.02  | -0.02 |   |                       |   |   |       |  |  |  |  |
| RPneg_446.29117_8.54     | RP    | neg        | 8.54            | 446.2912   |            |      | 4        |         | 0.00112                                 | 0.06738 | 0.93  | 0.47   | 1.76  | 0.79  | 0.47                  | 2.05  | 0.09613 | 0.56553               | 0.76  | 0.17  | 0.82                       | 1.24                     | 0.75  | 0.64   | 0.02  |   |                       |   |   |       |  |  |  |  |
| RPneg_446.29144_8.841    | RP    | neg        | 8.841           | 446.2914   |            |      | 4        |         | 0.00360                                 | 0.12243 | 0.90  | 0.14   | 1.14  | 1.98  | 1.06                  | 1.12  | 0.00443 | 0.13819               | 0.63  | -0.28 | 0.91                       | 1.51                     | 0.65  | 0.51   | -0.66 |   |                       |   |   |       |  |  |  |  |
| HILICpos_446.2959_0.51   | HILIC | pos        | 0.51            | 446.2959   |            |      | 4        |         | 0.90618                                 | 0.96548 | -0.03 | -0.13  | 0.44  | 0.03  | 0.35                  | 0.39  | 0.48838 | 0.89812               | -0.26 | -0.16 | -0.17                      | -0.18                    | 0.04  | -0.50  | -0.62 |   |                       |   |   |       |  |  |  |  |
| RPpos_446.296_5.18       | RP    | pos        | 5.18            | 446.2960   |            |      | 4        |         | 0.86344                                 | 0.94900 | -0.01 | -0.13  | 0.42  | 0.10  | 0.19                  | 0.73  | 0.66199 | 0.94270               | -0.17 | 0.05  | -0.10                      | -0.02                    | -0.09 | -0.50  | -0.47 |   |                       |   |   |       |  |  |  |  |
| RPpos_446.347_10.16      | RP    | pos        | 10.16           | 446.3470   |            |      | 4        |         | 0.97730                                 | 0.99107 | 0.10  | 0.68   | 0.52  | -0.03 | 0.39                  | -0.08 | 0.36870 | 0.84006               | -0.48 | -0.31 | 0.12                       | -0.33                    | -0.09 | -0.77  | 0.02  |   |                       |   |   |       |  |  |  |  |
| RPneg_446.99368_2.636    | RP    | neg        | 2.636           | 446.9937   |            |      | 4        |         | 0.00987                                 | 0.19398 | 0.42  | 0.42   | 0.46  | 0.40  | 0.55                  | 0.69  | 0.40732 | 0.86116               | 0.06  | 0.01  | 0.03                       | 0.05                     | 0.05  | 0.04   | 0.44  |   |                       |   |   |       |  |  |  |  |
| HILICneg_446.9942_0.57   | HILIC | neg        | 0.57            | 446.9942   |            |      | 4        |         | 0.00816                                 | 0.17819 | 0.36  | 0.21   | 0.33  | 0.64  | 0.34                  | 0.63  | 0.60362 | 0.92881               | 0.03  | -0.07 | -0.03                      | -0.08                    | 0.07  | 0.06   | 0.40  |   |                       |   |   |       |  |  |  |  |
| RPneg_447.09271_5.254    | RP    | neg        | 5.254           | 447.0927   |            |      | 4        |         | 0.11965                                 | 0.45552 | 0.29  | 0.19   | 0.57  | 0.57  | 0.07                  | -0.31 | 0.28670 | 0.79355               | 0.50  | -0.07 | 0.25                       | 0.56                     | 1.08  | 0.82   | 0.12  |   |                       |   |   |       |  |  |  |  |
| HILICneg_447.0931_3.41   | HILIC | neg        | 3.41            | 447.0931   |            |      | 4        |         | 0.38809                                 | 0.70019 | 0.14  | 0.06   | 0.28  | 0.62  | -0.06                 | -0.24 | 0.04846 | 0.43981               | 1.33  | -0.05 | 0.54                       | 1.22                     | 2.12  | 1.70   | 0.25  |   |                       |   |   |       |  |  |  |  |
| RPneg_447.09341_5.179    | RP    | neg        | 5.179           | 447.0934   |            |      | 4        |         | 0.24881                                 | 0.58826 | 0.21  | 0.08   | 0.46  | 0.59  | 0.01                  | -0.17 | 0.03422 | 0.37887               | 1.16  | 0.15  | 0.57                       | 1.27                     | 1.76  | 1.60   | 0.05  |   |                       |   |   |       |  |  |  |  |
| RPpos_447.1299_7.53      | RP    | pos        | 7.53            | 447.1299   |            |      | 4        |         | 0.95528                                 | 0.98379 | -0.05 | 0.01   | 0.07  | 0.45  | 0.01                  | 0.63  | 0.07224 | 0.51271               | 0.33  | -0.11 | 0.02                       | 0.26                     | 0.47  | 0.20   | 0.79  |   |                       |   |   |       |  |  |  |  |
| RPneg_447.13397_8.799    | RP    | neg        | 8.799           | 447.1340   |            |      | 4        |         | 0.60887                                 | 0.83311 | -0.17 | -0.22  | -0.15 | 0.44  | 0.49                  | -0.22 | 0.00021 | 0.02066               | -0.29 | -0.23 | -0.67                      | -0.17                    | -0.14 | -0.27  | -0.48 |   |                       |   |   |       |  |  |  |  |
| HILICpos_447.1634_5.64   | HILIC | pos        | 5.64            | 447.1634   |            |      | 4        |         | 0.37826                                 | 0.69319 | 0.20  | 0.24   | 0.52  | 0.51  | -0.03                 | -0.17 | 0.05433 | 0.46163               | 0.41  | 0.05  | 0.81                       | 0.31                     | 0.34  | -0.01  | 0.51  |   |                       |   |   |       |  |  |  |  |
| HILICpos_447.2021_4.21   | HILIC | pos        | 4.21            | 447.2025   |            |      | 4        |         | 0.22956                                 | 0.57111 | 0.26  | 0.26   | 1.56  | 0.29  | -0.15                 | -0.47 | 0.00698 | 0.17640               | 0.81  | 0.40  | 0.98                       | 1.36                     | 0.81  | 0.54   | -0.30 |   |                       |   |   |       |  |  |  |  |
| HILICpos_447.2033_3.95   | HILIC | pos        | 3.95            | 447.2033   |            |      | 4        |         | 0.24557                                 | 0.58617 | 0.25  | 0.23   | 1.31  | 0.32  | -0.16                 | -0.43 | 0.04053 | 0.40966               | 0.82  | 0.16  | 1.29                       | 1.94                     | 0.45  | 0.33   | -0.43 |   |                       |   |   |       |  |  |  |  |
| HILICpos_447.2059_6.95   | HILIC | pos        | 6.95            | 447.2059   |            |      | 4        |         | 0.95807                                 | 0.98513 | -0.03 | 0.08   | 0.25  | 0.05  | 0.0                   |       |         |                       |       |       |                            |                          |       |        |       |   |                       |   |   |       |  |  |  |  |

| Feature_ID             | Mode  | Ionization | Average_Rt.min. | Average_Mz | Metabolite | MSMS | ID_Level | HMDB_ID | IV-Alcohol self-administration (IV-ASA) |         |       |         |       |       |                       |       |         |         |       |       | IV-Alcohol clamp (IV-AC)   |       |       |         |       |   |                       |   |   |         |   |   |
|------------------------|-------|------------|-----------------|------------|------------|------|----------|---------|-----------------------------------------|---------|-------|---------|-------|-------|-----------------------|-------|---------|---------|-------|-------|----------------------------|-------|-------|---------|-------|---|-----------------------|---|---|---------|---|---|
|                        |       |            |                 |            |            |      |          |         | Area Under the Curve (AUC)              |         |       |         |       |       | IV-Ghrelin or Placebo |       |         |         |       |       | Area Under the Curve (AUC) |       |       |         |       |   | IV-Ghrelin or Placebo |   |   |         |   |   |
|                        |       |            |                 |            |            |      |          |         | Baseline                                |         |       | Post-LD |       |       | Baseline              |       |         | Post-LD |       |       | Baseline                   |       |       | Post-LD |       |   | Baseline              |   |   | Post-LD |   |   |
|                        |       |            |                 |            |            |      |          |         | p                                       | q       | d     | d       | d     | d     | p                     | q     | d       | d       | d     | d     | p                          | q     | d     | d       | d     | d | p                     | q | d | d       | d | d |
| HILICneg_449.0462_6.17 | HILIC | neg        | 6.17            | 449.0462   |            |      | 4        |         | 0.84904                                 | 0.94348 | -0.09 | -0.08   | 0.27  | 0.16  | 0.14                  | -0.33 | 0.19752 | 0.71327 | 0.24  | 0.05  | 0.52                       | 0.81  | -0.14 | 0.22    | 0.14  |   |                       |   |   |         |   |   |
| RPpos_449.1083_5.18    | RP    | pos        | 5.18            | 449.1083   |            |      | 4        |         | 0.37710                                 | 0.69207 | 0.13  | -0.03   | 0.29  | 0.49  | -0.02                 | -0.10 | 0.06227 | 0.48560 | 1.00  | 0.19  | 0.49                       | 0.69  | 1.64  | 1.83    | 0.06  |   |                       |   |   |         |   |   |
| HILICneg_449.1204_4.21 | HILIC | neg        | 4.21            | 449.1204   |            |      | 4        |         | 0.07699                                 | 0.39797 | -0.31 | 0.18    | 0.87  | 0.03  | -0.96                 | -0.64 | 0.49311 | 0.89856 | -0.34 | -0.58 | -0.39                      | 0.69  | -0.09 | -0.85   | -0.12 |   |                       |   |   |         |   |   |
| HILICneg_449.1314_1.43 | HILIC | neg        | 1.43            | 449.1314   |            |      | 4        |         | 0.37796                                 | 0.69299 | 0.15  | 0.06    | 0.14  | 0.24  | 0.48                  | 0.11  | 0.62923 | 0.93523 | -0.06 | -0.11 | -0.04                      | -0.22 | 0.05  | 0.01    | -0.13 |   |                       |   |   |         |   |   |
| RPpos_449.1484_8.77    | RP    | pos        | 8.77            | 449.1484   |            |      | 4        |         | 0.48939                                 | 0.72718 | -0.21 | -0.08   | 0.07  | 0.08  | 0.22                  | -0.29 | 0.28289 | 0.99511 | -0.31 | -0.20 | -0.08                      | 0.06  | -0.07 | -0.40   | -0.46 |   |                       |   |   |         |   |   |
| RPneg_449.15039_8.573  | RP    | neg        | 8.573           | 449.15039  |            |      | 4        |         | 0.74501                                 | 0.86860 | -0.13 | 0.09    | 0.88  | -0.37 | -0.02                 | -0.13 | 0.32989 | 0.83048 | 0.39  | 0.37  | 0.17                       | -0.08 | 0.09  | -0.31   |       |   |                       |   |   |         |   |   |
| RPneg_449.15042_8.868  | RP    | neg        | 8.868           | 449.1504   |            |      | 4        |         | 0.85991                                 | 0.94755 | -0.07 | 0.24    | 0.96  | -0.15 | 0.00                  | -0.25 | 0.24462 | 0.76083 | -0.31 | 0.31  | -0.38                      | 0.01  | -0.02 | -0.20   | -0.31 |   |                       |   |   |         |   |   |
| RPneg_449.2139_9.079   | RP    | neg        | 9.079           | 449.2139   |            |      | 4        |         | 0.05160                                 | 0.34894 | -0.26 | 0.12    | -0.04 | -0.30 | -0.09                 | -0.08 | 0.17656 | 0.69133 | 0.11  | 0.28  | 0.18                       | -0.03 | 0.14  | 0.15    | -0.09 |   |                       |   |   |         |   |   |
| HILICpos_449.2143_0.87 | HILIC | pos        | 0.87            | 449.2143   |            |      | 4        |         | 0.26206                                 | 0.59964 | -0.28 | 0.12    | 0.34  | -0.17 | -0.50                 | -0.37 | 0.33089 | 0.82092 | 0.14  | 0.24  | 0.62                       | -0.27 | 0.53  | -0.12   | -0.09 |   |                       |   |   |         |   |   |
| HILICneg_449.2148_1.13 | HILIC | neg        | 1.13            | 449.2148   |            |      | 4        |         | 0.06606                                 | 0.37817 | -0.25 | 0.23    | -0.06 | -0.28 | -0.10                 | -0.11 | 0.11738 | 0.60205 | 0.14  | 0.25  | 0.11                       | 0.02  | 0.15  | 0.23    | -0.06 |   |                       |   |   |         |   |   |
| HILICpos_449.2149_0.45 | HILIC | pos        | 0.45            | 449.2149   |            |      | 4        |         | 0.84305                                 | 0.94119 | -0.05 | -0.22   | 0.31  | -0.05 | -0.07                 | 0.59  | 0.71826 | 0.95508 | 0.10  | 0.03  | 0.27                       | 0.34  | 0.16  | -0.64   | -0.11 |   |                       |   |   |         |   |   |
| RPpos_449.2149_5.27    | RP    | pos        | 5.27            | 449.2149   |            |      | 4        |         | 0.20201                                 | 0.54691 | -0.27 | 0.16    | 0.13  | -0.21 | -0.37                 | -0.33 | 0.42429 | 0.87041 | 0.14  | 0.35  | 0.70                       | -0.12 | 0.11  | 0.03    | -0.15 |   |                       |   |   |         |   |   |
| RPneg_449.25406_9.875  | RP    | neg        | 9.875           | 449.2541   |            |      | 4        |         | 0.08922                                 | 0.41737 | 0.27  | 0.20    | 0.36  | 0.40  | 0.55                  | 0.08  | 0.93364 | 0.98984 | 0.01  | -0.16 | -0.02                      | -0.09 | 0.15  | 0.11    | -0.04 |   |                       |   |   |         |   |   |
| RPneg_449.25452_10.078 | RP    | neg        | 10.078          | 449.2545   |            |      | 4        |         | 0.53696                                 | 0.79710 | 0.10  | 0.17    | 0.23  | 0.11  | 0.28                  | 0.05  | 0.74537 | 0.96070 | 0.01  | -0.09 | 0.02                       | -0.06 | 0.06  | 0.09    | 0.00  |   |                       |   |   |         |   |   |
| RPneg_449.255_10.001   | RP    | neg        | 10.001          | 449.2550   |            |      | 4        |         | 0.71111                                 | 0.88209 | 0.06  | 0.09    | 0.15  | 0.08  | 0.21                  | 0.06  | 0.84780 | 0.97732 | 0.11  | 0.06  | 0.09                       | 0.10  | 0.15  | 0.13    | 0.11  |   |                       |   |   |         |   |   |
| HILICneg_449.2553_1.42 | HILIC | neg        | 1.42            | 449.2553   |            |      | 4        |         | 0.85195                                 | 0.94441 | 0.07  | 0.11    | 0.16  | 0.10  | 0.23                  | 0.10  | 0.97637 | 0.99711 | 0.09  | 0.03  | 0.09                       | 0.06  | 0.15  | 0.09    | 0.10  |   |                       |   |   |         |   |   |
| RPpos_449.3603_11.53   | RP    | pos        | 11.53           | 449.3603   |            |      | 4        |         | 0.43982                                 | 0.73683 | 0.08  | 0.09    | -0.05 | 0.46  | 0.49                  | 0.45  | 0.74638 | 0.96075 | 0.01  | 0.45  | -0.12                      | -0.31 | 0.34  | 0.11    | -0.22 |   |                       |   |   |         |   |   |
| HILICneg_449.3634_0.39 | HILIC | neg        | 0.39            | 449.3634   |            |      | 4        |         | 0.14934                                 | 0.49197 | 0.68  | 0.20    | -0.01 | 1.07  | 1.88                  | 0.47  | 0.21297 | 0.72988 | -0.24 | -0.28 | -0.26                      | -0.13 | -0.32 | -0.31   | -0.07 |   |                       |   |   |         |   |   |
| RPpos_449.4354_11.52   | RP    | pos        | 11.52           | 449.4354   |            |      | 4        |         | 0.46315                                 | 0.75281 | -0.23 | -0.44   | -0.02 | 0.13  | 0.09                  | 0.20  | 0.28299 | 0.79170 | 0.41  | 0.20  | -0.01                      | 0.06  | 0.27  | 0.84    |       |   |                       |   |   |         |   |   |
| HILICneg_449.8206_0.92 | HILIC | neg        | 0.92            | 449.8206   |            |      | 4        |         | 0.20517                                 | 0.54924 | -0.39 | -0.44   | -0.17 | 0.02  | 0.23                  | -0.13 | 0.36363 | 0.7586  | -0.30 | -0.41 | -0.38                      | -0.39 | -0.18 | 0.18    |       |   |                       |   |   |         |   |   |
| HILICneg_449.9475_5.41 | HILIC | neg        | 5.41            | 449.9475   |            |      | 4        |         | 0.74215                                 | 0.89687 | 0.08  | 0.26    | 0.29  | 0.15  | 0.35                  | 0.67  | 0.29202 | 0.79632 | -0.02 | 0.31  | -0.12                      | 0.14  | 0.08  | 0.11    | -0.56 |   |                       |   |   |         |   |   |
| RPneg_450.17023_11.069 | RP    | neg        | 11.069          | 450.1702   |            |      | 4        |         | 0.03651                                 | 0.31156 | 0.91  | -0.13   | 0.14  | 0.53  | 2.06                  | 0.02  | 0.77688 | 0.96532 | -0.12 | -0.01 | -0.15                      | 0.15  | -0.27 | -0.12   | -0.02 |   |                       |   |   |         |   |   |
| HILICpos_450.1964_1.02 | HILIC | pos        | 1.02            | 450.1964   |            |      | 4        |         | 0.38123                                 | 0.69515 | 0.19  | 0.37    | 0.69  | 0.03  | 0.40                  | 0.35  | 0.10575 | 0.58354 | 0.47  | 0.35  | 0.59                       | 0.35  | 1.69  | 0.13    | -0.16 |   |                       |   |   |         |   |   |
| RPneg_450.26138_9.924  | RP    | neg        | 9.924           | 450.2614   |            |      | 4        |         | 0.42802                                 | 0.72884 | -0.14 | 0.04    | 0.01  | -0.09 | 0.00                  | 0.01  | 0.71414 | 0.95354 | 0.16  | 0.15  | 0.10                       | 0.20  | 0.24  | 0.36    | 0.39  |   |                       |   |   |         |   |   |
| RPneg_450.26151_10.062 | RP    | neg        | 10.062          | 450.2615   |            |      | 4        |         | 0.54203                                 | 0.79897 | -0.10 | 0.08    | 0.09  | -0.01 | 0.01                  | 0.06  | 0.72563 | 0.95609 | 0.16  | 0.12  | 0.11                       | 0.19  | 0.31  | 0.31    | 0.35  |   |                       |   |   |         |   |   |
| HILICneg_450.262_2.15  | HILIC | neg        | 2.15            | 450.2620   |            |      | 4        |         | 0.43105                                 | 0.73094 | -0.14 | 0.06    | 0.00  | -0.08 | -0.04                 | 0.01  | 0.76847 | 0.96344 | 0.13  | 0.13  | 0.15                       | 0.08  | 0.29  | 0.28    | 0.37  |   |                       |   |   |         |   |   |
| RPpos_450.2751_6.29    | RP    | pos        | 6.29            | 450.2751   |            |      | 4        |         | 0.37816                                 | 0.69315 | -0.31 | -0.11   | 0.79  | -0.27 | -0.21                 | 0.38  | 0.54320 | 0.91507 | -0.23 | 0.12  | 0.12                       | 0.55  | 0.35  | 0.08    | -0.54 |   |                       |   |   |         |   |   |
| RPneg_450.28592_7.768  | RP    | neg        | 7.768           | 450.2859   |            |      | 4        |         | 0.92071                                 | 0.97116 | -0.02 | 0.06    | 0.13  | 0.02  | 0.02                  | 0.01  | 0.80018 | 0.96948 | -0.03 | -0.07 | 0.01                       | -0.12 | 0.05  | 0.00    | 0.02  |   |                       |   |   |         |   |   |
| RPneg_450.29755_10.849 | RP    | neg        | 10.849          | 450.2976   |            |      | 4        |         | 0.08546                                 | 0.41134 | -0.42 | -0.07   | -0.15 | -0.55 | 0.01                  | -0.38 | 0.76705 | 0.96401 | 0.25  | 0.32  | 0.31                       | 0.58  | 0.18  | 0.13    | 0.03  |   |                       |   |   |         |   |   |
| RPneg_450.29761_10.789 | RP    | neg        | 10.789          | 450.2976   |            |      | 4        |         | 0.31884                                 | 0.64531 | -0.32 | 0.03    | -0.20 | -0.56 | 0.05                  | -0.17 | 0.37725 | 0.84565 | -0.20 | -0.20 | 0.04                       | -0.18 | -0.26 | -0.05   | -0.43 |   |                       |   |   |         |   |   |
| RPpos_450.3211_8.19    | RP    | pos        | 8.19            | 450.3211   |            |      | 4        |         | 0.04439                                 | 0.33392 | 0.35  | 0.03    | 0.99  | 0.39  | 0.53                  | 0.29  | 0.22170 | 0.73822 | 0.19  | -0.23 | 0.34                       | 0.35  | 0.21  | 0.25    | -0.31 |   |                       |   |   |         |   |   |
| RPpos_450.3212_9.31    | RP    | pos        | 9.31            | 450.3212   |            |      | 4        |         | 0.00042                                 | 0.03768 | 0.55  | 0.09    | 0.75  | 0.59  | 0.83                  | 1.15  | 0.19057 | 0.70588 | 0.60  | -0.29 | 0.82                       | 0.89  | 0.62  | 0.82    | -0.47 |   |                       |   |   |         |   |   |
| HILICpos_450.3214_1.02 | HILIC | pos        | 1.02            | 450.3214   |            |      | 4        |         | 0.00015                                 | 0.02331 | -0.23 | -0.11   | 0.92  | 0.85  | 1.25                  | 0.32  | 0.01010 | 0.21352 | 0.55  | -0.27 | 0.74                       | 1.09  | 0.50  | -0.50   |       |   |                       |   |   |         |   |   |
| RPneg_450.3578_10.91   | RP    | neg        | 10.91           | 450.3578   |            |      | 4        |         | 0.42425                                 | 0.72591 | -0.32 | -0.53   | 0.16  | -0.16 | -0.21                 | 0.51  | 0.00837 | 0.19598 | -0.49 | -0.56 | -0.60                      | -0.48 | 0.01  | -0.61   | -0.06 |   |                       |   |   |         |   |   |
| RPpos_450.3587_13.01   | RP    | pos        | 13.01           | 450.3587   |            |      | 4        |         | 0.15135                                 | 0.49367 | -0.43 | -0.25   | -0.30 | 0.75  | -0.56                 | 0.04  | 0.77020 | 0.96458 | -0.06 | 0.17  | -0.28                      | 0.39  | -0.61 | 0.26    | 0.22  |   |                       |   |   |         |   |   |
| RPpos_450.3792_9.98    | RP    | pos        | 9.98            | 450.3792   |            |      | 4        |         | 0.03504                                 | 0.30707 | -0.39 | -0.25   | -0.14 | -0.30 | -0.31                 | 0.71  | 0.55889 | 0.91988 | -0.33 | -0.20 | -0.33                      | -0.39 | 0.91  | 0.82    | -0.29 |   |                       |   |   |         |   |   |
| HILICneg_450.7657_1.45 | HILIC | neg        | 1.45            | 450.7657   |            |      | 4        |         | 0.53731                                 | 0.79723 | -0.12 | -0.07   | -0.14 | -0.14 | 0.17                  | 0.28  | 0.03942 | 0.40457 | -0.36 | -0.24 | -0.40                      | -0.56 | -0.19 | -0.40   | -0.07 |   |                       |   |   |         |   |   |
| HILICneg_450.8008_7.73 | HILIC | neg        | 7.73            | 450.8008   |            |      | 4        |         | 0.57067                                 | 0.81436 | 0.07  | 0.46    | 0.29  | -0.20 | 0.28                  | 0.03  | 0.03268 | 0.37228 | -0.48 | -0.58 | -0.62                      | -0.01 | -0.39 | -0.54   | -0.57 |   |                       |   |   |         |   |   |
| RPneg_450.92545_8.808  | RP    | neg        | 8.808           | 450.9255   |            |      | 4        |         | 0.48600                                 | 0.76807 | -0.06 | 0.04    | -0.07 | -0.01 | -0.05                 | 0.06  | 0.94507 | 0.99216 | -0.07 | -0.03 | -0.03                      | -0.03 | -0.13 | -0.07   | -0.11 |   |                       |   |   |         |   |   |
| HILICneg_451.1111_5.18 | HILIC | neg        | 5.18            | 451.1111   |            |      | 4        |         | 0.10292                                 | 0.43557 | 0.44  | 0.31    | 1.26  | 0.49  | 0.02                  | -0.10 | 0.15558 | 0.66190 | 0.72  | -0.38 | 1.20                       | 1.34  | 0.27  | 0.55    | 0.06  |   |                       |   |   |         |   |   |
| RPneg_451.11905_7.43   | RP    | neg        | 7.43            | 451.1191   |            |      | 4        |         | 0.88750                                 | 0.95880 | 0.05  | -0.02   | 0.34  | 0.20  | 0.26                  | 0.14  | 0.16843 | 0.67965 | 0.06  | -0.03 | -0.11                      | 0.06  | 0.19  | 0.28    | -0.12 |   |                       |   |   |         |   |   |
| RPneg_451.14145_6.356  | RP    | neg        | 6.356           | 451.1415   |            |      | 4        |         | 0.37856                                 | 0.69334 | 0.02  | -0.06   | 0.04  | 0.01  | 0.25                  | -0.02 | 0.33463 | 0.82286 | 0.05  | 0.05  | 0.08                       | 0.04  | 0.06  | -0.03   | 0.05  |   |                       |   |   |         |   |   |
| RPneg_451.16257_10.756 | RP    | neg        | 10.756          | 451.1626   |            |      | 4        |         | 0.02168                                 | 0.26389 | 0.89  | -0.12   | 0.20  | 0.50  | 1.96                  | -0.12 | 0.97139 | 0.99673 | -0.05 | -0.22 | 0.40                       | -0.12 | -0.23 | -0.14   | -0.09 |   |                       |   |   |         |   |   |
| RPneg_451.20795_9.079  | RP    | neg        | 9.079           | 451.2080   |            |      | 4        |         | 0.03401                                 | 0.30420 | -0.27 | 0.20    | -0.13 | -0.31 | -0.12                 | -0.01 | 0       |         |       |       |                            |       |       |         |       |   |                       |   |   |         |   |   |

| Feature_ID             | Mode  | Ionization | Average_Rt.min. | Average_Mz | Metabolite | MSMS | ID_Level | HMDB_ID | IV-Alcohol self-administration (IV-ASA) |         |       |        |       |       |                       |       |         |         |       |       | IV-Alcohol clamp (IV-AC)   |       |       |         |       |   |                       |   |   |       |   |   |
|------------------------|-------|------------|-----------------|------------|------------|------|----------|---------|-----------------------------------------|---------|-------|--------|-------|-------|-----------------------|-------|---------|---------|-------|-------|----------------------------|-------|-------|---------|-------|---|-----------------------|---|---|-------|---|---|
|                        |       |            |                 |            |            |      |          |         | Area Under the Curve (AUC)              |         |       |        |       |       | IV-Ghrelin or Placebo |       |         |         |       |       | Area Under the Curve (AUC) |       |       |         |       |   | IV-Ghrelin or Placebo |   |   |       |   |   |
|                        |       |            |                 |            |            |      |          |         | Baseline                                |         |       | IV-ASA |       |       | IV-Ghrelin            |       |         | Placebo |       |       | Baseline                   |       |       | Post-LD |       |   | IV-Ghrelin            |   |   | IV-AC |   |   |
|                        |       |            |                 |            |            |      |          |         | p                                       | q       | d     | p      | q     | d     | d                     | d     | d       | d       | d     | d     | p                          | q     | d     | d       | d     | d | d                     | d | d | d     | d | d |
| RPpos_453.1865_6.11    | RP    | pos        | 6.11            | 453.1865   |            |      | 4        |         | 0.14818                                 | 0.49037 | -0.31 | -0.15  | 0.30  | 0.09  | -0.59                 | 0.23  | 0.39142 | 0.85207 | -0.48 | -0.17 | -0.24                      | -0.88 | 0.18  | 0.00    | -0.36 |   |                       |   |   |       |   |   |
| HILICpos_453.1881_5.92 | HILIC | pos        | 5.92            | 453.1881   |            |      | 4        |         | 0.85398                                 | 0.94531 | -0.03 | 0.31   | 0.52  | 0.16  | -0.07                 | -0.41 | 0.04324 | 0.41903 | 0.34  | 0.55  | 0.63                       | 0.39  | 0.23  | 0.10    | 0.08  |   |                       |   |   |       |   |   |
| RPneg_453.19412_10.624 | RP    | neg        | 10.624          | 453.1941   |            |      | 4        |         | 0.90571                                 | 0.96548 | 0.04  | -0.08  | 0.50  | 0.70  | 0.43                  | -0.30 | 0.19707 | 0.71258 | 0.16  | 0.87  | 0.10                       | 0.06  | 0.06  | 0.04    | 0.35  |   |                       |   |   |       |   |   |
| HILICpos_453.2099_5.64 | HILIC | pos        | 5.64            | 453.2099   |            |      | 4        |         | 0.72579                                 | 0.88831 | 0.02  | 0.34   | 0.44  | 0.96  | 0.25                  | -1.01 | 0.09574 | 0.56432 | 0.32  | 0.18  | 0.13                       | 0.75  | 1.12  | -0.02   | -0.01 |   |                       |   |   |       |   |   |
| RPneg_453.23141_9.531  | RP    | neg        | 9.531           | 453.2314   |            |      | 4        |         | 0.22789                                 | 0.56289 | 0.16  | 0.39   | 0.50  | 0.28  | 0.17                  | -0.31 | 0.78995 | 0.96713 | -0.15 | -0.43 | 0.41                       | -0.14 | -0.06 | -0.11   | 0.00  |   |                       |   |   |       |   |   |
| RPneg_453.2388_7.55    | RP    | neg        | 7.55            | 453.2388   |            |      | 4        |         | 0.47752                                 | 0.76257 | -0.26 | 0.55   | 0.58  | 0.27  | 0.06                  | -0.06 | 0.50189 | 0.60271 | -0.18 | 0.52  | 0.05                       | -0.59 | 0.07  | 0.03    | -0.65 |   |                       |   |   |       |   |   |
| RPpos_453.2455_9.55    | RP    | pos        | 9.55            | 453.2455   |            |      | 4        |         | 0.98129                                 | 0.99284 | 0.06  | 0.18   | 0.52  | 0.35  | 0.14                  | -0.16 | 0.59323 | 0.92712 | -0.37 | 0.08  | -0.02                      | -0.40 | 0.10  | 0.66    | -0.06 |   |                       |   |   |       |   |   |
| RPpos_453.2457_3.71    | RP    | pos        | 3.71            | 453.2457   |            |      | 4        |         | 0.28854                                 | 0.62199 | -0.13 | -0.09  | 0.31  | -0.24 | -0.14                 | 0.23  | 0.30092 | 0.80262 | 0.47  | 0.16  | 0.25                       | 0.88  | 0.65  | 1.40    | -0.17 |   |                       |   |   |       |   |   |
| RPpos_453.2458_3.45    | RP    | pos        | 3.45            | 453.2458   |            |      | 4        |         | 0.35268                                 | 0.67238 | -0.10 | -0.09  | 0.33  | -0.17 | -0.15                 | 0.30  | 0.32777 | 0.81922 | 0.43  | 0.12  | 0.11                       | 0.98  | 0.58  | 1.29    | -0.15 |   |                       |   |   |       |   |   |
| RPneg_453.28476_9.031  | RP    | neg        | 9.031           | 453.2848   |            |      | 4        |         | 0.90359                                 | 0.96447 | 0.01  | 0.08   | 0.01  | 0.04  | 0.01                  | 0.12  | 0.29953 | 0.80176 | -0.37 | -0.58 | -0.40                      | -0.32 | -0.33 | -0.30   | -0.21 |   |                       |   |   |       |   |   |
| RPneg_453.28497_7.361  | RP    | neg        | 7.361           | 453.2850   |            |      | 4        |         | 0.82323                                 | 0.93302 | -0.02 | 0.07   | 0.10  | 0.03  | 0.04                  | -0.13 | 0.66133 | 0.94270 | -0.17 | -0.24 | -0.21                      | -0.23 | -0.08 | -0.08   | 0.07  |   |                       |   |   |       |   |   |
| RPneg_453.28528_9.226  | RP    | neg        | 9.226           | 453.2853   |            |      | 4        |         | 0.12396                                 | 0.45919 | -0.37 | -0.08  | -0.30 | -0.36 | -0.27                 | -0.59 | 0.01629 | 0.27304 | 0.49  | -0.04 | 0.34                       | 0.56  | 0.72  | 0.66    | 0.49  |   |                       |   |   |       |   |   |
| RPneg_453.28537_8.523  | RP    | neg        | 8.523           | 453.2854   |            |      | 4        |         | 0.31320                                 | 0.64120 | -0.18 | 0.02   | 0.03  | -0.11 | -0.19                 | -0.75 | 0.92426 | 0.98905 | -0.05 | -0.25 | -0.21                      | -0.06 | -0.02 | -0.02   | 0.44  |   |                       |   |   |       |   |   |
| RPneg_453.28546_8.935  | RP    | neg        | 8.935           | 453.2855   |            |      | 4        |         | 0.81486                                 | 0.92958 | -0.04 | 0.53   | 0.27  | -0.01 | -0.03                 | -0.48 | 0.04222 | 0.41565 | 0.17  | 0.02  | 0.11                       | 0.13  | 0.19  | 0.27    | 0.28  |   |                       |   |   |       |   |   |
| RPneg_453.28552_8.341  | RP    | neg        | 8.341           | 453.2855   |            |      | 4        |         | 0.01687                                 | 0.23960 | 0.60  | 0.56   | 0.90  | 0.64  | 1.05                  | -0.11 | 0.24580 | 0.76171 | 0.44  | -0.10 | 0.51                       | 0.31  | 0.62  | 0.37    | 0.82  |   |                       |   |   |       |   |   |
| RPneg_453.32202_9.833  | RP    | neg        | 9.833           | 453.3220   |            |      | 4        |         | 0.13076                                 | 0.46774 | 0.27  | 0.01   | 0.39  | 0.28  | 0.45                  | 0.73  | 0.95167 | 0.99379 | -0.04 | -0.33 | -0.16                      | -0.13 | -0.20 | 0.26    | 0.65  |   |                       |   |   |       |   |   |
| RPpos_453.3349_12.6    | RP    | pos        | 12.6            | 453.3349   |            |      | 4        |         | 0.72001                                 | 0.88592 | -0.14 | -0.11  | -0.11 | -0.13 | 0.03                  | 0.45  | 0.66290 | 0.94285 | 0.10  | 0.16  | -0.06                      | 0.26  | -0.25 | 0.29    | 0.16  |   |                       |   |   |       |   |   |
| HILICpos_453.3429_0.77 | HILIC | pos        | 0.77            | 453.3429   |            |      | 4        |         | 0.66637                                 | 0.89516 | -0.15 | 0.11   | -0.33 | 0.01  | -0.09                 | 0.24  | 0.00639 | 0.18665 | 1.34  | 0.97  | 0.34                       | -0.06 | 1.00  | 4.36    | -0.38 |   |                       |   |   |       |   |   |
| RPpos_453.3444_5.08    | RP    | pos        | 5.08            | 453.3444   |            |      | 4        |         | 0.93643                                 | 0.99872 | 0.00  | 0.16   | -0.35 | 0.28  | 0.25                  | -0.09 | 0.01396 | 0.25177 | 1.21  | 0.89  | 0.41                       | 0.02  | 0.66  | 5.57    | -0.36 |   |                       |   |   |       |   |   |
| HILICneg_453.8701_1.45 | HILIC | neg        | 1.45            | 453.8701   |            |      | 4        |         | 0.92717                                 | 0.97400 | 0.00  | 0.01   | 0.06  | 0.05  | 0.15                  | 0.17  | 0.06170 | 0.48417 | -0.32 | -0.23 | -0.33                      | 0.35  | 0.25  | 0.36    | -0.21 |   |                       |   |   |       |   |   |
| HILICneg_453.9272_5.41 | HILIC | neg        | 5.41            | 453.9272   |            |      | 4        |         | 0.50340                                 | 0.77832 | 0.17  | 0.85   | 0.33  | -0.29 | 0.62                  | 0.31  | 0.20033 | 0.71633 | 0.28  | -0.06 | -0.06                      | 0.64  | 0.90  | 0.23    | -0.39 |   |                       |   |   |       |   |   |
| RPneg_454.15033_6.992  | RP    | neg        | 6.992           | 454.1503   |            |      | 4        |         | 0.01793                                 | 0.24464 | -0.30 | -0.04  | -0.31 | -0.41 | -0.18                 | 0.06  | 0.42561 | 0.87082 | -0.19 | -0.09 | 0.00                       | -0.17 | -0.12 | -0.25   | -0.30 |   |                       |   |   |       |   |   |
| RPneg_454.1517_8.755   | RP    | neg        | 8.755           | 454.1517   |            |      | 4        |         | 0.96829                                 | 0.98830 | 0.06  | 0.09   | 0.13  | 0.09  | 0.09                  | 0.11  | 0.75103 | 0.96184 | -0.04 | 0.00  | -0.05                      | -0.10 | -0.10 | 0.12    | -0.13 |   |                       |   |   |       |   |   |
| RPneg_454.15176_8.169  | RP    | neg        | 8.169           | 454.1518   |            |      | 4        |         | 0.33321                                 | 0.65697 | -0.11 | -0.08  | 0.03  | -0.09 | 0.09                  | -0.08 | 0.83064 | 0.97473 | 0.00  | 0.01  | -0.01                      | -0.05 | 0.01  | 0.04    | 0.04  |   |                       |   |   |       |   |   |
| RPneg_454.1521_7.669   | RP    | neg        | 7.669           | 454.1521   |            |      | 4        |         | 0.49376                                 | 0.77316 | -0.07 | 0.00   | 0.02  | 0.01  | 0.10                  | -0.11 | 0.75981 | 0.96241 | 0.14  | 0.08  | 0.18                       | 0.09  | 0.15  | 0.18    | 0.13  |   |                       |   |   |       |   |   |
| RPneg_454.16556_10.666 | RP    | neg        | 10.666          | 454.1656   |            |      | 4        |         | 0.00019                                 | 0.02619 | 1.59  | -0.08  | 0.64  | 1.03  | 2.73                  | 0.06  | 0.96590 | 0.99651 | -0.04 | 0.02  | 0.41                       | -0.20 | -0.06 | -0.15   | -0.09 |   |                       |   |   |       |   |   |
| RPneg_454.20218_11.615 | RP    | neg        | 11.615          | 454.2022   |            |      | 4        |         | 0.00313                                 | 0.11530 | 1.77  | 0.13   | 0.44  | 0.85  | 3.88                  | -0.61 | 0.52552 | 0.91004 | -0.08 | 0.29  | -0.15                      | 0.14  | -0.39 | -0.01   | -0.08 |   |                       |   |   |       |   |   |
| RPneg_454.20227_11.194 | RP    | neg        | 11.194          | 454.2023   |            |      | 4        |         | 0.01416                                 | 0.22532 | 0.88  | -0.04  | 0.67  | 0.89  | 2.38                  | -0.79 | 0.87064 | 0.98076 | 0.02  | -0.24 | 0.13                       | 0.15  | -0.17 | -0.05   | 0.10  |   |                       |   |   |       |   |   |
| RPneg_454.26349_9.387  | RP    | neg        | 9.387           | 454.2635   |            |      | 4        |         | 0.00018                                 | 0.02597 | 0.81  | 0.56   | 1.06  | 1.13  | 0.84                  | -0.99 | 0.47694 | 0.89338 | 0.23  | 0.21  | 0.25                       | 0.23  | 0.33  | 0.45    | -0.12 |   |                       |   |   |       |   |   |
| HILICpos_454.2915_1.94 | HILIC | pos        | 1.94            | 454.2915   |            |      | 4        |         | 0.02850                                 | 0.28787 | -0.38 | -0.04  | -0.11 | -0.31 | -0.26                 | -0.38 | 0.49951 | 0.90107 | -0.08 | -0.05 | -0.03                      | -0.01 | 0.14  | -0.05   | -0.33 |   |                       |   |   |       |   |   |
| RPpos_454.2923_8.74    | RP    | pos        | 8.74            | 454.2923   |            |      | 4        |         | 0.08997                                 | 0.41828 | 0.10  | 0.00   | 0.24  | 0.13  | 0.11                  | 0.09  | 0.88018 | 0.98264 | 0.00  | -0.03 | -0.11                      | -0.07 | 0.08  | 0.07    | 0.14  |   |                       |   |   |       |   |   |
| RPpos_454.2932_10.3    | RP    | pos        | 10.3            | 454.2932   |            |      | 4        |         | 0.02352                                 | 0.27109 | -0.40 | -0.09  | -0.16 | -0.26 | -0.30                 | -0.37 | 0.51385 | 0.96468 | -0.09 | -0.18 | -0.11                      | 0.06  | 0.17  | -0.05   | -0.36 |   |                       |   |   |       |   |   |
| HILICpos_454.2935_1.7  | HILIC | pos        | 1.7             | 454.2935   |            |      | 4        |         | 0.02037                                 | 0.25841 | -0.33 | -0.12  | -0.05 | -0.30 | -0.27                 | -0.38 | 0.46854 | 0.88898 | -0.07 | 0.04  | 0.04                       | 0.02  | 0.15  | -0.16   | -0.37 |   |                       |   |   |       |   |   |
| RPpos_454.3287_10.21   | RP    | pos        | 10.21           | 454.3287   |            |      | 4        |         | 0.59677                                 | 0.99873 | 0.00  | 0.17   | 0.26  | 0.15  | 0.17                  | 0.13  | 0.97349 | 0.84295 | -0.20 | -0.11 | -0.17                      | -0.19 | -0.25 | 0.13    | -0.22 |   |                       |   |   |       |   |   |
| HILICpos_454.3377_0.4  | HILIC | pos        | 0.4             | 454.3377   |            |      | 4        |         | 0.78061                                 | 0.91407 | 0.02  | 0.37   | 0.51  | 0.15  | 0.09                  | -0.42 | 0.59472 | 0.92745 | -0.33 | -0.28 | 0.56                       | 0.05  | -0.56 | -0.75   | 0.57  |   |                       |   |   |       |   |   |
| RPpos_454.3894_9.78    | RP    | pos        | 9.78            | 454.3894   |            |      | 4        |         | 0.65777                                 | 0.85655 | -0.17 | 0.17   | 0.19  | -0.24 | 0.31                  | -0.49 | 0.00412 | 0.13354 | 0.72  | 0.43  | 0.75                       | 1.18  | 0.45  | 0.52    | -0.07 |   |                       |   |   |       |   |   |
| HILICneg_454.7748_3.01 | HILIC | neg        | 3.01            | 454.7748   |            |      | 4        |         | 0.08987                                 | 0.41828 | -0.62 | -0.43  | -0.24 | 0.65  | -0.44                 | 0.18  | 0.86874 | 0.98025 | -0.10 | -0.48 | 0.57                       | -0.27 | -0.16 | 0.19    | -0.40 |   |                       |   |   |       |   |   |
| HILICneg_455.045_0.5   | HILIC | neg        | 0.5             | 455.0450   |            |      | 4        |         | 0.39208                                 | 0.70265 | 0.25  | 0.02   | 0.36  | 0.41  | 0.20                  | 1.18  | 0.17862 | 0.69373 | -0.51 | -0.43 | -0.61                      | -0.39 | -0.64 | -0.42   | -0.76 |   |                       |   |   |       |   |   |
| HILICneg_455.0474_3.53 | HILIC | neg        | 3.53            | 455.0474   |            |      | 4        |         | 0.48070                                 | 0.76436 | 0.05  | 0.35   | -0.09 | 0.04  | -0.03                 | -0.30 | 0.39460 | 0.85426 | -0.08 | 0.10  | -0.16                      | -0.14 | 0.04  | -0.16   | 0.19  |   |                       |   |   |       |   |   |
| HILICpos_455.0579_5.8  | HILIC | pos        | 5.8             | 455.0579   |            |      | 4        |         | 0.49873                                 | 0.77571 | -0.24 | 0.40   | 0.78  | 0.48  | 0.06                  | -0.97 | 0.09752 | 0.56832 | 0.82  | 0.50  | 0.35                       | 1.17  | 0.93  | 0.86    | -0.09 |   |                       |   |   |       |   |   |
| HILICneg_455.1018_6.41 | HILIC | neg        | 6.41            | 455.1018   |            |      | 4        |         | 0.80659                                 | 0.92567 | 0.05  | -0.06  | 0.32  | -0.07 | 0.20                  | 1.02  | 0.23777 | 0.75266 | 0.82  | 0.24  | 0.78                       | 0.41  | 2.02  | 0.57    | -0.20 |   |                       |   |   |       |   |   |
| RPpos_455.1177_7.41    | RP    | pos        | 7.41            | 455.1177   |            |      | 4        |         | 0.30182                                 | 0.63127 | 0.14  | 0.23   | 0.28  | 0.36  | 0.28                  | -0.05 | 0.17206 | 0.68499 | 0.14  | -0.12 | 0.47                       | -0.03 | 0.43  | 0.08    | -0.39 |   |                       |   |   |       |   |   |
| RPneg_455.13736_6.557  | RP    | neg        | 6.557           | 455.1374   |            |      | 4        |         | 0.20410                                 | 0.54850 | -0.27 | -0.08  | -0.09 | 0.05  | -0.59                 | -0.26 | 0.95660 | 0.99456 | 0.02  | -0.36 | -0.26                      | -0.15 | 1.36  | -0.01   | 0.54  |   |                       |   |   |       |   |   |
| RPneg_455.16281_8.093  | RP    | neg        | 8.093           | 455.1628   |            |      | 4        |         | 0.16142                                 | 0.50526 | 0.22  | 0.07   | 0.18  | 0.35  |                       |       |         |         |       |       |                            |       |       |         |       |   |                       |   |   |       |   |   |





| Feature_ID             | Mode  | Ionization | Average Rt.min. | Average.Mz | Metabolite | MSMS | ID_Level | HMDB_ID | IV-Alcohol self-administration (IV-ASA) |         |       |       |       |       |                       |       |         |         |        |       | IV-Alcohol clamp (IV-AC)   |       |       |       |       |       |                       |  |         |  |       |  |
|------------------------|-------|------------|-----------------|------------|------------|------|----------|---------|-----------------------------------------|---------|-------|-------|-------|-------|-----------------------|-------|---------|---------|--------|-------|----------------------------|-------|-------|-------|-------|-------|-----------------------|--|---------|--|-------|--|
|                        |       |            |                 |            |            |      |          |         | Area Under the Curve (AUC)              |         |       |       |       |       | IV-Ghrelin or Placebo |       |         |         |        |       | Area Under the Curve (AUC) |       |       |       |       |       | IV-Ghrelin or Placebo |  |         |  |       |  |
|                        |       |            |                 |            |            |      |          |         | p                                       |         | q     |       | d     |       | Baseline              |       | IV-ASA  |         | BRAC=0 |       | p                          |       | q     |       | d     |       | Baseline              |  | Post-LD |  | IV-AC |  |
| HILICpos_463.214_0.51  | HILIC | pos        | 0.51            | 463.2140   |            |      | 4        |         | 0.63323                                 | 0.84443 | -0.07 | -0.07 | 0.43  | 0.13  | -0.07                 | -0.31 | 0.70074 | 0.95161 | -0.10  | -0.04 | 1.21                       | -0.27 | -0.23 | -0.23 | -0.11 | -0.11 |                       |  |         |  |       |  |
| RPpos_463.2314_9.15    | RP    | pos        | 9.15            | 463.2314   |            |      | 4        |         | 0.60766                                 | 0.83281 | -0.14 | 0.01  | -0.06 | -0.03 | -0.03                 | -0.25 | 0.48222 | 0.89578 | -0.14  | -0.11 | -0.19                      | -0.15 | -0.15 | -0.13 | -0.13 | -0.08 |                       |  |         |  |       |  |
| RPneg_463.23282_7.253  | RP    | neg        | 7.253           | 463.2328   |            |      | 4        |         | 0.18430                                 | 0.53061 | 0.01  | 0.11  | 0.19  | 0.00  | 0.05                  | -0.13 | 0.93705 | 0.99026 | -0.04  | -0.11 | 0.01                       | -0.04 | -0.05 | -0.07 | -0.07 | -0.02 |                       |  |         |  |       |  |
| RPneg_463.2334_8.127   | RP    | neg        | 8.127           | 463.2334   |            |      | 4        |         | 0.76093                                 | 0.93058 | 0.11  | -0.04 | 0.43  | 0.18  | 0.18                  | -0.01 | 0.57326 | 0.92425 | 0.05   | -0.11 | 0.07                       | 0.07  | 0.21  | 0.21  | 0.02  | -0.05 |                       |  |         |  |       |  |
| RPneg_463.23413_7.792  | RP    | neg        | 7.792           | 463.2341   |            |      | 4        |         | 0.00751                                 | 0.16993 | 0.50  | 0.13  | 0.44  | 0.85  | 0.26                  | 1.28  | 0.32733 | 0.3446  | -0.02  | -0.26 | -0.35                      | 0.16  | 0.36  | 0.40  | -0.20 | -0.20 |                       |  |         |  |       |  |
| RPneg_463.2343_8.04    | RP    | neg        | 8.04            | 463.2343   |            |      | 4        |         | 0.04186                                 | 0.23361 | 0.00  | 0.13  | 0.42  | 0.61  | 0.71                  | 0.88  | 0.00053 | 0.0054  | 0.33   | 0.09  | 0.13                       | 0.50  | 0.76  | 0.40  | 0.12  | 0.12  |                       |  |         |  |       |  |
| RPneg_463.23462_7.63   | RP    | neg        | 7.63            | 463.2346   |            |      | 4        |         | 0.01009                                 | 0.19581 | 0.36  | 0.17  | 0.61  | 0.46  | 0.51                  | 0.15  | 0.03649 | 0.38977 | 0.18   | -0.13 | 0.22                       | 0.29  | 0.40  | 0.30  | -0.30 | -0.30 |                       |  |         |  |       |  |
| RPneg_463.23489_8.539  | RP    | neg        | 8.539           | 463.2349   |            |      | 4        |         | 0.39927                                 | 0.70813 | -0.13 | 0.00  | 0.58  | 0.12  | -0.51                 | 0.56  | 0.52478 | 0.90985 | -0.38  | -0.35 | 0.08                       | 0.96  | 0.14  | -0.23 | -0.07 | -0.07 |                       |  |         |  |       |  |
| HILICpos_463.2903_1.73 | HILIC | pos        | 1.73            | 463.2903   |            |      | 4        |         | 0.87538                                 | 0.95337 | -0.08 | 0.42  | 0.74  | -0.11 | 0.12                  | -0.05 | 0.70526 | 0.95242 | -0.04  | -0.09 | 0.06                       | 0.07  | -0.12 | 0.25  | -0.38 | -0.38 |                       |  |         |  |       |  |
| RPneg_463.29129_10.425 | RP    | neg        | 10.425          | 463.2913   |            |      | 4        |         | 0.55577                                 | 0.80724 | -0.02 | 0.07  | -0.06 | 0.01  | 0.28                  | 0.23  | 0.49492 | 0.89979 | 0.17   | -1.17 | 0.25                       | -0.06 | 0.70  | 0.08  | -0.02 | -0.02 |                       |  |         |  |       |  |
| RPneg_463.29199_10.506 | RP    | neg        | 10.506          | 463.2920   |            |      | 4        |         | 0.36908                                 | 0.68548 | 0.00  | 0.36  | 0.40  | -0.20 | 0.27                  | 0.19  | 0.48333 | 0.89635 | 0.10   | -0.48 | 0.18                       | 0.01  | 0.13  | 0.10  | 0.80  | 0.80  |                       |  |         |  |       |  |
| RPneg_463.30569_9.808  | RP    | neg        | 9.808           | 463.3057   |            |      | 4        |         | 0.24593                                 | 0.58658 | 0.09  | 0.14  | 0.18  | 0.22  | 0.19                  | 0.26  | 0.37294 | 0.84231 | 0.14   | 0.35  | 0.14                       | -0.08 | 0.17  | 0.20  | 0.35  | 0.35  |                       |  |         |  |       |  |
| HILICpos_463.3248_0.41 | HILIC | pos        | 0.41            | 463.3248   |            |      | 4        |         | 0.47479                                 | 0.76084 | -0.12 | 0.02  | 0.63  | 0.13  | -0.59                 | 0.09  | 0.65312 | 0.94010 | -0.28  | 0.21  | 0.11                       | -0.19 | -0.29 | -0.49 | 0.22  | 0.22  |                       |  |         |  |       |  |
| HILICneg_463.3434_0.39 | HILIC | neg        | 0.39            | 463.3434   |            |      | 4        |         | 0.03836                                 | 0.31618 | 0.62  | 0.10  | 0.21  | 0.55  | 1.56                  | 0.27  | 0.71271 | 0.95351 | -0.08  | 0.02  | -0.15                      | -0.16 | -0.13 | 0.06  | 0.08  | 0.08  |                       |  |         |  |       |  |
| RPneg_463.34348_10.934 | RP    | neg        | 10.934          | 463.3435   |            |      | 4        |         | 0.08497                                 | 0.41107 | 0.24  | -0.11 | 0.19  | 0.30  | 0.52                  | 0.35  | 0.75968 | 0.96233 | -0.12  | -0.03 | -0.13                      | 0.14  | -0.18 | -0.19 | -0.05 | -0.05 |                       |  |         |  |       |  |
| RPpos_463.7892_7.66    | RP    | pos        | 7.66            | 463.7892   |            |      | 4        |         | 0.36397                                 | 0.68205 | -0.26 | 0.18  | 0.70  | -0.31 | -0.38                 | 0.59  | 0.05840 | 0.47527 | -0.49  | -0.30 | -0.26                      | -0.46 | -0.34 | -0.54 | -0.38 | -0.38 |                       |  |         |  |       |  |
| HILICneg_464.0969_0.52 | HILIC | neg        | 0.52            | 464.0969   |            |      | 4        |         | 0.20115                                 | 0.54584 | -0.09 | 0.08  | -0.01 | 0.19  | 0.07                  | -0.02 | 0.53246 | 0.83217 | -0.05  | -0.14 | -0.14                      | -0.05 | 0.08  | -0.01 | -0.09 | -0.09 |                       |  |         |  |       |  |
| RPneg_464.1552_7.53    | RP    | neg        | 7.53            | 464.1552   |            |      | 4        |         | 0.00043                                 | 0.03800 | 1.80  | -0.09 | 0.55  | 0.99  | 2.17                  | 0.14  | 0.92056 | 0.98868 | -0.05  | -0.05 | 0.32                       | 0.17  | 0.03  | -0.10 | -0.13 | -0.13 |                       |  |         |  |       |  |
| RPpos_464.18155_7.599  | RP    | pos        | 7.599           | 464.1816   |            |      | 4        |         | 0.74803                                 | 0.89957 | 0.09  | -0.13 | -0.20 | 1.13  | 0.25                  | 0.28  | 0.50632 | 0.90363 | 0.18   | 0.17  | -0.13                      | 0.13  | 0.33  | 0.18  | 0.58  | 0.58  |                       |  |         |  |       |  |
| RPpos_464.18155_7.599  | RP    | pos        | 7.599           | 464.1816   |            |      | 4        |         | 0.31635                                 | 0.64375 | 0.48  | 0.46  | 0.97  | 0.42  | 0.69                  | 0.39  | 0.07878 | 0.52748 | 1.09   | 0.97  | 1.24                       | 1.08  | 1.38  | 0.71  | 1.22  | 1.22  |                       |  |         |  |       |  |
| RPpos_464.1906_6.41    | RP    | pos        | 6.41            | 464.1906   |            |      | 4        |         | 0.72655                                 | 0.88852 | 0.25  | 0.29  | 0.49  | 0.42  | 0.45                  | -0.78 | 0.03317 | 0.37420 | 1.01   | 0.91  | 0.92                       | 1.04  | 1.04  | 0.91  | 1.33  | 1.33  |                       |  |         |  |       |  |
| RPpos_464.1907_6.61    | RP    | pos        | 6.61            | 464.1907   |            |      | 4        |         | 0.82896                                 | 0.93506 | 0.27  | 0.35  | 0.23  | 0.52  | 0.52                  | -0.46 | 0.11873 | 0.60441 | 0.78   | 0.79  | 0.81                       | 1.08  | 0.49  | 0.93  | 0.56  | 0.56  |                       |  |         |  |       |  |
| HILICpos_464.1912_3.34 | HILIC | pos        | 3.34            | 464.1912   |            |      | 4        |         | 0.64644                                 | 0.85064 | 0.29  | 0.32  | 0.55  | 0.44  | 0.45                  | -0.66 | 0.03377 | 0.37707 | 0.98   | 0.82  | 0.86                       | 0.98  | 1.08  | 0.95  | 1.28  | 1.28  |                       |  |         |  |       |  |
| HILICpos_464.2116_0.39 | HILIC | pos        | 0.39            | 464.2116   |            |      | 4        |         | 0.85203                                 | 0.94441 | 0.07  | 0.38  | 0.46  | -0.05 | 0.85                  | 0.45  | 0.64241 | 0.93684 | -0.34  | 1.43  | 0.19                       | -0.85 | -0.09 | 0.01  | -0.68 | -0.68 |                       |  |         |  |       |  |
| RPpos_464.2132_6.72    | RP    | pos        | 6.72            | 464.2132   |            |      | 4        |         | 0.84241                                 | 0.94097 | 0.08  | 0.39  | 1.23  | 0.00  | 0.63                  | 0.23  | 0.92788 | 0.98950 | -0.06  | 1.03  | 0.23                       | -0.36 | -0.02 | -0.09 | -0.64 | -0.64 |                       |  |         |  |       |  |
| RPneg_464.27692_10.329 | RP    | neg        | 10.329          | 464.2769   |            |      | 4        |         | 0.46949                                 | 0.75681 | -0.15 | 0.04  | 0.08  | 0.06  | 0.06                  | 0.02  | 0.82835 | 0.97425 | -0.05  | -0.12 | -0.18                      | -0.10 | 0.24  | 0.20  | -0.14 | -0.14 |                       |  |         |  |       |  |
| RPneg_464.27884_10.201 | RP    | neg        | 10.201          | 464.2788   |            |      | 4        |         | 0.59436                                 | 0.82618 | -0.10 | -0.14 | 0.21  | -0.02 | 0.20                  | -0.07 | 0.74948 | 0.96150 | 0.18   | -0.13 | 0.40                       | 0.14  | 0.71  | 0.26  | 0.14  | 0.14  |                       |  |         |  |       |  |
| RPpos_464.2837_9.42    | RP    | pos        | 9.42            | 464.2837   |            |      | 4        |         | 0.03523                                 | 0.30778 | 0.94  | 0.03  | 2.58  | 0.73  | 1.04                  | -0.03 | 0.11103 | 0.59279 | 0.91   | -0.17 | 1.99                       | 1.26  | 0.20  | 0.73  | -0.57 | -0.57 |                       |  |         |  |       |  |
| RPneg_464.30017_7.829  | RP    | neg        | 7.829           | 464.3002   |            |      | 4        |         | 0.00237                                 | 0.09991 | 0.30  | 0.00  | 0.46  | 0.28  | 0.54                  | 0.32  | 0.37396 | 0.84310 | 0.85   | 0.23  | 1.02                       | 1.03  | 0.93  | 0.96  | 0.29  | 0.29  |                       |  |         |  |       |  |
| RPneg_464.30038_6.853  | RP    | neg        | 6.853           | 464.3004   |            |      | 4        |         | 0.00372                                 | 0.12457 | 0.39  | 0.08  | 0.50  | 0.40  | 0.75                  | 0.43  | 0.89222 | 0.98433 | 0.05   | -0.26 | 0.18                       | 0.20  | 0.05  | 0.11  | -0.27 | -0.27 |                       |  |         |  |       |  |
| RPneg_464.30087_7.445  | RP    | neg        | 7.445           | 464.3009   |            |      | 4        |         | 0.00337                                 | 0.11955 | 0.28  | 0.02  | 0.38  | 0.32  | 0.51                  | 0.35  | 0.58822 | 0.97939 | 0.08   | -0.14 | 0.03                       | 0.17  | 0.17  | 0.20  | -0.18 | -0.18 |                       |  |         |  |       |  |
| RPneg_464.30139_7.964  | RP    | neg        | 7.964           | 464.3014   |            |      | 4        |         | 0.93337                                 | 0.97624 | 0.04  | -0.21 | 0.30  | 0.15  | 0.20                  | 0.04  | 0.00142 | 0.07053 | 0.37   | 0.17  | 0.52                       | 0.76  | 0.25  | 0.36  | -0.08 | -0.08 |                       |  |         |  |       |  |
| RPneg_464.30142_7.376  | RP    | neg        | 7.376           | 464.3014   |            |      | 4        |         | 0.12464                                 | 0.46015 | 0.31  | -0.02 | 0.90  | 0.46  | 0.51                  | 0.14  | 0.00075 | 0.04766 | 0.36   | 0.17  | 0.35                       | 0.52  | 0.35  | 0.34  | 0.25  | 0.25  |                       |  |         |  |       |  |
| RPneg_464.30154_8.137  | RP    | neg        | 8.137           | 464.3015   |            |      | 4        |         | 0.11423                                 | 0.45002 | -0.40 | 0.01  | -0.26 | -0.20 | -0.34                 | -0.62 | 0.18009 | 0.69493 | -0.48  | -0.51 | -0.37                      | 0.17  | -0.37 | -0.17 | 0.62  | 0.62  |                       |  |         |  |       |  |
| RPneg_464.30182_8.57   | RP    | neg        | 8.57            | 464.3018   |            |      | 4        |         | 0.04466                                 | 0.33433 | 0.68  | 0.14  | 1.16  | 0.69  | 0.82                  | 0.85  | 0.08890 | 0.55088 | 0.23   | -0.21 | 0.43                       | 0.51  | 0.24  | 0.21  | -0.38 | -0.38 |                       |  |         |  |       |  |
| RPneg_464.30182_8.212  | RP    | neg        | 8.212           | 464.3018   |            |      | 4        |         | 0.02431                                 | 0.27452 | 0.63  | 0.04  | 0.74  | 0.91  | 1.38                  | 0.84  | 0.05986 | 0.48011 | 0.14   | -0.12 | 0.44                       | 0.41  | 0.10  | -0.02 | -0.14 | -0.14 |                       |  |         |  |       |  |
| RPneg_464.30185_7.696  | RP    | neg        | 7.696           | 464.3019   |            |      | 4        |         | 0.00958                                 | 0.19089 | 0.62  | -0.11 | 1.00  | 0.93  | 1.38                  | 0.18  | 0.00607 | 0.16468 | 0.40   | 0.01  | 0.48                       | 0.66  | 0.48  | 0.36  | -0.08 | -0.08 |                       |  |         |  |       |  |
| RPneg_464.30203_7.172  | RP    | neg        | 7.172           | 464.3020   |            |      | 4        |         | 0.78207                                 | 0.91454 | 0.13  | 0.02  | 0.20  | 0.16  | 0.47                  | -0.10 | 0.55250 | 0.91809 | 0.08   | -0.01 | 0.09                       | 0.09  | 0.10  | 0.16  | -0.03 | -0.03 |                       |  |         |  |       |  |
| HILICneg_464.3021_1.89 | HILIC | neg        | 1.89            | 464.3021   |            |      | 4        |         | 0.02012                                 | 0.25756 | 0.69  | 0.03  | 0.85  | 0.97  | 1.18                  | 0.77  | 0.07649 | 0.52148 | 0.15   | -0.12 | 0.36                       | 0.37  | 0.16  | 0.02  | -0.11 | -0.11 |                       |  |         |  |       |  |
| HILICneg_464.3024_2.61 | HILIC | neg        | 2.61            | 464.3024   |            |      | 4        |         | 0.01563                                 | 0.23292 | 0.48  | -0.09 | 0.85  | 0.60  | 0.60                  | 0.81  | 0.01929 | 0.29372 | 0.33   | -0.25 | 0.46                       | 0.75  | 0.36  | 0.37  | -0.43 | -0.43 |                       |  |         |  |       |  |
| RPneg_464.30258_7.638  | RP    | neg        | 7.638           | 464.3026   |            |      | 4        |         | 0.11309                                 | 0.44905 | 0.43  | 0.41  | 0.44  | 0.09  | 1.01                  | 0.23  | 0.14486 | 0.64790 | 0.93   | 0.17  | 0.95                       | 0.63  | 0.67  | 1.42  | -0.01 | -0.01 |                       |  |         |  |       |  |
| RPneg_464.31421_11.135 | RP    | neg        | 11.135          | 464.3142   |            |      | 4        |         | 0.81451                                 | 0.92943 | 0.08  | -0.07 | 1.84  | -0.30 | -0.18                 | -0.28 | 0.86737 | 0.98025 | 0.06   | 0.16  | 0.15                       | -0.02 | 0.11  | 0.12  | -0.20 | -0.20 |                       |  |         |  |       |  |
| RPneg_464.31454_10.654 | RP    | neg        | 10.654          | 464.3145   |            |      | 4        |         | 0.01851                                 | 0.24801 | -0.44 | -0.16 | -0.12 | -0.36 | -0.29                 | -0.37 | 0.64651 | 0.93856 | 0.06   | 0.25  | 0.07                       | 0.21  | 0.08  | 0.02  | -0.22 | -0.22 |                       |  |         |  |       |  |
| RPneg_464.31482_10.809 | RP    | neg        | 10.809          | 464.3148   |            |      | 4        |         | 0.43224                                 | 0.73152 | -0.25 | 0.00  | -0.01 | -0.15 | 0.08                  | -0.39 | 0.43320 | 0.87530 | 0.37   | 0.36  | 0.33                       | 0.31  | 0.38  | 0.23  | 0.52  | 0.52  |                       |  |         |  |       |  |
| HILICneg_464.3149_1.6  | HILIC | neg        | 1.6             | 464.3149   |            |      | 4        |         | 0.02470                                 | 0.27578 | -0.41 | -0.12 | -0.24 | -0.39 | -0.22                 | -0.41 | 0.79687 | 0.96859 | 0.12   | 0.23  | 0.29                       | 0.15  | 0.05  | 0.09  | -0.19 | -0.19 |                       |  |         |  |       |  |
| RPpos_464.3727_11.08   | RP    | pos        | 11.08           | 464.3727   |            |      | 4        |         | 0.13465                                 | 0.47388 | 0.28  | 0.05  | 0.12  | 0.39  | 0.67                  | 0.32  | 0.33948 | 0.62533 | -0.12  | -0.21 | -0.10                      | -0.22 | 0.15  | -0.17 | -0.28 | -0.28 |                       |  |         |  |       |  |
| RPpos_464.3734_11      | RP    | pos        | 11              | 464.3734   |            |      | 4        |         | 0.21424                                 | 0.55674 | 0.23  | 0.06  | 0.17  | 0.53  | 0.45                  | 0.48  | 0.80950 | 0.87112 | 0.00   | 0.15  | 0.18                       | 0.13  | 0.08  | 0.01  | -0.39 | -0.39 |                       |  |         |  |       |  |
| HILICneg_464           |       |            |                 |            |            |      |          |         |                                         |         |       |       |       |       |                       |       |         |         |        |       |                            |       |       |       |       |       |                       |  |         |  |       |  |

| Feature_ID             | Mode  | Ionization | Average Rt.min. | Average Mz | Metabolite | MSMS | ID_level | HMDB_ID | IV-Alcohol self-administration (IV-ASA) |         |       |       |       |       |          |       |         |                       |       |       | IV-Alcohol clamp (IV-AC) |       |       |                            |       |         |          |         |         |         |       |       |                       |         |         |         |         |       |       |       |       |       |         |         |         |         |       |       |       |       |         |         |         |         |       |       |       |       |       |       |         |         |          |         |         |      |       |      |         |         |       |         |         |       |      |       |       |         |         |       |        |           |         |         |      |         |      |      |      |       |         |         |      |       |         |         |       |      |      |         |         |         |       |      |       |       |      |      |       |          |         |         |       |       |       |       |       |       |         |          |       |       |       |      |       |       |       |         |          |         |         |       |       |       |       |         |         |         |         |       |       |       |       |       |         |         |        |          |         |         |       |       |         |         |       |       |         |         |       |       |       |         |         |       |       |      |          |         |         |        |         |      |      |      |       |         |         |      |         |         |       |       |      |       |       |          |         |         |       |       |       |       |       |       |         |         |         |       |       |       |       |       |       |         |          |         |         |       |       |       |       |       |         |         |         |       |       |       |       |       |         |         |       |          |         |         |       |       |       |         |         |       |         |         |       |       |       |         |         |       |       |       |          |         |         |       |         |         |       |       |       |         |         |       |         |         |       |      |       |       |       |          |         |         |         |       |       |       |       |       |         |         |         |       |       |      |       |       |       |       |          |         |         |       |       |      |       |       |         |         |         |       |       |       |       |       |       |         |         |          |         |         |       |       |      |         |         |       |         |         |       |       |       |      |         |         |       |       |          |         |         |       |         |         |       |       |       |         |         |       |      |      |      |      |      |         |         |          |         |         |      |      |       |       |         |         |         |         |       |      |      |       |         |         |       |       |          |         |         |       |       |         |         |       |      |         |         |      |       |         |         |       |       |       |       |          |         |         |         |         |       |      |       |      |         |         |         |         |       |       |       |       |       |       |          |         |         |       |       |      |       |       |      |         |         |       |       |       |       |       |       |       |         |          |         |         |      |      |      |      |         |         |         |         |      |       |       |       |       |         |         |       |          |         |         |       |         |         |       |       |      |         |         |      |       |         |         |      |      |      |      |          |         |         |         |       |       |       |      |      |         |         |         |         |       |       |      |       |      |       |          |         |         |       |       |      |      |      |       |         |         |       |       |       |       |       |       |       |        |          |         |         |      |       |      |      |      |       |         |         |       |       |      |      |       |       |       |      |          |         |         |       |      |      |      |       |       |         |         |      |       |      |      |      |       |       |      |          |         |         |      |      |      |      |      |      |         |         |      |      |      |       |       |       |       |      |          |         |         |       |      |      |      |       |       |         |         |      |      |      |      |      |      |       |       |          |         |         |      |      |       |       |      |       |         |         |      |      |      |      |      |      |      |      |          |         |         |      |       |      |      |      |      |         |       |       |      |       |       |       |       |       |          |         |         |      |      |      |      |      |      |         |         |       |       |       |       |       |       |       |       |          |         |         |      |      |
|------------------------|-------|------------|-----------------|------------|------------|------|----------|---------|-----------------------------------------|---------|-------|-------|-------|-------|----------|-------|---------|-----------------------|-------|-------|--------------------------|-------|-------|----------------------------|-------|---------|----------|---------|---------|---------|-------|-------|-----------------------|---------|---------|---------|---------|-------|-------|-------|-------|-------|---------|---------|---------|---------|-------|-------|-------|-------|---------|---------|---------|---------|-------|-------|-------|-------|-------|-------|---------|---------|----------|---------|---------|------|-------|------|---------|---------|-------|---------|---------|-------|------|-------|-------|---------|---------|-------|--------|-----------|---------|---------|------|---------|------|------|------|-------|---------|---------|------|-------|---------|---------|-------|------|------|---------|---------|---------|-------|------|-------|-------|------|------|-------|----------|---------|---------|-------|-------|-------|-------|-------|-------|---------|----------|-------|-------|-------|------|-------|-------|-------|---------|----------|---------|---------|-------|-------|-------|-------|---------|---------|---------|---------|-------|-------|-------|-------|-------|---------|---------|--------|----------|---------|---------|-------|-------|---------|---------|-------|-------|---------|---------|-------|-------|-------|---------|---------|-------|-------|------|----------|---------|---------|--------|---------|------|------|------|-------|---------|---------|------|---------|---------|-------|-------|------|-------|-------|----------|---------|---------|-------|-------|-------|-------|-------|-------|---------|---------|---------|-------|-------|-------|-------|-------|-------|---------|----------|---------|---------|-------|-------|-------|-------|-------|---------|---------|---------|-------|-------|-------|-------|-------|---------|---------|-------|----------|---------|---------|-------|-------|-------|---------|---------|-------|---------|---------|-------|-------|-------|---------|---------|-------|-------|-------|----------|---------|---------|-------|---------|---------|-------|-------|-------|---------|---------|-------|---------|---------|-------|------|-------|-------|-------|----------|---------|---------|---------|-------|-------|-------|-------|-------|---------|---------|---------|-------|-------|------|-------|-------|-------|-------|----------|---------|---------|-------|-------|------|-------|-------|---------|---------|---------|-------|-------|-------|-------|-------|-------|---------|---------|----------|---------|---------|-------|-------|------|---------|---------|-------|---------|---------|-------|-------|-------|------|---------|---------|-------|-------|----------|---------|---------|-------|---------|---------|-------|-------|-------|---------|---------|-------|------|------|------|------|------|---------|---------|----------|---------|---------|------|------|-------|-------|---------|---------|---------|---------|-------|------|------|-------|---------|---------|-------|-------|----------|---------|---------|-------|-------|---------|---------|-------|------|---------|---------|------|-------|---------|---------|-------|-------|-------|-------|----------|---------|---------|---------|---------|-------|------|-------|------|---------|---------|---------|---------|-------|-------|-------|-------|-------|-------|----------|---------|---------|-------|-------|------|-------|-------|------|---------|---------|-------|-------|-------|-------|-------|-------|-------|---------|----------|---------|---------|------|------|------|------|---------|---------|---------|---------|------|-------|-------|-------|-------|---------|---------|-------|----------|---------|---------|-------|---------|---------|-------|-------|------|---------|---------|------|-------|---------|---------|------|------|------|------|----------|---------|---------|---------|-------|-------|-------|------|------|---------|---------|---------|---------|-------|-------|------|-------|------|-------|----------|---------|---------|-------|-------|------|------|------|-------|---------|---------|-------|-------|-------|-------|-------|-------|-------|--------|----------|---------|---------|------|-------|------|------|------|-------|---------|---------|-------|-------|------|------|-------|-------|-------|------|----------|---------|---------|-------|------|------|------|-------|-------|---------|---------|------|-------|------|------|------|-------|-------|------|----------|---------|---------|------|------|------|------|------|------|---------|---------|------|------|------|-------|-------|-------|-------|------|----------|---------|---------|-------|------|------|------|-------|-------|---------|---------|------|------|------|------|------|------|-------|-------|----------|---------|---------|------|------|-------|-------|------|-------|---------|---------|------|------|------|------|------|------|------|------|----------|---------|---------|------|-------|------|------|------|------|---------|-------|-------|------|-------|-------|-------|-------|-------|----------|---------|---------|------|------|------|------|------|------|---------|---------|-------|-------|-------|-------|-------|-------|-------|-------|----------|---------|---------|------|------|
|                        |       |            |                 |            |            |      |          |         | Area Under the Curve (AUC)              |         |       |       |       |       | Baseline |       |         | IV-Ghrelin or Placebo |       |       | BrAC=0                   |       |       | Area Under the Curve (AUC) |       |         | Baseline |         |         | Post-LD |       |       | IV-Ghrelin or Placebo |         |         | BrAC=0  |         |       |       |       |       |       |         |         |         |         |       |       |       |       |         |         |         |         |       |       |       |       |       |       |         |         |          |         |         |      |       |      |         |         |       |         |         |       |      |       |       |         |         |       |        |           |         |         |      |         |      |      |      |       |         |         |      |       |         |         |       |      |      |         |         |         |       |      |       |       |      |      |       |          |         |         |       |       |       |       |       |       |         |          |       |       |       |      |       |       |       |         |          |         |         |       |       |       |       |         |         |         |         |       |       |       |       |       |         |         |        |          |         |         |       |       |         |         |       |       |         |         |       |       |       |         |         |       |       |      |          |         |         |        |         |      |      |      |       |         |         |      |         |         |       |       |      |       |       |          |         |         |       |       |       |       |       |       |         |         |         |       |       |       |       |       |       |         |          |         |         |       |       |       |       |       |         |         |         |       |       |       |       |       |         |         |       |          |         |         |       |       |       |         |         |       |         |         |       |       |       |         |         |       |       |       |          |         |         |       |         |         |       |       |       |         |         |       |         |         |       |      |       |       |       |          |         |         |         |       |       |       |       |       |         |         |         |       |       |      |       |       |       |       |          |         |         |       |       |      |       |       |         |         |         |       |       |       |       |       |       |         |         |          |         |         |       |       |      |         |         |       |         |         |       |       |       |      |         |         |       |       |          |         |         |       |         |         |       |       |       |         |         |       |      |      |      |      |      |         |         |          |         |         |      |      |       |       |         |         |         |         |       |      |      |       |         |         |       |       |          |         |         |       |       |         |         |       |      |         |         |      |       |         |         |       |       |       |       |          |         |         |         |         |       |      |       |      |         |         |         |         |       |       |       |       |       |       |          |         |         |       |       |      |       |       |      |         |         |       |       |       |       |       |       |       |         |          |         |         |      |      |      |      |         |         |         |         |      |       |       |       |       |         |         |       |          |         |         |       |         |         |       |       |      |         |         |      |       |         |         |      |      |      |      |          |         |         |         |       |       |       |      |      |         |         |         |         |       |       |      |       |      |       |          |         |         |       |       |      |      |      |       |         |         |       |       |       |       |       |       |       |        |          |         |         |      |       |      |      |      |       |         |         |       |       |      |      |       |       |       |      |          |         |         |       |      |      |      |       |       |         |         |      |       |      |      |      |       |       |      |          |         |         |      |      |      |      |      |      |         |         |      |      |      |       |       |       |       |      |          |         |         |       |      |      |      |       |       |         |         |      |      |      |      |      |      |       |       |          |         |         |      |      |       |       |      |       |         |         |      |      |      |      |      |      |      |      |          |         |         |      |       |      |      |      |      |         |       |       |      |       |       |       |       |       |          |         |         |      |      |      |      |      |      |         |         |       |       |       |       |       |       |       |       |          |         |         |      |      |
|                        |       |            |                 |            |            |      |          |         | p                                       | q       | d     | d     | d     | d     | d        | d     | d       | d                     | d     | d     | d                        | d     | d     | d                          | d     | d       | d        | d       | d       | d       | d     | d     | d                     | d       | d       | d       | d       | d     | d     | d     | d     | d     | d       |         |         |         |       |       |       |       |         |         |         |         |       |       |       |       |       |       |         |         |          |         |         |      |       |      |         |         |       |         |         |       |      |       |       |         |         |       |        |           |         |         |      |         |      |      |      |       |         |         |      |       |         |         |       |      |      |         |         |         |       |      |       |       |      |      |       |          |         |         |       |       |       |       |       |       |         |          |       |       |       |      |       |       |       |         |          |         |         |       |       |       |       |         |         |         |         |       |       |       |       |       |         |         |        |          |         |         |       |       |         |         |       |       |         |         |       |       |       |         |         |       |       |      |          |         |         |        |         |      |      |      |       |         |         |      |         |         |       |       |      |       |       |          |         |         |       |       |       |       |       |       |         |         |         |       |       |       |       |       |       |         |          |         |         |       |       |       |       |       |         |         |         |       |       |       |       |       |         |         |       |          |         |         |       |       |       |         |         |       |         |         |       |       |       |         |         |       |       |       |          |         |         |       |         |         |       |       |       |         |         |       |         |         |       |      |       |       |       |          |         |         |         |       |       |       |       |       |         |         |         |       |       |      |       |       |       |       |          |         |         |       |       |      |       |       |         |         |         |       |       |       |       |       |       |         |         |          |         |         |       |       |      |         |         |       |         |         |       |       |       |      |         |         |       |       |          |         |         |       |         |         |       |       |       |         |         |       |      |      |      |      |      |         |         |          |         |         |      |      |       |       |         |         |         |         |       |      |      |       |         |         |       |       |          |         |         |       |       |         |         |       |      |         |         |      |       |         |         |       |       |       |       |          |         |         |         |         |       |      |       |      |         |         |         |         |       |       |       |       |       |       |          |         |         |       |       |      |       |       |      |         |         |       |       |       |       |       |       |       |         |          |         |         |      |      |      |      |         |         |         |         |      |       |       |       |       |         |         |       |          |         |         |       |         |         |       |       |      |         |         |      |       |         |         |      |      |      |      |          |         |         |         |       |       |       |      |      |         |         |         |         |       |       |      |       |      |       |          |         |         |       |       |      |      |      |       |         |         |       |       |       |       |       |       |       |        |          |         |         |      |       |      |      |      |       |         |         |       |       |      |      |       |       |       |      |          |         |         |       |      |      |      |       |       |         |         |      |       |      |      |      |       |       |      |          |         |         |      |      |      |      |      |      |         |         |      |      |      |       |       |       |       |      |          |         |         |       |      |      |      |       |       |         |         |      |      |      |      |      |      |       |       |          |         |         |      |      |       |       |      |       |         |         |      |      |      |      |      |      |      |      |          |         |         |      |       |      |      |      |      |         |       |       |      |       |       |       |       |       |          |         |         |      |      |      |      |      |      |         |         |       |       |       |       |       |       |       |       |          |         |         |      |      |
|                        |       |            |                 |            |            |      |          |         | 0.01541                                 | 0.23287 | -0.63 | -0.17 | -0.16 | -0.72 | -0.57    | -0.23 | 0.17441 | 0.68892               | -0.32 | -0.27 | -0.41                    | -0.27 | -0.25 | -0.53                      | -0.05 | 0.03749 | 0.31436  | -0.45   | -0.38   | -0.39   | -0.33 | -0.33 | -0.41                 | 0.19905 | 0.71482 | -0.14   | -0.06   | -0.15 | -0.09 | 0.22  | -0.23 | -0.30 | 0.60944 | 0.83316 | -0.17   | 0.16    | 0.75  | -0.05 | -0.29 | 1.22  | 0.22266 | 0.73947 | -0.35   | -0.14   | -0.13 | -0.49 | -0.49 | -0.43 | -0.25 | -0.36 | 0.02916 | 0.29025 | 0.60     | 0.05    | 0.69    | 0.81 | 1.42  | 0.78 | 0.07478 | 0.51885 | 0.12  | -0.11   | 0.39    | 0.34  | 0.10 | -0.03 | -0.12 | 0.00169 | 0.08313 | 0.31  | -0.02  | 0.45      | 0.33    | 0.55    | 0.28 | 0.38148 | 0.09 | 0.87 | 0.33 | 0.08  | 0.33    | 0.63    | 0.99 | 0.32  | 0.02204 | 0.26593 | 0.06  | 0.37 | 0.36 | 0.67    | 0.52    | 0.84041 | 0.03  | 0.37 | 0.17  | -0.05 | 0.00 | 0.19 | 0.19  | -0.23    | 0.30073 | 0.62999 | -0.29 | 0.21  | -0.04 | -0.10 | -0.27 | -0.26 | 0.60032 | 0.932810 | 0.00  | 0.17  | 0.16  | 0.01 | -0.12 | -0.04 | -0.11 | 0.05581 | 0.35822  | -0.36   | 0.17    | -0.27 | -0.44 | -0.09 | -0.68 | 0.84819 | 0.97736 | 0.12    | 0.20    | 0.12  | 0.21  | 0.19  | -0.04 | 0.12  | 0.23872 | 0.58033 | -0.13  | -0.14    | -0.01   | -0.11   | 0.25  | 0.13  | 0.56770 | 0.92089 | 0.17  | -0.02 | 0.49    | 0.08    | 0.08  | -0.06 | 0.69  | 0.87851 | 0.95461 | 0.05  | -0.10 | 0.07 | 0.09     | 0.44    | 0.19    | 0.9801 | 0.56888 | 0.20 | 0.08 | 0.04 | -0.01 | 0.48    | 0.18    | 0.43 | 0.01314 | 0.21729 | -0.52 | -0.19 | 0.16 | -0.22 | -0.68 | -0.28    | 0.44738 | 0.88074 | 0.41  | 0.04  | 0.44  | -0.29 | 0.88  | 0.19  | -0.27   | 0.46132 | 0.75191 | 0.17  | -0.19 | 0.25  | 0.32  | 0.60  | 0.50  | 0.95530 | 0.99430  | 0.02    | -0.16   | -0.01 | 0.06  | 0.10  | 0.01  | -0.19 | 0.10068 | 0.43282 | 0.60    | 0.61  | 0.52  | 0.54  | 0.86  | 0.95  | 0.54394 | 0.91520 | -0.27 | -0.23    | -0.25   | -0.18   | -0.35 | -0.33 | -0.19 | 0.18615 | 0.53294 | 0.46  | 0.02    | 1.00    | 1.23  | 0.09  | -0.27 | 0.56942 | 0.92120 | 0.17  | 0.11  | 0.14  | 0.29     | 0.39    | 0.22    | -0.28 | 0.19898 | 0.54357 | -0.41 | -0.27 | -0.25 | 0.29    | -0.27   | 0.02  | 0.92074 | 0.98863 | 0.05  | 0.60 | -0.30 | -0.30 | -0.23 | 0.39     | 0.61    | 0.09947 | 0.43066 | -0.94 | 0.20  | -0.83 | -0.09 | -0.67 | 0.59    | 0.02877 | 0.35375 | -2.07 | -0.04 | 0.25 | -1.68 | -0.91 | 0.16  | -0.90 | 0.24906  | 0.58845 | 0.28    | 0.22  | 0.23  | 1.02 | 0.52  | 0.33  | 0.98858 | 0.85750 | -0.28   | -0.57 | -0.36 | -0.04 | -0.26 | -0.26 | 0.00  | 0.04169 | 0.32591 | 1.72     | 1.58    | 2.01    | 2.38  | 2.04  | 0.06 | 0.36743 | 0.83918 | -0.12 | -0.28   | -0.16   | -0.07 | -0.11 | -0.08 | 0.04 | 0.91137 | 0.94046 | 0.01  | 0.29  | 0.38     | 0.08    | 0.07    | -0.16 | 0.71840 | 0.95515 | -0.05 | 0.05  | 0.00  | 0.07    | -0.05   | 0.07  | 0.04 | 0.08 | 0.07 | 0.00 | 0.36 | 0.56499 | 0.92065 | -0.10    | -0.03   | -0.16   | 0.04 | 0.06 | -0.14 | -0.02 | 0.56525 | 0.85595 | 0.06    | 0.18    | 0.18  | 0.08 | 0.00 | 0.36  | 0.56499 | 0.92065 | -0.10 | -0.03 | -0.16    | 0.04    | 0.06    | -0.14 | -0.02 | 0.55973 | 0.80916 | 0.07  | 0.22 | 0.22    | 0.02    | 0.13 | 0.21  | 0.71174 | 0.95326 | -0.05 | -0.12 | -0.06 | 0.02  | 0.02     | -0.06   | -0.11   | 0.55338 | 0.80553 | 0.14  | 0.15 | 0.46  | 0.10 | 0.23    | 0.73    | 0.36243 | 0.83662 | -0.19 | -0.24 | -0.09 | -0.03 | -0.30 | -0.34 | -0.29    | 0.06497 | 0.37491 | -0.49 | -0.24 | 0.36 | -0.32 | -0.44 | 0.59 | 0.10937 | 0.58992 | -0.32 | -0.39 | -0.27 | -0.40 | 0.02  | 0.04  | -0.38 | 0.22068 | 0.56303  | 0.15    | -0.16   | 0.01 | 0.76 | 0.29 | 0.08 | 0.20119 | 0.71695 | -0.18   | 0.00    | 0.07 | -0.17 | 0.04  | -0.23 | -0.50 | 0.00039 | 0.03639 | 0.82  | 1.11     | 1.02    | 1.28    | 1.10  | 0.00001 | 0.00162 | 0.45  | -0.24 | 0.65 | 0.97    | 0.43    | 0.42 | -0.44 | 0.00061 | 0.04735 | 0.58 | 0.11 | 0.73 | 0.46 | 1.11     | 1.47    | 0.15850 | 0.66663 | 0.51  | -0.25 | 0.71  | 0.87 | 0.67 | 0.48    | -0.38   | 0.00034 | 0.03040 | 0.77  | 0.10  | 1.11 | 0.87  | 1.14 | 1.03  | 0.00001  | 0.00242 | 0.40    | -0.23 | 0.63  | 0.80 | 0.39 | 0.34 | -0.41 |         |         |       |       |       |       |       |       |       |        |          |         |         |      |       |      |      |      |       |         |         |       |       |      |      |       |       |       |      |          |         |         |       |      |      |      |       |       |         |         |      |       |      |      |      |       |       |      |          |         |         |      |      |      |      |      |      |         |         |      |      |      |       |       |       |       |      |          |         |         |       |      |      |      |       |       |         |         |      |      |      |      |      |      |       |       |          |         |         |      |      |       |       |      |       |         |         |      |      |      |      |      |      |      |      |          |         |         |      |       |      |      |      |      |         |       |       |      |       |       |       |       |       |          |         |         |      |      |      |      |      |      |         |         |       |       |       |       |       |       |       |       |          |         |         |      |      |
| HILICneg_467_3732_0_39 | HILIC | neg        | 0.39            | 467.3732   |            |      | 4        |         | 0.18115                                 | 0.52687 | 0.44  | 0.14  | 0.14  | 0.42  | 1.19     | 0.02  | 0.68547 | 0.94872               | -0.09 | -0.22 | -0.21                    | 0.28  | -0.17 | -0.09                      | 0.33  | 11.045  | 467.3737 | 0.38442 | 0.69734 | 0.06    | -0.15 | 0.14  | 0.15                  | 0.24    | 0.13    | 0.49875 | 0.90096 | -0.14 | -0.31 | -0.22 | -0.30 | -0.04 | 0.09    | -0.09   | 0.63258 | 0.79153 | -0.17 | -0.03 | 0.40  | -0.08 | -0.40   | 0.26    | 0.70350 | 0.95228 | 0.04  | 0.04  | 0.11  | -0.30 | 0.11  | -0.54 | -0.19   | 6.255   | 468.3322 | 0.28325 | 0.61745 | 0.05 | -0.03 | 0.00 | 0.02    | 0.25    | -0.05 | 0.44808 | 0.89106 | -0.03 | 0.09 | 0.08  | 0.02  | 0.07    | -0.06   | -0.02 | 11.196 | 468.18262 | 0.05518 | 0.35667 | 0.68 | -0.02   | 0.60 | 0.93 | 2.28 | -0.30 | 0.47887 | 0.94718 | 0.05 | -0.23 | 0.55    | -0.18   | -0.03 | 0.08 | 0.05 | 0.76787 | 0.94718 | 0.05    | -0.23 | 0.55 | -0.18 | -0.03 | 0.08 | 0.05 | 0.923 | 468.2714 | 0.00619 | 0.15398 | -0.58 | -0.41 | -0.16 | -0.52 | -0.58 | -0.70 | 0.72659 | 0.95615  | -0.03 | -0.21 | -0.03 | 0.07 | 0.03  | 0.05  | 0.06  | 8.844   | 468.2733 | 0.05741 | 0.36131 | -0.43 | -0.18 | -0.09 | -0.41 | -0.56   | -0.52   | 0.27709 | 0.78625 | -0.20 | -0.18 | -0.03 | -0.30 | -0.12 | -0.22   | -0.24   | 10.019 | 468.2740 | 0.00736 | 0.16879 | -0.59 | -0.20 | -0.21   | -0.44   | -0.68 | -0.95 | 0.62154 | 0.93338 | -0.08 | -0.06 | -0.03 | -0.04   | 0.00    | -0.10 | -0.23 | 9.99 | 468.2947 | 0.59194 | 0.82487 | 0.05   | 0.09    | 0.13 | 0.07 | 0.19 | 0.04  | 0.87403 | 0.98176 | 0.10 | 0.15    | 0.10    | 0.05  | 0.11  | 0.10 | 0.10  | 1.36  | 468.3073 | 0.13780 | 0.47749 | -0.34 | -0.03 | -0.01 | -0.18 | -0.32 | -0.21 | 0.23250 | 0.74941 | -0.36   | -0.41 | -0.41 | -0.53 | -0.37 | -0.37 | -0.37 | 1.22    | 468.3074 | 0.13453 | 0.47369 | -0.34 | -0.07 | -0.13 | -0.23 | -0.26 | -0.09   | 0.30151 | 0.80309 | -0.30 | -0.20 | -0.57 | -0.45 | -0.50 | 0.01    | -0.26   | 9.87  | 468.3090 | 0.16540 | 0.51065 | -0.32 | -0.02 | -0.10 | -0.20   | -0.18   | -0.18 | 0.19404 | 0.70874 | -0.38 | -0.54 | -0.44 | -0.55   | -0.37   | -0.43 | -0.33 | 10.66 | 468.3095 | 0.02598 | 0.28025 | -0.51 | -0.16   | -0.26   | -0.48 | -0.33 | -0.34 | 0.32822 | 0.81944 | -0.10 | -0.04   | -0.12   | -0.17 | 0.26 | 0.03  | -0.34 | 10.59 | 468.3095 | 0.03062 | 0.29503 | -0.42   | 0.03  | -0.25 | -0.39 | -0.32 | -0.24 | 0.22503 | 0.74166 | -0.17   | -0.27 | -0.25 | 0.01 | -0.03 | -0.05 | -0.38 | 9.151 | 468.3323 | 0.14585 | 0.48681 | -0.33 | -0.21 | 0.01 | -0.42 | -0.07 | 0.14    | 0.57963 | 0.92401 | -0.18 | -0.20 | -0.29 | 0.00  | -0.04 | -0.22 | -0.22   | 0.62    | 468.3325 | 0.09841 | 0.42894 | -0.36 | -0.34 | 0.03 | -0.42   | -0.07   | 0.09  | 0.84483 | 0.97697 | -0.07 | -0.27 | -0.06 | 0.12 | 0.04    | -0.18   | -0.05 | 11.09 | 468.3453 | 0.10143 | 0.43369 | -0.28 | -0.01   | -0.18   | -0.33 | -0.03 | -0.47 | 0.95003 | 0.99346 | -0.10 | 0.12 | 0.14 | 0.22 | 0.14 | 0.10 | -0.22   | 11.17   | 468.3575 | 0.01475 | 0.23828 | 0.30 | 0.07 | 0.13  | 0.51  | 0.98    | -0.64   | 0.77841 | 0.96555 | -0.10 | 0.14 | 0.01 | -0.05 | 0.04    | -0.24   | -0.09 | 0.4   | 468.3889 | 0.21040 | 0.55349 | -0.40 | -0.42 | -0.27   | -0.13   | -0.05 | 0.19 | 0.80211 | 0.96982 | 0.11 | -0.56 | -0.41   | 0.70    | 0.57  | -0.07 | 0.20  | 10.46 | 468.3895 | 0.22957 | 0.57111 | -0.39   | -0.41   | -0.39 | 0.06 | -0.13 | 0.04 | 0.75250 | 0.96206 | -0.12   | -0.68   | -0.34 | 0.46  | -0.03 | -0.35 | 0.27  | 6.35  | 468.7249 | 0.15135 | 0.49367 | 0.31  | 0.04  | 0.71 | 0.28  | 0.36  | 0.68 | 0.98164 | 0.99572 | -0.06 | -0.16 | 0.08  | 0.04  | -0.05 | -0.19 | -0.23 | 0.57    | 469.0487 | 0.02473 | 0.27583 | 0.24 | 0.20 | 0.26 | 0.30 | 0.25    | 0.57    | 0.44824 | 0.88112 | 0.03 | -0.13 | -0.01 | 0.04  | 0.00  | 0.06    | 0.55    | 8.169 | 469.0974 | 0.56521 | 0.81171 | -0.05 | -0.04   | 0.09    | -0.10 | 0.08  | 0.08 | 0.98315 | 0.99758 | 0.01 | -0.03 | 0.04    | -0.02   | 0.04 | 0.04 | 0.02 | 7.53 | 469.1101 | 0.63071 | 0.84357 | -0.21   | -0.07 | -0.22 | -0.29 | 0.07 | 0.33 | 0.53575 | 0.91400 | 0.14    | 0.01    | -0.13 | -0.17 | 0.12 | -0.03 | 0.94 | 6.019 | 469.1352 | 0.50694 | 0.78053 | 0.22  | -0.05 | 0.39 | 0.24 | 0.35 | 0.13  | 0.21320 | 0.72988 | -0.42 | -0.53 | -0.50 | -0.12 | -0.39 | -0.31 | -0.46 | 10.757 | 469.1354 | 0.01582 | 0.23382 | 0.97 | -0.11 | 0.28 | 0.85 | 2.20 | -0.23 | 0.94362 | 0.99197 | -0.04 | -0.24 | 0.40 | 0.02 | -0.28 | -0.30 | -0.07 | 4.21 | 469.1422 | 0.49637 | 0.77411 | -0.15 | 0.13 | 0.64 | 0.10 | -0.53 | -0.76 | 0.78372 | 0.96626 | 0.01 | -0.10 | 0.07 | 0.33 | 0.24 | -0.56 | -0.05 | 6.73 | 469.1681 | 0.69673 | 0.87586 | 0.15 | 0.44 | 0.87 | 0.02 | 0.78 | 0.26 | 0.85568 | 0.97868 | 0.08 | 1.60 | 0.23 | -0.32 | -0.01 | -0.20 | -0.66 | 5.92 | 469.1845 | 0.40052 | 0.70892 | -0.13 | 0.00 | 0.37 | 0.19 | -0.18 | -0.56 | 0.00173 | 0.07883 | 0.58 | 0.77 | 0.61 | 0.52 | 0.43 | 0.51 | -0.05 | 4.562 | 469.2073 | 0.54422 | 0.80043 | 0.01 | 0.18 | -0.06 | -0.11 | 0.94 | -0.34 | 0.71444 | 0.95354 | 0.10 | 0.22 | 0.16 | 0.01 | 0.19 | 0.17 | 0.34 | 0.39 | 469.2190 | 0.04986 | 0.34518 | 0.49 | -0.07 | 0.73 | 0.33 | 0.86 | 0.09 | 0.96458 | -0.16 | -0.15 | 0.07 | -0.33 | -0.41 | -0.26 | -0.26 | 8.161 | 469.2262 | 0.00951 | 0.19024 | 0.57 | 0.34 | 0.72 | 0.54 | 0.64 | 0.94 | 0.22011 | 0.73707 | -0.07 | -0.08 | -0.09 | -0.08 | -0.07 | -0.05 | -0.03 | 8.839 | 469.2264 | 0.21217 | 0.55485 | 0.61 | 1.01 |

|                        |       |            |                 |            |            |      |          |         |                            | IV-Alcohol self-administration (IV-ASA) |       |                       |       |       |        |         |         |         |                            | IV-Alcohol clamp (IV-AC) |       |          |       |       |         |         |         |                       |       |       |        |       |       |       |   |   |   |
|------------------------|-------|------------|-----------------|------------|------------|------|----------|---------|----------------------------|-----------------------------------------|-------|-----------------------|-------|-------|--------|---------|---------|---------|----------------------------|--------------------------|-------|----------|-------|-------|---------|---------|---------|-----------------------|-------|-------|--------|-------|-------|-------|---|---|---|
| Feature_ID             | Mode  | Ionization | Average_Rt.min. | Average_Mz | Metabolite | MSMS | ID_Level | HMDB_ID | Area Under the Curve (AUC) |                                         |       |                       |       |       |        |         |         |         | Baseline                   |                          |       |          |       |       |         |         |         |                       |       |       |        |       |       |       |   |   |   |
|                        |       |            |                 |            |            |      |          |         | Area Under the Curve (AUC) |                                         |       | IV-Ghrelin or Placebo |       |       | BrAC=0 |         |         |         | Area Under the Curve (AUC) |                          |       | Baseline |       |       | Post-LD |         |         | IV-Ghrelin or Placebo |       |       | BrAC=0 |       |       |       |   |   |   |
|                        |       |            |                 |            |            |      |          |         | p                          | q                                       | d     | d                     | d     | d     | d      | d       | d       | d       | p                          | q                        | d     | d        | d     | d     | d       | d       | d       | d                     | p     | q     | d      | d     | d     | d     | d | d | d |
| HILICpos_470.3322_0.4  | HILIC | pos        | 0.4             | 470.3322   |            |      | 4        |         | 0.48976                    | 0.77100                                 | -0.12 | 0.28                  | 0.32  | -0.03 | 0.05   | -0.07   | 0.67784 | 0.94718 | -0.20                      | 0.14                     | 0.14  | -0.11    | -0.18 | -0.42 | 0.48    | 0.67784 | 0.94718 | -0.20                 | 0.14  | 0.14  | -0.11  | -0.18 | -0.42 | 0.48  |   |   |   |
| RPneg_470.3493_9.419   | RP    | neg        | 9.419           | 470.3493   |            |      | 4        |         | 0.60988                    | 0.83340                                 | -0.15 | 0.13                  | 0.30  | -0.36 | 0.37   | 0.11    | 0.00383 | 0.12787 | 0.45                       | 0.19                     | 0.34  | 0.69     | 0.87  | 0.20  | -0.08   | 0.00383 | 0.12787 | 0.45                  | 0.19  | 0.34  | 0.69   | 0.87  | 0.20  | -0.08 |   |   |   |
| HILICneg_471.0189_0.5  | HILIC | neg        | 0.5             | 471.0189   |            |      | 4        |         | 0.26584                    | 0.60223                                 | 0.29  | 0.20                  | 0.38  | 0.53  | 0.29   | 0.48    | 0.14361 | 0.64563 | -0.46                      | -0.43                    | -0.49 | -0.38    | -0.46 | -0.43 | -0.80   | 0.14361 | 0.64563 | -0.46                 | -0.43 | -0.49 | -0.38  | -0.46 | -0.43 | -0.80 |   |   |   |
| RPneg_471.15054_11.102 | RP    | neg        | 11.102          | 471.1505   |            |      | 4        |         | 0.16630                    | 0.51153                                 | -0.48 | 0.34                  | 0.03  | 0.38  | -0.46  | 0.41    | 0.39838 | 0.85719 | -0.16                      | 0.65                     | -0.12 | -0.65    | 0.07  | -0.24 | -0.56   | 0.39838 | 0.85719 | -0.16                 | 0.65  | -0.12 | -0.65  | 0.07  | -0.24 | -0.56 |   |   |   |
| HILICpos_471.1517_0.44 | HILIC | pos        | 0.44            | 471.1517   |            |      | 4        |         | 0.12949                    | 0.79363                                 | -0.13 | 0.07                  | 0.25  | -0.23 | 0.17   | 0.15570 | 0.66213 | -0.41   | -0.36                      | -0.25                    | -0.54 | -0.15    | -0.10 | -0.38 | 0.15570 | 0.66213 | -0.41   | -0.36                 | -0.25 | -0.54 | -0.15  | -0.10 | -0.38 |       |   |   |   |
| RPneg_471.1586_7.503   | RP    | neg        | 7.503           | 471.1586   |            |      | 4        |         | 0.02409                    | 0.27385                                 | 0.46  | 0.21                  | 0.50  | 0.61  | 0.68   | 0.38    | 0.00784 | 0.17953 | 0.36                       | 0.14                     | 0.13  | 0.10     | 0.61  | 0.60  | 0.09    | 0.00784 | 0.17953 | 0.36                  | 0.14  | 0.13  | 0.10   | 0.61  | 0.60  | 0.09  |   |   |   |
| RPneg_471.17825_7.075  | RP    | neg        | 7.075           | 471.1783   |            |      | 4        |         | 0.22746                    | 0.56920                                 | -0.22 | -0.10                 | 0.75  | -0.16 | -0.46  | 0.10    | 0.86427 | 0.97991 | -0.13                      | -0.28                    | -0.05 | -0.45    | 0.49  | -0.13 | -0.09   | 0.86427 | 0.97991 | -0.13                 | -0.28 | -0.05 | -0.45  | 0.49  | -0.13 | -0.09 |   |   |   |
| HILICpos_471.1955_0.86 | HILIC | pos        | 0.86            | 471.1955   |            |      | 4        |         | 0.16081                    | 0.50418                                 | -0.36 | 0.04                  | 0.13  | -0.24 | -0.55  | -0.32   | 0.37774 | 0.84565 | 0.18                       | 0.17                     | 0.81  | -0.30    | 0.39  | -0.10 | -0.01   | 0.37774 | 0.84565 | 0.18                  | 0.17  | 0.81  | -0.30  | 0.39  | -0.10 | -0.01 |   |   |   |
| RPpos_471.196_5.27     | RP    | pos        | 5.27            | 471.1960   |            |      | 4        |         | 0.07811                    | 0.40019                                 | -0.31 | 0.16                  | 0.14  | -0.27 | -0.47  | -0.32   | 0.27692 | 0.78625 | 0.19                       | 0.36                     | 0.72  | -0.18    | 0.32  | -0.10 | -0.04   | 0.27692 | 0.78625 | 0.19                  | 0.36  | 0.72  | -0.18  | 0.32  | -0.10 | -0.04 |   |   |   |
| HILICpos_471.199_5.8   | HILIC | pos        | 5.8             | 471.1990   |            |      | 4        |         | 0.89739                    | 0.96266                                 | 0.04  | 0.49                  | 0.65  | 0.50  | -0.06  | -1.00   | 0.04159 | 0.41415 | 1.01                       | 0.70                     | 1.00  | 0.82     | 0.56  | 1.31  | 0.13    | 0.04159 | 0.41415 | 1.01                  | 0.70  | 1.00  | 0.82   | 0.56  | 1.31  | 0.13  |   |   |   |
| HILICpos_471.199_5.92  | HILIC | pos        | 5.92            | 471.1990   |            |      | 4        |         | 0.78471                    | 0.91544                                 | -0.04 | 0.33                  | 0.44  | 0.29  | -0.07  | -0.50   | 0.06630 | 0.49712 | 0.47                       | 0.38                     | 0.45  | 0.46     | 0.37  | 0.77  | -0.09   | 0.06630 | 0.49712 | 0.47                  | 0.38  | 0.45  | 0.46   | 0.37  | 0.77  | -0.09 |   |   |   |
| RPpos_471.2234_4.57    | RP    | pos        | 4.57            | 471.2234   |            |      | 4        |         | 0.68135                    | 0.86772                                 | 0.03  | 0.15                  | -0.03 | -0.08 | 1.05   | -0.36   | 0.72191 | 0.95590 | 0.11                       | 0.36                     | 0.21  | 0.01     | 0.12  | 0.14  | 0.21    | 0.72191 | 0.95590 | 0.11                  | 0.36  | 0.21  | 0.01   | 0.12  | 0.14  | 0.21  |   |   |   |
| RPneg_471.24078_8.093  | RP    | neg        | 8.093           | 471.2408   |            |      | 4        |         | 0.21597                    | 0.55823                                 | 0.45  | 0.66                  | 0.61  | 0.54  | 0.77   | -0.13   | 0.24900 | 0.76555 | -0.30                      | -0.33                    | -0.31 | -0.32    | -0.29 | -0.26 | -0.25   | 0.24900 | 0.76555 | -0.30                 | -0.33 | -0.31 | -0.32  | -0.29 | -0.26 | -0.25 |   |   |   |
| RPneg_471.24112_8.447  | RP    | neg        | 8.447           | 471.2411   |            |      | 4        |         | 0.00045                    | 0.03961                                 | 0.89  | 0.71                  | 1.03  | 0.83  | 1.26   | 0.80    | 0.73211 | 0.95803 | -0.08                      | -0.17                    | -0.14 | -0.14    | 0.02  | 0.01  | 0.02    | 0.73211 | 0.95803 | -0.08                 | -0.17 | -0.14 | -0.14  | 0.02  | 0.01  | 0.02  |   |   |   |
| HILICneg_471.2415_0.67 | HILIC | neg        | 0.67            | 471.2415   |            |      | 4        |         | 0.00111                    | 0.06712                                 | 0.58  | 0.42                  | 0.65  | 0.63  | 0.76   | 0.78    | 0.31567 | 0.81238 | -0.10                      | -0.27                    | -0.22 | -0.15    | -0.04 | 0.12  | 0.02    | 0.31567 | 0.81238 | -0.10                 | -0.27 | -0.22 | -0.15  | -0.04 | 0.12  | 0.02  |   |   |   |
| RPneg_471.24182_9.523  | RP    | neg        | 9.523           | 471.2418   |            |      | 4        |         | 0.84348                    | 0.94136                                 | -0.15 | 0.82                  | 0.10  | -0.06 | -0.07  | -0.45   | 0.23939 | 0.75656 | 0.21                       | 0.76                     | 0.27  | -0.22    | 0.37  | 0.71  | 0.27    | 0.23939 | 0.75656 | 0.21                  | 0.76  | 0.27  | -0.22  | 0.37  | 0.71  | 0.27  |   |   |   |
| RPneg_471.24191_8.307  | RP    | neg        | 8.307           | 471.2419   |            |      | 4        |         | 0.75589                    | 0.90323                                 | 0.13  | 0.63                  | 0.24  | 0.12  | 0.28   | -0.26   | 0.15592 | 0.66241 | 0.11                       | -0.02                    | 0.09  | 0.06     | 0.18  | 0.07  | 0.35    | 0.15592 | 0.66241 | 0.11                  | -0.02 | 0.09  | 0.06   | 0.18  | 0.07  | 0.35  |   |   |   |
| RPneg_471.24292_9.995  | RP    | neg        | 9.995           | 471.2429   |            |      | 4        |         | 0.59755                    | 0.82755                                 | 0.01  | 0.21                  | 0.01  | -0.04 | 0.22   | -0.18   | 0.10780 | 0.58664 | 0.23                       | 0.26                     | 0.10  | 0.24     | 0.19  | 0.41  | 0.32    | 0.10780 | 0.58664 | 0.23                  | 0.26  | 0.10  | 0.24   | 0.19  | 0.41  | 0.32  |   |   |   |
| RPneg_471.24316_8.936  | RP    | neg        | 8.936           | 471.2432   |            |      | 4        |         | 0.00269                    | 0.10773                                 | 0.49  | 0.30                  | 0.60  | 0.43  | 0.28   | 0.76    | 0.28773 | 0.79407 | -0.10                      | 0.28                     | 0.23  | 0.25     | 0.13  | 0.01  | 0.06    | 0.28773 | 0.79407 | -0.10                 | 0.28  | 0.23  | 0.25   | 0.13  | 0.01  | 0.06  |   |   |   |
| HILICneg_471.2442_1.81 | HILIC | neg        | 1.81            | 471.2442   |            |      | 4        |         | 0.18373                    | 0.52989                                 | 0.45  | -0.09                 | 0.68  | 0.36  | 0.58   | 0.72    | 0.40346 | 0.85873 | -0.27                      | -0.37                    | -0.16 | -0.23    | 0.16  | -0.44 | -0.50   | 0.40346 | 0.85873 | -0.27                 | -0.37 | -0.16 | -0.23  | 0.16  | -0.44 | -0.50 |   |   |   |
| RPneg_471.24503_4.784  | RP    | neg        | 4.784           | 471.2450   |            |      | 4        |         | 0.48122                    | 0.76462                                 | 0.17  | 0.02                  | 0.52  | 0.24  | 0.45   | 0.30    | 0.58401 | 0.92465 | -0.19                      | -0.29                    | 0.03  | -0.32    | 0.04  | -0.22 | -0.47   | 0.58401 | 0.92465 | -0.19                 | -0.29 | 0.03  | -0.32  | 0.04  | -0.22 | -0.47 |   |   |   |
| RPneg_471.25931_9.153  | RP    | neg        | 9.153           | 471.2593   |            |      | 4        |         | 0.00178                    | 0.08549                                 | 0.56  | 0.17                  | 1.18  | 0.79  | 0.17   | 0.84    | 0.01244 | 0.23890 | 0.59                       | -0.14                    | 0.75  | 0.79     | 0.79  | 0.72  | 0.02    | 0.01244 | 0.23890 | 0.59                  | -0.14 | 0.75  | 0.79   | 0.79  | 0.72  | 0.02  |   |   |   |
| RPneg_471.25943_8.778  | RP    | neg        | 8.778           | 471.2594   |            |      | 4        |         | 0.01512                    | 0.23161                                 | 0.38  | 0.14                  | 0.87  | 0.84  | -0.17  | -0.04   | 0.02426 | 0.32836 | 0.81                       | 0.27                     | 0.70  | 1.50     | 1.35  | 0.55  | 0.30    | 0.02426 | 0.32836 | 0.81                  | 0.27  | 0.70  | 1.50   | 1.35  | 0.55  | 0.30  |   |   |   |
| HILICpos_471.2909_0.66 | HILIC | pos        | 0.66            | 471.2909   |            |      | 4        |         | 0.59532                    | 0.82654                                 | 0.22  | 0.02                  | 0.86  | -0.17 | 0.74   | 0.56    | 0.89876 | 0.98536 | 0.04                       | -0.41                    | 0.44  | 0.06     | -0.03 | -0.23 | 0.21    | 0.89876 | 0.98536 | 0.04                  | -0.41 | 0.44  | 0.06   | -0.03 | -0.23 | 0.21  |   |   |   |
| HILICneg_471.3473_0.39 | HILIC | neg        | 0.39            | 471.3473   |            |      | 4        |         | 0.09291                    | 0.42213                                 | 0.59  | 0.29                  | 0.32  | 0.47  | 2.22   | -0.15   | 0.89844 | 0.98533 | 0.04                       | 0.43                     | 0.37  | -0.22    | 0.03  | 0.20  | -0.09   | 0.89844 | 0.98533 | 0.04                  | 0.43  | 0.37  | -0.22  | 0.03  | 0.20  | -0.09 |   |   |   |
| RPneg_471.34769_11.272 | RP    | neg        | 11.272          | 471.3477   |            |      | 4        |         | 0.16210                    | 0.50653                                 | 0.20  | 0.32                  | 0.28  | 0.20  | 0.55   | 0.47    | 0.24457 | 0.76082 | 0.30                       | 1.02                     | 0.26  | 0.14     | 0.48  | 0.19  | 0.09    | 0.24457 | 0.76082 | 0.30                  | 1.02  | 0.26  | 0.14   | 0.48  | 0.19  | 0.09  |   |   |   |
| HILICpos_471.38_0.41   | HILIC | pos        | 0.41            | 471.3800   |            |      | 4        |         | 0.33142                    | 0.65557                                 | -0.28 | -0.25                 | -0.15 | 0.03  | -0.21  | -0.38   | 0.49011 | 0.89836 | 0.26                       | 1.33                     | -0.10 | 0.50     | -0.01 | 0.19  | 0.50    | 0.49011 | 0.89836 | 0.26                  | 1.33  | -0.10 | 0.50   | -0.01 | 0.19  | 0.50  |   |   |   |
| HILICneg_471.7271_1.32 | HILIC | neg        | 1.32            | 471.7271   |            |      | 4        |         | 0.26379                    | 0.60089                                 | 0.26  | 0.49                  | 0.30  | 0.42  | 0.41   | -0.15   | 0.53434 | 0.91325 | -0.01                      | -0.08                    | -0.09 | 0.19     | 0.01  | -0.01 | -0.06   | 0.53434 | 0.91325 | -0.01                 | -0.08 | -0.09 | 0.19   | 0.01  | -0.01 | -0.06 |   |   |   |
| RPpos_471.738_5.07     | RP    | pos        | 5.07            | 471.7380   |            |      | 4        |         | 0.00781                    | 0.17365                                 | -0.15 | 0.21                  | 0.01  | 0.22  | -0.38  | -0.13   | 0.79506 | 0.96812 | 0.04                       | 0.14                     | 0.12  | 0.08     | -0.18 | 0.30  | 0.06    | 0.79506 | 0.96812 | 0.04                  | 0.14  | 0.12  | 0.08   | -0.18 | 0.30  | 0.06  |   |   |   |
| RPpos_471.7381_4.93    | RP    | pos        | 4.93            | 471.7381   |            |      | 4        |         | 0.03374                    | 0.30413                                 | -0.13 | 0.26                  | -0.01 | 0.34  | -0.39  | 0.03    | 0.43036 | 0.87379 | -0.05                      | 0.06                     | 0.01  | -0.07    | -0.17 | -0.04 | -0.03   | 0.43036 | 0.87379 | -0.05                 | 0.06  | 0.01  | -0.07  | -0.17 | -0.04 | -0.03 |   |   |   |
| RPneg_472.15482_10.85  | RP    | neg        | 10.85           | 472.1548   |            |      | 4        |         | 0.06565                    | 0.37692                                 | 0.38  | -0.06                 | 0.12  | 0.00  | 1.38   | -0.12   | 0.56677 | 0.92089 | 0.16                       | -0.02                    | 0.46  | 0.05     | 0.18  | 0.55  | -0.12   | 0.56677 | 0.92089 | 0.16                  | -0.02 | 0.46  | 0.05   | 0.18  | 0.55  | -0.12 |   |   |   |
| RPneg_472.177_11.199   | RP    | neg        | 11.199          | 472.1770   |            |      | 4        |         | 0.00224                    | 0.21031                                 | 1.05  | 0.05                  | 0.32  | 0.88  | 2.27   | -0.22   | 0.51733 | 0.98820 | 0.00                       | -0.08                    | 0.19  | -0.13    | 0.14  | -0.15 | 0.03    | 0.51733 | 0.98820 | 0.00                  | -0.08 | 0.19  | -0.13  | 0.14  | -0.15 | 0.03  |   |   |   |
| RPpos_472.2889_6.39    | RP    | pos        | 6.39            | 472.2889   |            |      | 4        |         | 0.45434                    | 0.74686                                 | -0.31 | -0.02                 | 0.44  | -0.25 | -0.09  | 0.09    | 0.39734 | 0.79957 | 0.46                       | 0.37                     | 0.20  | 0.65     | 0.40  | 0.47  | 0.15    | 0.39734 | 0.79957 | 0.46                  | 0.37  | 0.20  | 0.65   | 0.40  | 0.47  | 0.15  |   |   |   |
| RPneg_472.2894_7.63    | RP    | neg        | 7.63            | 472.2894   |            |      | 4        |         | 0.58555                    | 0.82159                                 | -0.18 | -0.25                 | 0.17  | -0.18 | -0.09  | 0.36    | 0.84600 | 0.97713 | 0.00                       | 0.49                     | 0.38  | 0.10     | -0.10 | -0.62 | -0.18   | 0.84600 | 0.97713 | 0.00                  | 0.49  | 0.38  | 0.10   | -0.10 | -0.62 | -0.18 |   |   |   |
| RPneg_                 |       |            |                 |            |            |      |          |         |                            |                                         |       |                       |       |       |        |         |         |         |                            |                          |       |          |       |       |         |         |         |                       |       |       |        |       |       |       |   |   |   |



|                        |       |            |                 |            |            |                    |          |         |          |         |       | IV-Alcohol self-administration (IV-ASA) |       |       |       |          |         |         |       |       | IV-Alcohol clamp (IV-AC) |       |       |       |                            |       |   |   |          |   |   |         |   |   |   |       |   |   |   |         |   |   |        |   |  |
|------------------------|-------|------------|-----------------|------------|------------|--------------------|----------|---------|----------|---------|-------|-----------------------------------------|-------|-------|-------|----------|---------|---------|-------|-------|--------------------------|-------|-------|-------|----------------------------|-------|---|---|----------|---|---|---------|---|---|---|-------|---|---|---|---------|---|---|--------|---|--|
|                        |       |            |                 |            |            |                    |          |         |          |         |       | IV-Ghrelin or Placebo                   |       |       |       |          |         |         |       |       | IV-Ghrelin or Placebo    |       |       |       |                            |       |   |   |          |   |   |         |   |   |   |       |   |   |   |         |   |   |        |   |  |
|                        |       |            |                 |            |            |                    |          |         |          |         |       | Area Under the Curve (AUC)              |       |       |       | Baseline |         |         |       |       | BrAC=0                   |       |       |       | Area Under the Curve (AUC) |       |   |   | Baseline |   |   | Post-LD |   |   |   | IV-AC |   |   |   | Post-AC |   |   | BrAC=0 |   |  |
| Feature_ID             | Mode  | Ionization | Average_Rt.min. | Average_Mz | Metabolite | MSMS               | ID_Level | HMDB_ID | p        |         |       | q                                       |       |       | d     |          |         | d       |       |       | d                        |       |       | d     |                            |       | d |   |          | d |   |         | d |   |   | d     |   |   | d |         |   |   |        |   |  |
|                        |       |            |                 |            |            |                    |          |         | p        | q       | d     | p                                       | q     | d     | p     | q        | d       | p       | q     | d     | p                        | q     | d     | p     | q                          | d     | p | q | d        | p | q | d       | p | q | d | p     | q | d | p | q       | d | p | q      | d |  |
| RPneg_475.16348_10.85  | RP    | neg        | 10.85           |            | 475.1635   |                    | 4        |         | 0.08802  | 0.41499 | 0.39  | -0.07                                   | 0.12  | 0.06  | 1.38  | 0.00     | 0.67714 | 0.94718 | 0.11  | 0.00  | 0.34                     | 0.08  | 0.21  | 0.08  | 0.08                       | -0.10 |   |   |          |   |   |         |   |   |   |       |   |   |   |         |   |   |        |   |  |
| RPpos_475.1835_10.16   | RP    | pos        | 10.16           |            | 475.1835   |                    | 4        |         | 0.54753  | 0.80252 | 0.21  | 0.49                                    | 0.95  | -0.12 | 0.28  | -0.01    | 0.37943 | 0.84640 | -0.55 | -0.30 | 0.22                     | -0.49 | -0.03 | -1.06 | 0.18                       |       |   |   |          |   |   |         |   |   |   |       |   |   |   |         |   |   |        |   |  |
| HILICpos_475.1951_5.8  | HILIC | pos        | 5.8             |            | 475.1951   |                    | 4        |         | 0.62055  | 0.83891 | 0.18  | 0.59                                    | 0.79  | 0.37  | 0.13  | -0.48    | 0.02787 | 0.34917 | 1.11  | 1.35  | 1.05                     | 1.31  | 0.80  | 0.68  | 0.34                       |       |   |   |          |   |   |         |   |   |   |       |   |   |   |         |   |   |        |   |  |
| RPneg_475.19534_6.903  | RP    | neg        | 6.903           |            | 475.1953   | adduct of cortisol | 4        |         | 6.02E-07 | 0.00077 | 2.83  | 0.13                                    | 3.47  | 2.46  | 4.90  | -0.48    | 0.00000 | 0.00000 | 2.71  | -0.16 | 2.38                     | 3.56  | 3.06  | 2.95  | -0.30                      |       |   |   |          |   |   |         |   |   |   |       |   |   |   |         |   |   |        |   |  |
| RPneg_475.19586_6.772  | RP    | neg        | 6.772           |            | 475.19586  |                    | 4        |         | 0.07314  | 0.39166 | -0.35 | -0.40                                   | 0.26  | -0.05 | 0.63  | -0.15    | 0.30536 | 0.80519 | -0.54 | -0.25 | -0.49                    | -0.88 | 0.11  | -0.05 | -0.25                      |       |   |   |          |   |   |         |   |   |   |       |   |   |   |         |   |   |        |   |  |
| HILICneg_475.2466_4.94 | HILIC | neg        | 4.94            |            | 475.2466   |                    | 4        |         | 0.80429  | 0.92469 | 0.01  | -0.02                                   | 0.03  | 0.25  | 0.75  | 0.00     | 0.03521 | 0.09971 | 0.05  | -0.21 | 0.06                     | 0.04  | 0.04  | 0.16  | -0.35                      |       |   |   |          |   |   |         |   |   |   |       |   |   |   |         |   |   |        |   |  |
| RPneg_475.26767_9.227  | RP    | neg        | 9.227           |            | 475.2677   |                    | 4        |         | 0.09159  | 0.42023 | -0.38 | -0.20                                   | -0.31 | -0.37 | -0.30 | -0.59    | 0.01708 | 0.27919 | 0.52  | -0.01 | 0.30                     | 0.71  | 0.68  | 0.72  | 0.59                       |       |   |   |          |   |   |         |   |   |   |       |   |   |   |         |   |   |        |   |  |
| RPpos_475.2968_11.8    | RP    | pos        | 11.8            |            | 475.2968   |                    | 4        |         | 0.84955  | 0.94362 | 0.08  | -0.04                                   | -0.32 | 0.76  | 0.34  | -0.20    | 0.76928 | 0.96454 | 0.00  | 0.32  | -0.14                    | 0.91  | -0.63 | 0.02  | -0.49                      |       |   |   |          |   |   |         |   |   |   |       |   |   |   |         |   |   |        |   |  |
| RPneg_475.30612_9.835  | RP    | neg        | 9.835           |            | 475.3061   |                    | 4        |         | 0.86693  | 0.95015 | 0.07  | -0.30                                   | 2.14  | -0.13 | -0.24 | -0.14    | 0.00500 | 0.14866 | -0.37 | -0.37 | 0.08                     | -0.61 | -0.28 | -0.41 | -0.86                      |       |   |   |          |   |   |         |   |   |   |       |   |   |   |         |   |   |        |   |  |
| RPneg_475.32645_9.576  | RP    | neg        | 9.576           |            | 475.3265   |                    | 4        |         | 0.43019  | 0.73046 | 0.27  | 0.56                                    | 0.50  | 0.27  | 0.44  | -0.44    | 0.01932 | 0.29372 | 0.68  | 0.80  | 0.71                     | 0.61  | 0.68  | 0.63  | 0.76                       |       |   |   |          |   |   |         |   |   |   |       |   |   |   |         |   |   |        |   |  |
| HILICneg_475.327_1.32  | HILIC | neg        | 1.32            |            | 475.3270   |                    | 4        |         | 0.38014  | 0.69437 | 0.32  | 0.57                                    | 0.52  | 0.41  | 0.46  | -0.36    | 0.00172 | 0.07875 | 0.85  | 0.72  | 0.79                     | 0.87  | 0.88  | 0.86  | 0.60                       |       |   |   |          |   |   |         |   |   |   |       |   |   |   |         |   |   |        |   |  |
| RPneg_475.3429_10.19   | RP    | neg        | 10.19           |            | 475.3429   |                    | 4        |         | 0.12824  | 0.46431 | 0.51  | 0.39                                    | 0.63  | 0.63  | 0.81  | -0.17    | 0.98170 | 0.99752 | -0.01 | -0.17 | -0.13                    | 0.01  | 0.14  | 0.13  | -0.05                      |       |   |   |          |   |   |         |   |   |   |       |   |   |   |         |   |   |        |   |  |
| RPneg_475.3797_11.507  | RP    | neg        | 11.507          |            | 475.3797   |                    | 4        |         | 0.35965  | 0.67828 | 0.08  | -0.21                                   | -0.28 | 0.14  | 0.82  | 0.28     | 0.04266 | 0.41676 | -0.17 | -0.25 | -0.21                    | -0.10 | -0.06 | -0.11 | -0.33                      |       |   |   |          |   |   |         |   |   |   |       |   |   |   |         |   |   |        |   |  |
| RPpos_475.4385_12.61   | RP    | pos        | 12.61           |            | 475.4385   |                    | 4        |         | 0.94933  | 0.98123 | -0.01 | 0.26                                    | 0.12  | 0.12  | 0.30  | 0.07     | 0.07064 | 0.50856 | 0.32  | 0.36  | 0.29                     | 0.18  | 0.06  | 0.51  | 0.13                       |       |   |   |          |   |   |         |   |   |   |       |   |   |   |         |   |   |        |   |  |
| HILICpos_475.4473_3.6  | HILIC | pos        | 3.6             |            | 475.4473   |                    | 4        |         | 0.61110  | 0.83386 | -0.15 | 0.07                                    | 0.17  | 0.19  | -0.04 | -0.62    | 0.00002 | 0.00433 | 0.45  | 0.54  | 0.34                     | 0.35  | 0.37  | 0.46  | 0.36                       |       |   |   |          |   |   |         |   |   |   |       |   |   |   |         |   |   |        |   |  |
| RPpos_476.1117_7.07    | RP    | pos        | 7.07            |            | 476.1117   |                    | 4        |         | 0.14865  | 0.49096 | -0.25 | -0.30                                   | 0.82  | -0.17 | -0.51 | 0.40     | 0.67559 | 0.94697 | -0.23 | -0.31 | -0.04                    | -0.43 | 0.17  | -0.15 | -0.10                      |       |   |   |          |   |   |         |   |   |   |       |   |   |   |         |   |   |        |   |  |
| RPneg_476.15564_7.169  | RP    | neg        | 7.169           |            | 476.1556   |                    | 4        |         | 0.42281  | 0.72489 | -0.25 | -0.16                                   | -0.07 | -0.02 | -0.23 | -0.89    | 0.04326 | 0.41903 | 3.53  | 2.88  | 4.42                     | 2.93  | 2.81  | 2.92  | 2.77                       |       |   |   |          |   |   |         |   |   |   |       |   |   |   |         |   |   |        |   |  |
| RPpos_476.1918_6.93    | RP    | pos        | 6.93            |            | 476.1918   |                    | 4        |         | 0.45101  | 0.74461 | 0.07  | -0.06                                   | 0.18  | 0.38  | 0.02  | 0.05     | 0.06935 | 0.50470 | 0.31  | 0.35  | 0.08                     | 0.55  | 0.34  | 0.66  | 0.18                       |       |   |   |          |   |   |         |   |   |   |       |   |   |   |         |   |   |        |   |  |
| RPpos_476.192_7.45     | RP    | pos        | 7.45            |            | 476.1920   |                    | 4        |         | 0.37220  | 0.68821 | 0.15  | -0.02                                   | 0.30  | 0.36  | 0.19  | 0.01     | 0.14038 | 0.64251 | 0.34  | 0.11  | 0.11                     | 0.04  | 0.07  | 0.57  | 0.51                       |       |   |   |          |   |   |         |   |   |   |       |   |   |   |         |   |   |        |   |  |
| RPneg_476.1920_7.064   | RP    | neg        | 7.064           |            | 476.1920   |                    | 4        |         | 0.24758  | 0.58752 | 0.41  | 0.44                                    | 0.67  | 0.47  | 0.52  | -0.13    | 0.00029 | 0.02558 | 1.32  | 1.33  | -1.19                    | 1.32  | 1.34  | 1.47  | 1.31                       |       |   |   |          |   |   |         |   |   |   |       |   |   |   |         |   |   |        |   |  |
| HILICpos_476.2261_0.94 | HILIC | pos        | 0.94            |            | 476.2261   |                    | 4        |         | 0.71775  | 0.88483 | 0.04  | 0.20                                    | 0.20  | 0.19  | 0.31  | -0.47    | 0.05855 | 0.47550 | -0.32 | -0.37 | -0.13                    | -0.15 | -0.31 | -0.64 | -0.17                      |       |   |   |          |   |   |         |   |   |   |       |   |   |   |         |   |   |        |   |  |
| RPneg_476.24649_9.234  | RP    | neg        | 9.234           |            | 476.2465   |                    | 4        |         | 0.62353  | 0.84026 | 0.14  | 0.01                                    | 0.40  | 0.12  | 0.18  | 0.31     | 0.99667 | 0.99953 | 0.00  | -0.38 | 0.26                     | 0.12  | 0.15  | -0.14 | -0.21                      |       |   |   |          |   |   |         |   |   |   |       |   |   |   |         |   |   |        |   |  |
| RPpos_476.2771_9.83    | RP    | pos        | 9.83            |            | 476.2771   |                    | 4        |         | 0.73371  | 0.89218 | -0.04 | -0.14                                   | 0.43  | 0.04  | 0.01  | 0.41     | 0.42849 | 0.87288 | 0.30  | 0.29  | 0.24                     | 0.73  | 0.35  | 0.12  | 0.15                       |       |   |   |          |   |   |         |   |   |   |       |   |   |   |         |   |   |        |   |  |
| HILICneg_476.2777_1.79 | HILIC | neg        | 1.79            |            | 476.2777   |                    | 4        |         | 0.44854  | 0.74295 | -0.18 | -0.23                                   | 0.41  | 0.21  | -0.11 | -0.21    | 0.93232 | 0.98984 | 0.00  | -0.16 | 0.03                     | 0.09  | 0.22  | 0.03  | -0.30                      |       |   |   |          |   |   |         |   |   |   |       |   |   |   |         |   |   |        |   |  |
| HILICneg_476.2777_2.05 | HILIC | neg        | 2.05            |            | 476.2777   |                    | 4        |         | 0.60900  | 0.83311 | -0.14 | -0.12                                   | 0.32  | 0.26  | -0.06 | -0.11    | 0.89648 | 0.98504 | -0.07 | -0.12 | -0.04                    | -0.03 | 0.14  | -0.02 | -0.33                      |       |   |   |          |   |   |         |   |   |   |       |   |   |   |         |   |   |        |   |  |
| RPneg_476.27823_10.265 | RP    | neg        | 10.265          |            | 476.2782   |                    | 4        |         | 0.56425  | 0.81126 | -0.15 | -0.07                                   | 0.48  | 0.22  | -0.04 | -0.11    | 0.92128 | 0.98863 | -0.06 | -0.15 | -0.09                    | -0.09 | 0.23  | 0.05  | -0.43                      |       |   |   |          |   |   |         |   |   |   |       |   |   |   |         |   |   |        |   |  |
| RPneg_476.30222_9.002  | RP    | neg        | 9.002           |            | 476.3022   |                    | 4        |         | 0.13939  | 0.47911 | 0.09  | 0.02                                    | 0.17  | -0.06 | 0.33  | 0.51     | 0.48145 | 0.89516 | -0.14 | -0.17 | -0.04                    | -0.10 | -0.16 | -0.19 | -0.17                      |       |   |   |          |   |   |         |   |   |   |       |   |   |   |         |   |   |        |   |  |
| HILICpos_476.3051_0.62 | HILIC | pos        | 0.62            |            | 476.3051   |                    | 4        |         | 0.13862  | 0.47807 | -0.38 | -0.27                                   | 0.34  | 0.06  | -0.45 | 0.12     | 0.01180 | 0.23150 | -0.59 | -0.37 | -0.47                    | -0.52 | -0.24 | -0.15 | -0.30                      |       |   |   |          |   |   |         |   |   |   |       |   |   |   |         |   |   |        |   |  |
| RPpos_476.306_4.66     | RP    | pos        | 4.66            |            | 476.3060   |                    | 4        |         | 0.29098  | 0.62396 | -0.34 | -0.15                                   | 0.71  | 0.08  | -0.49 | 0.67     | 0.01873 | 0.29089 | -0.50 | -0.27 | -0.23                    | -0.43 | -0.23 | -0.46 | -0.65                      |       |   |   |          |   |   |         |   |   |   |       |   |   |   |         |   |   |        |   |  |
| RPpos_476.3064_4.79    | RP    | pos        | 4.79            |            | 476.3064   |                    | 4        |         | 0.24705  | 0.58731 | -0.34 | -0.08                                   | 0.48  | 0.31  | -0.40 | 0.26     | 0.04188 | 0.41486 | -0.43 | -0.32 | -0.07                    | -0.41 | 0.03  | -0.26 | -0.48                      |       |   |   |          |   |   |         |   |   |   |       |   |   |   |         |   |   |        |   |  |
| RPpos_476.3745_9.5     | RP    | pos        | 9.5             |            | 476.3745   |                    | 4        |         | 0.73145  | 0.89908 | -0.03 | 0.25                                    | 0.41  | -0.19 | 0.13  | -0.14    | 0.85209 | 0.97768 | 0.12  | -0.21 | 0.39                     | 0.43  | 0.08  | 0.11  | -0.20                      |       |   |   |          |   |   |         |   |   |   |       |   |   |   |         |   |   |        |   |  |
| RPpos_476.394_8.13     | RP    | pos        | 8.13            |            | 476.394    |                    | 4        |         | 0.45101  | 0.80008 | -0.40 | 0.19                                    | -0.10 | -0.26 | -0.24 | 0.69     | 0.79642 | 0.96832 | 0.10  | 0.14  | -0.19                    | 0.19  | -0.16 | 0.25  | 0.41                       |       |   |   |          |   |   |         |   |   |   |       |   |   |   |         |   |   |        |   |  |
| RPneg_477.08554_7.957  | RP    | neg        | 7.957           |            | 477.0855   |                    | 4        |         | 0.33677  | 0.47653 | -0.52 | 0.08                                    | -0.02 | 0.05  | -0.19 | 0.12     | 0.05455 | 0.46327 | -0.23 | 0.08  | 0.04                     | 0.07  | -0.46 | -0.89 | -0.06                      |       |   |   |          |   |   |         |   |   |   |       |   |   |   |         |   |   |        |   |  |
| RPneg_477.08582_7.955  | RP    | neg        | 7.955           |            | 477.0858   |                    | 4        |         | 0.19381  | 0.53927 | -0.43 | 0.13                                    | -0.01 | -0.09 | 0.41  | -0.41    | 0.65493 | 0.94016 | -0.09 | 0.08  | -0.06                    | 0.03  | 0.25  | -0.19 | -0.03                      |       |   |   |          |   |   |         |   |   |   |       |   |   |   |         |   |   |        |   |  |
| HILICneg_477.0992_0.5  | HILIC | neg        | 0.5             |            | 477.0992   |                    | 4        |         | 0.46038  | 0.75115 | 0.21  | 0.22                                    | 0.34  | 0.42  | 0.13  | 0.77     | 0.16579 | 0.67711 | -0.45 | -0.48 | -0.41                    | -0.31 | -0.61 | -0.41 | -0.63                      |       |   |   |          |   |   |         |   |   |   |       |   |   |   |         |   |   |        |   |  |
| RPneg_477.10263_5.787  | RP    | neg        | 5.787           |            | 477.1026   |                    | 4        |         | 0.01465  | 0.22805 | 0.36  | 0.09                                    | 0.30  | 0.53  | 0.64  | -0.43    | 0.79842 | 0.96921 | -0.09 | -0.19 | -0.18                    | -0.11 | 0.01  | 0.08  | -0.02                      |       |   |   |          |   |   |         |   |   |   |       |   |   |   |         |   |   |        |   |  |
| HILICneg_477.1035_3.4  | HILIC | neg        | 3.4             |            | 477.1035   |                    | 4        |         | 0.03793  | 0.31485 | 0.26  | -0.09                                   | 0.21  | 0.47  | 0.48  | -0.47    | 0.79047 | 0.96713 | -0.09 | -0.21 | -0.19                    | -0.11 | 0.01  | 0.11  | 0.01                       |       |   |   |          |   |   |         |   |   |   |       |   |   |   |         |   |   |        |   |  |
| RPneg_477.10498_5.492  | RP    | neg        | 5.492           |            | 477.1050   |                    | 4        |         | 0.05516  | 0.35667 | 0.53  | -0.06                                   | 0.29  | 0.77  | 1.35  | -0.47    | 0.67784 | 0.94718 | 0.16  | -0.08 | -0.05                    | 0.16  | 0.47  | 0.58  | -0.04                      |       |   |   |          |   |   |         |   |   |   |       |   |   |   |         |   |   |        |   |  |
| RPpos_477.1195_7.07    | RP    | pos        | 7.07            |            | 477.1195   |                    | 4        |         | 0.09768  | 0.42769 | -0.32 | -0.24                                   | 0.49  | -0.11 | -0.52 | 0.09     | 0.88187 | 0.98281 | -0.10 | -0.16 | 0.05                     | -0.59 | 0.29  | -0.05 | 0.15                       |       |   |   |          |   |   |         |   |   |   |       |   |   |   |         |   |   |        |   |  |
| RPpos_477.1426_7.41    | RP    | pos        | 7.41            |            | 477.1426   |                    | 4        |         | 0.57171  | 0.81503 | 0.04  | -0.05                                   | 0.18  | 0.15  | 0.11  | 0.48     | 0.01480 | 0.25933 | 0.10  | 0.03  | -0.09                    | 0.02  | 0.22  | 0.18  | 0.15                       |       |   |   |          |   |   |         |   |   |   |       |   |   |   |         |   |   |        |   |  |
| RPneg_477.17712_10.923 | RP    | neg        | 10.923          |            | 477.1771   |                    | 4        |         | 0.01076  | 0.20147 | 0.78  | 0.22                                    | 0.59  | 0.66  | 1.66  | 0.02     | 0.76422 | 0.96330 | 0.03  | -0.32 | 0.64                     | -0.33 | -0.06 | 0.13  | -0.06                      |       |   |   |          |   |   |         |   |   |   |       |   |   |   |         |   |   |        |   |  |
| RPneg_477.17905_11     | RP    | neg        | 11              |            | 477.1791   |                    | 4        |         | 0.00216  | 0.09450 | 1.22  | 0.18                                    | 0.76  | 0.70  | 2.34  | -0.04    | 0.74038 | 0.95980 | 0.12  | -0.05 | 0.49                     | -0.01 | 0.16  | 0.06  | -0.08                      |       |   |   |          |   |   |         |   |   |   |       |   |   |   |         |   |   |        |   |  |
| HILICpos_477.2104_5.8  | HILIC | pos        | 5.8             |            | 477.2104   |                    | 4        |         | 0.63269  | 0.84427 | 0.17  | 0.59                                    | 0.73  | 0.30  | 0.22  | -0.89    | 0.09521 | 0.56376 | 0.84  | 0.38  | 0.90                     | 0.92  | 0.52  | 0.67  | 0.14                       |       |   |   |          |   |   |         |   |   |   |       |   |   |   |         |   |   |        |   |  |
| RPneg_477.21304_8.13   | RP    | neg        | 8.13            |            | 477.2130   |                    | 4        |         | 0.39094  | 0.70197 | -0.27 | 0.02                                    | 0.57  | -0.51 | -0.49 | -0.08    | 0.75537 | 0.96233 | 0.12  | -0.10 | 0.57                     | -0.46 | 0.60  | -0.27 | 0.02                       |       |   |   |          |   |   |         |   |   |   |       |   |   |   |         |   |   |        |   |  |
| RPneg_477.23401_6.751  | RP    | neg        | 6.751           |            | 477.2340   |                    | 4        |         | 0.48829  | 0.77009 | 0.19  | 0.29                                    | 0.49  | 0.16  | 0.24  | 0.27     | 0.93659 | 0.83402 | -0.20 | -0.34 | -0.27                    | -0.11 | -0.52 | 0.10  | -0.17                      |       |   |   |          |   |   |         |   |   |   |       |   |   |   |         |   |   |        |   |  |
| RPneg_477.2597_6.772   | RP    | neg        | 6.772           |            | 477.2597   |                    | 4        |         | 0.19598  | 0.54092 | 0.31  | 0.24                                    | 0.29  | 0.43  | 0.54  | 0.81     | 0.18003 | 0.69487 | -0.38 | -0.42 | -0.40                    | -0.40 | -0.30 | -0.35 | -0.36                      |       |   |   |          |   |   |         |   |   |   |       |   |   |   |         |   |   |        |   |  |
| RPpos_477.2673_6.6     | RP    | pos        | 6.6             |            | 477.2673   |                    | 4        |         | 0.64143  | 0.84812 | -0.12 | -0.34                                   | 0.33  | 0.08  | -0.12 | 0.29     | 0.99046 | 0.99856 | -0.03 | 0.02  | 0.03                     | 0.15  | 0.06  | -0.85 | -0.05                      |       |   |   |          |   |   |         |   |   |   |       |   |   |   |         |   |   |        |   |  |

| Feature_ID             | Mode | Ionization | Average Rt.min. | Average.Mz | Metabolite         | MSMS                                                                    | ID_level | HMDB_ID | IV-Alcohol self-administration (IV-ASA) |         |       |                       |       |       |       |       |        |   |         | IV-Alcohol clamp (IV-AC)   |       |       |        |       |       |         |       |                       |   |   |         |   |        |   |
|------------------------|------|------------|-----------------|------------|--------------------|-------------------------------------------------------------------------|----------|---------|-----------------------------------------|---------|-------|-----------------------|-------|-------|-------|-------|--------|---|---------|----------------------------|-------|-------|--------|-------|-------|---------|-------|-----------------------|---|---|---------|---|--------|---|
|                        |      |            |                 |            |                    |                                                                         |          |         | Area Under the Curve (AUC)              |         |       | IV-Ghrelin or Placebo |       |       |       |       | BrAC=0 |   |         | Area Under the Curve (AUC) |       |       | BrAC=0 |       |       | Post-LD |       | IV-Ghrelin or Placebo |   |   | Post-AC |   | BrAC=0 |   |
|                        |      |            |                 |            |                    |                                                                         |          |         | p                                       | q       | d     | d                     | d     | d     | d     | d     | d      | d | d       | p                          | q     | d     | d      | d     | d     | d       | d     | d                     | d | d | d       | d | d      | d |
| RPneg_479.12039_6.072  | RP   | neg        | 6.072           | 479.1204   |                    |                                                                         | 4        |         | 0.17751                                 | 0.52334 | 0.32  | -0.09                 | 0.55  | 0.45  | 0.36  | -0.27 |        |   | 0.48418 | 0.89681                    | 0.38  | -0.17 | 0.04   | 0.22  | 0.94  | 1.78    | -0.18 |                       |   |   |         |   |        |   |
| RPneg_479.13794_6.904  | RP   | neg        | 6.904           | 479.1379   | adduct of cortisol |                                                                         | 4        |         | 8.72E-08                                | 0.00030 | 2.42  | 0.26                  | 3.05  | 2.10  | 3.58  | -0.57 |        |   | 0.00000 | 0.00000                    | 2.65  | -0.14 | 2.20   | 3.87  | 2.45  | 2.72    | -0.42 |                       |   |   |         |   |        |   |
| RPneg_479.19324_11.194 | RP   | neg        | 11.194          | 479.1932   |                    |                                                                         | 4        |         | 0.01594                                 | 0.23882 | 0.96  | -0.01                 | 0.44  | 1.07  | 2.57  | -0.34 |        |   | 0.93133 | 0.98984                    | -0.05 | -0.25 | 0.19   | 2.47  | 0.05  | 0.03    | 0.02  |                       |   |   |         |   |        |   |
| RPneg_479.22763_7.131  | RP   | neg        | 7.131           | 479.2276   |                    |                                                                         | 4        |         | 0.00116                                 | 0.06905 | 0.84  | 0.82                  | 0.95  | 1.18  | 0.74  | 0.68  |        |   | 0.58626 | 0.92534                    | 0.27  | -0.04 | 0.11   | 0.27  | 0.67  | 0.66    | -0.13 |                       |   |   |         |   |        |   |
| RPneg_479.22775_7.741  | RP   | neg        | 7.741           | 479.2278   |                    |                                                                         | 4        |         | 0.01556                                 | 0.20706 | -0.10 | -0.23                 | -0.20 | -0.18 | -0.64 | 0.08  |        |   | 0.25710 | 0.77250                    | -0.62 | -0.41 | -0.36  | -0.53 | -0.67 | -0.10   | -0.36 |                       |   |   |         |   |        |   |
| RPneg_479.22921_7.513  | RP   | neg        | 7.513           | 479.2291   |                    |                                                                         | 4        |         | 0.17341                                 | 0.51891 | 0.15  | 0.02                  | 0.19  | 0.32  | 0.41  | 0.08  |        |   | 0.62886 | 0.75442                    | 0.39  | 0.04  | 0.28   | 0.19  | 0.52  | 0.40    | -0.02 |                       |   |   |         |   |        |   |
| RPneg_479.22943_7.037  | RP   | neg        | 7.037           | 479.2294   |                    |                                                                         | 4        |         | 0.00167                                 | 0.08275 | 0.66  | 0.07                  | 0.73  | 1.02  | 1.46  | -0.32 |        |   | 0.27401 | 0.78435                    | 0.32  | -0.02 | -0.01  | 0.38  | 0.82  | 0.64    | -0.33 |                       |   |   |         |   |        |   |
| RPneg_479.26453_8.748  | RP   | neg        | 8.748           | 479.2645   |                    |                                                                         | 4        |         | 0.35049                                 | 0.67073 | -0.02 | 0.03                  | 0.01  | -0.06 | 0.10  | 0.28  |        |   | 0.63185 | 0.93546                    | -0.09 | -0.10 | -0.07  | -0.11 | 0.04  | -0.05   | -0.11 |                       |   |   |         |   |        |   |
| RPneg_479.26532_6.573  | RP   | neg        | 6.573           | 479.2653   |                    |                                                                         | 4        |         | 0.32514                                 | 0.65082 | -0.30 | -0.13                 | -0.20 | -0.27 | -0.04 | -0.71 |        |   | 0.65458 | 0.94016                    | 1.46  | 1.13  | 1.83   | 1.48  | 1.11  | 1.34    | 1.65  |                       |   |   |         |   |        |   |
| HLICneg_479.2834_0.46  | HLIC | neg        | 0.46            | 479.2834   |                    |                                                                         | 4        |         | 0.15352                                 | 0.49650 | -0.23 | 0.27                  | -0.10 | -0.40 | 0.27  | -0.59 |        |   | 0.90348 | 0.98602                    | 0.13  | 0.20  | 0.35   | 0.15  | 0.31  | -0.04   | -0.26 |                       |   |   |         |   |        |   |
| RPneg_479.30182_9.311  | RP   | neg        | 9.311           | 479.3018   |                    |                                                                         | 4        |         | 0.69438                                 | 0.87465 | -0.14 | -0.14                 | -0.12 | -0.06 | -0.12 | -0.14 |        |   | 0.81809 | 0.97238                    | 0.04  | 0.07  | 0.02   | 0.05  | 0.02  | 0.09    | 0.09  |                       |   |   |         |   |        |   |
| RPneg_480.16684_8.443  | RP   | neg        | 8.443           | 480.1668   |                    |                                                                         | 4        |         | 0.00025                                 | 0.03035 | 0.68  | -0.03                 | 1.41  | 0.73  | 1.28  | 0.24  |        |   | 0.00005 | 0.00696                    | 0.64  | -0.10 | 0.55   | 0.78  | 1.33  | 1.15    | -0.26 |                       |   |   |         |   |        |   |
| RPneg_480.18164_10.877 | RP   | neg        | 10.877          | 480.1816   |                    |                                                                         | 4        |         | 0.48299                                 | 0.76624 | 0.26  | 0.03                  | -0.05 | -0.07 | 1.74  | 0.39  |        |   | 0.90058 | 0.98557                    | 0.01  | -0.54 | 0.52   | -0.30 | -0.14 | 0.54    | 0.01  |                       |   |   |         |   |        |   |
| HLICpos_480.2125_1.33  | HLIC | pos        | 1.33            | 480.2125   |                    |                                                                         | 4        |         | 0.14477                                 | 0.48549 | 0.68  | 0.71                  | 1.15  | 0.75  | 0.83  | -0.44 |        |   | 0.29999 | 0.80208                    | 0.42  | 0.65  | 0.62   | 0.51  | 0.32  | 0.27    | -0.08 |                       |   |   |         |   |        |   |
| RPpos_480.2444_6.75    | RP   | pos        | 6.75            | 480.2444   |                    |                                                                         | 4        |         | 0.74655                                 | 0.89905 | -0.13 | 0.24                  | 0.69  | -0.22 | 0.73  | -0.14 |        |   | 0.88090 | 0.98281                    | 0.04  | 0.91  | 0.44   | -0.41 | 0.14  | -0.10   | -0.54 |                       |   |   |         |   |        |   |
| RPneg_480.2778_9.061   | RP   | neg        | 9.061           | 480.2778   |                    |                                                                         | 4        |         | 0.12730                                 | 0.46385 | 0.26  | 0.16                  | 0.41  | 0.14  | 0.39  | 0.68  |        |   | 0.69340 | 0.95008                    | -0.14 | -0.25 | 0.09   | -0.06 | -0.15 | -0.21   | -0.30 |                       |   |   |         |   |        |   |
| HLICpos_480.3073_1.61  | HLIC | pos        | 1.61            | 480.3073   |                    |                                                                         | 4        |         | 0.46572                                 | 0.75454 | -0.23 | -0.22                 | -0.03 | 0.07  | 0.00  | -0.47 |        |   | 0.53956 | 0.91464                    | 0.19  | -0.22 | 0.21   | 0.29  | 0.63  | 0.11    | -0.12 |                       |   |   |         |   |        |   |
| RPneg_480.30795_10.445 | RP   | neg        | 10.445          | 480.3080   |                    |                                                                         | 4        |         | 0.00725                                 | 0.16778 | -0.59 | 0.11                  | -0.09 | -0.78 | -0.19 | -0.46 |        |   | 0.08405 | 0.53900                    | -0.16 | -0.18 | -0.20  | -0.18 | -0.08 | -0.13   | -0.38 |                       |   |   |         |   |        |   |
| RPpos_480.3083_10.44   | RP   | pos        | 10.44           | 480.3083   |                    |                                                                         | 4        |         | 0.71082                                 | 0.88198 | -0.19 | -0.19                 | 0.02  | -0.16 | -0.14 | -0.23 |        |   | 0.32394 | 0.81725                    | -0.28 | -0.03 | -0.17  | 0.33  | 0.64  | 0.33    | -0.05 |                       |   |   |         |   |        |   |
| RPpos_480.3085_9.9     | RP   | pos        | 9.9             | 480.3086   |                    |                                                                         | 4        |         | 0.03066                                 | 0.29518 | -0.60 | -0.28                 | -0.20 | -0.43 | -0.47 | -0.28 |        |   | 0.45084 | 0.88211                    | -0.17 | -0.11 | -0.20  | -0.18 | -0.34 | 0.06    | 0.04  |                       |   |   |         |   |        |   |
| RPneg_480.3089_10.875  | RP   | neg        | 10.875          | 480.3089   |                    |                                                                         | 4        |         | 0.05665                                 | 0.35927 | -0.40 | -0.02                 | -0.37 | -0.19 | -0.11 | -0.46 |        |   | 0.23989 | 0.75656                    | -0.09 | -0.14 | -0.06  | -0.06 | 0.22  | -0.05   | -0.53 |                       |   |   |         |   |        |   |
| RPneg_480.30905_10.314 | RP   | neg        | 10.314          | 480.3091   |                    |                                                                         | 4        |         | 0.01076                                 | 0.20147 | -0.46 | 0.08                  | 0.03  | -0.40 | -0.29 | -0.38 |        |   | 0.06465 | 0.49288                    | -0.19 | -0.09 | -0.22  | -0.31 | 0.03  | -0.08   | -0.41 |                       |   |   |         |   |        |   |
| HLICpos_480.3091_1.84  | HLIC | pos        | 1.84            | 480.3091   |                    |                                                                         | 4        |         | 0.43815                                 | 0.73563 | -0.24 | -0.14                 | 0.09  | 0.02  | -0.03 | -0.42 |        |   | 0.55507 | 0.91888                    | 0.17  | 0.01  | 0.13   | 0.22  | 0.52  | 0.17    | -0.12 |                       |   |   |         |   |        |   |
| RPneg_480.30917_10.768 | RP   | neg        | 10.768          | 480.3092   |                    |                                                                         | 4        |         | 0.01841                                 | 0.24749 | -0.44 | -0.03                 | -0.46 | -0.25 | -0.20 | -0.47 |        |   | 0.08030 | 0.53058                    | -0.13 | -0.26 | -0.15  | -0.07 | 0.12  | -0.06   | -0.52 |                       |   |   |         |   |        |   |
| HLICneg_480.3101_1.96  | HLIC | neg        | 1.96            | 480.3101   |                    |                                                                         | 4        |         | 0.05217                                 | 0.34975 | -0.37 | 0.00                  | -0.14 | -0.24 | -0.19 | -0.43 |        |   | 0.06066 | 0.48129                    | -0.10 | -0.12 | -0.11  | -0.07 | 0.13  | -0.08   | -0.44 |                       |   |   |         |   |        |   |
| HLICneg_480.3102_1.34  | HLIC | neg        | 1.34            | 480.3102   |                    |                                                                         | 4        |         | 0.01052                                 | 0.19941 | -0.44 | 0.06                  | -0.08 | -0.24 | -0.44 | -0.34 |        |   | 0.06297 | 0.48778                    | -0.16 | -0.23 | -0.08  | -0.17 | 0.03  | -0.18   | -0.26 |                       |   |   |         |   |        |   |
| HLICpos_480.3444_1.08  | HLIC | pos        | 1.08            | 480.3444   |                    |                                                                         | 4        |         | 0.00422                                 | 0.13243 | -0.51 | -0.03                 | 0.00  | -0.36 | -0.48 | -0.53 |        |   | 0.98885 | 0.99810                    | 0.27  | 0.23  | 0.54   | 0.21  | 0.50  | 0.03    | -0.22 |                       |   |   |         |   |        |   |
| RPpos_480.4249_11.37   | RP   | pos        | 11.37           | 480.4249   |                    |                                                                         | 4        |         | 0.28027                                 | 0.61455 | -0.39 | -0.13                 | 0.05  | 0.23  | 0.02  | 0.24  |        |   | 0.78565 | 0.96686                    | -0.09 | -0.18 | -0.59  | 0.29  | 0.27  | -0.20   | -0.21 |                       |   |   |         |   |        |   |
| RPpos_480.8021_6.39    | RP   | pos        | 6.39            | 480.8021   |                    |                                                                         | 4        |         | 0.38656                                 | 0.69906 | -0.34 | -0.02                 | 1.03  | -0.28 | -0.21 | -0.06 |        |   | 0.59869 | 0.92780                    | 0.27  | 0.30  | -0.07  | 0.78  | 0.17  | 0.25    | -0.66 |                       |   |   |         |   |        |   |
| RPneg_481.09689_11.192 | RP   | neg        | 11.192          | 481.0969   |                    |                                                                         | 4        |         | 0.00060                                 | 0.04712 | 1.61  | -0.04                 | 0.55  | 1.18  | 3.50  | -0.48 |        |   | 0.92388 | 0.98905                    | 0.03  | -0.23 | 0.46   | -0.22 | 0.10  | 0.02    | 0.04  |                       |   |   |         |   |        |   |
| RPneg_481.13681_7.428  | RP   | neg        | 7.428           | 481.1368   |                    |                                                                         | 4        |         | 0.30249                                 | 0.63173 | 0.09  | 0.03                  | 0.19  | 0.43  | 0.30  | -0.02 |        |   | 0.00092 | 0.05441                    | 0.12  | -0.11 | -0.07  | 0.27  | 0.32  | 0.11    | 0.04  |                       |   |   |         |   |        |   |
| HLICneg_481.1673_0.55  | HLIC | neg        | 0.55            | 481.1673   |                    |                                                                         | 4        |         | 0.14928                                 | 0.49185 | 0.21  | 0.01                  | 0.26  | 0.41  | 0.47  | 0.37  |        |   | 0.34485 | 0.82809                    | 0.08  | -0.30 | -0.07  | 0.33  | 0.16  | 0.26    | 0.14  |                       |   |   |         |   |        |   |
| HLICneg_481.1701_6.99  | HLIC | neg        | 6.99            | 481.1701   |                    |                                                                         | 4        |         | 0.07654                                 | 0.35242 | -0.09 | 0.03                  | 0.46  | 0.07  | -0.10 | -0.67 |        |   | 0.06039 | 0.44809                    | 0.26  | -0.04 | 0.61   | 0.63  | 0.10  | -0.35   | -0.04 |                       |   |   |         |   |        |   |
| RPneg_481.17148_6.764  | RP   | neg        | 6.764           | 481.1715   |                    |                                                                         | 4        |         | 0.27552                                 | 0.61073 | 0.53  | 0.09                  | 0.73  | 0.80  | 0.59  | -0.26 |        |   | 0.94564 | 0.99197                    | 0.01  | -0.07 | 0.01   | 0.12  | 0.09  | 0.21    | -0.01 |                       |   |   |         |   |        |   |
| RPpos_481.1854_1.6     | RP   | pos        | 1.6             | 481.1854   |                    |                                                                         | 4        |         | 0.57985                                 | 0.81821 | -0.06 | 0.05                  | 0.12  | 0.03  | -0.13 | -0.64 |        |   | 0.05256 | 0.45545                    | -0.34 | -0.49 | -0.13  | -0.38 | -0.31 | -0.29   | -0.64 |                       |   |   |         |   |        |   |
| RPneg_481.1864_7.503   | RP   | neg        | 7.503           | 481.1864   |                    |                                                                         | 4        |         | 0.01739                                 | 0.24235 | 0.46  | 0.04                  | 0.53  | 0.63  | 0.87  | 0.58  |        |   | 0.00126 | 0.06535                    | 0.39  | -0.09 | 0.06   | 0.39  | 0.65  | 0.70    | 0.10  |                       |   |   |         |   |        |   |
| HLICpos_481.1872_3.94  | HLIC | pos        | 3.94            | 481.1872   |                    |                                                                         | 4        |         | 0.30770                                 | 0.63634 | 0.27  | 0.12                  | 1.18  | 0.29  | 0.21  | -0.87 |        |   | 0.00174 | 0.07930                    | 1.31  | 0.40  | 2.20   | 1.76  | 1.36  | 0.36    | -0.17 |                       |   |   |         |   |        |   |
| HLICpos_481.205_0.55   | HLIC | pos        | 0.55            | 481.2050   |                    |                                                                         | 4        |         | 0.45444                                 | 0.74686 | -0.02 | 0.03                  | 0.43  | -0.06 | 0.14  | -0.08 |        |   | 0.00575 | 0.15994                    | 0.43  | 0.29  | 0.32   | 0.52  | 0.96  | 0.16    | -0.20 |                       |   |   |         |   |        |   |
| RPpos_481.2232_6.78    | RP   | pos        | 6.78            | 481.2232   |                    |                                                                         | 4        |         | 0.66788                                 | 0.86123 | -0.13 | 0.02                  | 0.87  | 1.10  | -0.30 | -0.12 |        |   | 0.75420 | 0.96233                    | -0.14 | -0.12 | -0.08  | -0.11 | -0.05 | 0.01    | -0.42 |                       |   |   |         |   |        |   |
| HLICneg_481.2433_3.22  | HLIC | neg        | 3.22            | 481.2433   |                    |                                                                         | 4        |         | 9.73E-08                                | 0.00030 | 1.00  | 0.27                  | 1.19  | 1.09  | 1.32  | -0.27 |        |   | 0.00000 | 0.00001                    | 1.35  | 0.60  | 0.52   | 1.39  | 2.18  | 1.75    | -0.18 |                       |   |   |         |   |        |   |
| RPneg_481.24408_7.265  | RP   | neg        | 7.265           | 481.2441   |                    |                                                                         | 4        |         | 0.12446                                 | 0.46006 | 1.14  | 0.97                  | 1.12  | 1.20  | 1.09  | 2.00  |        |   | 0.99432 | 0.99904                    | 0.00  | -0.29 | 0.02   | 0.06  | 0.06  | 0.24    | -0.44 |                       |   |   |         |   |        |   |
| RPneg_481.24414_7.013  | RP   | neg        | 7.013           | 481.2441   |                    | 481.2418 (100), 75.0087 (20), 85.0298 (15), 113.0248 (10), 391.4025 (5) | 4        |         | 0.00173                                 | 0.08397 | 0.66  | 0.58                  | 0.76  | 0.70  | 0.69  | 0.94  |        |   | 0.64625 | 0.93                       |       |       |        |       |       |         |       |                       |   |   |         |   |        |   |

| Feature_ID               | Mode  | Ionization | Average_Rt.min. | Average_Mz | Metabolite                                           | MS/MS       | ID_Level | HMDB_ID | IV-Alcohol self-administration (IV-ASA) |         |       |       |       |       |                       |        |         |          |         |       | IV-Alcohol clamp (IV-AC)   |       |       |       |       |   |                       |         |       |        |          |         |
|--------------------------|-------|------------|-----------------|------------|------------------------------------------------------|-------------|----------|---------|-----------------------------------------|---------|-------|-------|-------|-------|-----------------------|--------|---------|----------|---------|-------|----------------------------|-------|-------|-------|-------|---|-----------------------|---------|-------|--------|----------|---------|
|                          |       |            |                 |            |                                                      |             |          |         | Area Under the Curve (AUC)              |         |       |       |       |       | IV-Ghrelin or Placebo |        |         |          |         |       | Area Under the Curve (AUC) |       |       |       |       |   | IV-Ghrelin or Placebo |         |       |        |          |         |
|                          |       |            |                 |            |                                                      |             |          |         | p                                       | q       | d     | d     | d     | d     | Baseline              | IV-ASA | BrAc=0  | Baseline | Post-LD | IV-AC | p                          | q     | d     | d     | d     | d | Baseline              | Post-LD | IV-AC | BrAc=0 | Baseline | Post-LD |
| RPneg_484.20053_14.174   | RP    | neg        | 14.174          | 484.2005   |                                                      |             | 4        |         | 0.40832                                 | 0.71427 | -0.28 | 0.23  | -0.65 | 0.94  | -0.53                 | 0.03   | 0.34182 | 0.82691  | -0.20   | -0.74 | -0.18                      | -0.09 | -0.30 | 0.01  | 0.24  |   |                       |         |       |        |          |         |
| RPneg_484.24933_12.045   | RP    | neg        | 12.045          | 484.2493   |                                                      |             | 4        |         | 0.04905                                 | 0.34414 | -0.47 | -0.11 | 0.01  | -0.08 | -0.42                 | -0.20  | 0.84584 | 0.97710  | 0.07    | 0.14  | -0.22                      | 0.00  | -0.50 | 0.60  | 1.12  |   |                       |         |       |        |          |         |
| RPneg_484.26791_9.156    | RP    | neg        | 9.156           | 484.2679   |                                                      |             | 4        |         | 0.69353                                 | 0.87416 | -0.12 | -0.05 | 0.13  | 0.09  | -0.02                 | -0.23  | 0.12657 | 0.61763  | -0.30   | -0.48 | -0.44                      | -0.29 | -0.21 | -0.22 | 0.05  |   |                       |         |       |        |          |         |
| RPneg_484.26801_8.977    | RP    | neg        | 8.977           | 484.2680   |                                                      |             | 4        |         | 0.86761                                 | 0.95056 | -0.04 | -0.02 | 0.23  | 0.16  | 0.18                  | -0.21  | 0.27165 | 0.78271  | -0.16   | -0.58 | -0.05                      | -0.05 | -0.16 | 0.01  | 0.01  |   |                       |         |       |        |          |         |
| RPneg_484.28247_9.175    | RP    | neg        | 9.175           | 484.2824   | adduct of chenodeoxycholic acid<br>glycine conjugate | no autoMSMS | 4        |         | 0.00031                                 | 0.03332 | 0.80  | 0.12  | 1.06  | 0.93  | 1.27                  | 0.91   | 0.00000 | 0.00064  | 0.47    | -0.23 | 0.74                       | 0.95  | 0.44  | 0.39  | -0.43 |   |                       |         |       |        |          |         |
| HILICneg_484.28247_8.192 | RP    | neg        | 8.192           | 484.2825   |                                                      |             | 4        |         | 0.05964                                 | 0.36531 | 0.35  | 0.02  | 0.95  | 0.36  | 0.60                  | 0.34   | 0.32204 | 0.81567  | 0.17    | -0.29 | 0.33                       | 0.36  | 0.17  | 0.20  | -0.32 |   |                       |         |       |        |          |         |
| HILICneg_484.28247_1.06  | HILIC | neg        | 1.06            | 484.2826   |                                                      |             | 4        |         | 0.00023                                 | 0.02892 | 0.94  | 0.16  | 1.21  | 1.15  | 1.56                  | 1.48   | 0.09307 | 0.11145  | 0.57    | -0.29 | 0.83                       | 1.16  | 0.57  | 0.54  | -0.45 |   |                       |         |       |        |          |         |
| RPneg_484.28323_9.323    | RP    | neg        | 9.323           | 484.2832   |                                                      |             | 4        |         | 0.00140                                 | 0.07596 | 0.55  | 0.08  | 0.79  | 0.58  | 0.85                  | 1.04   | 0.20440 | 0.72067  | 0.56    | -0.31 | 0.73                       | 0.94  | 0.66  | 0.78  | -0.45 |   |                       |         |       |        |          |         |
| RPpos_484.2897_8.39      | RP    | pos        | 8.39            | 484.2897   |                                                      |             | 4        |         | 0.08975                                 | 0.41828 | 0.15  | 0.04  | 0.27  | 0.21  | 0.27                  | 0.21   | 0.03035 | 0.36384  | 0.16    | 0.03  | 0.12                       | 0.24  | 0.29  | 0.13  | 0.05  |   |                       |         |       |        |          |         |
| RPpos_484.2902_8.74      | RP    | pos        | 8.74            | 484.2902   |                                                      |             | 4        |         | 0.72431                                 | 0.88758 | 0.02  | 0.03  | 0.03  | 0.02  | 0.07                  | 0.11   | 0.35449 | 0.83325  | -0.03   | -0.04 | -0.04                      | -0.04 | 0.00  | -0.05 | -0.05 |   |                       |         |       |        |          |         |
| RPpos_484.291_8.26       | RP    | pos        | 8.26            | 484.2910   |                                                      |             | 4        |         | 0.15519                                 | 0.49790 | 0.26  | 0.20  | 0.51  | 0.46  | 0.49                  | -0.08  | 0.80492 | 0.97001  | 0.03    | -0.19 | -0.08                      | 0.15  | 0.24  | 0.08  | -0.13 |   |                       |         |       |        |          |         |
| RPpos_484.3266_10.37     | RP    | pos        | 10.37           | 484.3266   |                                                      |             | 4        |         | 0.29997                                 | 0.62947 | 0.21  | 0.47  | 0.69  | 0.59  | 0.06                  | -0.41  | 0.00002 | 0.00423  | 1.35    | 0.73  | 0.85                       | 1.32  | 1.84  | 1.51  | 0.71  |   |                       |         |       |        |          |         |
| HILICpos_484.3464_0.41   | HILIC | pos        | 0.41            | 484.3464   |                                                      | no autoMSMS | 4        |         | 0.50876                                 | 0.78161 | -0.11 | 0.26  | 0.25  | -0.04 | 0.15                  | -0.14  | 0.85945 | 0.97939  | -0.13   | 0.00  | -0.01                      | -0.01 | 0.04  | -0.44 | 0.61  |   |                       |         |       |        |          |         |
| HILICneg_485.1032_0.54   | HILIC | neg        | 0.54            | 485.1032   |                                                      |             | 4        |         | 0.25379                                 | 0.59219 | 0.36  | 0.40  | 0.10  | 0.43  | 0.43                  | 0.87   | 0.65683 | 0.94066  | 0.02    | -0.12 | -0.04                      | -0.02 | 1.17  | -0.12 | 0.70  |   |                       |         |       |        |          |         |
| RPneg_485.16629_5.716    | RP    | neg        | 5.716           | 485.1663   |                                                      |             | 4        |         | 0.92736                                 | 0.97411 | 0.18  | 0.23  | 0.31  | 0.40  | 0.41                  | -0.16  | 0.17305 | 0.68678  | -0.35   | -0.54 | -0.44                      | -0.19 | -0.37 | -0.19 | -0.12 |   |                       |         |       |        |          |         |
| HILICneg_485.1672_3.4    | HILIC | neg        | 3.4             | 485.1672   |                                                      |             | 4        |         | 0.65399                                 | 0.85451 | 0.06  | 0.07  | 0.28  | 0.23  | 0.06                  | -0.08  | 0.20826 | 0.72407  | -0.46   | -0.92 | -0.73                      | -0.08 | -0.29 | -0.05 | 0.16  |   |                       |         |       |        |          |         |
| RPneg_485.16721_11.251   | RP    | neg        | 11.251          | 485.1672   |                                                      |             | 4        |         | 0.09500                                 | 0.29493 | -0.57 | -0.10 | -0.77 | -0.20 | -0.15                 | -0.10  | 0.72782 | 0.92224  | -0.08   | -0.46 | 0.50                       | -0.69 | -0.31 | -0.36 | 0.81  |   |                       |         |       |        |          |         |
| HILICpos_485.1785_5.8    | HILIC | pos        | 5.8             | 485.1785   |                                                      |             | 4        |         | 0.58027                                 | 0.81839 | 0.18  | 0.70  | 0.58  | 0.32  | 0.20                  | -0.99  | 0.00672 | 0.17372  | 1.26    | 0.64  | 0.88                       | 1.57  | 0.85  | 1.05  | -0.03 |   |                       |         |       |        |          |         |
| RPpos_485.1998_6.75      | RP    | pos        | 6.75            | 485.1998   |                                                      |             | 4        |         | 0.99159                                 | 0.99727 | 0.00  | 0.33  | 0.22  | 0.06  | 0.51                  | 0.94   | 0.42136 | 0.65935  | 0.54    | 0.55  | 0.40                       | -0.26 | -0.38 | -0.02 | 0.29  |   |                       |         |       |        |          |         |
| RPneg_485.23016_10.002   | RP    | neg        | 10.002          | 485.2302   |                                                      |             | 4        |         | 0.50798                                 | 0.78115 | 0.05  | 0.11  | 0.15  | 0.09  | 0.17                  | 0.03   | 0.90627 | 0.98670  | 0.12    | 0.07  | 0.07                       | 0.14  | 0.16  | 0.13  | 0.07  |   |                       |         |       |        |          |         |
| HILICneg_485.2322_1.42   | HILIC | neg        | 1.42            | 485.2322   |                                                      |             | 4        |         | 0.78881                                 | 0.91739 | 0.06  | 0.07  | 0.14  | 0.06  | 0.22                  | 0.05   | 0.99542 | 0.99942  | 0.10    | 0.05  | 0.14                       | 0.03  | 0.13  | 0.10  | 0.13  |   |                       |         |       |        |          |         |
| RPpos_485.2952_11.08     | RP    | pos        | 11.08           | 485.2952   |                                                      |             | 4        |         | 0.14149                                 | 0.48104 | 0.19  | 0.22  | 0.08  | 0.22  | 0.43                  | 0.09   | 0.29795 | 0.79993  | -0.15   | -0.17 | -0.04                      | -0.29 | -0.02 | -0.22 | -0.15 |   |                       |         |       |        |          |         |
| HILICpos_485.3572_1.56   | HILIC | pos        | 1.56            | 485.3572   |                                                      |             | 4        |         | 0.20095                                 | 0.54562 | 0.23  | 0.17  | -0.03 | 0.33  | 0.81                  | 0.25   | 0.15538 | 0.66179  | 0.20    | 0.08  | 0.66                       | -0.93 | 0.19  | 0.20  | 0.34  |   |                       |         |       |        |          |         |
| HILICpos_485.3574_1.72   | HILIC | pos        | 1.72            | 485.3574   |                                                      |             | 4        |         | 0.25541                                 | 0.59371 | 0.20  | 0.10  | -0.09 | 0.33  | 0.92                  | 0.16   | 0.15656 | 0.66394  | 0.28    | 0.16  | 0.57                       | -0.65 | 0.26  | 0.46  | 0.33  |   |                       |         |       |        |          |         |
| RPpos_485.3611_11.86     | RP    | pos        | 11.86           | 485.3611   |                                                      |             | 4        |         | 0.03817                                 | 0.31554 | -0.27 | -0.25 | -0.27 | -0.40 | -0.07                 | 0.45   | 0.39568 | 0.85478  | -0.21   | -0.08 | -0.07                      | -0.11 | 0.17  | -0.02 | -0.34 |   |                       |         |       |        |          |         |
| RPpos_485.8015_7.71      | RP    | pos        | 7.71            | 485.8015   |                                                      |             | 4        |         | 0.12416                                 | 0.45941 | -0.36 | -0.32 | 0.54  | -0.49 | -0.19                 | 0.93   | 0.29295 | 0.79688  | -0.33   | -0.25 | 0.00                       | -0.38 | -0.09 | -0.32 | -0.39 |   |                       |         |       |        |          |         |
| HILICneg_485.9866_5.41   | HILIC | neg        | 5.41            | 485.9866   |                                                      |             | 4        |         | 0.74956                                 | 0.90015 | 0.09  | 0.10  | 0.35  | 0.01  | 0.33                  | 0.58   | 0.16540 | 0.67660  | 0.05    | -0.14 | 0.21                       | 0.10  | 0.08  | 0.16  | -0.67 |   |                       |         |       |        |          |         |
| RPneg_486.10162_11.113   | RP    | neg        | 11.113          | 486.1016   |                                                      |             | 4        |         | 0.02394                                 | 0.27292 | -0.77 | 0.33  | 0.05  | -0.46 | -1.11                 | 0.34   | 0.65493 | 0.94016  | 0.16    | 0.73  | -0.14                      | 0.47  | -0.14 | -0.01 | -0.07 |   |                       |         |       |        |          |         |
| RPpos_486.1375_7.41      | RP    | pos        | 7.41            | 486.1375   |                                                      |             | 4        |         | 0.74523                                 | 0.89857 | 0.06  | 0.07  | 0.22  | 0.21  | 0.33                  | 0.28   | 0.03669 | 0.37697  | 0.06    | 0.01  | 0.03                       | 0.06  | 0.18  | 0.08  | -0.11 |   |                       |         |       |        |          |         |
| HILICpos_486.2033_0.56   | HILIC | pos        | 0.56            | 486.2033   |                                                      |             | 4        |         | 0.02423                                 | 0.27422 | -0.46 | -0.24 | 0.10  | -0.23 | -0.55                 | 0.17   | 0.54150 | 0.91464  | 0.31    | 0.05  | 0.39                       | -0.37 | 0.46  | 0.29  | -0.22 |   |                       |         |       |        |          |         |
| RPpos_486.2319_8.77      | RP    | pos        | 8.77            | 486.2319   |                                                      |             | 4        |         | 0.35879                                 | 0.67767 | 0.42  | -0.02 | 0.80  | 1.07  | 0.22                  | -0.21  | 0.24999 | 0.76595  | 0.25    | 0.02  | 0.31                       | 0.47  | 0.40  | 0.36  | -0.48 |   |                       |         |       |        |          |         |
| RPpos_486.28024_13.188   | RP    | pos        | 13.188          | 486.2802   |                                                      |             | 4        |         | 0.29867                                 | 0.55161 | -0.37 | 0.28  | -0.45 | -0.32 | 0.21                  | -0.21  | 0.15197 | 0.65756  | -0.12   | 0.11  | -0.13                      | -0.20 | -0.09 | -0.14 | 0.16  |   |                       |         |       |        |          |         |
| HILICpos_486.3281_0.42   | HILIC | pos        | 0.42            | 486.3281   |                                                      |             | 4        |         | 0.83179                                 | 0.93648 | 0.10  | 0.34  | 0.53  | 0.18  | 0.16                  | 0.03   | 0.64214 | 0.93677  | -0.23   | -0.13 | 0.04                       | -0.10 | -0.25 | -0.50 | 0.68  |   |                       |         |       |        |          |         |
| HILICneg_487.0099_2.57   | HILIC | neg        | 2.57            | 487.0099   |                                                      |             | 4        |         | 0.03250                                 | 0.30133 | -0.57 | -0.19 | -0.51 | -0.08 | -0.57                 | 0.10   | 0.62647 | 0.93459  | -0.37   | -0.47 | 0.23                       | -0.63 | -0.94 | -0.11 | 0.27  |   |                       |         |       |        |          |         |
| RPneg_487.11359_8.326    | RP    | neg        | 8.326           | 487.1136   |                                                      |             | 4        |         | 0.20398                                 | 0.54850 | -0.37 | 0.35  | 0.36  | -0.39 | 0.39                  | 0.15   | 0.83317 | 0.97501  | -0.06   | -0.02 | 0.22                       | 0.03  | -0.15 | -0.01 | -0.21 |   |                       |         |       |        |          |         |
| HILICneg_487.1146_4.21   | HILIC | neg        | 4.21            | 487.1146   |                                                      |             | 4        |         | 0.18910                                 | 0.53570 | -0.21 | 0.16  | 0.42  | 0.09  | -0.70                 | -0.57  | 0.85168 | 0.97755  | -0.03   | 0.29  | 0.15                       | 0.09  | 0.02  | -0.10 | -0.54 |   |                       |         |       |        |          |         |
| HILICpos_487.1942_5.8    | HILIC | pos        | 5.8             | 487.1942   |                                                      |             | 4        |         | 0.88904                                 | 0.95968 | 0.05  | 0.41  | 0.53  | 0.40  | -0.02                 | -0.78  | 0.00822 | 0.19346  | 1.30    | 0.48  | 1.34                       | 1.13  | 1.79  | 0.78  | 0.22  |   |                       |         |       |        |          |         |
| RPneg_487.25537_8.48     | RP    | neg        | 8.48            | 487.2554   |                                                      |             | 4        |         | 0.92407                                 | 0.97276 | 0.05  | -0.03 | 0.72  | 0.20  | -0.41                 | -0.30  | 0.00492 | 0.14753  | 0.55    | -0.10 | 0.69                       | 0.97  | 0.55  | 0.40  | -0.36 |   |                       |         |       |        |          |         |
| RPneg_487.25656_12.668   | RP    | neg        | 12.668          | 487.2566   |                                                      |             | 4        |         | 0.10026                                 | 0.43177 | -0.31 | -0.02 | -0.41 | 0.16  | 0.03                  | -0.34  | 0.66562 | 0.94372  | 0.19    | -0.22 | -0.09                      | 0.54  | 0.43  | 0.13  | -0.06 |   |                       |         |       |        |          |         |
| RPpos_487.2746_5.2       | RP    | pos        | 5.2             | 487.2746   |                                                      |             | 4        |         | 0.31242                                 | 0.64041 | -0.20 | 0.36  | -0.07 | 0.07  | -0.14                 | -0.23  | 0.07215 | 0.51269  | -0.39   | -0.32 | -0.38                      | -0.74 | -0.39 | 0.16  | -0.44 |   |                       |         |       |        |          |         |
| RPpos_487.2811_9.87      | RP    | pos        | 9.87            | 487.2811   |                                                      |             | 4        |         | 0.21133                                 | 0.55412 | -0.29 | -0.02 | 0.01  | -0.32 | -0.13                 | -0.25  | 0.23468 | 0.75230  | -0.40   | -0.54 | -0.26                      | -0.46 | -0.35 | -0.65 | -0.26 |   |                       |         |       |        |          |         |
| RPneg_487.2912_10.375    | RP    | neg        | 10.375          | 487.2912   |                                                      |             | 4        |         | 0.37314                                 | 0.68884 | -0.09 | -0.10 | 0.57  | -0.27 | 0.26                  | 0.12   | 0.19850 | 0.71424  | 0.23    | -0.32 | 0.12                       | 0.05  | 0.67  | 0.19  | 0.45  |   |                       |         |       |        |          |         |
| RPneg_487.30539_5.08     | RP    | neg        | 5.08            | 487.3054   |                                                      |             | 4        |         | 0.96985                                 | 0.98857 | -0.02 | 0.14  | -0.36 | -0.07 | 0.22                  | 0.03   | 0.00690 | 0.17568  | 1.26    | 1.16  | 0.24                       | 0.01  | 1.24  | 5.55  | -0.46 |   |                       |         |       |        |          |         |
| HILICpos_487.3168_0.5    | HILIC | pos        | 0.5             | 487.3168   |                                                      |             | 4        |         | 0.57404                                 | 0.81586 | -0.15 | -0.27 | 0.66  | -0.03 | -0.30                 | 0.63   | 0.67262 | 0.94623  | 0.05    | 0.01  | 0.26                       | 0.19  | 0.09  | -0.51 | -0.15 |   |                       |         |       |        |          |         |
| RPpos_487.3171_7.27      | RP    | pos        | 7.27            | 487.3171   |                                                      |             | 4        |         | 0.73368                                 | 0.89218 | 0.07  | 0.39  | 0.51  | 0.51  | -0.05                 | 0.91   | 0.91793 | 0.98836  | 0.01    | 0.06  | 0.14                       | 0.24  | -0.26 | -0.24 | -0.37 |   |                       |         |       |        |          |         |
| RPpos_487.3181_7.58      | RP    | pos        | 7.58            | 487.3181   |                                                      |             | 4        |         | 0.64590                                 | 0.85037 | -0.12 | -0.17 | 0.63  | -0.07 | -0.35                 | 0.81   | 0.94271 | 0.99197  | -0.04   | 0.02  | 0.16                       | 0.12  | -0.05 | -0.65 | -0.13 |   |                       |         |       |        |          |         |
| RPneg_487.32559_9.832    | RP    | neg        | 9.83            |            |                                                      |             |          |         |                                         |         |       |       |       |       |                       |        |         |          |         |       |                            |       |       |       |       |   |                       |         |       |        |          |         |

|                        |       |            |                 |            |            |      |          |         |                            |         | IV-Alcohol self-administration (IV-ASA) |          |       |       |                       |       | IV-Alcohol clamp (IV-AC) |                            |       |       |          |       |       |                       |       |   |         |   |   |
|------------------------|-------|------------|-----------------|------------|------------|------|----------|---------|----------------------------|---------|-----------------------------------------|----------|-------|-------|-----------------------|-------|--------------------------|----------------------------|-------|-------|----------|-------|-------|-----------------------|-------|---|---------|---|---|
| Feature_ID             | Mode  | Ionization | Average_Rt.min. | Average_Mz | Metabolite | MSMS | ID_Level | HMDB_ID |                            |         |                                         |          |       |       |                       |       |                          |                            |       |       |          |       |       |                       |       |   |         |   |   |
|                        |       |            |                 |            |            |      |          |         | Area Under the Curve (AUC) |         |                                         | Baseline |       |       | IV-Ghrelin or Placebo |       |                          | Area Under the Curve (AUC) |       |       | Baseline |       |       | IV-Ghrelin or Placebo |       |   | Post-AC |   |   |
|                        |       |            |                 |            |            |      |          |         | p                          | q       | d                                       | d        | d     | d     | d                     | d     | p                        | q                          | d     | d     | d        | d     | d     | d                     | p     | q | d       | d | d |
| HILICpos_489.313_0.69  | HILIC | pos        | 0.69            | 489.3130   |            |      | 4        |         | 0.88256                    | 0.95651 | -0.07                                   | -0.26    | -0.13 | 0.30  | 1.73                  | 0.91  | 0.57405                  | 0.92259                    | -0.12 | -0.33 | 0.48     | 0.31  | 0.09  | -0.15                 | -0.52 |   |         |   |   |
| HILICpos_489.3134_0.64 | HILIC | pos        | 0.64            | 489.3134   |            |      | 4        |         | 0.16411                    | 0.50936 | -0.39                                   | -0.10    | 0.52  | -0.31 | -0.26                 | 0.63  | 0.12619                  | 0.61763                    | -0.30 | -0.44 | -0.28    | -0.28 | -0.03 | 0.19                  | -0.37 |   |         |   |   |
| RPpos_489.3142_6.39    | RP    | pos        | 6.39            | 489.3142   |            |      | 4        |         | 0.42693                    | 0.72836 | -0.30                                   | -0.11    | 1.14  | -0.14 | -0.23                 | 0.09  | 0.53703                  | 0.91447                    | 0.25  | 0.07  | 0.26     | 0.64  | 0.23  | 0.19                  | -0.64 |   |         |   |   |
| RPneg_489.34274_9.948  | RP    | neg        | 9.948           | 489.3427   |            |      | 4        |         | 0.40444                    | 0.71189 | 0.41                                    | 0.52     | 0.59  | 0.75  | 0.64                  | -0.11 | 0.24903                  | 0.76555                    | -0.37 | -0.36 | -0.36    | -0.38 | -0.36 | -0.36                 | -0.36 |   |         |   |   |
| RPneg_489.34348_10.016 | RP    | neg        | 10.016          | 489.3435   |            |      | 4        |         | 0.98230                    | 0.99327 | 0.29                                    | -0.18    | 0.21  | 0.14  | 0.39                  | -0.35 | 0.48076                  | 0.89841                    | -0.22 | -0.37 | -0.42    | -0.38 | -0.42 | -0.18                 | -0.05 |   |         |   |   |
| RPneg_489.34593_11.15  | RP    | neg        | 11.15           | 489.3460   |            |      | 4        |         | 0.48946                    | 0.66645 | 0.10                                    | -0.39    | 0.28  | 0.16  | 0.37                  | 0.23  | 0.46594                  | 0.87878                    | -0.19 | 0.27  | -0.38    | -0.19 | -0.16 | 0.14                  | -0.06 |   |         |   |   |
| RPneg_489.35724_10.736 | RP    | neg        | 10.736          | 489.3573   |            |      | 4        |         | 0.03230                    | 0.30900 | 0.42                                    | 0.09     | 0.26  | 0.51  | 0.68                  | 0.63  | 0.60393                  | 0.93874                    | -0.17 | 0.06  | -0.17    | 0.54  | -0.48 | -0.22                 | -0.19 |   |         |   |   |
| RPneg_489.3573_8.614   | RP    | neg        | 8.614           | 489.3573   |            |      | 4        |         | 0.08192                    | 0.40643 | 0.60                                    | 0.29     | 0.77  | 0.64  | 0.57                  | 0.92  | 0.46126                  | 0.88576                    | 0.55  | 0.62  | -0.88    | 0.61  | 0.67  | 0.38                  | -0.03 |   |         |   |   |
| HILICneg_489.3594_0.39 | HILIC | neg        | 0.39            | 489.3594   |            |      | 4        |         | 0.04854                    | 0.34268 | 0.57                                    | 0.31     | 0.28  | 0.65  | 1.24                  | 0.21  | 0.33331                  | 0.82231                    | -0.27 | -0.26 | -0.22    | -0.21 | -0.27 | -0.37                 | -0.15 |   |         |   |   |
| RPpos_489.7562_13.74   | RP    | pos        | 13.74           | 489.7562   |            |      | 4        |         | 0.18932                    | 0.53578 | 0.41                                    | 0.17     | 0.73  | 0.25  | 0.53                  | 2.43  | 0.80616                  | 0.97022                    | -0.08 | 0.59  | -0.18    | -0.07 | -0.05 | -0.16                 | 0.39  |   |         |   |   |
| RPpos_489.7968_7.58    | RP    | pos        | 7.58            | 489.7968   |            |      | 4        |         | 0.95232                    | 0.98259 | 0.01                                    | -0.13    | 0.75  | 0.00  | -0.28                 | 1.25  | 0.89505                  | 0.98465                    | -0.01 | -0.07 | 0.33     | 0.03  | -0.15 | -0.72                 | 0.05  |   |         |   |   |
| RPneg_490.16656_10.883 | RP    | neg        | 10.883          | 490.1666   |            |      | 4        |         | 0.40950                    | 0.71503 | -0.21                                   | 0.13     | 0.03  | -0.27 | 0.75                  | -0.18 | 0.97303                  | 0.99690                    | -0.02 | -0.13 | 0.31     | -0.41 | 0.09  | 0.03                  | -0.14 |   |         |   |   |
| RPpos_490.2071_7.19    | RP    | pos        | 7.19            | 490.2071   |            |      | 4        |         | 0.61597                    | 0.83654 | 0.11                                    | 0.22     | 0.31  | 0.33  | 0.21                  | -0.10 | 0.06090                  | 0.48165                    | 0.64  | 0.58  | 0.65     | 0.62  | 0.59  | 0.71                  | 0.71  |   |         |   |   |
| RPpos_490.2071_7.27    | RP    | pos        | 7.27            | 490.2071   |            |      | 4        |         | 0.45336                    | 0.74626 | 0.23                                    | 0.25     | 0.25  | 0.53  | 0.44                  | -0.06 | 0.21794                  | 0.73497                    | 0.60  | 0.55  | 0.37     | 0.57  | 0.66  | 0.88                  | 0.76  |   |         |   |   |
| HILICpos_490.2072_2.44 | HILIC | pos        | 2.44            | 490.2072   |            |      | 4        |         | 0.61260                    | 0.83447 | 0.11                                    | 0.18     | 0.26  | 0.37  | 0.21                  | -0.20 | 0.06666                  | 0.49796                    | 0.69  | 0.68  | 0.66     | 0.70  | 0.66  | 0.75                  | 0.66  |   |         |   |   |
| HILICpos_490.2279_0.83 | HILIC | pos        | 0.83            | 490.2279   |            |      | 4        |         | 0.59616                    | 0.82679 | 0.16                                    | 0.32     | 1.05  | 0.01  | 0.57                  | 0.00  | 0.26207                  | 0.77484                    | 0.54  | 0.83  | 0.73     | 0.30  | 0.64  | -0.15                 | -0.41 |   |         |   |   |
| HILICpos_490.2853_0.43 | HILIC | pos        | 0.43            | 490.2853   |            |      | 4        |         | 0.87783                    | 0.95423 | 0.04                                    | 0.11     | 0.26  | 0.20  | 0.09                  | 0.95  | 0.28232                  | 0.97425                    | -0.11 | -0.06 | -0.09    | -0.07 | -0.06 | -0.38                 | -0.21 |   |         |   |   |
| RPpos_490.2858_4.68    | RP    | pos        | 4.68            | 490.2858   |            |      | 4        |         | 0.73573                    | 0.89335 | 0.03                                    | 0.00     | 0.33  | 0.29  | 0.06                  | 0.18  | 0.77552                  | 0.96548                    | -0.11 | 0.15  | -0.33    | 0.02  | -0.01 | -0.42                 | -0.23 |   |         |   |   |
| HILICpos_490.2859_1.73 | HILIC | pos        | 1.73            | 490.2859   |            |      | 4        |         | 0.35338                    | 0.67284 | 0.22                                    | -0.03    | 0.55  | 0.29  | 0.49                  | 0.52  | 0.80956                  | 0.97112                    | -0.09 | 0.49  | -0.12    | -0.12 | 0.18  | -0.13                 | -0.26 |   |         |   |   |
| RPpos_490.2864_4.79    | RP    | pos        | 4.79            | 490.2864   |            |      | 4        |         | 0.45806                    | 0.74973 | 0.19                                    | -0.06    | 0.55  | 0.29  | 0.57                  | 0.31  | 0.98203                  | 0.99752                    | 0.00  | -0.13 | 0.02     | -0.02 | 0.14  | -0.09                 | -0.18 |   |         |   |   |
| RPpos_490.2897_9.86    | RP    | pos        | 9.86            | 490.2897   |            |      | 4        |         | 0.15237                    | 0.49506 | -0.33                                   | -0.08    | -0.11 | -0.19 | -0.17                 | 0.23  | 0.18749                  | 0.70230                    | -0.38 | -0.33 | -0.38    | -0.57 | -0.42 | -0.54                 | -0.17 |   |         |   |   |
| RPpos_490.3222_5.4     | RP    | pos        | 5.4             | 490.3222   |            |      | 4        |         | 0.95937                    | 0.98572 | -0.06                                   | -0.05    | 0.54  | 0.05  | 0.10                  | 0.62  | 0.48781                  | 0.89808                    | -0.24 | -0.15 | -0.08    | -0.11 | -0.20 | -0.64                 | -0.31 |   |         |   |   |
| HILICpos_490.3432_0.37 | HILIC | pos        | 0.37            | 490.3432   |            |      | 4        |         | 0.74008                    | 0.89551 | 0.15                                    | 1.91     | 0.04  | 1.59  | -0.40                 | -0.21 | 0.00160                  | 0.07632                    | -0.55 | -0.26 | -0.04    | 0.37  | -0.16 | -0.50                 | -0.35 |   |         |   |   |
| RPpos_490.4241_12.21   | RP    | pos        | 12.21           | 490.4241   |            |      | 4        |         | 0.52365                    | 0.78956 | -0.18                                   | 0.22     | 0.26  | -0.50 | 0.19                  | -0.08 | 0.29774                  | 0.79993                    | 0.25  | 0.34  | 0.30     | 0.19  | 0.28  | 0.19                  | -0.07 |   |         |   |   |
| RPpos_490.4244_12.61   | RP    | pos        | 12.61           | 490.4244   |            |      | 4        |         | 0.72077                    | 0.88621 | -0.10                                   | 0.45     | 0.02  | -0.31 | 0.28                  | 0.12  | 0.15358                  | 0.65936                    | 0.25  | 0.25  | 0.29     | 0.16  | 0.30  | 0.29                  | 0.04  |   |         |   |   |
| RPneg_491.09006_7.71   | RP    | neg        | 7.71            | 491.0901   |            |      | 4        |         | 0.27124                    | 0.60722 | -0.35                                   | 0.17     | 0.36  | 0.06  | -0.19                 | -0.07 | 0.48241                  | 0.89580                    | -0.22 | 0.30  | 0.41     | -0.15 | -0.23 | 0.86                  | -0.67 |   |         |   |   |
| RPneg_491.09024_7.605  | RP    | neg        | 7.605           | 491.0902   |            |      | 4        |         | 0.46183                    | 0.75239 | -0.29                                   | 0.22     | 0.20  | 0.40  | 0.09                  | 0.16  | 0.77717                  | 0.96537                    | -0.03 | 0.47  | -0.04    | 0.03  | -0.24 | 0.09                  | -0.19 |   |         |   |   |
| RPneg_491.12497_2.811  | RP    | neg        | 2.811           | 491.1250   |            |      | 4        |         | 0.18029                    | 0.52571 | -0.26                                   | 0.10     | 0.38  | -0.18 | -0.58                 | -0.48 | 0.98882                  | 0.99810                    | -0.05 | -0.09 | 0.07     | 0.07  | 0.14  | -0.22                 | -0.33 |   |         |   |   |
| HILICpos_491.1588_0.56 | HILIC | pos        | 0.56            | 491.1588   |            |      | 4        |         | 0.00909                    | 0.18735 | -0.55                                   | -0.25    | 0.13  | -0.27 | -0.75                 | -0.07 | 0.51571                  | 0.90686                    | 0.35  | 0.06  | 0.41     | -0.61 | 0.63  | 0.30                  | -0.12 |   |         |   |   |
| RPpos_491.1976_8.14    | RP    | pos        | 8.14            | 491.1976   |            |      | 4        |         | 0.33285                    | 0.65659 | -0.09                                   | -0.19    | 0.00  | -0.07 | 0.03                  | -0.06 | 0.35205                  | 0.83205                    | 0.08  | 0.06  | 0.12     | -0.06 | 0.06  | 0.26                  | 0.13  |   |         |   |   |
| RPneg_491.21045_8.84   | RP    | neg        | 8.84            | 491.2105   |            |      | 4        |         | 0.02089                    | 0.26101 | 0.47                                    | 0.62     | 0.60  | 0.36  | 0.66                  | 0.13  | 0.08733                  | 0.54647                    | 0.80  | -0.10 | 0.50     | 1.05  | 1.09  | 1.50                  | 0.91  |   |         |   |   |
| RPneg_491.22766_8.479  | RP    | neg        | 8.479           | 491.2277   |            |      | 4        |         | 0.52809                    | 0.79225 | -0.18                                   | 0.03     | 0.61  | -0.16 | -0.48                 | -0.07 | 0.58235                  | 0.94835                    | 0.14  | -0.16 | 0.54     | -0.19 | 0.39  | -0.16                 | -0.15 |   |         |   |   |
| RPneg_491.2639_7.06    | RP    | neg        | 7.06            | 491.2639   |            |      | 4        |         | 0.00118                    | 0.05920 | 0.04                                    | 0.03     | 0.95  | 1.03  | 1.87                  | 1.04  | 0.00801                  | 0.19020                    | 0.46  | -0.35 | -0.18    | 0.14  | 0.96  | 1.13                  | 0.69  |   |         |   |   |
| RPneg_491.28586_9.212  | RP    | neg        | 9.212           | 491.2859   |            |      | 4        |         | 0.00025                    | 0.03000 | 0.67                                    | 0.34     | 1.06  | 1.17  | 0.23                  | 0.35  | 0.09577                  | 0.56432                    | 0.35  | 0.17  | 0.39     | 0.69  | 0.28  | 0.25                  | -0.26 |   |         |   |   |
| RPneg_491.28732_8.999  | RP    | neg        | 8.999           | 491.2873   |            |      | 4        |         | 0.00015                    | 0.02351 | 0.93                                    | 0.29     | 2.53  | 1.07  | 0.16                  | 0.33  | 0.09168                  | 0.55754                    | 0.34  | 0.09  | 0.33     | 0.84  | 0.23  | 0.29                  | -0.44 |   |         |   |   |
| RPneg_491.30206_9.27   | RP    | neg        | 9.27            | 491.3021   |            |      | 4        |         | 0.04246                    | 0.32848 | -0.61                                   | -0.44    | -0.46 | -0.49 | -0.69                 | -0.32 | 0.02175                  | 0.31168                    | -0.47 | -0.53 | -0.55    | -0.67 | -0.41 | -0.35                 | -0.40 |   |         |   |   |
| RPneg_491.32251_8.944  | RP    | neg        | 8.944           | 491.3225   |            |      | 4        |         | 0.50969                    | 0.78230 | 0.22                                    | 0.50     | 0.37  | 0.25  | 0.42                  | 0.00  | 0.96187                  | 0.99559                    | -0.04 | -0.06 | -0.09    | 0.03  | -0.06 | 0.00                  | -0.05 |   |         |   |   |
| RPpos_491.3707_11.08   | RP    | pos        | 11.08           | 491.3707   |            |      | 4        |         | 0.34929                    | 0.66985 | 0.14                                    | 0.07     | 0.35  | 0.08  | 0.42                  | 0.55  | 0.63239                  | 0.93546                    | -0.13 | -0.05 | -0.13    | -0.06 | -0.35 | 0.08                  | -0.01 |   |         |   |   |
| RPneg_491.37384_11.785 | RP    | neg        | 11.785          | 491.3738   |            |      | 4        |         | 0.26238                    | 0.59993 | -0.36                                   | 0.04     | -0.04 | 0.02  | -0.10                 | 0.43  | 0.09084                  | 0.55537                    | -0.33 | -0.65 | -0.02    | 0.72  | -0.71 | -0.31                 | -0.06 |   |         |   |   |
| HILICneg_491.3759_0.39 | HILIC | neg        | 0.39            | 491.3759   |            |      | 4        |         | 0.06188                    | 0.36878 | 0.50                                    | 0.14     | 0.21  | 0.38  | 1.38                  | 0.12  | 0.68436                  | 0.94844                    | -0.11 | -0.14 | -0.11    | -0.04 | -0.17 | -0.09                 | 0.05  |   |         |   |   |
| HILICpos_491.4409_3.6  | HILIC | pos        | 3.6             | 491.4409   |            |      | 4        |         | 0.69239                    | 0.87364 | 0.07                                    | 0.03     | 0.30  | 0.48  | 0.50                  | -0.84 | 0.03409                  | 0.37841                    | 0.46  | -0.02 | 0.18     | 0.27  | 0.45  | 0.73                  | 0.54  |   |         |   |   |
| HILICneg_491.7687_1.45 | HILIC | neg        | 1.45            | 491.7687   |            |      | 4        |         | 0.46218                    | 0.75260 | -0.13                                   | 0.26     | 0.13  | -0.06 | -0.10                 | 0.04  | 0.93654                  | 0.99013                    | 0.05  | -0.13 | 0.31     | -0.12 | -0.34 | 0.40                  | 0.27  |   |         |   |   |
| RPpos_491.7926_6.39    | RP    | pos        | 6.39            | 491.7926   |            |      | 4        |         | 0.61895                    | 0.83808 | -0.18                                   | -0.02    | 0.95  | 0.42  | -0.26                 | -0.10 | 0.50600                  | 0.90356                    | 0.26  | 0.36  | 0.24     | 0.59  | 0.18  | 0.17                  | -0.51 |   |         |   |   |
| RPneg_492.11954_9.917  | RP    | neg        | 9.917           | 492.1195   |            |      | 4        |         | 0.71647                    | 0.88460 | -0.07                                   | 0.57     | 0.33  | -0.04 | -0.12                 | -0.65 | 0.80942                  | 0.97112                    | 0.10  | -0.69 | 0.32     | 0.34  | 0.08  | 0.30                  | -0.63 |   |         |   |   |
| RPneg_492.1517_5.701   | RP    | neg        | 5.701           | 492.1517   |            |      | 4        |         | 0.20022                    | 0.54486 | 0.30                                    | 0.32     | 0.31  | 0.38  | 0.39                  | 0.28  | 0.08668                  | 0.54471                    | 0.14  | 0.10  | 0.08     | 0.18  | 0.20  | 0.13                  | 0.18  |   |         |   |   |
| RPpos_492.2121_11.73   | RP    | pos        | 11.73           | 492.2121   |            |      | 4        |         | 0.69443                    | 0.85174 | 0.31                                    | 0.53     | 0.14  | 0.47  | 0.56                  | -0.26 | 0.21535                  | 0.73170                    | 0.57  | 0.63  | 0.70     | 0.59  | 0.63  | 0.35                  | 0.06  |   |         |   |   |
| HILICpos_492.307_1.32  | HILIC | pos        | 1.32            | 492.3070   |            |      | 4        |         | 0.13654                    | 0.47649 | -0.32                                   | -0.06    | -0.08 | -0.05 | -0.36                 | -0.14 | 0.47370                  | 0.89116                    | -0.06 | -0.21 | -0.05    | -0.27 | 0.18  | 0.04                  | 0.04  |   |         |   |   |
| RPpos_492.3072_9.71    | RP    | pos        | 9.71            | 492.3072   |            |      | 4        |         | 0.04525                    | 0.33570 | -0.34                                   | 0.01     | -0.01 | -0.19 | -0.45                 | 0.37  | 0.66073                  | 0.94264                    | -0.09 | -0.08 | 0.04     | -0.33 | -0.34 | 0.17                  | 0.05  |   |         |   |   |
| RPneg_492.30914_10.77  | RP    | neg        | 10.77           | 492.3091   |            |      | 4        |         | 0.13948                    | 0.47911 | -0.35                                   | -0.05    | 0.0   |       |                       |       |                          |                            |       |       |          |       |       |                       |       |   |         |   |   |



| Feature_ID              | Mode  | Ionization | Average_Rt.min. | Average_Mz | Metabolite | MSMS | ID_Level    | HMDB_ID  | IV-Alcohol self-administration (IV-ASA) |       |        |       |       |                       |       |                       |         |       | IV-Alcohol clamp (IV-AC)   |       |       |       |       |                       |   |                       |   |   |
|-------------------------|-------|------------|-----------------|------------|------------|------|-------------|----------|-----------------------------------------|-------|--------|-------|-------|-----------------------|-------|-----------------------|---------|-------|----------------------------|-------|-------|-------|-------|-----------------------|---|-----------------------|---|---|
|                         |       |            |                 |            |            |      |             |          | Area Under the Curve (AUC)              |       |        |       |       | IV-Ghrelin or Placebo |       |                       |         |       | Area Under the Curve (AUC) |       |       |       |       | IV-Ghrelin or Placebo |   |                       |   |   |
|                         |       |            |                 |            |            |      |             |          | Baseline                                |       | IV-ASA |       |       | Baseline              |       | IV-Ghrelin or Placebo |         |       | Baseline                   |       | IV-AC |       |       | Baseline              |   | IV-Ghrelin or Placebo |   |   |
|                         |       |            |                 |            |            |      |             |          | p                                       | q     | d      | d     | d     | d                     | d     | d                     | d       | d     | p                          | q     | d     | d     | d     | d                     | d | d                     | d | d |
| RPneg_495.22409_7.089   | RP    | neg        | 7.089           | 495.2241   |            | 4    |             | 0.75511  | 0.90291                                 | -0.09 | 0.52   | -0.14 | 0.70  | -0.52                 | 0.07  | 0.82918               | 0.97442 | 0.18  | 1.18                       | 0.14  | -0.43 | -0.25 | 2.58  | -0.47                 |   |                       |   |   |
| RPneg_495.25949_10.003  | RP    | neg        | 10.003          | 495.2595   |            | 4    |             | 0.44219  | 0.73848                                 | 0.03  | 0.01   | 0.07  | 0.02  | 0.19                  | 0.09  | 0.95885               | 0.99539 | 0.08  | 0.01                       | 0.00  | 0.11  | 0.21  | 0.20  | -0.08                 |   |                       |   |   |
| RPneg_495.27872_9.674   | RP    | neg        | 9.674           | 495.2787   |            | 4    |             | 0.09999  | 0.43115                                 | -0.21 | -0.19  | -0.05 | -0.14 | -0.16                 | -0.35 | 0.49093               | 0.89836 | 0.25  | 0.21                       | -0.02 | 0.55  | 0.59  | 0.03  | -0.05                 |   |                       |   |   |
| RPneg_495.29688_8.93    | RP    | neg        | 8.93            | 495.2969   |            | 4    |             | 1.28E-05 | 0.00621                                 | 0.02  | 0.03   | 0.14  | 0.07  | 0.15                  | -0.17 | 0.19927               | 0.71502 | 0.26  | -0.17                      | 0.09  | 0.36  | 0.50  | 0.37  | 0.06                  |   |                       |   |   |
| RPneg_495.29724_8.861   | RP    | neg        | 8.861           | 495.2972   |            | 4    |             | 0.09994  | 0.41993                                 | 0.49  | 0.79   | 0.12  | 0.68  | 0.83                  | 0.14  | 0.66315               | 0.93385 | 0.09  | 0.07                       | 0.09  | 0.39  | 0.66  | 0.07  | -0.43                 |   |                       |   |   |
| HILICneg_495.31347_0.47 | HILIC | pos        | 0.47            | 495.3135   |            | 4    |             | 0.44639  | 0.74193                                 | 0.01  | -0.31  | 0.68  | 0.13  | -0.01                 | -0.04 | 0.49808               | 0.90077 | -0.02 | -0.39                      | 0.27  | 0.00  | 0.14  | -0.30 | -0.02                 |   |                       |   |   |
| HILICneg_495.3138_0.39  | HILIC | neg        | 0.39            | 495.3138   |            | 4    |             | 0.28466  | 0.61825                                 | 0.17  | 0.11   | 0.20  | 0.11  | 0.83                  | -0.23 | 0.01406               | 0.25288 | 0.30  | 0.29                       | 0.27  | 0.30  | 0.24  | 0.29  | 0.30                  |   |                       |   |   |
| RPpos_495.3147_9.18     | RP    | pos        | 9.18            | 495.3147   |            | 4    |             | 0.98924  | 0.99603                                 | -0.10 | -0.22  | 0.41  | -0.05 | -0.10                 | -0.10 | 0.81910               | 0.97238 | -0.02 | -0.22                      | 0.09  | 0.07  | 0.17  | -0.31 | -0.06                 |   |                       |   |   |
| RPneg_495.32269_13.183  | RP    | neg        | 13.183          | 495.3227   |            | 4    |             | 0.23028  | 0.57179                                 | -0.35 | 0.52   | -0.08 | -0.36 | 0.02                  | 0.13  | 0.58251               | 0.92442 | -0.11 | 0.58                       | -0.66 | 0.13  | 0.31  | -0.05 | -0.49                 |   |                       |   |   |
| RPneg_495.34705_11.356  | RP    | neg        | 11.356          | 495.3471   |            | 4    |             | 0.18765  | 0.53402                                 | 0.07  | 0.17   | 0.28  | 0.03  | 0.60                  | 0.04  | 0.30047               | 0.80242 | 0.16  | 0.17                       | 0.39  | -0.06 | 0.36  | 0.07  | -0.14                 |   |                       |   |   |
| RPpos_495.4878_11.58    | RP    | pos        | 11.58           | 495.4878   |            | 4    |             | 0.52584  | 0.79112                                 | -0.19 | 0.12   | 0.10  | -0.02 | 0.02                  | -1.00 | 0.76137               | 0.96260 | 0.09  | 1.07                       | -0.12 | 0.36  | -0.40 | 0.07  | 0.09                  |   |                       |   |   |
| HILICneg_495.4923_5.42  | HILIC | neg        | 5.42            | 495.4923   |            | 4    |             | 0.02494  | 0.27704                                 | -0.70 | -0.15  | -0.16 | -0.54 | -0.25                 | -0.60 | 0.51463               | 0.90649 | 0.25  | 0.66                       | 0.48  | 0.18  | 0.03  | -0.21 | 1.14                  |   |                       |   |   |
| RPneg_496.12265_11.193  | RP    | neg        | 11.193          | 496.1227   |            | 4    |             | 0.06280  | 0.37040                                 | 0.64  | 0.06   | 0.56  | 0.92  | 1.29                  | -0.41 | 0.94572               | 0.99233 | -0.05 | -0.30                      | 0.44  | -0.27 | -0.06 | -0.16 | 0.05                  |   |                       |   |   |
| RPpos_496.162_6.31      | RP    | pos        | 6.31            | 496.1620   |            | 4    |             | 0.37805  | 0.69307                                 | 0.20  | 0.30   | 0.34  | 0.25  | 0.32                  | 0.12  | 0.13779               | 0.63748 | 0.47  | 0.44                       | 0.43  | 0.44  | 0.45  | 0.60  | 0.47                  |   |                       |   |   |
| HILICpos_496.1638_4.06  | HILIC | pos        | 4.06            | 496.1638   |            | 4    |             | 0.33162  | 0.65566                                 | 0.24  | 0.28   | 0.36  | 0.28  | 0.36                  | 0.22  | 0.19383               | 0.70866 | 0.44  | 0.54                       | 0.37  | 0.46  | 0.39  | 0.52  | 0.47                  |   |                       |   |   |
| RPneg_496.27374_8.024   | RP    | neg        | 8.024           | 496.2737   |            | 4    |             | 0.03342  | 0.30338                                 | 0.65  | 0.24   | 1.00  | 0.69  | 0.86                  | 0.51  | 0.50542               | 0.90356 | -0.30 | -0.67                      | -0.22 | 0.00  | -0.12 | -0.18 | -0.77                 |   |                       |   |   |
| RPneg_496.27399_8.458   | RP    | neg        | 8.458           | 496.2740   |            | 4    |             | 0.00104  | 0.06542                                 | 1.80  | 0.64   | 4.63  | 1.84  | 0.93                  | 1.14  | 0.25539               | 0.77077 | 0.59  | -0.18                      | 0.82  | 1.15  | 0.51  | 0.63  | -0.23                 |   |                       |   |   |
| RPpos_496.2759_5.77     | RP    | pos        | 5.77            | 496.2759   |            | 4    |             | 0.40965  | 0.71509                                 | -0.36 | 0.19   | 0.32  | -0.11 | 0.77                  | -0.02 | 0.57877               | 0.93253 | -0.18 | 0.82                       | -0.37 | 0.02  | 0.02  | -0.77 | -0.22                 |   |                       |   |   |
| RPneg_496.30203_8.825   | RP    | neg        | 8.825           | 496.3020   |            | 4    |             | 0.19506  | 0.54017                                 | -0.33 | -0.14  | -0.17 | -0.21 | -0.28                 | -0.39 | 0.13021               | 0.62376 | 0.04  | 0.03                       | 0.09  | 0.07  | 0.38  | 0.22  | 0.05                  |   |                       |   |   |
| HILICpos_496.3025_0.47  | HILIC | pos        | 0.47            | 496.3025   |            | 4    |             | 0.79087  | 0.91828                                 | 0.00  | 0.38   | 0.06  | 0.22  | 0.03                  | 0.48  | 0.83200               | 0.97500 | -0.02 | -0.34                      | 0.02  | 0.22  | 0.02  | 0.07  | -0.16                 |   |                       |   |   |
| RPneg_496.30521_10.529  | RP    | neg        | 10.529          | 496.3052   |            | 4    |             | 0.11895  | 0.45527                                 | -0.46 | -0.05  | -0.07 | -0.21 | -0.39                 | -0.88 | 0.46520               | 0.88765 | -0.10 | -0.11                      | -0.10 | 0.07  | 0.01  | -0.10 | -0.34                 |   |                       |   |   |
| RPpos_496.3118_8.45     | RP    | pos        | 8.45            | 496.3118   |            | 4    |             | 0.51009  | 0.78257                                 | -0.19 | -0.40  | 0.39  | -0.28 | -0.16                 | 0.05  | 0.75712               | 0.96233 | -0.11 | -0.01                      | 0.05  | 0.25  | 0.56  | -1.20 | -0.67                 |   |                       |   |   |
| HILICpos_496.3123_0.54  | HILIC | pos        | 0.54            | 496.3123   |            | 4    |             | 0.29763  | 0.62808                                 | 0.17  | 0.28   | 0.47  | 0.18  | 0.36                  | 0.67  | 0.87026               | 0.98074 | 0.07  | -0.13                      | 0.18  | 0.03  | -0.09 | 0.37  | 0.01                  |   |                       |   |   |
| HILICpos_496.3393_1.26  | HILIC | pos        | 1.26            | 496.3393   |            | 4    |             | 0.02274  | 0.26757                                 | -0.42 | 0.07   | -0.06 | -0.27 | -0.25                 | -0.36 | 0.08509               | 0.54143 | -0.13 | -0.05                      | -0.11 | -0.21 | 0.03  | -0.15 | -0.20                 |   |                       |   |   |
| HILICpos_496.3394_1.14  | HILIC | pos        | 1.14            | 496.3394   |            | 4    |             | 0.00457  | 0.13604                                 | -0.43 | 0.17   | -0.08 | -0.31 | -0.35                 | -0.40 | 0.41522               | 0.86524 | 0.04  | -0.02                      | -0.02 | 0.28  | 0.16  | 0.02  | -0.10                 |   |                       |   |   |
| RPpos_496.3394_9.14     | RP    | pos        | 9.14            | 496.3394   |            | 4    |             | 0.91821  | 0.97030                                 | -0.10 | -0.05  | 0.04  | -0.01 | 0.22                  | -0.25 | 0.24366               | 0.75938 | -0.11 | 0.40                       | 0.20  | -0.32 | -0.14 | -0.23 | -0.18                 |   |                       |   |   |
| RPpos_496.341_11.08     | RP    | pos        | 11.08           | 496.3410   |            | 4    | no autoMSMS | 0.00049  | 0.04168                                 | -0.54 | -0.05  | -0.24 | -0.26 | -0.17                 | -0.42 | 0.07795               | 0.52501 | -0.24 | -0.12                      | -0.63 | -0.43 | 0.52  | 0.10  | -0.48                 |   |                       |   |   |
| RPneg_497.06879_2.811   | RP    | neg        | 2.811           | 497.0688   |            | 4    |             | 0.16762  | 0.51288                                 | -0.19 | 0.15   | 0.58  | -0.06 | -0.71                 | -0.56 | 0.86568               | 0.98005 | -0.01 | 0.04                       | 0.03  | 0.20  | 0.07  | -0.11 | -0.46                 |   |                       |   |   |
| RPneg_497.11649_7.429   | RP    | neg        | 7.429           | 497.1165   |            | 4    |             | 0.89014  | 0.95991                                 | 0.03  | 0.03   | 0.24  | 0.21  | 0.24                  | 0.13  | 0.04992               | 0.44537 | 0.04  | -0.11                      | 0.02  | 0.04  | 0.15  | 0.14  | -0.09                 |   |                       |   |   |
| HILICneg_497.1382_6.17  | HILIC | neg        | 6.17            | 497.1382   |            | 4    |             | 0.55250  | 0.80521                                 | 0.10  | 0.26   | 0.59  | 0.06  | 0.14                  | 0.05  | 0.15130               | 0.65995 | 0.29  | 0.32                       | 0.23  | 0.53  | 0.51  | 0.12  | -0.30                 |   |                       |   |   |
| RPneg_497.16605_11.195  | RP    | neg        | 11.195          | 497.1661   |            | 4    |             | 0.10485  | 0.43784                                 | 0.63  | 0.09   | 0.43  | 0.98  | 1.88                  | -0.53 | 0.63424               | 0.93546 | 0.07  | -0.28                      | 0.47  | 0.02  | 0.17  | -0.06 | 0.05                  |   |                       |   |   |
| RPneg_497.1665_7.036    | RP    | neg        | 7.036           | 497.1665   |            | 4    |             | 0.75062  | 0.90069                                 | 0.12  | -0.10  | 0.15  | 0.26  | 0.34                  | -0.18 | 0.28892               | 0.79431 | -0.33 | -0.36                      | -0.39 | -0.30 | 0.29  | -0.27 | -0.25                 |   |                       |   |   |
| HILICpos_497.2584_9.44  | HILIC | pos        | 9.44            | 497.2584   |            | 4    |             | 0.94658  | 0.98034                                 | 0.03  | 0.14   | 0.57  | 0.08  | 0.60                  | -0.31 | 0.31566               | 0.81238 | -0.21 | 0.75                       | 0.24  | -0.40 | 0.88  | 0.00  | -0.16                 |   |                       |   |   |
| RPpos_497.2599_5.97     | RP    | pos        | 5.97            | 497.2599   |            | 4    |             | 0.57211  | 0.81512                                 | -0.09 | 0.07   | 0.75  | -0.17 | 0.44                  | 0.28  | 0.72651               | 0.95612 | -0.11 | 0.32                       | 0.05  | 0.17  | 0.06  | -0.30 | -0.30                 |   |                       |   |   |
| RPneg_497.27463_8.133   | RP    | neg        | 8.133           | 497.2746   |            | 4    |             | 0.58639  | 0.82174                                 | -0.08 | 0.12   | 0.05  | -0.08 | 0.04                  | -0.38 | 0.15364               | 0.65938 | 1.63  | 1.81                       | 1.78  | 1.53  | 2.08  | 1.45  | 1.17                  |   |                       |   |   |
| RPneg_497.27618_8.531   | RP    | neg        | 8.531           | 497.2762   |            | 4    |             | 0.91973  | 0.97069                                 | 0.07  | 0.27   | 0.13  | 0.08  | 0.48                  | -0.31 | 0.41365               | 0.86469 | 0.21  | 0.37                       | 0.20  | 0.32  | 0.22  | 0.20  | 0.26                  |   |                       |   |   |
| RPneg_497.28876_9.886   | RP    | neg        | 9.886           | 497.2888   |            | 4    |             | 0.00530  | 0.14359                                 | -0.69 | -0.25  | -0.43 | -0.25 | -0.28                 | -0.44 | 0.00099               | 0.05687 | -0.55 | -0.10                      | -0.31 | -0.59 | -0.85 | -0.62 | -0.58                 |   |                       |   |   |
| RPneg_497.3325_5.08     | RP    | neg        | 5.08            | 497.3326   |            | 4    |             | 0.79804  | 0.92200                                 | -0.09 | 0.37   | -0.35 | -0.08 | 0.11                  | -0.08 | 0.00495               | 0.14811 | 1.40  | 1.00                       | 0.37  | 0.02  | 1.38  | 5.78  | -0.41                 |   |                       |   |   |
| RPneg_497.34732_9.492   | RP    | neg        | 9.492           | 497.3473   |            | 4    |             | 0.66052  | 0.85781                                 | -0.13 | -0.30  | -0.02 | -0.01 | -0.18                 | 0.49  | 0.21748               | 0.73427 | 0.38  | 0.24                       | 0.53  | -0.22 | 0.73  | 0.06  | 0.26                  |   |                       |   |   |
| RPpos_497.6506_9.28     | RP    | pos        | 9.28            | 497.6506   |            | 4    |             | 0.78834  | 0.91708                                 | -0.06 | 0.06   | 0.35  | -0.13 | -0.02                 | -0.17 | 0.48082               | 0.89488 | -0.06 | -0.36                      | 0.00  | 0.03  | -0.11 | -0.08 | 0.07                  |   |                       |   |   |
| RPneg_498.17703_7.503   | RP    | neg        | 7.503           | 498.1770   |            | 4    |             | 0.04351  | 0.33163                                 | 0.42  | 0.10   | 0.51  | 0.51  | 0.87                  | 0.50  | 0.00018               | 0.01851 | 0.32  | -0.10                      | -0.03 | 0.34  | 0.79  | 0.61  | -0.01                 |   |                       |   |   |
| RPneg_498.17825_14.182  | RP    | neg        | 14.182          | 498.1783   |            | 4    |             | 0.37840  | 0.69331                                 | -0.29 | -0.13  | -0.51 | 1.06  | -0.84                 | -0.10 | 0.43283               | 0.87530 | -0.11 | -0.50                      | -0.17 | 0.32  | -0.22 | -0.33 | 0.20                  |   |                       |   |   |
| RPneg_498.17862_12.992  | RP    | neg        | 12.992          | 498.1786   |            | 4    |             | 0.86125  | 0.94810                                 | -0.07 | -0.19  | -0.24 | 0.46  | -0.16                 | 0.20  | 0.80442               | 0.96991 | -0.15 | 0.10                       | -0.13 | 0.15  | -0.40 | -0.10 | -0.29                 |   |                       |   |   |
| RPneg_498.17874_10.605  | RP    | neg        | 10.605          | 498.1787   |            | 4    |             | 0.81491  | 0.92958                                 | -0.02 | 0.13   | 0.37  | 0.08  | -0.07                 | 0.24  | 0.58022               | 0.92416 | 0.04  | -0.17                      | -0.21 | -0.05 | 0.27  | 0.07  | 0.58                  |   |                       |   |   |
| RPneg_498.17926_10.521  | RP    | neg        | 10.521          | 498.1793   |            |      |             |          |                                         |       |        |       |       |                       |       |                       |         |       |                            |       |       |       |       |                       |   |                       |   |   |

| Feature_ID             | Mode  | Ionization | Average_Rt.min. | Average_Mz | Metabolite | MSMS        | ID_Level | HMDB_ID | IV-Alcohol self-administration (IV-ASA) |         |       |       |       |                       |       |       |         |         | IV-Alcohol clamp (IV-AC)   |       |       |       |       |                       |       |       |   |   |
|------------------------|-------|------------|-----------------|------------|------------|-------------|----------|---------|-----------------------------------------|---------|-------|-------|-------|-----------------------|-------|-------|---------|---------|----------------------------|-------|-------|-------|-------|-----------------------|-------|-------|---|---|
|                        |       |            |                 |            |            |             |          |         | Area Under the Curve (AUC)              |         |       |       |       | IV-Ghrelin or Placebo |       |       |         |         | Area Under the Curve (AUC) |       |       |       |       | IV-Ghrelin or Placebo |       |       |   |   |
|                        |       |            |                 |            |            |             |          |         | p                                       | q       | d     | d     | d     | d                     | d     | d     | d       | d       | p                          | q     | d     | d     | d     | p                     | q     | d     | d | d |
| RPpos_500.1509_7.48    | RP    | pos        | 7.48            | 500.1509   |            |             | 4        |         | 0.02715                                 | 0.28391 | 0.47  | -0.04 | 0.50  | 0.57                  | 0.91  | 0.68  | 0.00007 | 0.00902 | 0.34                       | 0.00  | -0.04 | 0.37  | 0.83  | 0.44                  | 0.44  | 0.14  |   |   |
| RPpos_500.2741_10.13   | RP    | pos        | 10.13           | 500.2741   |            |             | 4        |         | 0.48939                                 | 0.77067 | -0.18 | -0.16 | 0.22  | 0.26                  | -0.05 | -0.13 | 0.93285 | 0.98984 | -0.01                      | -0.20 | 0.06  | 0.10  | 0.16  | 0.01                  | 0.01  | -0.29 |   |   |
| HILICpos_500.2749_1.9  | HILIC | pos        | 1.9             | 500.2749   |            |             | 4        |         | 0.92580                                 | 0.97327 | -0.06 | -0.18 | 0.30  | 0.39                  | 0.27  | -0.18 | 0.86024 | 0.97966 | 0.02                       | -0.08 | 0.10  | 0.04  | 0.08  | 0.09                  | -0.36 |       |   |   |
| RPpos_500.2753_10.26   | RP    | pos        | 10.26           | 500.2753   |            |             | 4        |         | 0.77772                                 | 0.91256 | -0.10 | 0.14  | 0.56  | 0.60                  | -0.04 | -0.14 | 0.81805 | 0.97238 | -0.10                      | 0.06  | -0.21 | -0.31 | 0.02  | -0.04                 | -0.07 |       |   |   |
| RPneg_500.2769_10.252  | RP    | neg        | 10.252          | 500.2769   |            |             | 4        |         | 0.96674                                 | 0.98605 | 0.02  | 0.13  | 0.52  | 0.45                  | 0.72  | 0.14  | 0.83063 | 0.82049 | 0.54                       | 0.23  | 0.54  | 0.50  | 0.60  | 0.68                  | -0.16 |       |   |   |
| HILICpos_500.2770_1.84 | HILIC | pos        | 1.84            | 500.2770   |            |             | 4        |         | 0.76070                                 | 0.96000 | -0.05 | -0.13 | 0.21  | 0.07                  | 0.15  | 0.01  | 0.83933 | 0.97600 | 0.08                       | 0.10  | 0.17  | 0.21  | 0.36  | 0.05                  | -0.06 |       |   |   |
| HILICneg_500.2772_1.67 | HILIC | neg        | 1.67            | 500.2772   |            |             | 4        |         | 0.89826                                 | 0.96279 | -0.03 | 0.04  | 0.47  | 0.29                  | 0.58  | 0.08  | 0.24100 | 0.75800 | 0.58                       | -0.03 | 0.65  | 0.72  | 0.94  | 0.37                  | 0.00  |       |   |   |
| RPpos_500.2772_9.84    | RP    | pos        | 9.84            | 500.2772   |            |             | 4        |         | 0.92456                                 | 0.97276 | -0.01 | 0.04  | 0.22  | 0.04                  | 0.18  | -0.06 | 0.84093 | 0.97634 | 0.09                       | -0.04 | 0.16  | 0.15  | 0.30  | 0.20                  | -0.02 |       |   |   |
| HILICneg_500.2773_1.92 | HILIC | neg        | 1.92            | 500.2773   |            |             | 4        |         | 0.93631                                 | 0.97709 | 0.02  | 0.01  | 0.42  | 0.43                  | 0.75  | -0.01 | 0.32892 | 0.81992 | 0.49                       | 0.18  | 0.46  | 0.53  | 1.04  | 0.35                  | -0.15 |       |   |   |
| RPneg_500.27921_8.683  | RP    | neg        | 8.683           | 500.2792   |            |             | 4        |         | 0.03158                                 | 0.29799 | 0.35  | -0.11 | 0.88  | 0.35                  | 0.66  | 0.58  | 0.00000 | 0.00001 | 0.54                       | -0.23 | 0.70  | 1.23  | 0.50  | 0.67                  | -0.35 |       |   |   |
| RPpos_500.2852_7.13    | RP    | pos        | 7.13            | 500.2852   |            | no autoMSMS | 4        |         | 0.00005                                 | 0.01249 | 1.20  | 0.33  | 1.49  | 1.51                  | 1.33  | 0.24  | 0.00024 | 0.02248 | 1.33                       | 0.30  | 0.59  | 1.46  | 2.20  | 1.85                  | -0.07 |       |   |   |
| RPpos_500.2853_7.01    | RP    | pos        | 7.01            | 500.2853   |            |             | 4        |         | 0.00095                                 | 0.06231 | 0.69  | 0.69  | 0.60  | 0.78                  | 0.79  | 0.75  | 0.61728 | 0.93244 | -0.22                      | -0.33 | -0.30 | -0.06 | -0.19 | -0.10                 | -0.65 |       |   |   |
| RPneg_500.2966_13.187  | RP    | neg        | 13.187          | 500.2966   |            |             | 4        |         | 0.45976                                 | 0.75064 | -0.23 | 0.70  | -0.35 | -0.24                 | 0.29  | -0.14 | 0.10268 | 0.57725 | -0.34                      | 0.10  | -0.30 | -0.33 | -0.54 | -0.23                 | -0.31 |       |   |   |
| RPpos_500.3039_9.68    | RP    | pos        | 9.68            | 500.3039   |            |             | 4        |         | 0.00542                                 | 0.14510 | 0.85  | -0.03 | 3.37  | 0.96                  | 0.90  | 0.08  | 0.11520 | 0.59932 | 0.71                       | -0.10 | 0.97  | 1.13  | 0.57  | 1.00                  | -0.26 |       |   |   |
| RPpos_500.3043_9.42    | RP    | pos        | 9.42            | 500.3043   |            |             | 4        |         | 0.02049                                 | 0.25894 | 1.24  | 0.17  | 2.43  | 0.90                  | 1.77  | 0.53  | 0.06441 | 0.49252 | 1.10                       | -0.39 | 1.98  | 1.31  | 1.03  | 0.97                  | -0.59 |       |   |   |
| RPpos_500.3225_9.17    | RP    | pos        | 9.17            | 500.3225   |            |             | 4        |         | 0.67235                                 | 0.86367 | 0.08  | 0.11  | 0.11  | 0.13                  | 0.40  | -0.48 | 0.25927 | 0.77358 | 1.36                       | 1.55  | 1.65  | 1.43  | 1.24  | 1.44                  | 1.63  |       |   |   |
| HILICpos_500.3433_0.41 | HILIC | pos        | 0.41            | 500.3433   |            |             | 4        |         | 0.96778                                 | 0.98827 | 0.04  | 0.39  | 0.41  | 0.16                  | 0.09  | 0.05  | 0.85614 | 0.97868 | -0.10                      | -0.06 | 0.13  | -0.29 | -0.01 | -0.34                 | 0.69  |       |   |   |
| RPpos_500.4295_12.09   | RP    | pos        | 12.09           | 500.4295   |            |             | 4        |         | 0.19272                                 | 0.53805 | 0.49  | -0.05 | 0.94  | 1.48                  | 0.38  | -0.49 | 0.35255 | 0.83226 | 0.37                       | -0.12 | 0.26  | 0.80  | 0.49  | 0.43                  | 0.22  |       |   |   |
| HILICpos_501.0671_5.32 | HILIC | pos        | 5.32            | 501.0671   |            |             | 4        |         | 0.21272                                 | 0.55521 | 0.37  | 0.53  | 0.42  | 0.23                  | 0.45  | 0.38  | 0.21065 | 0.72715 | 0.12                       | -0.01 | -0.04 | 0.25  | 0.15  | 0.44                  | -0.69 |       |   |   |
| HILICneg_501.1439_0.58 | HILIC | neg        | 0.58            | 501.1439   |            |             | 4        |         | 0.02332                                 | 0.27043 | -0.58 | -0.38 | 0.04  | -0.29                 | -0.62 | -0.19 | 0.97627 | 0.99711 | -0.01                      | 0.12  | 0.01  | -0.60 | 0.21  | 0.14                  | -0.24 |       |   |   |
| HILICpos_501.2105_5.8  | HILIC | pos        | 5.8             | 501.2105   |            |             | 4        |         | 0.36750                                 | 0.68420 | 0.23  | 0.51  | 0.49  | 0.38                  | 0.19  | 0.10  | 0.21316 | 0.72988 | 0.49                       | 0.32  | 0.73  | 0.86  | 0.40  | -0.04                 | -0.15 |       |   |   |
| RPneg_501.28506_9.43   | RP    | neg        | 9.43            | 501.2851   |            |             | 4        |         | 0.00220                                 | 0.09516 | 1.67  | 0.27  | 2.90  | 1.07                  | 2.37  | 1.43  | 0.04223 | 0.41566 | 0.74                       | -0.51 | 1.20  | 1.62  | 0.42  | 0.63                  | -0.55 |       |   |   |
| RPneg_501.28973_8.827  | RP    | neg        | 8.827           | 501.2897   |            |             | 4        |         | 0.02952                                 | 0.29135 | 0.33  | 0.20  | 0.55  | 0.29                  | 0.18  | 1.48  | 0.08402 | 0.53900 | -0.29                      | -0.25 | -0.34 | -0.32 | -0.22 | 0.27                  | -0.27 |       |   |   |
| HILICpos_501.3414_0.37 | HILIC | pos        | 0.37            | 501.3414   |            |             | 4        |         | 0.80028                                 | 0.92270 | -0.02 | 0.33  | 0.29  | 0.00                  | 0.34  | -0.24 | 0.64125 | 0.93643 | -0.25                      | -0.11 | 0.33  | -0.51 | 0.04  | -0.54                 | 0.04  |       |   |   |
| RPpos_501.3432_10.71   | RP    | pos        | 10.71           | 501.3432   |            |             | 4        |         | 0.85413                                 | 0.94532 | 0.07  | 0.16  | 0.37  | 0.50                  | -0.08 | -0.26 | 0.77122 | 0.96458 | 0.05                       | -0.16 | 0.34  | 0.24  | -0.86 | -0.30                 | 0.45  |       |   |   |
| RPneg_501.39413_11.661 | RP    | neg        | 11.661          | 501.3941   |            |             | 4        |         | 0.31020                                 | 0.63855 | 0.11  | 0.08  | 0.04  | 0.11                  | 0.55  | 0.22  | 0.52019 | 0.90883 | -0.14                      | -0.17 | 0.17  | -0.21 | -0.06 | -0.23                 | -0.39 |       |   |   |
| RPneg_501.39413_11.496 | RP    | neg        | 11.496          | 501.3941   |            |             | 4        |         | 0.01315                                 | 0.21729 | 0.30  | 0.04  | 0.33  | 0.39                  | 0.67  | 0.33  | 0.69171 | 0.95008 | -0.08                      | 0.51  | -0.05 | -0.02 | 0.06  | -0.05                 | 0.96  |       |   |   |
| HILICneg_501.3961_0.39 | HILIC | neg        | 0.39            | 501.3961   |            |             | 4        |         | 0.04434                                 | 0.33889 | 0.67  | 0.50  | 0.30  | 0.74                  | 1.58  | 0.36  | 0.77548 | 0.96491 | -0.01                      | 0.32  | 0.00  | -0.04 | -0.01 | 0.02                  | -0.10 |       |   |   |
| RPpos_501.3961_13.58   | RP    | pos        | 13.58           | 501.3961   |            |             | 4        |         | 0.96066                                 | 0.98066 | -0.03 | 0.38  | -0.12 | 0.88                  | -0.58 | 0.31  | 0.10277 | 0.57743 | -0.45                      | -0.44 | -0.47 | 0.19  | -0.43 | -0.19                 | -0.26 |       |   |   |
| RPneg_501.39636_11.574 | RP    | neg        | 11.574          | 501.3964   |            |             | 4        |         | 0.04735                                 | 0.34075 | 0.35  | 0.18  | 0.43  | 0.41                  | 0.63  | 0.90  | 0.15768 | 0.66557 | -0.29                      | -0.12 | -0.31 | -0.16 | -0.23 | -0.02                 | -0.42 |       |   |   |
| HILICneg_501.9626_5.41 | HILIC | neg        | 5.41            | 501.9626   |            |             | 4        |         | 0.70484                                 | 0.87943 | 0.11  | 0.24  | 0.40  | 0.02                  | 0.43  | 0.73  | 0.70688 | 0.50865 | 0.06                       | -0.13 | 0.12  | 0.06  | 0.04  | 0.28                  | -0.51 |       |   |   |
| RPpos_502.0323_3.73    | RP    | pos        | 3.73            | 502.0323   |            |             | 4        |         | 0.08984                                 | 0.41828 | 0.36  | 0.37  | 0.46  | 0.23                  | 0.33  | 1.47  | 0.38053 | 0.84721 | -0.38                      | -0.13 | -0.40 | -0.43 | -0.46 | -0.37                 | -0.19 |       |   |   |
| RPneg_502.27097_9.881  | RP    | neg        | 9.881           | 502.2709   |            |             | 4        |         | 0.14790                                 | 0.48958 | -0.33 | -0.04 | 0.00  | -0.28                 | -0.19 | -0.15 | 0.39001 | 0.79495 | -0.32                      | -0.02 | -0.38 | -0.55 | -0.29 | -0.19                 | -0.38 |       |   |   |
| RPneg_502.27107_9.721  | RP    | neg        | 9.721           | 502.2710   |            |             | 4        |         | 0.11727                                 | 0.45287 | -0.38 | -0.02 | 0.00  | -0.34                 | -0.34 | -0.22 | 0.20357 | 0.71972 | -0.44                      | -0.46 | -0.35 | -0.68 | -0.30 | -0.59                 | -0.79 |       |   |   |
| HILICneg_502.2711_1.42 | HILIC | neg        | 1.42            | 502.2710   |            |             | 4        |         | 0.25054                                 | 0.58966 | -0.33 | 0.03  | -0.12 | -0.27                 | 0.00  | -0.18 | 0.19823 | 0.71412 | -0.33                      | -0.31 | -0.52 | -0.48 | -0.43 | -0.26                 | 0.36  |       |   |   |
| RPpos_502.2905_10.55   | RP    | pos        | 10.55           | 502.2905   |            |             | 4        |         | 0.47148                                 | 0.75846 | -0.25 | -0.28 | 0.09  | 0.16                  | 0.08  | -0.31 | 0.95106 | 0.99346 | 0.02                       | -0.17 | -0.08 | 0.14  | 0.29  | 0.07                  | -0.30 |       |   |   |
| RPpos_502.2917_10.24   | RP    | pos        | 10.24           | 502.2917   |            |             | 4        |         | 0.78829                                 | 0.91707 | 0.09  | 0.11  | 0.54  | 0.63                  | 0.76  | 0.33  | 0.49626 | 0.90020 | 0.34                       | 0.03  | 0.23  | 0.49  | 0.92  | 0.33                  | 0.09  |       |   |   |
| HILICpos_502.2924_1.56 | HILIC | pos        | 1.56            | 502.2924   |            |             | 4        |         | 0.89593                                 | 0.96217 | -0.03 | -0.07 | 0.50  | 0.52                  | 0.50  | -0.05 | 0.21834 | 0.73509 | 0.57                       | 0.09  | 0.68  | 0.59  | 1.08  | 0.33                  | -0.13 |       |   |   |
| HILICpos_502.2926_1.78 | HILIC | pos        | 1.78            | 502.2926   |            |             | 4        |         | 0.91923                                 | 0.97052 | -0.03 | 0.00  | 0.49  | 0.37                  | 0.61  | -0.12 | 0.30609 | 0.80614 | 0.52                       | -0.28 | 0.57  | 0.49  | 1.09  | 0.35                  | -0.15 |       |   |   |
| HILICneg_502.2943_1.95 | HILIC | neg        | 1.95            | 502.2943   |            |             | 4        |         | 0.26877                                 | 0.60483 | -0.30 | -0.30 | -0.06 | -0.08                 | -0.04 | -0.08 | 0.93550 | 0.99000 | 0.02                       | -0.23 | -0.05 | 0.12  | 0.33  | 0.28                  | -0.30 |       |   |   |
| RPneg_502.29471_10.535 | RP    | neg        | 10.535          | 502.2947   |            |             | 4        |         | 0.64374                                 | 0.84910 | 0.18  | -0.03 | 1.68  | 0.03                  | 0.09  | -0.13 | 0.29552 | 0.79880 | -0.18                      | -0.28 | -0.22 | -0.09 | 0.01  | -0.13                 | -0.35 |       |   |   |
| RPneg_502.29474_10.34  | RP    | neg        | 10.34           | 502.2947   |            |             | 4        |         | 0.14900                                 | 0.49149 | -0.38 | -0.15 | -0.06 | -0.19                 | -0.06 | -0.28 | 0.90926 | 0.98698 | 0.05                       | -0.21 | 0.08  | 0.17  | 0.44  | 0.10                  | -0.31 |       |   |   |
| RPpos_502.3265_10.63   | RP    | pos        | 10.63           | 502.3265   |            |             | 4        |         | 0.05805                                 | 0.36250 | -0.32 | -0.08 | -0.17 | -0.20                 | 0.13  | -0.41 | 0.56763 | 0.92089 | 0.12                       | 0.34  | 0.24  | 0.08  | 0.24  | -0.01                 | -0.10 |       |   |   |
| HILICpos_502.3566_0.45 | HILIC | pos        | 0.45            | 502.3566   |            |             | 4        |         | 0.23052                                 | 0.57207 | -0.24 | 0.07  | 0.43  | -0.06                 | -0.10 | -0.28 | 0.75034 | 0.96176 |                            |       |       |       |       |                       |       |       |   |   |



| Feature_ID              | Mode  | Ionization | Average.Rt.min. | Average.Mz | Metabolite | MSMS | ID_Level | HMDB_ID | IV-Alcohol self-administration (IV-ASA) |         |       |          |       |       |                       |       |         |         | IV-Alcohol clamp (IV-AC) |       |       |                            |       |       |          |   |   |         |   |   |                       |   |   |  |        |  |  |
|-------------------------|-------|------------|-----------------|------------|------------|------|----------|---------|-----------------------------------------|---------|-------|----------|-------|-------|-----------------------|-------|---------|---------|--------------------------|-------|-------|----------------------------|-------|-------|----------|---|---|---------|---|---|-----------------------|---|---|--|--------|--|--|
|                         |       |            |                 |            |            |      |          |         | Area Under the Curve (AUC)              |         |       | Baseline |       |       | IV-Ghrelin or Placebo |       |         |         | BrAc=0                   |       |       | Area Under the Curve (AUC) |       |       | Baseline |   |   | Post-LD |   |   | IV-Ghrelin or Placebo |   |   |  | BrAc=0 |  |  |
|                         |       |            |                 |            |            |      |          |         | p                                       | q       | d     | d        | d     | d     | d                     | d     | d       | d       | p                        | q     | d     | d                          | d     | d     | d        | d | d | d       | d | d | d                     | d | d |  |        |  |  |
| RPneg_509.27606_8.678   | RP    | neg        | 8.678           |            |            |      | 4        |         | 0.22144                                 | 0.56379 | 0.18  | -0.04    | 0.43  | 0.28  | 0.30                  | -0.07 | 0.05425 | 0.46152 | 0.21                     | -0.08 | 0.12  | 0.32                       | 0.39  | 0.24  | 0.01     |   |   |         |   |   |                       |   |   |  |        |  |  |
| RPpos_509.3291_7.63     | RP    | pos        | 7.63            | 509.3291   |            |      | 4        |         | 0.65118                                 | 0.85288 | -0.12 | -0.19    | 0.58  | 0.05  | -0.47                 | 0.65  | 0.89729 | 0.98504 | -0.03                    | 0.02  | 0.12  | 0.09                       | -0.04 | -0.38 | -0.14    |   |   |         |   |   |                       |   |   |  |        |  |  |
| HILICneg_509.3294_0.39  | HILIC | neg        | 0.39            | 509.3294   |            |      | 4        |         | 0.19718                                 | 0.54192 | 0.26  | 0.12     | 0.17  | 0.23  | 1.15                  | -0.34 | 0.44334 | 0.87946 | 0.20                     | 0.25  | 0.31  | 0.35                       | 0.17  | 0.10  | 0.09     |   |   |         |   |   |                       |   |   |  |        |  |  |
| RPpos_509.3309_7.33     | RP    | pos        | 7.33            | 509.3309   |            |      | 4        |         | 0.58141                                 | 0.81909 | 0.12  | 0.43     | 0.58  | 0.46  | 0.04                  | 0.76  | 0.82863 | 0.97434 | 0.02                     | 0.05  | 0.25  | 0.07                       | 0.09  | -0.59 | -0.32    |   |   |         |   |   |                       |   |   |  |        |  |  |
| HILICpos_509.3351_4.53  | HILIC | pos        | 4.53            | 509.3351   |            |      | 4        |         | 0.06953                                 | 0.89857 | -0.25 | 0.33     | 0.17  | 0.08  | 0.25                  | 0.13  | 0.56233 | 0.92016 | 0.02                     | -0.15 | 0.07  | -0.04                      | 0.08  | -0.06 | 0.03     |   |   |         |   |   |                       |   |   |  |        |  |  |
| RPpos_509.3953_9.17     | RP    | pos        | 9.17            | 509.3953   |            |      | 4        |         | 0.00785                                 | 0.17418 | 0.01  | 0.02     | -0.09 | 1.09  | 1.61                  | -1.34 | 0.00085 | 0.05173 | 0.31                     | -0.24 | 0.46  | 0.85                       | 0.18  | 0.20  | -0.42    |   |   |         |   |   |                       |   |   |  |        |  |  |
| RPpos_509.6992_11.19    | RP    | pos        | 11.19           | 509.6992   |            |      | 4        |         | 0.00132                                 | 0.07391 | -0.93 | -0.04    | -0.41 | -0.42 | -1.74                 | -0.13 | 0.59246 | 0.92667 | 0.18                     | 0.02  | 1.15  | 0.55                       | -0.02 | -0.28 | -0.27    |   |   |         |   |   |                       |   |   |  |        |  |  |
| RPneg_510.10013_10.926  | RP    | neg        | 10.926          | 510.1001   |            |      | 4        |         | 0.00254                                 | 0.10344 | 0.94  | -0.14    | 0.65  | 0.67  | 1.68                  | 0.04  | 0.69195 | 0.95008 | 0.04                     | 0.03  | 0.27  | 0.03                       | -0.15 | -0.02 | -0.12    |   |   |         |   |   |                       |   |   |  |        |  |  |
| RPneg_510.12286_11.19   | RP    | neg        | 11.19           | 510.1229   |            |      | 4        |         | 0.49252                                 | 0.77266 | 0.23  | 0.35     | 0.53  | 0.68  | 0.11                  | -0.10 | 0.96917 | 0.99673 | -0.04                    | 0.31  | 0.15  | 0.07                       | -0.40 | -0.12 | 0.03     |   |   |         |   |   |                       |   |   |  |        |  |  |
| RPneg_510.25183_8.813   | RP    | neg        | 8.813           | 510.2518   |            |      | 4        |         | 0.00003                                 | 0.00892 | 0.33  | 0.12     | 0.60  | 0.43  | 0.56                  | -0.03 | 0.42895 | 0.87314 | 0.18                     | 0.03  | 0.11  | 0.17                       | 0.39  | 0.27  | -0.12    |   |   |         |   |   |                       |   |   |  |        |  |  |
| RPneg_510.25211_8.983   | RP    | neg        | 8.983           | 510.2521   |            |      | 4        |         | 0.29888                                 | 0.62868 | 0.21  | -0.06    | 0.28  | 0.32  | 0.41                  | 0.05  | 0.70053 | 0.95161 | 0.06                     | -0.11 | -0.07 | 0.49                       | -0.11 | 0.22  | -0.15    |   |   |         |   |   |                       |   |   |  |        |  |  |
| RPneg_510.25226_8.424   | RP    | neg        | 8.424           | 510.2523   |            |      | 4        |         | 0.07361                                 | 0.39176 | 0.26  | 0.22     | 0.37  | 0.33  | 0.43                  | 0.40  | 0.38719 | 0.85056 | -0.20                    | -0.35 | -0.20 | -0.16                      | -0.08 | -0.08 | -0.39    |   |   |         |   |   |                       |   |   |  |        |  |  |
| HILICneg_510.2534_1.23  | HILIC | neg        | 1.23            | 510.2534   |            |      | 4        |         | 0.07641                                 | 0.39714 | 0.27  | 0.21     | 0.35  | 0.33  | 0.42                  | 0.45  | 0.28851 | 0.79418 | -0.23                    | -0.31 | -0.22 | 0.21                       | -0.12 | -0.14 | -0.42    |   |   |         |   |   |                       |   |   |  |        |  |  |
| RPpos_510.2636_9.83     | RP    | pos        | 9.83            | 510.2636   |            |      | 4        |         | 0.05413                                 | 0.35501 | 0.38  | 0.60     | 0.55  | 0.27  | 0.53                  | 0.15  | 0.11326 | 0.59660 | 0.69                     | -0.12 | 0.46  | 0.79                       | 1.11  | 1.12  | 1.18     |   |   |         |   |   |                       |   |   |  |        |  |  |
| RPneg_510.28259_9.421   | RP    | neg        | 9.421           | 510.2826   |            |      | 4        |         | 0.55836                                 | 0.80857 | -0.10 | 0.03     | 0.09  | -0.02 | 0.06                  | -0.13 | 0.99297 | 0.99904 | 0.04                     | 0.05  | 0.04  | -0.01                      | 0.09  | 0.24  | 0.09     |   |   |         |   |   |                       |   |   |  |        |  |  |
| RPneg_510.3204_10.413   | RP    | neg        | 10.413          | 510.3204   |            |      | 4        |         | 0.47594                                 | 0.76163 | -0.25 | -0.02    | 0.04  | -0.19 | -0.04                 | -0.12 | 0.35795 | 0.83442 | -0.18                    | -0.26 | -0.01 | -0.10                      | -0.16 | 0.10  | -0.42    |   |   |         |   |   |                       |   |   |  |        |  |  |
| HILICpos_510.3545_1.1   | HILIC | pos        | 1.1             | 510.3545   |            |      | 4        |         | 0.00717                                 | 0.16739 | -0.55 | 0.08     | -0.18 | -0.44 | -0.66                 | -0.39 | 0.28391 | 0.79235 | -0.07                    | 0.42  | -0.05 | 0.02                       | -0.06 | -0.07 | -0.22    |   |   |         |   |   |                       |   |   |  |        |  |  |
| HILICpos_510.3546_1.22  | HILIC | pos        | 1.22            | 510.3546   |            |      | 4        |         | 0.01064                                 | 0.20155 | -0.70 | -0.06    | -0.25 | -0.43 | -0.91                 | 0.08  | 0.44431 | 0.87996 | -0.17                    | -0.59 | -0.44 | -0.16                      | 0.06  | 0.13  | -0.11    |   |   |         |   |   |                       |   |   |  |        |  |  |
| HILICpos_510.3564_10.66 | RP    | pos        | 10.66           | 510.3564   |            |      | 4        |         | 0.03628                                 | 0.31114 | -0.50 | -0.11    | -0.19 | -0.52 | -0.29                 | -0.36 | 0.48743 | 0.90072 | -0.01                    | 0.12  | 0.04  | -0.02                      | 0.04  | 0.18  | -0.14    |   |   |         |   |   |                       |   |   |  |        |  |  |
| RPpos_510.3564_10.6     | RP    | pos        | 10.6            | 510.3564   |            |      | 4        |         | 0.06036                                 | 0.36698 | -0.41 | 0.01     | -0.17 | -0.44 | -0.30                 | -0.21 | 0.14650 | 0.65036 | -0.28                    | -0.14 | 0.21  | -0.26                      | -0.11 | -0.29 | -0.32    |   |   |         |   |   |                       |   |   |  |        |  |  |
| RPpos_510.3566_10.54    | RP    | pos        | 10.54           | 510.3566   |            |      | 4        |         | 0.04343                                 | 0.33133 | -0.49 | -0.17    | -0.37 | -0.41 | -0.16                 | -0.28 | 0.44540 | 0.88012 | -0.08                    | 0.01  | -0.20 | 0.10                       | 0.05  | -0.05 | -0.05    |   |   |         |   |   |                       |   |   |  |        |  |  |
| RPpos_510.3568_10.47    | RP    | pos        | 10.47           | 510.3568   |            |      | 4        |         | 0.07002                                 | 0.38445 | -0.43 | -0.10    | -0.14 | -0.47 | -0.31                 | -0.18 | 0.19317 | 0.70820 | -0.30                    | -0.34 | -0.24 | -0.13                      | -0.32 | -0.28 | -0.22    |   |   |         |   |   |                       |   |   |  |        |  |  |
| RPpos_510.3921_11.13    | RP    | pos        | 11.13           | 510.3921   |            |      | 4        |         | 0.10794                                 | 0.44131 | -0.36 | 0.03     | -0.16 | -0.34 | -0.08                 | -0.40 | 0.36937 | 0.84019 | -0.08                    | -0.06 | -0.03 | -0.02                      | 0.00  | -0.08 | -0.22    |   |   |         |   |   |                       |   |   |  |        |  |  |
| HILICpos_510.4496_0.57  | HILIC | pos        | 0.57            | 510.4496   |            |      | 4        |         | 0.12550                                 | 0.46128 | -0.22 | 0.25     | -0.18 | -0.33 | 0.05                  | -0.47 | 0.04969 | 0.44406 | 0.40                     | 0.68  | 0.64  | 0.10                       | 0.68  | 0.23  | -0.03    |   |   |         |   |   |                       |   |   |  |        |  |  |
| RPpos_510.4511_10.36    | RP    | pos        | 10.36           | 510.4511   |            |      | 4        |         | 0.34412                                 | 0.66563 | -0.14 | 0.67     | 0.26  | -0.35 | 0.07                  | -0.83 | 0.14261 | 0.64525 | 0.34                     | 0.35  | 0.46  | 0.07                       | 0.60  | 0.28  | -0.04    |   |   |         |   |   |                       |   |   |  |        |  |  |
| RPpos_510.4884_12.4     | RP    | pos        | 12.4            | 510.4884   |            |      | 4        |         | 0.50065                                 | 0.77659 | -0.16 | 0.53     | -0.30 | -0.30 | 0.21                  | -0.17 | 0.00857 | 0.19794 | -0.33                    | -0.21 | -0.35 | -0.42                      | -0.28 | -0.24 | -0.41    |   |   |         |   |   |                       |   |   |  |        |  |  |
| RPpos_510.7591_4.6      | RP    | pos        | 4.6             | 510.7591   |            |      | 4        |         | 0.28852                                 | 0.62199 | -0.15 | -0.01    | -0.10 | -0.41 | 0.01                  | 0.58  | 0.30425 | 0.80438 | 0.34                     | 0.22  | 0.15  | 0.19                       | 0.20  | 0.66  | 0.67     |   |   |         |   |   |                       |   |   |  |        |  |  |
| RPpos_510.7591_4.42     | RP    | pos        | 4.42            | 510.7591   |            |      | 4        |         | 0.31877                                 | 0.64531 | -0.13 | 0.02     | -0.09 | -0.43 | 0.08                  | 0.59  | 0.28918 | 0.79431 | 0.35                     | 0.13  | 0.15  | 0.27                       | 0.16  | 0.79  | 0.58     |   |   |         |   |   |                       |   |   |  |        |  |  |
| RPneg_511.09543_7.705   | RP    | neg        | 7.705           | 511.0954   |            |      | 4        |         | 0.25486                                 | 0.59326 | -0.37 | 0.03     | 0.16  | 0.04  | 0.19                  | -0.46 | 0.63096 | 0.93546 | -0.06                    | 0.54  | -0.27 | -0.13                      | -0.22 | 0.36  | -0.10    |   |   |         |   |   |                       |   |   |  |        |  |  |
| HILICpos_511.1537_7.08  | HILIC | pos        | 7.08            | 511.1537   |            |      | 4        |         | 0.34671                                 | 0.66762 | -0.13 | 0.31     | 0.43  | -0.15 | -0.18                 | -0.37 | 0.02669 | 0.34401 | 0.55                     | 0.90  | 0.92  | 0.97                       | 0.57  | -0.16 | -0.43    |   |   |         |   |   |                       |   |   |  |        |  |  |
| HILICneg_511.1705_0.57  | HILIC | neg        | 0.57            | 511.1705   |            |      | 4        |         | 0.05600                                 | 0.35850 | -0.42 | -0.19    | 0.01  | -0.27 | -0.38                 | 0.03  | 0.25228 | 0.76798 | 0.47                     | 0.16  | 0.31  | -0.36                      | 0.58  | 0.47  | -0.03    |   |   |         |   |   |                       |   |   |  |        |  |  |
| RPneg_511.21701_7.645   | RP    | neg        | 7.645           | 511.2170   |            |      | 4        |         | 0.00495                                 | 0.33540 | 0.53  | -0.14    | 0.38  | 0.09  | 0.08                  | 0.53  | 0.12084 | 0.60831 | -0.19                    | 0.16  | -0.32 | -0.46                      | -0.45 | 0.92  | 0.09     |   |   |         |   |   |                       |   |   |  |        |  |  |
| HILICpos_511.2313_6.16  | HILIC | pos        | 6.16            | 511.2313   |            |      | 4        |         | 0.79468                                 | 0.91017 | -0.11 | 0.24     | 0.23  | -0.21 | 0.33                  | -0.11 | 0.88716 | 0.98347 | 0.00                     | 0.32  | 0.59  | -0.39                      | 0.94  | 0.39  | 0.14     |   |   |         |   |   |                       |   |   |  |        |  |  |
| RPpos_511.2731_10.84    | RP    | pos        | 10.84           | 511.2731   |            |      | 4        |         | 0.87952                                 | 0.95506 | 0.04  | -0.34    | 1.18  | 0.33  | 0.05                  | 0.48  | 0.14291 | 0.64534 | -0.43                    | -0.03 | -0.44 | 0.43                       | -0.08 | -0.37 | -0.71    |   |   |         |   |   |                       |   |   |  |        |  |  |
| RPneg_511.27405_9.811   | RP    | neg        | 9.811           | 511.2741   |            |      | 4        |         | 0.98599                                 | 0.99480 | 0.03  | 0.23     | 0.28  | -0.21 | 0.09                  | 0.18  | 0.13179 | 0.62676 | -0.44                    | -0.27 | -0.56 | -0.43                      | -0.38 | -0.49 | -0.33    |   |   |         |   |   |                       |   |   |  |        |  |  |
| RPneg_511.28995_8.717   | RP    | neg        | 8.717           | 511.2900   |            |      | 4        |         | 0.00143                                 | 0.07654 | 0.43  | 0.39     | 0.66  | 0.50  | 0.63                  | 0.48  | 0.77192 | 0.96458 | -0.04                    | -0.16 | -0.09 | -0.08                      | 0.04  | 0.04  | -0.07    |   |   |         |   |   |                       |   |   |  |        |  |  |
| RPneg_511.29044_7.29    | RP    | neg        | 7.29            | 511.2904   |            |      | 4        |         | 0.00552                                 | 0.14603 | 0.38  | 0.51     | 0.55  | 0.44  | 0.44                  | 0.59  | 0.27518 | 0.78563 | -0.26                    | -0.31 | -0.25 | -0.30                      | -0.21 | -0.26 | -0.21    |   |   |         |   |   |                       |   |   |  |        |  |  |
| HILICneg_511.3007_1.06  | HILIC | neg        | 1.06            | 511.3007   |            |      | 4        |         | 0.00339                                 | 0.11973 | 0.67  | 0.05     | 0.87  | 0.85  | 1.38                  | 1.67  | 0.03209 | 0.37052 | 0.25                     | -0.33 | 0.36  | 0.74                       | 0.26  | 0.24  | -0.60    |   |   |         |   |   |                       |   |   |  |        |  |  |
| HILICpos_511.301_0.45   | HILIC | pos        | 0.45            | 511.3010   |            |      | 4        |         | 0.84285                                 | 0.94107 | 0.07  | -0.30    | 0.37  | 0.47  | 0.00                  | 0.47  | 0.50807 | 0.90389 | -0.14                    | 0.00  | -0.05 | -0.25                      | -0.18 | -0.28 | -0.14    |   |   |         |   |   |                       |   |   |  |        |  |  |
| RPpos_511.3015_9.21     | RP    | pos        | 9.21            | 511.3015   |            |      | 4        |         | 0.75704                                 | 0.90395 | 0.01  | 0.13     | 0.37  | 0.09  | -0.07                 | 0.59  | 0.70417 | 0.95228 | -0.15                    | -0.25 | 0.16  | -0.25                      | -0.06 | -0.48 | -0.08    |   |   |         |   |   |                       |   |   |  |        |  |  |
| RPneg_511.30176_9.323   | RP    | neg        | 9.323           | 511.3018   |            |      | 4        |         | 0.00021                                 | 0.02753 | 0.50  | 0.10     | 0.55  | 0.51  | 1.03                  | 1.30  | 0.29348 | 0.79704 | 0.55                     | -0.26 | 0.68  | 0.94                       | 0.47  | 0.81  | -0.19    |   |   |         |   |   |                       |   |   |  |        |  |  |
| RPneg_511.30347_9.174   | RP    | neg        | 9.174           | 511.3035   |            |      | 4        |         | 0.00193                                 | 0.08849 | 0.87  | 0.14     | 1.20  | 1.10  | 1.27                  | 1.53  | 0.00000 | 0.00123 | 0.45                     | -0.27 | 0.61  | 1.07                       | 0.37  | 0.41  | -0.48    |   |   |         |   |   |                       |   |   |  |        |  |  |
| HILICpos_511.3265_0.64  | HILIC | pos        | 0.64            | 511.3265   |            |      | 4        |         | 0.19302                                 | 0.53836 | -0.40 | -0.20    | 0.73  | -0.30 | -0.40                 | 0.53  | 0.08829 | 0.54840 | -0.16                    | -0.11 | 0.03  | -0.42                      | -0.12 | 0.11  | -0.13    |   |   |         |   |   |                       |   |   |  |        |  |  |
| HILICpos_511.3272_0.69  | HILIC | pos        | 0.69            | 511.3272   |            |      | 4        |         | 0.50920                                 | 0.78201 | -0.21 | 0.03     | -0.17 | -0.34 | 1.61                  | 0.05  | 0.12027 | 0.60736 |                          |       |       |                            |       |       |          |   |   |         |   |   |                       |   |   |  |        |  |  |



|                        |       |            |                 |            |            |             | IV-Alcohol self-administration (IV-ASA) |         |                                         |         |       |       |       |       |          |       |   |                       |         | IV-Alcohol clamp (IV-AC) |       |                          |       |       |                            |       |      |          |   |         |   |                       |   |   |       |   |   |
|------------------------|-------|------------|-----------------|------------|------------|-------------|-----------------------------------------|---------|-----------------------------------------|---------|-------|-------|-------|-------|----------|-------|---|-----------------------|---------|--------------------------|-------|--------------------------|-------|-------|----------------------------|-------|------|----------|---|---------|---|-----------------------|---|---|-------|---|---|
| Feature_ID             | Mode  | Ionization | Average_Rt.min. | Average_Mz | Metabolite | MSMS        | ID_Level                                | HMDB_ID | IV-Alcohol self-administration (IV-ASA) |         |       |       |       |       |          |       |   |                       |         |                          |       | IV-Alcohol clamp (IV-AC) |       |       |                            |       |      |          |   |         |   |                       |   |   |       |   |   |
|                        |       |            |                 |            |            |             |                                         |         | Area Under the Curve (AUC)              |         |       |       |       |       | Baseline |       |   | IV-Ghrelin or Placebo |         |                          |       | BrC=0                    |       |       | Area Under the Curve (AUC) |       |      | Baseline |   | Post-LD |   | IV-Ghrelin or Placebo |   |   | BrC=0 |   |   |
|                        |       |            |                 |            |            |             |                                         |         | p                                       | q       | d     | d     | d     | d     | d        | d     | d | d                     | d       | d                        | d     | d                        | d     | d     | d                          | d     | d    | d        | d | d       | d | d                     | d | d | d     | d | d |
| RPpos_513.3871_11.27   | RP    | pos        | 11.27           |            | 513.3871   |             | 4                                       |         | 0.14414                                 | 0.48467 | -0.45 | 0.39  | -0.11 | -0.03 | 0.19     | -0.31 |   | 0.07281               | 0.51430 | 0.59                     | 0.45  | 0.27                     | 0.55  | 0.43  | 0.75                       | 0.92  |      |          |   |         |   |                       |   |   |       |   |   |
| RPpos_513.3978_14.48   | RP    | pos        | 14.48           |            | 513.3978   |             | 4                                       |         | 0.97503                                 | 0.99033 | -0.09 | 0.36  | -0.39 | 0.80  | -0.02    | 0.25  |   | 0.01691               | 0.27821 | -0.44                    | -0.41 | 0.32                     | -0.63 | -0.25 | -0.45                      | -0.27 |      |          |   |         |   |                       |   |   |       |   |   |
| HILICpos_514.1079_6.13 | HILIC | pos        | 6.13            |            | 514.1079   |             | 4                                       |         | 0.76054                                 | 0.90500 | -0.13 | 0.12  | 0.45  | 0.11  | 0.00     | -0.13 |   | 0.16661               | 0.67785 | 0.14                     | -0.18 | 0.16                     | 0.08  | 0.48  | 0.16                       | -0.16 |      |          |   |         |   |                       |   |   |       |   |   |
| RPneg_514.16437_10.85  | RP    | neg        | 10.85           |            | 514.1644   |             | 4                                       |         | 0.13813                                 | 0.47769 | 0.34  | -0.05 | 0.17  | -0.08 | 0.40     | 0.03  |   | 0.95285               | 0.99379 | 0.01                     | -0.04 | 0.26                     | 0.11  | -0.13 | -0.09                      | -0.09 |      |          |   |         |   |                       |   |   |       |   |   |
| HILICpos_514.1725_4.84 | HILIC | pos        | 4.84            |            | 514.1725   |             | 4                                       |         | 0.43971                                 | 0.73678 | 0.20  | 0.09  | 1.03  | 0.28  | 0.18     | -0.28 |   | 0.92562               | 0.33747 | 0.99                     | 0.74  | 0.26                     | 1.37  | 1.37  | 0.67                       | 0.37  |      |          |   |         |   |                       |   |   |       |   |   |
| RPpos_514.2655_10.5    | RP    | pos        | 10.5            |            | 514.2655   |             | 4                                       |         | 0.28136                                 | 0.61975 | 0.13  | 0.01  | 0.87  | 0.20  | 0.39     | 0.18  |   | 0.17493               | 0.63999 | 0.35                     | 0.04  | -0.26                    | 0.07  | -0.20 | -0.30                      | -0.02 |      |          |   |         |   |                       |   |   |       |   |   |
| RPneg_514.27655_13.185 | RP    | neg        | 13.185          |            | 514.2766   |             | 4                                       |         | 0.32070                                 | 0.64717 | -0.29 | 1.11  | -0.41 | -0.39 | 0.17     | -0.04 |   | 0.67302               | 0.94628 | -0.13                    | -0.15 | 0.09                     | 0.05  | -0.11 | 0.00                       | -0.47 |      |          |   |         |   |                       |   |   |       |   |   |
| RPneg_514.27783_8.539  | RP    | neg        | 8.539           |            | 514.2778   |             | 4                                       |         | 0.00033                                 | 0.03398 | 0.91  | 0.51  | 1.53  | 0.84  | 0.38     | 2.07  |   | 0.10277               | 0.57743 | 0.72                     | 0.11  | 0.27                     | 0.83  | 1.16  | 0.76                       | 0.57  | 0.02 |          |   |         |   |                       |   |   |       |   |   |
| RPneg_514.28271_7.377  | RP    | neg        | 7.377           |            | 514.2827   |             | 4                                       |         | 0.00091                                 | 0.06059 | 1.01  | 0.12  | 1.38  | 1.41  | 1.17     | 0.68  |   | 0.21964               | 0.73629 | 0.27                     | -0.39 | 0.44                     | 0.73  | 0.36  | 0.25                       | -0.51 |      |          |   |         |   |                       |   |   |       |   |   |
| HILICneg_514.2833_3.2  | HILIC | neg        | 3.2             |            | 514.2833   |             | 4                                       |         | 0.07904                                 | 0.42023 | 0.71  | -0.05 | 1.86  | 0.68  | 0.41     | 0.46  |   | 0.02914               | 0.35585 | 0.91                     | -0.42 | 1.21                     | 2.05  | 0.79  | 0.59                       | -0.38 |      |          |   |         |   |                       |   |   |       |   |   |
| RPneg_514.28333_7.499  | RP    | neg        | 7.499           |            | 514.2833   |             | 4                                       |         | 0.00110                                 | 0.06696 | 0.53  | 0.14  | 0.95  | 0.47  | 0.49     | 0.29  |   | 0.46441               | 0.88716 | 0.63                     | -0.01 | 0.68                     | 0.76  | 0.90  | 0.75                       | -0.14 |      |          |   |         |   |                       |   |   |       |   |   |
| RPneg_514.28369_7.061  | RP    | neg        | 7.061           |            | 514.2837   |             | 4                                       |         | 0.00129                                 | 0.07287 | 0.59  | 0.08  | 0.96  | 0.50  | 0.84     | 0.28  |   | 0.94999               | 0.99346 | -0.03                    | -0.41 | -0.02                    | 0.29  | 0.14  | 0.01                       | -0.52 |      |          |   |         |   |                       |   |   |       |   |   |
| HILICpos_514.2847_0.44 | HILIC | pos        | 0.44            |            | 514.2847   |             | 4                                       |         | 0.76825                                 | 0.90882 | -0.05 | 0.00  | 0.62  | -0.05 | 0.40     | -0.01 |   | 0.02111               | 0.30723 | 0.37                     | 0.59  | 0.44                     | 0.07  | 0.72  | 0.14                       | -0.24 |      |          |   |         |   |                       |   |   |       |   |   |
| RPneg_514.28528_8.069  | RP    | neg        | 8.069           |            | 514.2853   |             | 4                                       |         | 0.01541                                 | 0.23287 | 0.84  | 0.11  | 1.15  | 1.34  | 0.81     | 0.97  |   | 0.40017               | 0.85821 | 0.16                     | -0.42 | 0.59                     | 0.68  | 0.06  | -0.06                      | -0.48 |      |          |   |         |   |                       |   |   |       |   |   |
| RPpos_514.2861_5.97    | RP    | pos        | 5.97            |            | 514.2861   |             | 4                                       |         | 0.70343                                 | 0.87905 | -0.07 | 0.01  | 0.69  | -0.12 | 0.57     | 0.42  |   | 0.67209               | 0.94598 | -0.09                    | 0.46  | -0.08                    | -0.17 | 0.19  | -0.25                      | -0.36 |      |          |   |         |   |                       |   |   |       |   |   |
| RPneg_514.30048_8.548  | RP    | neg        | 8.548           |            | 514.3005   |             | 4                                       |         | 0.00035                                 | 0.03453 | 0.89  | 0.10  | 1.29  | 1.23  | 0.72     | 0.89  |   | 0.05184               | 0.45366 | -0.58                    | -0.70 | -0.64                    | -0.50 | -0.46 | -0.55                      | -0.38 |      |          |   |         |   |                       |   |   |       |   |   |
| RPneg_514.30548_10.654 | RP    | neg        | 10.654          |            | 514.3055   |             | 4                                       |         | 0.01619                                 | 0.23584 | -0.45 | -0.06 | -0.11 | -0.29 | -0.45    | -0.44 |   | 0.66745               | 0.94439 | 0.10                     | 0.05  | 0.30                     | 0.13  | 0.22  | 0.00                       | -0.21 |      |          |   |         |   |                       |   |   |       |   |   |
| RPneg_514.32318_5.08   | RP    | neg        | 5.08            |            | 514.3232   |             | 4                                       |         | 0.99750                                 | 0.99506 | 0.00  | 0.18  | -0.34 | 0.01  | 0.19     | 0.24  |   | 0.00378               | 0.12663 | 1.27                     | 0.65  | 0.13                     | 0.20  | 0.68  | 3.68                       | -0.28 |      |          |   |         |   |                       |   |   |       |   |   |
| RPpos_514.3386_8.92    | RP    | pos        | 8.92            |            | 514.3386   | no autoMSMS | 4                                       |         | 0.00016                                 | 0.02584 | 0.02  | 0.07  | 0.17  | 0.04  | 0.15     | 0.45  |   | 0.26008               | 0.77434 | -0.25                    | -0.15 | 0.27                     | 0.07  | 0.14  | 0.39                       | 0.04  |      |          |   |         |   |                       |   |   |       |   |   |
| HILICpos_514.3564_0.4  | HILIC | pos        | 0.4             |            | 514.3564   |             | 4                                       |         | 0.66903                                 | 0.86191 | 0.06  | 0.31  | 0.40  | 0.03  | 0.00     | 0.31  |   | 0.76232               | 0.96284 | -0.13                    | -0.11 | 0.30                     | -0.08 | 0.12  | 0.48                       | 0.53  |      |          |   |         |   |                       |   |   |       |   |   |
| RPpos_514.3595_8.09    | RP    | pos        | 8.09            |            | 514.3595   |             | 4                                       |         | 0.61219                                 | 0.83427 | 0.12  | 0.02  | 0.44  | 0.13  | 0.18     | -0.17 |   | 0.61617               | 0.93203 | -0.30                    | -0.20 | 1.43                     | -0.17 | -0.85 | -0.63                      | -1.10 |      |          |   |         |   |                       |   |   |       |   |   |
| RPpos_514.62_10.5      | RP    | pos        | 10.5            |            | 514.6200   |             | 4                                       |         | 0.82936                                 | 0.93512 | -0.04 | -0.25 | 0.89  | 0.12  | -0.25    | 0.35  |   | 0.59691               | 0.92780 | -0.15                    | -0.25 | 0.17                     | -0.17 | 0.12  | -0.56                      | -0.36 |      |          |   |         |   |                       |   |   |       |   |   |
| RPpos_514.9529_10.5    | RP    | pos        | 10.5            |            | 514.9529   |             | 4                                       |         | 0.30176                                 | 0.63125 | -0.23 | -0.37 | 0.78  | -0.44 | -0.10    | 0.20  |   | 0.98428               | 0.99771 | -0.04                    | -0.23 | 0.00                     | 0.01  | 0.23  | -0.11                      | -0.24 |      |          |   |         |   |                       |   |   |       |   |   |
| RPneg_515.10352_7.67   | RP    | neg        | 7.67            |            | 515.1035   |             | 4                                       |         | 0.38524                                 | 0.69777 | -0.07 | -0.03 | 0.10  | -0.05 | 0.04     | -0.06 |   | 0.60161               | 0.92840 | 0.16                     | 0.09  | 0.27                     | 0.13  | 0.25  | 0.13                       | 0.02  |      |          |   |         |   |                       |   |   |       |   |   |
| RPneg_515.10364_2.391  | RP    | neg        | 2.391           |            | 515.1036   |             | 4                                       |         | 0.69049                                 | 0.87274 | 0.02  | 0.18  | 0.59  | 0.33  | -0.46    | -0.44 |   | 0.53996               | 0.91464 | -0.23                    | 0.07  | -0.06                    | 0.07  | -0.48 | -0.20                      | -0.75 |      |          |   |         |   |                       |   |   |       |   |   |
| RPneg_515.10449_8.17   | RP    | neg        | 8.17            |            | 515.1045   |             | 4                                       |         | 0.43763                                 | 0.73540 | -0.08 | -0.09 | 0.03  | -0.07 | 0.03     | -0.01 |   | 0.86479               | 0.97994 | 0.02                     | 0.02  | 0.01                     | -0.04 | 0.03  | 0.10                       | 0.04  |      |          |   |         |   |                       |   |   |       |   |   |
| RPneg_515.10468_6.991  | RP    | neg        | 6.991           |            | 515.1047   |             | 4                                       |         | 0.01650                                 | 0.23757 | -0.26 | 0.03  | -0.26 | -0.36 | -0.16    | -0.07 |   | 0.67870               | 0.94718 | -0.16                    | 0.00  | -0.04                    | -0.19 | -0.12 | -0.21                      | -0.02 |      |          |   |         |   |                       |   |   |       |   |   |
| RPneg_515.10608_2.811  | RP    | neg        | 2.811           |            | 515.1061   |             | 4                                       |         | 0.28878                                 | 0.62222 | -0.20 | 0.09  | 0.51  | -0.05 | -0.58    | -0.43 |   | 0.98160               | 0.99752 | -0.07                    | -0.08 | 0.06                     | 0.06  | 0.11  | -0.22                      | -0.42 |      |          |   |         |   |                       |   |   |       |   |   |
| RPneg_515.26556_9.271  | RP    | neg        | 9.271           |            | 515.2656   |             | 4                                       |         | 3.57E-07                                | 0.00051 | 1.03  | 0.96  | 1.11  | 1.29  | 0.90     | 1.06  |   | 0.35897               | 0.83442 | 0.36                     | 0.17  | 0.24                     | 0.29  | 0.67  | 0.24                       | 0.45  |      |          |   |         |   |                       |   |   |       |   |   |
| RPneg_515.27161_5.005  | RP    | neg        | 5.005           |            | 515.2716   |             | 4                                       |         | 0.27685                                 | 0.61158 | 0.28  | 0.22  | 0.59  | 0.27  | 0.67     | 0.40  |   | 0.73466               | 0.95858 | -0.11                    | -0.23 | 0.02                     | -0.19 | 0.12  | -0.27                      | -0.16 |      |          |   |         |   |                       |   |   |       |   |   |
| RPneg_515.28625_8.093  | RP    | neg        | 8.093           |            | 515.2863   |             | 4                                       |         | 0.79166                                 | 0.89658 | 0.09  | 0.20  | 0.30  | 0.15  | 0.30     | -0.47 |   | 0.20325               | 0.71948 | 1.24                     | 0.81  | 1.65                     | 1.92  | 1.31  | 1.11                       | 1.05  |      |          |   |         |   |                       |   |   |       |   |   |
| RPpos_515.3122_10.42   | RP    | pos        | 10.42           |            | 515.3122   |             | 4                                       |         | 0.11655                                 | 0.45246 | -0.43 | 0.52  | 0.35  | -0.32 | -0.28    | 0.24  |   | 0.05587               | 0.46666 | -0.28                    | -0.26 | -0.25                    | -0.24 | -0.44 | -0.12                      | -0.77 |      |          |   |         |   |                       |   |   |       |   |   |
| RPpos_515.3128_10.3    | RP    | pos        | 10.3            |            | 515.3128   |             | 4                                       |         | 0.02511                                 | 0.27745 | -0.34 | 0.07  | 0.03  | 0.07  | 0.22     | -0.32 |   | 0.17559               | 0.69019 | -0.15                    | -0.17 | -0.09                    | -0.14 | 0.04  | -0.18                      | -0.35 |      |          |   |         |   |                       |   |   |       |   |   |
| HILICneg_515.4107_0.39 | HILIC | neg        | 0.39            |            | 515.4107   |             | 4                                       |         | 0.11983                                 | 0.45560 | 0.34  | 0.17  | 0.25  | 0.18  | 0.98     | 0.16  |   | 0.56922               | 0.92115 | -0.17                    | -0.03 | -0.19                    | 0.17  | 0.04  | -0.22                      | -0.21 |      |          |   |         |   |                       |   |   |       |   |   |
| RPneg_515.41119_11.625 | RP    | neg        | 11.625          |            | 515.4112   |             | 4                                       |         | 0.13808                                 | 0.47769 | 0.11  | 0.04  | 0.12  | 0.06  | 0.45     | 0.27  |   | 0.71043               | 0.95280 | 0.01                     | -0.20 | 0.11                     | -0.10 | 0.33  | 0.00                       | -0.19 |      |          |   |         |   |                       |   |   |       |   |   |
| RPpos_515.4131_15.46   | RP    | pos        | 15.46           |            | 515.4131   |             | 4                                       |         | 0.51933                                 | 0.78761 | 0.09  | 1.49  | 0.14  | 0.55  | -0.12    | -0.06 |   | 0.01088               | 0.22187 | -0.40                    | -0.36 | -0.46                    | -0.18 | 0.10  | -0.42                      | -0.33 |      |          |   |         |   |                       |   |   |       |   |   |
| RPpos_515.4134_14.09   | RP    | pos        | 14.09           |            | 515.4134   |             | 4                                       |         | 0.84969                                 | 0.94362 | -0.01 | 1.01  | -0.11 | 0.77  | -0.32    | 0.03  |   | 0.02098               | 0.30615 | -0.44                    | -0.38 | -0.28                    | -0.23 | -0.28 | -0.37                      | -0.30 |      |          |   |         |   |                       |   |   |       |   |   |
| HILICneg_515.9081_1.46 | HILIC | neg        | 1.46            |            | 515.9081   |             | 4                                       |         | 0.77005                                 | 0.90966 | 0.01  | 0.38  | 0.46  | -0.02 | 0.04     | -0.10 |   | 0.52068               | 0.90888 | -0.23                    | -0.   |                          |       |       |                            |       |      |          |   |         |   |                       |   |   |       |   |   |

| Feature_ID             | Mode  | Ionization | Average_Rt.min. | Average_Mz | Metabolite                                            | MSMS        | ID_Level | HMDB_ID | IV-Alcohol self-administration (IV-ASA) |         |       |                       |       |       |        |                            |         | IV-Alcohol clamp (IV-AC) |                       |       |       |        |       |       |       |       |
|------------------------|-------|------------|-----------------|------------|-------------------------------------------------------|-------------|----------|---------|-----------------------------------------|---------|-------|-----------------------|-------|-------|--------|----------------------------|---------|--------------------------|-----------------------|-------|-------|--------|-------|-------|-------|-------|
|                        |       |            |                 |            |                                                       |             |          |         | Area Under the Curve (AUC)              |         |       | IV-Ghrelin or Placebo |       |       | BRAC=0 | Area Under the Curve (AUC) |         |                          | IV-Ghrelin or Placebo |       |       | BRAC=0 |       |       |       |       |
|                        |       |            |                 |            |                                                       |             |          |         | p                                       | q       | d     | d                     | -d    | -d    |        | -d                         | -d      | -d                       | p                     | q     | d     |        | d     | -d    | -d    | -d    |
| RPpos_518.3226_11.52   | RP    | pos        | 11.52           | 518.3226   |                                                       |             | 4        |         | 0.00724                                 | 0.16773 | -0.30 | 0.10                  | -0.04 | -0.15 | -0.01  | -0.35                      | 0.17471 | 0.68949                  | -0.22                 | -0.26 | -0.30 | -0.28  | -0.04 | -0.16 | -0.14 |       |
| RPpos_518.3226_11.08   | RP    | pos        | 11.08           | 518.3226   |                                                       |             | 4        |         | 0.12913                                 | 0.46546 | -0.25 | 0.07                  | -0.07 | -0.26 | -0.06  | 0.15                       | -0.22   | 0.08080                  | 0.53249               | -0.15 | -0.45 | 0.29   | -0.35 | 0.10  | -0.12 | -0.65 |
| RPpos_518.3229_9.96    | RP    | pos        | 9.96            | 518.3229   |                                                       |             | 4        |         | 0.38329                                 | 0.69665 | -0.13 | -0.22                 | -0.03 | 0.13  | 0.03   | 0.01                       | 0.00819 | 0.19314                  | 0.55                  | 0.79  | 0.90  | 0.42   | 0.76  | 0.14  | -0.22 |       |
| RPpos_518.3223_10.3    | RP    | pos        | 10.3            | 518.3230   |                                                       |             | 4        |         | 0.02777                                 | 0.28599 | -0.46 | 0.08                  | 0.02  | -0.34 | -0.29  | -0.33                      | 0.10663 | 0.58827                  | -0.15                 | -0.13 | -0.13 | -0.32  | 0.00  | -0.11 | -0.29 |       |
| RPpos_518.3231_9.83    | RP    | pos        | 9.83            | 518.3231   |                                                       |             | 4        |         | 0.01531                                 | 0.23245 | -0.31 | 0.08                  | -0.03 | -0.29 | 0.21   | 0.05                       | 0.02295 | 0.31915                  | 0.08                  | 0.13  | 0.54  | 0.06   | 0.62  | 0.07  | 0.34  |       |
| RPpos_518.3240_8.51    | RP    | pos        | 8.51            | 518.3240   |                                                       |             | 4        |         | 0.41566                                 | 0.72004 | 0.18  | 0.31                  | 0.29  | 0.32  | 0.51   | 0.00                       | 0.37926 | 0.81641                  | 0.23                  | 0.19  | 0.26  | 0.19   | 0.26  | 0.17  | 0.46  |       |
| RPpos_518.3361_6.9     | RP    | pos        | 6.9             | 518.3361   |                                                       |             | 4        |         | 0.15631                                 | 0.49930 | -0.41 | -0.34                 | 0.67  | -0.46 | -0.49  | 0.41                       | 0.40069 | 0.85821                  | -0.35                 | -0.20 | -0.12 | -0.19  | -0.03 | -0.44 | -0.62 |       |
| RPpos_518.353_6.64     | RP    | pos        | 6.64            | 518.3530   |                                                       |             | 4        |         | 0.31673                                 | 0.64006 | -0.28 | -0.23                 | 0.70  | 0.03  | -0.24  | 0.19                       | 0.48388 | 0.89667                  | -0.28                 | -0.22 | -0.11 | -0.11  | 0.06  | -0.70 | -0.31 |       |
| RPpos_518.3682_10.72   | RP    | pos        | 10.72           | 518.3682   |                                                       |             | 4        |         | 0.82663                                 | 0.93450 | 0.07  | -0.67                 | 0.25  | 0.51  | 0.07   | 0.29                       | 0.42008 | 0.86806                  | 0.15                  | -1.04 | 0.17  | -0.24  | 0.31  | 0.16  | 0.86  |       |
| HILICpos_518.369_0.37  | HILIC | pos        | 0.37            | 518.3690   |                                                       |             | 4        |         | 0.66402                                 | 0.85933 | -0.06 | 0.21                  | 0.47  | -0.02 | 0.29   | -0.30                      | 0.71136 | 0.95302                  | 0.10                  | -0.02 | 0.56  | 0.18   | -0.04 | -0.38 | 0.42  |       |
| RPpos_518.4085_14.09   | RP    | pos        | 14.09           | 518.4085   |                                                       |             | 4        |         | 0.81521                                 | 0.92958 | -0.09 | 0.85                  | -0.31 | 0.69  | -0.46  | 0.00                       | 0.09627 | 0.56598                  | -0.36                 | -0.46 | -0.19 | 0.47   | -0.07 | -0.40 | -0.30 |       |
| RPpos_518.4242_13.58   | RP    | pos        | 13.58           | 518.4242   |                                                       |             | 4        |         | 0.77531                                 | 0.91136 | 0.03  | 0.45                  | -0.09 | 0.97  | -0.50  | 0.16                       | 0.17818 | 0.69288                  | -0.44                 | -0.46 | -0.42 | 0.22   | -0.42 | -0.25 | -0.25 |       |
| RPpos_518.7909_10.25   | RP    | pos        | 10.25           | 518.7909   |                                                       |             | 4        |         | 0.99706                                 | 0.99887 | -0.04 | -0.07                 | 0.57  | 0.10  | 0.46   | 0.10                       | 0.97227 | 0.99673                  | -0.07                 | -0.06 | -0.09 | 0.19   | 0.10  | -0.21 | -0.36 |       |
| RPpos_518.793_10.54    | RP    | pos        | 10.54           | 518.7930   |                                                       |             | 4        |         | 0.70353                                 | 0.87908 | 0.06  | -0.19                 | 1.05  | 0.03  | 0.06   | 0.88                       | 0.12836 | 0.62081                  | -0.41                 | -0.12 | -0.44 | -0.34  | -0.15 | -0.67 | -0.09 |       |
| HILICneg_518.828_0.54  | HILIC | pos        | 0.54            | 518.8280   |                                                       |             | 4        |         | 0.57733                                 | 0.81684 | 0.10  | 0.16                  | 0.19  | 0.08  | 0.16   | 0.93                       | 0.36270 | 0.83696                  | 0.00                  | -0.12 | -0.10 | 0.04   | 0.10  | 0.08  | -0.05 |       |
| HILICneg_519.0612_4.21 | HILIC | neg        | 4.21            | 519.0612   |                                                       |             | 4        |         | 0.11336                                 | 0.44915 | -0.25 | 0.19                  | 0.68  | -0.04 | -0.80  | -0.64                      | 0.96681 | 0.99654                  | -0.09                 | 0.04  | 0.02  | 0.26   | 0.04  | -0.44 | -0.32 |       |
| RPneg_519.09735_8.17   | RP    | neg        | 8.17            | 519.0974   |                                                       |             | 4        |         | 0.62859                                 | 0.84277 | 0.03  | 0.09                  | -0.01 | 0.01  | 0.16   | 0.22                       | 0.35234 | 0.83210                  | -0.08                 | -0.05 | -0.09 | -0.04  | 0.09  | -0.12 | -0.32 |       |
| RPneg_519.15137_10.87  | RP    | neg        | 10.87           | 519.1514   |                                                       |             | 4        |         | 0.32905                                 | 0.65340 | 0.32  | 0.00                  | -0.20 | 0.50  | 0.96   | 0.28                       | 0.89898 | 0.98537                  | 0.03                  | -0.57 | 0.45  | -0.25  | 0.03  | -0.35 | -1.18 |       |
| RPpos_519.1719_7.41    | RP    | pos        | 7.41            | 519.1719   |                                                       |             | 4        |         | 0.90553                                 | 0.77552 | 0.07  | 0.14                  | 0.15  | 0.31  | 0.32   | 0.03                       | 0.01127 | 0.22588                  | 0.26                  | 0.17  | 0.35  | 0.12   | 0.59  | 0.21  | -0.11 |       |
| RPpos_519.2147_6.95    | RP    | pos        | 6.95            | 519.2147   |                                                       |             | 4        |         | 0.65341                                 | 0.84653 | 0.07  | 0.18                  | 0.55  | 0.03  | 0.39   | 0.35                       | 0.47790 | 0.89338                  | -0.30                 | 0.31  | -0.39 | 0.30   | 0.35  | 0.77  | -0.38 |       |
| RPneg_519.22412_9.139  | RP    | neg        | 9.139           | 519.2241   |                                                       |             | 4        |         | 0.25682                                 | 0.59492 | -0.07 | -0.01                 | -0.04 | -0.06 | -0.09  | 0.03                       | 0.18866 | 0.71469                  | 1.33                  | 1.14  | 1.54  | 1.22   | 1.51  | 1.85  | 1.11  |       |
| RPpos_519.2276_8.68    | RP    | pos        | 8.68            | 519.2276   |                                                       | no autoMSMS | 4        |         | 0.02025                                 | 0.25822 | 0.45  | -0.08                 | 0.82  | 0.49  | 0.88   | 0.62                       | 0.00000 | 0.00000                  | 0.56                  | -0.20 | 0.78  | 1.07   | 0.57  | 0.51  | -0.27 |       |
| HILICpos_519.2398_0.44 | HILIC | pos        | 0.44            | 519.2398   |                                                       |             | 4        |         | 0.83992                                 | 0.93962 | 0.07  | 0.16                  | 0.70  | 0.00  | 0.46   | 0.51                       | 0.20579 | 0.72174                  | 0.29                  | 0.42  | 0.27  | 0.07   | 0.86  | -0.09 | -0.16 |       |
| RPpos_519.242_5.97     | RP    | pos        | 5.97            | 519.2420   |                                                       |             | 4        |         | 0.66927                                 | 0.86194 | -0.05 | 0.02                  | 0.68  | -0.09 | 0.53   | 0.46                       | 0.63728 | 0.93621                  | -0.10                 | 0.38  | -0.08 | 0.00   | 0.12  | -0.36 | -0.44 |       |
| RPneg_519.40497_11.157 | RP    | neg        | 11.157          | 519.4050   |                                                       |             | 4        |         | 0.15231                                 | 0.49506 | 0.27  | -0.05                 | 0.28  | 0.26  | 0.51   | 0.38                       | 0.24707 | 0.76310                  | -0.32                 | 0.44  | -0.09 | -0.21  | -0.58 | -0.32 | -0.57 |       |
| RPpos_519.5839_11.01   | RP    | pos        | 11.01           | 519.5839   |                                                       |             | 4        |         | 0.56079                                 | 0.80943 | 0.17  | -0.32                 | 1.64  | 0.29  | -0.55  | 1.10                       | 0.67967 | 0.94739                  | -0.17                 | -0.08 | 0.11  | 0.09   | 0.76  | -0.25 | -0.28 |       |
| RPpos_519.9183_11.01   | RP    | pos        | 11.01           | 519.9183   |                                                       |             | 4        |         | 0.96993                                 | 0.98857 | 0.00  | 0.00                  | 0.63  | -0.10 | -0.13  | 0.75                       | 0.33018 | 0.82049                  | -0.28                 | 0.09  | -0.22 | -0.08  | 0.27  | -0.93 | -0.33 |       |
| HILICpos_520.0568_4.07 | HILIC | pos        | 4.07            | 520.0568   |                                                       |             | 4        |         | 0.42766                                 | 0.72875 | -0.23 | 0.47                  | 0.55  | 0.04  | -0.49  | -0.85                      | 0.73450 | 0.95858                  | 0.09                  | 0.43  | -0.53 | 0.39   | 0.61  | -0.33 | 0.13  |       |
| RPneg_520.16333_6.807  | RP    | neg        | 6.807           | 520.1633   |                                                       |             | 4        |         | 0.90460                                 | 0.96483 | -0.05 | -0.01                 | 0.06  | 0.03  | -0.01  | 0.10                       | 0.58436 | 0.92465                  | -0.03                 | -0.05 | -0.04 | -0.06  | 0.01  | -0.01 | -0.07 |       |
| RPneg_520.16333_6.948  | RP    | neg        | 6.948           | 520.1633   |                                                       |             | 4        |         | 0.98165                                 | 0.99289 | -0.02 | 0.03                  | -0.05 | 0.12  | 0.11   | 0.05                       | 0.35517 | 0.83325                  | -0.06                 | -0.20 | -0.17 | -0.07  | 0.05  | 0.00  | -0.02 |       |
| HILICneg_520.1649_3.21 | HILIC | neg        | 3.21            | 520.1649   |                                                       |             | 4        |         | 0.82005                                 | 0.93153 | -0.06 | 0.04                  | 0.09  | -0.11 | 0.00   | 0.36                       | 0.30483 | 0.80496                  | -0.08                 | -0.02 | -0.05 | -0.18  | -0.07 | -0.12 | 0.02  |       |
| RPpos_520.1779_7.65    | RP    | pos        | 7.65            | 520.1779   |                                                       |             | 4        |         | 0.48931                                 | 0.77067 | -0.05 | -0.07                 | 0.19  | -0.08 | 0.05   | -0.10                      | 0.49261 | 0.89839                  | 0.20                  | 0.17  | 0.23  | 0.14   | 0.31  | 0.18  | 0.13  |       |
| HILICpos_520.1783_8.14 | HILIC | pos        | 8.14            | 520.1783   |                                                       |             | 4        |         | 0.30236                                 | 0.63148 | -0.13 | -0.08                 | 0.01  | -0.10 | 0.04   | -0.05                      | 0.04720 | 0.89285                  | 0.01                  | 0.01  | -0.04 | -0.04  | 0.07  | 0.03  | 0.32  |       |
| HILICneg_520.2657_2.1  | HILIC | neg        | 2.1             | 520.2657   |                                                       |             | 4        |         | 0.02356                                 | 0.27111 | -0.40 | -0.16                 | -0.42 | -0.23 | -0.41  | -0.33                      | 0.51987 | 0.90879                  | -0.10                 | -0.13 | 0.31  | -0.13  | 0.08  | -0.19 | -0.38 |       |
| RPpos_520.296_9.17     | RP    | pos        | 9.17            | 520.2960   | adduct of chenoodeoxycholic acid<br>glycine conjugate |             | 4        |         | 0.00041                                 | 0.03710 | 0.71  | 0.13                  | 1.07  | 0.68  | 1.04   | 0.91                       | 0.00001 | 0.00290                  | 0.38                  | -0.22 | 0.61  | 0.74   | 0.37  | 0.34  | -0.39 |       |
| RPpos_520.2962_9.31    | RP    | pos        | 9.31            | 520.2962   |                                                       |             | 4        |         | 0.00028                                 | 0.03177 | 0.54  | 0.09                  | 0.98  | 0.50  | 0.65   | 0.85                       | 0.15036 | 0.65336                  | 0.60                  | -0.24 | 0.91  | 0.91   | 0.61  | 0.51  | -0.17 |       |
| HILICpos_520.3118_4.22 | HILIC | pos        | 4.22            | 520.3118   |                                                       |             | 4        |         | 0.10269                                 | 0.43541 | -0.42 | 0.13                  | -0.72 | -0.20 | 0.21   | 0.18                       | 0.46526 | 0.88771                  | -0.25                 | 0.62  | -0.50 | -0.60  | -0.05 | 0.37  | -0.30 |       |
| RPpos_520.3318_5.01    | RP    | pos        | 5.01            | 520.3318   |                                                       |             | 4        |         | 0.29708                                 | 0.62791 | -0.29 | -0.14                 | 0.68  | -0.28 | -0.29  | 0.17                       | 0.02708 | 0.34523                  | -0.46                 | -0.35 | -0.16 | -0.60  | -0.05 | -0.13 | -0.53 |       |
| HILICpos_520.3327_0.62 | HILIC | pos        | 0.62            | 520.3327   |                                                       |             | 4        |         | 0.18794                                 | 0.53402 | -0.37 | -0.22                 | 0.47  | -0.02 | -0.39  | 0.17                       | 0.03587 | 0.38709                  | -0.48                 | -0.36 | -0.34 | -0.47  | -0.16 | -0.07 | -0.33 |       |
| HILICpos_520.3384_1.24 | HILIC | pos        | 1.24            | 520.3384   |                                                       |             | 4        |         | 0.02152                                 | 0.26365 | -0.42 | -0.04                 | -0.11 | -0.17 | -0.28  | -0.51                      | 0.68539 | 0.94868                  | 0.06                  | 0.09  | -0.02 | 0.06   | 0.19  | 0.12  | -0.17 |       |
| RPpos_520.3386_11.08   | RP    | pos        | 11.08           | 520.3386   |                                                       |             | 4        |         | 0.25199                                 | 0.59087 | -0.26 | -0.22                 | -0.16 | 0.35  | 0.02   | -0.61                      | 0.64531 | 0.93817                  | 0.10                  | 0.33  | 0.01  | 0.08   | 0.18  | 0.20  | -0.34 |       |
| HILICpos_520.3387_1.12 | HILIC | pos        | 1.12            | 520.3387   |                                                       |             | 4        |         | 0.01155                                 | 0.20706 | -0.40 | 0.00                  | -0.07 | -0.26 | -0.20  | -0.63                      | 0.70012 | 0.95161                  | 0.06                  | 0.07  | -0.03 | 0.09   | 0.23  | 0.10  | -0.17 |       |
| RPpos_520.3403_10.12   | RP    | pos        | 10.12           | 520.3403   |                                                       |             | 4        |         | 0.01524                                 | 0.23217 | -0.41 | -0.19                 | -0.12 | -0.20 | -0.21  | -0.60                      | 0.54903 | 0.91715                  | 0.09                  | 0.04  | 0.13  | 0.07   | 0.20  | 0.12  | -0.18 |       |
| RPpos_520.343_11.52    | RP    | pos        | 11.52           | 520.3430   |                                                       |             | 4        |         | 0.08129                                 | 0.24669 | -0.41 | -0.16                 | -0.26 | -0.14 | -0.20  | -0.17                      | 0.32011 | 0.81514                  | 0.18                  | 0.22  | 0.26  |        |       |       |       |       |

| Feature_ID             | Mode  | Ionization | Average_Rt.min. | Average_Mz | Metabolite | MSMS        | ID_Level | HMDB_ID | IV-Alcohol self-administration (IV-ASA) |                       |        |                            |          |                       |        |                            |          |                       |        |                            |          | IV-Alcohol clamp (IV-AC)   |        |                            |                       |                       |        |                            |          |                       |        |  |  |  |
|------------------------|-------|------------|-----------------|------------|------------|-------------|----------|---------|-----------------------------------------|-----------------------|--------|----------------------------|----------|-----------------------|--------|----------------------------|----------|-----------------------|--------|----------------------------|----------|----------------------------|--------|----------------------------|-----------------------|-----------------------|--------|----------------------------|----------|-----------------------|--------|--|--|--|
|                        |       |            |                 |            |            |             |          |         | Area Under the Curve (AUC)              |                       |        | IV-Ghrelin or Placebo      |          |                       |        | BrAC=0                     |          |                       |        |                            |          | Area Under the Curve (AUC) |        |                            | IV-Ghrelin or Placebo |                       |        |                            | BrAC=0   |                       |        |  |  |  |
|                        |       |            |                 |            |            |             |          |         | p                                       | q                     | d      | d                          | d        | d                     | d      | p                          | q        | d                     | d      | d                          | d        | d                          | p      | q                          | d                     | d                     | d      | d                          | d        |                       |        |  |  |  |
|                        |       |            |                 |            |            |             |          |         | Baseline                                | IV-Ghrelin or Placebo | BrAC=0 | Area Under the Curve (AUC) | Baseline | IV-Ghrelin or Placebo | BrAC=0 | Area Under the Curve (AUC) | Baseline | IV-Ghrelin or Placebo | BrAC=0 | Area Under the Curve (AUC) | Baseline | IV-Ghrelin or Placebo      | BrAC=0 | Area Under the Curve (AUC) | Baseline              | IV-Ghrelin or Placebo | BrAC=0 | Area Under the Curve (AUC) | Baseline | IV-Ghrelin or Placebo | BrAC=0 |  |  |  |
| RPpos_523.6349_10.77   | RP    | pos        | 10.77           | 523.6349   |            |             | 4        |         | 0.87890                                 | 0.95476               | -0.07  | 0.07                       | 1.54     | -0.05                 | -0.18  | 0.46                       | 0.89865  | 0.98536               | -0.06  | -0.26                      | 0.26     | -0.28                      | 0.71   | -0.34                      | -0.38                 |                       |        |                            |          |                       |        |  |  |  |
| RPpos_523.6682_7.23    | RP    | pos        | 7.23            | 523.6682   |            |             | 4        |         | 0.90122                                 | 0.96357               | -0.04  | 0.12                       | 0.73     | 0.03                  | -0.01  | 0.61                       | 0.34315  | 0.82748               | -0.39  | 0.03                       | -0.11    | -0.67                      | 0.08   | 0.28                       | -0.77                 |                       |        |                            |          |                       |        |  |  |  |
| RPpos_523.9771_8.55    | RP    | pos        | 8.55            | 523.9771   |            |             | 4        |         | 0.66159                                 | 0.85808               | 0.16   | -0.27                      | 0.52     | 0.09                  | 0.28   | -0.03                      | 0.76463  | 0.96333               | 0.01   | 0.16                       | 0.13     | 0.02                       | -0.15  | -0.06                      | -0.12                 |                       |        |                            |          |                       |        |  |  |  |
| RPneg_524.19562_6.887  | RP    | neg        | 6.887           | 524.1956   |            |             | 4        |         | 0.65675                                 | 0.85625               | 0.00   | 0.13                       | 0.04     | 0.17                  | 0.11   | -0.05                      | 0.63344  | 0.93546               | 0.19   | 0.17                       | 0.19     | 0.17                       | 0.23   | 0.19                       | 0.20                  |                       |        |                            |          |                       |        |  |  |  |
| RPneg_524.24066_11.756 | RP    | neg        | 11.756          | 524.2407   |            |             | 4        |         | 0.81453                                 | 0.93863               | 0.18   | 0.51                       | 0.11     | 0.37                  | 0.06   | -0.20                      | 0.51781  | 0.88947               | 0.77   | 0.31                       | 0.42     | 0.21                       | 0.78   | 0.65                       | 0.07                  |                       |        |                            |          |                       |        |  |  |  |
| RPneg_524.25024_71.82  | RP    | neg        | 71.82           | 524.2502   |            |             | 4        |         | 0.83688                                 | 0.93863               | 0.07   | 0.04                       | 0.36     | 0.05                  | 0.06   | 0.11                       | 0.17184  | 0.84946               | 0.42   | 0.44                       | 0.49     | 0.04                       | 0.46   | 0.44                       | 0.44                  |                       |        |                            |          |                       |        |  |  |  |
| HILICpos_524.2683_0.39 | HILIC | pos        | 0.39            | 524.2683   |            |             | 4        |         | 0.44153                                 | 0.73833               | -0.28  | 0.43                       | 0.02     | -0.08                 | 0.38   | 0.17                       | 0.40640  | 0.86067               | -0.32  | 0.59                       | -0.02    | 0.70                       | -0.06  | -0.28                      | -0.49                 |                       |        |                            |          |                       |        |  |  |  |
| HILICpos_524.2691_0.47 | HILIC | pos        | 0.47            | 524.2691   |            |             | 4        |         | 0.32893                                 | 0.65340               | -0.35  | -0.11                      | -0.25    | -0.06                 | -0.16  | -0.21                      | 0.50746  | 0.90385               | -0.16  | -0.58                      | -0.50    | 0.56                       | -0.57  | 0.21                       | 0.22                  |                       |        |                            |          |                       |        |  |  |  |
| RPneg_524.26959_9.317  | RP    | neg        | 9.317           | 524.2696   |            |             | 4        |         | 0.00412                                 | 0.13143               | 0.23   | 0.18                       | 0.44     | 0.32                  | 0.30   | -0.10                      | 0.39138  | 0.85207               | 0.16   | 0.15                       | 0.09     | 0.15                       | 0.45   | 0.19                       | -0.12                 |                       |        |                            |          |                       |        |  |  |  |
| RPpos_524.2709_6.88    | RP    | pos        | 6.88            | 524.2709   |            |             | 4        |         | 0.51695                                 | 0.78649               | -0.24  | 0.34                       | 0.79     | -0.29                 | 0.63   | -0.04                      | 0.61388  | 0.93135               | -0.26  | 1.10                       | 0.02     | -0.29                      | 0.01   | -0.76                      | -0.95                 |                       |        |                            |          |                       |        |  |  |  |
| RPpos_524.2724_10.24   | RP    | pos        | 10.24           | 524.2724   |            |             | 4        |         | 0.86851                                 | 0.95065               | 0.07   | 0.11                       | 0.41     | 0.46                  | 0.24   | 0.45                       | 0.90814  | 0.98698               | 0.10   | -0.17                      | 0.17     | 0.53                       | 0.06   | -0.04                      | -0.14                 |                       |        |                            |          |                       |        |  |  |  |
| HILICpos_524.2739_1.78 | HILIC | pos        | 1.78            | 524.2739   |            |             | 4        |         | 0.67011                                 | 0.86246               | -0.11  | 0.03                       | 0.40     | 0.29                  | 0.53   | -0.08                      | 0.41899  | 0.86713               | 0.40   | 0.16                       | 0.58     | 0.22                       | 0.71   | 0.43                       | -0.30                 |                       |        |                            |          |                       |        |  |  |  |
| RPpos_524.2747_10.13   | RP    | pos        | 10.13           | 524.2747   |            |             | 4        |         | 0.85219                                 | 0.94447               | 0.06   | 0.01                       | 0.58     | 0.48                  | 0.49   | 0.30                       | 0.19064  | 0.70592               | 0.61   | 0.48                       | 0.35     | 0.57                       | 0.99   | 0.31                       | 0.47                  |                       |        |                            |          |                       |        |  |  |  |
| RPneg_524.27588_10.24  | RP    | neg        | 10.24           | 524.2759   |            |             | 4        |         | 0.17205                                 | 0.51739               | -0.33  | -0.25                      | -0.06    | -0.51                 | 0.32   | -0.05                      | 0.99775  | 0.99953               | 0.18   | 0.07                       | 0.17     | 0.26                       | 0.42   | 0.46                       | -0.07                 |                       |        |                            |          |                       |        |  |  |  |
| HILICneg_524.2773_1.88 | HILIC | neg        | 1.88            | 524.2773   |            |             | 4        |         | 0.16838                                 | 0.51353               | -0.34  | -0.28                      | -0.04    | -0.48                 | 0.33   | -0.16                      | 0.81310  | 0.97170               | 0.29   | 0.13                       | 0.32     | 0.38                       | 0.56   | 0.61                       | -0.05                 |                       |        |                            |          |                       |        |  |  |  |
| HILICneg_524.2775_1.65 | HILIC | neg        | 1.65            | 524.2775   |            |             | 4        |         | 0.17797                                 | 0.52361               | -0.35  | -0.30                      | -0.04    | -0.51                 | 0.31   | -0.11                      | 0.88844  | 0.98372               | 0.25   | 0.15                       | 0.45     | 0.40                       | 0.27   | 0.37                       | -0.04                 |                       |        |                            |          |                       |        |  |  |  |
| RPpos_524.2781_10      | RP    | pos        | 10              | 524.2781   |            |             | 4        |         | 0.18901                                 | 0.53554               | -0.22  | -0.11                      | -0.08    | -0.48                 | 0.37   | 0.23                       | 0.90479  | 0.98615               | 0.09   | -0.04                      | 0.15     | -0.09                      | 0.65   | 0.31                       | -0.42                 |                       |        |                            |          |                       |        |  |  |  |
| RPneg_524.29865_9.91   | RP    | neg        | 9.91            | 524.2987   |            |             | 4        |         | 0.04828                                 | 0.34231               | -0.65  | -0.30                      | -0.37    | -0.51                 | -0.46  | -0.07                      | 0.71346  | 0.95354               | -0.06  | -0.21                      | -0.01    | -0.49                      | -0.16  | 0.09                       | 0.30                  |                       |        |                            |          |                       |        |  |  |  |
| HILICpos_524.3062_3.95 | HILIC | pos        | 3.95            | 524.3062   |            |             | 4        |         | 0.25030                                 | 0.58922               | -0.22  | -0.09                      | -0.05    | -0.02                 | 0.14   | -0.48                      | 0.81022  | 0.97170               | 0.09   | 0.46                       | 0.34     | 0.01                       | 0.16   | -0.35                      | 0.26                  |                       |        |                            |          |                       |        |  |  |  |
| RPpos_524.3085_7.58    | RP    | pos        | 7.58            | 524.3085   |            |             | 4        |         | 0.00034                                 | 0.02198               | 1.23   | 0.45                       | 2.00     | 1.30                  | 1.08   | 0.70                       | 0.00293  | 0.10834               | 0.37   | 0.01                       | 1.30     | 0.49                       | 0.45   | 0.56                       | 0.03                  |                       |        |                            |          |                       |        |  |  |  |
| RPneg_524.33551_10.504 | RP    | neg        | 10.504          | 524.3355   |            |             | 4        |         | 0.82431                                 | 0.93346               | -0.02  | 0.12                       | 0.15     | -0.13                 | 0.01   | 0.19                       | 0.21082  | 0.72760               | -0.13  | -0.11                      | -0.09    | -0.11                      | -0.10  | -0.14                      | -0.22                 |                       |        |                            |          |                       |        |  |  |  |
| RPneg_524.33582_10.654 | RP    | neg        | 10.654          | 524.3358   |            |             | 4        |         | 0.01773                                 | 0.24428               | -0.42  | -0.04                      | -0.16    | -0.30                 | -0.27  | -0.39                      | 0.62360  | 0.93343               | 0.09   | 0.20                       | 0.17     | 0.12                       | 0.14   | 0.01                       | -0.14                 |                       |        |                            |          |                       |        |  |  |  |
| HILICneg_524.3362_1.13 | HILIC | neg        | 1.13            | 524.3362   |            |             | 4        |         | 0.00139                                 | 0.07596               | -0.59  | -0.17                      | -0.26    | -0.41                 | -0.65  | -0.34                      | 0.94996  | 0.99346               | 0.27   | 0.21                       | 0.01     | 0.24                       | 0.56   | 0.23                       | -0.12                 |                       |        |                            |          |                       |        |  |  |  |
| RPneg_524.33624_10.373 | RP    | neg        | 10.373          | 524.3362   |            |             | 4        |         | 0.75104                                 | 0.90082               | -0.11  | 0.00                       | 0.03     | -0.17                 | 0.04   | 0.04                       | 0.94528  | 0.99220               | 0.02   | 0.08                       | -0.10    | 0.10                       | -0.01  | 0.13                       | -0.04                 |                       |        |                            |          |                       |        |  |  |  |
| HILICpos_524.3705_1.18 | HILIC | pos        | 1.18            | 524.3705   |            |             | 4        |         | 0.00577                                 | 0.14844               | -0.45  | 0.21                       | -0.12    | -0.35                 | -0.39  | -0.50                      | 0.25673  | 0.77214               | 0.04   | 0.14                       | -0.14    | 0.08                       | 0.24   | 0.01                       | -0.07                 |                       |        |                            |          |                       |        |  |  |  |
| HILICpos_524.3712_1.07 | HILIC | pos        | 1.07            | 524.3712   |            |             | 4        |         | 0.96652                                 | 0.98800               | -0.02  | -0.04                      | 0.10     | -0.35                 | 1.35   | -0.46                      | 0.97755  | 0.99726               | 0.57   | -0.05                      | 0.54     | 0.29                       | 0.87   | 0.13                       | -0.27                 |                       |        |                            |          |                       |        |  |  |  |
| RPpos_524.3725_11.08   | RP    | pos        | 11.08           | 524.3725   |            |             | 4        |         | 0.04927                                 | 0.34519               | -0.33  | 0.03                       | -0.06    | -0.24                 | -0.03  | -0.42                      | 0.13680  | 0.63503               | -0.03  | 0.26                       | -0.05    | -0.22                      | 0.12   | 0.04                       | -0.20                 |                       |        |                            |          |                       |        |  |  |  |
| RPpos_524.3726_11.52   | RP    | pos        | 11.52           | 524.3726   |            |             | 4        |         | 0.01527                                 | 0.23240               | -0.39  | 0.20                       | -0.16    | -0.34                 | -0.13  | -0.51                      | 0.03418  | 0.37887               | -0.04  | -0.22                      | 0.00     | 0.13                       | -0.24  | 0.12                       | -0.07                 |                       |        |                            |          |                       |        |  |  |  |
| RPpos_524.3726_10.76   | RP    | pos        | 10.76           | 524.3726   |            |             | 4        |         | 0.02643                                 | 0.28143               | -0.39  | 0.00                       | -0.15    | -0.32                 | -0.19  | -0.41                      | 0.22043  | 0.73711               | 0.00   | 0.06                       | 0.02     | -0.02                      | 0.16   | -0.07                      | -0.22                 |                       |        |                            |          |                       |        |  |  |  |
| RPpos_525.0427_11.18   | RP    | pos        | 11.18           | 525.0427   |            |             | 4        |         | 0.00250                                 | 0.10246               | -1.10  | 0.13                       | -0.94    | -0.58                 | -1.60  | 0.02                       | 0.53299  | 0.91295               | -0.12  | 0.32                       | -0.08    | 0.28                       | -0.68  | -0.50                      | 0.05                  |                       |        |                            |          |                       |        |  |  |  |
| HILICneg_525.0602_4.89 | HILIC | neg        | 4.89            | 525.0602   |            |             | 4        |         | 0.72729                                 | 0.88895               | 0.12   | 0.56                       | 0.47     | -0.02                 | 0.19   | 0.36                       | 0.06124  | 0.48317               | -0.40  | -0.05                      | -0.62    | -0.16                      | -0.04  | -0.70                      | -0.59                 |                       |        |                            |          |                       |        |  |  |  |
| RPneg_525.17633_10.849 | RP    | neg        | 10.849          | 525.1763   |            |             | 4        |         | 0.11698                                 | 0.45278               | 0.28   | -0.12                      | 0.17     | 0.02                  | 1.25   | 0.01                       | 0.67289  | 0.94628               | 0.12   | 0.06                       | 0.33     | 0.10                       | 0.06   | 0.25                       | -0.11                 |                       |        |                            |          |                       |        |  |  |  |
| HILICpos_525.2494_0.48 | HILIC | pos        | 0.48            | 525.2494   |            |             | 4        |         | 0.00905                                 | 0.38849               | 0.55   | -0.56                      | 0.66     | -0.54                 | -0.75  | -0.35                      | 0.58050  | 0.93418               | -0.19  | -0.23                      | 0.66     | 0.01                       | 0.54   | -0.57                      | 0.19                  |                       |        |                            |          |                       |        |  |  |  |
| RPpos_525.2676_7.31    | RP    | pos        | 7.31            | 525.2676   |            | no autoMSMS | 4        |         | 0.00145                                 | 0.07704               | 1.14   | -0.06                      | 0.85     | 1.55                  | 2.59   | 0.07                       | 0.00057  | 0.03955               | 1.38   | -0.07                      | 0.17     | 0.79                       | 2.09   | 2.10                       | 1.80                  |                       |        |                            |          |                       |        |  |  |  |
| RPneg_525.26978_7.587  | RP    | neg        | 7.587           | 525.2698   |            |             | 4        |         | 1.355-05                                | 0.00648               | 1.47   | 0.06                       | 2.07     | 2.12                  | 2.20   | -0.22                      | 0.00000  | 0.00076               | 2.49   | -0.42                      | 0.25     | 2.49                       | 4.83   | 3.71                       | -0.02                 |                       |        |                            |          |                       |        |  |  |  |
| RPneg_525.27063_7.816  | RP    | neg        | 7.816           | 525.2706   |            |             | 4        |         | 0.13660                                 | 0.47649               | 0.82   | 1.03                       | 0.93     | 1.47                  | 0.61   | 1.22                       | 0.37472  | 0.84351               | 0.15   | 0.16                       | 0.14     | 0.14                       | 0.20   | 0.09                       | 0.20                  |                       |        |                            |          |                       |        |  |  |  |
| RPneg_525.27069_7.063  | RP    | neg        | 7.063           | 525.2707   |            |             | 4        |         | 0.00069                                 | 0.05157               | 0.99   | 0.09                       | 0.80     | 1.10                  | 1.97   | 1.14                       | 0.00089  | 0.05327               | 0.40   | -0.35                      | -0.23    | 0.20                       | 0.89   | 1.04                       | 0.66                  |                       |        |                            |          |                       |        |  |  |  |
| RPneg_525.27075_7.386  | RP    | neg        | 7.386           | 525.2708   |            |             | 4        |         | 0.00249                                 | 0.10246               | 1.06   | 0.85                       | 1.03     | 1.44                  | 1.28   | 0.95                       | 0.45123  | 0.88236               | 0.35   | 0.13                       | 0.06     | 0.40                       | 0.55   | 0.58                       | 0.31                  |                       |        |                            |          |                       |        |  |  |  |
| RPneg_525.27075_7.004  | RP    | neg        | 7.004           | 525.2708   |            |             | 4        |         | 0.00471                                 | 0.13733               | 0.74   | 0.07                       | 0.82     | 0.90                  | 1.30   | 0.03                       | 0.00376  | 0.12636               | 0.87   | -0.46                      | -0.21    | 0.86                       | 1.99   | 1.90                       | 0.11                  |                       |        |                            |          |                       |        |  |  |  |
| RPneg_525.27087_7.986  | RP    | neg        | 7.986           | 525.2709   |            |             | 4        |         | 0.02680                                 | 0.28244               | 0.74   | -0.05                      | 1.03     | 0.97                  | 1.20   | 0.21                       | 0.21724  | 0.73403               | 0.32   | -0.31                      | -0.09    | 0.37                       | 0.80   | 0.61                       | -0.01                 |                       |        |                            |          |                       |        |  |  |  |
| RPneg_525.27094_8.082  | RP    | neg        | 8.082           | 525.2709   |            |             | 4        |         | 0.00045                                 | 0.03900               | 1.77   | -0.01                      | 2.81     | 2.10                  | 1.86   | 0.00                       | 0.00039  | 0.03129               | 1.58   | -0.14                      | 0.46     | 2.57                       | 2.25   | 2.27                       | 0.13                  |                       |        |                            |          |                       |        |  |  |  |
| RPneg_525.27106_7.188  | RP    | neg        | 7.188           | 525.2711   |            |             | 4        |         | 0.17467                                 | 0.52011               | 0.56   | 0.73                       | 0.55     | 0.96                  | 0.47   | 1.06                       | 0.59421  | 0.92734               | 0.09   | -0.04                      | 0.02     | 0.03                       | 0.19   | 0.14                       | 0.22                  |                       |        |                            |          |                       |        |  |  |  |
| HILICneg_525.2712_4.17 | HILIC | neg        | 4.17            | 525.2712   |            |             | 4        |         | 0.00018                                 | 0.02597               | 1.07   | 0.16                       | 0.88     | 1.09                  | 2.16   | 1.26                       | 0.01396  | 0.25177               | 0.41   | -0.34                      | -0.13    | 0.12                       | 1.01   | 0.91                       | 0.73                  |                       |        |                            |          |                       |        |  |  |  |
| HILICpos_525.3068_0.43 | HILIC | pos        | 0.43            | 525.3068   |            |             | 4        |         | 0.69992                                 | 0.87732               | 0.08   | 0.12                       | 0.50     | 0.31                  | 0.12   | 0.78                       | 0.27636  | 0.78625               | -0.19  | -0.17                      | -0.07    | -0.33                      | 0.24   | -0.47                      | -0.34                 |                       |        |                            |          |                       |        |  |  |  |
| RPpos_525.3071_10.19   | RP    | pos        | 10.19           | 525.3071   |            |             | 4        |         | 0.84966                                 | 0.94362               | 0.01   | -0.09                      | 0.85     | 0.08                  | -0.06  | 0.81                       | 0.27991  | 0.78904               | -0.18  | -0.21                      | -0.05    | -0.18                      | -0.10  | -0.32                      | -0.25                 |                       |        |                            |          |                       |        |  |  |  |
| RPpos_525.3327_7.75    | RP    | pos        | 7.75            | 525.3327   |            |             | 4        |         | 0.66356                                 | 0.85911               | -0.16  | 0.12                       | 0.92     | -0.26                 | -0.16  | 0.95                       | 0.25732  | 0.72716               | -0.32  | -0.20                      | -0.06    | -0.33                      | -0.36  | -0.30                      | -0.35                 |                       |        |                            |          |                       |        |  |  |  |
| HILICpos_525.3336_0.53 | HILIC | pos        | 0.53            | 525.3336   |            |             | 4        |         | 0.33033                                 | 0.65452               | -0.29  | -0.14                      | 0.92     | -0.30                 | -0.36  | 0.40                       | 0.33028  | 0.82049               | -0.31  | 0.23                       | 0.05     | -0.34                      | -0.08  | -0.31                      | -0.41                 |                       |        |                            |          |                       |        |  |  |  |
| RPneg_526.18488_11.193 | RP    | neg        | 11.193          | 526.1849   |            |             | 4        |         | 0.30638                                 | 0.63523               | 0.41   | 0.27                       | 0.76     | 0.64                  | 0.62   | -0.22                      | 0.72522  | 0.95608               | -0.12  | -0.08                      | 0.09     | -0.1                       |        |                            |                       |                       |        |                            |          |                       |        |  |  |  |

| Feature_ID             | Mode  | ionization | Average_RT.min. | Average_Mz | Metabolite | MSMS | ID_Level | HMDB_ID | IV-Alcohol self-administration (IV-ASA) |         |       |                       |       |       |       |        |         | IV-Alcohol clamp (IV-AC)   |       |       |                       |       |       |        |       |  |
|------------------------|-------|------------|-----------------|------------|------------|------|----------|---------|-----------------------------------------|---------|-------|-----------------------|-------|-------|-------|--------|---------|----------------------------|-------|-------|-----------------------|-------|-------|--------|-------|--|
|                        |       |            |                 |            |            |      |          |         | Area Under the Curve (AUC)              |         |       | IV-Ghrelin or Placebo |       |       |       |        |         | Area Under the Curve (AUC) |       |       | IV-Ghrelin or Placebo |       |       |        |       |  |
|                        |       |            |                 |            |            |      |          |         | p                                       | q       | d     | d                     | d     | d     | d     | BrAc=0 | p       | q                          | d     | d     | d                     | d     | d     | BrAc=0 |       |  |
| RPpos_527.3342_9.3     | RP    | pos        | 9.3             | 527.3342   |            |      | 4        |         | 0.39386                                 | 0.70376 | 0.09  | -0.01                 | 0.52  | 0.09  | 0.20  | -0.03  | 0.71459 | 0.95354                    | -0.02 | -0.30 | 0.28                  | 0.03  | -0.10 | -0.02  | -0.15 |  |
| HILICneg_527.4095_0.39 | HILIC | neg        | 0.39            | 527.4095   |            |      | 4        |         | 0.05701                                 | 0.36031 | 0.36  | 0.26                  | 0.40  | 0.29  | 0.97  | 0.12   | 0.92215 | 0.98881                    | 0.03  | -0.12 | 0.27                  | -0.05 | 0.21  | 0.13   | -0.09 |  |
| RPneg_527.41058_11.643 | RP    | neg        | 11.643          | 527.4106   |            |      | 4        |         | 0.16220                                 | 0.50672 | 0.15  | 0.16                  | 0.19  | 0.22  | 0.28  | 0.44   | 0.98198 | 0.99752                    | -0.02 | 0.11  | 0.00                  | -0.02 | 0.08  | -0.16  | 0.34  |  |
| RPpos_527.6415_10.5    | RP    | pos        | 10.5            | 527.6415   |            |      | 4        |         | 0.82762                                 | 0.93481 | -0.09 | -0.20                 | 0.57  | 0.01  | -0.10 | 0.77   | 0.42024 | 0.86826                    | -0.18 | -0.24 | -0.03                 | -0.16 | 0.13  | -0.48  | -0.30 |  |
| RPpos_527.7878_10.5    | RP    | pos        | 10.55           | 527.7878   |            |      | 4        |         | 0.70510                                 | 0.87955 | -0.19 | -0.20                 | 0.92  | 0.16  | -0.11 | 0.10   | 0.88143 | 0.98398                    | -0.01 | -0.49 | 0.08                  | -0.09 | 0.02  | 0.02   | -0.17 |  |
| RPpos_527.9778_10.5    | RP    | pos        | 10.5            | 527.9778   |            |      | 4        |         | 0.51437                                 | 0.82939 | -0.17 | -0.37                 | 0.76  | 0.00  | 0.00  | 0.52   | 0.55343 | 0.81822                    | 0.17  | -0.15 | -0.01                 | -0.29 | 0.11  | -0.40  | -0.33 |  |
| RPneg_528.26172_7.994  | RP    | neg        | 7.994           | 528.2617   |            |      | 4        |         | 0.00778                                 | 0.17365 | 0.77  | 0.59                  | 0.99  | 0.80  | 0.90  | 0.46   | 0.66849 | 0.94464                    | 0.15  | 0.14  | 0.00                  | 0.19  | 0.19  | 0.31   | 0.08  |  |
| HILICneg_528.2621_3.33 | HILIC | neg        | 3.33            | 528.2621   |            |      | 4        |         | 0.29111                                 | 0.62396 | 0.09  | -0.03                 | 0.20  | 0.11  | 0.19  | 0.07   | 0.81630 | 0.97217                    | 0.01  | -0.07 | -0.07                 | -0.04 | 0.00  | 0.19   | 0.11  |  |
| HILICneg_528.2625_3.21 | HILIC | neg        | 3.21            | 528.2625   |            |      | 4        |         | 0.04801                                 | 0.34175 | 0.70  | 0.45                  | 0.79  | 0.87  | 1.52  | -0.19  | 0.48474 | 0.89695                    | 0.01  | -0.12 | 0.01                  | -0.03 | 0.18  | -0.05  | -0.05 |  |
| RPneg_528.26288_8.691  | RP    | neg        | 8.691           | 528.2629   |            |      | 4        |         | 0.00362                                 | 0.12259 | 0.43  | 0.10                  | 0.55  | 0.72  | 0.99  | -0.26  | 0.98611 | 0.99792                    | -0.04 | -0.15 | -0.09                 | -0.01 | 0.07  | 0.03   | -0.22 |  |
| RPneg_528.26324_7.239  | RP    | neg        | 7.239           | 528.2632   |            |      | 4        |         | 0.00018                                 | 0.02588 | 0.39  | 0.42                  | 0.54  | 0.40  | 0.53  | 0.22   | 0.42587 | 0.87093                    | 0.28  | 0.17  | 0.17                  | 0.25  | 0.38  | 0.39   | 0.32  |  |
| RPneg_528.26398_8.116  | RP    | neg        | 8.116           | 528.2640   |            |      | 4        |         | 0.00689                                 | 0.16370 | 0.30  | 0.19                  | 0.41  | 0.31  | 0.39  | 0.31   | 0.83092 | 0.97486                    | 0.00  | -0.13 | -0.08                 | -0.04 | 0.04  | 0.18   | 0.00  |  |
| RPneg_528.26398_8.769  | RP    | neg        | 8.769           | 528.2640   |            |      | 4        |         | 0.10770                                 | 0.44127 | 0.10  | 0.00                  | 0.23  | 0.09  | 0.16  | 0.10   | 0.88840 | 0.98372                    | 0.00  | -0.07 | -0.07                 | -0.07 | 0.05  | 0.09   | 0.07  |  |
| RPneg_528.26404_7.435  | RP    | neg        | 7.435           | 528.2640   |            |      | 4        |         | 0.53427                                 | 0.79582 | 0.65  | 0.69                  | 0.79  | 0.90  | 1.26  | -0.29  | 0.92469 | 0.98905                    | -0.04 | -0.11 | -0.03                 | -0.08 | -0.04 | 0.01   | 0.02  |  |
| RPneg_528.2641_7.702   | RP    | neg        | 7.702           | 528.2641   |            |      | 4        |         | 0.00431                                 | 0.13284 | 0.41  | 0.30                  | 0.73  | 0.56  | 0.45  | 0.06   | 0.21290 | 0.72984                    | 0.46  | 0.20  | 0.24                  | 0.44  | 0.62  | 0.87   | 0.29  |  |
| RPneg_528.2641_8.601   | RP    | neg        | 8.601           | 528.2641   |            |      | 4        |         | 0.00394                                 | 0.12874 | 0.63  | 0.21                  | 0.81  | 0.83  | 1.40  | -0.08  | 0.23792 | 0.75633                    | 0.10  | -0.03 | 0.02                  | 0.10  | 0.30  | 0.11   | -0.05 |  |
| RPneg_528.26416_7.086  | RP    | neg        | 7.086           | 528.2642   |            |      | 4        |         | 0.45029                                 | 0.74416 | 0.29  | 0.43                  | 0.49  | 0.47  | 0.59  | -0.35  | 0.71800 | 0.95488                    | -0.10 | -0.17 | -0.08                 | 0.06  | -0.13 | -0.11  | -0.18 |  |
| HILICneg_528.2849_1.38 | HILIC | neg        | 1.38            | 528.2849   |            |      | 4        |         | 0.12371                                 | 0.45914 | -0.21 | -0.08                 | -0.02 | -0.07 | -0.10 | -0.10  | 0.62224 | 0.93433                    | 0.13  | 0.67  | 0.03                  | 0.08  | 0.27  | 0.05   | 0.21  |  |
| RPneg_528.2869_10.059  | RP    | neg        | 10.059          | 528.2869   |            |      | 4        |         | 0.17443                                 | 0.51993 | -0.20 | 0.06                  | 0.90  | -0.10 | -0.06 | -0.24  | 0.89996 | 0.98550                    | 0.05  | 0.15  | 0.08                  | -0.00 | 0.10  | 0.02   | 0.21  |  |
| RPneg_528.28699_9.91   | RP    | neg        | 9.91            | 528.2870   |            |      | 4        |         | 0.23205                                 | 0.57346 | 0.17  | 0.07                  | 0.02  | 0.07  | -0.03 | -0.15  | 0.49177 | 0.89883                    | 0.30  | 0.25  | 0.20                  | 0.44  | 0.07  | 0.07   | 0.34  |  |
| RPneg_528.29388_8.051  | RP    | neg        | 8.051           | 528.2939   |            |      | 4        |         | 0.34652                                 | 0.66750 | -0.28 | 0.23                  | -0.03 | -0.23 | -0.39 | 0.02   | 0.12972 | 0.62317                    | -0.24 | -0.15 | -0.40                 | -0.20 | -0.11 | -0.25  | -0.30 |  |
| RPpos_528.3076_10.48   | RP    | pos        | 10.48           | 528.3076   |            |      | 4        |         | 0.53811                                 | 0.79779 | -0.07 | -0.10                 | 0.08  | 0.00  | 0.39  | 0.06   | 0.35181 | 0.83198                    | 0.39  | 0.40  | 0.38                  | 0.40  | 0.58  | 0.41   | 0.20  |  |
| HILICpos_528.3081_1.7  | HILIC | pos        | 1.7             | 528.3081   |            |      | 4        |         | 0.39688                                 | 0.70667 | -0.08 | 0.02                  | 0.04  | 0.00  | 0.32  | -0.19  | 0.34055 | 0.82618                    | 0.41  | 0.51  | 0.29                  | 0.28  | 0.82  | 0.40   | 0.18  |  |
| HILICneg_528.3088_1.85 | HILIC | neg        | 1.85            | 528.3088   |            |      | 4        |         | 0.79783                                 | 0.92198 | 0.03  | -0.03                 | 0.11  | 0.20  | 0.44  | 0.05   | 0.52565 | 0.91004                    | 0.27  | 0.42  | 0.13                  | 0.23  | 0.45  | 0.39   | 0.27  |  |
| RPneg_528.30945_10.246 | RP    | neg        | 10.246          | 528.3095   |            |      | 4        |         | 0.03713                                 | 0.31380 | -0.37 | 0.02                  | 0.05  | -0.25 | 0.05  | -0.32  | 0.74241 | 0.96009                    | 0.28  | 0.46  | 0.14                  | 0.15  | 0.29  | 0.20   | -0.12 |  |
| RPneg_528.31012_10.527 | RP    | neg        | 10.527          | 528.3101   |            |      | 4        |         | 0.37814                                 | 0.69315 | -0.03 | 0.14                  | 0.02  | 0.19  | 0.36  | 0.12   | 0.55132 | 0.91756                    | 0.25  | 0.37  | 0.31                  | 0.32  | 0.40  | 0.12   | 0.12  |  |
| RPpos_528.3163_8.67    | RP    | pos        | 8.67            | 528.3163   |            |      | 4        |         | 0.18351                                 | 0.52966 | 0.17  | -0.13                 | 0.49  | 0.34  | 0.23  | -0.16  | 0.20777 | 0.72383                    | 0.17  | -0.06 | -0.09                 | -0.27 | 0.39  | 0.33   | 0.00  |  |
| HILICpos_528.3743_0.4  | HILIC | pos        | 0.4             | 528.3743   |            |      | 4        |         | 0.78511                                 | 0.91566 | -0.04 | 0.22                  | 0.46  | 0.05  | 0.03  | -0.01  | 0.53766 | 0.91464                    | -0.29 | -0.11 | 0.28                  | -0.22 | -0.16 | -0.58  | 0.29  |  |
| RPpos_528.4615_12.61   | RP    | pos        | 12.61           | 528.4615   |            |      | 4        |         | 0.09897                                 | 0.42958 | 0.67  | 0.15                  | 1.30  | 1.17  | 0.55  | -0.59  | 0.91546 | 0.98777                    | 0.13  | -0.16 | 0.02                  | 0.26  | 0.35  | 0.28   | -0.06 |  |
| HILICneg_529.061_0.5   | HILIC | neg        | 0.5             | 529.0610   |            |      | 4        |         | 0.96901                                 | 0.98841 | -0.01 | -0.10                 | 0.13  | 0.60  | -0.04 | -0.24  | 0.97640 | 0.99711                    | 0.00  | -0.25 | -0.11                 | -0.17 | 0.13  | 0.11   | -0.11 |  |
| HILICneg_529.0896_4.21 | HILIC | neg        | 4.21            | 529.0896   |            |      | 4        |         | 0.03200                                 | 0.29947 | -0.22 | -0.16                 | 0.65  | 0.03  | -0.82 | -0.74  | 0.98812 | 0.99810                    | -0.05 | 0.23  | -0.01                 | -0.01 | 0.01  | -0.02  | -0.33 |  |
| HILICneg_529.1805_1.44 | HILIC | neg        | 1.44            | 529.1805   |            |      | 4        |         | 0.21905                                 | 0.56125 | 0.14  | 0.21                  | 0.26  | 0.10  | 0.32  | 0.20   | 0.48004 | 0.89457                    | -0.01 | -0.15 | -0.03                 | 0.00  | 0.10  | -0.01  | -0.01 |  |
| RPneg_529.2028_9.157   | RP    | neg        | 9.157           | 529.2028   |            |      | 4        |         | 0.48404                                 | 0.76700 | -0.12 | 0.07                  | -0.18 | 0.09  | -0.10 | -0.26  | 0.36528 | 0.83811                    | -0.15 | 0.07  | -0.07                 | -0.25 | -0.22 | -0.10  | 0.12  |  |
| RPpos_529.2258_6.88    | RP    | pos        | 6.88            | 529.2258   |            |      | 4        |         | 0.56612                                 | 0.81226 | -0.24 | 0.47                  | 0.33  | -0.16 | 0.46  | 0.51   | 0.85576 | 0.97868                    | -0.10 | 1.11  | -0.13                 | -0.62 | 0.15  | 0.07   | -0.76 |  |
| HILICpos_529.2408_5.8  | HILIC | pos        | 5.8             | 529.2408   |            |      | 4        |         | 0.90184                                 | 0.96375 | 0.10  | 0.43                  | 0.48  | 0.21  | 0.41  | -0.55  | 0.06476 | 0.49304                    | 0.83  | 0.53  | 0.36                  | 1.26  | 0.86  | 0.10   | 0.09  |  |
| RPneg_529.28638_9.881  | RP    | neg        | 9.881           | 529.2864   |            |      | 4        |         | 0.21879                                 | 0.56099 | -0.20 | 0.12                  | -0.12 | 0.07  | -0.11 | -0.14  | 0.40171 | 0.85869                    | -0.32 | -0.24 | -0.57                 | -0.14 | -0.02 | -0.31  | -0.22 |  |
| HILICneg_529.4261_0.39 | HILIC | neg        | 0.39            | 529.4261   |            |      | 4        |         | 0.08206                                 | 0.40662 | 0.38  | 0.38                  | 0.26  | 0.40  | 1.09  | 0.16   | 0.75450 | 0.96233                    | -0.01 | 0.16  | -0.01                 | -0.07 | 0.08  | 0.08   | -0.24 |  |
| RPneg_529.42664_11.807 | RP    | neg        | 11.807          | 529.4266   |            |      | 4        |         | 0.81324                                 | 0.92887 | -0.02 | 0.25                  | -0.21 | 0.29  | 0.13  | 0.01   | 0.54791 | 0.91689                    | 0.32  | 1.06  | 0.61                  | 0.79  | 0.72  | -0.29  | -0.24 |  |
| RPneg_529.4267_11.982  | RP    | neg        | 11.982          | 529.4267   |            |      | 4        |         | 0.13402                                 | 0.47291 | 0.12  | 0.20                  | 0.26  | 0.18  | 0.35  | 0.18   | 0.76387 | 0.96328                    | -0.03 | 0.18  | -0.02                 | -0.07 | 0.01  | 0.00   | -0.07 |  |
| RPneg_529.42676_11.882 | RP    | neg        | 11.882          | 529.4268   |            |      | 4        |         | 0.08747                                 | 0.41381 | 0.09  | 0.14                  | 0.23  | 0.14  | 0.33  | 0.20   | 0.94641 | 0.99263                    | 0.03  | 0.04  | -0.04                 | 0.01  | 0.22  | 0.06   | -0.18 |  |
| RPpos_529.4279_14.09   | RP    | pos        | 14.09           | 529.4279   |            |      | 4        |         | 0.63641                                 | 0.84610 | -0.13 | 0.78                  | -0.32 | 0.45  | -0.28 | -0.19  | 0.05857 | 0.47557                    | -0.40 | -0.41 | -0.31                 | 0.26  | -0.30 | 0.13   | -0.31 |  |
| RPpos_529.4283_14.68   | RP    | pos        | 14.68           | 529.4283   |            |      | 4        |         | 0.96523                                 | 0.98780 | -0.06 | 0.50                  | -0.15 | 0.29  | -0.25 | 0.16   | 0.00129 | 0.06639                    | -0.42 | -0.47 | -0.48                 | 0.31  | -0.21 | -0.40  | -0.29 |  |
| RPpos_529.4285_14.51   | RP    | pos        | 14.51           | 529.4285   |            |      | 4        |         | 0.75460                                 | 0.90274 | 0.03  | 1.18                  | -0.17 | 0.10  | 0.10  | -0.05  | 0.06380 | 0.48989                    | -0.28 | -0.35 | 0.14                  | -0.41 | -0.38 | -0.40  | -0.32 |  |
| RPpos_529.804_10.86    | RP    | pos        | 10.86           | 529.8040   |            |      | 4        |         | 0.08108                                 | 0.40571 | -0.36 | 0.03                  | -0.14 | -0.43 | -0.15 | -0.37  | 0.41440 | 0.86472                    | -0.08 | 0.14  | 0.24                  | 0.06  | 0.20  | -0.52  | -0.26 |  |
| RPneg_530.16364_5.408  | RP    | neg        | 6.408           | 530.1636   |            |      | 4        |         | 0.63638                                 | 0.84610 | 0.29  | 0.24                  | 0.54  | 0.54  | 0.46  | -0.69  | 0.03067 | 0.36580                    | 1.02  | 0.90  | 0.92                  | 1.14  | 1.04  | 0.94   | 1.23  |  |
| RPpos_530.2523_11.22   | RP    | pos        | 11.22           | 530.2523   |            |      | 4        |         | 0.56643                                 | 0.81229 | -0.15 | -0.36                 | 0.71  | -0.04 | -0.75 | 0.83   | 0.83643 | 0.38941                    | -0.52 | -0.36 | -0.12                 | -0.50 | -0.56 | -0.54  | -0.19 |  |
| RPpos_530.2794_8.75    | RP    | pos        | 8.75            | 530.2794   |            |      | 4        |         | 0.06241                                 | 0.36949 | -0.12 | 0.00                  | 0.34  | 0.10  | 0.15  | 0.06   | 0.84788 | 0.97732                    | 0.00  | -0.05 | -0.06                 | 0.07  | 0.08  | 0.06   | 0.09  |  |
| RPneg_530.2818_10.059  | RP    | neg        | 10.059          | 530.2818   |            |      | 4        |         | 0.09099                                 | 0.41995 | -0.23 | 0.04                  | 0.06  | -0.16 | -0.10 | -0.31  | 0.71311 | 0.95354                    | -0.15 | 0.26  | 0.30                  | 0.14  | -0.01 | 0.13   | 0.28  |  |
| HILICneg_530.3003_1.19 | HILIC | neg        | 1.19            | 530.3003   |            |      | 4        |         | 0.03770                                 | 0.31436 | -0.46 | 0.54                  | -0.01 | -0.17 | -0.49 | -0.17  | 0.01296 | 0.24372                    | 0.30  | -0.47 | -0.41                 | -0.45 | -0.26 | -0.32  | -0.38 |  |
| HILICneg_530.3006_1.35 | HILIC | neg        | 1.35            | 530.3006   |            |      | 4        |         | 0.15950                                 | 0.50300 |       |                       |       |       |       |        |         |                            |       |       |                       |       |       |        |       |  |



| Feature_ID             |       | Mode | Ionization | Average Rt.min. | Average Mz                                        | Metabolite | MSMS | ID_Level | HMDB_ID  | IV-Alcohol self-administration (IV-ASA) |         |        |          |        |                       |          |         |         |         | IV-Alcohol clamp (IV-AC)   |         |        |        |          |                       |        |        |       |       |   |   |   |   |
|------------------------|-------|------|------------|-----------------|---------------------------------------------------|------------|------|----------|----------|-----------------------------------------|---------|--------|----------|--------|-----------------------|----------|---------|---------|---------|----------------------------|---------|--------|--------|----------|-----------------------|--------|--------|-------|-------|---|---|---|---|
|                        |       |      |            |                 |                                                   |            |      |          |          | Area Under the Curve (AUC)              |         |        |          |        | IV-Ghrelin or Placebo |          |         |         |         | Area Under the Curve (AUC) |         |        |        |          | IV-Ghrelin or Placebo |        |        |       |       |   |   |   |   |
|                        |       |      |            |                 |                                                   |            |      |          |          | p                                       | q       | d      | d        | d      | d                     | d        | d       | p       | q       | d                          | d       | d      | d      | d        | p                     | q      | d      | d     | d     | d | d | d | d |
|                        |       |      |            |                 |                                                   |            |      |          |          | Baseline                                | IV-ASA  | BrAc=0 | Baseline | IV-ASA | BrAc=0                | Baseline | Post-LD | IV-ASA  | BrAc=0  | Baseline                   | Post-LD | IV-ASA | BrAc=0 | Baseline | Post-LD               | IV-ASA | BrAc=0 |       |       |   |   |   |   |
| HILICpos_533.2369_5.64 | HILIC | pos  | 5.64       | 533.2369        |                                                   |            |      | 4        | 533.2369 | 0.63615                                 | 0.84600 | 0.10   | 0.43     | 0.21   | 0.49                  | 0.34     | -0.35   | 0.14208 | 0.64445 | 0.33                       | 0.12    | 0.11   | 0.39   | 0.40     | 0.59                  | 0.40   | 0.59   | 0.40  |       |   |   |   |   |
| RPneg_533.23724_8.39   | RP    | neg  | 8.39       | 533.2372        |                                                   |            |      | 4        | 533.2372 | 0.01746                                 | 0.24235 | 0.30   | 0.14     | 0.53   | 0.43                  | 0.35     | 0.26    | 0.36154 | 0.83579 | 0.15                       | -0.05   | 0.08   | 0.24   | 0.32     | 0.06                  | 0.24   | 0.06   | 0.24  |       |   |   |   |   |
| RPpos_533.2867_10.83   | RP    | pos  | 10.83      | 533.2867        |                                                   |            |      | 4        | 533.2867 | 0.94924                                 | 0.98121 | -0.07  | -0.04    | 0.89   | -0.04                 | 0.13     | 0.20    | 0.49956 | 0.90107 | -0.25                      | -0.27   | -0.15  | -0.22  | -0.01    | -0.42                 | -0.42  | -0.47  | -0.47 |       |   |   |   |   |
| RPpos_533.2972_11      | RP    | pos  | 11         | 533.2972        |                                                   |            |      | 4        | 533.2972 | 0.87594                                 | 0.95348 | -0.08  | -0.46    | 0.87   | -0.12                 | 0.06     | 0.67    | 0.30922 | 0.80799 | -0.35                      | -0.17   | -0.11  | -0.28  | -0.15    | -0.57                 | -0.57  | -0.52  | -0.52 |       |   |   |   |   |
| RPpos_533.3116_9.23    | RP    | pos  | 9.23       | 533.3116        |                                                   |            |      | 4        | 533.3116 | 0.36908                                 | 0.58740 | 0.25   | 0.29     | 0.51   | 0.46                  | 0.37     | 0.26    | 0.09773 | 0.95983 | -0.05                      | -0.06   | 0.15   | 0.20   | 0.06     | -0.26                 | -0.20  | -0.20  | -0.20 |       |   |   |   |   |
| RPpos_533.3259_8.68    | RP    | pos  | 8.68       | 533.3259        |                                                   |            |      | 4        | 533.3259 | 0.05778                                 | 0.36207 | 0.15   | 0.11     | 0.67   | 0.38                  | 0.27     | 0.22    | 0.08739 | 0.61765 | 0.32                       | 0.27    | 0.27   | 0.28   | 0.33     | 0.62                  | 0.24   | 0.65   | 0.65  |       |   |   |   |   |
| RPpos_533.3397_10.55   | RP    | pos  | 10.55      | 533.3397        |                                                   |            |      | 4        | 533.3397 | 0.00400                                 | 0.13435 | -0.44  | 0.15     | -0.15  | -0.37                 | -0.20    | -0.56   | 0.83299 | 0.97501 | 0.04                       | -0.10   | 0.04   | 0.04   | 0.07     | 0.20                  | 0.20   | -0.05  | -0.05 |       |   |   |   |   |
| HILICpos_533.3398_0.64 | HILIC | pos  | 0.64       | 533.3398        |                                                   |            |      | 4        | 533.3398 | 0.22324                                 | 0.56572 | -0.35  | 0.04     | 0.77   | -0.42                 | -0.32    | 0.55    | 0.03195 | 0.36988 | -0.33                      | -0.28   | -0.16  | -0.41  | -0.02    | -0.05                 | -0.44  | -0.44  |       |       |   |   |   |   |
| HILICneg_533.3831_0.4  | HILIC | neg  | 0.4        | 533.3831        |                                                   |            |      | 4        | 533.3831 | 0.02084                                 | 0.26098 | 0.69   | 0.09     | 0.64   | 0.58                  | 1.18     | 0.25    | 0.43439 | 0.87583 | -0.20                      | -0.26   | -0.17  | -0.20  | -0.16    | -0.26                 | -0.12  | -0.12  | -0.12 |       |   |   |   |   |
| HILICneg_534.2363_2.05 | HILIC | neg  | 2.05       | 534.2363        |                                                   |            |      | 4        | 534.2363 | 0.45122                                 | 0.74468 | -0.17  | -0.11    | 0.44   | 0.05                  | -0.03    | -0.07   | 0.84058 | 0.97628 | 0.02                       | -0.02   | 0.03   | -0.19  | 0.27     | 0.17                  | 0.17   | -0.21  | -0.21 |       |   |   |   |   |
| HILICneg_534.2494_1.39 | HILIC | neg  | 1.39       | 534.2494        |                                                   |            |      | 4        | 534.2494 | 0.00002                                 | 0.00756 | 0.93   | 0.66     | 1.11   | 1.30                  | 0.92     | 0.66    | 0.22364 | 0.74032 | 0.44                       | 0.18    | 0.35   | 0.37   | 0.56     | 0.73                  | 0.10   | 0.10   | 0.10  |       |   |   |   |   |
| RPneg_534.25061_9.27   | RP    | neg  | 9.27       | 534.2506        |                                                   |            |      | 4        | 534.2506 | 0.00004                                 | 0.01030 | 0.91   | 0.64     | 1.19   | 1.20                  | 0.96     | 0.76    | 0.29179 | 0.79623 | 0.36                       | 0.20    | 0.24   | 0.34   | 0.59     | 0.56                  | 0.10   | 0.10   | 0.10  |       |   |   |   |   |
| RPpos_534.2639_11      | RP    | pos  | 11         | 534.2639        |                                                   |            |      | 4        | 534.2639 | 0.34782                                 | 0.66845 | 0.14   | -0.77    | 0.86   | 0.48                  | 0.07     | 1.34    | 0.42062 | 0.86860 | -0.27                      | -0.23   | -0.26  | 0.05   | -0.20    | -0.20                 | -0.46  | -0.46  | -0.46 |       |   |   |   |   |
| RPpos_534.2755_9.17    | RP    | pos  | 9.17       | 534.2755        | adduct of chenodeoxycholic acid glycine conjugate |            |      | 4        | 534.2755 | 0.00038                                 | 0.03580 | 0.77   | 0.09     | 1.03   | 0.89                  | 1.14     | 0.82    | 0.00000 | 0.00017 | 0.36                       | -0.22   | 0.55   | 0.72   | 0.36     | 0.34                  | 0.34   | 0.34   | -0.33 | -0.33 |   |   |   |   |
| RPneg_534.28369_9.789  | RP    | neg  | 9.789      | 534.2837        |                                                   |            |      | 4        | 534.2837 | 0.17574                                 | 0.52100 | -0.32  | -0.34    | -0.24  | -0.16                 | -0.21    | -0.50   | 0.33831 | 0.82464 | 0.61                       | 0.60    | 0.42   | 0.60   | 0.55     | 0.59                  | 0.37   | 0.37   | 0.37  |       |   |   |   |   |
| HILICpos_534.2943_1.27 | HILIC | pos  | 1.27       | 534.2943        |                                                   |            |      | 4        | 534.2943 | 0.09683                                 | 0.42689 | -0.43  | 0.16     | -0.08  | -0.24                 | -0.05    | -0.11   | 0.14755 | 0.65073 | -0.12                      | -0.02   | -0.44  | -0.33  | 0.03     | -0.19                 | -0.41  | -0.41  | -0.41 |       |   |   |   |   |
| RPpos_534.2944_10.3    | RP    | pos  | 10.3       | 534.2944        |                                                   |            |      | 4        | 534.2944 | 0.00094                                 | 0.32333 | -0.40  | 0.07     | -0.05  | -0.15                 | -0.21    | -0.31   | 0.24511 | 0.75894 | -0.16                      | -0.18   | -0.23  | -0.31  | 0.15     | -0.03                 | -0.64  | -0.64  | -0.64 |       |   |   |   |   |
| RPpos_534.2956_10.43   | RP    | pos  | 10.43      | 534.2956        |                                                   |            |      | 4        | 534.2956 | 0.12205                                 | 0.45740 | -0.34  | 0.22     | -0.55  | 0.28                  | -0.33    | 0.27    | 0.44786 | 0.88099 | 0.31                       | -0.17   | 0.32   | 0.52   | 0.62     | 0.48                  | 0.45   | 0.08   | 0.08  |       |   |   |   |   |
| HILICneg_534.2963_1.14 | HILIC | pos  | 1.14       | 534.2963        |                                                   |            |      | 4        | 534.2963 | 0.03362                                 | 0.23184 | -0.34  | 0.28     | 0.05   | -0.28                 | -0.22    | -0.35   | 0.33899 | 0.75656 | 0.00                       | 0.01    | 0.06   | 0.03   | 0.16     | 0.08                  | 0.31   | 0.31   | 0.31  |       |   |   |   |   |
| RPpos_534.3101_8.19    | RP    | pos  | 8.19       | 534.3101        |                                                   |            |      | 4        | 534.3101 | 0.54789                                 | 0.80287 | 0.20   | 0.00     | 0.45   | 0.16                  | 0.26     | 1.22    | 0.40085 | 0.85821 | -0.21                      | -0.26   | -0.12  | -0.13  | -0.37    | -0.33                 | -0.14  | -0.14  | -0.14 |       |   |   |   |   |
| HILICneg_534.3117_1.7  | HILIC | pos  | 1.7        | 534.3117        |                                                   |            |      | 4        | 534.3117 | 0.38474                                 | 0.69734 | 0.20   | -0.08    | 0.54   | 0.22                  | 0.54     | 0.48    | 0.62030 | 0.93310 | -0.16                      | -0.21   | -0.13  | -0.19  | 0.03     | -0.28                 | -0.30  | -0.30  | -0.30 |       |   |   |   |   |
| HILICpos_534.312_0.43  | HILIC | pos  | 0.43       | 534.3120        |                                                   |            |      | 4        | 534.3120 | 0.80095                                 | 0.92319 | 0.01   | 0.00     | 0.30   | 0.21                  | 0.10     | 0.61    | 0.72331 | 0.95590 | -0.14                      | -0.22   | -0.05  | -0.17  | 0.04     | -0.42                 | -0.18  | -0.18  | -0.18 |       |   |   |   |   |
| RPpos_534.3122_5.01    | RP    | pos  | 5.01       | 534.3122        |                                                   |            |      | 4        | 534.3122 | 0.71186                                 | 0.88242 | 0.09   | -0.14    | 0.45   | 0.14                  | 0.41     | 0.63    | 0.54273 | 0.91492 | -0.21                      | -0.34   | -0.20  | -0.10  | -0.13    | -0.12                 | -0.44  | -0.44  | -0.44 |       |   |   |   |   |
| RPpos_534.3157_10      | RP    | pos  | 10         | 534.3157        |                                                   |            |      | 4        | 534.3157 | 0.01855                                 | 0.24816 | -0.40  | 0.01     | -0.05  | -0.25                 | -0.33    | -0.69   | 0.72822 | 0.95678 | -0.04                      | -0.18   | 0.03   | 0.11   | 0.10     | 0.00                  | -0.16  | -0.16  | -0.16 |       |   |   |   |   |
| RPpos_534.3163_8.82    | RP    | pos  | 8.82       | 534.3163        |                                                   |            |      | 4        | 534.3163 | 0.21186                                 | 0.55462 | -0.27  | -0.18    | -0.11  | -0.23                 | -0.14    | -0.44   | 0.05628 | 0.46862 | -0.06                      | -0.03   | -0.09  | -0.24  | 0.06     | 0.03                  | 0.04   | 0.04   | 0.04  |       |   |   |   |   |
| RPpos_534.3177_9.52    | RP    | pos  | 9.52       | 534.3177        |                                                   |            |      | 4        | 534.3177 | 0.99655                                 | 0.99872 | 0.09   | 0.20     | 0.23   | 0.16                  | 0.31     | 0.06    | 0.92489 | 0.98905 | -0.03                      | 0.01    | -0.11  | 0.05   | 0.07     | 0.02                  | -0.14  | -0.14  | -0.14 |       |   |   |   |   |
| RPpos_534.3474_5.59    | RP    | pos  | 5.59       | 534.3474        |                                                   |            |      | 4        | 534.3474 | 0.99457                                 | 0.99819 | -0.05  | -0.08    | 0.59   | 0.21                  | 0.17     | 0.25    | 0.37049 | 0.84063 | -0.29                      | -0.21   | -0.18  | -0.05  | -0.16    | -0.50                 | -0.68  | -0.68  | -0.68 |       |   |   |   |   |
| HILICneg_534.3485_0.52 | HILIC | pos  | 0.52       | 534.3485        |                                                   |            |      | 4        | 534.3485 | 0.55983                                 | 0.80920 | 0.15   | 0.07     | 0.45   | 0.44                  | 0.45     | 0.43    | 0.34582 | 0.82891 | -0.31                      | -0.19   | -0.19  | -0.21  | -0.12    | -0.57                 | -0.55  | -0.55  | -0.55 |       |   |   |   |   |
| RPpos_534.3533_10.48   | RP    | pos  | 10.48      | 534.3533        |                                                   |            |      | 4        | 534.3533 | 0.31590                                 | 0.64333 | -0.22  | 0.15     | -0.12  | -0.11                 | 0.17     | -0.38   | 0.78845 | 0.96713 | -0.02                      | -0.01   | -0.09  | 0.06   | 0.21     | 0.22                  | -0.50  | -0.50  | -0.50 |       |   |   |   |   |
| RPpos_534.386_14.09    | RP    | pos  | 14.09      | 534.3860        |                                                   |            |      | 4        | 534.3860 | 0.38003                                 | 0.69433 | -0.11  | 0.22     | -0.23  | 0.11                  | -0.12    | 0.56    | 0.02767 | 0.34840 | -0.30                      | -0.36   | -0.23  | -0.08  | -0.15    | -0.43                 | -0.30  | -0.30  | -0.30 |       |   |   |   |   |
| HILICneg_534.3985_0.92 | HILIC | neg  | 0.92       | 534.3985        |                                                   |            |      | 4        | 534.3985 | 0.23557                                 | 0.57501 | -0.28  | -0.36    | -0.26  | -0.14                 | -0.28    | -0.17   | 0.25755 | 0.77283 | -0.29                      | -0.34   | -0.25  | -0.21  | -0.16    | -0.30                 | 0.02   | 0.02   | 0.02  |       |   |   |   |   |
| HILICneg_534.4047_0.53 | HILIC | neg  | 0.53       | 534.4047        |                                                   |            |      | 4        | 534.4047 | 0.41144                                 | 0.66565 | 0.34   | -0.23    | 0.74   | 0.74                  | 0.33     | 0.12    | 0.94898 | 0.99197 | -0.04                      | -0.05   | 0.10   | -0.14  | -0.14    | -0.20                 | 0.21   | 0.21   | 0.21  |       |   |   |   |   |
| RPpos_535.10529_11.194 | RP    | pos  | 11.194     | 535.1053        |                                                   |            |      | 4        | 535.1053 | 0.85480                                 | 0.94564 | 0.06   | 0.12     | 0.58   | 0.57                  | -0.76    | -0.47   | 0.63027 | 0.93537 | -0.11                      | -0.13   | -0.28  | -0.37  | -0.12    | 0.08                  | 0.10   | 0.10   | 0.10  |       |   |   |   |   |
| HILICneg_535.1527_2.57 | HILIC | neg  | 2.57       | 535.1527        |                                                   |            |      | 4        | 535.1527 | 0.05438                                 | 0.35528 | -0.34  | -0.17    | -0.15  | -0.32                 | -0.43    | 0.25    | 0.58562 | 0.92503 | -0.31                      | 0.09    | 0.28   | -0.52  | -0.50    | -0.53                 | 0.32   | 0.32   | 0.32  |       |   |   |   |   |
| HILICneg_535.1998_0.49 | HILIC | neg  | 0.49       | 535.1998        |                                                   |            |      | 4        | 535.1998 | 0.19270                                 | 0.53805 | 0.38   | -0.24    | 0.54   | 0.35                  | 1.05     | -0.41   | 0.00042 | 0.03281 | 2.18                       | 0.31    | 2.24   | 3.48   | 2.57     | 1.88                  | 0.45   | 0.45   | 0.45  |       |   |   |   |   |
| RPneg_535.21124_6.228  | RP    | neg  | 6.228      | 535.2112        |                                                   |            |      | 4        | 535.2112 | 0.10243                                 | 0.43521 | -0.25  | -0.13    | 0.23   | -0.20                 | -0.39    | 0.31    | 0.72831 | 0.95686 | -0.22                      | -0.41   | -0.21  | -0.32  | 0.06     | 0.50                  | -0.39  | -0.39  | -0.39 |       |   |   |   |   |
| HILICneg_535.2133_0.44 | HILIC | pos  | 0.44       | 535.2133        |                                                   |            |      | 4        | 535.2133 | 0.72190                                 | 0.88633 | -0.05  | -0.02    | 0.68   | -0.06                 | 0.38     | 0.10    | 0.14844 | 0.65219 | 0.19                       | 0.52    | 0.27   | 0.10   | 0.62     | -0.19                 | -0.41  | -0.41  | -0.41 |       |   |   |   |   |
| RPpos_535.2137_5.97    | RP    | pos  | 5.97       | 535.2137        |                                                   |            |      | 4        | 535.2137 | 0.80952                                 | 0.92703 | -0.05  | 0.03     | 0.67   | -0.15                 | 0.63     | 0.49    | 0.32656 | 0.81898 | -0.02                      | 0.42    | 0.25   | -0.18  | 0.16     | -0.30                 | -0.24  | -0.24  | -0.24 |       |   |   |   |   |
| RPneg_535.21594_6.054  | RP    | neg  | 6.054      | 535.2159        |                                                   |            |      | 4        | 535.2159 | 0.75082                                 | 0.90077 | -0.01  | -0.01    | 0.52   | 0.06                  | -0.13    | -0.14   | 0.87656 | 0.98219 | 0.05                       | 0.18    | 1.29   | -0.26  | -0.16    | -0.03                 | -0.07  | -0.09  | -0.09 |       |   |   |   |   |
| RPpos_535.222_9.99     | RP    | pos  | 9.99       | 535.2220        |                                                   |            |      | 4        | 535.2220 | 0.69235                                 | 0.87634 | 0.07   | 0.14     | 0.18   | 0.08                  | 0.23     | 0.03    | 0.94286 | 0.99197 | 0.09                       | 0.01    | 0.10   | 0.04   | 0.13     | 0.09                  | 0.14   | 0.14   | 0.14  |       |   |   |   |   |
| HILICpos_535.2249_5.7  | HILIC | pos  | 5.7        | 535.2249        |                                                   |            |      | 4        | 535.2249 | 0.89641                                 | 0.96218 | -0.01  | 0.04     | -0.05  | 0.07                  | 0.06     | -0.06   | 0.88451 | 0.98281 | -0.03                      | -0.07   | 0.00   | 0.05   | -0.07    | -0.07                 | -0.10  | -0.10  | -0.10 |       |   |   |   |   |
| RPpos_535.26_9.17      | RP    | pos  | 9.17       | 535.2600        | adduct of chenodeoxycholic acid glycine conjugate |            |      | 4        | 535.2600 | 0.00016                                 | 0.02394 | 0.70   | 0.05     | 1.09   | 0.76                  | 0.99     | 0.88    | 0.00001 | 0.00215 | 0.42                       | -0.22   | 0.68   | 0.78   | 0.36     | 0.43                  | -0.41  | -0.41  | -0.41 |       |   |   |   |   |
| RPpos_535.2603_9.31    | RP    | pos  | 9.31       | 535.2603        |                                                   |            |      | 4        | 535.2603 | 0.00017                                 | 0.02513 | 0.54   | 0.06     | 0.80   | 0.56                  | 0.78     | 1.00    | 0.21801 | 0.73497 | 0.49                       | -0.27   | 0.65   | 0.82   | 0.56     | 0.69                  | -0.44  | -0.44  | -0.44 |       |   |   |   |   |
| RPpos_535.2877_8.71    | RP    | pos  | 8.71       | 535.2877        |                                                   |            |      | 4        |          |                                         |         |        |          |        |                       |          |         |         |         |                            |         |        |        |          |                       |        |        |       |       |   |   |   |   |



| Feature_ID              | Mode  | Ionization | Average_Rt.min. | Average_Mz | Metabolite | MSMS | ID_Level | HMDB_ID | IV-Alcohol self-administration (IV-ASA) |         |         |          |       |       |                       |       |      |         |         |         |       |       |       | IV-Alcohol clamp (IV-AC)   |       |       |          |   |   |         |                       |   |   |   |   |       |   |   |   |         |   |   |   |
|-------------------------|-------|------------|-----------------|------------|------------|------|----------|---------|-----------------------------------------|---------|---------|----------|-------|-------|-----------------------|-------|------|---------|---------|---------|-------|-------|-------|----------------------------|-------|-------|----------|---|---|---------|-----------------------|---|---|---|---|-------|---|---|---|---------|---|---|---|
|                         |       |            |                 |            |            |      |          |         | Area Under the Curve (AUC)              |         |         | Baseline |       |       | IV-Ghrelin or Placebo |       |      |         |         | BrAC=0  |       |       |       | Area Under the Curve (AUC) |       |       | Baseline |   |   | Post-LD | IV-Ghrelin or Placebo |   |   |   |   | IV-AC |   |   |   | Post-AC |   |   |   |
|                         |       |            |                 |            |            |      |          |         | p                                       | q       | d       | d        | d     | d     | d                     | d     | d    | d       | d       | d       | d     | d     | d     | d                          | d     | d     | d        | d | d | d       | d                     | d | d | d | d | d     | d | d | d | d       | d | d | d |
| RPpos_542.3165_5.97     | RP    | pos        | 5.97            | 542.3165   |            |      | 4        |         | 0.43734                                 | 0.73514 | 0.17    | 0.27     | 0.63  | 0.44  | 0.21                  | 0.35  |      | 0.71123 | 0.95299 | 0.13    | 0.26  | 0.89  | -0.47 | 0.75                       | -0.28 | -0.58 |          |   |   |         |                       |   |   |   |   |       |   |   |   |         |   |   |   |
| HILICpos_542.3173_0.85  | HILIC | pos        | 0.85            | 542.3173   |            |      | 4        |         | 0.21155                                 | 0.55434 | -0.02   | -0.05    | 0.38  | -0.12 | 0.28                  | -0.08 |      | 0.32579 | 0.81856 | 0.11    | 0.08  | 0.18  | 0.17  | 0.19                       | 0.19  | -0.02 | -0.15    |   |   |         |                       |   |   |   |   |       |   |   |   |         |   |   |   |
| RPpos_542.3181_10.49    | RP    | pos        | 10.49           | 542.3181   |            |      | 4        |         | 0.92188                                 | 0.97180 | -0.07   | -0.41    | 0.65  | 0.29  | 0.01                  | 0.04  |      | 0.31735 | 0.81359 | -0.19   | -0.23 | 0.05  | -0.09 | -0.08                      | -0.04 | -0.43 |          |   |   |         |                       |   |   |   |   |       |   |   |   |         |   |   |   |
| RPpos_542.3217_11.08    | RP    | pos        | 11.08           | 542.3217   |            |      | 4        |         | 0.90371                                 | 0.96453 | -0.05   | -0.28    | -0.02 | -0.05 | 0.60                  | -0.44 |      | 0.84586 | 0.97710 | -0.02   | -0.31 | 0.19  | 0.01  | -0.27                      | 0.07  | -0.19 |          |   |   |         |                       |   |   |   |   |       |   |   |   |         |   |   |   |
| RPpos_542.322_11.52     | RP    | pos        | 11.52           | 542.3220   |            |      | 4        |         | 0.03202                                 | 0.20964 | -0.32   | -0.06    | -0.23 | -0.22 | -0.03                 | -0.37 |      | 0.87844 | 0.96240 | 0.01    | -0.17 | 0.18  | 0.10  | -0.22                      | 0.17  | -0.09 |          |   |   |         |                       |   |   |   |   |       |   |   |   |         |   |   |   |
| RPpos_542.3223_10.25    | RP    | pos        | 10.25           | 542.3223   |            |      | 4        |         | 0.03739                                 | 0.31416 | -0.21   | -0.24    | -0.16 | -0.16 | -0.08                 | -0.39 |      | 0.47410 | 0.89377 | 0.10    | 0.13  | 0.18  | 0.13  | 0.18                       | 0.18  | 0.18  |          |   |   |         |                       |   |   |   |   |       |   |   |   |         |   |   |   |
| HILICpos_542.3224_10.12 | HILIC | pos        | 10.12           | 542.3224   |            |      | 4        |         | 0.01137                                 | 0.20565 | -0.43   | -0.16    | -0.12 | -0.21 | -0.23                 | -0.72 |      | 0.41916 | 0.86713 | 0.15    | 0.09  | 0.22  | 0.12  | 0.22                       | 0.17  | -0.10 |          |   |   |         |                       |   |   |   |   |       |   |   |   |         |   |   |   |
| HILICpos_542.3224_1.2   | HILIC | pos        | 1.2             | 542.3224   |            |      | 4        |         | 0.16728                                 | 0.51243 | -0.25   | -0.05    | -0.02 | -0.15 | -0.04                 | -0.33 |      | 0.95279 | 0.99379 | 0.03    | 0.05  | 0.14  | 0.00  | 0.08                       | 0.13  | -0.09 |          |   |   |         |                       |   |   |   |   |       |   |   |   |         |   |   |   |
| HILICpos_542.3227_1.1   | HILIC | pos        | 1.1             | 542.3227   |            |      | 4        |         | 0.03133                                 | 0.29782 | -0.29   | 0.03     | -0.02 | -0.13 | -0.09                 | -0.44 |      | 0.68991 | 0.94980 | 0.13    | 0.03  | 0.18  | 0.25  | 0.23                       | 0.12  | -0.09 |          |   |   |         |                       |   |   |   |   |       |   |   |   |         |   |   |   |
| RPpos_542.3248_9.83     | RP    | pos        | 9.83            | 542.3248   |            |      | 4        |         | 0.21783                                 | 0.55959 | -0.21   | -0.03    | -0.04 | -0.11 | -0.02                 | -0.34 |      | 0.97051 | 0.99673 | 0.02    | 0.06  | 0.06  | 0.08  | 0.09                       | 0.09  | -0.13 |          |   |   |         |                       |   |   |   |   |       |   |   |   |         |   |   |   |
| RPneg_542.33698_10.832  | RP    | neg        | 10.832          | 542.3370   |            |      | 4        |         | 0.01806                                 | 0.24514 | -0.56   | -0.06    | -0.31 | -0.28 | -0.59                 | -0.31 |      | 0.10035 | 0.57208 | -0.21   | 0.21  | -0.13 | -0.09 | -0.27                      | -0.03 | -0.40 |          |   |   |         |                       |   |   |   |   |       |   |   |   |         |   |   |   |
| HILICpos_542.3892_0.4   | HILIC | pos        | 0.4             | 542.3892   |            |      | 4        |         | 0.71398                                 | 0.88348 | -0.08   | 0.47     | 0.20  | -0.16 | 0.22                  | -0.01 |      | 0.53365 | 0.91313 | -0.08   | -0.11 | 0.03  | -0.01 | 0.02                       | -0.59 | 0.25  |          |   |   |         |                       |   |   |   |   |       |   |   |   |         |   |   |   |
| RPpos_542.6534_10.49    | RP    | pos        | 10.49           | 542.6534   |            |      | 4        |         | 0.81194                                 | 0.92813 | -0.07   | -0.06    | 0.62  | -0.04 | -0.02                 | 0.51  |      | 0.44258 | 0.87946 | -0.20   | -0.20 | 0.02  | -0.12 | -0.03                      | -0.54 | -0.30 |          |   |   |         |                       |   |   |   |   |       |   |   |   |         |   |   |   |
| HILICpos_542.7303_2.97  | HILIC | pos        | 2.97            | 542.7303   |            |      | 4        |         | 0.15937                                 | 0.50296 | -0.43   | -0.05    | 0.56  | -0.17 | -0.26                 | 0.99  |      | 0.65574 | 0.94036 | -0.15   | -0.15 | 0.25  | 1.02  | 0.14                       | -0.08 | -0.37 |          |   |   |         |                       |   |   |   |   |       |   |   |   |         |   |   |   |
| RPpos_542.9866_10.49    | RP    | pos        | 10.49           | 542.9866   |            |      | 4        |         | 0.99883                                 | 0.99953 | -0.05   | -0.03    | 0.67  | -0.13 | 0.03                  | 0.89  |      | 0.77593 | 0.96495 | -0.10   | -0.14 | 0.00  | 0.07  | 0.25                       | -0.32 | -0.50 |          |   |   |         |                       |   |   |   |   |       |   |   |   |         |   |   |   |
| HILICneg_543.0156_5.41  | HILIC | neg        | 5.41            | 543.0156   |            |      | 4        |         | 0.23852                                 | 0.58012 | 0.34    | 0.55     | 0.50  | 0.26  | 0.38                  | 0.72  |      | 0.12021 | 0.60729 | 0.08    | -0.23 | -0.03 | 0.28  | 0.23                       | 0.24  | -0.56 |          |   |   |         |                       |   |   |   |   |       |   |   |   |         |   |   |   |
| RPneg_543.13641_8.094   | RP    | neg        | 8.094           | 543.1364   |            |      | 4        |         | 0.09905                                 | 0.31824 | 0.28    | 0.11     | 0.28  | 0.37  | 0.57                  | 0.36  |      | 0.01486 | 0.25972 | 0.11    | -0.03 | 0.00  | -0.06 | 0.26                       | 0.33  | 0.00  |          |   |   |         |                       |   |   |   |   |       |   |   |   |         |   |   |   |
| RPneg_543.1535_10.848   | RP    | neg        | 10.848          | 543.1535   |            |      | 4        |         | 0.15979                                 | 0.50328 | 0.24    | 0.02     | 0.11  | 0.01  | 0.98                  | 0.03  |      | 0.36989 | 0.84060 | 0.24    | 0.26  | 0.42  | 0.13  | 0.43                       | 0.31  | 0.12  |          |   |   |         |                       |   |   |   |   |       |   |   |   |         |   |   |   |
| RPneg_543.15802_7.503   | RP    | neg        | 7.503           | 543.1580   |            |      | 4        |         | 0.02003                                 | 0.25736 | 0.54    | 0.01     | 0.62  | 0.20  | -0.01                 | 0.60  |      | 0.00306 | 0.03028 | 0.45    | -0.13 | 0.12  | 0.40  | 0.67                       | 0.87  | 0.23  |          |   |   |         |                       |   |   |   |   |       |   |   |   |         |   |   |   |
| HILICneg_543.1685_6.99  | HILIC | neg        | 6.99            | 543.1685   |            |      | 4        |         | 0.77351                                 | 0.91078 | -0.10   | 0.31     | 0.48  | -0.03 | -0.05                 | -0.61 |      | 0.05416 | 0.46107 | 0.21    | 0.55  | 0.43  | 0.60  | 0.03                       | 0.05  | -0.24 |          |   |   |         |                       |   |   |   |   |       |   |   |   |         |   |   |   |
| RPpos_543.2151_6.48     | RP    | pos        | 6.48            | 543.2151   |            |      | 4        |         | 0.03150                                 | 0.29799 | -0.38   | -0.04    | 0.24  | -0.31 | -0.58                 | 0.34  |      | 0.20661 | 0.72331 | 0.34    | 0.15  | 0.25  | -0.23 | 0.66                       | 0.61  | -0.09 |          |   |   |         |                       |   |   |   |   |       |   |   |   |         |   |   |   |
| HILICpos_543.2792_4.86  | HILIC | pos        | 4.86            | 543.2792   |            |      | 4        |         | 0.45331                                 | 0.74626 | 0.19    | 0.08     | 0.44  | 0.19  | 0.21                  | 0.68  |      | 0.38105 | 0.84769 | -0.19   | 0.00  | -0.40 | -0.30 | 0.02                       | 0.19  | -0.16 |          |   |   |         |                       |   |   |   |   |       |   |   |   |         |   |   |   |
| RPpos_543.2794_7.18     | RP    | pos        | 7.18            | 543.2794   |            |      | 4        |         | 0.67469                                 | 0.86434 | 0.19    | 0.01     | 0.09  | 0.30  | 0.79                  | 0.24  |      | 0.45504 | 0.88402 | 0.43    | -0.05 | 0.06  | 0.19  | 0.51                       | 0.85  | 0.29  |          |   |   |         |                       |   |   |   |   |       |   |   |   |         |   |   |   |
| RPneg_543.28046_6.753   | RP    | neg        | 6.753           | 543.2805   |            |      | 4        |         | 0.94941                                 | 0.98123 | 0.04    | -0.06    | -0.10 | 0.05  | 0.57                  | 0.24  |      | 0.66336 | 0.94292 | 0.10    | -0.10 | -0.01 | -0.04 | 0.15                       | 0.27  | 0.16  |          |   |   |         |                       |   |   |   |   |       |   |   |   |         |   |   |   |
| HILICneg_543.3183_0.38  | HILIC | neg        | 0.38            | 543.3183   |            |      | 4        |         | 0.74745                                 | 0.89947 | 0.15    | 0.29     | 0.25  | 0.08  | 0.61                  | -0.16 |      | 0.96032 | 0.99553 | 0.00    | 0.00  | 0.22  | 0.04  | -0.24                      | -0.24 | 0.26  |          |   |   |         |                       |   |   |   |   |       |   |   |   |         |   |   |   |
| RPpos_543.3365_6.43     | RP    | pos        | 6.43            | 543.3365   |            |      | 4        |         | 0.81912                                 | 0.93123 | -0.07   | 0.31     | 0.27  | 0.37  | -0.09                 | 0.49  |      | 0.70630 | 0.95248 | -0.17   | -0.07 | 0.02  | 0.05  | 0.08                       | 0.94  | -0.32 |          |   |   |         |                       |   |   |   |   |       |   |   |   |         |   |   |   |
| RPpos_543.3447_10.87    | RP    | pos        | 10.87           | 543.3447   |            |      | 4        |         | 0.02921                                 | 0.29029 | -0.41   | 0.04     | -0.10 | -0.30 | -0.25                 | -0.39 |      | 0.39935 | 0.85782 | 0.00    | 0.02  | 0.00  | -0.07 | 0.11                       | 0.01  | -0.11 |          |   |   |         |                       |   |   |   |   |       |   |   |   |         |   |   |   |
| RPpos_543.3448_10.76    | RP    | pos        | 10.76           | 543.3448   |            |      | 4        |         | 0.00922                                 | 0.18800 | -0.38   | -0.03    | -0.20 | -0.38 | -0.20                 | -0.44 |      | 0.50799 | 0.90389 | 0.14    | 0.27  | 0.12  | 0.15  | 0.40                       | -0.03 | -0.14 |          |   |   |         |                       |   |   |   |   |       |   |   |   |         |   |   |   |
| RPpos_543.3746_14.09    | RP    | pos        | 14.09           | 543.3746   |            |      | 4        |         | 0.61467                                 | 0.83582 | 0.05    | 0.77     | 0.02  | 0.64  | -0.28                 | -0.05 |      | 0.03628 | 0.38855 | -0.53   | -0.41 | -0.32 | 0.62  | -0.47                      | -0.57 | -0.31 |          |   |   |         |                       |   |   |   |   |       |   |   |   |         |   |   |   |
| RPpos_543.4434_15.4     | RP    | pos        | 15.4            | 543.4434   |            |      | 4        |         | 0.79872                                 | 0.92222 | -0.03   | 0.53     | -0.34 | 0.61  | -0.25                 | 0.30  |      | 0.03701 | 0.39245 | -0.32   | -0.44 | -0.10 | -0.03 | 0.55                       | -0.26 | -0.27 |          |   |   |         |                       |   |   |   |   |       |   |   |   |         |   |   |   |
| RPneg_544.1062_7.43     | RP    | neg        | 7.43            | 544.1062   |            |      | 4        |         | 0.82075                                 | 0.93200 | 0.02    | 0.04     | 0.12  | 0.11  | 0.37                  | 0.05  |      | 0.05348 | 0.45841 | 0.07    | -0.02 | -0.02 | 0.06  | 0.21                       | 0.17  | -0.04 |          |   |   |         |                       |   |   |   |   |       |   |   |   |         |   |   |   |
| RPneg_544.25787_8.023   | RP    | neg        | 8.023           | 544.2579   |            |      | 4        |         | 0.73147                                 | 0.89098 | 0.10    | -0.21    | 0.22  | 0.20  | 0.21                  | -0.07 |      | 0.12741 | 0.61879 | -0.25   | -0.03 | 0.26  | 0.31  | 0.34                       | 0.26  | 0.04  |          |   |   |         |                       |   |   |   |   |       |   |   |   |         |   |   |   |
| HILICneg_544.2645_2.05  | HILIC | neg        | 2.05            | 544.2645   |            |      | 4        |         | 0.31780                                 | 0.64483 | -0.10   | -0.14    | 0.28  | 0.15  | -0.11                 | -0.15 |      | 0.97238 | 0.99673 | -0.02   | -0.14 | -0.05 | 0.01  | 0.34                       | -0.02 | -0.26 |          |   |   |         |                       |   |   |   |   |       |   |   |   |         |   |   |   |
| RPneg_544.26471_10.276  | RP    | neg        | 10.276          | 544.2647   |            |      | 4        |         | 0.64906                                 | 0.85156 | 0.09    | 0.02     | 0.61  | 0.32  | 0.16                  | 0.25  |      | 0.67500 | 0.94679 | -0.15   | -0.41 | -0.27 | 0.05  | -0.07                      | -0.07 | -0.26 |          |   |   |         |                       |   |   |   |   |       |   |   |   |         |   |   |   |
| RPneg_544.26526_10.143  | RP    | neg        | 10.143          | 544.2653   |            |      | 4        |         | 0.49561                                 | 0.77379 | -0.19   | -0.21    | 0.48  | 0.07  | -0.02                 | 0.11  |      | 0.97829 | 0.99726 | -0.01   | -0.19 | -0.16 | 0.11  | 0.31                       | 0.01  | -0.23 |          |   |   |         |                       |   |   |   |   |       |   |   |   |         |   |   |   |
| RPpos_544.2961_6.08     | RP    | pos        | 6.08            | 544.2961   |            |      | 4        |         | 0.01414                                 | 0.22520 | -0.65   | -0.26    | -0.62 | -0.06 | -0.42                 | -0.43 |      | 0.18732 | 0.70226 | -0.06   | -0.37 | -0.16 | 0.25  | -0.22                      | 0.21  | 0.06  |          |   |   |         |                       |   |   |   |   |       |   |   |   |         |   |   |   |
| RPpos_544.3087_7.06     | RP    | pos        | 7.06            | 544.3087   |            |      | 4        |         | no autoMSMS                             | 0.00013 | 0.02071 | 1.18     | 0.16  | 0.95  | 1.22                  | 2.21  | 0.54 |         | 0.00001 | 0.00290 | 0.71  | -0.29 | -0.22 | 0.27                       | 1.38  | 1.54  | 1.72     |   |   |         |                       |   |   |   |   |       |   |   |   |         |   |   |   |
| RPneg_544.31653_10.686  | RP    | neg        | 10.686          | 544.3165   |            |      | 4        |         | 0.01910                                 | 0.25172 | -0.58   | -0.12    | -0.35 | -0.53 | -0.44                 | -0.19 |      | 0.37048 | 0.84063 | -0.08   | 0.10  | -0.07 | -0.03 | -0.04                      | -0.07 | -0.25 |          |   |   |         |                       |   |   |   |   |       |   |   |   |         |   |   |   |
| RPneg_544.3175_10.62    | RP    | neg        | 10.62           | 544.3175   |            |      | 4        |         | 0.20972                                 | 0.55269 | -0.29   | 0.08     | 0.22  | -0.34 | -0.32                 | -0.25 |      | 0.04524 | 0.42663 | -0.45   | -0.49 | -0.55 | -0.43 | -0.31                      | -0.33 | -0.30 |          |   |   |         |                       |   |   |   |   |       |   |   |   |         |   |   |   |
| RPpos_544.3372_11.52    | RP    | pos        | 11.52           | 544.3372   |            |      | 4        |         | 0.01717                                 | 0.24115 | -0.29   | -0.05    | -0.12 | -0.02 | 0.01                  | -0.57 |      | 0.72587 | 0.95609 | 0.18    | 0.18  | 0.27  | 0.14  | 0.42                       | 0.03  | -0.08 |          |   |   |         |                       |   |   |   |   |       |   |   |   |         |   |   |   |
| RPpos_544.3372_10.55    | RP    | pos        | 10.55           | 544.3372   |            |      | 4        |         | 0.00297                                 | 0.11229 | -0.56   | -0.02    | -0.18 | -0.47 | -0.46                 | -0.43 |      | 0.83062 | 0.97473 | 0.13    | 0.03  | 0.12  | 0.19  | 0.38                       | 0.02  | 0.04  |          |   |   |         |                       |   |   |   |   |       |   |   |   |         |   |   |   |
| HILICpos_544.3376_1.17  | HILIC | pos        | 1.17            | 544.3376   |            |      | 4        |         | 0.02013                                 | 0.25757 | -0.36   | 0.11     | -0.01 | -0.16 | -0.09                 | -0.59 |      | 0.81682 | 0.97222 | 0.19    | 0.21  | 0.09  | 0.18  | 0.29                       | 0.25  | -0.03 |          |   |   |         |                       |   |   |   |   |       |   |   |   |         |   |   |   |
| HILICpos_544.3381_1.05  | HILIC | pos        | 1.05            | 544.3381   |            |      | 4        |         | 0.00289                                 | 0.11067 | -0.29   | 0.03     | 0.03  |       |                       |       |      |         |         |         |       |       |       |                            |       |       |          |   |   |         |                       |   |   |   |   |       |   |   |   |         |   |   |   |

| Feature_ID             | Mode  | Ionization | Average_Rt.min. | Average_Mz | Metabolite | MSMS        | ID_Level | HMDB_ID | IV-Alcohol self-administration (IV-ASA) |           |       |        |       |       |                       |       |          |         | IV-Alcohol clamp (IV-AC) |       |       |       |                            |       |          |   |       |   |                       |   |  |  |                       |  |  |  |
|------------------------|-------|------------|-----------------|------------|------------|-------------|----------|---------|-----------------------------------------|-----------|-------|--------|-------|-------|-----------------------|-------|----------|---------|--------------------------|-------|-------|-------|----------------------------|-------|----------|---|-------|---|-----------------------|---|--|--|-----------------------|--|--|--|
|                        |       |            |                 |            |            |             |          |         | Area Under the Curve (AUC)              |           |       |        |       |       | IV-Ghrelin or Placebo |       |          |         | IV-Ghrelin or Placebo    |       |       |       | Area Under the Curve (AUC) |       |          |   |       |   | IV-Ghrelin or Placebo |   |  |  | IV-Ghrelin or Placebo |  |  |  |
|                        |       |            |                 |            |            |             |          |         | Baseline                                |           |       | IV-ASA |       |       | BrAC=0                |       | Baseline |         | Post-LD                  |       | IV-AC |       | BrAC=0                     |       | Baseline |   | IV-AC |   | BrAC=0                |   |  |  |                       |  |  |  |
|                        |       |            |                 |            |            |             |          |         | p                                       | q         | d     | d      | d     | d     | d                     | d     | d        | d       | p                        | q     | d     | d     | d                          | d     | d        | d | d     | d | d                     | d |  |  |                       |  |  |  |
| RPpos_547.1606_9.07    | RP    | pos        | 9.07            |            |            |             | 4        |         | 0.71593                                 | 0.88437   | -0.10 | 0.16   | -0.24 | -0.17 | 0.02                  | 0.62  | 0.45974  | 0.88511 | -0.11                    | -0.07 | -0.07 | -0.17 | 0.03                       | -0.18 | -0.25    |   |       |   |                       |   |  |  |                       |  |  |  |
| RPneg_547.18005_11.194 | RP    | neg        | 11.194          | 547.1801   |            |             | 4        |         | 0.05498                                 | 0.35643   | 0.80  | -0.21  | 0.63  | 1.13  | 1.78                  | -0.32 | 0.72545  | 0.95609 | -0.07                    | -0.23 | 0.33  | -0.31 | -0.03                      | -0.19 | 0.04     |   |       |   |                       |   |  |  |                       |  |  |  |
| HILICneg_547.2009_0.47 | HILIC | neg        | 0.47            | 547.2009   |            |             | 4        |         | 0.01285                                 | 0.21615   | 0.75  | 0.68   | 0.46  | 0.82  | 1.46                  | -0.22 | 0.39959  | 0.85796 | -0.12                    | -0.29 | -0.48 | -0.21 | 0.31                       | 0.35  | -0.27    |   |       |   |                       |   |  |  |                       |  |  |  |
| RPneg_547.22186_6.893  | RP    | neg        | 6.893           | 547.2219   |            |             | 4        |         | 0.08254                                 | 0.40756   | -0.15 | 0.12   | -0.01 | -0.15 | -0.08                 | -0.33 | 0.75118  | 0.96189 | 0.12                     | 0.12  | 0.07  | 0.10  | 0.12                       | 0.25  | 0.01     |   |       |   |                       |   |  |  |                       |  |  |  |
| RPneg_547.22345_9.174  | RP    | neg        | 9.174           | 547.2235   |            |             | 4        |         | 0.00873                                 | 0.05357   | 0.85  | 0.12   | 1.29  | 0.89  | 1.06                  | 0.87  | 0.00011  | 0.00162 | -0.45                    | -0.24 | 0.63  | 0.24  | 0.49                       | 0.50  | -0.43    |   |       |   |                       |   |  |  |                       |  |  |  |
| RPneg_547.23187_13.187 | RP    | neg        | 13.187          | 547.2319   |            |             | 4        |         | 0.46695                                 | 0.77425   | -0.20 | 0.37   | -0.39 | -0.11 | 0.31                  | -0.07 | 0.15094  | 0.65549 | -0.29                    | -0.30 | -0.21 | -0.30 | -0.42                      | 0.12  | -0.06    |   |       |   |                       |   |  |  |                       |  |  |  |
| RPpos_547.3038_8.75    | RP    | pos        | 8.75            | 547.3038   |            |             | 4        |         | 0.06108                                 | 0.36821   | 0.20  | 0.12   | 0.36  | 0.32  | 0.15                  | 0.03  | 0.44237  | 0.87946 | 0.08                     | -0.19 | 0.00  | 0.05  | 0.28                       | 0.14  | 0.04     |   |       |   |                       |   |  |  |                       |  |  |  |
| RPpos_547.304_8.58     | RP    | pos        | 8.58            | 547.3040   |            |             | 4        |         | 0.89568                                 | 0.96214   | 0.37  | -0.10  | 0.37  | 0.55  | 1.11                  | -0.01 | 0.45250  | 0.88300 | 0.18                     | 0.33  | 0.16  | -0.02 | 0.12                       | 0.11  | 0.24     |   |       |   |                       |   |  |  |                       |  |  |  |
| HILICpos_547.3051_2.94 | HILIC | pos        | 2.94            | 547.3051   |            |             | 4        |         | 0.02054                                 | 0.25924   | 0.64  | 0.28   | 1.05  | 0.68  | 1.31                  | -0.13 | 0.12425  | 0.61460 | 0.09                     | -0.02 | -0.02 | 0.21  | 0.19                       | 0.09  | 0.01     |   |       |   |                       |   |  |  |                       |  |  |  |
| RPpos_547.3179_10.18   | RP    | pos        | 10.18           | 547.3179   |            |             | 4        |         | 0.76300                                 | 0.90638   | 0.05  | 0.09   | 0.77  | 0.18  | 0.00                  | 0.82  | 0.29350  | 0.79704 | -0.16                    | -0.17 | -0.08 | -0.17 | -0.02                      | -0.31 | -0.25    |   |       |   |                       |   |  |  |                       |  |  |  |
| HILICpos_547.3184_0.44 | HILIC | pos        | 0.44            | 547.3184   |            |             | 4        |         | 0.81928                                 | 0.93123   | -0.06 | -0.01  | 0.54  | 0.06  | -0.06                 | 0.59  | 0.25995  | 0.77424 | -0.21                    | -0.18 | -0.14 | -0.25 | 0.02                       | -0.32 | -0.37    |   |       |   |                       |   |  |  |                       |  |  |  |
| RPpos_547.3329_6.98    | RP    | pos        | 6.98            | 547.3329   |            |             | 4        |         | 0.57204                                 | 0.81512   | -0.16 | -0.30  | 0.45  | -0.08 | -0.25                 | 0.39  | 0.85453  | 0.97834 | 0.02                     | 0.08  | 0.12  | 0.25  | 0.04                       | -0.59 | -0.14    |   |       |   |                       |   |  |  |                       |  |  |  |
| HILICpos_547.3464_0.53 | HILIC | pos        | 0.53            | 547.3464   |            |             | 4        |         | 0.34490                                 | 0.66623   | -0.28 | -0.30  | 1.01  | -0.36 | -0.36                 | 0.45  | 0.44091  | 0.87936 | -0.25                    | -0.14 | -0.15 | -0.25 | -0.02                      | -0.20 | -0.39    |   |       |   |                       |   |  |  |                       |  |  |  |
| RPpos_547.3486_7.8     | RP    | pos        | 7.8             | 547.3486   |            |             | 4        |         | 0.66953                                 | 0.86207   | -0.16 | -0.11  | 0.86  | -0.04 | -0.28                 | 1.02  | 0.69714  | 0.95104 | -0.02                    | -0.01 | 0.21  | 0.14  | 0.18                       | 0.16  | -0.38    |   |       |   |                       |   |  |  |                       |  |  |  |
| RPpos_547.3852_14.73   | RP    | pos        | 14.73           | 547.3852   |            |             | 4        |         | 0.63711                                 | 0.84668   | 0.03  | 0.61   | 0.02  | 0.34  | 0.01                  | 0.06  | 0.10280  | 0.57743 | -0.29                    | -0.31 | -0.12 | 0.14  | -0.22                      | -0.30 | -0.31    |   |       |   |                       |   |  |  |                       |  |  |  |
| HILICneg_547.4374_0.39 | HILIC | neg        | 0.39            | 547.4374   |            |             | 4        |         | 0.01485                                 | 0.22926   | 0.58  | 0.27   | 0.36  | 0.37  | 1.55                  | 0.24  | 0.52112  | 0.90888 | -0.18                    | -0.12 | -0.21 | -0.18 | -0.18                      | -0.08 | -0.18    |   |       |   |                       |   |  |  |                       |  |  |  |
| RPpos_547.4723_13.53   | RP    | pos        | 13.53           | 547.4723   |            |             | 4        |         | 0.51136                                 | 0.78316   | 0.27  | 0.30   | 0.55  | 0.24  | 0.73                  | -0.33 | 0.05179  | 0.45366 | -0.26                    | -0.42 | -0.35 | -0.16 | -0.36                      | -0.05 | -0.41    |   |       |   |                       |   |  |  |                       |  |  |  |
| RPpos_547.64_11        | RP    | pos        | 11              | 547.6400   |            |             | 4        |         | 0.83603                                 | 0.93846   | 0.01  | -0.38  | 0.82  | 0.06  | 0.06                  | 0.55  | 0.48400  | 0.89667 | -0.22                    | -0.29 | 0.17  | -0.22 | -0.48                      | -0.36 | 0.03     |   |       |   |                       |   |  |  |                       |  |  |  |
| RPpos_547.9719_10.99   | RP    | pos        | 10.99           | 547.9719   |            |             | 4        |         | 0.84755                                 | 0.54294   | 0.01  | -0.25  | 0.93  | 0.35  | -0.28                 | 0.49  | 0.41416  | 0.86469 | -0.25                    | -0.23 | -0.02 | -0.16 | -0.06                      | -0.34 | -0.10    |   |       |   |                       |   |  |  |                       |  |  |  |
| RPneg_548.23035_9.174  | RP    | neg        | 9.174           | 548.2304   |            |             | 4        |         | 0.00100                                 | 0.06441   | 0.86  | -0.12  | 1.24  | 0.94  | 1.30                  | 1.16  | 0.00000  | 0.00057 | 0.45                     | -0.24 | 0.65  | 0.87  | 0.41                       | 0.38  | -0.44    |   |       |   |                       |   |  |  |                       |  |  |  |
| RPneg_548.23071_8.191  | RP    | neg        | 8.191           | 548.2307   |            |             | 4        |         | 0.03262                                 | 0.30192   | 0.36  | 0.04   | 1.05  | 0.36  | 0.54                  | 0.36  | 0.35375  | 0.83300 | 0.14                     | -0.18 | 0.25  | 0.26  | 0.21                       | 0.15  | -0.32    |   |       |   |                       |   |  |  |                       |  |  |  |
| RPneg_548.23151_9.323  | RP    | neg        | 9.323           | 548.2315   |            |             | 4        |         | 0.00050                                 | 0.04175   | 0.58  | 0.12   | 0.72  | 0.63  | 0.88                  | 1.23  | 0.17989  | 0.69487 | 0.65                     | -0.28 | 0.86  | 0.96  | 0.76                       | 0.93  | -0.42    |   |       |   |                       |   |  |  |                       |  |  |  |
| RPneg_548.29724_10.767 | RP    | neg        | 10.767          | 548.2972   |            |             | 4        |         | 0.08350                                 | 0.40892   | -0.33 | 0.09   | -0.15 | -0.30 | -0.03                 | -0.39 | 0.04266  | 0.41676 | -0.21                    | -0.06 | -0.22 | -0.08 | -0.11                      | -0.33 | -0.43    |   |       |   |                       |   |  |  |                       |  |  |  |
| RPneg_548.29767_10.871 | RP    | neg        | 10.871          | 548.2977   |            |             | 4        |         | 0.17876                                 | 0.52425   | -0.36 | -0.19  | -0.01 | -0.14 | -0.08                 | -0.14 | 0.32623  | 0.81885 | -0.18                    | -0.23 | -0.07 | -0.12 | -0.16                      | -0.08 | -0.78    |   |       |   |                       |   |  |  |                       |  |  |  |
| RPpos_548.3058_10.99   | RP    | pos        | 10.99           | 548.3058   |            |             | 4        |         | 0.94970                                 | 0.98123   | -0.04 | -0.59  | 1.02  | 0.22  | -0.22                 | 0.63  | 0.45733  | 0.88446 | -0.04                    | -0.21 | -0.08 | -0.29 | -0.20                      | -0.42 | -0.09    |   |       |   |                       |   |  |  |                       |  |  |  |
| RPpos_548.3114_9.74    | RP    | pos        | 9.74            | 548.3114   |            |             | 4        |         | 0.59422                                 | 0.82615   | 0.15  | -0.14  | 0.84  | 0.34  | 0.31                  | 0.07  | 0.62725  | 0.93462 | -0.18                    | -0.48 | -0.07 | -0.23 | 0.21                       | -0.21 | -0.42    |   |       |   |                       |   |  |  |                       |  |  |  |
| RPpos_548.327_5.4      | RP    | pos        | 5.4             | 548.3270   |            |             | 4        |         | 0.28408                                 | 0.61773   | -0.26 | 0.48   | -0.10 | 0.04  | -0.21                 | -0.18 | 0.09046  | 0.55404 | -0.42                    | -0.34 | -0.32 | -0.89 | -0.68                      | 0.23  | -0.35    |   |       |   |                       |   |  |  |                       |  |  |  |
| RPpos_548.3458_6.56    | RP    | pos        | 6.56            | 548.3458   |            | no autoMSMS | 4        |         | 0.30678                                 | 0.63538   | 0.16  | 0.26   | 0.41  | 0.19  | 0.14                  | 0.61  | 0.00000  | 0.00000 | -0.05                    | -0.17 | -0.09 | -0.18 | 0.04                       | 0.15  | -0.07    |   |       |   |                       |   |  |  |                       |  |  |  |
| RPpos_548.3462_7.01    | RP    | pos        | 7.01            | 548.3462   |            |             | 4        |         | 0.25550                                 | 0.59376   | -0.33 | -0.18  | 0.83  | -0.31 | -0.40                 | 0.18  | 0.43550  | 0.87634 | -0.31                    | -0.21 | -0.07 | -0.24 | 0.04                       | -0.52 | -0.43    |   |       |   |                       |   |  |  |                       |  |  |  |
| HILICpos_548.3466_0.67 | HILIC | pos        | 0.67            | 548.3466   |            |             | 4        |         | 0.52481                                 | 0.79035   | 0.09  | 0.26   | 0.45  | 0.09  | 0.13                  | 0.72  | 0.41405  | 0.86469 | -0.02                    | -0.22 | 0.05  | 0.09  | 0.15                       | -0.02 | -0.35    |   |       |   |                       |   |  |  |                       |  |  |  |
| HILICpos_548.3469_0.48 | HILIC | pos        | 0.48            | 548.3469   |            |             | 4        |         | 0.22728                                 | 0.56902   | -0.34 | -0.26  | 0.85  | -0.35 | -0.38                 | 0.14  | 0.48585  | 0.89761 | -0.28                    | -0.23 | 0.04  | -0.22 | -0.01                      | -0.50 | -0.43    |   |       |   |                       |   |  |  |                       |  |  |  |
| RPpos_548.3641_6.09    | RP    | pos        | 6.09            | 548.3641   |            |             | 4        |         | 0.76657                                 | 0.90851   | -0.12 | -0.24  | 0.53  | -0.05 | -0.12                 | 0.42  | 0.33581  | 0.82340 | -0.31                    | -0.15 | -0.11 | -0.15 | -0.19                      | -0.65 | -0.59    |   |       |   |                       |   |  |  |                       |  |  |  |
| RPpos_548.3716_10.57   | RP    | pos        | 10.57           | 548.3716   |            |             | 4        |         | 0.00485                                 | 0.13839   | -0.50 | -0.15  | -0.34 | -0.36 | -0.08                 | -0.47 | 0.52181  | 0.90888 | -0.01                    | 0.01  | 0.03  | 0.06  | 0.11                       | -0.04 | -0.18    |   |       |   |                       |   |  |  |                       |  |  |  |
| HILICpos_548.3716_1.17 | HILIC | pos        | 1.17            | 548.3716   |            |             | 4        |         | 0.02205                                 | 0.26503   | -0.47 | -0.11  | 0.01  | -0.26 | -0.25                 | -0.30 | 0.51145  | 0.90558 | 0.44                     | -0.16 | 0.76  | 0.69  | -0.05                      | 0.26  | 0.23     |   |       |   |                       |   |  |  |                       |  |  |  |
| RPpos_548.4656_11.95   | RP    | pos        | 11.95           | 548.4656   |            |             | 4        |         | 0.17093                                 | 0.51604   | 0.08  | 0.15   | 0.19  | 0.21  | 0.27                  | 0.25  | 0.77139  | 0.96458 | 0.07                     | 0.30  | -0.10 | 0.16  | 0.26                       | -0.02 | -0.06    |   |       |   |                       |   |  |  |                       |  |  |  |
| RPpos_548.4689_11.84   | RP    | pos        | 11.84           | 548.4689   |            |             | 4        |         | 0.19268                                 | 0.53804   | 0.09  | 0.17   | 0.14  | 0.21  | 0.24                  | 0.13  | 0.75895  | 0.96233 | 0.09                     | 0.09  | -0.03 | -0.04 | 0.50                       | 0.07  | -0.11    |   |       |   |                       |   |  |  |                       |  |  |  |
| HILICneg_548.4689_3.06 | HILIC | neg        | 3.06            | 548.4689   |            |             | 4        |         | 0.28828                                 | 0.62173   | -0.33 | 0.08   | 0.43  | -0.15 | -0.23                 | 1.54  | 0.63827  | 0.93638 | -0.16                    | -0.27 | 0.06  | 0.99  | 0.13                       | -0.01 | -0.39    |   |       |   |                       |   |  |  |                       |  |  |  |
| RPpos_548.8129_10.55   | RP    | pos        | 10.55           | 548.8129   |            |             | 4        |         | 0.00748                                 | 0.16959   | -0.40 | -0.04  | -0.12 | -0.34 | -0.17                 | -0.36 | 0.57581  | 0.92304 | 0.17                     | 0.23  | 0.21  | 0.16  | 0.14                       | 0.24  | -0.05    |   |       |   |                       |   |  |  |                       |  |  |  |
| HILICpos_548.8485_0.73 | HILIC | pos        | 0.73            | 548.8485   |            |             | 4        |         | 0.29694                                 | 0.62784   | 0.16  | 0.31   | 0.40  | 0.09  | 0.29                  | 0.63  | 0.01774  | 0.28477 | -0.03                    | -0.15 | -0.01 | -0.16 | 0.02                       | 0.13  | -0.05    |   |       |   |                       |   |  |  |                       |  |  |  |
| RPneg_549.1386_9.076   | RP    | neg        | 9.076           | 549.1386   |            |             | 4        |         | 0.12014                                 | 0.45565   | -0.19 | 0.09   | -0.21 | -0.13 | -0.05                 | -0.07 | 0.44923  | 0.88146 | 0.09                     | 0.61  | 0.12  | -0.29 | 0.06                       | 0.47  | -0.35    |   |       |   |                       |   |  |  |                       |  |  |  |
| HILICpos_549.1555_3.87 | HILIC | pos        | 3.87            | 549.1555   |            |             | 4        |         | 0.19602                                 | 0.54092   | 0.31  | 0.02   | 1.99  | 0.09  | -0.01                 | -0.47 | 0.00030  | 0.02581 | 2.24                     | 0.77  | 3.17  | 2.87  | 1.76                       | 0.93  | -0.03    |   |       |   |                       |   |  |  |                       |  |  |  |
| RPneg_549.1795_10.002  | RP    | neg        | 10.002          | 549.1795   |            |             | 4        |         | 0.81519                                 | 0.92958   | 0.09  | 0.14   | 0.20  | 0.08  | 0.25                  | 0.07  | 0.99652  | 0.99953 | 0.10                     | 0.03  | 0.09  | 0.05  | 0.12                       | 0.15  | 0.12     |   |       |   |                       |   |  |  |                       |  |  |  |
| HILICneg_549.2163_0.48 | HILIC | neg        | 0.48            | 549.2163   |            |             | 4        |         | 2.73E-07                                | 0.00044   | 2.42  | 0.39   | 3.39  | 2.27  | 3.73                  | -0.34 | 0.00000  | 0.00019 | 1.34                     | -0.48 | 1.22  | 1.76  | 1.83                       | 2.24  | -0.59    |   |       |   |                       |   |  |  |                       |  |  |  |
| HILICneg_549.2663_0.44 | HILIC | neg        | 0.44            | 549.2663   |            |             | 4        |         | 0.83597                                 | 0.93842   | 0.04  | 0.52   | 0.15  | -0.04 | 0.20                  | 0.27  | 0.12066  | 0.60803 | -0.36                    | -0.43 | -0.36 | -0.15 | -0.32                      | -0.26 | -0.41    |   |       |   |                       |   |  |  |                       |  |  |  |
| RPpos_549.2895_11      | RP    | pos        | 11              | 549.2895   |            |             | 4        |         | 0.30827                                 | 0.63689   | 0.14  | -0.27  | 1.28  | 0.31  | -0.04                 | 0.02  | 0.09112  | 0.55604 | -0.33                    | -0.12 | -0.25 | -0.45 | -0.13                      | -0.41 | -0.39    |   |       |   |                       |   |  |  |                       |  |  |  |
| RPneg_549.34424_11.062 | RP    | neg        | 11.062          | 549.3442   |            |             | 4        |         | 0.13647                                 | 0.47649   | -0.37 | -0.32  | -0.27 | -0.36 | -0.27                 | -0.32 | 0.02884  | 0.35422 | 0.99                     | 1.18  | 1.19  | 0.74  | 0.85                       | 1.38  | -0.39    |   |       |   |                       |   |  |  |                       |  |  |  |
| RPpos_549.4510_11.52   | RP    | pos        | 11.52           | 549.4510   |            |             | 4        |         | 0.22376                                 | 0.56631   | 0.16  | -0.11  | -0.01 | 0.39  | 0.55                  | 0.34  | 0.90870  | 0.98689 | 0.05                     | 0.22  | 0.14  | 0.11  | 0.03                       | -0.21 | -0.18    |   |       |   |                       |   |  |  |                       |  |  |  |
| HILICneg_549.4537_0.39 | HILIC | neg        | 0.39            | 549.4537   |            |             | 4        |         | 0.02259                                 | 0.26714   | 0.87  | 0.57   | 0.49  | 0.90  | 1.58                  | 0.40  | 0.95405  | 0.99401 | -0.01                    | 0.17  | -0.09 | 0.09  | 0.00                       | 0.01  | -0.01    |   |       |   |                       |   |  |  |                       |  |  |  |
| RPpos_549.487_14.21    | RP    | pos        | 14.21           | 549.4870   |            |             | 4        |         | 0.53743                                 | 0.79728</ |       |        |       |       |                       |       |          |         |                          |       |       |       |                            |       |          |   |       |   |                       |   |  |  |                       |  |  |  |



| Feature_ID             | Mode  | Ionization | Average_Rt.min. | Average_Mz | Metabolite | MSMS | ID_Level | HMDB_ID | IV-Alcohol self-administration (IV-ASA) |         |        |       |        |       |                       |       |            |         |         |       | IV-Alcohol clamp (IV-AC)   |       |         |       |            |       |                       |   |         |   |        |   |
|------------------------|-------|------------|-----------------|------------|------------|------|----------|---------|-----------------------------------------|---------|--------|-------|--------|-------|-----------------------|-------|------------|---------|---------|-------|----------------------------|-------|---------|-------|------------|-------|-----------------------|---|---------|---|--------|---|
|                        |       |            |                 |            |            |      |          |         | Area Under the Curve (AUC)              |         |        |       |        |       | IV-Ghrelin or Placebo |       |            |         |         |       | Area Under the Curve (AUC) |       |         |       |            |       | IV-Ghrelin or Placebo |   |         |   |        |   |
|                        |       |            |                 |            |            |      |          |         | Baseline                                |         | IV-ASA |       | BrAc=0 |       | Baseline              |       | IV-Ghrelin |         | Placebo |       | Baseline                   |       | Post-LD |       | IV-Ghrelin |       | IV-AC                 |   | Post-AC |   | BrAc=0 |   |
|                        |       |            |                 |            |            |      |          |         | p                                       | q       | d      | d     | d      | d     | p                     | q     | d          | d       | d       | d     | p                          | q     | d       | d     | d          | d     | d                     | d | p       | q | d      | d |
| RPpos_552.2593_9.87    | RP    | pos        | 9.87            | 552.2593   |            |      | 4        |         | 0.10651                                 | 0.43981 | -0.38  | -0.05 | -0.21  | -0.19 | -0.30                 | -0.13 | 0.19816    | 0.71402 | -0.38   | -0.38 | -0.57                      | -0.46 | -0.37   | -0.47 | -0.47      | -0.17 |                       |   |         |   |        |   |
| RPpos_552.2661_11.18   | RP    | pos        | 11.18           | 552.2661   |            |      | 4        |         | 0.19398                                 | 0.53950 | 0.37   | 0.13  | 0.21   | 0.38  | 0.90                  | -0.29 | 0.87561    | 0.98217 | 0.02    | -0.61 | 0.27                       | 0.16  | -0.12   | 0.30  | 0.30       | -0.02 |                       |   |         |   |        |   |
| RPneg_552.28693_9.978  | RP    | neg        | 9.978           | 552.2869   |            |      | 4        |         | 0.08478                                 | 0.41065 | -0.42  | -0.20 | -0.22  | -0.16 | -0.12                 | -0.20 | 0.12959    | 0.62286 | 0.54    | 1.07  | 0.21                       | 0.14  | 0.63    | 0.93  | 0.00       | 0.00  |                       |   |         |   |        |   |
| RPneg_552.3064_10.232  | RP    | neg        | 10.232          | 552.3064   |            |      | 4        |         | 0.00943                                 | 0.18925 | -0.45  | -0.25 | -0.43  | -0.40 | -0.10                 | -0.29 | 0.18698    | 0.70221 | -0.05   | -0.03 | 0.08                       | -0.10 | 0.13    | -0.17 | -0.08      | -0.08 |                       |   |         |   |        |   |
| RPpos_552.3157_10.76   | RP    | pos        | 10.76           | 552.3157   |            |      | 4        |         | 0.72124                                 | 0.88631 | 0.02   | -0.21 | 0.84   | 0.04  | 0.05                  | 0.60  | 0.50464    | 0.63229 | -0.20   | -0.72 | -0.05                      | -0.28 | -0.14   | -0.32 | -0.29      | -0.29 |                       |   |         |   |        |   |
| RPneg_552.32906_10.198 | RP    | neg        | 10.198          | 552.3290   |            |      | 4        |         | 0.16256                                 | 0.50709 | -0.39  | 0.14  | -0.01  | -0.27 | -0.07                 | -0.21 | 0.97194    | 0.99671 | 0.11    | 0.19  | 0.15                       | 0.03  | 0.43    | 0.22  | 0.09       | 0.09  |                       |   |         |   |        |   |
| RPneg_552.33014_10.329 | RP    | neg        | 10.329          | 552.3301   |            |      | 4        |         | 0.15549                                 | 0.49814 | -0.30  | 0.28  | 0.01   | -0.31 | -0.12                 | -0.14 | 0.73459    | 0.95858 | 0.47    | 0.73  | 0.45                       | 0.23  | 0.20    | 0.66  | 0.34       | 0.34  |                       |   |         |   |        |   |
| RPneg_552.36719_11.067 | RP    | neg        | 11.067          | 552.3672   |            |      | 4        |         | 0.03906                                 | 0.31824 | -0.43  | 0.08  | 0.02   | -0.45 | -0.36                 | -0.43 | 0.87156    | 0.98105 | 0.21    | 0.10  | 0.51                       | 0.12  | 0.24    | 0.16  | -0.10      | -0.10 |                       |   |         |   |        |   |
| RPneg_552.36725_10.832 | RP    | neg        | 10.832          | 552.3673   |            |      | 4        |         | 0.01988                                 | 0.25642 | -0.55  | -0.07 | -0.21  | -0.44 | -0.44                 | -0.37 | 0.92150    | 0.98867 | 0.18    | 0.25  | 0.23                       | 0.11  | 0.26    | 0.07  | -0.03      | -0.03 |                       |   |         |   |        |   |
| HILICneg_552.3679_1.07 | HILIC | neg        | 1.07            | 552.3679   |            |      | 4        |         | 0.00069                                 | 0.05157 | -0.63  | -0.40 | -0.25  | -0.32 | -0.66                 | -0.40 | 0.49166    | 0.89836 | -0.05   | 1.09  | -0.71                      | -0.27 | 0.22    | 0.15  | 0.00       | 0.00  |                       |   |         |   |        |   |
| HILICneg_552.3679_1.33 | HILIC | neg        | 1.33            | 552.3679   |            |      | 4        |         | 0.00351                                 | 0.12132 | -0.60  | -0.10 | -0.27  | -0.42 | -0.67                 | -0.39 | 0.73820    | 0.95909 | 0.00    | -0.21 | -0.11                      | 0.41  | 0.11    | -0.04 | -0.17      | -0.17 |                       |   |         |   |        |   |
| RPpos_552.4014_11.27   | RP    | pos        | 11.27           | 552.4014   |            |      | 4        |         | 0.05736                                 | 0.36110 | -0.40  | -0.12 | -0.23  | -0.42 | -0.24                 | -0.57 | 0.86736    | 0.98025 | 0.01    | 0.15  | 0.06                       | -0.03 | 0.24    | -0.10 | -0.30      | -0.30 |                       |   |         |   |        |   |
| HILICpos_552.4021_1.12 | HILIC | pos        | 1.12            | 552.4021   |            |      | 4        |         | 0.00282                                 | 0.10941 | -0.59  | -0.20 | -0.33  | -0.55 | -0.38                 | -0.73 | 0.66788    | 0.94452 | 0.13    | 0.06  | 0.46                       | 0.74  | 0.07    | -0.25 | -0.27      | -0.27 |                       |   |         |   |        |   |
| HILICpos_552.4329_0.37 | HILIC | pos        | 0.37            | 552.4329   |            |      | 4        |         | 0.23717                                 | 0.57874 | -0.26  | 0.37  | -0.05  | -0.34 | 0.15                  | -0.56 | 0.88389    | 0.98281 | -0.07   | -0.01 | 0.44                       | 0.03  | -0.20   | -0.11 | -0.31      | -0.31 |                       |   |         |   |        |   |
| RPpos_552.6494_10.76   | RP    | pos        | 10.76           | 552.6494   |            |      | 4        |         | 0.49566                                 | 0.77379 | -0.18  | -0.14 | 0.85   | -0.34 | -0.05                 | 0.60  | 0.52220    | 0.90888 | -0.19   | -0.20 | 0.11                       | -0.28 | -0.04   | -0.52 | -0.18      | -0.18 |                       |   |         |   |        |   |
| HILICneg_552.7629_3.06 | HILIC | neg        | 3.06            | 552.7629   |            |      | 4        |         | 0.46060                                 | 0.75132 | -0.24  | 0.03  | 0.46   | -0.08 | -0.20                 | 0.86  | 0.87333    | 0.98156 | -0.06   | -0.12 | 0.38                       | 1.07  | -0.21   | -0.03 | -0.36      | -0.36 |                       |   |         |   |        |   |
| RPpos_552.9855_10.76   | RP    | pos        | 10.76           | 552.9855   |            |      | 4        |         | 0.98455                                 | 0.99408 | -0.04  | 0.01  | 0.85   | -0.05 | -0.13                 | 0.56  | 0.56832    | 0.92089 | -0.16   | -0.22 | 0.12                       | -0.14 | 0.30    | -0.59 | -0.43      | -0.43 |                       |   |         |   |        |   |
| RPpos_553.1934_9.99    | RP    | pos        | 9.99            | 553.1934   |            |      | 4        |         | 0.93503                                 | 0.97663 | 0.08   | 0.13  | 0.11   | 0.12  | 0.23                  | 0.08  | 0.74198    | 0.95998 | 0.09    | -0.02 | 0.13                       | 0.05  | 0.16    | 0.09  | 0.08       | 0.08  |                       |   |         |   |        |   |
| RPneg_553.2292_7.567   | RP    | neg        | 7.565           | 553.2299   |            |      | 4        |         | 0.07651                                 | 0.39745 | 0.44   | 0.37  | 0.43   | 0.67  | 0.87                  | 0.11  | 0.62312    | 0.93343 | -0.05   | -0.12 | 0.05                       | -0.08 | -0.08   | -0.01 | -0.08      | -0.08 |                       |   |         |   |        |   |
| RPpos_553.2454_9.887   | RP    | pos        | 9.887           | 553.2454   |            |      | 4        |         | 0.15963                                 | 0.50907 | -0.29  | 0.18  | 0.02   | -0.32 | -0.14                 | -0.13 | 0.13392    | 0.61408 | -0.43   | -0.28 | 0.64                       | -0.44 | 0.42    | -0.64 | -0.14      | -0.14 |                       |   |         |   |        |   |
| RPpos_553.2841_5.4     | RP    | pos        | 5.4             | 553.2841   |            |      | 4        |         | 0.47037                                 | 0.75741 | -0.17  | 0.44  | 0.00   | 0.15  | -0.26                 | -0.05 | 0.27013    | 0.78219 | -0.25   | -0.45 | -0.28                      | -0.40 | -0.45   | 0.55  | -0.33      | -0.33 |                       |   |         |   |        |   |
| RPneg_553.30048_8.622  | RP    | neg        | 8.622           | 553.3005   |            |      | 4        |         | 0.00031                                 | 0.03332 | 0.95   | 0.34  | 1.06   | 0.96  | 2.08                  | 0.29  | 0.05198    | 0.45407 | 0.79    | 0.11  | 1.19                       | 0.99  | 1.09    | 0.54  | 0.17       | 0.17  |                       |   |         |   |        |   |
| RPpos_553.3137_10.55   | RP    | pos        | 10.55           | 553.3137   |            |      | 4        |         | 0.03552                                 | 0.30879 | -0.27  | -0.01 | -0.02  | -0.21 | 0.11                  | -0.33 | 0.45159    | 0.88266 | 0.21    | 0.37  | 0.21                       | 0.06  | 0.16    | 0.28  | 0.11       | 0.11  |                       |   |         |   |        |   |
| HILICneg_553.3646_0.4  | HILIC | neg        | 0.4             | 553.3646   |            |      | 4        |         | 0.86688                                 | 0.95015 | -0.01  | 0.48  | -0.01  | 0.10  | 0.02                  | 0.18  | 0.10306    | 0.57770 | -0.46   | -0.37 | -0.19                      | -0.55 | -0.44   | -0.25 | -0.51      | -0.51 |                       |   |         |   |        |   |
| HILICpos_553.3678_0.36 | HILIC | pos        | 0.36            | 553.3678   |            |      | 4        |         | 0.49278                                 | 0.77286 | -0.22  | 1.06  | -0.41  | 1.07  | -0.13                 | -0.66 | 0.10991    | 0.59132 | -0.47   | -0.48 | -0.08                      | -0.17 | -0.07   | -0.12 | -0.33      | -0.33 |                       |   |         |   |        |   |
| RPpos_553.3685_14.09   | RP    | pos        | 14.09           | 553.3685   |            |      | 4        |         | 0.46237                                 | 0.75264 | -0.18  | 0.41  | -0.30  | 0.45  | 0.04                  | -0.02 | 0.00688    | 0.17540 | -0.32   | -0.34 | -0.12                      | 0.37  | -0.13   | -0.75 | -0.32      | -0.32 |                       |   |         |   |        |   |
| RPpos_553.3874_11.58   | RP    | pos        | 11.58           | 553.3874   |            |      | 4        |         | 0.71395                                 | 0.88348 | -0.14  | 0.31  | -0.17  | 0.11  | 0.27                  | -0.80 | 0.84713    | 0.97724 | -0.04   | 0.79  | -0.02                      | 0.34  | -0.36   | -0.58 | 0.58       | 0.58  |                       |   |         |   |        |   |
| RPpos_553.3908_11.18   | RP    | pos        | 11.18           | 553.3908   |            |      | 4        |         | 0.00143                                 | 0.07654 | 1.53   | 0.01  | 0.76   | 1.66  | 2.04                  | -0.12 | 0.75970    | 0.96233 | 0.07    | -0.03 | 0.23                       | -0.05 | 0.03    | 0.19  | -0.03      | -0.03 |                       |   |         |   |        |   |
| RPpos_554.0613_11.16   | RP    | pos        | 11.16           | 554.0613   |            |      | 4        |         | 0.00430                                 | 0.13280 | -0.98  | -0.21 | -0.40  | -1.15 | -1.53                 | -0.17 | 0.57602    | 0.92304 | 0.22    | 0.52  | -0.48                      | 0.32  | 0.65    | -0.11 | 0.15       | 0.15  |                       |   |         |   |        |   |
| RPpos_554.29_10.22     | RP    | pos        | 10.22           | 554.2900   |            |      | 4        |         | 0.01137                                 | 0.20452 | -0.44  | -0.27 | -0.23  | -0.55 | -0.02                 | -0.14 | 0.86565    | 0.98005 | 0.28    | -0.01 | 0.73                       | 0.26  | 0.84    | -0.07 | -0.20      | -0.20 |                       |   |         |   |        |   |
| RPpos_554.3011_10.76   | RP    | pos        | 10.76           | 554.3011   |            |      | 4        |         | 0.74572                                 | 0.89865 | 0.00   | 0.08  | 0.85   | -0.21 | 0.33                  | 1.30  | 0.26969    | 0.78175 | -0.30   | -0.08 | -0.06                      | -0.52 | -0.19   | -0.22 | -0.59      | -0.59 |                       |   |         |   |        |   |
| RPneg_554.30188_10.269 | RP    | neg        | 10.269          | 554.3019   |            |      | 4        |         | 0.05111                                 | 0.34797 | -0.58  | -0.28 | -0.18  | -0.05 | -0.24                 | -0.17 | 0.67065    | 0.94557 | 0.10    | 0.53  | 0.11                       | 0.10  | 0.06    | 0.23  | -0.54      | -0.54 |                       |   |         |   |        |   |
| RPneg_554.3025_10.132  | RP    | neg        | 10.132          | 554.3026   |            |      | 4        |         | 0.00057                                 | 0.13952 | -0.50  | -0.14 | -0.16  | -0.21 | -0.23                 | -0.87 | 0.37043    | 0.84063 | -0.17   | -0.16 | 0.12                       | 0.12  | 0.37    | 0.19  | -0.15      | -0.15 |                       |   |         |   |        |   |
| HILICneg_554.3032_1.16 | HILIC | neg        | 1.16            | 554.3032   |            |      | 4        |         | 0.00809                                 | 0.17726 | -0.75  | -0.13 | -0.30  | -0.40 | -0.82                 | -0.65 | 0.11202    | 0.59482 | 0.51    | 0.49  | 0.27                       | 0.85  | 0.45    | 0.00  | -0.19      | -0.19 |                       |   |         |   |        |   |
| RPneg_554.3139_9.771   | RP    | neg        | 9.771           | 554.3139   |            |      | 4        |         | 0.82329                                 | 0.93302 | 0.13   | -0.15 | 0.54   | 0.33  | 0.14                  | -0.31 | 0.66619    | 0.94388 | 0.13    | -0.53 | 0.29                       | 0.16  | 0.14    | 0.62  | -0.15      | -0.15 |                       |   |         |   |        |   |
| RPneg_554.34558_10.494 | RP    | neg        | 10.494          | 554.3456   |            |      | 4        |         | 0.04781                                 | 0.34122 | -0.41  | 0.04  | -0.14  | -0.46 | -0.30                 | -0.21 | 0.25433    | 0.76933 | -0.25   | -0.27 | -0.16                      | -0.24 | -0.13   | -0.23 | -0.23      | -0.23 |                       |   |         |   |        |   |
| RPneg_554.34589_10.618 | RP    | neg        | 10.618          | 554.3459   |            |      | 4        |         | 0.09557                                 | 0.36516 | -0.44  | -0.01 | -0.32  | -0.46 | -0.26                 | -0.18 | 0.29855    | 0.80069 | -0.21   | -0.19 | -0.22                      | -0.25 | -0.12   | 0.05  | -0.30      | -0.30 |                       |   |         |   |        |   |
| HILICneg_554.3459_1.29 | HILIC | neg        | 1.29            | 554.3459   |            |      | 4        |         | 0.01915                                 | 0.25205 | -0.51  | 0.06  | -0.23  | -0.45 | -0.50                 | -0.17 | 0.37091    | 0.84099 | -0.12   | -0.08 | -0.10                      | -0.07 | 0.04    | -0.18 | -0.19      | -0.19 |                       |   |         |   |        |   |
| RPneg_554.34674_10.558 | RP    | neg        | 10.558          | 554.3467   |            |      | 4        |         | 0.00848                                 | 0.18040 | -0.78  | -0.13 | -0.34  | -0.38 | -0.49                 | -0.28 | 0.86814    | 0.98025 | 0.08    | -0.03 | 0.28                       | 0.05  | 0.04    | 0.20  | -0.17      | -0.17 |                       |   |         |   |        |   |
| RPneg_554.38293_11.164 | RP    | neg        | 11.164          | 554.3829   |            |      | 4        |         | 0.00866                                 | 0.18262 | -0.61  | 0.09  | -0.21  | -0.51 | -1.05                 | -0.45 | 0.66974    | 0.94532 | -0.01   | 0.05  | -0.08                      | 0.12  | 0.09    | -0.07 | -0.06      | -0.06 |                       |   |         |   |        |   |
| HILICpos_554.3914_1.27 | HILIC | pos        | 1.27            | 554.3914   |            |      | 4        |         | 0.02234                                 | 0.26628 | -0.54  | 0.06  | 0.00   | -0.54 | -0.55                 | 0.17  | 0.34630    | 0.82929 | -0.10   | 0.17  | -0.30                      | -0.31 | 0.45    | -0.29 | -0.25      | -0.25 |                       |   |         |   |        |   |
| RPpos_554.4767_12.79   | RP    | pos        | 12.79           | 554.4767   |            |      | 4        |         | 0.50326                                 | 0.77822 | 0.29   | -0.02 | 1.01   | 0.42  | 0.37                  | -0.24 | 0.76481    | 0.96333 | 0.03    | -0.25 | -0.09                      | 0.17  | 0.34    | 0.08  | -0.05      | -0.05 |                       |   |         |   |        |   |
| RPneg_554.47748_12.436 | RP    | neg        | 12.436          | 554.4775   |            |      | 4        |         | 0.18987                                 | 0.53612 | -0.32  | 0.54  | -0.26  | -0.52 | 0.09                  | -0.68 | 0.07229    | 0.51276 | -0.20   | 0.06  | -0.05                      | -0.40 | -0.28   | -0.04 | -0.34      | -0.34 |                       |   |         |   |        |   |
| RPpos_554.6348_10.76   | RP    | pos        | 10.76           | 554.6348   |            |      | 4        |         | 0.55006                                 | 0.80368 | -0.17  | 0.05  | 0.74   | -0.41 | -0.10                 | 0.42  | 0.86742    | 0.98025 | -0.06   | -0.32 | 0.39                       | -0.23 | 0.10    | -0.16 | -0.25      | -0.25 |                       |   |         |   |        |   |
| RPneg_555.10052_7.955  | RP    | neg        | 7.955           | 555.1005   |            |      | 4        |         | 0.26303                                 | 0.60018 | -0.34  | 0.29  | 0.28   | -0.03 | 0.65                  | -0.02 | 0.31108    | 0.80910 | -0.12   | -0.03 | -0.15                      | 0.55  | -0.59   | -0.20 | -0.32      | -0.32 |                       |   |         |   |        |   |
| RPneg_555.10223_8.058  | RP    | neg        | 8.058           | 555.1022   |            |      | 4        |         | 0.21296                                 | 0.55552 | -0.40  | -0.11 | 0.16   | -0.19 | 0.44                  | 0.70  | 0.56963    | 0.92121 | -0.18   | -0.37 | 0.20                       | 0.25  | -0.27   | -0.44 | -0.37      | -0.37 |                       |   |         |   |        |   |
| HILICneg_555.1736_0.52 | HILIC | neg        | 0.52            | 555.1736   |            |      | 4        |         | 0.03880                                 | 0.31745 | 1.17   |       |        |       |                       |       |            |         |         |       |                            |       |         |       |            |       |                       |   |         |   |        |   |

|                        |       |            |                 |            |            |             |          |         |                                         |         |       | IV-Alcohol self-administration (IV-ASA) |       |       |                       |        |         |          |         |        |                            |       |       | IV-Alcohol clamp (IV-AC) |       |   |                       |          |         |        |        |  |  |  |  |
|------------------------|-------|------------|-----------------|------------|------------|-------------|----------|---------|-----------------------------------------|---------|-------|-----------------------------------------|-------|-------|-----------------------|--------|---------|----------|---------|--------|----------------------------|-------|-------|--------------------------|-------|---|-----------------------|----------|---------|--------|--------|--|--|--|--|
| Feature_ID             | Mode  | Ionization | Average_Rt.min. | Average_Mz | Metabolite | MSMS        | ID_Level | HMDB_ID | IV-Alcohol self-administration (IV-ASA) |         |       |                                         |       |       |                       |        |         |          |         |        | IV-Alcohol clamp (IV-AC)   |       |       |                          |       |   |                       |          |         |        |        |  |  |  |  |
|                        |       |            |                 |            |            |             |          |         | Area Under the Curve (AUC)              |         |       |                                         |       |       | IV-Ghrelin or Placebo |        |         |          |         |        | Area Under the Curve (AUC) |       |       |                          |       |   | IV-Ghrelin or Placebo |          |         |        |        |  |  |  |  |
|                        |       |            |                 |            |            |             |          |         | p                                       | q       | d     | d                                       | d     | d     | Baseline              | IV-ASA | BrAC=0  | Baseline | Post-LD | IV-ASA | BrAC=0                     | p     | q     | d                        | d     | d | d                     | Baseline | Post-LD | IV-ASA | BrAC=0 |  |  |  |  |
| HILICneg_557.4568_0.38 | HILIC | neg        | 0.38            |            |            |             | 4        |         | 0.11488                                 | 0.45035 | 0.26  | 0.30                                    | 0.20  | 0.30  | 0.78                  | 0.11   | 0.61145 | 0.93043  | -0.07   | 0.05   | -0.04                      | -0.09 | 0.02  | -0.05                    | -0.26 |   |                       |          |         |        |        |  |  |  |  |
| RPneg_557.45697_12.276 | RP    | neg        | 12.276          |            |            |             | 4        |         | 0.41801                                 | 0.72193 | 0.03  | 0.16                                    | 0.22  | 0.05  | 0.18                  | 0.34   | 0.73871 | 0.95923  | -0.06   | 0.09   | -0.23                      | 0.05  | 0.23  | -0.25                    | -0.07 |   |                       |          |         |        |        |  |  |  |  |
| RPneg_557.45703_12.88  | RP    | neg        | 12.88           |            |            |             | 4        |         | 0.07113                                 | 0.38635 | 0.07  | 0.03                                    | 0.12  | 0.22  | 0.14                  | 0.29   | 0.90136 | 0.98561  | -0.06   | 0.05   | -0.27                      | 0.05  | 0.18  | -0.05                    | -0.15 |   |                       |          |         |        |        |  |  |  |  |
| RPneg_557.45709_12.753 | RP    | neg        | 12.753          |            |            |             | 4        |         | 0.59910                                 | 0.82804 | 0.00  | 0.06                                    | 0.11  | 0.27  | 0.02                  | 0.05   | 0.89817 | 0.98519  | 0.02    | 0.17   | -0.09                      | 0.05  | 0.05  | 0.10                     | 0.05  |   |                       |          |         |        |        |  |  |  |  |
| RPneg_557.45728_12.18  | RP    | neg        | 12.18           |            |            |             | 4        |         | 0.87071                                 | 0.95148 | -0.12 | 0.09                                    | 0.02  | 0.23  | 0.12                  | -0.10  | 0.36428 | 0.77648  | -0.22   | -0.02  | -0.17                      | 0.04  | 0.07  | -0.19                    | -0.25 |   |                       |          |         |        |        |  |  |  |  |
| RPneg_557.45737_12.397 | RP    | neg        | 12.397          |            |            |             | 4        |         | 0.33969                                 | 0.66217 | 0.09  | 0.17                                    | 0.37  | 0.15  | 0.20                  | 0.34   | 0.47716 | 0.83337  | -0.11   | 0.02   | 0.11                       | 0.12  | -0.21 | -0.09                    | -0.10 |   |                       |          |         |        |        |  |  |  |  |
| RPneg_557.45789_12.073 | RP    | neg        | 12.073          |            |            |             | 4        |         | 0.99633                                 | 0.99871 | -0.09 | -0.03                                   | 0.04  | -0.02 | 0.16                  | 0.40   | 0.89330 | 0.98435  | -0.03   | 0.03   | -0.12                      | -0.11 | -0.15 | 0.29                     | -0.73 |   |                       |          |         |        |        |  |  |  |  |
| RPpos_557.6351_11.21   | RP    | pos        | 11.21           |            |            |             | 4        |         | 0.32635                                 | 0.65171 | -0.26 | -0.36                                   | 0.59  | -0.24 | -0.37                 | 0.48   | 0.82392 | 0.97343  | -0.13   | 0.06   | 0.08                       | -0.27 | 0.26  | -0.73                    | 0.00  |   |                       |          |         |        |        |  |  |  |  |
| RPpos_557.6625_10.49   | RP    | pos        | 10.49           |            |            |             | 4        |         | 0.73572                                 | 0.89335 | -0.10 | -0.23                                   | 0.52  | -0.21 | 0.05                  | 0.76   | 0.46349 | 0.88698  | -0.17   | -0.18  | 0.02                       | 0.00  | 0.11  | -0.66                    | -0.44 |   |                       |          |         |        |        |  |  |  |  |
| RPpos_557.9714_11.21   | RP    | pos        | 11.21           |            |            |             | 4        |         | 0.82756                                 | 0.93480 | -0.08 | -0.57                                   | 0.72  | -0.06 | 0.20                  | 0.48   | 0.84497 | 0.97699  | 0.01    | -0.09  | 0.17                       | 0.08  | 0.42  | -0.45                    | -0.11 |   |                       |          |         |        |        |  |  |  |  |
| HILICneg_558.2363_1.92 | HILIC | neg        | 1.92            |            |            |             | 4        |         | 0.17364                                 | 0.51908 | -0.29 | -0.12                                   | 0.29  | 0.32  | -0.11                 | -0.14  | 0.23548 | 0.75310  | 0.57    | 0.14   | 0.35                       | 0.46  | 1.31  | 0.39                     | -0.08 |   |                       |          |         |        |        |  |  |  |  |
| HILICpos_558.2421_0.65 | HILIC | pos        | 0.65            |            |            |             | 4        |         | 0.13078                                 | 0.46774 | -0.26 | 0.09                                    | 0.28  | -0.25 | -0.36                 | 0.28   | 0.15152 | 0.65718  | 0.46    | 0.26   | 0.26                       | 0.01  | 0.71  | 0.58                     | -0.27 |   |                       |          |         |        |        |  |  |  |  |
| RPneg_558.26709_9.861  | RP    | neg        | 9.861           |            |            |             | 4        |         | 0.97369                                 | 0.99026 | -0.05 | 0.36                                    | 0.47  | -0.10 | -0.09                 | 0.10   | 0.86851 | 0.98025  | -0.05   | 0.21   | 0.06                       | -0.12 | -0.11 | -0.17                    | -0.04 |   |                       |          |         |        |        |  |  |  |  |
| RPpos_558.292_8.41     | RP    | pos        | 8.41            |            |            |             | 4        |         | 0.65170                                 | 0.85315 | 0.02  | 0.15                                    | 0.13  | 0.08  | 0.09                  | -0.28  | 0.49852 | 0.90085  | 0.15    | 0.15   | 0.12                       | 0.18  | 0.14  | 0.19                     | 0.13  |   |                       |          |         |        |        |  |  |  |  |
| HILICpos_558.2927_1.25 | HILIC | pos        | 1.25            |            |            |             | 4        |         | 0.02585                                 | 0.27992 | -0.58 | -0.43                                   | -0.11 | -0.43 | -0.46                 | 0.03   | 0.23029 | 0.74705  | 0.47    | 0.67   | 0.02                       | 0.44  | 0.89  | 0.19                     | -0.09 |   |                       |          |         |        |        |  |  |  |  |
| RPpos_558.2948_10.12   | RP    | pos        | 10.12           |            |            |             | 4        |         | 0.01807                                 | 0.24514 | -0.40 | -0.23                                   | -0.10 | -0.18 | -0.27                 | -0.61  | 0.44316 | 0.87946  | 0.15    | 0.06   | 0.25                       | 0.12  | 0.23  | 0.20                     | -0.21 |   |                       |          |         |        |        |  |  |  |  |
| HILICpos_558.2949_1.12 | HILIC | pos        | 1.12            |            |            |             | 4        |         | 0.01318                                 | 0.20468 | -0.38 | -0.01                                   | -0.16 | -0.24 | -0.17                 | -0.67  | 0.73103 | 0.95779  | 0.09    | 0.04   | -0.11                      | 0.11  | 0.43  | 0.07                     | 0.04  |   |                       |          |         |        |        |  |  |  |  |
| RPpos_558.3029_11.21   | RP    | pos        | 11.21           |            |            |             | 4        |         | 0.57931                                 | 0.81790 | -0.16 | -0.34                                   | 0.70  | -0.24 | -0.14                 | 0.80   | 0.82617 | 0.97408  | -0.12   | -0.36  | 0.09                       | 0.12  | 0.06  | -0.40                    | -0.14 |   |                       |          |         |        |        |  |  |  |  |
| HILICpos_558.3112_0.44 | HILIC | pos        | 0.44            |            |            |             | 4        |         | 0.57463                                 | 0.81603 | -0.12 | 0.13                                    | 0.57  | 0.01  | 0.29                  | 0.33   | 0.17295 | 0.68576  | 0.19    | 0.66   | 0.34                       | 0.07  | 0.66  | -0.19                    | -0.28 |   |                       |          |         |        |        |  |  |  |  |
| RPneg_558.33173_10.78  | RP    | neg        | 10.78           |            |            |             | 4        |         | 0.01656                                 | 0.23770 | -0.44 | 0.09                                    | -0.12 | -0.36 | -0.22                 | -0.52  | 0.34381 | 0.82783  | 0.01    | -0.07  | 0.07                       | 0.07  | 0.10  | -0.01                    | -0.22 |   |                       |          |         |        |        |  |  |  |  |
| HILICneg_558.3329_1.24 | HILIC | neg        | 1.24            |            |            |             | 4        |         | 0.05912                                 | 0.36474 | -0.46 | -0.09                                   | 0.03  | -0.24 | -0.36                 | -0.38  | 0.66464 | 0.94320  | -0.05   | -0.11  | -0.10                      | -0.08 | 0.11  | -0.25                    | 0.10  |   |                       |          |         |        |        |  |  |  |  |
| RPneg_558.33356_10.893 | RP    | neg        | 10.893          |            |            |             | 4        |         | 0.01838                                 | 0.24729 | -0.58 | 0.14                                    | -0.12 | -0.31 | -0.81                 | -0.37  | 0.49318 | 0.89856  | -0.01   | 0.06   | -0.01                      | 0.01  | 0.14  | -0.04                    | -0.35 |   |                       |          |         |        |        |  |  |  |  |
| HILICpos_558.3853_0.41 | HILIC | pos        | 0.41            |            |            |             | 4        |         | 0.64379                                 | 0.84911 | -0.03 | 0.26                                    | 0.41  | 0.03  | 0.12                  | 0.00   | 0.70494 | 0.95242  | -0.21   | -0.06  | 0.11                       | -0.32 | -0.06 | -0.44                    | 0.66  |   |                       |          |         |        |        |  |  |  |  |
| RPpos_558.5088_14.02   | RP    | pos        | 14.02           |            |            |             | 4        |         | 0.72574                                 | 0.88831 | 0.16  | 0.20                                    | 0.71  | 0.56  | 0.47                  | -0.32  | 0.19391 | 0.70867  | -0.17   | -0.17  | -0.14                      | -0.06 | -0.16 | -0.15                    | -0.41 |   |                       |          |         |        |        |  |  |  |  |
| RPpos_558.5099_13.47   | RP    | pos        | 13.47           |            |            |             | 4        |         | 0.56499                                 | 0.81162 | 0.07  | 1.21                                    | -0.12 | 0.75  | -0.16                 | 0.16   | 0.06694 | 0.49920  | -0.31   | -0.33  | -0.08                      | 0.63  | -0.26 | -0.32                    | -0.31 |   |                       |          |         |        |        |  |  |  |  |
| RPpos_558.6472_10.49   | RP    | pos        | 10.49           |            |            |             | 4        |         | 0.36480                                 | 0.68237 | 0.08  | -0.14                                   | 0.91  | -0.20 | 0.25                  | 0.68   | 0.44224 | 0.87945  | -0.19   | -0.14  | 0.08                       | -0.23 | -0.15 | -0.33                    | -0.44 |   |                       |          |         |        |        |  |  |  |  |
| RPpos_558.932_11.2     | RP    | pos        | 11.2            |            |            |             | 4        |         | 0.66271                                 | 0.85876 | 0.11  | -0.04                                   | 0.33  | 0.07  | 0.36                  | 0.72   | 0.83881 | 0.97596  | -0.09   | -0.26  | 0.17                       | -0.02 | 0.27  | -0.39                    | -0.62 |   |                       |          |         |        |        |  |  |  |  |
| HILICneg_558.9882_5.41 | HILIC | neg        | 5.41            |            |            |             | 4        |         | 0.36997                                 | 0.68609 | 0.27  | 0.49                                    | 0.44  | 0.09  | 0.42                  | 0.63   | 0.09469 | 0.56315  | 0.13    | -0.09  | 0.11                       | 0.30  | 0.12  | 0.33                     | -0.37 |   |                       |          |         |        |        |  |  |  |  |
| RPneg_559.12988_7.507  | RP    | neg        | 7.507           |            |            |             | 4        |         | 0.00911                                 | 0.18742 | 0.54  | 0.11                                    | 0.65  | 0.68  | 0.90                  | 0.83   | 0.00630 | 0.16726  | 0.31    | -0.11  | 0.08                       | 0.17  | 0.85  | 0.48                     | -0.04 |   |                       |          |         |        |        |  |  |  |  |
| HILICpos_559.1495_2.47 | HILIC | pos        | 2.47            |            |            |             | 4        |         | 0.03426                                 | 0.30469 | -0.38 | -0.14                                   | -0.18 | -0.34 | -0.46                 | 0.08   | 0.43734 | 0.87685  | -0.43   | -0.04  | 0.17                       | -0.63 | -0.61 | -0.50                    | 0.03  |   |                       |          |         |        |        |  |  |  |  |
| RPpos_559.2679_11.2    | RP    | pos        | 11.2            |            |            |             | 4        |         | 0.17861                                 | 0.52425 | 0.27  | -0.33                                   | 0.62  | 0.26  | 0.66                  | 0.92   | 0.40536 | 0.86004  | -0.21   | -0.17  | 0.09                       | -0.49 | 0.45  | -0.24                    | -0.70 |   |                       |          |         |        |        |  |  |  |  |
| RPneg_559.29663_5.203  | RP    | neg        | 5.203           |            |            |             | 4        |         | 0.47500                                 | 0.76161 | 0.21  | -0.07                                   | 0.79  | 0.06  | 0.51                  | 0.28   | 0.98329 | 0.99758  | 0.01    | -0.31  | 0.12                       | 0.03  | 0.16  | -0.01                    | -0.28 |   |                       |          |         |        |        |  |  |  |  |
| RPpos_559.3479_10.19   | RP    | pos        | 10.19           |            |            |             | 4        |         | 0.94303                                 | 0.97921 | 0.04  | 0.29                                    | 0.25  | 0.03  | 0.31                  | -0.10  | 0.81918 | 0.97328  | -0.12   | 0.06   | 0.15                       | 0.25  | 0.04  | -0.66                    | -0.34 |   |                       |          |         |        |        |  |  |  |  |
| RPpos_559.4721_12.14   | RP    | pos        | 12.14           |            |            |             | 4        |         | 0.08154                                 | 0.40618 | 0.36  | 0.88                                    | 0.39  | 0.03  | 0.59                  | 0.80   | 0.55949 | 0.91988  | -0.12   | -0.22  | -0.07                      | -0.20 | 0.40  | -0.20                    | -0.34 |   |                       |          |         |        |        |  |  |  |  |
| RPneg_559.4729_10.916  | RP    | neg        | 10.916          |            |            |             | 4        |         | 0.00070                                 | 0.05215 | 1.70  | -0.15                                   | 0.67  | 1.22  | 2.83                  | 0.12   | 0.50684 | 0.90372  | -0.21   | -0.29  | 0.13                       | -0.40 | -0.12 | -0.29                    | -0.08 |   |                       |          |         |        |        |  |  |  |  |
| HILICneg_560.2386_2.05 | HILIC | neg        | 2.05            |            |            |             | 4        |         | 0.52346                                 | 0.78944 | -0.17 | -0.17                                   | 0.33  | 0.28  | -0.09                 | -0.11  | 0.95135 | 0.99366  | -0.01   | -0.09  | 0.01                       | 0.00  | 0.25  | 0.03                     | -0.36 |   |                       |          |         |        |        |  |  |  |  |
| RPneg_560.29773_9.676  | RP    | neg        | 9.676           |            |            |             | 4        |         | 0.29853                                 | 0.62865 | -0.24 | 0.01                                    | -0.21 | -0.30 | 0.02                  | 0.12   | 0.45108 | 0.88230  | 0.60    | 0.56   | 0.55                       | 0.37  | 0.93  | 0.78                     | 0.44  |   |                       |          |         |        |        |  |  |  |  |
| RPpos_560.3055_7.31    | RP    | pos        | 7.31            |            |            | no autoMSMS | 4        |         | 0.00139                                 | 0.07596 | 1.22  | -0.11                                   | 1.09  | 1.63  | 2.63                  | 0.16   | 0.00014 | 0.01563  | 1.64    | 0.00   | 0.30                       | 1.11  | 2.13  | 2.61                     | 2.26  |   |                       |          |         |        |        |  |  |  |  |
| RPpos_560.3059_6.83    | RP    | pos        | 6.83            |            |            |             | 4        |         | 0.00782                                 | 0.17365 | 0.40  | 0.18                                    | 0.25  | 0.42  | 0.57                  | 0.67   | 0.33819 | 0.82464  | 0.23    | -0.03  | -0.02                      | 0.06  | 0.30  | 0.45                     | 0.71  |   |                       |          |         |        |        |  |  |  |  |
| HILICpos_560.3094_1.19 | HILIC | pos        | 1.19            |            |            |             | 4        |         | 0.01488                                 | 0.22933 | -0.42 | 0.04                                    | -0.20 | -0.33 | -0.19                 | -0.53  | 0.32140 | 0.81567  | 0.31    | 0.33   | 0.35                       | 0.23  | 0.27  | 0.34                     | 0.33  |   |                       |          |         |        |        |  |  |  |  |
| HILICpos_560.3094_1.08 | HILIC | pos        | 1.08            |            |            |             | 4        |         | 0.01725                                 | 0.24148 | -0.35 | -0.04                                   | -0.27 | -0.20 | 0.02                  | -0.35  | 0.35335 | 0.83284  | 0.34    | 0.29   | 0.21                       | 0.43  | 0.28  | 0.21                     | 0.28  |   |                       |          |         |        |        |  |  |  |  |
| RPpos_560.3108_10.55   | RP    | pos        | 10.55           |            |            |             | 4        |         | 0.00430                                 | 0.13280 | -0.51 | -0.14                                   | -0.23 | -0.37 | -0.13                 | -0.43  | 0.59225 | 0.92666  | 0.32    | 0.29   | 0.44                       | 0.33  | 0.29  | 0.09                     | -0.09 |   |                       |          |         |        |        |  |  |  |  |
| RPneg_560.32996_10.895 | RP    | neg        | 10.895          |            |            |             | 4        |         | 0.02164                                 | 0.26377 | -0.60 | 0.02                                    | -0.06 | -0.34 | -0.99                 | -0.39  | 0.61626 | 0.93208  | -0.06   | 0.17   | -0.55                      | 0.02  | 0.11  | 0.11                     | -0.05 |   |                       |          |         |        |        |  |  |  |  |
| RPpos_560.3628_6.43    | RP    | pos        | 6.43            |            |            |             | 4        |         | 0.76923                                 | 0.90913 | -0.08 | 0.33                                    | 0.29  | 0.29  | -0.10                 | 0.57   | 0.76382 | 0.96328  | -0.13   | -0.02  | 0.05                       | 0.10  | 0.05  | -1.07                    | -0.30 |   |                       |          |         |        |        |  |  |  |  |
| RPpos_560.3643_6.87    | RP    | pos        | 6.87            |            |            |             | 4        |         | 0.56883                                 | 0.81337 | -0.16 | -0.33                                   | 0.43  | -0.10 | -0.23                 | 0.37   | 0.92127 | 0.98863  | 0.00    | 0.09   | 0.14                       | 0.20  | -0.02 | -0.74                    | -0.12 |   |                       |          |         |        |        |  |  |  |  |
| RPpos_560.3646_0.46    | RP    | pos        | 0.46            |            |            |             | 4        |         | 0.54586                                 | 0.80124 | -0.17 | -0.23                                   | 0.39  | -0.06 | -0.21                 | 0.35   | 0.92323 | 0.98898  | 0.00    | 0.06   | 0.16                       | 0.18  | 0.00  | -0.79                    | -0.12 |   |                       |          |         |        |        |  |  |  |  |
| RPpos_560.3678_11.08   | RP    | pos        | 11.08           |            |            |             | 4        |         | 0.06311                                 | 0.37122 | -0.34 | -0.15                                   | -0.17 | -0.34 | -0.10                 | -0.44  | 0.40790 | 0.86181  | -0.04   | -0.20  | 0.21                       | 0.33  | 0.08  | 0.07                     | -0.14 |   |                       |          |         |        |        |  |  |  |  |
| RPpos_560.4153_10.71   | RP    | pos        | 10.71           |            |            |             | 4        |         | 0.99932                                 | 0.99970 | 0.05  | 0.17                                    | 0.65  | -0.04 | 0.34                  | -0.19  | 0.86216 | 0.97982  | -0.17   | 0.07   | 0.24                       | -0.51 | 0.21  | -0.57                    | 0.30  |   |                       |          |         |        |        |  |  |  |  |
| RPpos_560.4714_15.39   | RP    | pos        | 15.39           |            |            |             | 4        |         | 0.99513                                 | 0.99821 | -0.07 | 0.61                                    | -0.42 | 0.75  | -0.07                 | -0.11  | 0.12630 | 0.61763  | -0.34   | -0.40  | 0.40                       | -0.08 | 0.39  | -0.18                    | -0.29 |   |                       |          |         |        |        |  |  |  |  |
| RPpos_560.8207_10.18   | RP    | pos        | 10.18           |            |            |             | 4        |         | 0.73923                                 | 0.89485 | -0.07 | -0.05                                   | 0.55  | -0.09 | -0.05                 | 0.73   | 0.30739 | 0.80704  | -0.18   | -0.17  | -0.20                      | -0.12 | -0.16 | -0.17                    | -0.24 |   |                       |          |         |        |        |  |  |  |  |
| HILICpos_561.0039_5.32 | HILIC | pos        | 5.32            |            |            |             | 4        |         | 0.43131                                 | 0.73094 |       |                                         |       |       |                       |        |         |          |         |        |                            |       |       |                          |       |   |                       |          |         |        |        |  |  |  |  |









| Feature_ID             | Mode  | Ionization | Average_Rt.min. | Average_Mz | Metabolite | MSMS | ID_Level | HMDB_ID  | IV-Alcohol self-administration (IV-ASA) |         |       |       |       |                       |       |         |         |         | IV-Alcohol clamp (IV-AC)   |       |       |       |       |                       |      |   |   |   |
|------------------------|-------|------------|-----------------|------------|------------|------|----------|----------|-----------------------------------------|---------|-------|-------|-------|-----------------------|-------|---------|---------|---------|----------------------------|-------|-------|-------|-------|-----------------------|------|---|---|---|
|                        |       |            |                 |            |            |      |          |          | Area Under the Curve (AUC)              |         |       |       |       | IV-Ghrelin or Placebo |       |         |         |         | Area Under the Curve (AUC) |       |       |       |       | IV-Ghrelin or Placebo |      |   |   |   |
|                        |       |            |                 |            |            |      |          |          | p                                       | q       | d     | d     | d     | d                     | d     | d       | d       | d       | d                          | p     | q     | d     | d     | d                     | d    | d | d | d |
| RPneg_579.43866_12.277 | RP    | neg        | 12.277          | 0.37       | 579.43866  |      | 4        |          | 0.17312                                 | 0.51861 | 0.31  | 0.37  | 0.36  | 0.54                  | 0.36  | 0.74    | 0.83309 | 0.97501 | 0.03                       | -0.20 | 0.07  | 0.18  | -0.26 | 0.20                  | 0.24 |   |   |   |
| HILICneg_579.5005_0.39 | HILIC | neg        | 0.39            | 579.5005   |            | 4    |          | 0.04981  | 0.34618                                 | 0.46    | 0.24  | 0.23  | 0.40  | 1.44                  | -0.03 | 0.66454 | 0.94315 | -0.11   | -0.01                      | 0.04  | -0.09 | -0.17 | -0.10 | -0.23                 |      |   |   |   |
| RPpos_579.7926_10.82   | RP    | pos        | 10.82           | 579.7926   |            | 4    |          | 0.86002  | 0.94760                                 | -0.08   | -0.17 | 0.76  | -0.11 | -0.05                 | 0.21  | 0.59736 | 0.92780 | -0.18   | -0.25                      | -0.11 | -0.14 | 0.24  | 0.68  | -0.15                 |      |   |   |   |
| HILICneg_580.1986_1.06 | HILIC | neg        | 1.06            | 580.1986   |            | 4    |          | 0.10803  | 0.44140                                 | 0.39    | -0.24 | 0.77  | 0.50  | 0.58                  | 0.17  | 0.10120 | 0.57331 | 0.44    | 0.34                       | 0.77  | 0.51  | 0.48  | 0.02  | -0.14                 |      |   |   |   |
| RPneg_580.23499_10.871 | RP    | neg        | 10.871          | 580.23499  |            | 4    |          | 0.06721  | 0.37964                                 | -0.38   | -0.02 | -0.20 | 0.09  | -0.36                 | -0.30 | 0.48664 | 0.89768 | -0.14   | -0.26                      | -0.28 | -0.18 | 0.16  | -0.09 | -0.42                 |      |   |   |   |
| RPneg_580.23499_10.768 | RP    | neg        | 10.768          | 580.23499  |            | 4    |          | 0.05801  | 0.31968                                 | -0.43   | -0.34 | -0.19 | 0.21  | -0.42                 | -0.21 | 0.04671 | 0.68021 | -0.12   | 0.22                       | 0.12  | 0.23  | 0.11  | 0.02  | -0.42                 |      |   |   |   |
| HILICpos_580.2711_4.7  | HILIC | pos        | 4.7             | 580.2711   |            | 4    |          | 0.85602  | 0.94602                                 | -0.09   | 0.02  | 0.20  | -0.34 | -0.03                 | 1.41  | 0.93045 | 0.98982 | 0.02    | 0.44                       | 0.15  | 1.22  | 0.12  | 0.02  | -0.39                 |      |   |   |   |
| RPneg_580.2868_9.881   | RP    | neg        | 9.881           | 580.2868   |            | 4    |          | 0.15830  | 0.50154                                 | -0.33   | -0.06 | -0.06 | -0.21 | -0.22                 | -0.17 | 0.15617 | 0.66291 | -0.41   | -0.42                      | -0.53 | -0.61 | -0.44 | -0.50 | -0.30                 |      |   |   |   |
| RPneg_580.28687_9.721  | RP    | neg        | 9.721           | 580.28687  |            | 4    |          | 0.22304  | 0.56558                                 | -0.29   | 0.00  | -0.03 | -0.17 | -0.20                 | -0.24 | 0.07220 | 0.51269 | -0.53   | -0.68                      | -0.51 | -0.75 | -0.57 | -0.72 | -0.30                 |      |   |   |   |
| RPpos_580.2908_10.3    | RP    | pos        | 10.3            | 580.2908   |            | 4    |          | 0.00820  | 0.17884                                 | -0.58   | -0.06 | -0.24 | -0.48 | -0.49                 | -0.07 | 0.28084 | 0.78964 | -0.17   | 0.07                       | -0.41 | -0.20 | -0.12 | 0.03  | -0.38                 |      |   |   |   |
| RPneg_580.3172_10.342  | RP    | neg        | 10.342          | 580.3172   |            | 4    |          | 0.01897  | 0.25058                                 | -0.48   | -0.08 | -0.31 | -0.29 | -0.16                 | -0.39 | 0.60436 | 0.92892 | -0.12   | 0.13                       | 0.01  | -0.25 | -0.10 | 0.06  | -0.37                 |      |   |   |   |
| RPneg_580.31952_10.475 | RP    | neg        | 10.475          | 580.3195   |            | 4    |          | 0.08820  | 0.41555                                 | -0.37   | -0.24 | -0.15 | -0.10 | -0.04                 | -0.41 | 0.99620 | 0.99953 | -0.01   | -0.03                      | -0.07 | -0.33 | 0.09  | 0.41  | -0.24                 |      |   |   |   |
| RPneg_580.32654_8.858  | RP    | neg        | 8.858           | 580.3265   |            | 4    |          | 0.04395  | 0.33333                                 | -0.39   | -0.24 | -0.21 | -0.26 | -0.42                 | -0.59 | 0.06141 | 0.48401 | -0.08   | -0.11                      | -0.08 | -0.05 | 0.02  | -0.08 | -0.12                 |      |   |   |   |
| RPneg_580.33777_11.336 | RP    | neg        | 11.336          | 580.3378   |            | 4    |          | 0.92445  | 0.97276                                 | -0.01   | 0.42  | 0.00  | 0.26  | 0.23                  | -0.06 | 0.74603 | 0.96075 | 0.00    | 0.12                       | -0.38 | -0.38 | 0.05  | 0.21  | -0.38                 |      |   |   |   |
| RPneg_580.3598_10.782  | RP    | neg        | 10.782          | 580.3598   |            | 4    |          | 0.15617  | 0.49915                                 | -0.40   | -0.02 | -0.20 | -0.41 | 0.17                  | -0.20 | 0.73693 | 0.95871 | 0.17    | 0.10                       | 0.50  | -0.18 | 0.18  | 0.34  | 0.07                  |      |   |   |   |
| RPneg_580.36029_10.664 | RP    | neg        | 10.664          | 580.3603   |            | 4    |          | 0.02455  | 0.27551                                 | -0.36   | 0.21  | 0.22  | -0.35 | -0.41                 | -0.25 | 0.88364 | 0.98281 | 0.03    | -0.08                      | 0.08  | -0.11 | 0.08  | 0.22  | 0.00                  |      |   |   |   |
| RPneg_580.3996_11.233  | RP    | neg        | 11.233          | 580.3996   |            | 4    |          | 0.01554  | 0.23292                                 | -0.49   | -0.22 | -0.24 | -0.37 | -0.61                 | -0.51 | 0.08345 | 0.53792 | -0.26   | -0.25                      | -0.10 | -0.29 | -0.20 | -0.27 | -0.31                 |      |   |   |   |
| HILICpos_580.4082_1.19 | HILIC | pos        | 1.19            | 580.4082   |            | 4    |          | 0.01092  | 0.20273                                 | -0.38   | -0.07 | -0.11 | -0.22 | -0.34                 | -0.44 | 0.43407 | 0.87551 | 0.26    | 0.21                       | 0.50  | 0.13  | 0.05  | 0.17  | 0.42                  |      |   |   |   |
| HILICpos_580.4333_1.07 | HILIC | pos        | 1.07            | 580.4333   |            | 4    |          | 0.21072  | 0.55378                                 | -0.38   | -0.34 | -0.16 | -0.36 | -0.35                 | -0.54 | 0.51210 | 0.90613 | 0.19    | -0.07                      | 0.51  | 0.18  | 0.64  | 0.48  | 0.31                  |      |   |   |   |
| RPneg_580.49408_12.577 | RP    | neg        | 12.577          | 580.4941   |            | 4    |          | 0.12317  | 0.45893                                 | -0.55   | 0.41  | -0.34 | -0.71 | 0.19                  | -0.22 | 0.48348 | 0.89638 | -0.10   | 0.03                       | 0.34  | 0.79  | 0.25  | 0.04  | -0.37                 |      |   |   |   |
| HILICneg_580.9713_5.41 | HILIC | neg        | 5.41            | 580.9713   |            | 4    |          | 0.36944  | 0.68581                                 | 0.25    | 0.32  | 0.46  | 0.05  | 0.50                  | 0.80  | 0.06369 | 0.48965 | 0.10    | -0.23                      | 0.07  | 0.25  | 0.20  | 0.27  | -0.37                 |      |   |   |   |
| RPpos_581.0735_10.64   | RP    | pos        | 10.64           | 581.0735   |            | 4    |          | 0.46271  | 0.75269                                 | -0.12   | 0.00  | 0.20  | 0.34  | -0.19                 | -0.06 | 0.19901 | 0.71482 | -0.50   | 0.36                       | -0.96 | -0.14 | 0.04  | -0.66 | 0.24                  |      |   |   |   |
| RPpos_581.1637_7.46    | RP    | pos        | 7.46            | 581.1637   |            | 4    |          | 0.05037  | 0.34713                                 | -0.40   | -0.11 | 0.02  | -0.18 | -0.55                 | 0.22  | 0.35509 | 0.83325 | 0.64    | 0.04                       | 0.53  | -0.13 | 0.55  | 0.26  | -0.04                 |      |   |   |   |
| HILICpos_581.1647_0.51 | HILIC | pos        | 0.51            | 581.1647   |            | 4    |          | 0.12858  | 0.46467                                 | -0.26   | 0.11  | 0.16  | -0.28 | -0.21                 | 0.06  | 0.34340 | 0.82770 | 0.68    | 0.06                       | 0.41  | -0.29 | 0.92  | 0.76  | -0.07                 |      |   |   |   |
| RPneg_581.20398_10.003 | RP    | neg        | 10.003          | 581.2040   |            | 4    |          | 0.44734  | 0.74252                                 | 0.13    | 0.21  | 0.25  | 0.09  | 0.29                  | 0.09  | 0.95675 | 0.99457 | 0.10    | 0.09                       | 0.19  | 0.00  | 0.16  | 0.05  | 0.13                  |      |   |   |   |
| HILICpos_581.237_0.44  | HILIC | pos        | 0.44            | 581.2370   |            | 4    |          | 0.33350  | 0.65720                                 | 0.55    | 0.38  | 0.73  | 0.85  | 0.82                  | -0.47 | 0.52044 | 0.90888 | 0.23    | 0.34                       | 0.26  | 0.10  | 0.42  | 0.27  | -0.05                 |      |   |   |   |
| RPpos_581.2394_9.2     | RP    | pos        | 9.2             | 581.2394   |            | 4    |          | 0.70985  | 0.88156                                 | 0.43    | 0.36  | 0.20  | 0.67  | 0.46                  | -0.20 | 0.20673 | 0.72342 | 0.46    | 0.64                       | 0.14  | 0.34  | 1.05  | 0.32  | 0.23                  |      |   |   |   |
| RPneg_581.24127_9.208  | RP    | neg        | 9.208           | 581.2413   |            | 4    |          | 0.68533  | 0.87026                                 | 0.14    | 0.36  | 0.01  | 0.25  | 0.26                  | 0.00  | 0.48811 | 0.89812 | 0.25    | 0.32                       | 0.12  | 0.38  | 0.27  | 0.20  | -0.26                 |      |   |   |   |
| RPpos_581.2413_11.73   | RP    | pos        | 11.73           | 581.2413   |            | 4    |          | 0.54089  | 0.79847                                 | 0.42    | 0.57  | 0.31  | 0.41  | 0.59                  | -0.28 | 0.12680 | 0.61796 | 0.85    | 1.22                       | 0.80  | 1.08  | 0.66  | 0.43  | 0.02                  |      |   |   |   |
| RPneg_581.24146_11.754 | RP    | neg        | 11.754          | 581.2415   |            | 4    |          | 0.86982  | 0.95121                                 | 0.27    | 0.55  | 0.04  | 0.31  | 0.53                  | -0.14 | 0.20588 | 0.72174 | 0.65    | 0.80                       | 0.47  | 0.58  | 0.49  | 0.37  | 0.04                  |      |   |   |   |
| RPpos_581.2759_10.3    | RP    | pos        | 10.3            | 581.2759   |            | 4    |          | 0.00344  | 0.11973                                 | -0.65   | 0.15  | -0.13 | -0.31 | -0.70                 | -0.40 | 0.05473 | 0.46302 | -0.23   | -0.39                      | -0.45 | -0.36 | -0.16 | -0.19 | 0.71                  |      |   |   |   |
| HILICpos_581.2912_2.07 | HILIC | pos        | 2.07            | 581.2912   |            | 4    |          | 2.796_06 | 0.00229                                 | 1.48    | 0.88  | 1.72  | 1.68  | 1.95                  | 0.69  | 0.69653 | 0.95988 | 0.16    | -0.08                      | 0.08  | 0.18  | 0.42  | 0.40  | -0.13                 |      |   |   |   |
| RPneg_581.31952_10.132 | RP    | neg        | 10.132          | 581.3195   |            | 4    |          | 0.03440  | 0.22702                                 | -0.45   | 0.14  | 0.04  | -0.29 | -0.35                 | -0.30 | 0.59750 | 0.67780 | 0.11    | 0.04                       | 0.05  | 0.17  | 0.37  | 0.07  | 0.27                  |      |   |   |   |
| RPpos_581.3989_15.4    | RP    | pos        | 15.4            | 581.3989   |            | 4    |          | 0.32809  | 0.65277                                 | 0.11    | 0.96  | 1.11  | 0.36  | 0.19                  | -0.29 | 0.03616 | 0.38855 | -0.34   | -0.41                      | -0.65 | 0.12  | 0.16  | 0.15  | -0.27                 |      |   |   |   |
| RPpos_581.4061_10.64   | RP    | pos        | 10.64           | 581.4061   |            | 4    |          | 0.70722  | 0.88047                                 | -0.11   | 0.27  | 0.78  | -0.03 | -0.31                 | -0.10 | 0.72359 | 0.95590 | -0.21   | 0.21                       | -0.52 | 0.47  | -0.36 | -0.21 | 0.55                  |      |   |   |   |
| RPpos_581.4539_12.14   | RP    | pos        | 12.14           | 581.4539   |            | 4    |          | 0.36405  | 0.68205                                 | 0.07    | 0.09  | 0.13  | 0.27  | 0.37                  | 0.05  | 0.89173 | 0.98433 | -0.03   | 0.10                       | -0.12 | -0.03 | 0.29  | -0.14 | -0.25                 |      |   |   |   |
| RPpos_581.6672_10.75   | RP    | pos        | 10.75           | 581.6672   |            | 4    |          | 0.70007  | 0.87734                                 | -0.12   | -0.27 | 0.73  | -0.05 | -0.11                 | 0.42  | 0.46039 | 0.88511 | -0.20   | -0.18                      | -0.05 | -0.31 | -0.04 | -0.29 | -0.38                 |      |   |   |   |
| RPpos_582.0002_10.75   | RP    | pos        | 10.75           | 582.0002   |            | 4    |          | 0.67464  | 0.86434                                 | -0.13   | -0.23 | 0.61  | -0.07 | -0.07                 | 0.51  | 0.46469 | 0.88732 | -0.21   | -0.22                      | -0.03 | -0.22 | -0.03 | -0.35 | -0.43                 |      |   |   |   |
| HILICneg_582.2357_1.88 | HILIC | neg        | 1.88            | 582.2357   |            | 4    |          | 0.05969  | 0.36544                                 | -0.43   | -0.36 | 0.07  | -0.71 | 0.03                  | -0.07 | 0.62243 | 0.93343 | 0.28    | 0.17                       | 0.14  | 0.25  | 0.55  | 0.50  | 0.12                  |      |   |   |   |
| RPpos_582.2452_9.19    | RP    | pos        | 9.19            | 582.2452   |            | 4    |          | 0.66820  | 0.86143                                 | 0.33    | 0.29  | 0.63  | 0.43  | 0.56                  | -0.08 | 0.13038 | 0.62397 | 0.41    | 0.37                       | 0.98  | 0.00  | 0.22  | 0.29  | 0.31                  |      |   |   |   |
| HILICpos_582.247_0.64  | HILIC | pos        | 0.64            | 582.2470   |            | 4    |          | 0.73978  | 0.89520                                 | 0.17    | 0.33  | -0.12 | 0.43  | 0.38                  | 0.31  | 0.31352 | 0.81132 | 0.47    | 1.63                       | 0.38  | -0.13 | 0.55  | 0.07  | 0.65                  |      |   |   |   |
| RPpos_582.2479_8.18    | RP    | pos        | 8.18            | 582.2479   |            | 4    |          | 0.21162  | 0.55439                                 | 0.51    | 0.61  | 0.77  | 0.31  | 0.83                  | -0.48 | 0.17757 | 0.69242 | 1.18    | 2.59                       | 1.29  | 1.19  | 0.78  | 0.94  | -0.21                 |      |   |   |   |
| RPneg_582.2719_8.692   | RP    | neg        | 8.692           | 582.2719   |            | 4    |          | 0.05854  | 0.36393                                 | 0.79    | 0.01  | 2.13  | 0.68  | 0.62                  | 0.46  | 0.03500 | 0.38291 | 0.91    | -0.40                      | 1.20  | 1.81  | 0.77  | 0.80  | -0.21                 |      |   |   |   |
| HILICpos_582.2951_1.17 | HILIC | pos        | 1.17            | 582.2951   |            | 4    |          | 0.01376  | 0.22322                                 | -0.40   | -0.04 | -0.03 | -0.16 | -0.15                 | -0.55 | 0.44642 | 0.88048 | 0.37    | 0.09                       | 0.24  | 0.53  | 0.38  | 0.36  | 0.05                  |      |   |   |   |
| RPpos_582.2952_10.12   | RP    | pos        | 10.12           | 582.2952   |            | 4    |          | 0.00747  | 0.16959                                 | -0.47   | -0.13 | 0.08  | -0.32 |                       |       |         |         |         |                            |       |       |       |       |                       |      |   |   |   |

| Feature_ID              | Mode  | Ionization | Average_Rt.min. | Average_Mz | Metabolite | MSMS | ID_Level | HMDB_ID | IV-Alcohol self-administration (IV-ASA) |         |       |        |       |       |       |                       |         |         |          |       |       |         | IV-Alcohol clamp (IV-AC)   |       |       |         |         |         |         |                       |       |       |       |         |         |         |       |       |       |       |       |         |       |
|-------------------------|-------|------------|-----------------|------------|------------|------|----------|---------|-----------------------------------------|---------|-------|--------|-------|-------|-------|-----------------------|---------|---------|----------|-------|-------|---------|----------------------------|-------|-------|---------|---------|---------|---------|-----------------------|-------|-------|-------|---------|---------|---------|-------|-------|-------|-------|-------|---------|-------|
|                         |       |            |                 |            |            |      |          |         | Area Under the Curve (AUC)              |         |       |        |       |       |       | IV-Ghrelin or Placebo |         |         |          |       |       |         | Area Under the Curve (AUC) |       |       |         |         |         |         | IV-Ghrelin or Placebo |       |       |       |         |         |         |       |       |       |       |       |         |       |
|                         |       |            |                 |            |            |      |          |         | Baseline                                |         |       | IV-ASA |       |       |       | BraC=0                |         |         | Baseline |       |       | Post-LD |                            |       |       | IV-AC   |         |         | Post-AC |                       |       |       |       |         |         |         |       |       |       |       |       |         |       |
|                         |       |            |                 |            |            |      |          |         | p                                       | q       | d     | d      | d     | d     | d     | d                     | p       | q       | d        | d     | d     | d       | d                          | d     | d     | d       | d       | d       | d       | d                     |       |       |       |         |         |         |       |       |       |       |       |         |       |
| HILICneg_583_9581_3_01  | HILIC | neg        | 3.01            | 583.9581   |            |      | 4        |         | 0.92879                                 | 0.97456 | 0.01  | 0.07   | 0.14  | -0.01 | 0.45  | 0.04                  | 0.64655 | 0.93858 | 0.12     | 0.05  | 0.08  | 0.33    | 0.15                       | 0.24  | -0.22 | 0.57819 | 0.92334 | -0.20   | -0.16   | 0.02                  | -0.16 | -0.17 | -0.19 | -0.56   |         |         |       |       |       |       |       |         |       |
| RPpos_583_987_10_75     | RP    | pos        | 10.75           | 583.9870   |            |      | 4        |         | 0.96304                                 | 0.98666 | -0.02 | -0.40  | 0.82  | 0.09  | -0.11 | 0.41                  | 0.57819 | 0.92334 | -0.20    | -0.16 | 0.02  | -0.16   | -0.17                      | -0.19 | -0.56 | 0.34328 | 0.82748 | -0.30   | -0.48   | -0.25                 | -0.54 | -0.07 | -0.41 | 0.08    |         |         |       |       |       |       |       |         |       |
| RPneg_584_2289_9_721    | RP    | neg        | 9.721           | 584.2281   |            |      | 4        |         | 0.35605                                 | 0.67523 | -0.24 | -0.24  | 0.00  | -0.13 | 0.05  | -0.13                 | 0.34328 | 0.82748 | -0.30    | -0.48 | -0.25 | -0.54   | -0.07                      | -0.41 | 0.08  | 0.16640 | 0.51167 | -0.33   | -0.07   | 0.02                  | -0.21 | -0.20 | -0.18 | 0.26544 | 0.77769 | -0.33   | -0.42 | -0.40 | -0.37 | -0.45 | -0.35 | -0.29   |       |
| RPneg_584_2289_9_881    | RP    | neg        | 9.881           | 584.2284   |            |      | 4        |         | 0.172429                                | 0.89240 | -0.20 | 0.10   | 0.23  | 0.26  | 0.63  | 0.05                  | 0.26544 | 0.77769 | -0.33    | -0.42 | -0.40 | -0.37   | -0.45                      | -0.35 | -0.29 | 0.75917 | 0.90495 | 0.16    | 0.35    | 0.25                  | 0.18  | 0.19  | 0.06  | 0.35    | 0.36888 | 0.85994 | 0.51  | 0.15  | 0.40  | 0.36  | 0.88  | 0.35    | 0.05  |
| HILICneg_584_2385_1_91  | HILIC | neg        | 1.91            | 584.2385   |            |      | 4        |         | 0.74255                                 | 0.75917 | 0.09  | 0.29   | 0.04  | 0.21  | 0.25  | 0.28                  | 0.35373 | 0.75155 | 0.16     | 0.35  | 0.25  | 0.18    | 0.19                       | 0.06  | 0.35  | 0.05    | 0.74255 | 0.89699 | 0.09    | 0.16                  | -0.03 | 0.12  | 0.28  | 0.24    | 0.37456 | 0.84348 | 0.11  | 0.10  | 0.03  | 0.06  | 0.40  | 0.10    | -0.21 |
| HILICpos_584_2617_0_39  | HILIC | pos        | 0.39            | 584.2617   |            |      | 4        |         | 3.02E-07                                | 0.00047 | 0.80  | 0.04   | 1.10  | 0.84  | 1.55  | 0.32                  | 0.00007 | 0.00896 | 0.64     | -0.15 | 2.43  | 0.91    | 0.41                       | 0.35  | -0.44 | 0.12628 | 0.79454 | 0.21    | 0.21    | 0.23                  | 0.19  | 0.19  | 0.19  | 0.12628 | 0.79454 | 0.21    | 0.21  | 0.23  | 0.19  | 0.19  | 0.19  | 0.12628 |       |
| HILICneg_584_2825_1_06  | HILIC | neg        | 1.06            | 584.2825   |            |      | 4        |         | 0.40504                                 | 0.71204 | -0.24 | -0.17  | 0.88  | -0.12 | -0.35 | 0.29                  | 0.40404 | 0.85938 | -0.25    | -0.20 | -0.06 | -0.15   | 0.02                       | -0.41 | -0.49 | 0.40504 | 0.71204 | -0.24   | -0.17   | 0.88                  | -0.12 | -0.35 | 0.29  | 0.40404 | 0.85938 | -0.25   | -0.20 | -0.06 | -0.15 | 0.02  | -0.41 | -0.49   |       |
| HILICpos_584_3282_0_43  | HILIC | pos        | 0.43            | 584.3282   |            |      | 4        |         | 0.51905                                 | 0.78756 | -0.18 | -0.29  | 0.97  | -0.11 | -0.24 | 0.64                  | 0.24898 | 0.76555 | -0.32    | -0.22 | -0.07 | -0.20   | -0.11                      | -0.71 | -0.40 | 0.05491 | 0.35643 | -0.37   | 0.06    | -0.07                 | -0.30 | -0.20 | -0.55 | 0.69344 | 0.95008 | 0.05    | 0.31  | 0.19  | 0.29  | 0.09  | -0.30 | -0.18   |       |
| RPpos_584_3314_10_53    | RP    | pos        | 10.53           | 584.3314   |            |      | 4        |         | 0.48583                                 | 0.76801 | -0.04 | -0.36  | -0.19 | -0.10 | 0.35  | 0.23                  | 0.29635 | 0.79904 | 0.35     | -0.19 | 0.73  | 0.78    | 0.32                       | 0.14  | -0.13 | 0.18785 | 0.53402 | -0.30   | -0.13   | -0.16                 | -0.24 | -0.26 | -0.39 | 0.33279 | 0.82231 | 0.17    | 0.09  | 0.00  | 0.16  | 0.50  | 0.14  | 0.19    |       |
| RPneg_584_34534_9_222   | RP    | neg        | 9.222           | 584.3453   |            |      | 4        |         | 0.27719                                 | 0.61167 | -0.27 | -0.13  | -0.05 | -0.25 | -0.17 | -0.30                 | 0.25102 | 0.76715 | 0.14     | 0.14  | 0.20  | 0.05    | 0.14                       | 0.27  | 0.10  | 0.31633 | 0.64375 | -0.35   | 0.37    | -0.14                 | -0.17 | -0.23 | -0.75 | 0.87486 | 0.98214 | 0.19    | -0.17 | 0.16  | 0.04  | 0.27  | 0.67  | -0.06   |       |
| RPneg_584_34845_10_98   | RP    | neg        | 10.98           | 584.3485   |            |      | 4        |         | 0.30120                                 | 0.63066 | -0.27 | 0.03   | 0.09  | -0.34 | -0.26 | -0.38                 | 0.25832 | 0.77329 | 0.18     | 0.21  | 0.28  | 0.22    | 0.42                       | -0.33 | 0.17  | 0.14656 | 0.48795 | -0.42   | 0.21    | 0.12                  | -0.19 | -0.32 | -0.82 | 0.86834 | 0.98025 | 0.15    | 0.00  | 0.28  | 0.25  | 0.23  | 0.16  | -0.25   |       |
| RPneg_584_35583_9_315   | RP    | neg        | 9.315           | 584.3558   |            |      | 4        |         | 0.28383                                 | 0.61773 | -0.28 | -0.42  | 0.14  | -0.24 | -0.31 | -0.09                 | 0.52703 | 0.91004 | 0.23     | 0.12  | -0.07 | 0.63    | 0.40                       | -0.24 | -0.26 | 0.08686 | 0.41280 | 0.33    | 0.21    | 0.75                  | 0.33  | 0.23  | 0.81  | 0.58974 | 0.92655 | 0.01    | -0.07 | 0.11  | -0.15 | 0.05  | 0.09  | -0.05   |       |
| RPneg_584_35596_9_452   | RP    | neg        | 9.452           | 584.3560   |            |      | 4        |         | 0.33058                                 | 0.65474 | 0.16  | 0.31   | 0.41  | 0.14  | 0.17  | 0.71                  | 0.72582 | 0.95600 | 0.04     | -0.11 | 0.12  | 0.05    | 0.13                       | 0.07  | -0.09 | 0.67302 | 0.86385 | 0.17    | 0.50    | 0.37                  | 0.23  | 0.23  | 0.25  | 0.73058 | 0.95757 | -0.29   | -0.03 | -0.07 | 0.19  | -0.42 | -0.46 | 0.21    |       |
| HILICneg_584_3566_1_76  | HILIC | neg        | 1.76            | 584.3566   |            |      | 4        |         | 0.73568                                 | 0.89335 | 0.08  | 0.21   | 0.37  | 0.27  | 0.22  | -0.28                 | 0.63960 | 0.93638 | 0.18     | 0.15  | 0.21  | 0.10    | 0.26                       | 0.15  | 0.08  | 0.10323 | 0.43579 | -0.50   | -0.20   | -0.32                 | 0.05  | -0.32 | 0.91  | 0.47299 | 0.89180 | -0.32   | -0.76 | -0.36 | 0.16  | -0.05 | -0.42 | 0.42    |       |
| HILICneg_584_357_1_65   | HILIC | neg        | 1.65            | 584.3570   |            |      | 4        |         | 0.90543                                 | 0.96529 | 0.09  | 0.45   | 0.43  | 0.33  | 0.44  | -0.37                 | 0.29794 | 0.79993 | -0.17    | -0.23 | -0.12 | -0.09   | -0.10                      | -0.19 | -0.34 | 0.88262 | 0.95651 | 0.06    | 0.48    | 1.47                  | 0.01  | -0.73 | -0.68 | 0.00013 | 0.01455 | 1.58    | 0.82  | 2.10  | 2.93  | 0.95  | 0.52  | 0.11    | -0.34 |
| RPneg_584_3584_10_537   | RP    | neg        | 10.537          | 584.3584   |            |      | 4        |         | 0.02140                                 | 0.26302 | -0.43 | -0.06  | 0.22  | -0.35 | -0.63 | 0.04                  | 0.25486 | 0.76996 | 0.37     | 0.12  | 0.42  | -0.26   | 0.79                       | 0.34  | 0.01  | 0.02140 | 0.26302 | -0.43   | -0.06   | 0.22                  | -0.35 | -0.63 | 0.04  | 0.25486 | 0.76996 | 0.37    | 0.12  | 0.42  | -0.26 | 0.79  | 0.34  | 0.01    |       |
| RPpos_584_3622_8_58     | RP    | pos        | 8.58            | 584.3622   |            |      | 4        |         | 0.35276                                 | 0.67243 | 0.59  | 0.77   | 0.43  | 0.65  | 0.59  | -0.14                 | 0.67511 | 0.94679 | 0.18     | 0.54  | 0.20  | 0.76    | 0.17                       | -0.42 | -0.22 | 0.69120 | 0.87313 | 0.48    | 0.63    | 0.37                  | 0.63  | 0.69  | -0.38 | 0.31754 | 0.81373 | 0.38    | 1.20  | 0.29  | 0.40  | 0.37  | -0.08 | 0.43    |       |
| RPpos_584_3653_7_83     | RP    | pos        | 7.83            | 584.3653   |            |      | 4        |         | 0.55093                                 | 0.80405 | 0.36  | 0.62   | 0.30  | 0.44  | 0.55  | -0.16                 | 0.27189 | 0.78275 | 0.52     | 0.71  | 0.61  | 0.62    | 0.47                       | 0.26  | 0.09  | 0.50275 | 0.77785 | 0.60    | 0.59    | 1.03                  | 0.77  | 0.70  | -0.29 | 0.40676 | 0.86073 | 0.18    | 0.78  | 0.41  | 0.04  | 0.17  | -0.05 | 0.15    |       |
| RPneg_584_3655_0_56     | HILIC | pos        | 0.56            | 584.3655   |            |      | 4        |         | 0.50018                                 | 0.77625 | 0.62  | 0.62   | 1.11  | 0.77  | 0.77  | -0.34                 | 0.36162 | 0.83579 | 0.23     | 0.78  | 0.45  | 0.03    | 0.26                       | 0.06  | 0.16  | 0.06741 | 0.37971 | 0.66    | 0.13    | 1.33                  | 0.61  | 0.65  | 1.00  | 0.07462 | 0.51783 | 0.77    | -0.12 | 0.76  | -0.46 | 0.51  | 0.01  | 0.19    |       |
| HILICpos_584_4199_10_68 | HILIC | pos        | 10.68           | 584.4199   |            |      | 4        |         | 0.06741                                 | 0.37971 | 0.66  | 0.13   | 1.33  | 0.61  | 0.65  | 1.00                  | 0.07462 | 0.51783 | 0.77     | -0.12 | 0.76  | -0.46   | 0.51                       | 0.01  | 0.19  | 0.10360 | 0.22161 | -0.68   | 0.20    | 0.14                  | -0.38 | -1.28 | -0.52 | 0.16435 | 0.67450 | -0.26   | -0.04 | 0.04  | -0.26 | -0.36 | -0.30 | 0.00    |       |
| HILICneg_584_4232_0_38  | HILIC | pos        | 0.38            | 584.4232   |            |      | 4        |         | 0.02334                                 | 0.27043 | -0.42 | -0.10  | -0.12 | -0.45 | -0.12 | -0.47                 | 0.30924 | 0.80799 | 0.00     | 0.02  | 0.10  | -0.09   | 0.22                       | -0.14 | -0.26 | 0.00343 | 0.11973 | 1.45    | 0.01    | 0.78                  | 1.18  | 3.10  | -0.30 | 0.56897 | 0.92109 | -0.18   | -0.42 | 0.22  | 0.57  | 0.04  | 0.01  | 0.04    |       |
| RPpos_584_475_10_93     | RP    | pos        | 10.93           | 584.4750   |            |      | 4        |         | 0.84804                                 | 0.94323 | 0.03  | 0.06   | 0.30  | -0.12 | 0.28  | 1.18                  | 0.15370 | 0.65949 | 0.07     | 0.56  | -0.01 | -0.03   | 0.23                       | 0.25  | -0.79 | 0.62043 | 0.83888 | 0.14    | 0.03    | 0.82                  | 0.25  | 0.18  | -0.07 | 0.01370 | 0.24969 | 0.50    | 0.27  | 0.50  | 0.60  | 1.16  | 0.23  | -0.40   |       |
| RPpos_584_5233_14_21    | RP    | pos        | 14.21           | 584.5233   |            |      | 4        |         | 0.57604                                 | 0.81638 | -0.12 | 0.02   | 0.65  | -0.10 | 0.35  | -0.04                 | 0.08748 | 0.54647 | 0.20     | 0.33  | 0.21  | 0.28    | 0.63                       | -0.11 | -0.43 | 0.80177 | 0.92346 | -0.09   | 0.19    | 0.85                  | -0.06 | 0.78  | 0.46  | 0.90392 | 0.98615 | -0.15   | 0.96  | 0.02  | 0.25  | -0.03 | -0.36 | -0.49   |       |
| RPneg_585_20764_6_476   | RP    | neg        | 6.476           | 585.2076   |            |      | 4        |         | 0.07813                                 | 0.40019 | -0.50 | -0.11  | -0.55 | 0.12  | -0.07 | -0.64                 | 0.04367 | 0.42056 | -0.15    | -0.87 | -0.16 | 0.82    | -0.61                      | 0.13  | 0.41  | 0.20100 | 0.54568 | -0.22   | -0.04   | -0.01                 | -0.14 | -0.04 | -0.30 | 0.99141 | 0.99863 | 0.03    | 0.06  | 0.12  | 0.03  | 0.11  | 0.09  | -0.10   |       |
| RPneg_585_2693_1_24     | HILIC | pos        | 1.24            | 585.2693   |            |      | 4        |         | 0.22122                                 | 0.56379 | -0.22 | 0.01   | -0.02 | -0.14 | -0.07 | -0.28                 | 0.90331 | 0.98602 | 0.00     | 0.00  | 0.16  | -0.01   | 0.04                       | 0.03  | -0.11 | 0.58828 | 0.82310 | 0.07    | 0.13    | 0.94                  | 0.17  | 0.02  | 0.47  | 0.56242 | 0.92016 | -0.10   | -0.23 | 0.06  | -0.11 | 0.23  | -0.32 | -0.27   |       |
| HILICpos_585_2697_0_63  | HILIC | pos        | 0.63            | 585.2697   |            |      | 4        |         | 0.77424                                 | 0.91096 | 0.03  | -0.09  | 0.90  | 0.09  | -0.05 | 0.83                  | 0.48134 | 0.89516 | -0.11    | -0.19 | 0.13  | -0.24   | 0.08                       | -0.26 | -0.22 | 0.22122 | 0.56379 | -0.22   | 0.01    | -0.02                 | -0.14 | -0.07 | -0.28 | 0.90331 | 0.98602 | 0.00    | 0.00  | 0.16  | -0.01 | 0.04  | 0.03  | -0.11   |       |
| RPpos_585_2708_11_73    | RP    | pos        | 11.73           | 585.2708   |            |      | 4        |         | 0.77424                                 | 0.91096 | 0.03  | -0.09  | 0.90  | 0.09  | -0.05 | 0.83                  | 0.48134 | 0.89516 | -0.11    | -0.19 | 0.13  | -0.24   | 0.08                       | -0.26 | -0.22 | 0.77424 | 0.91096 | 0.03    | -0.09   | 0.90                  | 0.09  | -0.05 | 0.83  | 0.48134 | 0.89516 | -0.11   | -0.19 | 0.13  | -0.24 | 0.08  | -0.26 | -0.22   |       |
| RPpos_585_2715_5_88     | RP    | pos        | 5.88            | 585.2715   |            |      | 4        |         | 0.77889                                 | 0.69367 | -0.25 | -0.44  | 0.38  | -0.25 | -0.51 | 0.51                  | 0.73568 | 0.95858 | -0.12    | -0.04 | -0.12 | -0.01   | 0.10                       | -0.54 | -0.15 | 0.77889 | 0.69367 | -0.25   | -0.44   | 0.38                  | -0.25 | -0.51 | 0.51  | 0.73568 | 0.95858 | -0.12   | -0.04 | -0.12 | -0.01 | 0.10  | -0.54 | -0.15   |       |
| RPpos_585_2716_7_13     | RP    | pos        | 7.13            | 585.2716   |            |      | 4        |         | 0.89408                                 | 0.96172 | -0.05 | 0.09   | 0.82  | 0.01  | -0.13 | 0.47                  | 0.39656 | 0.85559 | -0.18    | -0.18 | 0.03  | -0.18   | 0.11                       | -0.54 | -0.27 | 0.89408 | 0.96172 | -0.05   | 0.09    | 0.82                  | 0.01  | -0.13 | 0.47  | 0.39656 | 0.85559 | -0.18   | -0.18 | 0.03  | -0.18 | 0.11  | -0.54 | -0.27   |       |
| RPneg_585_28564_9_353   | RP</  |            |                 |            |            |      |          |         |                                         |         |       |        |       |       |       |                       |         |         |          |       |       |         |                            |       |       |         |         |         |         |                       |       |       |       |         |         |         |       |       |       |       |       |         |       |

|                        |       |            |                 |            |            |      |          |         |                            |         | IV-Alcohol self-administration (IV-ASA) |       |       |          |       |       |         |         |                            |       | IV-Alcohol clamp (IV-AC) |       |       |          |       |   |   |   |         |   |   |   |   |       |   |   |   |   |
|------------------------|-------|------------|-----------------|------------|------------|------|----------|---------|----------------------------|---------|-----------------------------------------|-------|-------|----------|-------|-------|---------|---------|----------------------------|-------|--------------------------|-------|-------|----------|-------|---|---|---|---------|---|---|---|---|-------|---|---|---|---|
| Feature_ID             | Mode  | Ionization | Average_Rt.min. | Average_Mz | Metabolite | MSMS | ID_Level | HMDB_ID | IV-Ghrelin or Placebo      |         |                                         |       |       |          |       |       |         |         | IV-Ghrelin or Placebo      |       |                          |       |       |          |       |   |   |   |         |   |   |   |   |       |   |   |   |   |
|                        |       |            |                 |            |            |      |          |         | Area Under the Curve (AUC) |         |                                         |       |       | Baseline |       |       |         |         | Area Under the Curve (AUC) |       |                          |       |       | Baseline |       |   |   |   | Post-LD |   |   |   |   | IV-AC |   |   |   |   |
|                        |       |            |                 |            |            |      |          |         | p                          | q       | d                                       | d     | d     | d        | d     | d     | d       | d       | p                          | q     | d                        | d     | d     | d        | d     | d | d | d | d       | d | d | d | d | d     | d | d | d | d |
| HILICneg_590.2155_0.37 | HILIC | neg        | 0.37            | 590.2155   |            |      | 4        |         | 0.16852                    | 0.51355 | -0.28                                   | 0.51  | -0.16 | -0.19    | -0.19 | 0.10  | 0.96895 | 0.99673 | 0.02                       | -0.01 | -0.10                    | 0.31  | -0.21 | 0.13     | -0.09 |   |   |   |         |   |   |   |   |       |   |   |   |   |
| HILICneg_590.2261_1.06 | HILIC | neg        | 1.06            | 590.2261   |            |      | 4        |         | 0.00009                    | 0.01707 | 0.61                                    | -0.20 | 1.19  | 0.73     | 0.77  | 0.25  | 0.01815 | 0.28753 | 0.44                       | -0.24 | 0.83                     | 0.75  | 0.37  | 0.27     | -0.34 |   |   |   |         |   |   |   |   |       |   |   |   |   |
| RPpos_590.3205_10.22   | RP    | pos        | 10.22           | 590.3205   |            |      | 4        |         | 0.05619                    | 0.35880 | -0.34                                   | -0.50 | -0.39 | -0.46    | 0.34  | -0.15 | 0.38481 | 0.84935 | 0.01                       | 0.22  | 0.21                     | -0.51 | 0.66  | 0.05     | -0.60 |   |   |   |         |   |   |   |   |       |   |   |   |   |
| RPpos_590.521_10.11    | RP    | pos        | 10.11           | 590.5210   |            |      | 4        |         | 0.00453                    | 0.13581 | -0.46                                   | -0.28 | -0.26 | -0.47    | -0.05 | -0.66 | 0.40690 | 0.86073 | 0.16                       | 0.24  | 0.27                     | 0.02  | 0.14  | 0.42     | -0.22 |   |   |   |         |   |   |   |   |       |   |   |   |   |
| RPneg_590.3468_10.461  | RP    | neg        | 10.461          | 590.3468   |            |      | 4        |         | 0.02089                    | 0.26105 | -0.55                                   | -0.32 | -0.33 | -0.31    | -0.02 | -0.21 | 0.78525 | 0.96675 | -0.05                      | 0.04  | -0.12                    | 0.34  | 0.53  | 0.02     | -0.20 |   |   |   |         |   |   |   |   |       |   |   |   |   |
| RPneg_590.3475_10.537  | RP    | neg        | 10.537          | 590.3474   |            |      | 4        |         | 0.25633                    | 0.59479 | -0.02                                   | -0.10 | -0.10 | -0.06    | 0.00  | -0.23 | 0.64683 | 0.63088 | 0.24                       | -0.35 | -0.36                    | 0.31  | 0.28  | -0.25    | 0.40  |   |   |   |         |   |   |   |   |       |   |   |   |   |
| RPpos_590.381_10.72    | RP    | pos        | 10.72           | 590.3810   |            |      | 4        |         | 0.02108                    | 0.26175 | -0.53                                   | -0.27 | -0.45 | -0.70    | -0.07 | -0.35 | 0.64672 | 0.93869 | -0.16                      | -0.09 | -0.22                    | -0.10 | -0.01 | -0.10    | -0.27 |   |   |   |         |   |   |   |   |       |   |   |   |   |
| HILICpos_590.3895_0.38 | HILIC | pos        | 0.38            | 590.3895   |            |      | 4        |         | 0.67705                    | 0.86597 | 0.07                                    | 0.24  | 0.79  | -0.04    | 0.28  | 0.03  | 0.56000 | 0.91988 | -0.22                      | -0.26 | 0.11                     | -0.16 | -0.25 | -0.29    | 0.26  |   |   |   |         |   |   |   |   |       |   |   |   |   |
| HILICpos_590.4528_0.86 | HILIC | pos        | 0.86            | 590.4528   |            |      | 4        |         | 0.37930                    | 0.69388 | -0.14                                   | 0.29  | 0.25  | -0.36    | 0.19  | -0.38 | 0.50432 | 0.90327 | -0.22                      | -0.21 | 0.09                     | -0.15 | -0.31 | -0.36    | -0.24 |   |   |   |         |   |   |   |   |       |   |   |   |   |
| HILICpos_590.4536_1.12 | HILIC | pos        | 1.12            | 590.4536   |            |      | 4        |         | 0.01124                    | 0.20487 | -0.46                                   | -0.07 | 0.45  | -0.70    | -0.41 | -0.24 | 0.36536 | 0.83821 | -0.28                      | -0.61 | 0.29                     | 0.01  | -0.30 | -0.39    | -0.56 |   |   |   |         |   |   |   |   |       |   |   |   |   |
| HILICpos_590.4761_0.39 | HILIC | pos        | 0.39            | 590.4761   |            |      | 4        |         | 0.18973                    | 0.53612 | 0.22                                    | 0.06  | 0.15  | 0.24     | 0.55  | 0.83  | 0.16827 | 0.67938 | -0.45                      | -0.65 | -0.26                    | -0.56 | -0.38 | -0.38    | -0.47 |   |   |   |         |   |   |   |   |       |   |   |   |   |
| RPpos_591.0764_10.5    | RP    | pos        | 10.5            | 591.0764   |            |      | 4        |         | 0.21320                    | 0.55580 | -0.17                                   | 0.12  | 0.16  | -0.04    | -0.13 | 0.32  | 0.23155 | 0.74823 | -0.53                      | 0.19  | -0.17                    | -0.31 | -0.55 | -0.57    | 0.40  |   |   |   |         |   |   |   |   |       |   |   |   |   |
| RPpos_591.2608_6.25    | RP    | pos        | 6.25            | 591.2608   |            |      | 4        |         | 0.51287                    | 0.78425 | -0.16                                   | 0.06  | 0.50  | -0.54    | 0.46  | 0.29  | 0.62229 | 0.93343 | 0.04                       | 0.53  | 0.31                     | -0.38 | 0.42  | -0.88    | 0.12  |   |   |   |         |   |   |   |   |       |   |   |   |   |
| RPpos_591.2916_10.05   | RP    | pos        | 10.05           | 591.2916   |            |      | 4        |         | 0.19865                    | 0.54311 | -0.70                                   | 0.31  | 0.13  | -0.13    | 0.13  | -0.78 | 0.59241 | 0.92667 | -0.22                      | 0.20  | -0.04                    | -0.52 | 0.42  | -0.17    | -1.13 |   |   |   |         |   |   |   |   |       |   |   |   |   |
| HILICpos_591.316_1.11  | HILIC | pos        | 1.11            | 591.3160   |            |      | 4        |         | 0.62099                    | 0.83901 | 0.18                                    | 0.02  | 0.48  | 0.33     | 0.16  | -0.15 | 0.09761 | 0.56834 | 0.32                       | 0.04  | 0.19                     | 0.33  | 0.36  | 0.51     | 0.63  |   |   |   |         |   |   |   |   |       |   |   |   |   |
| RPpos_591.3171_6.01    | RP    | pos        | 6.01            | 591.3171   |            |      | 4        |         | 0.20870                    | 0.55161 | 0.38                                    | 0.05  | 0.56  | 0.52     | 0.72  | 0.03  | 0.13275 | 0.62920 | 0.08                       | -0.08 | 0.06                     | 0.19  | 0.05  | 0.14     | -0.04 |   |   |   |         |   |   |   |   |       |   |   |   |   |
| RPneg_591.3175_8.51    | RP    | neg        | 8.51            | 591.3175   |            |      | 4        |         | 0.54130                    | 0.79862 | 0.28                                    | 0.06  | 0.64  | 0.50     | 0.24  | -0.23 | 0.05209 | 0.45441 | 0.37                       | 0.06  | 0.19                     | 0.38  | 0.51  | 0.60     | 0.60  |   |   |   |         |   |   |   |   |       |   |   |   |   |
| RPpos_591.3179_8.5     | RP    | pos        | 8.5             | 591.3179   |            |      | 4        |         | 0.70061                    | 0.87756 | 0.24                                    | -0.09 | 0.30  | 0.64     | 0.18  | -0.35 | 0.04720 | 0.43423 | 0.39                       | 0.02  | 0.29                     | 0.41  | 0.52  | 0.58     | 0.40  |   |   |   |         |   |   |   |   |       |   |   |   |   |
| RPpos_591.3181_6.08    | RP    | pos        | 6.08            | 591.3180   |            |      | 4        |         | 0.30891                    | 0.63749 | 0.34                                    | 0.10  | 0.78  | 0.63     | 0.23  | -0.12 | 0.09404 | 0.56141 | 0.25                       | 0.07  | 0.14                     | 0.34  | 0.34  | 0.26     | 0.26  |   |   |   |         |   |   |   |   |       |   |   |   |   |
| RPpos_591.32007_6.106  | RP    | pos        | 6.106           | 591.3201   |            |      | 4        |         | 0.15768                    | 0.50086 | 0.35                                    | 0.02  | 0.54  | 0.39     | 0.68  | 0.25  | 0.13038 | 0.62397 | 0.69                       | 0.14  | 0.61                     | 0.77  | 0.81  | 1.14     | 0.23  |   |   |   |         |   |   |   |   |       |   |   |   |   |
| RPpos_591.3483_10.18   | RP    | pos        | 10.18           | 591.3483   |            |      | 4        |         | 0.68009                    | 0.86708 | 0.07                                    | 0.12  | 0.63  | 0.07     | 0.10  | 0.83  | 0.23587 | 0.75375 | -0.17                      | -0.26 | -0.04                    | -0.13 | -0.05 | -0.30    | -0.31 |   |   |   |         |   |   |   |   |       |   |   |   |   |
| RPpos_591.3581_7.08    | RP    | pos        | 7.08            | 591.3581   |            |      | 4        |         | 0.58489                    | 0.82129 | -0.15                                   | -0.28 | 0.49  | -0.07    | -0.25 | 0.28  | 0.99973 | 0.99979 | -0.04                      | 0.04  | 0.17                     | 0.14  | -0.03 | -0.79    | -0.15 |   |   |   |         |   |   |   |   |       |   |   |   |   |
| RPpos_591.3598_5.39    | RP    | pos        | 5.39            | 591.3598   |            |      | 4        |         | 0.37250                    | 0.68840 | -0.26                                   | 0.01  | 0.70  | -0.23    | -0.36 | 0.32  | 0.00159 | 0.07599 | -0.52                      | -0.37 | -0.26                    | -0.64 | -0.20 | -0.09    | -0.52 |   |   |   |         |   |   |   |   |       |   |   |   |   |
| HILICpos_591.371_0.54  | HILIC | pos        | 0.54            | 591.3710   |            |      | 4        |         | 0.85715                    | 0.94640 | -0.09                                   | 0.05  | 1.10  | 0.08     | -0.24 | 0.18  | 0.60083 | 0.92810 | 0.18                       | -0.14 | 0.55                     | 0.16  | -0.26 | -0.13    | -0.34 |   |   |   |         |   |   |   |   |       |   |   |   |   |
| RPneg_591.38989_11.66  | RP    | neg        | 11.66           | 591.3899   |            |      | 4        |         | 0.28342                    | 0.61746 | 0.09                                    | 0.32  | 0.40  | 0.17     | 0.39  | -0.34 | 0.06479 | 0.49304 | 0.55                       | 0.41  | 0.62                     | 0.46  | 0.67  | 0.63     | 0.26  |   |   |   |         |   |   |   |   |       |   |   |   |   |
| HILICneg_591.3906_0.86 | HILIC | neg        | 0.86            | 591.3906   |            |      | 4        |         | 0.59287                    | 0.82533 | 0.04                                    | 0.14  | 0.17  | 0.04     | 0.76  | -0.40 | 0.07360 | 0.51614 | 0.55                       | 0.45  | 0.45                     | 0.58  | 0.69  | 0.51     | 0.47  |   |   |   |         |   |   |   |   |       |   |   |   |   |
| HILICneg_591.3909_0.81 | HILIC | neg        | 0.81            | 591.3909   |            |      | 4        |         | 0.21097                    | 0.55393 | 0.17                                    | 0.37  | 0.20  | 0.30     | 0.71  | -0.33 | 0.08634 | 0.54451 | 0.52                       | 0.54  | 0.55                     | 0.41  | 0.54  | 0.72     | 0.22  |   |   |   |         |   |   |   |   |       |   |   |   |   |
| RPneg_591.46112_11.085 | RP    | neg        | 11.085          | 591.4611   |            |      | 4        |         | 0.14063                    | 0.48056 | 0.27                                    | 0.05  | 0.22  | 0.47     | 0.45  | 0.62  | 0.34232 | 0.82739 | -0.32                      | -0.53 | -0.31                    | -0.32 | -0.11 | -0.33    | -0.24 |   |   |   |         |   |   |   |   |       |   |   |   |   |
| HILICneg_591.4617_0.39 | HILIC | neg        | 0.39            | 591.4617   |            |      | 4        |         | 0.02483                    | 0.27612 | 0.49                                    | 0.17  | 0.27  | 0.60     | 1.06  | 0.25  | 0.29543 | 0.79878 | -0.34                      | -0.41 | -0.34                    | -0.39 | -0.26 | -0.28    | -0.31 |   |   |   |         |   |   |   |   |       |   |   |   |   |
| RPpos_591.462_11.09    | RP    | pos        | 11.09           | 591.4620   |            |      | 4        |         | 0.13085                    | 0.46781 | 0.41                                    | 0.09  | 0.38  | 0.39     | 0.83  | 0.22  | 0.45090 | 0.88221 | -0.21                      | -0.16 | -0.23                    | -0.22 | -0.19 | -0.09    | -0.32 |   |   |   |         |   |   |   |   |       |   |   |   |   |
| RPneg_591.46277_10.932 | RP    | neg        | 10.932          | 591.4628   |            |      | 4        |         | 0.10023                    | 0.43172 | 0.53                                    | 0.09  | 0.45  | 0.62     | 0.76  | 0.34  | 0.35922 | 0.83448 | -0.31                      | -0.50 | -0.40                    | -0.40 | -0.08 | -0.20    | -0.30 |   |   |   |         |   |   |   |   |       |   |   |   |   |
| RPneg_591.46344_11.259 | RP    | neg        | 11.259          | 591.4634   |            |      | 4        |         | 0.10134                    | 0.43366 | 0.40                                    | 0.15  | 0.48  | 0.65     | 0.59  | 0.35  | 0.45711 | 0.88438 | -0.24                      | -0.37 | -0.33                    | -0.19 | -0.03 | -0.21    | -0.35 |   |   |   |         |   |   |   |   |       |   |   |   |   |
| RPneg_591.46472_11.168 | RP    | neg        | 11.168          | 591.4647   |            |      | 4        |         | 0.11627                    | 0.45208 | 0.24                                    | 0.08  | 0.27  | 0.37     | 0.45  | 0.49  | 0.28726 | 0.73407 | -0.36                      | -0.41 | -0.35                    | -0.43 | -0.19 | -0.31    | -0.33 |   |   |   |         |   |   |   |   |       |   |   |   |   |
| RPpos_591.6653_10.97   | RP    | pos        | 10.97           | 591.6653   |            |      | 4        |         | 0.03972                    | 0.31975 | 0.33                                    | -0.01 | 0.48  | 0.40     | 0.47  | 0.94  | 0.29447 | 0.80175 | -0.33                      | -0.26 | -0.43                    | -0.30 | -0.15 | -0.18    | -0.29 |   |   |   |         |   |   |   |   |       |   |   |   |   |
| RPpos_592.0001_10.97   | RP    | pos        | 10.97           | 592.0001   |            |      | 4        |         | 0.59169                    | 0.82484 | -0.15                                   | -0.33 | 0.67  | -0.14    | -0.08 | 0.45  | 0.49825 | 0.90072 | -0.19                      | -0.18 | -0.01                    | -0.12 | 0.00  | -0.47    | -0.28 |   |   |   |         |   |   |   |   |       |   |   |   |   |
| RPneg_592.2635_10.233  | RP    | neg        | 10.233          | 592.2636   |            |      | 4        |         | 0.86853                    | 0.95065 | -0.09                                   | -0.26 | 1.06  | -0.04    | -0.12 | 0.39  | 0.74346 | 0.96041 | -0.12                      | -0.20 | -0.01                    | -0.07 | 0.16  | -0.45    | -0.05 |   |   |   |         |   |   |   |   |       |   |   |   |   |
| HILICneg_592.2654_1.88 | HILIC | neg        | 1.88            | 592.2654   |            |      | 4        |         | 0.46696                    | 0.75547 | -0.20                                   | -0.19 | -0.05 | -0.32    | 0.30  | 0.58  | 0.88528 | 0.98281 | 0.05                       | -0.12 | -0.12                    | 0.12  | 0.11  | 0.36     | 0.13  |   |   |   |         |   |   |   |   |       |   |   |   |   |
| RPneg_592.30743_12.649 | RP    | neg        | 12.649          | 592.3074   |            |      | 4        |         | 0.11330                    | 0.44915 | -0.39                                   | -0.36 | -0.17 | -0.57    | 0.13  | -0.25 | 0.86192 | 0.97982 | 0.24                       | -0.26 | 0.38                     | 0.29  | 0.42  | 0.31     | 0.18  |   |   |   |         |   |   |   |   |       |   |   |   |   |
| RPpos_592.308_11.06    | RP    | pos        | 11.06           | 592.3080   |            |      | 4        |         | 0.78179                    | 0.91447 | -0.08                                   | 0.40  | 0.25  | -0.32    | 0.32  | -0.02 | 0.45969 | 0.88511 | 0.10                       | 0.05  | 0.17                     | 0.05  | 0.15  | 0.17     | -0.01 |   |   |   |         |   |   |   |   |       |   |   |   |   |
| RPneg_592.32202_10.653 | RP    | neg        | 10.653          | 592.3220   |            |      | 4        |         | 0.41474                    | 0.71918 | -0.22                                   | -0.07 | 0.50  | -0.12    | -0.23 | 0.19  | 0.48591 | 0.89761 | -0.24                      | 0.00  | -0.19                    | -0.23 | 0.03  | -0.42    | -0.35 |   |   |   |         |   |   |   |   |       |   |   |   |   |
| RPpos_592.3314_10.97   | RP    | pos        | 10.97           | 592.3314   |            |      | 4        |         | 0.02541                    | 0.27880 | -0.40                                   | -0.03 | -0.14 | -0.27    | -0.26 | -0.36 | 0.82768 | 0.97409 | 0.11                       | 0.27  | 0.30                     | 0.11  | 0.01  | 0.06     | -0.06 |   |   |   |         |   |   |   |   |       |   |   |   |   |
| RPpos_592.3362_10.37   | RP    | pos        | 10.37           | 592.3362   |            |      | 4        |         | 0.79280                    | 0.91943 | -0.09                                   | -0.34 | 0.98  | -0.12    | -0.17 | 0.78  | 0.54655 | 0.91644 | -0.18                      | -0.13 | -0.03                    | -0.08 | -0.19 | -0.39    | -0.23 |   |   |   |         |   |   |   |   |       |   |   |   |   |
| RPpos_592.339_10.46    | RP    | pos        | 10.46           | 592.3390   |            |      | 4        |         | 0.00343                    | 0.11973 | -0.36                                   | -0.14 | -0.23 | -0.26    | 0.11  | -0.35 | 0.87458 | 0.98203 | 0.16                       | 0.41  | 0.14                     | 0.09  | 0.19  | 0.18     | -0.13 |   |   |   |         |   |   |   |   |       |   |   |   |   |
| RPneg_592.339_13.027   | RP    | neg        | 13.027          | 592.3431   |            |      | 4        |         | 0.10683                    | 0.44022 | -0.19                                   | -0.31 | -0.10 | -0.12    | 0.40  | -0.36 | 0.83189 | 0.97501 | 0.03                       | -0.50 | -0.21                    | 0.35  | 0.30  | 0.43     | 0.01  |   |   |   |         |   |   |   |   |       |   |   |   |   |
| RPpos_592.34314_5.58   | RP    | pos        | 5.58            | 592.3431   |            |      | 4        |         | 0.17457                    | 0.51994 | -0.30                                   | 0.20  | -0.51 | -0.07    | 0.09  | -1.01 | 0.48826 | 0.89812 | 0.16                       | 0.03  | 0.19                     | -0.09 | 0.35  | 0.23     | 0.19  |   |   |   |         |   |   |   |   |       |   |   |   |   |
| RPneg_592.3547_10.596  | RP    | neg        | 10.596          | 592.3547   |            |      | 4        |         | 0.29230                    | 0.62495 | -0.27                                   | 0.51  | -0.16 | 0.00     | -0.18 | -0.18 | 0.06612 | 0.49650 | -0.38                      | -0.31 | -0.34                    | -0.79 | -0.51 | 0.30     | -0.37 |   |   |   |         |   |   |   |   |       |   |   |   |   |
| RPneg_592.3630_10.712  | RP    | neg        | 10.712          | 592.3630   |            |      | 4        |         | 0.02915                    | 0.29025 | -0.41                                   | -0.09 | -0.16 | -0.21    | -0.15 | -0.43 | 0.25443 | 0.76933 | -0.36                      | -0.06 | 0.01                     | -0.07 | 0.01  | 0.00     | -0.24 |   |   |   |         |   |   |   |   |       |   |   |   |   |
| HILICneg_592.3631_1.24 | HILIC | neg        | 1.24            | 592.3631   |            |      | 4        |         | 0.02023                    | 0.25817 | -0.44                                   | -0.12 | -0.17 | -0.29    | -0.16 | -0.40 | 0.24799 | 0.76442 | -0.07                      | 0.03  | 0.00                     | -0.06 | 0.02  | -0.05    | -0.30 |   |   |   |         |   |   |   |   |       |   |   |   |   |
| HILICpos_592.3675_5    | HILIC | pos        | 5               | 592.3675   |            |      | 4        |         | 0.00298                    | 0.11249 | -0.54                                   | -0.19 | -0.33 | -0.48    |       |       |         |         |                            |       |                          |       |       |          |       |   |   |   |         |   |   |   |   |       |   |   |   |   |



| Feature_ID             | Mode | Ionization | Average_Rt.min. | Average_Mz | Metabolite                                           | MSMS | ID_Level | HMDB_ID | IV-Alcohol self-administration (IV-ASA) |         |       |       |       |       |                       |       |         |         |       |       |                            | IV-Alcohol clamp (IV-AC) |       |          |       |          |         |         |                       |       |       |       |       |         |         |         |        |       |       |       |       |       |       |
|------------------------|------|------------|-----------------|------------|------------------------------------------------------|------|----------|---------|-----------------------------------------|---------|-------|-------|-------|-------|-----------------------|-------|---------|---------|-------|-------|----------------------------|--------------------------|-------|----------|-------|----------|---------|---------|-----------------------|-------|-------|-------|-------|---------|---------|---------|--------|-------|-------|-------|-------|-------|-------|
|                        |      |            |                 |            |                                                      |      |          |         | Area Under the Curve (AUC)              |         |       |       |       |       | IV-Ghrelin or Placebo |       |         |         |       |       | Area Under the Curve (AUC) |                          |       | Baseline |       |          | Post-LD |         | IV-Ghrelin or Placebo |       |       | IV-AC |       |         | Post-AC |         | BrAc=0 |       |       |       |       |       |       |
|                        |      |            |                 |            |                                                      |      |          |         | p                                       | q       | d     | d     | d     | d     | d                     | d     | d       | d       | d     | d     | p                          | q                        | d     | d        | d     | d        | d       | d       | d                     | d     | d     | d     | d     | d       | d       | d       | d      | d     |       |       |       |       |       |
|                        |      |            |                 |            |                                                      |      |          |         |                                         |         |       |       |       |       |                       |       |         |         |       |       |                            |                          |       |          |       |          |         |         |                       |       |       |       |       |         |         |         |        |       |       |       |       |       |       |
| RPneg_593.47937_11.463 | RP   | neg        | 11.463          | 593.4794   |                                                      |      | 4        |         | 0.07688                                 | 0.39786 | 0.21  | 0.05  | 0.35  | 0.15  | 0.49                  | 0.40  | 0.50431 | 0.90327 | -0.23 | -0.17 | -0.22                      | -0.25                    | -0.07 | -0.26    | -0.17 | 0.40084  | 0.85821 | -0.24   | -0.22                 | -0.20 | -0.28 | -0.18 | -0.22 | -0.26   |         |         |        |       |       |       |       |       |       |
| HLICneg_593.4795_0.39  | HLIC | neg        | 0.39            | 593.4795   |                                                      |      | 4        |         | 0.02114                                 | 0.26233 | 0.44  | 0.15  | 0.23  | 0.34  | 1.17                  | 0.22  | 0.75465 | 0.96233 | 0.06  | -0.06 | 0.14                       | 0.16                     | 0.47  | -0.21    | -0.08 | 0.09012  | 0.41837 | 0.21    | 0.42                  | 0.49  | 0.09  | 0.33  | 0.26  |         |         |         |        |       |       |       |       |       |       |
| RPneg_593.4798_11.388  | RP   | neg        | 11.388          | 593.4798   |                                                      |      | 4        |         | 0.09663                                 | 0.42441 | 0.20  | 0.07  | 0.19  | 0.21  | 0.51                  | 0.10  | 0.40576 | 0.86019 | -0.25 | -0.21 | -0.27                      | -0.25                    | 0.12  | -0.37    | -0.36 | 0.77119  | 0.91237 | 0.10    | -0.19                 | 0.03  | 0.12  | 0.07  | 0.10  | 0.38649 | 0.83536 | -0.25   | 0.03   | -0.01 | -0.16 | -0.46 | -0.17 |       |       |
| RPpos_593.651_10.18    | RP   | pos        | 10.18           | 593.6510   |                                                      |      | 4        |         | 0.57874                                 | 0.81765 | 0.10  | 0.01  | 0.52  | 0.20  | 0.07                  | 0.37  | 0.38939 | 0.97821 | -0.17 | -0.14 | -0.09                      | -0.17                    | 0.10  | -0.35    | -0.33 | 0.71020  | 0.88177 | -0.12   | -0.29                 | 0.67  | -0.10 | -0.02 | 0.25  | 0.84000 | 0.97628 | -0.09   | -0.31  | 0.04  | -0.05 | 0.14  | -0.33 | 0.10  |       |
| RPpos_593.9844_10.97   | RP   | pos        | 10.97           | 593.9844   |                                                      |      | 4        |         | 0.56546                                 | 0.81182 | -0.21 | 0.09  | 0.86  | 0.07  | 0.62                  | -0.09 | 0.93741 | 0.99028 | -0.08 | 0.73  | 0.26                       | 0.39                     | 0.30  | -0.42    | -0.91 | 0.56938  | 0.94838 | 0.12    | 0.10                  | 0.13  | 0.11  | 0.23  | 0.09  | 0.06    | 0.68358 | 0.94838 | 0.12   | 0.10  | 0.13  | 0.11  | 0.23  | 0.09  | 0.06  |
| RPneg_594.17615_10.002 | RP   | neg        | 10.002          | 594.1762   |                                                      |      | 4        |         | 0.09117                                 | 0.41995 | 0.31  | 0.03  | 0.88  | 0.28  | 0.50                  | 0.45  | 0.37188 | 0.84160 | 0.15  | -0.18 | 0.37                       | 0.26                     | 0.22  | 0.08     | -0.28 | 0.57495  | 0.81611 | -0.03   | 0.10                  | 0.14  | 0.04  | 0.73  | 0.43  | 0.53756 | 0.91463 | 0.26    | 0.08   | 0.28  | 0.31  | 0.36  | 0.45  | -0.21 |       |
| RPneg_594.25781_8.683  | RP   | neg        | 8.683           | 594.2578   |                                                      |      | 4        |         | 0.04138                                 | 0.32531 | 0.37  | -0.11 | 0.86  | 0.37  | 0.62                  | 0.45  | 0.00000 | 0.00000 | 0.59  | -0.22 | 0.77                       | 1.18                     | 0.76  | 0.46     | -0.27 | 0.10392  | 0.49227 | -0.07   | -0.22                 | 0.11  | -0.16 | 0.52  | 0.01  | 0.37974 | 0.84642 | 0.31    | 0.31   | -0.03 | 0.57  | 0.52  | 0.22  | 0.18  |       |
| RPneg_594.28113_10.392 | RP   | neg        | 10.392          | 594.2811   |                                                      |      | 4        |         | 0.03852                                 | 0.31643 | -0.51 | -0.19 | -0.19 | -0.47 | -0.51                 | -0.20 | 0.62989 | 0.93531 | -0.09 | -0.15 | 0.16                       | 0.01                     | 0.34  | -0.32    | -0.32 | 0.44610  | 0.74171 | -0.07   | -0.22                 | 0.11  | -0.16 | 0.52  | 0.01  | 0.62989 | 0.93531 | -0.09   | -0.15  | 0.16  | 0.01  | 0.34  | -0.32 | -0.32 |       |
| RPneg_594.28271_10.492 | RP   | neg        | 10.492          | 594.2827   |                                                      |      | 4        |         | 0.01564                                 | 0.23296 | -0.57 | -0.14 | -0.27 | -0.56 | -0.43                 | -0.21 | 0.16437 | 0.67450 | -0.25 | -0.17 | -0.23                      | -0.27                    | -0.12 | -0.38    | -0.13 | 0.16990  | 0.51471 | -0.37   | 0.12                  | -0.06 | -0.26 | -0.20 | -0.35 | 0.69758 | 0.95114 | 0.03    | 0.02   | 0.01  | 0.18  | 0.10  | -0.07 | -0.06 |       |
| RPneg_594.30286_10.036 | RP   | neg        | 10.036          | 594.3029   |                                                      |      | 4        |         | 0.00474                                 | 0.13733 | -0.22 | -0.04 | -0.15 | -0.09 | 0.24                  | -0.38 | 0.74214 | 0.96000 | 0.22  | 0.43  | 0.32                       | 0.12                     | 0.31  | 0.18     | -0.06 | 0.03920  | 0.29417 | -0.44   | -0.18                 | -0.14 | -0.40 | -0.22 | -0.43 | 0.92426 | 0.98905 | 0.06    | 0.18   | 0.00  | -0.03 | 0.25  | 0.12  | -0.13 |       |
| RPneg_594.33728_10.738 | RP   | neg        | 10.738          | 594.3373   |                                                      |      | 4        |         | 0.78212                                 | 0.91897 | 0.11  | -0.19 | 0.03  | 0.63  | 0.70                  | 0.01  | 0.77221 | 0.96458 | -0.04 | 0.01  | -0.05                      | -0.06                    | 0.07  | 0.38     | 0.07  | 0.550874 | 0.94441 | 0.08    | 0.37                  | 0.38  | 0.35  | 0.08  | 0.28  | 0.48833 | 0.90072 | -0.31   | 0.14   | 0.31  | 0.00  | -0.48 | 0.70  | 0.48  |       |
| RPpos_594.3547_10.62   | RP   | pos        | 10.62           | 594.3547   |                                                      |      | 4        |         | 0.03342                                 | 0.30338 | -0.44 | 0.20  | -0.08 | -0.30 | -0.27                 | -0.36 | 0.49828 | 0.90072 | -0.08 | -0.68 | -0.32                      | -0.08                    | 0.20  | 0.28     | -0.24 | 0.09521  | 0.42498 | -0.26   | 0.46                  | -0.17 | 0.63  | -0.46 | 0.00  | 0.19960 | 0.71539 | -0.39   | 0.02   | -0.47 | -0.75 | -0.09 | -0.24 | -0.26 |       |
| RPneg_594.37842_10.86  | RP   | neg        | 10.86           | 594.3784   |                                                      |      | 4        |         | 0.45872                                 | 0.75022 | -0.10 | -0.03 | 0.07  | -0.12 | 0.16                  | -0.03 | 0.19564 | 0.71015 | 0.33  | 0.41  | 0.47                       | 0.37                     | 0.44  | 0.30     | 0.10  | 0.25119  | 0.59020 | -0.14   | -0.12                 | 0.04  | -0.20 | 0.09  | -0.17 | 0.10826 | 0.58740 | 0.49    | 0.38   | 0.40  | 0.94  | 0.84  | 0.34  | -0.21 |       |
| RPpos_595.0874_10.57   | RP   | pos        | 10.57           | 595.0874   |                                                      |      | 4        |         | 0.57232                                 | 0.81525 | 0.17  | -0.10 | 0.21  | 0.09  | 1.51                  | 0.15  | 0.10691 | 0.58505 | -0.45 | 0.48  | -0.17                      | -0.84                    | -0.42 | -0.47    | -0.27 | 0.23861  | 0.58019 | 0.45    | 0.26                  | 0.94  | 0.45  | 1.12  | -0.24 | 0.21340 | 0.73018 | 1.02    | 0.15   | 0.75  | 1.53  | 1.34  | 1.46  | 0.40  |       |
| RPpos_595.107_10.3     | RP   | pos        | 10.3            | 595.107    |                                                      |      | 4        |         | 0.77037                                 | 0.90988 | 0.07  | -0.21 | 0.76  | 0.05  | 0.19                  | -0.13 | 0.03538 | 0.38403 | 0.71  | 0.11  | 0.54                       | 0.88                     | 0.91  | 0.89     | 0.66  | 0.04695  | 0.33960 | 0.24    | 0.12                  | 0.39  | 0.32  | 0.23  | 0.32  | 0.91929 | 0.98860 | -0.02   | -0.18  | -0.09 | -0.03 | 0.03  | 0.27  | -0.17 |       |
| RPneg_595.1482_8.78    | RP   | neg        | 8.78            | 595.1482   |                                                      |      | 4        |         | 0.26772                                 | 0.60392 | 0.68  | 0.28  | 1.14  | 0.67  | 1.50                  | -0.28 | 0.16167 | 0.67144 | 0.91  | 0.15  | 0.84                       | 1.51                     | 1.03  | 1.05     | 0.47  | 0.53005  | 0.79344 | 0.23    | 0.92                  | -0.27 | 0.10  | 0.74  | 0.73  | 0.90714 | 0.96968 | 0.07    | 0.43   | 0.89  | -0.19 | -0.66 | -0.05 | 0.69  |       |
| RPpos_595.1822_11.099  | RP   | pos        | 11.099          | 595.1822   |                                                      |      | 4        |         | 0.00947                                 | 0.18975 | 0.32  | 0.04  | 0.97  | 0.23  | 0.03                  | 0.25  | 0.24586 | 0.76371 | -0.36 | -0.68 | -0.25                      | -0.44                    | -0.15 | -0.25    | -0.44 | 0.00949  | 0.33877 | 0.18    | 0.04                  | 0.21  | 0.09  | 0.60  | -0.22 | 0.39155 | 0.85207 | 0.28    | 0.58   | 0.20  | 0.10  | 0.70  | 0.20  | -0.08 |       |
| RPneg_595.1971_11.721  | RP   | neg        | 11.721          | 595.1971   |                                                      |      | 4        |         | 0.09842                                 | 0.42894 | 0.21  | 0.00  | 0.38  | 0.08  | 0.58                  | 0.36  | 0.85599 | 0.97868 | 0.01  | 0.03  | 0.35                       | -0.27                    | 0.37  | -0.07    | -0.26 | 0.06607  | 0.37817 | 0.19    | 0.02                  | 0.25  | 0.21  | 0.37  | 0.56  | 0.33525 | 0.82321 | -0.29   | -0.30  | -0.34 | -0.25 | -0.19 | -0.24 | -0.38 |       |
| RPpos_595.1971_11.721  | RP   | pos        | 11.721          | 595.1971   |                                                      |      | 4        |         | 0.10139                                 | 0.43366 | 0.37  | 0.20  | 0.14  | 0.12  | 0.95                  | 1.06  | 0.56020 | 0.91988 | -0.19 | 0.21  | -0.03                      | -0.20                    | -0.04 | -0.33    | -0.40 | 0.49410  | 0.77322 | -0.18   | 0.57                  | -0.14 | -0.24 | -0.10 | 0.00  | 0.28264 | 0.79142 | 0.58    | 0.92   | 0.07  | 0.83  | 0.36  | 0.53  | 0.24  |       |
| RPneg_595.2571_1.27    | HLIC | neg        | 1.27            | 595.2571   |                                                      |      | 4        |         | 0.70449                                 | 0.87921 | -0.07 | -0.23 | 0.20  | 0.05  | -0.05                 | 1.07  | 0.14964 | 0.65435 | -0.56 | -0.18 | -0.36                      | 0.03                     | -0.21 | -1.20    | 0.82  | 0.00015  | 0.02351 | 0.82    | 0.39                  | 1.07  | 1.59  | 0.71  | 0.78  | 0.54120 | 0.91464 | 0.27    | 0.25   | 0.30  | 0.19  | 0.20  | 0.50  | 0.12  |       |
| HLICneg_595.2879_4.75  | HLIC | neg        | 4.75            | 595.2879   |                                                      |      | 4        |         | 0.00009                                 | 0.01730 | 0.74  | 0.05  | 1.14  | 0.78  | 1.07                  | 0.81  | 0.00021 | 0.02067 | 0.40  | -0.15 | 0.58                       | 0.73                     | 0.52  | 0.27     | -0.45 | 0.00009  | 0.01730 | 0.74    | 0.05                  | 1.14  | 0.78  | 1.07  | 0.81  | 0.00021 | 0.02067 | 0.40    | -0.15  | 0.58  | 0.73  | 0.52  | 0.27  | -0.45 |       |
| HLICpos_595.2879_4.75  | HLIC | pos        | 4.75            | 595.2879   | adduct of chenodeoxycholic acid<br>glycine conjugate |      | 4        |         | 0.01559                                 | 0.23292 | -0.41 | 0.05  | -0.10 | -0.25 | -0.36                 | -0.30 | 0.86464 | 0.97994 | 0.14  | 0.29  | 0.29                       | 0.20                     | 0.09  | 0.06     | -0.19 | 0.82     | 0.01559 | 0.23292 | -0.41                 | -0.14 | -0.23 | -0.08 | -0.38 | -0.29   | 0.01288 | 0.24341 | -0.24  | 0.04  | -0.35 | -0.05 | -0.23 | -0.19 | -0.42 |
| RPneg_595.28802_15.476 | RP   | neg        | 15.476          | 595.2880   |                                                      |      | 4        |         | 0.41862                                 | 0.72219 | -0.12 | -0.14 | -0.13 | 0.01  | -0.05                 | 0.30  | 0.25042 | 0.76679 | -0.12 | -0.10 | -0.17                      | -0.23                    | -0.10 | -0.06    | 0.00  | 0.58540  | 0.94734 | -0.08   | -0.35                 | 0.93  | 0.07  | -0.09 | 0.61  | 0.48888 | 0.89883 | -0.19   | -0.18  | 0.14  | -0.24 | -0.14 | -0.26 | -0.22 |       |
| RPpos_595.3073_0.39    | HLIC | pos        | 0.39            | 595.3073   |                                                      |      | 4        |         | 0.65919                                 | 0.85739 | 0.08  | -0.13 | 0.46  | 0.12  | -0.01                 | 0.37  | 0.26305 | 0.77551 | -0.35 | -0.11 | -0.13                      | -0.43                    | -0.25 | -0.63    | -0.18 | 0.65919  | 0.85739 | 0.08    | -0.13                 | 0.46  | 0.12  | -0.01 | 0.37  | 0.26305 | 0.77551 | -0.35   | -0.11  | -0.13 | -0.43 | -0.25 | -0.63 | -0.18 |       |
| RPneg_595.3471_1.09    | HLIC | neg        | 1.09            | 595.3471   |                                                      |      | 4        |         | 0.25510                                 | 0.59020 | -0.14 | -0.12 | 0.04  | -0.20 | 0.09                  | -0.17 | 0.10826 | 0.58740 | 0.49  | 0.38  | 0.40                       | 0.94                     | 0.84  | 0.34     | -0.21 | 0.57232  | 0.81525 | 0.17    | -0.10                 | 0.21  | 0.09  | 1.51  | 0.15  | 0.10691 | 0.58505 | -0.45   | 0.48   | -0.17 | -0.84 | -0.42 | -0.47 | -0.27 |       |
| RPpos_595.3477_8.65    | RP   | pos        | 8.65            | 595.3477   |                                                      |      | 4        |         | 0.57232                                 | 0.81525 | 0.17  | -0.10 | 0.21  | 0.09  | 1.51                  | 0.15  | 0.10691 | 0.58505 | -0.45 | 0.48  | -0.17                      | -0.84                    | -0.42 | -0.47    | -0.27 | 0.23861  | 0.58019 | 0.45    | 0.26                  | 0.94  | 0.45  | 1.12  | -0.24 | 0.21340 | 0.73018 | 1.02    | 0.15   | 0.75  | 1.53  | 1.34  | 1.46  | 0.40  |       |
| RPneg_59               |      |            |                 |            |                                                      |      |          |         |                                         |         |       |       |       |       |                       |       |         |         |       |       |                            |                          |       |          |       |          |         |         |                       |       |       |       |       |         |         |         |        |       |       |       |       |       |       |

| Feature_ID             | Mode | Ionization | Average_Rt.min. | Average_Mz | Metabolite | MSMS        | ID_Level | HMDB_ID | IV-Alcohol self-administration (IV-ASA) |         |       |                       |       |       |       |                       |         |         |                       |       |       |       | IV-Alcohol clamp (IV-AC)   |       |       |                       |   |   |   |                       |   |   |                       |   |   |   |
|------------------------|------|------------|-----------------|------------|------------|-------------|----------|---------|-----------------------------------------|---------|-------|-----------------------|-------|-------|-------|-----------------------|---------|---------|-----------------------|-------|-------|-------|----------------------------|-------|-------|-----------------------|---|---|---|-----------------------|---|---|-----------------------|---|---|---|
|                        |      |            |                 |            |            |             |          |         | Area Under the Curve (AUC)              |         |       |                       |       |       |       | IV-Ghrelin or Placebo |         |         |                       |       |       |       | Area Under the Curve (AUC) |       |       |                       |   |   |   | IV-Ghrelin or Placebo |   |   |                       |   |   |   |
|                        |      |            |                 |            |            |             |          |         | Baseline                                |         |       | IV-Ghrelin or Placebo |       |       |       | Baseline              |         |         | IV-Ghrelin or Placebo |       |       |       | Baseline                   |       |       | IV-Ghrelin or Placebo |   |   |   | Baseline              |   |   | IV-Ghrelin or Placebo |   |   |   |
|                        |      |            |                 |            |            |             |          |         | p                                       | q       | d     | d                     | d     | d     | d     | p                     | q       | d       | d                     | d     | d     | d     | p                          | q     | d     | d                     | d | d | d | p                     | q | d | d                     | d | d | d |
| RPneg_599.25024_8.385  | RP   | neg        | 8.385           | 599.2502   |            |             | 4        |         | 0.35513                                 | 0.67440 | 0.40  | 0.74                  | 0.47  | 0.35  | 0.46  | -0.08                 | 0.08149 | 0.53405 | 1.07                  | 1.74  | 1.20  | 1.15  | 0.72                       | 0.74  | -0.13 |                       |   |   |   |                       |   |   |                       |   |   |   |
| RPneg_599.25067_7.78   | RP   | neg        | 7.78            | 599.2507   |            |             | 4        |         | 0.26752                                 | 0.60371 | 0.44  | 0.69                  | 0.46  | 0.41  | 0.57  | -0.17                 | 0.12459 | 0.61515 | 0.95                  | 1.75  | 1.53  | 1.04  | 0.90                       | 0.60  | -0.26 |                       |   |   |   |                       |   |   |                       |   |   |   |
| RPneg_599.2868_11.755  | RP   | neg        | 11.755          | 599.2868   |            |             | 4        |         | 0.87494                                 | 0.95313 | 0.28  | 0.59                  | 0.01  | 0.30  | 0.56  | -0.12                 | 0.21544 | 0.73179 | 0.65                  | 0.81  | 0.53  | 0.66  | 0.62                       | 0.32  | -0.35 |                       |   |   |   |                       |   |   |                       |   |   |   |
| RPpos_599.302_11.4     | RP   | pos        | 11.4            | 599.3020   |            |             | 4        |         | 0.96011                                 | 0.98597 | 0.01  | -0.13                 | 0.92  | 0.10  | -0.12 | 0.50                  | 0.53027 | 0.91205 | -0.20                 | -0.28 | -0.21 | 0.24  | -0.32                      | -0.37 | -0.14 |                       |   |   |   |                       |   |   |                       |   |   |   |
| HLICneg_599.3211_4.71  | HLIC | neg        | 4.71            | 599.3211   |            |             | 4        |         | 0.23950                                 | 0.63685 | -0.17 | 0.25                  | 0.04  | -0.29 | 0.13  | -0.44                 | 0.77298 | 0.96458 | -0.07                 | -0.15 | 0.20  | -0.02 | -0.56                      | -0.13 | -0.45 |                       |   |   |   |                       |   |   |                       |   |   |   |
| RPpos_599.3263_10.81   | RP   | pos        | 10.81           | 599.3263   |            |             | 4        |         | 0.64824                                 | 0.85134 | -0.16 | -0.15                 | 0.86  | -0.13 | -0.19 | 0.37                  | 0.44855 | 0.98123 | -0.25                 | 0.37  | -0.08 | 0.12  | 0.04                       | -0.08 | -0.49 |                       |   |   |   |                       |   |   |                       |   |   |   |
| HLICpos_599.3791_0.65  | HLIC | pos        | 0.65            | 599.3791   |            |             | 4        |         | 0.34672                                 | 0.66762 | -0.32 | 0.20                  | 0.74  | -0.54 | -0.08 | 0.33                  | 0.06198 | 0.48472 | -0.26                 | -0.14 | -0.12 | -0.45 | -0.05                      | 0.01  | -0.38 |                       |   |   |   |                       |   |   |                       |   |   |   |
| HLICneg_599.3798_0.72  | HLIC | pos        | 0.72            | 599.3798   |            |             | 4        |         | 0.50112                                 | 0.77681 | -0.22 | 0.13                  | -0.08 | -0.13 | 0.82  | 0.42                  | 0.63668 | 0.93602 | -0.05                 | -0.21 | 0.19  | -0.09 | 0.21                       | -0.08 | -0.30 |                       |   |   |   |                       |   |   |                       |   |   |   |
| RPpos_599.4229_10.49   | RP   | pos        | 10.49           | 599.4229   |            |             | 4        |         | 0.29555                                 | 0.62685 | -0.20 | 0.31                  | 0.08  | -0.02 | -0.13 | 0.26                  | 0.48856 | 0.89823 | -0.61                 | -0.01 | -0.30 | 0.06  | -0.31                      | -0.72 | 0.46  |                       |   |   |   |                       |   |   |                       |   |   |   |
| RPpos_599.4271_12.21   | RP   | pos        | 12.21           | 599.4271   |            |             | 4        |         | 0.53366                                 | 0.79545 | -0.23 | 0.04                  | -0.06 | -0.38 | 0.26  | -0.16                 | 0.35679 | 0.83402 | 0.21                  | 0.30  | 0.18  | -0.09 | 0.28                       | 0.47  | -0.08 |                       |   |   |   |                       |   |   |                       |   |   |   |
| RPpos_599.4354_10.9    | RP   | pos        | 10.9            | 599.4354   |            | no autoMSMS | 4        |         | 0.00038                                 | 0.03616 | 1.44  | -0.10                 | 0.86  | 1.18  | 2.33  | 0.09                  | 0.64598 | 0.93835 | -0.18                 | -0.40 | 0.15  | -0.27 | -0.08                      | -0.31 | -0.10 |                       |   |   |   |                       |   |   |                       |   |   |   |
| RPpos_599.4464_11.35   | RP   | pos        | 11.35           | 599.4464   |            |             | 4        |         | 0.17744                                 | 0.52334 | -0.23 | 0.06                  | 0.03  | -0.17 | 0.01  | -0.59                 | 0.26325 | 0.77574 | 0.31                  | 0.21  | 0.57  | 0.30  | 0.22                       | 0.34  | 0.05  |                       |   |   |   |                       |   |   |                       |   |   |   |
| RPpos_599.5038_13.98   | RP   | pos        | 13.98           | 599.5038   |            |             | 4        |         | 0.81335                                 | 0.92887 | 0.07  | 0.18                  | 0.19  | -0.06 | 0.30  | 0.02                  | 0.33037 | 0.82055 | -0.31                 | -0.43 | -0.18 | -0.36 | -0.36                      | -0.28 | -0.30 |                       |   |   |   |                       |   |   |                       |   |   |   |
| RPneg_600.20111_10.146 | RP   | neg        | 10.146          | 600.2011   |            |             | 4        |         | 0.64769                                 | 0.85111 | 0.14  | 0.56                  | 0.48  | 0.40  | 0.72  | 0.79                  | 0.22142 | 0.73820 | 0.84                  | 0.19  | 0.58  | 0.87  | 0.78                       | 0.57  | 0.07  |                       |   |   |   |                       |   |   |                       |   |   |   |
| HLICneg_600.2556_1.07  | HLIC | neg        | 1.07            | 600.2556   |            |             | 4        |         | 0.00026                                 | 0.03071 | 0.61  | 0.13                  | 1.01  | 0.47  | 0.80  | 0.61                  | 0.00317 | 0.11328 | 0.57                  | -0.08 | 1.05  | 0.67  | 0.65                       | 0.31  | -0.33 |                       |   |   |   |                       |   |   |                       |   |   |   |
| RPneg_600.28467_5.572  | RP   | neg        | 5.572           | 600.2847   |            |             | 4        |         | 0.53216                                 | 0.79455 | -0.05 | -0.04                 | -0.03 | -0.09 | 0.00  | 0.22                  | 0.59087 | 0.92655 | -0.01                 | -0.03 | -0.01 | -0.05 | 0.01                       | 0.03  | 0.01  |                       |   |   |   |                       |   |   |                       |   |   |   |
| RPpos_600.3402_8.4     | RP   | pos        | 8.4             | 600.3402   |            |             | 4        |         | 0.41827                                 | 0.72206 | 0.23  | -0.28                 | 0.93  | 0.19  | 0.28  | 0.11                  | 0.63621 | 0.93594 | 0.11                  | -0.11 | 0.11  | 0.05  | 0.50                       | 0.50  | -0.16 | 0.09                  |   |   |   |                       |   |   |                       |   |   |   |
| RPpos_600.4037_10.96   | RP   | pos        | 10.96           | 600.4037   |            |             | 4        |         | 0.00907                                 | 0.18730 | -0.32 | -0.07                 | -0.20 | -0.31 | -0.07 | -0.38                 | 0.27103 | 0.78253 | 0.44                  | 0.24  | 0.47  | 0.39  | 0.51                       | 0.34  | 0.23  |                       |   |   |   |                       |   |   |                       |   |   |   |
| RPpos_600.4194_10.73   | RP   | pos        | 10.73           | 600.4194   |            |             | 4        |         | 0.85139                                 | 0.94811 | 0.04  | 0.23                  | 0.43  | 0.38  | 0.00  | -0.44                 | 0.62561 | 0.93416 | -0.28                 | -0.44 | -0.05 | -0.43 | -0.31                      | -0.28 | 1.77  |                       |   |   |   |                       |   |   |                       |   |   |   |
| RPpos_600.4683_10.47   | RP   | pos        | 10.47           | 600.4683   |            |             | 4        |         | 0.41292                                 | 0.71783 | -0.26 | -0.15                 | -0.18 | 0.10  | 0.12  | 0.43                  | 0.85258 | 0.97781 | -0.07                 | -0.42 | -0.37 | 0.31  | 0.20                       | -0.24 | 0.05  |                       |   |   |   |                       |   |   |                       |   |   |   |
| HLICpos_600.8442_0.55  | HLIC | pos        | 0.55            | 600.8442   |            |             | 4        |         | 0.44226                                 | 0.73848 | 0.23  | -0.23                 | 0.81  | 0.38  | 0.15  | 0.06                  | 0.77806 | 0.96555 | -0.05                 | 0.09  | 0.10  | -0.18 | 0.07                       | -0.27 | -0.14 |                       |   |   |   |                       |   |   |                       |   |   |   |
| RPpos_601.0208_10.48   | RP   | pos        | 10.48           | 601.0208   |            |             | 4        |         | 0.80127                                 | 0.92334 | 0.03  | -0.03                 | 0.71  | 0.23  | -0.12 | 0.61                  | 0.34927 | 0.83048 | -0.15                 | -0.18 | -0.02 | -0.11 | 0.13                       | -0.36 | -0.40 |                       |   |   |   |                       |   |   |                       |   |   |   |
| RPpos_601.0901_10.73   | RP   | pos        | 10.73           | 601.0901   |            |             | 4        |         | 0.83167                                 | 0.93648 | 0.16  | 0.38                  | 0.43  | 0.49  | -0.18 | -0.01                 | 0.97096 | 0.99673 | -0.09                 | -0.18 | -0.16 | -0.30 | 0.00                       | -0.31 | 2.45  |                       |   |   |   |                       |   |   |                       |   |   |   |
| RPneg_601.16101_9.644  | RP   | neg        | 9.644           | 601.1610   |            |             | 4        |         | 0.12883                                 | 0.46512 | -0.47 | 0.15                  | 0.03  | -0.50 | 0.28  | 0.73                  | 0.16919 | 0.68137 | 0.17                  | 0.90  | -0.09 | 0.39  | 0.52                       | -0.39 | -1.32 |                       |   |   |   |                       |   |   |                       |   |   |   |
| RPneg_601.16187_9.421  | RP   | neg        | 9.421           | 601.1619   |            |             | 4        |         | 0.17529                                 | 0.52072 | -0.44 | 0.04                  | 0.21  | -0.39 | 0.81  | -0.35                 | 0.89718 | 0.98504 | -0.02                 | 0.49  | 0.22  | -0.03 | 0.12                       | -0.15 | -0.66 |                       |   |   |   |                       |   |   |                       |   |   |   |
| RPneg_601.16205_9.306  | RP   | neg        | 9.306           | 601.1621   |            |             | 4        |         | 0.44142                                 | 0.73829 | -0.27 | 0.16                  | 0.35  | 0.24  | 0.66  | 0.09                  | 0.71260 | 0.95351 | 0.06                  | 0.29  | -0.02 | 0.65  | 0.40                       | -0.03 | -0.41 |                       |   |   |   |                       |   |   |                       |   |   |   |
| HLICpos_601.2639_1.8   | HLIC | pos        | 1.8             | 601.2639   |            |             | 4        |         | 0.18663                                 | 0.53338 | 0.60  | 0.55                  | 0.98  | 0.61  | 0.89  | -0.50                 | 0.31838 | 0.81449 | 0.44                  | 0.71  | 0.72  | 0.42  | 0.50                       | 0.14  | 0.08  |                       |   |   |   |                       |   |   |                       |   |   |   |
| RPpos_601.2661_5.42    | RP   | pos        | 5.42            | 601.2661   |            |             | 4        |         | 0.85199                                 | 0.94441 | 0.12  | 0.10                  | 0.18  | 0.11  | 0.28  | 0.40                  | 0.41506 | 0.86524 | 0.08                  | 0.45  | 0.12  | 0.05  | -0.09                      | 0.13  | 0.25  |                       |   |   |   |                       |   |   |                       |   |   |   |
| RPpos_601.2662_8.38    | RP   | pos        | 8.38            | 601.2662   |            |             | 4        |         | 0.09887                                 | 0.42954 | 0.55  | 1.03                  | 0.79  | 0.36  | 0.46  | 0.16                  | 0.17156 | 0.68443 | 0.59                  | 1.21  | 0.87  | 0.36  | 0.44                       | 0.42  | -0.07 |                       |   |   |   |                       |   |   |                       |   |   |   |
| RPpos_601.2662_5.49    | RP   | pos        | 5.49            | 601.2662   |            |             | 4        |         | 0.96227                                 | 0.98640 | 0.11  | 0.08                  | 0.25  | 0.08  | 0.37  | 0.21                  | 0.66054 | 0.94254 | 0.10                  | 0.16  | 0.17  | 0.30  | -0.01                      | 0.17  | 0.18  |                       |   |   |   |                       |   |   |                       |   |   |   |
| RPpos_601.2665_7.77    | RP   | pos        | 7.77            | 601.2665   |            |             | 4        |         | 0.35983                                 | 0.67835 | 0.27  | 0.57                  | 0.31  | 0.07  | 0.48  | 0.55                  | 0.20399 | 0.71960 | 0.22                  | 0.36  | 0.44  | 0.36  | 0.16                       | 0.09  | -0.26 |                       |   |   |   |                       |   |   |                       |   |   |   |
| RPpos_601.2668_7.65    | RP   | pos        | 7.65            | 601.2668   |            |             | 4        |         | 0.26945                                 | 0.65644 | 0.40  | 0.82                  | 0.31  | 0.37  | 0.41  | 0.71                  | 0.50669 | 0.90372 | 0.06                  | 0.34  | 0.03  | 0.31  | -0.20                      | 0.02  | 0.20  |                       |   |   |   |                       |   |   |                       |   |   |   |
| RPpos_601.2844_10.81   | RP   | pos        | 10.81           | 601.2844   |            |             | 4        |         | 0.19397                                 | 0.53950 | -0.41 | 0.05                  | -0.35 | -0.08 | -0.28 | -0.79                 | 0.00831 | 0.19492 | -0.43                 | -0.27 | -0.03 | 0.83  | -0.51                      | -0.60 | -0.28 |                       |   |   |   |                       |   |   |                       |   |   |   |
| RPpos_601.3566_10.48   | RP   | pos        | 10.48           | 601.3566   |            |             | 4        |         | 0.98642                                 | 0.99495 | -0.02 | -0.04                 | 0.76  | -0.10 | 0.03  | 0.59                  | 0.38499 | 0.84935 | -0.18                 | -0.21 | -0.12 | 0.03  | 0.10                       | -0.44 | -0.44 |                       |   |   |   |                       |   |   |                       |   |   |   |
| RPpos_601.3598_7.2     | RP   | pos        | 7.2             | 601.3598   |            |             | 4        |         | 0.44533                                 | 0.74083 | -0.24 | -0.09                 | 0.92  | -0.24 | -0.28 | 0.37                  | 0.24266 | 0.75888 | -0.38                 | -0.28 | -0.05 | -0.32 | -0.13                      | -0.41 | -0.50 |                       |   |   |   |                       |   |   |                       |   |   |   |
| RPpos_601.3708_11.47   | RP   | pos        | 11.47           | 601.3708   |            |             | 4        |         | 0.45879                                 | 0.75027 | 0.06  | 0.21                  | 0.31  | 0.05  | 0.17  | -0.19                 | 0.00500 | 0.14866 | 0.76                  | 0.65  | 0.70  | 0.64  | 0.93                       | 0.74  | 0.62  |                       |   |   |   |                       |   |   |                       |   |   |   |
| RPneg_601.41003_11.346 | RP   | neg        | 11.346          | 601.4100   |            |             | 4        |         | 0.42974                                 | 0.73024 | -0.27 | 0.66                  | 0.57  | 0.46  | -0.42 | 0.33                  | 0.47826 | 0.89386 | -0.19                 | 0.33  | 0.04  | -0.30 | 0.07                       | -0.34 | -0.78 |                       |   |   |   |                       |   |   |                       |   |   |   |
| RPneg_601.41229_11.489 | RP   | neg        | 11.489          | 601.4123   |            |             | 4        |         | 0.42390                                 | 0.72574 | -0.20 | 0.37                  | 0.54  | 0.04  | 0.21  | -0.22                 | 0.32234 | 0.81576 | 0.13                  | 0.12  | 0.18  | 0.43  | 0.74                       | -0.14 | -0.29 |                       |   |   |   |                       |   |   |                       |   |   |   |
| HLICpos_601.4189_0.4   | HLIC | pos        | 0.4             | 601.4189   |            |             | 4        |         | 0.03946                                 | 0.31957 | -0.51 | 0.01                  | -0.06 | -0.26 | -0.28 | -0.54                 | 0.57255 | 0.92224 | 0.24                  | 0.15  | 0.56  | 0.33  | 0.31                       | -0.60 | 0.61  |                       |   |   |   |                       |   |   |                       |   |   |   |
| RPpos_601.4598_12.2    | RP   | pos        | 12.2            | 601.4598   |            | no autoMSMS | 4        |         | 0.60237                                 | 0.83022 | -0.10 | 0.14                  | 0.09  | -0.04 | 0.09  | -0.43                 | 0.00000 | 0.00045 | 0.34                  | 0.35  | 0.58  | 0.34  | 0.40                       | 0.02  | 0.01  |                       |   |   |   |                       |   |   |                       |   |   |   |
| RPpos_601.5173_14.76   | RP   | pos        | 14.76           | 601.5173   |            |             | 4        |         | 0.55505                                 | 0.80675 | 0.15  | 0.57                  | 0.27  | -0.06 | 0.48  | -0.12                 | 0.35503 | 0.83325 | -0.24                 | -0.26 | -0.17 | -0.27 | -0.17                      | -0.18 | -0.43 |                       |   |   |   |                       |   |   |                       |   |   |   |
| RPpos_601.6641_11.18   | RP   | pos        | 11.18           | 601.6641   |            |             | 4        |         | 0.23092                                 | 0.57237 | -0.37 | -0.22                 | 0.75  | -0.27 | -0.94 | 0.35                  | 0.81485 | 0.97171 | -0.10                 | -0.14 | 0.01  | 0.02  | -0.01                      | -0.41 | -0.12 |                       |   |   |   |                       |   |   |                       |   |   |   |
| RPpos_601.6868_10.48   | RP   | pos        | 10.48           | 601.6868   |            |             | 4        |         | 0.79684                                 | 0.92147 | 0.04  | -0.14                 | 0.92  | -0.10 | 0.18  | 0.59                  | 0.44354 | 0.87968 | -0.13                 | -0.26 | -0.06 | -0.04 | 0.09                       | -0.33 | -0.23 |                       |   |   |   |                       |   |   |                       |   |   |   |
| RPneg_601.7768_4.329   | RP   | neg        | 4.329           | 601.7769   |            |             | 4        |         | 0.20411                                 | 0.5     |       |                       |       |       |       |                       |         |         |                       |       |       |       |                            |       |       |                       |   |   |   |                       |   |   |                       |   |   |   |

| Feature_ID              | Mode  | Ionization | Average Rt.min. | Average Mz | Metabolite | MSMS | ID_Level | HMDB_ID | IV-Alcohol self-administration (IV-ASA) |         |       |       |          |       |       |       |                       |         |         |       |       | IV-Alcohol clamp (IV-AC) |       |       |       |                            |   |   |   |          |   |         |   |                       |   |   |   |   |        |   |   |   |   |   |   |   |
|-------------------------|-------|------------|-----------------|------------|------------|------|----------|---------|-----------------------------------------|---------|-------|-------|----------|-------|-------|-------|-----------------------|---------|---------|-------|-------|--------------------------|-------|-------|-------|----------------------------|---|---|---|----------|---|---------|---|-----------------------|---|---|---|---|--------|---|---|---|---|---|---|---|
|                         |       |            |                 |            |            |      |          |         | Area Under the Curve (AUC)              |         |       |       | Baseline |       |       |       | IV-Ghrelin or Placebo |         |         |       |       | BrAC=0                   |       |       |       | Area Under the Curve (AUC) |   |   |   | Baseline |   | Post-LD |   | IV-Ghrelin or Placebo |   |   |   |   | BrAC=0 |   |   |   |   |   |   |   |
|                         |       |            |                 |            |            |      |          |         | p                                       | q       | r     | d     | d        | d     | d     | d     | d                     | d       | d       | d     | d     | d                        | d     | p     | q     | r                          | d | d | d | d        | d | d       | d | d                     | d | d | d | d | d      | d | d | d | d | d | d | d |
|                         |       |            |                 |            |            |      |          |         |                                         |         |       |       |          |       |       |       |                       |         |         |       |       |                          |       |       |       |                            |   |   |   |          |   |         |   |                       |   |   |   |   |        |   |   |   |   |   |   |   |
| RPneg_605_40619_11.799  | RP    | neg        | 11.799          |            | 605.40619  |      | 4        |         | 0.52657                                 | 0.79153 | 0.03  | 0.40  | 0.25     | 0.06  | 0.30  | -0.47 |                       | 0.25315 | 0.76898 | 0.42  | 0.34  | 0.51                     | 0.42  | 0.56  | 0.43  | 0.09                       |   |   |   |          |   |         |   |                       |   |   |   |   |        |   |   |   |   |   |   |   |
| HILICneg_605_40607_0.72 | HILIC | neg        | 0.72            |            | 605.40607  |      | 4        |         | 0.56746                                 | 0.81268 | 0.04  | 0.30  | 0.23     | 0.06  | 0.36  | -0.51 |                       | 0.31163 | 0.80947 | 0.40  | 0.31  | 0.41                     | 0.40  | 0.56  | 0.43  | 0.17                       |   |   |   |          |   |         |   |                       |   |   |   |   |        |   |   |   |   |   |   |   |
| HILICneg_605_40607_0.78 | HILIC | neg        | 0.78            |            | 605.40607  |      | 4        |         | 0.77613                                 | 0.91185 | 0.00  | 0.22  | 0.07     | 0.05  | 0.36  | -0.50 |                       | 0.19528 | 0.70973 | 0.52  | 0.32  | 0.62                     | 0.74  | 0.59  | 0.39  | 0.21                       |   |   |   |          |   |         |   |                       |   |   |   |   |        |   |   |   |   |   |   |   |
| HILICneg_605_4419_0.39  | HILIC | neg        | 0.39            |            | 605.4419   |      | 4        |         | 0.08675                                 | 0.41278 | 0.46  | 0.17  | 0.64     | 0.49  | 0.86  | -0.06 |                       | 0.92657 | 0.98928 | 0.06  | -0.42 | 0.00                     | 0.20  | 0.32  | 0.01  | -0.10                      |   |   |   |          |   |         |   |                       |   |   |   |   |        |   |   |   |   |   |   |   |
| RPneg_605_4739_11.182   | RP    | neg        | 11.182          |            | 605.4739   |      | 4        |         | 0.11519                                 | 0.64267 | 0.15  | 0.17  | 0.21     | 0.17  | 0.71  | 0.29  |                       | 0.34933 | 0.75556 | -0.32 | -0.14 | -0.08                    | 0.48  | -0.45 | -0.18 |                            |   |   |   |          |   |         |   |                       |   |   |   |   |        |   |   |   |   |   |   |   |
| HILICpos_605_3818_0.15  | HILIC | pos        | 0.15            |            | 605.3818   |      | 4        |         | 0.85882                                 | 0.94705 | -0.07 | -0.05 | -0.35    | 0.02  | -0.09 | -0.12 |                       | 0.21048 | 0.77392 | -0.10 | -0.22 | 0.09                     | -0.27 | -0.02 | -0.15 |                            |   |   |   |          |   |         |   |                       |   |   |   |   |        |   |   |   |   |   |   |   |
| RPneg_606_28668_12.651  | RP    | neg        | 12.651          |            | 606.28667  |      | 4        |         | 0.70163                                 | 0.87812 | -0.11 | 0.36  | 0.39     | -0.45 | 0.20  | 0.15  |                       | 0.90614 | 0.98670 | 0.00  | 0.05  | 0.15                     | -0.12 | 0.04  | 0.04  | -0.35                      |   |   |   |          |   |         |   |                       |   |   |   |   |        |   |   |   |   |   |   |   |
| RPneg_606_30066_9.911   | RP    | neg        | 9.911           |            | 606.30007  |      | 4        |         | 0.33705                                 | 0.66011 | -0.15 | 0.11  | 0.02     | 0.00  | 0.03  | -0.28 |                       | 0.38298 | 0.84854 | 0.30  | 0.34  | 0.27                     | 0.12  | 0.44  | 0.19  | 0.46                       |   |   |   |          |   |         |   |                       |   |   |   |   |        |   |   |   |   |   |   |   |
| RPneg_606_30078_10.059  | RP    | neg        | 10.059          |            | 606.30008  |      | 4        |         | 0.17039                                 | 0.51533 | -0.20 | 0.11  | -0.03    | -0.05 | -0.07 | -0.26 |                       | 0.70143 | 0.95170 | 0.15  | 0.21  | 0.20                     | 0.17  | 0.21  | 0.10  | 0.25                       |   |   |   |          |   |         |   |                       |   |   |   |   |        |   |   |   |   |   |   |   |
| HILICneg_606_301_1.38   | HILIC | neg        | 1.38            |            | 606.3010   |      | 4        |         | 0.21723                                 | 0.55899 | -0.16 | -0.07 | -0.07    | -0.08 | 0.09  | 0.04  |                       | 0.88587 | 0.98286 | 0.04  | 0.11  | 0.03                     | 0.13  | 0.03  | 0.01  | 0.24                       |   |   |   |          |   |         |   |                       |   |   |   |   |        |   |   |   |   |   |   |   |
| RPneg_606_32166_13.032  | RP    | neg        | 13.032          |            | 606.3217   |      | 4        |         | 0.17088                                 | 0.51600 | -0.42 | 0.09  | -0.35    | -0.26 | 0.07  | -0.28 |                       | 0.49491 | 0.89979 | 0.19  | 0.17  | 0.28                     | 0.08  | 0.14  | 0.16  | 0.41                       |   |   |   |          |   |         |   |                       |   |   |   |   |        |   |   |   |   |   |   |   |
| RPneg_606_32812_8.064   | RP    | neg        | 8.064           |            | 606.3281   |      | 4        |         | 0.30561                                 | 0.63448 | 0.10  | 0.17  | 0.19     | 0.06  | 0.18  | 0.09  |                       | 0.19277 | 0.70820 | -0.10 | -0.10 | -0.13                    | -0.03 | -0.06 | -0.11 | -0.18                      |   |   |   |          |   |         |   |                       |   |   |   |   |        |   |   |   |   |   |   |   |
| RPneg_606_33319_10.635  | RP    | neg        | 10.635          |            | 606.3332   |      | 4        |         | 0.00326                                 | 0.11826 | -0.21 | 0.03  | -0.30    | -0.03 | 0.14  | -0.39 |                       | 0.44471 | 0.88011 | 0.43  | 0.17  | 0.49                     | 0.44  | 0.80  | 0.26  | -0.15                      |   |   |   |          |   |         |   |                       |   |   |   |   |        |   |   |   |   |   |   |   |
| RPpos_606_3389_10.97    | RP    | pos        | 10.97           |            | 606.3389   |      | 4        |         | 0.87334                                 | 0.95270 | -0.06 | -0.49 | 0.93     | 0.00  | -0.09 | 0.45  |                       | 0.36225 | 0.83655 | -0.23 | -0.15 | -0.10                    | -0.16 | 0.01  | -0.62 | -0.26                      |   |   |   |          |   |         |   |                       |   |   |   |   |        |   |   |   |   |   |   |   |
| RPpos_606_3423_10.53    | RP    | pos        | 10.53           |            | 606.3423   |      | 4        |         | 0.50918                                 | 0.78201 | -0.19 | -0.36 | 0.83     | -0.11 | -0.20 | 0.44  |                       | 0.31198 | 0.80947 | -0.28 | -0.28 | -0.09                    | -0.13 | -0.02 | -0.62 | -0.44                      |   |   |   |          |   |         |   |                       |   |   |   |   |        |   |   |   |   |   |   |   |
| HILICpos_606_3425_0.43  | HILIC | pos        | 0.43            |            | 606.3425   |      | 4        |         | 0.42809                                 | 0.72888 | -0.26 | -0.32 | 1.02     | -0.19 | -0.48 | 0.62  |                       | 0.32011 | 0.81514 | -0.30 | -0.22 | -0.12                    | -0.25 | -0.05 | -0.56 | -0.41                      |   |   |   |          |   |         |   |                       |   |   |   |   |        |   |   |   |   |   |   |   |
| HILICpos_606_3488_0.83  | HILIC | pos        | 0.83            |            | 606.3488   |      | 4        |         | 0.48452                                 | 0.76726 | 0.18  | 0.02  | 0.79     | 0.08  | 0.56  | 0.27  |                       | 0.97255 | 0.99688 | -0.03 | -0.21 | 0.08                     | -0.09 | 0.22  | -0.35 | -0.09                      |   |   |   |          |   |         |   |                       |   |   |   |   |        |   |   |   |   |   |   |   |
| RPpos_606_3886_7.11     | RP    | pos        | 7.11            |            | 606.3886   |      | 4        |         | 0.28324                                 | 0.61745 | -0.33 | -0.25 | 0.88     | -0.33 | -0.37 | 0.30  |                       | 0.31403 | 0.81205 | -0.33 | -0.23 | -0.08                    | -0.26 | 0.02  | -0.51 | -0.46                      |   |   |   |          |   |         |   |                       |   |   |   |   |        |   |   |   |   |   |   |   |
| RPpos_606_4062_6.88     | RP    | pos        | 6.88            |            | 606.4062   |      | 4        |         | 0.17958                                 | 0.52425 | -0.38 | -0.25 | 0.64     | -0.38 | -0.37 | 0.29  |                       | 0.51933 | 0.90854 | -0.27 | -0.14 | -0.08                    | -0.16 | 0.00  | -0.58 | -0.27                      |   |   |   |          |   |         |   |                       |   |   |   |   |        |   |   |   |   |   |   |   |
| RPneg_606_41425_11.356  | RP    | neg        | 11.356          |            | 606.4143   |      | 4        |         | 0.12394                                 | 0.45916 | -0.31 | 0.16  | -0.23    | -0.35 | -0.15 | -0.22 |                       | 0.12187 | 0.60974 | 0.25  | -0.27 | -0.06                    | -0.35 | 0.22  | -0.17 |                            |   |   |   |          |   |         |   |                       |   |   |   |   |        |   |   |   |   |   |   |   |
| RPpos_606_4324_10.64    | RP    | pos        | 10.64           |            | 606.4324   |      | 4        |         | 0.57199                                 | 0.81512 | -0.03 | 0.30  | 0.31     | 0.25  | -0.02 | -0.19 |                       | 0.88092 | 0.98281 | -0.11 | 0.01  | 0.49                     | -0.65 | 0.29  | -0.57 | 0.54                       |   |   |   |          |   |         |   |                       |   |   |   |   |        |   |   |   |   |   |   |   |
| RPpos_606_4568_14.73    | RP    | pos        | 14.73           |            | 606.4568   |      | 4        |         | 0.12308                                 | 0.45875 | -0.18 | 0.01  | -0.19    | -0.13 | -0.17 | 0.00  |                       | 0.62999 | 0.93531 | -0.03 | -0.17 | 0.21                     | 0.19  | -0.09 | 0.17  | -0.28                      |   |   |   |          |   |         |   |                       |   |   |   |   |        |   |   |   |   |   |   |   |
| RPpos_606_507_13.4      | RP    | pos        | 13.4            |            | 606.5070   |      | 4        |         | 0.52285                                 | 0.78923 | 0.20  | 0.10  | 0.39     | 0.46  | 0.48  | -0.47 |                       | 0.11800 | 0.60341 | -0.19 | -0.32 | -0.38                    | -0.21 | -0.07 | 0.11  | -0.39                      |   |   |   |          |   |         |   |                       |   |   |   |   |        |   |   |   |   |   |   |   |
| RPpos_606_6754_10.97    | RP    | pos        | 10.97           |            | 606.6754   |      | 4        |         | 0.88709                                 | 0.95860 | -0.07 | -0.29 | 1.08     | -0.11 | -0.13 | 0.55  |                       | 0.61113 | 0.93043 | -0.16 | -0.18 | -0.05                    | -0.07 | 0.03  | -0.44 | -0.20                      |   |   |   |          |   |         |   |                       |   |   |   |   |        |   |   |   |   |   |   |   |
| HILICpos_606_8811_0.56  | HILIC | pos        | 0.56            |            | 606.8811   |      | 4        |         | 0.42659                                 | 0.72806 | 0.15  | 0.32  | 0.39     | 0.21  | 0.10  | 0.52  |                       | 0.67435 | 0.94679 | 0.06  | -0.19 | 0.02                     | 0.01  | 0.36  | 0.03  | 0.16                       |   |   |   |          |   |         |   |                       |   |   |   |   |        |   |   |   |   |   |   |   |
| RPpos_606_9844_11.63    | RP    | pos        | 11.63           |            | 606.9844   |      | 4        |         | 0.20412                                 | 0.54850 | 0.31  | -0.30 | 0.84     | 0.57  | 0.22  | 0.59  |                       | 0.33832 | 0.82464 | -0.32 | -0.27 | -0.24                    | -0.01 | -0.12 | -0.73 | -0.17                      |   |   |   |          |   |         |   |                       |   |   |   |   |        |   |   |   |   |   |   |   |
| RPpos_607_0089_10.97    | RP    | pos        | 10.97           |            | 607.0089   |      | 4        |         | 0.72860                                 | 0.88958 | -0.12 | -0.26 | 1.00     | -0.07 | -0.20 | 0.61  |                       | 0.67526 | 0.94685 | -0.13 | -0.26 | 0.08                     | -0.19 | 0.11  | -0.39 | -0.10                      |   |   |   |          |   |         |   |                       |   |   |   |   |        |   |   |   |   |   |   |   |
| HILICpos_607_2338_0.43  | HILIC | pos        | 0.43            |            | 607.2338   |      | 4        |         | 0.83191                                 | 0.93652 | 0.09  | 0.25  | 0.69     | 0.17  | 0.26  | -0.16 |                       | 0.66655 | 0.94404 | 0.02  | 0.50  | 0.40                     | 0.04  | -0.26 | -0.13 | -0.42                      |   |   |   |          |   |         |   |                       |   |   |   |   |        |   |   |   |   |   |   |   |
| RPneg_607_23779_7.002   | RP    | neg        | 7.002           |            | 607.2378   |      | 4        |         | 0.10453                                 | 0.43740 | 0.54  | -0.12 | 0.48     | 0.69  | 1.27  | 0.35  |                       | 0.47277 | 0.89173 | 0.21  | -0.30 | -0.26                    | 0.15  | 0.46  | 0.56  | 0.15                       |   |   |   |          |   |         |   |                       |   |   |   |   |        |   |   |   |   |   |   |   |
| RPpos_607_2521_11.73    | RP    | pos        | 11.73           |            | 607.2521   |      | 4        |         | 0.68876                                 | 0.87170 | 0.30  | 0.56  | 0.24     | 0.30  | 0.49  | -0.28 |                       | 0.44789 | 0.88099 | 0.55  | 1.06  | 0.56                     | 0.49  | 0.61  | 0.41  | 0.07                       |   |   |   |          |   |         |   |                       |   |   |   |   |        |   |   |   |   |   |   |   |
| RPpos_607_3048_11.29    | RP    | pos        | 11.29           |            | 607.3048   |      | 4        |         | 0.85637                                 | 0.94625 | -0.03 | -0.13 | 0.88     | 0.05  | -0.13 | 0.59  |                       | 0.49317 | 0.89856 | -0.25 | -0.07 | -0.17                    | -0.23 | 0.05  | -0.60 | -0.32                      |   |   |   |          |   |         |   |                       |   |   |   |   |        |   |   |   |   |   |   |   |
| RPpos_607_3143_11.63    | RP    | pos        | 11.63           |            | 607.3143   |      | 4        |         | 0.42968                                 | 0.73022 | 0.14  | -0.25 | 0.52     | 0.20  | 0.19  | 0.50  |                       | 0.47077 | 0.89700 | -0.26 | -0.18 | -0.13                    | -0.21 | 0.14  | -0.76 | -0.08                      |   |   |   |          |   |         |   |                       |   |   |   |   |        |   |   |   |   |   |   |   |
| RPneg_607_3498_9.782    | RP    | neg        | 9.782           |            | 607.3470   |      | 4        |         | 0.01911                                 | 0.87048 | -0.05 | 0.18  | -0.15    | -0.05 | -0.13 | 0.78  |                       | 0.02644 | 0.34302 | -0.64 | -0.23 | -0.59                    | -0.63 | -0.64 | -0.75 |                            |   |   |   |          |   |         |   |                       |   |   |   |   |        |   |   |   |   |   |   |   |
| RPneg_607_38501_10.831  | RP    | neg        | 10.831          |            | 607.3850   |      | 4        |         | 0.38730                                 | 0.69968 | 0.04  | 0.19  | 0.32     | 0.06  | 0.10  | -0.19 |                       | 0.27284 | 0.74490 | 0.24  | 0.24  | 0.24                     | 0.27  | 0.28  | 0.28  | 0.01                       |   |   |   |          |   |         |   |                       |   |   |   |   |        |   |   |   |   |   |   |   |
| RPneg_607_38531_11.753  | RP    | neg        | 11.753          |            | 607.3853   |      | 4        |         | 0.52378                                 | 0.78963 | -0.22 | 0.48  | -0.40    | -0.37 | 0.47  | 0.04  |                       | 0.57463 | 0.92285 | 0.22  | 0.65  | 0.67                     | -0.09 | 0.44  | 0.19  | -0.13                      |   |   |   |          |   |         |   |                       |   |   |   |   |        |   |   |   |   |   |   |   |
| RPneg_607_38544_10.505  | RP    | neg        | 10.505          |            | 607.3854   |      | 4        |         | 0.47155                                 | 0.75854 | 0.06  | 0.00  | 0.20     | 0.18  | 0.20  | -0.07 |                       | 0.09255 | 0.55918 | 0.32  | 0.30  | 0.18                     | 0.35  | 0.29  | 0.39  | 0.24                       |   |   |   |          |   |         |   |                       |   |   |   |   |        |   |   |   |   |   |   |   |
| RPneg_607_42139_12.256  | RP    | neg        | 12.256          |            | 607.4214   |      | 4        |         | 0.44108                                 | 0.73811 | -0.10 | 0.26  | 0.02     | -0.17 | 0.10  | -0.43 |                       | 0.11088 | 0.59240 | 0.11  | 0.09  | 0.25                     | 0.13  | 0.14  | 0.06  | -0.13                      |   |   |   |          |   |         |   |                       |   |   |   |   |        |   |   |   |   |   |   |   |
| HILICneg_607_4572_0.39  | HILIC | neg        | 0.39            |            | 607.4572   |      | 4        |         | 0.03591                                 | 0.31053 | 0.61  | 0.18  | 0.54     | 0.72  | 1.29  | -0.07 |                       | 0.67457 | 0.94679 | -0.07 | -0.29 | 0.00                     | 0.07  | 0.01  | -0.10 | -0.10                      |   |   |   |          |   |         |   |                       |   |   |   |   |        |   |   |   |   |   |   |   |
| RPneg_607_47363_10.878  | RP    | neg        | 10.878          |            | 607.4736   |      | 4        |         | 0.01474                                 | 0.22828 | 0.84  | 0.11  | 0.02     | -0.01 | 2.77  | 0.11  |                       | 0.79134 | 0.96739 | -0.14 | -0.28 | 0.21                     | -0.34 | -0.47 | 0.07  | 0.14                       |   |   |   |          |   |         |   |                       |   |   |   |   |        |   |   |   |   |   |   |   |
| RPpos_607_4963_11.52    | RP    | pos        | 11.52           |            | 607.4963   |      | 4        |         | 0.20963                                 | 0.55258 | -0.25 | -0.10 | -0.03    | 0.15  | 0.08  | 0.03  |                       | 0.83163 | 0.97501 | 0.07  | -0.16 | -0.27                    | -0.35 | 0.29  | 0.35  | 0.78                       |   |   |   |          |   |         |   |                       |   |   |   |   |        |   |   |   |   |   |   |   |
| RPpos_607_8589_9.24     | RP    | pos        | 9.24            |            | 607.8589   |      | 4        |         | 0.58839                                 | 0.82310 | 0.05  | -0.14 | 0.35     | 0.22  | -0.03 | -0.22 |                       | 0.98225 | 0.99752 | 0.03  | -0.15 | 0.01                     | 0.24  | 0.02  | -0.04 | -0.20                      |   |   |   |          |   |         |   |                       |   |   |   |   |        |   |   |   |   |   |   |   |
| RPpos_607_9883_10.97    | RP    | pos        | 10.97           |            | 607.9883   |      | 4        |         | 0.71267                                 | 0.88289 | -0.14 | -0.23 | 0.55     | -0.17 | -0.15 | 0.78  |                       | 0.96230 | 0.99573 | 0.00  | -0.15 | -0.17                    |       |       |       |                            |   |   |   |          |   |         |   |                       |   |   |   |   |        |   |   |   |   |   |   |   |





|                         |       |            |                 |            |            |      | IV-Alcohol self-administration (IV-ASA) |         |                            |         |         |       |       |                       |       |       | IV-Alcohol clamp (IV-AC) |         |                            |       |       |       |       |         |       |       |   |   |
|-------------------------|-------|------------|-----------------|------------|------------|------|-----------------------------------------|---------|----------------------------|---------|---------|-------|-------|-----------------------|-------|-------|--------------------------|---------|----------------------------|-------|-------|-------|-------|---------|-------|-------|---|---|
| Feature_ID              | Mode  | Ionization | Average_Rt.min. | Average_Mz | Metabolite | MSMS | ID_Level                                | HMDB_ID | Area Under the Curve (AUC) |         |         |       |       |                       |       |       |                          |         | Area Under the Curve (AUC) |       |       |       |       |         |       |       |   |   |
|                         |       |            |                 |            |            |      |                                         |         | Baseline                   |         |         |       |       | IV-Ghrelin or Placebo |       |       |                          |         | Baseline                   |       |       |       |       | Post-LD |       |       |   |   |
|                         |       |            |                 |            |            |      |                                         |         | p                          | q       | d       | d     | d     | d                     | d     | d     | d                        | d       | p                          | q     | d     | d     | d     | d       | d     | d     | d | d |
| RPpos_615.6948_10.47    | RP    | pos        | 10.47           | 615.6948   | 0.06       |      | 4                                       |         | 0.61190                    | 0.83407 | 0.08    | -0.06 | 0.91  | 0.18                  | 0.01  | 0.76  | 0.46038                  | 0.88511 | -0.16                      | -0.06 | -0.16 | -0.24 | 0.32  | -0.37   | -0.34 |       |   |   |
| RPpos_615.8361_10.18    | RP    | pos        | 10.18           | 615.8361   | 0.13       |      | 4                                       |         | 0.52750                    | 0.79190 | 0.13    | 0.20  | 0.66  | 0.21                  | 0.08  | 0.54  | 0.28678                  | 0.79355 | -0.14                      | -0.25 | -0.02 | -0.07 | -0.07 | -0.22   | -0.32 |       |   |   |
| RPpos_616.0283_10.47    | RP    | pos        | 10.47           | 616.0283   | 0.07       |      | 4                                       |         | 0.64739                    | 0.85103 | 0.07    | 0.26  | 0.70  | 0.09                  | 0.00  | 0.61  | 0.42913                  | 0.87325 | -0.13                      | -0.13 | -0.08 | -0.16 | 0.05  | -0.25   | -0.19 |       |   |   |
| RPpos_616.232_10.04     | RP    | pos        | 10.04           | 616.2320   | -0.14      |      | 4                                       |         | 0.31751                    | 0.64463 | -0.14   | 0.00  | 0.10  | -0.04                 | -0.06 | -0.08 | 0.61141                  | 0.93043 | 0.20                       | 0.14  | 0.22  | 0.40  | 0.15  | 0.01    | 0.09  |       |   |   |
| RPpos_616.2536_7.14     | RP    | pos        | 7.14            | 616.2536   | 0.52       |      | 4                                       |         | 0.66008                    | 0.79837 | 0.52    | 0.61  | 0.98  | 0.48                  | 0.66  | 0.03  | 0.48995                  | 0.89836 | 0.17                       | 0.64  | 0.32  | -0.18 | 0.34  | 0.17    | -0.07 |       |   |   |
| RPpos_616.3167_6.16     | HILIC | pos        | 6.16            | 616.3167   | 0.13       |      | 4                                       |         | 0.11381                    | 0.49349 | 0.13    | 0.11  | 0.93  | 0.16                  | -0.42 | -0.38 | 0.02138                  | 0.47775 | 0.77                       | 0.26  | 0.67  | 1.13  | 1.27  | 0.26    | -0.26 |       |   |   |
| RPpos_616.336_11.17     | RP    | pos        | 11.17           | 616.3360   | -0.42      |      | 4                                       |         | 0.18488                    | 0.53127 | -0.42   | -0.29 | 0.64  | -0.34                 | -0.35 | 0.51  | 0.75478                  | 0.96233 | -0.12                      | -0.05 | 0.01  | -0.02 | -0.01 | -0.58   | -0.14 |       |   |   |
| RPneg_616.36194_10.634  | RP    | neg        | 10.634          | 616.3619   | -0.04      |      | 4                                       |         | 0.00121                    | 0.06996 | -0.04   | -0.07 | -0.11 | -0.11                 | -0.14 | -0.35 | 0.64944                  | 0.93921 | 0.25                       | 0.35  | 0.25  | 0.20  | 0.30  | 0.31    | -0.01 |       |   |   |
| RPpos_616.362_10.47     | RP    | pos        | 10.47           | 616.3620   | 0.11       |      | 4                                       |         | 0.54112                    | 0.79850 | 0.11    | -0.01 | 0.68  | 0.05                  | 0.28  | 0.40  | 0.08011                  | 0.53023 | -0.29                      | -0.18 | -0.11 | -0.33 | -0.16 | -0.49   | -0.43 |       |   |   |
| RPneg_616.36224_10.527  | RP    | neg        | 10.527          | 616.3622   | -0.28      |      | 4                                       |         | 0.00049                    | 0.04160 | -0.28   | -0.01 | -0.11 | -0.19                 | 0.07  | -0.43 | 0.76038                  | 0.96251 | 0.19                       | 0.18  | 0.27  | 0.09  | 0.26  | 0.21    | 0.01  |       |   |   |
| HILICpos_616.3677_4.91  | HILIC | pos        | 4.91            | 616.3677   | 0.06       |      | 4                                       |         | 0.83560                    | 0.93838 | 0.06    | 0.04  | 0.17  | -0.06                 | 0.38  | 0.32  | 0.47279                  | 0.89173 | -0.23                      | -0.26 | -0.23 | -0.28 | -0.17 | -0.23   | -0.12 |       |   |   |
| HILICpos_616.4258_0.4   | HILIC | pos        | 0.4             | 616.4258   | -0.07      |      | 4                                       |         | 0.58597                    | 0.82164 | -0.07   | 0.14  | 0.36  | 0.08                  | 0.03  | 0.11  | 0.18918                  | 0.70460 | -0.51                      | -0.04 | -0.25 | -0.47 | -0.35 | -0.59   | 0.23  |       |   |   |
| RPpos_616.67_11.17      | RP    | pos        | 11.17           | 616.6700   | -0.40      |      | 4                                       |         | 0.17891                    | 0.52425 | -0.40   | -0.31 | 0.78  | -0.35                 | -0.94 | 0.42  | 0.54407                  | 0.91525 | -0.20                      | -0.21 | -0.13 | -0.15 | 0.00  | -0.50   | -0.11 |       |   |   |
| RPpos_616.8008_11.05    | RP    | pos        | 11.05           | 616.8008   | -0.17      |      | 4                                       |         | 0.54312                    | 0.79971 | -0.17   | -0.22 | 0.22  | -0.05                 | 0.13  | -0.12 | 0.69789                  | 0.95116 | -0.15                      | 0.14  | 0.17  | -0.59 | -0.40 | -0.06   | -0.01 |       |   |   |
| RPpos_617.0043_11.17    | RP    | pos        | 11.17           | 617.0043   | -0.38      |      | 4                                       |         | 0.19443                    | 0.53962 | -0.38   | -0.29 | 0.74  | -0.31                 | -0.92 | 0.58  | 0.62706                  | 0.93462 | -0.17                      | -0.18 | -0.11 | -0.16 | 0.12  | -0.46   | -0.18 |       |   |   |
| RPpos_617.3382_14.09    | RP    | pos        | 14.09           | 617.3382   | -0.23      |      | 4                                       |         | 0.30682                    | 0.63538 | -0.23   | 0.35  | -0.24 | 0.01                  | 0.05  | -0.08 | 0.66653                  | 0.94404 | -0.06                      | 0.03  | -0.44 | 0.42  | -0.48 | 0.26    | -0.27 |       |   |   |
| RPpos_617.4747_11.52    | RP    | pos        | 11.52           | 617.4747   | 0.22       |      | 4                                       |         | 0.09262                    | 0.30192 | 0.22    | 0.05  | 0.23  | 0.22                  | 0.56  | 0.35  | 0.73410                  | 0.95858 | -0.12                      | -0.13 | -0.13 | -0.09 | 0.00  | -0.16   | -0.02 |       |   |   |
| HILICpos_617.4749_0.39  | HILIC | pos        | 0.39            | 617.4749   | 0.21       |      | 4                                       |         | 0.09624                    | 0.31107 | 0.21    | -0.03 | 0.14  | 0.06                  | 0.75  | 0.49  | 0.41668                  | 0.86598 | -0.26                      | -0.32 | -0.20 | -0.29 | -0.20 | -0.21   | -0.30 |       |   |   |
| RPpos_617.5137_13.98    | RP    | pos        | 13.98           | 617.5137   | 0.07       |      | 4                                       |         | 0.86404                    | 0.94954 | 0.07    | 0.16  | 0.21  | 0.00                  | 0.32  | 0.07  | 0.66149                  | 0.94270 | -0.22                      | 0.33  | 0.09  | 0.00  | 0.12  | -0.12   | -0.14 |       |   |   |
| RPneg_617.7360_6.046    | RP    | neg        | 6.046           | 617.7360   | -0.34      |      | 4                                       |         | 0.04551                    | 0.33646 | -0.34   | -0.14 | -0.22 | -0.57                 | -0.24 | 0.18  | 0.23832                  | 0.74521 | 0.30                       | 0.39  | -0.09 | 0.33  | 0.20  | 0.25    | 0.68  |       |   |   |
| HILICneg_617.7368_6.15  | HILIC | neg        | 6.15            | 617.7368   | -0.37      |      | 4                                       |         | 0.03672                    | 0.31218 | -0.37   | -0.15 | -0.25 | -0.52                 | -0.26 | 0.17  | 0.16454                  | 0.67460 | 0.32                       | 0.30  | -0.04 | 0.37  | 0.17  | 0.30    | 0.70  |       |   |   |
| RPpos_618.0134_10.47    | RP    | pos        | 10.47           | 618.0134   | 0.09       |      | 4                                       |         | 0.53702                    | 0.79711 | 0.09    | -0.29 | 0.85  | 0.04                  | 0.02  | 0.37  | 0.10592                  | 0.58363 | -0.26                      | -0.67 | -0.29 | -0.05 | -0.19 | -0.32   | 0.13  |       |   |   |
| HILICneg_618.1984_2.05  | HILIC | neg        | 2.05            | 618.1984   | -0.13      |      | 4                                       |         | 0.67214                    | 0.86354 | -0.13   | -0.28 | 0.31  | 0.48                  | -0.02 | -0.34 | 0.99318                  | 0.99904 | -0.02                      | -0.19 | -0.01 | -0.38 | 0.52  | 0.15    | -0.40 |       |   |   |
| RPpos_618.3214_11.17    | RP    | pos        | 11.17           | 618.3214   | -0.43      |      | 4                                       |         | 0.17756                    | 0.52334 | -0.43   | -0.23 | 0.85  | -0.31                 | -0.93 | 0.27  | 0.69552                  | 0.95059 | -0.13                      | -0.36 | 0.13  | 0.02  | -0.11 | -0.35   | -0.11 |       |   |   |
| RPpos_618.3475_10.18    | RP    | pos        | 10.18           | 618.3475   | 0.02       |      | 4                                       |         | 0.95900                    | 0.98548 | 0.02    | 0.25  | 0.61  | -0.08                 | -0.08 | 0.81  | 0.67231                  | 0.94608 | -0.01                      | -0.18 | 0.21  | 0.08  | -0.06 | -0.14   | 0.01  |       |   |   |
| HILICpos_618.3834_4.87  | HILIC | pos        | 4.87            | 618.3834   | 0.02       |      | 4                                       |         | 0.85798                    | 0.94665 | 0.02    | 0.12  | -0.04 | 0.01                  | 0.44  | 0.35  | 0.41667                  | 0.86598 | 0.02                       | 0.07  | 0.14  | -0.11 | 0.00  | 0.01    | 0.04  |       |   |   |
| HILICpos_618.4043_0.43  | HILIC | pos        | 0.43            | 618.4043   | 0.06       |      | 4                                       |         | 0.93654                    | 0.97709 | 0.06    | 0.39  | 0.42  | -0.03                 | 0.13  | 0.31  | 0.41260                  | 0.86451 | -0.52                      | 0.00  | -0.17 | -0.59 | -0.29 | -0.51   | 0.71  |       |   |   |
| RPneg_619.11493_8.316   | RP    | neg        | 8.316           | 619.1149   | -0.41      |      | 4                                       |         | 0.23518                    | 0.57691 | -0.41   | 0.34  | 0.17  | -0.11                 | 0.49  | 0.42  | 0.56117                  | 0.91988 | -0.16                      | 0.53  | -0.08 | 0.02  | -0.04 | -0.52   | -0.76 |       |   |   |
| HILICpos_619.122_5.1    | HILIC | pos        | 5.1             | 619.1220   | 0.51       |      | 4                                       |         | 0.08022                    | 0.40460 | 0.51    | 0.29  | 1.30  | 0.63                  | 0.33  | -0.46 | 0.03682                  | 0.39172 | 0.84                       | 0.19  | 1.08  | 1.73  | 0.74  | 0.52    | -0.23 |       |   |   |
| RPpos_619.257_10.12     | RP    | pos        | 10.12           | 619.2570   | -0.57      |      | 4                                       |         | 0.00409                    | 0.13075 | -0.57   | -0.11 | -0.30 | -0.31                 | -0.45 | -0.64 | 0.81708                  | 0.97227 | 0.04                       | 0.17  | 0.13  | -0.34 | 0.20  | 0.31    | -0.28 |       |   |   |
| HILICpos_619.2856_4.7   | HILIC | pos        | 4.7             | 619.2856   | 0.8734     |      | 4                                       |         | 0.68734                    | 0.87110 | 0.8734  | 0.01  | 0.11  | 0.11                  | -0.05 | 0.14  | 0.18                     | 0.15959 | 0.66876                    | 0.42  | 0.26  | 0.57  | 0.42  | 0.42    | 0.53  | 0.13  |   |   |
| HILICneg_619.2873_4.62  | HILIC | neg        | 4.62            | 619.2873   | 0.53783    |      | 4                                       |         | 0.53783                    | 0.79761 | 0.53783 | 0.19  | 0.29  | 0.48                  | 0.33  | 0.46  | 0.06                     | 0.92604 | 0.99908                    | -0.04 | 0.00  | 0.20  | 0.01  | -0.01   | 0.01  | -0.56 |   |   |
| HILICneg_619.2876_4.71  | HILIC | neg        | 4.71            | 619.2876   | 0.44517    |      | 4                                       |         | 0.44517                    | 0.74083 | 0.44517 | 0.15  | 0.45  | 0.26                  | 0.68  | 0.29  | 0.61633                  | 0.93438 | 0.05                       | 0.11  | 0.15  | 0.07  | 0.22  | 0.01    | -0.34 |       |   |   |
| RPneg_619.28821_15.477  | RP    | neg        | 15.477          | 619.2882   | 0.42       |      | 4                                       |         | 0.41205                    | 0.71695 | 0.42    | 0.46  | 0.45  | 0.15                  | 0.74  | 0.30  | 0.78192                  | 0.96597 | 0.01                       | -0.21 | 0.16  | 0.08  | 0.14  | 0.07    | -0.31 |       |   |   |
| HILICneg_619.3061_6.98  | HILIC | neg        | 6.98            | 619.3061   | 0.04       |      | 4                                       |         | 0.75607                    | 0.90339 | 0.04    | 0.06  | 0.37  | 0.17                  | 0.05  | -0.49 | 0.11815                  | 0.60379 | 0.18                       | 0.28  | 0.31  | 0.50  | 0.00  | -0.12   | -0.28 |       |   |   |
| RPneg_619.33704_7.112   | RP    | neg        | 7.112           | 619.3370   | -0.29      |      | 4                                       |         | 0.34107                    | 0.66329 | -0.29   | -0.15 | 1.09  | -0.19                 | -0.40 | 0.22  | 0.25276                  | 0.76890 | -0.41                      | -0.24 | -0.08 | -0.37 | -0.05 | -0.54   | -0.51 |       |   |   |
| RPpos_619.3547_5.74     | RP    | pos        | 5.74            | 619.3547   | -0.22      |      | 4                                       |         | 0.38972                    | 0.70129 | -0.22   | 0.49  | -0.17 | 0.08                  | -0.10 | -0.17 | 0.10367                  | 0.57907 | -0.34                      | -0.29 | -0.30 | -0.64 | -0.45 | 0.27    | -0.20 |       |   |   |
| HILICpos_619.4806_0.98  | HILIC | pos        | 0.98            | 619.4806   | -0.02      |      | 4                                       |         | 0.76048                    | 0.95000 | -0.02   | -0.11 | 0.31  | -0.10                 | 0.37  | -0.49 | 0.15211                  | 0.65780 | -0.37                      | -0.59 | -0.55 | 0.12  | -0.39 | -0.24   | -0.54 |       |   |   |
| RPpos_619.4918_11.52    | RP    | pos        | 11.52           | 619.4918   | 0.20       |      | 4                                       |         | 0.11494                    | 0.45035 | 0.20    | 0.04  | 0.19  | 0.17                  | 0.57  | -0.12 | 0.63875                  | 0.93638 | 0.11                       | 0.16  | 0.24  | 0.06  | 0.22  | -0.03   | 0.26  |       |   |   |
| RPpos_619.5273_14.75    | RP    | pos        | 14.75           | 619.5273   | 0.15       |      | 4                                       |         | 0.66499                    | 0.85973 | 0.15    | 0.33  | 0.29  | 0.07                  | 0.49  | -0.40 | 0.24099                  | 0.75800 | -0.23                      | -0.21 | -0.26 | -0.21 | -0.09 | -0.09   | -0.63 |       |   |   |
| RPpos_619.6124_11.17    | RP    | pos        | 11.17           | 619.6124   | 0.27       |      | 4                                       |         | 0.51046                    | 0.78266 | 0.27    | 0.31  | -0.07 | 0.14                  | 1.39  | -0.59 | 0.19329                  | 0.70820 | 0.09                       | 10.67 | 1.00  | 0.42  | -0.06 | 1.00    | 0.11  |       |   |   |
| RPpos_619.7502_6.05     | RP    | pos        | 6.05            | 619.7502   | -0.38      |      | 4                                       |         | 0.02811                    | 0.28685 | -0.38   | -0.11 | -0.27 | -0.55                 | -0.32 | 0.50  | 0.22960                  | 0.74656 | 0.42                       | 0.63  | 0.08  | 0.24  | 0.07  | 0.53    | 0.89  |       |   |   |
| HILICpos_619.8411_10.53 | HILIC | pos        | 10.53           | 619.8411   | -0.18      |      | 4                                       |         | 0.48018                    | 0.76412 | -0.18   | -0.55 | 0.78  | -0.22                 | -0.18 | 0.70  | 0.58644                  | 0.92534 | -0.14                      | -0.20 | -0.07 | 0.06  | 0.06  | -0.52   | -0.28 |       |   |   |
| HILICneg_620.14_0.57    | HILIC | neg        | 0.57            | 620.1400   | -0.09      |      | 4                                       |         | 0.27341                    | 0.60924 | -0.09   | -0.22 | -0.04 | -0.07                 | -0.04 | 0.38  | 0.50619                  | 0.90363 | -0.19                      | -0.19 | -0.53 | -0.16 | -0.14 | -0.26   | 0.88  |       |   |   |
| RPneg_620.31848_10.335  | RP    | neg        | 10.335          | 620.3185   | -0.10      |      | 4                                       |         | 0.62782                    | 0.84252 | -0.10   | -0.08 | 0.25  | 0.05                  | -0.03 | 0.07  | 0.83786                  | 0.97588 | 0.36                       | 0.51  | 0.15  | -0.49 | -0.02 | 0.64    | 0.56  |       |   |   |
| RPneg_620.3430_9.188    | RP    | neg        | 9.188           | 620.3430   | 0.06       |      | 4                                       |         | 0.22864                    | 0.57037 | 0.06    | 0.10  | -0.06 | 0.04                  | 0.13  | 0.18  | 0.32948                  | 0.73711 | -0.10                      | 0.03  | 0.06  | 0.12  | 0.11  | -0.16   | -0.05 |       |   |   |
| RPneg_620.35474_10.831  | RP    | neg        | 10.831          | 620.3547   | -0.09      |      | 4                                       |         | 0.03139                    | 0.25799 | -0.09   | -0.09 | -0.16 | -0.28                 | -0.42 | 0.42  | 0.93550                  | 0.90900 | 0.11                       | 0.22  | 0.21  | 0.10  | 0.08  | 0.11    | -0.17 |       |   |   |
| RPneg_620.35541_11.066  | RP    | neg        | 11.066          | 620.3554   | -0.41      |      | 4                                       |         | 0.01921                    | 0.25232 | -0.41   | 0.01  | -0.03 | -0.33                 | -0.32 | -0.52 | 0.37807                  | 0.84565 | -0.0                       |       |       |       |       |         |       |       |   |   |

| Feature_ID             | Mode  | Ionization | Average_Rt.min. | Average_Mz | Metabolite | MSMS | ID_Level | HMDB_ID | IV-Alcohol self-administration (IV-ASA) |         |       |       |       |       |                       |        |         |         |       |       | IV-Alcohol clamp (IV-AC)   |         |       |       |       |       |                       |         |   |  |   |  |
|------------------------|-------|------------|-----------------|------------|------------|------|----------|---------|-----------------------------------------|---------|-------|-------|-------|-------|-----------------------|--------|---------|---------|-------|-------|----------------------------|---------|-------|-------|-------|-------|-----------------------|---------|---|--|---|--|
|                        |       |            |                 |            |            |      |          |         | Area Under the Curve (AUC)              |         |       |       |       |       | IV-Ghrelin or Placebo |        |         |         |       |       | Area Under the Curve (AUC) |         |       |       |       |       | IV-Ghrelin or Placebo |         |   |  |   |  |
|                        |       |            |                 |            |            |      |          |         | Baseline                                | IV-ASA  | d     |       | d     |       | Baseline              | IV-ASA | d       |         | d     |       | Baseline                   | Post-LD | d     |       | d     |       | Baseline              | Post-LD | d |  | d |  |
| RPneg_622.37164_11.166 | RP    | neg        | 11.166          | 622.3716   |            |      | 4        |         | 0.00291                                 | 0.11119 | -0.59 | 0.21  | -0.38 | -0.68 | -0.57                 | -0.65  | 0.86843 | 0.98025 | 0.20  | 0.03  | 0.33                       | 0.22    | 0.38  | 0.38  | -0.07 | 0.00  |                       |         |   |  |   |  |
| RPneg_622.40826_11.365 | RP    | neg        | 11.365          | 622.4083   |            |      | 4        |         | 0.01422                                 | 0.22596 | -0.41 | -0.06 | -0.18 | -0.58 | -0.25                 | -0.38  | 0.94415 | 0.99197 | 0.06  | 0.04  | 0.13                       | 0.02    | 0.10  | 0.10  | 0.15  | -0.12 |                       |         |   |  |   |  |
| RPpos_622.6658_10.96   | RP    | pos        | 10.96           | 622.6658   |            |      | 4        |         | 0.64726                                 | 0.85096 | 0.10  | 0.02  | 0.62  | 0.06  | 0.24                  | 0.05   | 0.78443 | 0.96659 | -0.11 | -0.22 | 0.08                       | 0.36    | -0.22 | -0.20 | -0.41 |       |                       |         |   |  |   |  |
| HILICpos_622.8564_0.55 | HILIC | pos        | 0.55            | 622.8564   |            |      | 4        |         | 0.26549                                 | 0.60202 | 0.37  | -0.17 | 0.98  | 0.46  | 0.35                  | 0.03   | 0.98840 | 0.99810 | 0.00  | 0.00  | 0.16                       | -0.09   | 0.20  | -0.41 | 0.13  |       |                       |         |   |  |   |  |
| HILICneg_622.9714_0.48 | HILIC | neg        | 0.48            | 622.9714   |            |      | 4        |         | 0.71057                                 | 0.88195 | 0.13  | 0.50  | 0.32  | 0.17  | 0.22                  | 0.12   | 0.80923 | 0.20460 | -0.68 | -0.38 | -0.45                      | -0.84   | -0.45 | -0.71 | -0.39 |       |                       |         |   |  |   |  |
| RPpos_623.0018_10.46   | RP    | pos        | 10.46           | 623.0018   |            |      | 4        |         | 0.72677                                 | 0.88866 | 0.07  | -0.18 | 0.75  | 0.07  | 0.02                  | 0.58   | 0.48519 | 0.87551 | -0.34 | -0.41 | 0.16                       | -0.23   | 0.34  | -0.45 | -0.39 |       |                       |         |   |  |   |  |
| HILICneg_623.0724_5.85 | HILIC | neg        | 5.85            | 623.0724   |            |      | 4        |         | 0.65131                                 | 0.85293 | 0.01  | 0.23  | 0.29  | 0.45  | -0.02                 | -0.74  | 0.07547 | 0.52053 | 0.91  | 1.04  | 0.41                       | 0.73    | 1.22  | 1.53  | -0.53 |       |                       |         |   |  |   |  |
| RPneg_623.2858_10.76   | RP    | pos        | 10.76           | 623.2858   |            |      | 4        |         | 0.01149                                 | 0.20692 | -0.50 | -0.15 | -0.08 | -0.34 | -0.79                 | -0.35  | 0.78296 | 0.96604 | 0.09  | 0.15  | -0.02                      | 0.04    | 0.26  | 0.10  | 0.02  |       |                       |         |   |  |   |  |
| RPpos_623.2862_10.87   | RP    | pos        | 10.87           | 623.2862   |            |      | 4        |         | 0.00290                                 | 0.11098 | -0.81 | 0.11  | -0.40 | -0.44 | -1.09                 | 0.10   | 0.45719 | 0.88441 | 0.46  | 0.55  | 0.22                       | 0.75    | 0.30  | 0.28  | -0.33 |       |                       |         |   |  |   |  |
| RPpos_623.2903_7.15    | RP    | pos        | 7.15            | 623.2903   |            |      | 4        |         | 0.62652                                 | 0.84170 | -0.19 | 0.48  | 0.63  | 0.01  | 0.63                  | 0.14   | 0.75915 | 0.96233 | -0.12 | 0.97  | 0.15                       | -0.66   | 0.15  | -0.37 | -0.63 |       |                       |         |   |  |   |  |
| RPpos_623.3333_10.96   | RP    | pos        | 10.96           | 623.3333   |            |      | 4        |         | 0.78299                                 | 0.91498 | 0.02  | -0.40 | 1.21  | -0.12 | 0.05                  | 0.49   | 0.63953 | 0.93638 | -0.15 | -0.26 | -0.06                      | -0.17   | 0.16  | -0.60 | 0.02  |       |                       |         |   |  |   |  |
| HILICpos_623.4129_1.22 | HILIC | pos        | 1.22            | 623.4129   |            |      | 4        |         | 0.01560                                 | 0.23292 | -0.54 | -0.16 | -0.29 | -0.33 | -0.51                 | -0.10  | 0.85365 | 0.97808 | 0.11  | -0.09 | 0.30                       | 0.00    | 0.48  | 0.14  | -0.27 |       |                       |         |   |  |   |  |
| RPneg_623.4198_11.649  | RP    | neg        | 11.649          | 623.4150   |            |      | 4        |         | 0.94755                                 | 0.98069 | -0.14 | 0.15  | -0.04 | -0.13 | 0.10                  | -0.19  | 0.24928 | 0.76555 | 0.23  | 0.22  | 0.39                       | 0.09    | 0.22  | 0.30  | 0.06  |       |                       |         |   |  |   |  |
| RPpos_623.8168_10.81   | RP    | pos        | 10.81           | 623.8168   |            |      | 4        |         | 0.68716                                 | 0.87110 | -0.12 | 0.13  | 1.05  | -0.16 | -0.28                 | 0.34   | 0.56304 | 0.92016 | -0.20 | -0.23 | -0.09                      | 0.05    | 0.12  | -0.54 | -0.29 |       |                       |         |   |  |   |  |
| RPneg_624.20197_10.234 | RP    | neg        | 10.234          | 624.2020   |            |      | 4        |         | 0.99625                                 | 0.99865 | -0.06 | -0.08 | 0.08  | 0.00  | 0.26                  | 0.95   | 0.88846 | 0.98372 | 0.03  | -0.14 | -0.12                      | 0.15    | 0.10  | 0.24  | 0.11  |       |                       |         |   |  |   |  |
| RPneg_624.26086_9.91   | RP    | neg        | 9.91            | 624.2609   |            |      | 4        |         | 0.38970                                 | 0.70129 | -0.13 | 0.24  | 0.06  | 0.02  | -0.07                 | -0.26  | 0.52294 | 0.90914 | 0.22  | 0.38  | 0.39                       | -0.18   | 0.44  | 0.05  | 0.27  |       |                       |         |   |  |   |  |
| RPneg_624.26123_10.059 | RP    | neg        | 10.059          | 624.2612   |            |      | 4        |         | 0.21161                                 | 0.55439 | -0.19 | 0.11  | -0.05 | -0.13 | 0.04                  | -0.24  | 0.60115 | 0.92810 | 0.18  | 0.13  | 0.25                       | 0.12    | 0.20  | 0.17  | 0.27  |       |                       |         |   |  |   |  |
| RPneg_624.2869_5.453   | RP    | neg        | 5.453           | 624.2869   |            |      | 4        |         | 0.52938                                 | 0.79306 | -0.12 | 0.05  | 0.46  | -0.12 | 0.03                  | 0.05   | 0.46460 | 0.89761 | 0.11  | 0.13  | 0.27                       | 0.18    | 0.42  | -0.01 | -0.67 |       |                       |         |   |  |   |  |
| RPneg_624.2899_4.85    | RP    | neg        | 4.85            | 624.2870   |            |      | 4        |         | 0.65573                                 | 0.85565 | -0.03 | -0.15 | 0.19  | -0.03 | 0.12                  | 0.16   | 0.74142 | 0.95996 | -0.01 | 0.11  | 0.12                       | -0.16   | 0.31  | -0.12 | -0.68 |       |                       |         |   |  |   |  |
| HILICneg_624.2913_1.19 | HILIC | neg        | 1.19            | 624.2913   |            |      | 4        |         | 0.00889                                 | 0.18546 | -0.41 | -0.11 | -0.07 | -0.08 | -0.28                 | -0.24  | 0.88090 | 0.99752 | -0.01 | 0.12  | 0.25                       | 0.11    | 0.08  | 0.18  | 0.14  |       |                       |         |   |  |   |  |
| HILICneg_624.2913_1.35 | HILIC | neg        | 1.35            | 624.2913   |            |      | 4        |         | 0.18819                                 | 0.53406 | -0.40 | 0.72  | -0.14 | -0.03 | -0.02                 | 0.46   | 0.10180 | 0.57479 | -0.24 | -0.40 | -0.41                      | -0.54   | -0.19 | -0.55 | -0.01 |       |                       |         |   |  |   |  |
| RPneg_624.2981_10.832  | RP    | neg        | 10.832          | 624.2981   |            |      | 4        |         | 0.07019                                 | 0.38479 | -0.43 | -0.18 | -0.05 | -0.34 | -0.16                 | -0.40  | 0.78857 | 0.96713 | 0.21  | 0.18  | 0.34                       | 0.24    | 0.22  | 0.01  | -0.05 |       |                       |         |   |  |   |  |
| RPneg_624.31281_10.02  | RP    | neg        | 10.02           | 624.3128   |            |      | 4        |         | 0.03174                                 | 0.29834 | -0.46 | 0.01  | -0.05 | -0.29 | -0.41                 | -0.95  | 0.98339 | 0.99758 | 0.02  | -0.06 | 0.07                       | 0.03    | 0.14  | 0.11  | -0.26 |       |                       |         |   |  |   |  |
| RPneg_624.31299_8.825  | RP    | neg        | 8.825           | 624.3130   |            |      | 4        |         | 0.15671                                 | 0.43965 | -0.29 | -0.07 | -0.10 | -0.25 | -0.23                 | -0.38  | 0.04868 | 0.44078 | -0.11 | -0.16 | -0.13                      | -0.44   | -0.12 | -0.09 | 0.06  |       |                       |         |   |  |   |  |
| RPneg_624.33759_7.785  | RP    | neg        | 7.785           | 624.3376   |            |      | 4        |         | 0.00460                                 | 0.13645 | 0.78  | 0.94  | 0.95  | 0.76  | 1.33                  | 0.14   | 0.33849 | 0.82468 | 0.51  | 0.05  | 0.34                       | 0.65    | 0.69  | 0.76  | 0.06  |       |                       |         |   |  |   |  |
| RPneg_624.33777_8.956  | RP    | neg        | 8.956           | 624.3378   |            |      | 4        |         | 0.01848                                 | 0.24801 | 0.71  | 0.41  | 1.03  | 0.89  | 0.79                  | 0.14   | 0.01177 | 0.23129 | 0.35  | 0.06  | 0.28                       | 0.50    | 0.39  | 0.37  | 0.15  |       |                       |         |   |  |   |  |
| RPneg_624.3378_7.93    | RP    | pos        | 7.93            | 624.3378   |            |      | 4        |         | 0.04954                                 | 0.34580 | 0.35  | 0.35  | 0.73  | 0.32  | 0.23                  | 0.44   | 0.23970 | 0.75656 | 0.16  | 0.05  | 0.11                       | 0.19    | 0.32  | 0.20  | 0.09  |       |                       |         |   |  |   |  |
| RPneg_624.33795_8.585  | RP    | neg        | 8.585           | 624.3380   |            |      | 4        |         | 0.38610                                 | 0.69865 | -0.18 | -0.24 | 0.08  | 0.23  | -0.06                 | -0.10  | 0.90471 | 0.98615 | -0.05 | 0.06  | 0.48                       | 0.09    | 0.15  | -0.43 | -0.11 |       |                       |         |   |  |   |  |
| RPneg_624.33838_8.752  | RP    | neg        | 8.752           | 624.3384   |            |      | 4        |         | 0.00303                                 | 0.11339 | 0.15  | 0.14  | 0.33  | 0.11  | 0.18                  | 0.16   | 0.60060 | 0.92810 | -0.07 | -0.15 | -0.11                      | -0.04   | -0.04 | -0.03 | -0.08 |       |                       |         |   |  |   |  |
| RPneg_624.33844_8.641  | RP    | neg        | 8.641           | 624.3384   |            |      | 4        |         | 0.81990                                 | 0.93151 | 0.10  | 0.03  | 0.40  | 0.08  | 0.17                  | -0.05  | 0.28671 | 0.79355 | 0.03  | -0.11 | -0.01                      | 0.14    | -0.03 | 0.08  | -0.02 |       |                       |         |   |  |   |  |
| RPneg_624.33856_7.616  | RP    | neg        | 7.616           | 624.3386   |            |      | 4        |         | 0.56406                                 | 0.81116 | 0.35  | 0.49  | 0.51  | 0.36  | 0.72                  | -0.14  | 0.96476 | 0.99622 | -0.04 | -0.14 | -0.10                      | 0.05    | -0.01 | -0.02 | 0.07  |       |                       |         |   |  |   |  |
| HILICneg_624.3397_5.61 | HILIC | neg        | 5.61            | 624.3397   |            |      | 4        |         | 0.059470                                | 0.30583 | 0.16  | 0.10  | 0.33  | 0.14  | 0.20                  | 0.10   | 0.98572 | 0.99792 | -0.03 | -0.11 | -0.07                      | 0.00    | 0.01  | -0.01 | -0.07 |       |                       |         |   |  |   |  |
| RPpos_624.4402_10.93   | RP    | pos        | 10.93           | 624.4402   |            |      | 4        |         | 0.74453                                 | 0.89850 | -0.04 | 0.31  | 0.13  | 0.15  | 0.02                  | -0.39  | 0.53550 | 0.83343 | -0.25 | -0.11 | 0.12                       | -0.16   | 0.10  | -0.72 | 0.13  |       |                       |         |   |  |   |  |
| RPpos_624.4464_11.77   | RP    | pos        | 11.77           | 624.4464   |            |      | 4        |         | 0.47071                                 | 0.75778 | 0.05  | 0.35  | 0.29  | 0.09  | 0.30                  | -0.47  | 0.30782 | 0.80726 | 0.39  | 0.33  | 0.49                       | 0.44    | 0.50  | 0.38  | 0.03  |       |                       |         |   |  |   |  |
| RPpos_624.7734_10.93   | RP    | pos        | 10.93           | 624.7734   |            |      | 4        |         | 0.94696                                 | 0.98048 | 0.00  | 0.00  | 0.41  | 0.20  | -0.12                 | 0.16   | 0.53312 | 0.91295 | -0.27 | 0.11  | -0.33                      | -0.23   | -0.03 | -0.48 | 1.23  |       |                       |         |   |  |   |  |
| HILICpos_625.3201_0.46 | HILIC | pos        | 0.46            | 625.3201   |            |      | 4        |         | 0.38437                                 | 0.69734 | -0.26 | -0.34 | 0.48  | 0.04  | -0.33                 | -0.16  | 0.16716 | 0.67851 | 0.36  | 0.16  | 0.88                       | 0.39    | 0.17  | -0.24 | 0.20  |       |                       |         |   |  |   |  |
| RPneg_625.35803_9.154  | RP    | neg        | 9.154           | 625.3580   |            |      | 4        |         | 0.34634                                 | 0.66735 | 0.36  | 0.90  | 0.31  | 0.23  | 0.62                  | 0.23   | 0.01956 | 0.29534 | -0.20 | -0.12 | -0.17                      | -0.16   | -0.29 | -0.22 | -0.09 |       |                       |         |   |  |   |  |
| RPneg_625.36078_8.526  | RP    | neg        | 8.526           | 625.3608   |            |      | 4        |         | 0.00160                                 | 0.08130 | 0.80  | 0.12  | 0.86  | 1.07  | 1.34                  | -0.08  | 0.00005 | 0.00773 | 0.47  | -0.07 | 0.24                       | 0.25    | 0.99  | 1.03  | -0.14 |       |                       |         |   |  |   |  |
| RPpos_625.3904_13.36   | RP    | pos        | 13.36           | 625.3904   |            |      | 4        |         | 0.77587                                 | 0.91172 | 0.05  | 0.66  | -0.37 | 1.30  | -0.40                 | 0.02   | 0.19052 | 0.70588 | -0.38 | -0.28 | -0.20                      | 0.16    | -0.40 | -0.21 | -0.28 |       |                       |         |   |  |   |  |
| RPpos_625.4323_10.58   | RP    | pos        | 10.58           | 625.4323   |            |      | 4        |         | 0.42468                                 | 0.72620 | 0.27  | 0.27  | 0.15  | 0.52  | 0.29                  | -0.05  | 0.21401 | 0.73062 | -0.55 | -0.34 | -0.49                      | -0.40   | 0.04  | -0.52 | 1.12  |       |                       |         |   |  |   |  |
| RPpos_625.4548_10.55   | RP    | pos        | 10.55           | 625.4548   |            |      | 4        |         | 0.02377                                 | 0.27180 | -0.26 | 0.06  | 0.06  | -0.24 | -0.18                 | -0.31  | 0.12008 | 0.60697 | 0.36  | 0.46  | 0.45                       | 0.57    | 0.14  | 0.24  | 0.29  |       |                       |         |   |  |   |  |
| RPpos_625.692_10.73    | RP    | pos        | 10.73           | 625.6920   |            |      | 4        |         | 0.86831                                 | 0.95065 | -0.07 | -0.25 | 0.99  | -0.12 | 0.13                  | 0.30   | 0.91887 | 0.98860 | -0.05 | -0.06 | -0.11                      | 0.01    | 0.16  | -0.35 | 0.01  |       |                       |         |   |  |   |  |
| HILICpos_625.7982_7.9  | HILIC | pos        | 7.9             | 625.7982   |            |      | 4        |         | 0.65972                                 | 0.85748 | -0.17 | -0.06 | -0.32 | 0.17  | 0.38                  | -0.20  | 0.73628 | 0.95863 | -0.16 | 0.01  | -0.15                      | -0.24   | -0.45 | 0.17  | 0.58  |       |                       |         |   |  |   |  |
| HILICpos_626.028_0.48  | HILIC | pos        | 0.48            | 626.0280   |            |      | 4        |         | 0.51018                                 | 0.78261 | -0.21 | -0.32 | 0.38  | -0.16 | -0.17                 | 0.13   | 0.58682 | 0.9253  |       |       |                            |         |       |       |       |       |                       |         |   |  |   |  |



| Feature_ID                | Mode  | Ionization | Average Rt.min. | Average Mz | Metabolite | MSMS | ID_Level | HMDB_ID | IV-Alcohol self-administration (IV-ASA) |         |       |         |       |                       |          |       |         |         | IV-Alcohol clamp (IV-AC)   |       |          |       |       |                       |       |       |          |   |   |         |   |   |
|---------------------------|-------|------------|-----------------|------------|------------|------|----------|---------|-----------------------------------------|---------|-------|---------|-------|-----------------------|----------|-------|---------|---------|----------------------------|-------|----------|-------|-------|-----------------------|-------|-------|----------|---|---|---------|---|---|
|                           |       |            |                 |            |            |      |          |         | Area Under the Curve (AUC)              |         |       |         |       | IV-Ghrelin or Placebo |          |       |         |         | Area Under the Curve (AUC) |       |          |       |       | IV-Ghrelin or Placebo |       |       |          |   |   |         |   |   |
|                           |       |            |                 |            |            |      |          |         | Baseline                                |         |       | Post-LD |       |                       | Baseline |       |         | Post-LD |                            |       | Baseline |       |       | Post-LD               |       |       | Baseline |   |   | Post-LD |   |   |
|                           |       |            |                 |            |            |      |          |         | p                                       | q       | d     | p       | q     | d                     | p        | q     | d       | p       | q                          | d     | p        | q     | d     | p                     | q     | d     | p        | q | d | p       | q | d |
| RPpos_636.0237_10.96      | RP    | pos        | 10.96           | 636.0237   |            |      | 4        |         | 0.89095                                 | 0.29613 | 0.01  | -0.39   | 1.05  | 0.07                  | 0.01     | 0.34  | 0.60392 | 0.92892 | -0.16                      | -0.28 | -0.04    | -0.21 | 0.10  | -0.32                 | -0.14 |       |          |   |   |         |   |   |
| RPneg_636.26025_10.133    | RP    | neg        | 10.133          | 636.2603   |            |      | 4        |         | 0.02142                                 | 0.26302 | -0.45 | -0.05   | -0.08 | -0.17                 | -0.25    | -0.69 | 0.56748 | 0.92089 | 0.10                       | 0.07  | 0.01     | 0.12  | 0.20  | 0.18                  | -0.13 |       |          |   |   |         |   |   |
| RPpos_636.3316_11.61      | RP    | pos        | 11.61           | 636.3316   |            |      | 4        |         | 0.82679                                 | 0.93452 | 0.03  | -0.23   | 0.69  | -0.12                 | 0.03     | 0.18  | 0.68195 | 0.94821 | -0.17                      | -0.19 | -0.16    | -0.17 | 0.20  | -0.40                 | -0.28 |       |          |   |   |         |   |   |
| HILICpos_636.3358_0.41    | HILIC | pos        | 0.41            | 636.3358   |            |      | 4        |         | 0.34028                                 | 0.66274 | -0.26 | -0.42   | 0.39  | -0.02                 | -0.36    | 0.19  | 0.35440 | 0.83234 | -0.38                      | -0.10 | -0.36    | -0.45 | 0.11  | -0.53                 | -0.36 |       |          |   |   |         |   |   |
| RPpos_636.3358_11.05      | RP    | pos        | 11.05           | 636.3358   |            |      | 4        |         | 0.47487                                 | 0.76084 | 0.91  | -0.19   | 0.34  | 0.91                  | -0.15    | -0.20 | 0.51    | 0.70968 | 0.95278                    | -0.15 | -0.12    | -0.06 | -0.07 | 0.06                  | -0.34 | -0.47 |          |   |   |         |   |   |
| RPneg_636.3476_10.897     | RP    | neg        | 10.897          | 636.3476   |            |      | 4        |         | 0.02419                                 | 0.27422 | -0.59 | 0.00    | -0.16 | -0.29                 | 0.06     | -0.27 | 0.71    | 0.40789 | 0.85150                    | -0.05 | 0.03     | 0.01  | 0.07  | 0.17                  | -0.20 | -0.34 |          |   |   |         |   |   |
| RPneg_636.34778_10.78     | RP    | neg        | 10.78           | 636.3478   |            |      | 4        |         | 0.01853                                 | 0.24801 | -0.44 | 0.02    | -0.17 | -0.33                 | -0.24    | -0.46 | 0.41906 | 0.86713 | 0.05                       | 0.08  | 0.02     | 0.08  | 0.17  | 0.04                  | -0.15 |       |          |   |   |         |   |   |
| HILICneg_636.3487_1.25    | HILIC | neg        | 1.25            | 636.3487   |            |      | 4        |         | 0.02094                                 | 0.26101 | -0.53 | -0.03   | 0.04  | -0.48                 | -0.50    | 0.30  | 0.82839 | 0.97425 | -0.06                      | -0.20 | -0.26    | 0.01  | 0.15  | -0.10                 | -0.05 |       |          |   |   |         |   |   |
| RPpos_636.3585_10.96      | RP    | pos        | 10.96           | 636.3585   |            |      | 4        |         | 0.89156                                 | 0.96051 | -0.06 | -0.21   | 0.88  | -0.08                 | -0.07    | 0.45  | 0.51955 | 0.90863 | -0.20                      | -0.30 | 0.05     | -0.25 | 0.04  | -0.48                 | -0.27 |       |          |   |   |         |   |   |
| RPpos_636.3807_5.74       | RP    | pos        | 5.74            | 636.3807   |            |      | 4        |         | 0.26559                                 | 0.60215 | -0.30 | 0.46    | -0.16 | -0.06                 | -0.10    | -0.19 | 0.11804 | 0.60352 | -0.31                      | -0.29 | -0.27    | -0.78 | -0.33 | 0.44                  | -0.27 |       |          |   |   |         |   |   |
| RPpos_636.3969_7.2        | RP    | pos        | 7.2             | 636.3969   |            |      | 4        |         | 0.42448                                 | 0.72609 | -0.25 | -0.13   | 0.88  | -0.17                 | -0.35    | 0.32  | 0.26505 | 0.77729 | -0.38                      | -0.28 | -0.04    | -0.24 | -0.15 | -0.48                 | -0.51 |       |          |   |   |         |   |   |
| HILICpos_636.3977_0.49    | HILIC | pos        | 0.49            | 636.3977   |            |      | 4        |         | 0.28364                                 | 0.61760 | -0.33 | -0.27   | 0.89  | -0.38                 | -0.37    | 0.11  | 0.40060 | 0.85821 | -0.29                      | -0.25 | 0.01     | -0.24 | 0.06  | -0.45                 | -0.43 |       |          |   |   |         |   |   |
| HILICpos_636.3981_0.69    | HILIC | pos        | 0.69            | 636.3981   |            |      | 4        |         | 0.49738                                 | 0.77461 | 0.09  | 0.40    | 0.25  | 0.04                  | 0.16     | 0.54  | 0.44206 | 0.87936 | 0.02                       | -0.10 | 0.17     | -0.19 | 0.03  | 0.17                  | -0.12 |       |          |   |   |         |   |   |
| RPpos_636.3981_6.85       | RP    | pos        | 6.85            | 636.3981   |            |      | 4        |         | 0.13936                                 | 0.47911 | 0.27  | 0.06    | 0.25  | 0.26                  | 0.54     | 0.78  | 0.18499 | 0.70062 | 0.15                       | -0.12 | 0.07     | -0.02 | 0.25  | 0.66                  | 0.03  |       |          |   |   |         |   |   |
| RPneg_636.4057_11.191     | RP    | neg        | 11.191          | 636.4057   |            |      | 4        |         | 0.01163                                 | 0.20749 | 1.02  | 0.03    | 0.54  | 1.18                  | 2.01     | -0.57 | 0.77503 | 0.96469 | -0.09                      | -0.27 | 0.19     | -0.13 | -0.05 | -0.05                 | -0.11 |       |          |   |   |         |   |   |
| HILICpos_636.8736_0.45    | HILIC | pos        | 0.45            | 636.8736   |            |      | 4        |         | 0.76097                                 | 0.90508 | 0.06  | 0.11    | 0.43  | 0.17                  | 0.09     | 0.72  | 0.02108 | 0.30692 | -0.24                      | -0.15 | -0.19    | -0.36 | -0.01 | -0.50                 | -0.10 |       |          |   |   |         |   |   |
| HILICpos_636.8981_0.76    | HILIC | pos        | 0.76            | 636.8981   |            |      | 4        |         | 0.80646                                 | 0.92567 | 0.04  | 0.21    | 0.19  | 0.05                  | 0.08     | 0.67  | 0.98897 | 0.99810 | 0.04                       | -0.34 | 0.04     | -0.06 | 0.01  | 0.60                  | -0.01 |       |          |   |   |         |   |   |
| RPpos_636.9988_11.61      | RP    | pos        | 11.61           | 636.9988   |            |      | 4        |         | 0.56503                                 | 0.81162 | 0.10  | -0.08   | 0.72  | 0.02                  | 0.20     | 0.30  | 0.85584 | 0.97668 | -0.11                      | -0.10 | -0.39    | -0.26 | 0.88  | -0.46                 | -0.06 |       |          |   |   |         |   |   |
| RPneg_637.14038_9.29      | RP    | neg        | 9.29            | 637.1404   |            |      | 4        |         | 0.21454                                 | 0.55959 | -0.42 | 0.15    | 0.30  | 0.05                  | 0.47     | -0.29 | 0.97707 | 0.99726 | -0.02                      | 0.35  | 0.06     | 0.51  | 0.34  | 0.47                  | -0.47 |       |          |   |   |         |   |   |
| RPneg_637.14117_9.415     | RP    | neg        | 9.415           | 637.1412   |            |      | 4        |         | 0.72657                                 | 0.88852 | -0.17 | 0.44    | 0.44  | 0.32                  | 0.86     | 0.71  | 0.30350 | 0.80433 | -0.18                      | -0.10 | 0.08     | 0.17  | 0.07  | -0.29                 | -0.44 |       |          |   |   |         |   |   |
| RPpos_637.3041_10.49      | RP    | pos        | 10.49           | 637.3041   |            |      | 4        |         | 0.82865                                 | 0.93506 | -0.08 | 0.05    | -0.55 | 0.54                  | 1.27     | 0.21  | 0.37695 | 0.84546 | -0.19                      | -0.07 | -0.56    | -0.25 | -0.08 | 0.27                  | -0.16 |       |          |   |   |         |   |   |
| RPpos_637.3549_8.75       | RP    | pos        | 8.75            | 637.3549   |            |      | 4        |         | 0.93027                                 | 0.97497 | 0.03  | 0.13    | -0.09 | 0.14                  | 0.25     | -0.34 | 0.47379 | 0.89235 | 0.05                       | 0.07  | -0.01    | -0.06 | 0.02  | 0.30                  | -0.01 |       |          |   |   |         |   |   |
| HILICpos_637.4285_1.2     | HILIC | pos        | 1.2             | 637.4285   |            |      | 4        |         | 0.00056                                 | 0.13604 | -0.44 | 0.03    | -0.09 | -0.36                 | -0.29    | -0.44 | 0.34751 | 0.83026 | 0.00                       | 0.08  | -0.01    | 0.04  | 0.24  | -0.02                 | -0.58 |       |          |   |   |         |   |   |
| RPneg_637.43024_11.86     | RP    | neg        | 11.86           | 637.4302   |            |      | 4        |         | 0.40527                                 | 0.71205 | -0.20 | 0.14    | -0.03 | -0.19                 | 0.10     | -0.48 | 0.21441 | 0.73101 | 0.07                       | 0.00  | 0.26     | 0.09  | 0.12  | 0.04                  | -0.17 |       |          |   |   |         |   |   |
| RPpos_637.4801_13.42      | RP    | pos        | 13.42           | 637.4801   |            |      | 4        |         | 0.58914                                 | 0.82348 | 0.12  | 0.42    | 0.12  | 0.04                  | 0.19     | 0.58  | 0.17433 | 0.68878 | 0.17                       | 0.03  | 0.48     | 0.18  | 0.10  | -0.02                 | 0.06  |       |          |   |   |         |   |   |
| RPpos_637.675_10.96       | RP    | pos        | 10.96           | 637.6750   |            |      | 4        |         | 0.98449                                 | 0.99408 | -0.02 | -0.14   | 0.29  | 0.14                  | -0.02    | 0.50  | 0.57541 | 0.92304 | -0.19                      | -0.49 | -0.02    | 0.05  | -0.14 | -0.33                 | -0.29 |       |          |   |   |         |   |   |
| RPpos_637.8499_10.18      | RP    | pos        | 10.18           | 637.8499   |            |      | 4        |         | 0.52328                                 | 0.78939 | 0.10  | 0.32    | 0.45  | 0.08                  | 0.17     | 0.87  | 0.20449 | 0.72067 | -0.17                      | -0.22 | -0.17    | -0.16 | 0.01  | -0.11                 | -0.49 |       |          |   |   |         |   |   |
| RPpos_638.009_10.96       | RP    | pos        | 10.96           | 638.0090   |            |      | 4        |         | 0.94970                                 | 0.98123 | -0.01 | -0.25   | 0.84  | 0.21                  | -0.19    | 0.63  | 0.60587 | 0.92920 | -0.19                      | -0.20 | -0.13    | 0.03  | 0.03  | -0.40                 | -0.33 |       |          |   |   |         |   |   |
| RPneg_638.23999_10.057    | RP    | neg        | 10.057          | 638.2400   |            |      | 4        |         | 0.25941                                 | 0.59755 | -0.19 | 0.15    | -0.10 | -0.05                 | -0.01    | -0.28 | 0.71060 | 0.95280 | 0.15                       | 0.62  | 0.13     | 0.16  | -0.04 | 0.11                  | 0.36  |       |          |   |   |         |   |   |
| RPneg_638.27423_10.569    | RP    | neg        | 10.569          | 638.2742   |            |      | 4        |         | 0.00571                                 | 0.14775 | -0.56 | -0.05   | -0.25 | -0.26                 | -0.33    | -0.42 | 0.80378 | 0.96983 | 0.14                       | 0.20  | 0.17     | 0.11  | 0.18  | 0.21                  | 0.01  |       |          |   |   |         |   |   |
| RPneg_638.30151_5.523     | RP    | neg        | 5.523           | 638.3015   |            |      | 4        |         | 0.87040                                 | 0.95134 | 0.03  | 0.05    | 0.68  | 0.18                  | 0.15     | 0.36  | 0.26701 | 0.77921 | 0.21                       | 0.23  | 0.20     | 0.24  | 0.83  | 0.03                  | -0.42 |       |          |   |   |         |   |   |
| RPpos_638.3251_9.67       | RP    | pos        | 9.67            | 638.3251   |            |      | 4        |         | 0.86481                                 | 0.94954 | 0.03  | -0.27   | 0.53  | 0.09                  | 0.32     | 0.56  | 0.67161 | 0.94591 | -0.18                      | -0.23 | 0.12     | -0.42 | -0.24 | -0.36                 | -0.22 |       |          |   |   |         |   |   |
| HILICpos_638.3298_4.66    | HILIC | pos        | 4.66            | 638.3298   |            |      | 4        |         | 0.56903                                 | 0.81349 | -0.42 | 0.25    | 0.43  | 0.05                  | 0.60     | 0.32  | 0.58748 | 0.92590 | 0.04                       | 0.08  | 0.12     | 0.09  | 0.17  | 0.13                  | -0.49 |       |          |   |   |         |   |   |
| RPneg_638.33179_10.163    | RP    | neg        | 10.163          | 638.3318   |            |      | 4        |         | 0.32028                                 | 0.64679 | 0.14  | -0.16   | 0.85  | 0.30                  | 0.15     | 0.32  | 0.46366 | 0.88698 | 0.02                       | -0.33 | -0.02    | 0.13  | 0.29  | -0.05                 | -0.13 |       |          |   |   |         |   |   |
| RPneg_638.33203_10.037    | RP    | neg        | 10.037          | 638.3320   |            |      | 4        |         | 0.20293                                 | 0.54747 | 0.25  | -0.16   | 1.18  | 0.29                  | 0.37     | 0.10  | 0.51457 | 0.90649 | 0.04                       | -0.27 | -0.11    | 0.23  | 0.30  | -0.13                 | -0.07 |       |          |   |   |         |   |   |
| HILICpos_638.3353_0.36    | HILIC | pos        | 0.36            | 638.3353   |            |      | 4        |         | 0.17294                                 | 0.51840 | 0.09  | 0.13    | 0.35  | 0.24                  | -0.26    | 0.71  | 0.39992 | 0.85821 | 0.04                       | 0.01  | 0.09     | 0.07  | 0.14  | 0.18                  | -0.35 |       |          |   |   |         |   |   |
| RPpos_638.3364_11.36      | RP    | pos        | 11.36           | 638.3364   |            |      | 4        |         | 0.28791                                 | 0.62150 | 0.10  | 0.10    | 0.37  | 0.50                  | -0.36    | 0.47  | 0.29539 | 0.79878 | 0.22                       | 0.27  | 0.29     | 0.49  | 0.06  | 0.38                  | -0.56 |       |          |   |   |         |   |   |
| HILICneg_638.44141_10.637 | HILIC | neg        | 10.637          | 638.4414   |            |      | 4        |         | 0.94266                                 | 0.97904 | -0.08 | 0.01    | -0.10 | 0.32                  | 0.59     | 0.58  | 0.15003 | 0.65470 | -0.09                      | -0.09 | -0.09    | 0.08  | -0.39 | -0.12                 | 0.53  |       |          |   |   |         |   |   |
| RPpos_638.7252_6.05       | RP    | pos        | 6.05            | 638.7252   |            |      | 4        |         | 0.02092                                 | 0.26101 | -0.39 | -0.04   | -0.32 | -0.53                 | -0.32    | 0.84  | 0.20627 | 0.72262 | 0.56                       | 0.73  | 0.39     | 0.19  | 0.15  | 0.46                  | 1.05  |       |          |   |   |         |   |   |
| RPpos_638.8136_11.05      | RP    | pos        | 11.05           | 638.8136   |            |      | 4        |         | 0.24120                                 | 0.58195 | -0.25 | -0.28   | 0.68  | -0.18                 | -0.34    | 0.51  | 0.43797 | 0.87688 | -0.26                      | 0.02  | -0.18    | -0.05 | -0.07 | -0.64                 | -0.28 |       |          |   |   |         |   |   |
| HILICneg_638.9487_0.48    | HILIC | neg        | 0.48            | 638.9487   |            |      | 4        |         | 0.11747                                 | 0.45310 | 0.41  | 0.61    | 0.40  | 0.65                  | 0.41     | 0.26  | 0.00088 | 0.05254 | -0.87                      | -0.32 | -0.85    | -0.71 | -0.73 | -0.89                 | -0.73 |       |          |   |   |         |   |   |
| RPpos_639.1145_10.91      | RP    | pos        | 10.91           | 639.1145   |            |      | 4        |         | 0.88730                                 | 0.95875 | -0.03 | 0.15    | 0.23  | 0.43                  | -0.47    | 0.01  | 0.89110 | 0.98433 | 0.01                       | 0.99  | -0.40    | 0.26  | -0.22 | -0.35                 | 1.26  |       |          |   |   |         |   |   |
| HILICneg_639.1365_0.48    | HILIC | neg        | 0.48            | 639.1365   |            |      | 4        |         | 0.18909                                 | 0.53570 | 0.22  | 0.19    | 0.23  | 0.19                  | 0.31     | 0.45  | 0.04397 | 0.42172 | -0.38                      | -0.41 | -0.40    | -0.37 | -0.40 | -0.38                 | -0.21 |       |          |   |   |         |   |   |
| RPpos_639.1757_11.73      | RP    | pos        | 11.73           | 639.1757   |            |      | 4        |         | 0.87567                                 | 0.95348 | 0.23  | 0.44    | -0.11 | 0.42                  | 0.56     | -0.50 | 0.09222 | 0.55862 | 0.91                       | 1.94  | 0.60     | 1.34  | 0.78  | 0.00                  | -0.08 |       |          |   |   |         |   |   |
| HILICpos_639.2989_2.08    | HILIC | pos        | 2.08            | 639.2989   |            |      | 4        |         | 0.40632                                 | 0.71277 | 0.24  | 0.20    | 0.75  | 0.00                  | 0.52     | 0.74  | 0.01272 | 0.24141 | 0.24                       | 0.18  | 0.28     | 0.20  | 0.44  | 0.33                  | -0.55 |       |          |   |   |         |   |   |
| RPneg_639.4158_9.492      | RP    | neg        | 9.492           | 639.4117   |            |      | 4        |         | 0.00030                                 | 0.02681 | 0.50  | 0.62    | 0.84  | 0.48                  | 0.87     | 0.11  | 0.15992 | 0.69093 | 0.41                       | 0.16  | 0.81     | 0.17  | 0.66  | 0.38                  | 0.18  |       |          |   |   |         |   |   |
| RPpos_639.4958_13.98      | RP    | pos        | 13.98           | 639.4958   |            |      | 4        |         | 0.97235                                 | 0.98979 | 0.04  | 0.11    | 0.19  | 0.02                  | 0.32     | 0.08  | 0.36392 | 0.83767 | -0.29                      | 0.36  | 0.28     | 0.36  | -0.26 | 0.31                  | -0.14 |       |          |   |   |         |   |   |
| RPpos_640.1081_10.57      | RP    | pos        | 10.57           | 640.1081   |            |      | 4        |         | 0.59135                                 | 0.82464 | -0.07 | -0.35   | 0.45  | 0.11                  | -0.06    | -0.02 | 0.42196 | 0.86958 | -0.51                      | 0.49  | -0.31    | -0.34 | -0.04 | -0.56                 | 1.15  |       |          |   |   |         |   |   |
| RPneg_640.29065_10.78     | RP    | neg        | 10.78           | 640.2907   |            |      | 4        |         |                                         |         |       |         |       |                       |          |       |         |         |                            |       |          |       |       |                       |       |       |          |   |   |         |   |   |



| Feature_ID             | Mode  | Ionization | Average_Rt.min. | Average_Mz | Metabolite | MSMS | ID_Level | HMDB_ID | IV-Alcohol self-administration (IV-ASA) |         |       |                       |       |       |       |        |                            |         | IV-Alcohol clamp (IV-AC) |                       |       |       |       |        |       |   |   |   |
|------------------------|-------|------------|-----------------|------------|------------|------|----------|---------|-----------------------------------------|---------|-------|-----------------------|-------|-------|-------|--------|----------------------------|---------|--------------------------|-----------------------|-------|-------|-------|--------|-------|---|---|---|
|                        |       |            |                 |            |            |      |          |         | Area Under the Curve (AUC)              |         |       | IV-Ghrelin or Placebo |       |       |       | BRAC=0 | Area Under the Curve (AUC) |         |                          | IV-Ghrelin or Placebo |       |       |       | BRAC=0 |       |   |   |   |
|                        |       |            |                 |            |            |      |          |         | p                                       | q       | d     | d                     | d     |       |       |        | d                          | d       | d                        | d                     | d     | d     | d     |        | d     | d |   |   |
|                        |       |            |                 |            |            |      |          |         |                                         |         |       |                       | d     | d     | d     |        |                            |         |                          |                       |       |       |       |        |       |   | d | d |
| RPneg_642.41748_11.1   | RP    | neg        | 11.1            | 642.4175   |            |      | 4        |         | 0.82408                                 | 0.93341 | -0.07 | 0.05                  | 0.15  | 0.44  | 1.45  | 0.11   | 0.56229                    | 0.92016 | -0.08                    | -0.36                 | -0.21 | -0.46 | 0.06  | 0.15   | 0.45  |   |   |   |
| RPpos_642.5162_11.13   | RP    | pos        | 11.13           | 642.5162   |            |      | 4        |         | 0.81876                                 | 0.93988 | -0.06 | -0.18                 | -0.23 | 0.68  | 0.16  | 1.72   | 0.81876                    | 0.97238 | -0.11                    | 0.40                  | -0.41 | 0.19  | -0.25 | -0.70  | 2.97  |   |   |   |
| RPpos_642.6859_10.73   | RP    | pos        | 10.73           | 642.6859   |            |      | 4        |         | 0.51785                                 | 0.78687 | 0.14  | 0.05                  | 1.29  | 0.06  | -0.03 | 0.67   | 0.96117                    | 0.99553 | -0.04                    | -0.26                 | 0.16  | 0.14  | 0.45  | -0.35  | -0.01 |   |   |   |
| RPpos_642.9948_11.37   | RP    | pos        | 11.37           | 642.9948   |            |      | 4        |         | 0.99860                                 | 0.99943 | -0.01 | -0.31                 | 0.63  | 0.07  | -0.04 | 0.63   | 0.96515                    | 0.99637 | -0.08                    | -0.16                 | -0.06 | 0.10  | 0.38  | -0.38  | -0.36 |   |   |   |
| RPneg_643.27747_11.755 | RP    | neg        | 11.755          | 643.2775   |            |      | 4        |         | 0.85178                                 | 0.94441 | 0.27  | 0.54                  | 0.02  | 0.31  | 0.64  | -0.08  | 0.15650                    | 0.66394 | 0.62                     | 0.78                  | 0.50  | 0.57  | 0.11  | 0.28   | 0.05  |   |   |   |
| HILICpos_643.2845_1.66 | HILIC | pos        | 4.94            | 643.2845   |            |      | 4        |         | 0.58320                                 | 0.81992 | 0.17  | 0.19                  | 1.42  | 0.11  | 0.59  | 0.21   | 0.55337                    | 0.81881 | 0.01                     | 0.32                  | 0.16  | 0.12  | 0.02  | 0.31   | 0.13  |   |   |   |
| HILICpos_643.3275_4.07 | HILIC | pos        | 4.07            | 643.3275   |            |      | 4        |         | 0.72660                                 | 0.88852 | 0.08  | 0.00                  | 0.63  | 0.06  | 0.27  | -0.08  | 0.00684                    | 0.17457 | 0.42                     | 0.32                  | 0.46  | 0.50  | 1.02  | 0.09   | -0.30 |   |   |   |
| RPpos_643.3288_11.37   | RP    | pos        | 11.37           | 643.3288   |            |      | 4        |         | 0.64032                                 | 0.84786 | 0.08  | -0.05                 | 0.43  | 0.18  | 0.08  | 1.18   | 0.72055                    | 0.95565 | -0.12                    | 0.30                  | 0.07  | 0.14  | -0.16 | 0.46   | -0.02 |   |   |   |
| HILICpos_643.3519_0.42 | HILIC | pos        | 0.42            | 643.3519   |            |      | 4        |         | 0.51758                                 | 0.78685 | -0.20 | -0.34                 | 0.84  | -0.09 | -0.26 | 0.40   | 0.44467                    | 0.88009 | -0.26                    | -0.17                 | -0.09 | -0.26 | -0.10 | -0.43  | -0.33 |   |   |   |
| RPpos_643.3519_10.8    | RP    | pos        | 10.8            | 643.3519   |            |      | 4        |         | 0.59569                                 | 0.82675 | -0.16 | -0.33                 | 0.82  | -0.05 | -0.19 | 0.30   | 0.46946                    | 0.88973 | -0.23                    | -0.23                 | -0.04 | -0.17 | 0.05  | -0.57  | -0.35 |   |   |   |
| HILICpos_643.3655_5.65 | HILIC | pos        | 5.65            | 643.3655   |            |      | 4        |         | 0.67780                                 | 0.86629 | 0.01  | 0.06                  | 0.33  | 0.39  | -0.09 | -0.81  | 0.01056                    | 0.21823 | 0.72                     | 0.83                  | 0.69  | 1.03  | 1.06  | 0.19   | -0.87 |   |   |   |
| HILICpos_643.3661_5.45 | HILIC | pos        | 5.45            | 643.3661   |            |      | 4        |         | 0.83356                                 | 0.93730 | 0.07  | 0.52                  | 0.44  | 0.08  | 0.09  | -0.54  | 0.00564                    | 0.15742 | 0.91                     | 0.81                  | 1.48  | 1.00  | 2.59  | -0.28  | -0.43 |   |   |   |
| HILICpos_643.3776_5.55 | HILIC | pos        | 5.55            | 643.3776   |            |      | 4        |         | 0.09273                                 | 0.42191 | 0.18  | 0.14                  | 0.32  | 0.18  | 0.22  | 0.11   | 0.39435                    | 0.85426 | 0.00                     | -0.11                 | -0.05 | 0.03  | 0.02  | 0.08   | -0.05 |   |   |   |
| RPpos_643.3794_8.63    | RP    | pos        | 8.63            | 643.3794   |            |      | 4        |         | 0.66171                                 | 0.85810 | 0.14  | 0.16                  | 0.28  | 0.15  | 0.16  | 0.07   | 0.21985                    | 0.73665 | 0.04                     | -0.07                 | -0.05 | 0.07  | 0.11  | 0.09   | 0.00  |   |   |   |
| RPpos_643.3796_8.74    | RP    | pos        | 8.74            | 643.3796   |            |      | 4        |         | 0.02008                                 | 0.25739 | 0.17  | 0.08                  | 0.34  | 0.14  | 0.24  | 0.07   | 0.40386                    | 0.85921 | -0.10                    | -0.15                 | -0.16 | -0.09 | -0.08 | -0.05  | -0.07 |   |   |   |
| HILICpos_643.4037_0.73 | HILIC | pos        | 0.73            | 643.4037   |            |      | 4        |         | 0.05338                                 | 0.35282 | -0.44 | 0.13                  | 0.11  | -0.12 | -0.37 | 0.18   | 0.52104                    | 0.90888 | -0.16                    | -0.19                 | -0.28 | -0.03 | 0.22  | 0.18   | -0.43 |   |   |   |
| HILICpos_643.4068_0.66 | HILIC | pos        | 0.66            | 643.4068   |            |      | 4        |         | 0.83650                                 | 0.93852 | -0.08 | 0.22                  | 0.57  | 0.03  | -0.14 | 0.50   | 0.26123                    | 0.77484 | -0.18                    | -0.10                 | -0.16 | -0.12 | 0.10  | -0.18  | -0.29 |   |   |   |
| RPpos_643.6625_11.37   | RP    | pos        | 11.37           | 643.6625   |            |      | 4        |         | 0.99395                                 | 0.99801 | -0.01 | 0.12                  | 0.39  | -0.01 | 0.01  | 0.47   | 0.80699                    | 0.97034 | -0.10                    | -0.21                 | -0.20 | 0.04  | 0.08  | -0.39  | 0.04  |   |   |   |
| RPneg_644.2745_9.964   | RP    | neg        | 9.964           | 644.2746   |            |      | 4        |         | 0.50655                                 | 0.59838 | 0.19  | 0.01                  | 0.03  | -0.19 | 0.05  | -0.39  | 0.91385                    | 0.98749 | 0.05                     | 0.01                  | 0.11  | 0.02  | 0.13  | 0.06   | -0.08 |   |   |   |
| HILICpos_644.313_5.01  | HILIC | pos        | 5.01            | 644.3130   |            |      | 4        |         | 0.58247                                 | 0.81952 | 0.06  | -0.08                 | 0.25  | 0.24  | 0.03  | 0.10   | 0.34284                    | 0.82748 | -0.10                    | -0.01                 | 0.21  | -0.03 | 0.19  | -0.18  | -0.46 |   |   |   |
| RPpos_644.3682_8.44    | RP    | pos        | 8.44            | 644.3682   |            |      | 4        |         | 0.50953                                 | 0.78222 | 0.18  | -0.22                 | 0.54  | 0.31  | 0.09  | 0.26   | 0.90794                    | 0.98698 | 0.03                     | -0.23                 | 0.15  | 0.10  | 0.35  | -0.15  | 0.01  |   |   |   |
| HILICpos_644.3691_0.56 | HILIC | pos        | 0.56            | 644.3691   |            |      | 4        |         | 0.41980                                 | 0.72298 | 0.24  | -0.26                 | 0.77  | 0.36  | 0.23  | -0.09  | 0.94168                    | 0.99159 | 0.02                     | -0.09                 | -0.04 | -0.07 | 0.20  | -0.14  | 0.26  |   |   |   |
| RPneg_644.39471_10.983 | RP    | neg        | 10.983          | 644.3947   |            |      | 4        |         | 0.00039                                 | 0.03639 | -0.37 | -0.12                 | -0.24 | -0.30 | -0.19 | -0.35  | 0.62909                    | 0.93513 | 0.26                     | 0.57                  | 0.28  | 0.22  | 0.36  | 0.09   | 0.02  |   |   |   |
| RPneg_644.43298_11.191 | RP    | neg        | 11.191          | 644.4330   |            |      | 4        |         | 0.00005                                 | 0.01249 | 3.39  | 0.00                  | 0.59  | 2.36  | 5.90  | 0.07   | 0.79991                    | 0.96943 | 0.08                     | -0.13                 | 0.65  | -0.06 | -0.12 | -0.10  | -0.12 |   |   |   |
| RPpos_644.494_10.47    | RP    | pos        | 10.47           | 644.4940   |            |      | 4        |         | 0.81051                                 | 0.92734 | -0.14 | -0.18                 | 0.02  | 0.14  | 0.21  | 0.24   | 0.91824                    | 0.98853 | -0.04                    | -0.31                 | -0.36 | 0.44  | 0.26  | -0.26  | 0.05  |   |   |   |
| RPpos_644.7822_10.68   | RP    | pos        | 10.68           | 644.7822   |            |      | 4        |         | 0.94665                                 | 0.98034 | 0.05  | -0.12                 | 0.26  | 0.51  | -0.05 | 0.13   | 0.29668                    | 0.79515 | -0.42                    | -0.06                 | -0.26 | -0.19 | -1.16 | -0.41  | 0.27  |   |   |   |
| RPpos_645.2731_7.15    | RP    | pos        | 7.15            | 645.2731   |            |      | 4        |         | 0.64821                                 | 0.85134 | -0.19 | 0.36                  | 0.60  | 0.05  | 0.62  | 0.17   | 0.89177                    | 0.98433 | -0.06                    | 0.99                  | 0.13  | -0.48 | 0.18  | -0.29  | -0.70 |   |   |   |
| RPpos_645.2904_11.72   | RP    | pos        | 11.72           | 645.2904   |            |      | 4        |         | 0.91117                                 | 0.96721 | 0.05  | 1.27                  | 0.21  | -0.33 | 0.61  | -0.26  | 0.87787                    | 0.98241 | 0.05                     | 1.02                  | -0.33 | 0.03  | 0.10  | -0.07  | 0.04  |   |   |   |
| RPpos_645.2919_9.2     | RP    | pos        | 9.2             | 645.2919   |            |      | 4        |         | 0.91954                                 | 0.97060 | 0.26  | 0.28                  | 0.05  | 0.40  | 0.40  | -0.02  | 0.53314                    | 0.91295 | 0.30                     | 0.49                  | 0.53  | 0.33  | 0.33  | -0.03  | -0.16 |   |   |   |
| RPpos_645.2921_9.39    | RP    | pos        | 9.39            | 645.2921   |            |      | 4        |         | 0.57291                                 | 0.81568 | 0.34  | 0.47                  | 0.14  | 0.41  | 0.48  | 0.06   | 0.40458                    | 0.85969 | 0.40                     | 0.33                  | 0.87  | 0.14  | 0.45  | 0.18   | -0.18 |   |   |   |
| RPpos_645.2922_11.53   | RP    | pos        | 11.53           | 645.2922   |            |      | 4        |         | 0.55085                                 | 0.80400 | 0.35  | 0.59                  | 0.19  | 0.38  | 0.47  | -0.11  | 0.11171                    | 0.59419 | 0.73                     | 1.60                  | 1.19  | 0.52  | 1.05  | 0.05   | -0.14 |   |   |   |
| RPneg_645.36121_11.497 | RP    | neg        | 11.497          | 645.3612   |            |      | 4        |         | 0.69711                                 | 0.87607 | 0.02  | 0.17                  | 0.18  | 0.04  | 0.20  | -0.26  | 0.00453                    | 0.14061 | 0.79                     | 0.68                  | 0.77  | 0.69  | 0.91  | 0.72   | 0.63  |   |   |   |
| RPpos_645.3815_10.47   | RP    | pos        | 10.47           | 645.3815   |            |      | 4        |         | 0.47255                                 | 0.76257 | 0.19  | 0.01                  | 0.66  | -0.07 | 0.48  | 0.65   | 0.60087                    | 0.92816 | -0.11                    | -0.15                 | -0.08 | -0.11 | 0.01  | -0.25  | -0.03 |   |   |   |
| RPpos_645.3886_7.28    | RP    | pos        | 7.28            | 645.3886   |            |      | 4        |         | 0.36802                                 | 0.68466 | -0.28 | -0.32                 | 1.02  | -0.19 | -0.41 | 0.45   | 0.22157                    | 0.73822 | -0.42                    | -0.27                 | -0.10 | 0.36  | -0.23 | -0.44  | -0.45 |   |   |   |
| RPpos_645.4973_11.42   | RP    | pos        | 11.42           | 645.4973   |            |      | 4        |         | 0.56790                                 | 0.81298 | -0.13 | -0.02                 | -0.18 | -0.06 | 0.03  | -0.22  | 0.05621                    | 0.46838 | -0.50                    | -0.56                 | -0.49 | -0.53 | -0.48 | -0.35  | -0.54 |   |   |   |
| RPpos_645.512_12.48    | RP    | pos        | 12.48           | 645.5120   |            |      | 4        |         | 0.44711                                 | 0.74237 | -0.17 | -0.12                 | -0.25 | -0.19 | 0.37  | 0.54   | 0.90404                    | 0.98615 | -0.09                    | 0.03                  | 0.23  | 0.04  | -0.18 | -0.32  | -0.07 |   |   |   |
| RPpos_645.688_11.16    | RP    | pos        | 11.16           | 645.6880   |            |      | 4        |         | 0.59212                                 | 0.82492 | -0.18 | -0.37                 | 0.85  | -0.06 | -0.54 | 0.57   | 0.84419                    | 0.97670 | -0.08                    | -0.15                 | -0.05 | -0.08 | 0.25  | -0.42  | -0.02 |   |   |   |
| HILICpos_646.0226_0.45 | HILIC | pos        | 0.45            | 646.0226   |            |      | 4        |         | 0.53365                                 | 0.79545 | 0.15  | 0.04                  | 1.13  | -0.04 | 0.27  | 0.66   | 0.88000                    | 0.98264 | -0.06                    | 0.19                  | -0.02 | -0.09 | -0.01 | -0.09  | -0.20 |   |   |   |
| RPpos_646.0227_11.16   | RP    | pos        | 11.16           | 646.0227   |            |      | 4        |         | 0.70003                                 | 0.87734 | -0.13 | -0.25                 | 1.02  | -0.16 | -0.38 | 0.65   | 0.67706                    | 0.94718 | -0.15                    | -0.25                 | -0.05 | -0.14 | 0.26  | -0.48  | -0.14 |   |   |   |
| HILICneg_646.052_0.48  | HILIC | neg        | 0.48            | 646.0520   |            |      | 4        |         | 0.27040                                 | 0.60669 | 0.31  | 0.38                  | 0.30  | 0.31  | 0.46  | 0.52   | 0.00679                    | 0.17411 | -0.84                    | -0.87                 | -0.82 | -0.75 | -0.80 | -0.95  | -0.50 |   |   |   |
| RPneg_646.25146_9.174  | RP    | neg        | 9.174           | 646.2515   |            |      | 4        |         | 0.00003                                 | 0.00919 | 0.66  | -0.01                 | 1.24  | 0.71  | 0.78  | 0.73   | 0.05500                    | 0.46349 | 0.32                     | -0.18                 | 0.81  | 0.44  | 0.31  | 0.34   | -0.57 |   |   |   |
| HILICpos_646.3096_1.49 | HILIC | pos        | 1.49            | 646.3096   |            |      | 4        |         | 0.99045                                 | 0.99648 | 0.07  | -0.03                 | 0.87  | 0.09  | -0.04 | -0.36  | 0.00306                    | 0.11113 | 0.66                     | 0.59                  | 0.64  | 1.23  | 1.08  | 0.24   | -0.70 |   |   |   |
| RPneg_646.31885_8.751  | RP    | neg        | 8.751           | 646.3189   |            |      | 4        |         | 0.00330                                 | 0.11850 | 0.15  | 0.16                  | 0.32  | 0.09  | 0.19  | 0.12   | 0.56596                    | 0.92078 | -0.07                    | -0.16                 | -0.09 | -0.04 | -0.07 | -0.03  | -0.07 |   |   |   |
| RPneg_646.32178_8.633  | RP    | neg        | 8.633           | 646.3218   |            |      | 4        |         | 0.96778                                 | 0.98827 | 0.07  | 0.09                  | 0.13  | 0.03  | 0.16  | 0.0    |                            |         |                          |                       |       |       |       |        |       |   |   |   |

| Feature_ID             | Mode  | Ionization | Average_Rt.min | Average_Mz | Metabolite | MSMS | ID_Level | HMDB_ID | IV-Alcohol self-administration (IV-ASA) |         |       |       |       |                       |       |       |         |         | IV-Alcohol clamp (IV-AC)   |       |       |       |       |                       |       |   |   |   |
|------------------------|-------|------------|----------------|------------|------------|------|----------|---------|-----------------------------------------|---------|-------|-------|-------|-----------------------|-------|-------|---------|---------|----------------------------|-------|-------|-------|-------|-----------------------|-------|---|---|---|
|                        |       |            |                |            |            |      |          |         | Area Under the Curve (AUC)              |         |       |       |       | IV-Ghrelin or Placebo |       |       |         |         | Area Under the Curve (AUC) |       |       |       |       | IV-Ghrelin or Placebo |       |   |   |   |
|                        |       |            |                |            |            |      |          |         | p                                       | q       | d     | d     | d     | d                     | d     | d     | d       | d       | d                          | d     | d     | d     | d     | d                     | d     | d | d | d |
| HILICpos_650.2791_1.58 | HILIC | pos        | 1.58           | 650.2791   |            |      | 4        |         | 0.9195                                  | 0.9706  | 0.04  | 0.01  | 0.59  | 0.05                  | 0.21  | -0.25 | 0.00190 | 0.08398 | 0.81                       | 0.30  | 0.67  | 1.01  | 2.68  | 0.23                  | -0.14 |   |   |   |
| RPpos_650.3666_10.95   | RP    | pos        | 10.95          | 650.3666   |            |      | 4        |         | 0.8425                                  | 0.94101 | -0.08 | -0.17 | 0.84  | -0.08                 | -0.16 | 0.60  | 0.65957 | 0.94217 | -0.15                      | -0.26 | 0.11  | -0.04 | -0.08 | -0.52                 | -0.30 |   |   |   |
| HILICpos_650.3674_0.44 | HILIC | pos        | 0.44           | 650.3674   |            |      | 4        |         | 0.35975                                 | 0.67830 | -0.23 | -0.38 | 0.82  | -0.30                 | -0.28 | 0.45  | 0.54327 | 0.91507 | -0.18                      | -0.20 | 0.03  | -0.24 | 0.14  | -0.46                 | -0.39 |   |   |   |
| RPpos_650.3704_10.52   | RP    | pos        | 10.52          | 650.3704   |            |      | 4        |         | 0.60307                                 | 0.83062 | -0.15 | -0.26 | 0.79  | -0.11                 | -0.14 | 0.48  | 0.35583 | 0.83381 | -0.24                      | -0.21 | -0.06 | -0.09 | -0.01 | -0.58                 | -0.47 |   |   |   |
| HILICpos_650.3771_0.84 | HILIC | pos        | 0.84           | 650.3771   |            |      | 4        |         | 0.51358                                 | 0.78440 | 0.19  | 0.05  | 0.68  | 0.19                  | 0.38  | 0.19  | 0.39    | 0.97236 | 0.94222                    | -0.10 | -0.16 | -0.02 | -0.27 | 0.13                  | -0.17 |   |   |   |
| RPpos_650.4064_9.94    | RP    | pos        | 9.94           | 650.4064   |            |      | 4        |         | 0.25579                                 | 0.59409 | -0.17 | 0.65  | -0.41 | 0.21                  | 0.37  | 0.52  | 0.68564 | 0.94888 | 0.23                       | -0.22 | 0.07  | 0.08  | 0.37  | -0.27                 | -0.15 |   |   |   |
| RPpos_650.4139_7.2     | RP    | pos        | 7.2            | 650.4139   |            |      | 4        |         | 0.60715                                 | 0.83260 | -0.19 | -0.13 | 1.01  | -0.04                 | -0.29 | 0.31  | 0.29861 | 0.80069 | -0.35                      | -0.24 | -0.02 | -0.29 | -0.11 | -0.52                 | -0.45 |   |   |   |
| RPpos_650.4316_6.98    | RP    | pos        | 6.98           | 650.4316   |            |      | 4        |         | 0.24422                                 | 0.58521 | -0.32 | -0.14 | 0.68  | -0.19                 | -0.12 | 0.04  | 0.58949 | 0.92655 | -0.22                      | -0.37 | -0.01 | -0.04 | 0.25  | -0.60                 | -0.42 |   |   |   |
| RPneg_650.45807_11.545 | RP    | neg        | 11.545         | 650.4581   |            |      | 4        |         | 0.19495                                 | 0.54005 | -0.30 | -0.17 | -0.03 | 0.17                  | 0.01  | 0.07  | 0.98854 | 0.99810 | 0.03                       | 0.08  | -0.38 | -0.38 | 0.14  | 0.41                  | 0.70  |   |   |   |
| RPpos_650.4595_10.58   | RP    | pos        | 10.58          | 650.4595   |            |      | 4        |         | 0.40947                                 | 0.71503 | -0.14 | -0.06 | 0.20  | 0.17                  | -0.12 | -0.24 | 0.18994 | 0.70521 | -0.72                      | 0.16  | -0.89 | -1.25 | -0.54 | -0.30                 | 0.32  |   |   |   |
| RPpos_650.475_11.77    | RP    | pos        | 11.77          | 650.4750   |            |      | 4        |         | 0.87726                                 | 0.95405 | -0.04 | -0.22 | 0.02  | -0.01                 | 0.36  | -0.41 | 0.43410 | 0.87551 | -0.03                      | -0.27 | -0.07 | 0.15  | 0.04  | 0.18                  | -0.37 |   |   |   |
| RPpos_650.701_10.95    | RP    | pos        | 10.95          | 650.7010   |            |      | 4        |         | 0.89570                                 | 0.96214 | -0.06 | -0.33 | 0.88  | -0.07                 | -0.09 | 0.53  | 0.73773 | 0.95893 | -0.11                      | -0.20 | 0.07  | -0.06 | 0.10  | -0.43                 | -0.19 |   |   |   |
| RPpos_651.0088_11.59   | RP    | pos        | 11.59          | 651.0088   |            |      | 4        |         | 0.73105                                 | 0.89084 | 0.04  | -0.21 | 0.74  | -0.26                 | 0.25  | 0.39  | 0.72564 | 0.95609 | -0.16                      | -0.34 | -0.11 | -0.03 | 0.06  | -0.28                 | -0.14 |   |   |   |
| RPpos_651.0318_10.95   | RP    | pos        | 10.95          | 651.0318   |            |      | 4        |         | 0.81839                                 | 0.93081 | 0.03  | -0.36 | 1.17  | 0.20                  | -0.03 | 0.29  | 0.54112 | 0.91464 | -0.19                      | -0.29 | -0.02 | -0.12 | -0.07 | -0.35                 | -0.37 |   |   |   |
| RPpos_651.1204_11.47   | RP    | pos        | 11.47          | 651.1204   |            |      | 4        |         | 0.27293                                 | 0.60896 | -0.45 | -0.29 | -0.36 | 0.61                  | -0.12 | 0.10  | 0.36508 | 0.83811 | 0.10                       | -0.06 | -0.11 | 0.06  | 0.38  | 0.42                  | 0.20  |   |   |   |
| RPpos_651.1315_11.27   | RP    | pos        | 11.27          | 651.1315   |            |      | 4        |         | 0.67596                                 | 0.86524 | -0.12 | -0.21 | 0.47  | -0.06                 | 0.01  | 0.51  | 0.80521 | 0.97005 | -0.14                      | 0.03  | -0.12 | 0.05  | 0.20  | -0.61                 | -0.22 |   |   |   |
| RPpos_651.13405_11.59  | RP    | pos        | 11.59          | 651.13405  |            |      | 4        |         | 0.50801                                 | 0.78116 | 0.15  | -0.36 | 0.65  | 0.28                  | 0.08  | 0.54  | 0.78810 | 0.92331 | -0.20                      | -0.17 | -0.41 | 0.05  | 0.01  | -0.45                 | -0.06 |   |   |   |
| RPpos_651.16749_11.59  | RP    | pos        | 11.59          | 651.16749  |            |      | 4        |         | 0.86203                                 | 0.94834 | 0.01  | -0.43 | 0.53  | 0.16                  | 0.21  | 0.47  | 0.54816 | 0.91689 | -0.21                      | -0.13 | -0.36 | -0.13 | 0.09  | -0.45                 | -0.14 |   |   |   |
| HILICneg_652.1305_0.48 | HILIC | neg        | 0.48           | 652.1305   |            |      | 4        |         | 0.05705                                 | 0.36031 | 0.47  | 0.47  | 0.32  | 0.61                  | 0.47  | 0.85  | 0.01470 | 0.25818 | -0.83                      | -0.82 | -0.22 | -0.79 | -0.86 | -0.73                 | -0.48 |   |   |   |
| RPpos_652.1888_9.96    | RP    | pos        | 9.96           | 652.1888   |            |      | 4        |         | 0.67211                                 | 0.86534 | 0.11  | -0.06 | -0.43 | 0.02                  | 0.65  | -0.68 | 0.68840 | 0.94962 | -0.15                      | 0.24  | 0.54  | -1.25 | -0.56 | 0.76                  | -0.04 |   |   |   |
| HILICneg_652.2243_1.91 | HILIC | neg        | 1.91           | 652.2243   |            |      | 4        |         | 0.58922                                 | 0.82348 | -0.17 | -0.79 | 0.26  | 0.40                  | 0.46  | -0.17 | 0.11481 | 0.59882 | 0.88                       | 0.04  | 0.05  | 0.90  | 1.26  | 0.75                  | -0.20 |   |   |   |
| RPneg_652.29089_10.569 | RP    | neg        | 10.569         | 652.2909   |            |      | 4        |         | 0.00267                                 | 0.10630 | -0.55 | -0.07 | -0.19 | -0.40                 | -0.32 | -0.39 | 0.67487 | 0.94679 | 0.19                       | 0.14  | 0.14  | 0.19  | 0.32  | 0.25                  | -0.01 |   |   |   |
| RPneg_652.29498_10.057 | RP    | neg        | 10.057         | 652.2950   |            |      | 4        |         | 0.43604                                 | 0.73431 | -0.12 | 0.06  | 0.02  | 0.03                  | -0.05 | -0.14 | 0.76536 | 0.96353 | 0.15                       | 0.04  | 0.21  | -0.22 | 0.46  | 0.34                  | 0.20  |   |   |   |
| HILICpos_652.3283_4.6  | HILIC | pos        | 4.6            | 652.3283   |            |      | 4        |         | 0.48254                                 | 0.76589 | 0.18  | 0.09  | 0.80  | 0.29                  | 0.25  | -0.27 | 0.02161 | 0.31072 | 0.35                       | 0.17  | 0.39  | 0.47  | 0.82  | 0.06                  | -0.51 |   |   |   |
| RPpos_652.3503_10.95   | RP    | pos        | 10.95          | 652.3503   |            |      | 4        |         | 0.73800                                 | 0.89426 | 0.04  | -0.12 | 1.02  | -0.07                 | 0.04  | 0.69  | 0.22785 | 0.74490 | -0.39                      | -0.48 | -0.27 | -0.30 | -0.43 | -0.41                 | 0.02  |   |   |   |
| RPpos_652.3569_9.09    | RP    | pos        | 9.09           | 652.3569   |            |      | 4        |         | 0.72719                                 | 0.88890 | 0.11  | 0.06  | 0.54  | 0.05                  | 0.31  | 0.96  | 0.42315 | 0.86996 | -0.25                      | -0.23 | -0.01 | -0.24 | -0.23 | -0.64                 | -0.31 |   |   |   |
| HILICpos_652.3572_0.42 | HILIC | pos        | 0.42           | 652.3572   |            |      | 4        |         | 0.96050                                 | 0.98600 | 0.04  | -0.05 | 0.50  | 0.18                  | 0.14  | 0.88  | 0.67936 | 0.94725 | -0.15                      | -0.20 | 0.04  | -0.20 | -0.13 | -0.15                 | -0.61 |   |   |   |
| HILICpos_652.4103_0.62 | HILIC | pos        | 0.62           | 652.4103   |            |      | 4        |         | 0.17526                                 | 0.52072 | -0.34 | -0.14 | 0.44  | -0.32                 | -0.28 | 0.17  | 0.00934 | 0.20585 | -0.41                      | -0.36 | -0.20 | -0.53 | -0.12 | -0.07                 | -0.38 |   |   |   |
| RPpos_652.4106_5.55    | RP    | pos        | 5.55           | 652.4106   |            |      | 4        |         | 0.30845                                 | 0.63711 | -0.28 | -0.03 | 0.62  | -0.34                 | -0.34 | 0.29  | 0.00176 | 0.07964 | -0.43                      | -0.30 | -0.21 | -0.53 | -0.16 | -0.13                 | -0.51 |   |   |   |
| RPpos_652.6841_10.95   | RP    | pos        | 10.95          | 652.6841   |            |      | 4        |         | 0.60839                                 | 0.83311 | -0.15 | -0.34 | 0.93  | -0.38                 | -0.02 | 0.51  | 0.52336 | 0.90917 | -0.18                      | -0.28 | 0.19  | -0.13 | -0.41 | -0.35                 | 0.11  |   |   |   |
| RPpos_652.8475_10.52   | RP    | pos        | 10.52          | 652.8475   |            |      | 4        |         | 0.77269                                 | 0.91041 | -0.09 | -0.18 | 0.69  | -0.08                 | -0.15 | 0.73  | 0.30303 | 0.80384 | -0.28                      | -0.20 | -0.12 | -0.09 | -0.18 | -0.67                 | -0.39 |   |   |   |
| HILICneg_653.1501_0.48 | HILIC | neg        | 0.48           | 653.1501   |            |      | 4        |         | 0.13467                                 | 0.47388 | 0.38  | 0.36  | 0.46  | 0.32                  | 0.38  | 0.78  | 0.10726 | 0.58531 | -0.64                      | -0.65 | -0.63 | -0.66 | -0.65 | -0.53                 | -0.46 |   |   |   |
| RPneg_653.224_8.95     | RP    | neg        | 8.95           | 653.2240   |            |      | 4        |         | 0.08662                                 | 0.69907 | 0.40  | -0.72 | 0.75  | 0.19                  | 0.48  | -0.15 | 0.13834 | 0.63846 | 0.81                       | 0.80  | 0.00  | 1.34  | 0.31  | 0.78                  | 0.07  |   |   |   |
| RPpos_653.3702_7.08    | RP    | pos        | 7.08           | 653.3702   |            |      | 4        |         | 0.65936                                 | 0.87543 | -0.11 | -0.34 | 0.58  | 0.07                  | -0.23 | 0.30  | 0.83872 | 0.97596 | 0.01                       | 0.03  | 0.23  | 0.33  | 0.06  | -0.93                 | -0.17 |   |   |   |
| RPpos_653.372_6.67     | RP    | pos        | 6.67           | 653.3720   |            |      | 4        |         | 0.91305                                 | 0.96804 | 0.01  | 0.61  | 0.26  | 0.38                  | -0.04 | 0.51  | 0.75575 | 0.96233 | 0.01                       | -0.10 | 0.02  | 0.47  | 0.01  | -0.44                 | -0.28 |   |   |   |
| RPpos_653.8104_11.27   | RP    | pos        | 11.27          | 653.8104   |            |      | 4        |         | 0.59269                                 | 0.82527 | -0.11 | 0.31  | 0.71  | -0.34                 | 0.02  | 0.44  | 0.81591 | 0.97209 | -0.14                      | -0.07 | 0.00  | 0.14  | -0.33 | -0.56                 | -0.05 |   |   |   |
| RPneg_654.23407_10.23  | RP    | neg        | 10.23          | 654.2341   |            |      | 4        |         | 0.79358                                 | 0.91970 | -0.03 | 0.16  | 0.30  | -0.19                 | 0.20  | 0.49  | 0.73892 | 0.95923 | 0.05                       | -0.07 | -0.09 | 0.14  | -0.01 | 0.32                  | 0.07  |   |   |   |
| RPneg_654.29486_10.659 | RP    | neg        | 10.659         | 654.2949   |            |      | 4        |         | 0.02051                                 | 0.25911 | -0.46 | -0.29 | 0.21  | -0.44                 | -0.58 | -0.35 | 0.37281 | 0.84231 | 0.11                       | 0.47  | -0.03 | 0.13  | 0.10  | 0.06                  | 0.02  |   |   |   |
| RPneg_654.30237_9.839  | RP    | neg        | 9.839          | 654.3024   |            |      | 4        |         | 0.17346                                 | 0.51891 | -0.21 | 0.11  | -0.22 | -0.13                 | -0.10 | -0.28 | 0.68353 | 0.94838 | -0.08                      | 0.20  | -0.24 | -0.06 | 0.06  | -0.05                 | -0.07 |   |   |   |
| RPneg_654.30243_9.965  | RP    | neg        | 9.965          | 654.3024   |            |      | 4        |         | 0.17891                                 | 0.52425 | -0.24 | -0.06 | -0.03 | -0.16                 | -0.07 | -0.29 | 0.92937 | 0.98969 | 0.01                       | 0.00  | 0.11  | 0.04  | 0.06  | 0.10                  | -0.13 |   |   |   |
| RPneg_654.30646_10.78  | RP    | neg        | 10.78          | 654.3065   |            |      | 4        |         | 0.01668                                 | 0.23842 | -0.43 | 0.01  | -0.13 | -0.32                 | -0.25 | -0.45 | 0.20780 | 0.72383 | -0.01                      | 0.13  | -0.03 | -0.02 | 0.11  | -0.05                 | -0.16 |   |   |   |
| RPpos_654.3067_10.37   | RP    | pos        | 10.37          | 654.3067   |            |      | 4        |         | 0.03179                                 | 0.29859 | -0.34 | -0.02 | -0.02 | -0.30                 | -0.01 | -0.23 | 0.93748 | 0.99028 | 0.10                       | 0.32  | -0.08 | 0.23  | 0.25  | 0.22                  | -0.41 |   |   |   |
| RPneg_654.30743_10.894 | RP    | neg        | 10.894         | 654.3074   |            |      | 4        |         | 0.01475                                 | 0.22828 | -0.64 | 0.09  | -0.12 | -0.38                 | -1.00 | -0.34 | 0.50264 | 0.90295 | 0.03                       | 0.20  | -0.09 | -0.01 | 0.19  | 0.17                  | -0.14 |   |   |   |
| HILICpos_654.3302_0.37 | HILIC | pos        | 0.37           | 654.3302   |            |      | 4        |         | 0.52168                                 | 0.78871 | -0.21 | 0.03  | -0.54 | 0.35                  | 1.20  | -0.11 | 0.44165 | 0.87936 | -0.15                      | -0.03 | -0.35 | -0.52 | 0.31  | 0.32                  | -0.12 |   |   |   |
| RPpos_654.3303_10.49   | RP    | pos        | 10.49          | 654.3303   |            |      | 4        |         | 0.87309                                 | 0.95263 | -0.06 | 0.02  | -0.62 | 0.57                  | 1.25  | 0.23  | 0.33019 | 0.82049 | -0.19                      | -0.17 | -0.59 | -0.22 | 0.01  | 0.26                  | -0.20 |   |   |   |
| HILICpos_654.3314_1.06 | HILIC | pos        | 1.06           | 654.3314   |            |      | 4        |         | 0.97078                                 | 0.98887 | 0.01  | 0.29  | 0.17  | 0.19                  | 0.36  | -0.44 | 0.15186 | 0.65756 | 0.40                       | -0.73 | 0.14  | 0.42  | 0.58  | 0.33                  | 0.00  |   |   |   |
| RPpos_655.045_10.72    | RP    | pos        | 10.72          | 655.0450   |            |      | 4        |         | 0.93546                                 | 0.97680 | -0.02 | -0.35 | 0.81  | 0.02                  | 0.04  | 0.52  | 0.35891 | 0.83441 | -0.25                      | -0.26 | 0.17  | -0.22 | 0.08  | -0.54                 | 0.21  |   |   |   |
| RPpos_655.119_10.54    | RP    | pos        | 10.54          | 655.1190   |            |      | 4        |         | 0.86357                                 | 0.94909 | 0.09  | -0.06 | 0.40  | -0.01                 | 0.12  | 0.51  | 0.49775 | 0.90072 | -0.36                      | 0.45  | -0.60 | 0.27  | -0.18 | -0.58                 | 1.34  |   |   |   |
| RPpos_655.2008_7.35    | RP    | pos        | 7.35           | 655.2008   |            |      | 4        |         | 0.07658                                 | 0.39745 | -0.30 | -0.12 | 0.32  | -0.30                 | -0.48 | 0.76  | 0.25055 | 0.76696 | 0.34                       | 0.13  | 0.32  | 0.18  | 0.46  | 0.36                  | 0     |   |   |   |







| Feature_ID | Cneg | Mode   | Ionization | Average Rt.min. | Average Mz | Metabolite | MSMS | ID_Level | HMDB_ID | IV-Alcohol self-administration (IV-ASA) |       |       |        |       |                       |       |          |         |       | IV-Alcohol clamp (IV-AC) |       |       |       |         |                            |        |   |   |  |                       |  |  |  |  |        |  |  |  |  |
|------------|------|--------|------------|-----------------|------------|------------|------|----------|---------|-----------------------------------------|-------|-------|--------|-------|-----------------------|-------|----------|---------|-------|--------------------------|-------|-------|-------|---------|----------------------------|--------|---|---|--|-----------------------|--|--|--|--|--------|--|--|--|--|
|            |      |        |            |                 |            |            |      |          |         | Area Under the Curve (AUC)              |       |       |        |       | IV-Ghrelin or Placebo |       |          |         |       | BrAC=0                   |       |       |       |         | Area Under the Curve (AUC) |        |   |   |  | IV-Ghrelin or Placebo |  |  |  |  | BrAC=0 |  |  |  |  |
|            |      |        |            |                 |            |            |      |          |         | Baseline                                |       |       | IV-ASA |       | BrAC=0                |       | Baseline |         |       | Post-LD                  |       | IV-AC |       | Post-AC |                            | BrAC=0 |   |   |  |                       |  |  |  |  |        |  |  |  |  |
|            |      |        |            |                 |            |            |      |          |         | p                                       | q     | d     | d      | d     | d                     | d     | d        | d       | d     | d                        | d     | d     | d     | d       | d                          | d      | d | d |  |                       |  |  |  |  |        |  |  |  |  |
| HILIC      | neg  | 1.37   | 676.3035   |                 |            |            | 4    |          | 0.23955 | 0.58092                                 | -0.38 | -0.08 | -0.59  | 0.27  | -0.24                 | 0.14  | 0.48962  | 0.89836 | -0.17 | 0.19                     | -0.60 | 0.04  | 0.03  | -0.20   | -0.53                      |        |   |   |  |                       |  |  |  |  |        |  |  |  |  |
| RPpos      | pos  | 11.83  | 676.3484   |                 |            |            | 4    |          | 0.69638 | 0.87566                                 | 0.07  | -0.13 | 0.65   | -0.11 | 0.19                  | 0.61  | 0.76704  | 0.96401 | -0.13 | -0.23                    | -0.11 | -0.09 | 0.05  | -0.27   | -0.20                      |        |   |   |  |                       |  |  |  |  |        |  |  |  |  |
| HILICpos   | pos  | 0.42   | 676.4460   |                 |            |            | 4    |          | 0.50735 | 0.78065                                 | 0.21  | 0.41  | 0.48   | 0.25  | 0.36                  | 0.07  | 0.46290  | 0.88657 | -0.26 | 0.05                     | -0.06 | -0.35 | -0.33 | -0.41   | 0.17                       |        |   |   |  |                       |  |  |  |  |        |  |  |  |  |
| RPpos      | pos  | 11.86  | 676.4915   |                 |            |            | 4    |          | 0.72893 | 0.89663                                 | 0.13  | 0.17  | 0.50   | 0.26  | 0.19                  | 0.02  | 0.73473  | 0.95858 | 0.15  | -0.11                    | -0.05 | 0.17  | 0.17  | 1.23    | 0.27                       |        |   |   |  |                       |  |  |  |  |        |  |  |  |  |
| RPpos      | pos  | 11.83  | 676.6810   |                 |            |            | 4    |          | 0.78023 | 0.91391                                 | 0.07  | -0.12 | 0.01   | 0.07  | -0.19                 | 0.09  | 0.69060  | 0.93988 | -0.18 | 0.01                     | -0.22 | 0.05  | -0.11 | -0.64   | -0.38                      |        |   |   |  |                       |  |  |  |  |        |  |  |  |  |
| RPpos      | pos  | 5.73   | 677.0056   |                 |            |            | 4    |          | 0.57790 | 0.67619                                 | -0.29 | -0.25 | -0.18  | 0.08  | 0.22                  | -0.05 | 0.66520  | 0.94388 | 0.03  | 0.33                     | 0.15  | 0.16  | 0.32  | 0.01    |                            |        |   |   |  |                       |  |  |  |  |        |  |  |  |  |
| RPneg      | neg  | 7.356  | 677.2130   |                 |            |            | 4    |          | 0.02556 | 0.27934                                 | -0.34 | -0.15 | 0.23   | -0.40 | -0.38                 | 0.73  | 0.06559  | 0.49511 | 0.41  | 0.01                     | 0.22  | -0.16 | 0.91  | 0.94    | 0.09                       |        |   |   |  |                       |  |  |  |  |        |  |  |  |  |
| RPneg      | neg  | 11.491 | 677.3003   |                 |            |            | 4    |          | 0.54039 | 0.79830                                 | 0.07  | 0.16  | 0.22   | 0.01  | 0.38                  | -0.35 | 0.03225  | 0.37117 | 0.65  | 0.43                     | 0.56  | 0.56  | 0.82  | 0.66    | 0.34                       |        |   |   |  |                       |  |  |  |  |        |  |  |  |  |
| RPpos      | pos  | 11.73  | 677.3203   |                 |            |            | 4    |          | 0.39280 | 0.70316                                 | 0.44  | 0.60  | 0.33   | 0.42  | 0.59                  | -0.18 | 0.07931  | 0.52842 | 0.87  | 1.16                     | 0.63  | 1.20  | 1.17  | 0.30    | -0.09                      |        |   |   |  |                       |  |  |  |  |        |  |  |  |  |
| RPpos      | pos  | 5.73   | 677.3403   |                 |            |            | 4    |          | 0.25027 | 0.58921                                 | -0.13 | -0.21 | -0.21  | -0.02 | 0.22                  | 0.01  | 0.59400  | 0.92734 | 0.09  | 0.04                     | -0.07 | 0.24  | 0.73  | -0.03   | -0.26                      |        |   |   |  |                       |  |  |  |  |        |  |  |  |  |
| RPpos      | pos  | 12.38  | 677.5575   |                 |            |            | 4    |          | 0.51744 | 0.78678                                 | -0.14 | 0.45  | -0.05  | -0.21 | 0.12                  | -0.20 | 0.01916  | 0.29304 | -0.43 | -0.28                    | -0.13 | -0.76 | -0.40 | -0.21   | -0.66                      |        |   |   |  |                       |  |  |  |  |        |  |  |  |  |
| RPpos      | pos  | 11.83  | 677.6655   |                 |            |            | 4    |          | 0.45674 | 0.74857                                 | 0.11  | -0.15 | 1.04   | -0.02 | 0.01                  | 0.35  | 0.64070  | 0.93638 | -0.20 | -0.21                    | -0.32 | -0.41 | 0.03  | -0.21   | 0.07                       |        |   |   |  |                       |  |  |  |  |        |  |  |  |  |
| RPpos      | pos  | 11.05  | 677.8087   |                 |            |            | 4    |          | 0.23029 | 0.57179                                 | 0.56  | 0.26  | 0.49   | 0.86  | 0.37                  | 0.21  | 0.79589  | 0.96826 | -0.14 | -0.05                    | 0.49  | 0.00  | -0.02 | -0.58   | 0.85                       |        |   |   |  |                       |  |  |  |  |        |  |  |  |  |
| RPpos      | pos  | 11.05  | 678.1438   |                 |            |            | 4    |          | 0.53703 | 0.79711                                 | 0.28  | 0.48  | 0.41   | 0.37  | 0.17                  | 0.08  | 0.73388  | 0.95858 | -0.22 | 0.30                     | 0.08  | 0.31  | -0.33 | -0.53   | 0.56                       |        |   |   |  |                       |  |  |  |  |        |  |  |  |  |
| RPneg      | neg  | 10.712 | 678.3095   |                 |            |            | 4    |          | 0.04665 | 0.33913                                 | -0.39 | -0.17 | -0.23  | -0.28 | -0.06                 | -0.22 | 0.28385  | 0.79232 | -0.04 | 0.35                     | -0.07 | -0.12 | 0.21  | -0.09   | -0.28                      |        |   |   |  |                       |  |  |  |  |        |  |  |  |  |
| HILICpos   | pos  | 2.03   | 678.3323   |                 |            |            | 4    |          | 0.20767 | 0.55090                                 | 0.25  | 0.11  | 0.86   | 0.19  | 0.29                  | -0.12 | 0.00572  | 0.15908 | 0.54  | 0.13                     | 0.50  | 1.01  | 0.69  | 0.39    | -0.23                      |        |   |   |  |                       |  |  |  |  |        |  |  |  |  |
| HILICpos   | pos  | 0.62   | 678.5058   |                 |            |            | 4    |          | 0.70867 | 0.88110                                 | -0.11 | 0.19  | 0.02   | -0.23 | 0.22                  | 0.06  | 0.22429  | 0.74096 | -0.30 | -0.31                    | -0.23 | -0.45 | -0.09 | -0.41   | -0.62                      |        |   |   |  |                       |  |  |  |  |        |  |  |  |  |
| RPpos      | pos  | 12.22  | 678.5065   |                 |            |            | 4    |          | 0.67352 | 0.86394                                 | -0.11 | 0.13  | -0.06  | -0.14 | 0.15                  | -0.11 | 0.25893  | 0.77346 | -0.30 | -0.35                    | -0.28 | -0.27 | -0.16 | -0.34   | -0.65                      |        |   |   |  |                       |  |  |  |  |        |  |  |  |  |
| RPneg      | neg  | 8.675  | 679.1511   |                 |            |            | 4    |          | 0.41263 | 0.71756                                 | -0.26 | 0.12  | 0.55   | 0.10  | 0.52                  | 0.21  | 0.08268  | 0.53598 | -0.28 | 0.12                     | 0.53  | 1.89  | 0.79  | -0.09   | -0.58                      |        |   |   |  |                       |  |  |  |  |        |  |  |  |  |
| RPneg      | neg  | 8.596  | 679.1522   |                 |            |            | 4    |          | 0.18868 | 0.53491                                 | -0.44 | -0.06 | -0.21  | 0.07  | 0.70                  | 0.05  | 0.18699  | 0.70221 | -0.13 | 0.11                     | 0.14  | 0.14  | 0.09  | -0.38   | -0.55                      |        |   |   |  |                       |  |  |  |  |        |  |  |  |  |
| RPneg      | neg  | 9.653  | 679.1898   |                 |            |            | 4    |          | 0.42297 | 0.72491                                 | -0.30 | 0.05  | 0.56   | 0.46  | 0.63                  | 0.31  | 0.22205  | 0.73863 | -0.26 | 0.11                     | 0.24  | -0.30 | 0.37  | 1.22    | -0.82                      |        |   |   |  |                       |  |  |  |  |        |  |  |  |  |
| RPneg      | neg  | 5.548  | 679.3751   |                 |            |            | 4    |          | 0.68556 | 0.87027                                 | -0.15 | 0.09  | 0.60   | -0.08 | -0.14                 | 0.27  | 0.00039  | 0.03117 | -0.46 | -0.43                    | -0.12 | -0.44 | -0.12 | -0.14   | -0.57                      |        |   |   |  |                       |  |  |  |  |        |  |  |  |  |
| RPpos      | pos  | 10.18  | 679.3996   |                 |            |            | 4    |          | 0.66098 | 0.85799                                 | -0.08 | 0.24  | 0.43   | 0.12  | 0.11                  | 0.67  | 0.21888  | 0.73540 | -0.14 | -0.25                    | 0.01  | -0.19 | 0.02  | -0.30   | -0.17                      |        |   |   |  |                       |  |  |  |  |        |  |  |  |  |
| RPpos      | pos  | 7.25   | 679.4122   |                 |            |            | 4    |          | 0.70624 | 0.88014                                 | -0.09 | -0.27 | 0.56   | -0.11 | -0.10                 | 0.32  | 0.71513  | 0.95379 | 0.05  | 0.12                     | 0.05  | 0.21  | 0.06  | -0.50   | -0.04                      |        |   |   |  |                       |  |  |  |  |        |  |  |  |  |
| RPpos      | pos  | 10.7   | 679.4770   |                 |            |            | 4    |          | 0.92850 | 0.97447                                 | 0.05  | 0.23  | 0.18   | -0.05 | 0.45                  | 0.09  | 0.84961  | 0.97748 | -0.15 | 0.01                     | 0.08  | -0.14 | -0.43 | -0.20   | 0.60                       |        |   |   |  |                       |  |  |  |  |        |  |  |  |  |
| RPpos      | pos  | 10.94  | 679.7147   |                 |            |            | 4    |          | 0.89698 | 0.96255                                 | 0.00  | -0.34 | 1.08   | 0.11  | -0.15                 | 0.25  | 0.89991  | 0.98550 | -0.04 | -0.22                    | 0.19  | 0.02  | -0.07 | -0.20   | -0.19                      |        |   |   |  |                       |  |  |  |  |        |  |  |  |  |
| RPpos      | pos  | 10.94  | 680.0510   |                 |            |            | 4    |          | 0.97703 | 0.99097                                 | -0.03 | -0.12 | 0.67   | -0.04 | -0.01                 | 0.52  | 0.46183  | 0.88613 | -0.21 | -0.22                    | 0.06  | -0.22 | -0.07 | -0.58   | -0.25                      |        |   |   |  |                       |  |  |  |  |        |  |  |  |  |
| RPneg      | neg  | 5.502  | 680.3143   |                 |            |            | 4    |          | 0.86188 | 0.94832                                 | 0.04  | 0.01  | 0.19   | 0.93  | 0.07                  | 0.44  | 0.28800  | 0.79407 | 0.45  | 0.61                     | 0.69  | 0.43  | 0.65  | 0.15    | -0.18                      |        |   |   |  |                       |  |  |  |  |        |  |  |  |  |
| RPneg      | neg  | 10.228 | 680.3156   |                 |            |            | 4    |          | 0.00864 | 0.18262                                 | -0.49 | -0.33 | -0.35  | -0.48 | -0.12                 | -0.38 | 0.17416  | 0.68828 | -0.08 | 0.05                     | 0.00  | -0.18 | 0.12  | -0.08   | -0.23                      |        |   |   |  |                       |  |  |  |  |        |  |  |  |  |
| RPneg      | neg  | 10.126 | 680.3206   |                 |            |            | 4    |          | 0.02002 | 0.25728                                 | -0.38 | -0.35 | -0.30  | -0.27 | -0.16                 | -0.44 | 0.76114  | 0.96260 | 0.09  | 0.18                     | -0.07 | 0.44  | 0.09  | 0.20    | -0.53                      |        |   |   |  |                       |  |  |  |  |        |  |  |  |  |
| HILICpos   | pos  | 0.66   | 680.3473   |                 |            |            | 4    |          | 0.39886 | 0.70798                                 | -0.32 | -0.15 | -0.23  | -0.39 | 0.05                  | -0.34 | 0.07382  | 0.51671 | -0.30 | -0.10                    | -0.20 | -0.50 | -0.10 | -0.35   | -0.27                      |        |   |   |  |                       |  |  |  |  |        |  |  |  |  |
| RPneg      | neg  | 6.292  | 680.3496   |                 |            |            | 4    |          | 0.91700 | 0.96979                                 | 0.00  | 0.02  | 0.98   | -0.12 | 0.20                  | -0.34 | 0.01846  | 0.28944 | 0.51  | 0.55                     | 0.43  | 0.90  | 1.88  | 0.08    | -0.97                      |        |   |   |  |                       |  |  |  |  |        |  |  |  |  |
| RPpos      | pos  | 11.57  | 680.3577   |                 |            |            | 4    |          | 0.89632 | 0.96218                                 | -0.06 | -0.23 | 0.82   | -0.24 | 0.02                  | 0.36  | 0.73142  | 0.95787 | -0.15 | -0.19                    | -0.09 | -0.04 | 0.47  | -0.70   | -0.20                      |        |   |   |  |                       |  |  |  |  |        |  |  |  |  |
| HILICpos   | pos  | 0.42   | 680.3622   |                 |            |            | 4    |          | 0.28084 | 0.93204                                 | -0.09 | -0.31 | 0.68   | -0.07 | 0.03                  | 0.84  | 0.62385  | 0.93343 | -0.20 | -0.13                    | -0.11 | -0.21 | 0.02  | -0.38   | -0.35                      |        |   |   |  |                       |  |  |  |  |        |  |  |  |  |
| RPpos      | pos  | 11.03  | 680.3625   |                 |            |            | 4    |          | 0.66167 | 0.85808                                 | -0.14 | -0.39 | 0.82   | -0.08 | -0.15                 | 0.59  | 0.59150  | 0.92661 | -0.19 | -0.14                    | 0.01  | -0.15 | 0.12  | -0.60   | -0.34                      |        |   |   |  |                       |  |  |  |  |        |  |  |  |  |
| RPpos      | pos  | 10.94  | 680.3834   |                 |            |            | 4    |          | 0.90917 | 0.96631                                 | -0.07 | -0.33 | 1.09   | -0.04 | -0.21                 | 0.30  | 0.67221  | 0.94598 | -0.12 | -0.30                    | 0.17  | -0.15 | -0.02 | -0.44   | -0.22                      |        |   |   |  |                       |  |  |  |  |        |  |  |  |  |
| RPpos      | pos  | 11.36  | 680.3846   |                 |            |            | 4    |          | 0.29368 | 0.62546                                 | 0.08  | 0.09  | 0.38   | 0.37  | -0.25                 | 0.32  | 0.22481  | 0.74161 | 0.16  | 0.28                     | 0.34  | 0.22  | 0.02  | 0.33    | -0.48                      |        |   |   |  |                       |  |  |  |  |        |  |  |  |  |
| RPpos      | pos  | 5.89   | 680.4078   |                 |            |            | 4    |          | 0.35148 | 0.67155                                 | -0.25 | 0.52  | -0.10  | 0.04  | -0.12                 | -0.20 | 0.25740  | 0.77279 | -0.29 | -0.47                    | -0.16 | -0.62 | -0.27 | 0.41    | -0.30                      |        |   |   |  |                       |  |  |  |  |        |  |  |  |  |
| RPpos      | pos  | 7.28   | 680.4257   |                 |            |            | 4    |          | 0.44719 | 0.74239                                 | -0.25 | -0.23 | 1.03   | -0.23 | -0.31                 | 0.44  | 0.27247  | 0.78302 | -0.38 | -0.24                    | -0.07 | -0.30 | 0.20  | -0.47   | -0.46                      |        |   |   |  |                       |  |  |  |  |        |  |  |  |  |
| HILICpos   | pos  | 0.5    | 680.4265   |                 |            |            | 4    |          | 0.35190 | 0.67184                                 | -0.28 | -0.21 | 0.87   | -0.23 | -0.34                 | 0.23  | 0.28343  | 0.79201 | -0.37 | -0.25                    | -0.06 | -0.36 | 0.03  | -0.48   | -0.45                      |        |   |   |  |                       |  |  |  |  |        |  |  |  |  |
| RPpos      | pos  | 13.42  | 680.4791   |                 |            |            | 4    |          | 0.33113 | 0.65526                                 | -0.28 | -0.13 | -0.54  | 0.62  | 0.15                  | 0.38  | 0.57607  | 0.92304 | 0.12  | 0.15                     | 0.02  | 0.40  | -0.42 | 0.25    | 0.35                       |        |   |   |  |                       |  |  |  |  |        |  |  |  |  |
| HILICpos   | pos  | 0.71   | 680.9235   |                 |            |            | 4    |          | 0.45224 | 0.74541                                 | 0.11  | 0.27  | 0.28   | 0.05  | 0.18                  | 0.57  | 0.07792  | 0.52501 | -0.02 | -0.12                    | -0.05 | -0.21 | 0.07  | 0.34    | -0.20                      |        |   |   |  |                       |  |  |  |  |        |  |  |  |  |
| RPpos      | pos  | 12.44  | 681.0015   |                 |            |            | 4    |          | 0.53515 | 0.79621                                 | 0.13  | -0.03 | 0.97   | 0.00  | -0.01                 | 0.76  | 0.44988  | 0.88150 | -0.29 | 0.10                     | -0.47 | -0.58 | 0.09  | -0.70   | -0.13                      |        |   |   |  |                       |  |  |  |  |        |  |  |  |  |
| RPpos      | pos  | 11.57  | 681.0234   |                 |            |            | 4    |          | 0.71165 | 0.88233                                 | 0.07  | -0.26 | 0.71   | -0.15 | 0.42                  | 0.41  | 0.79160  | 0.96742 | -0.12 | -0.29                    | -0.03 | -0.10 | 0.29  | -0.43   | -0.10                      |        |   |   |  |                       |  |  |  |  |        |  |  |  |  |
| RPneg      | neg  | 10.509 | 681.2951   |                 |            |            | 4    |          | 0.71904 | 0.88548                                 | -0.12 | -0.01 | -0.54  | 0.64  | 1.12                  | 0.06  | 0.24679  | 0.76279 | -0.23 | -0.10                    | -0.62 | -0.36 | -0.08 | 0.32    | -0.26                      |        |   |   |  |                       |  |  |  |  |        |  |  |  |  |
| RPpos      | pos  | 8.4    | 681.2989   |                 |            |            | 4    |          | 0.36922 | 0.68563                                 | -0.10 | -0.20 | 0.88   | -0.11 | -0.35                 | 0.05  | 0.50446  | 0.90327 | -0.29 | 0.14                     | 0.36  | -0.28 | 0.46  | 0.29    | -0.14                      |        |   |   |  |                       |  |  |  |  |        |  |  |  |  |
| RPpos      | pos  | 12.44  | 681.6688   |                 |            |            | 4    |          | 0.43353 | 0.73239                                 |       |       |        |       |                       |       |          |         |       |                          |       |       |       |         |                            |        |   |   |  |                       |  |  |  |  |        |  |  |  |  |

|                        |      |            |                 |            |            |      |          |          |                            | IV-Alcohol self-administration (IV-ASA) |       |          |       |        |        |        |         |         |                            | IV-Alcohol clamp (IV-AC) |       |          |       |         |        |       |   |   |         |   |        |   |   |   |   |   |  |  |  |
|------------------------|------|------------|-----------------|------------|------------|------|----------|----------|----------------------------|-----------------------------------------|-------|----------|-------|--------|--------|--------|---------|---------|----------------------------|--------------------------|-------|----------|-------|---------|--------|-------|---|---|---------|---|--------|---|---|---|---|---|--|--|--|
|                        |      |            |                 |            |            |      |          |          |                            | IV-Ghrelin or Placebo                   |       |          |       |        | BrAC=0 |        |         |         |                            | IV-Ghrelin or Placebo    |       |          |       |         | BrAC=0 |       |   |   |         |   |        |   |   |   |   |   |  |  |  |
| Feature_ID             | Mode | Ionization | Average_Rt.min. | Average_Mz | Metabolite | MSMS | ID_Level | HMDB_ID  | Area Under the Curve (AUC) |                                         |       |          |       |        |        |        |         |         |                            |                          |       |          |       |         |        |       |   |   |         |   |        |   |   |   |   |   |  |  |  |
|                        |      |            |                 |            |            |      |          |          | Area Under the Curve (AUC) |                                         |       | Baseline |       | IV-ASA |        | BrAC=0 |         |         | Area Under the Curve (AUC) |                          |       | Baseline |       | Post-LD |        | IV-AC |   |   | Post-AC |   | BrAC=0 |   |   |   |   |   |  |  |  |
|                        |      |            |                 |            |            |      |          |          | p                          | q                                       | d     | d        | d     | d      | d      | d      | d       | d       | d                          | d                        | d     | d        | d     | d       | d      | d     | d | d | d       | d | d      | d | d | d | d | d |  |  |  |
| RPpos_685_7047_11.34   | RP   | pos        | 11.34           | 685.7047   |            |      | 4        | 685.7047 | 0.64513                    | 0.84984                                 | -0.13 | -0.45    | 0.49  | -0.25  | -0.10  | 1.00   | 0.60885 | 0.92983 | -0.16                      | -0.23                    | -0.01 | -0.17    | -0.19 | -0.43   | 0.07   |       |   |   |         |   |        |   |   |   |   |   |  |  |  |
| RPpos_685_8802_10.51   | RP   | pos        | 10.51           | 685.8802   |            |      | 4        | 685.8802 | 0.42012                    | 0.72320                                 | -0.20 | -0.19    | 0.97  | -0.13  | -0.33  | 0.12   | 0.46515 | 0.88764 | -0.21                      | -0.42                    | 0.14  | -0.06    | 0.07  | -0.66   | -0.26  |       |   |   |         |   |        |   |   |   |   |   |  |  |  |
| RPpos_686_0111_12.1    | RP   | pos        | 12.1            | 686.0110   |            |      | 4        | 686.0110 | 0.63324                    | 0.84443                                 | 0.06  | -0.02    | 0.70  | 0.05   | 0.00   | 0.51   | 0.51405 | 0.90648 | -0.22                      | -0.14                    | -0.19 | -0.13    | -0.09 | -0.57   | -0.22  |       |   |   |         |   |        |   |   |   |   |   |  |  |  |
| RPneg_686_24591_10.06  | RP   | neg        | 10.06           | 686.2459   |            |      | 4        | 686.2459 | 0.24063                    | 0.58166                                 | -0.19 | 0.04     | 0.08  | -0.09  | -0.10  | -0.21  | 0.87541 | 0.98217 | 0.05                       | 0.06                     | -0.03 | 0.02     | 0.28  | 0.10    | 0.14   |       |   |   |         |   |        |   |   |   |   |   |  |  |  |
| RPneg_686_29442_8.823  | RP   | neg        | 8.823           | 686.2944   |            |      | 4        | 686.2944 | 0.05351                    | 0.33065                                 | -0.35 | -0.18    | -0.20 | -0.33  | -0.24  | -0.64  | 0.02586 | 0.33862 | -0.16                      | -0.25                    | -0.11 | -0.54    | 0.05  | 0.07    | -0.20  |       |   |   |         |   |        |   |   |   |   |   |  |  |  |
| RPpos_686_3435_11.1    | RP   | pos        | 11.1            | 686.3435   |            |      | 4        | 686.3435 | 0.54432                    | 0.80053                                 | -0.11 | -0.11    | 0.94  | -0.12  | 0.35   | 0.39   | 0.55691 | 0.81883 | -0.21                      | -0.35                    | 0.11  | -0.02    | -0.03 | -0.45   | -0.15  |       |   |   |         |   |        |   |   |   |   |   |  |  |  |
| RPpos_686_6765_12.1    | RP   | pos        | 12.1            | 686.6765   |            |      | 4        | 686.6765 | 0.52707                    | 0.79176                                 | 0.14  | -0.18    | 0.62  | 0.06   | 0.37   | 0.38   | 0.35375 | 0.83300 | -0.28                      | -0.29                    | -0.24 | -0.27    | 0.30  | -0.62   | -0.26  |       |   |   |         |   |        |   |   |   |   |   |  |  |  |
| RPpos_686_8431_11.25   | RP   | pos        | 11.25           | 686.8431   |            |      | 4        | 686.8431 | 0.88159                    | 0.95613                                 | 0.02  | -0.02    | 0.43  | 0.00   | 0.28   | -0.05  | 0.91362 | 0.98749 | 0.00                       | -0.42                    | 0.38  | 0.20     | 0.42  | -0.57   | -0.41  |       |   |   |         |   |        |   |   |   |   |   |  |  |  |
| RPneg_687_10522_9.305  | RP   | neg        | 9.305           | 687.1052   |            |      | 4        | 687.1052 | 0.38081                    | 0.69511                                 | -0.24 | 0.92     | 0.14  | 0.09   | -0.36  | 0.70   | 0.51388 | 0.90648 | -0.16                      | -0.23                    | -0.47 | -0.20    | 0.31  | -0.25   | -1.39  |       |   |   |         |   |        |   |   |   |   |   |  |  |  |
| RPneg_687_27948_10.392 | RP   | neg        | 10.392          | 687.2795   |            |      | 4        | 687.2795 | 0.01013                    | 0.19617                                 | -0.31 | -0.08    | -0.28 | -0.19  | 0.11   | -0.32  | 0.98907 | 0.99810 | 0.16                       | 0.10                     | 0.22  | 0.01     | 0.45  | 0.23    | -0.23  |       |   |   |         |   |        |   |   |   |   |   |  |  |  |
| HLICpos_687_3766_0.43  | HLIC | pos        | 0.43            | 687.3766   |            |      | 4        | 687.3766 | 0.36971                    | 0.68607                                 | -0.24 | -0.54    | 0.76  | -0.29  | -0.33  | 0.47   | 0.49826 | 0.90072 | -0.21                      | -0.19                    | 0.03  | -0.09    | 0.07  | -0.53   | -0.53  |       |   |   |         |   |        |   |   |   |   |   |  |  |  |
| RPpos_687_3771_10.79   | RP   | pos        | 10.79           | 687.3771   |            |      | 4        | 687.3771 | 0.81041                    | 0.92734                                 | -0.09 | -0.17    | 1.06  | 0.01   | -0.21  | 0.51   | 0.66220 | 0.94273 | -0.15                      | -0.23                    | -0.01 | -0.11    | 0.15  | -0.44   | -0.27  |       |   |   |         |   |        |   |   |   |   |   |  |  |  |
| HLICpos_687_4338_0.75  | HLIC | pos        | 0.75            | 687.4338   |            |      | 4        | 687.4338 | 0.00047                    | 0.04061                                 | -0.86 | -0.12    | 0.17  | -0.95  | -1.01  | 0.23   | 0.24203 | 0.75854 | -0.37                      | -0.44                    | 0.15  | -0.42    | -0.48 | 0.10    | -0.61  |       |   |   |         |   |        |   |   |   |   |   |  |  |  |
| RPneg_687_54205_12.75  | RP   | neg        | 12.75           | 687.5421   |            |      | 4        | 687.5421 | 0.02937                    | 0.29093                                 | -0.59 | 0.60     | -0.16 | -0.80  | -0.11  | -0.39  | 0.30186 | 0.80313 | -0.16                      | 0.25                     | -0.38 | -0.23    | -0.20 | -0.36   | -0.50  |       |   |   |         |   |        |   |   |   |   |   |  |  |  |
| RPpos_687_5428_12.04   | RP   | pos        | 12.04           | 687.5428   |            |      | 4        | 687.5428 | 0.00689                    | 0.16370                                 | -0.52 | 0.05     | -0.54 | -0.74  | -0.04  | -0.18  | 0.28479 | 0.79289 | -0.21                      | -0.04                    | 0.19  | -0.33    | -0.06 | -0.53   | -0.49  |       |   |   |         |   |        |   |   |   |   |   |  |  |  |
| RPpos_688_1471_10.94   | RP   | pos        | 10.94           | 688.1471   |            |      | 4        | 688.1471 | 0.62655                    | 0.84170                                 | 0.24  | -0.16    | 0.50  | 0.43   | 0.18   | 0.11   | 0.53375 | 0.91313 | -0.29                      | 0.02                     | 0.07  | -0.48    | -0.51 | -0.34   | 0.16   |       |   |   |         |   |        |   |   |   |   |   |  |  |  |
| HLICpos_688_1702_4.07  | HLIC | pos        | 4.07            | 688.1702   |            |      | 4        | 688.1702 | 0.15434                    | 0.49697                                 | -0.17 | 0.23     | 0.67  | -0.08  | -0.69  | -0.59  | 0.60555 | 0.92920 | 0.15                       | -0.02                    | 0.63  | 0.21     | 0.18  | -0.12   | -0.45  |       |   |   |         |   |        |   |   |   |   |   |  |  |  |
| RPneg_688_29254_10.634 | RP   | neg        | 10.634          | 688.2925   |            |      | 4        | 688.2925 | 0.00756                    | 0.17063                                 | -0.26 | -0.02    | -0.19 | -0.09  | 0.06   | -0.42  | 0.81799 | 0.97238 | 0.18                       | 0.10                     | 0.28  | 0.19     | 0.15  | 0.26    | 0.01   |       |   |   |         |   |        |   |   |   |   |   |  |  |  |
| RPpos_688_3144_5.58    | RP   | pos        | 5.58            | 688.3144   |            |      | 4        | 688.3144 | 0.14653                    | 0.48795                                 | 0.16  | 0.03     | 0.28  | 0.14   | 0.24   | 0.52   | 0.89262 | 0.98433 | -0.05                      | -0.13                    | 0.11  | -0.02    | 0.18  | -0.18   | -0.22  |       |   |   |         |   |        |   |   |   |   |   |  |  |  |
| HLICpos_688_3149_0.84  | HLIC | pos        | 0.84            | 688.3149   |            |      | 4        | 688.3149 | 0.52843                    | 0.79251                                 | 0.19  | 0.42     | 0.93  | 0.63   | 0.05   | -0.19  | 0.07426 | 0.51692 | 0.90                       | 0.55                     | 0.55  | 0.63     | 1.88  | 0.02    | -0.46  |       |   |   |         |   |        |   |   |   |   |   |  |  |  |
| RPpos_688_3389_11.49   | RP   | pos        | 11.49           | 688.3389   |            |      | 4        | 688.3389 | 0.59918                    | 0.82804                                 | 0.10  | -0.14    | 0.87  | 0.06   | 0.15   | 0.07   | 0.40857 | 0.86241 | -0.30                      | -0.09                    | -0.30 | -0.23    | 0.06  | -0.57   | -0.30  |       |   |   |         |   |        |   |   |   |   |   |  |  |  |
| HLICpos_688_392_0.57   | HLIC | pos        | 0.57            | 688.3920   |            |      | 4        | 688.3920 | 0.65601                    | 0.81162                                 | 0.14  | -0.24    | 0.52  | 0.06   | 0.40   | -0.02  | 0.48428 | 0.89681 | 0.12                       | 0.04                     | -0.04 | -0.01    | 0.30  | 0.18    | 0.07   |       |   |   |         |   |        |   |   |   |   |   |  |  |  |
| RPpos_688_396_8.48     | RP   | pos        | 8.48            | 688.3960   |            |      | 4        | 688.3960 | 0.30567                    | 0.63452                                 | 0.22  | -0.14    | 0.62  | 0.24   | 0.28   | 0.09   | 0.60093 | 0.92810 | 0.13                       | -0.06                    | 0.30  | 0.07     | 0.21  | -0.15   | 0.16   |       |   |   |         |   |        |   |   |   |   |   |  |  |  |
| RPpos_688_4105_6.64    | RP   | pos        | 6.64            | 688.4105   |            |      | 4        | 688.4105 | 0.92460                    | 0.97276                                 | 0.03  | 0.10     | 0.22  | 0.04   | 0.06   | 0.25   | 0.63659 | 0.93602 | 0.22                       | 0.10                     | 0.06  | 0.00     | 1.07  | -0.56   | 0.10   |       |   |   |         |   |        |   |   |   |   |   |  |  |  |
| RPpos_688_5205_10.47   | RP   | pos        | 10.47           | 688.5205   |            |      | 4        | 688.5205 | 0.71684                    | 0.88469                                 | -0.20 | 0.20     | 0.01  | 0.07   | 0.17   | -0.25  | 0.64957 | 0.93921 | -0.17                      | -0.43                    | 0.04  | 0.24     | -0.09 | -0.72   | -0.10  |       |   |   |         |   |        |   |   |   |   |   |  |  |  |
| RPpos_689_4117_7.36    | RP   | pos        | 7.36            | 689.4117   |            |      | 4        | 689.4117 | 0.45837                    | 0.74992                                 | -0.24 | -0.20    | 1.02  | -0.20  | -0.26  | 0.42   | 0.23448 | 0.75207 | -0.37                      | -0.25                    | -0.02 | -0.31    | -0.19 | -0.44   | -0.49  |       |   |   |         |   |        |   |   |   |   |   |  |  |  |
| RPneg_689_48975_11.445 | RP   | neg        | 11.445          | 689.4898   |            |      | 4        | 689.4898 | 0.60470                    | 0.83165                                 | -0.13 | 0.12     | 0.04  | -0.25  | 0.00   | -0.11  | 0.03900 | 0.40252 | -0.52                      | -0.58                    | -0.45 | -0.52    | -0.40 | -0.52   | -0.63  |       |   |   |         |   |        |   |   |   |   |   |  |  |  |
| HLICpos_689_5583_0.92  | HLIC | pos        | 0.92            | 689.5583   |            |      | 4        | 689.5583 | 0.08294                    | 0.40798                                 | -0.41 | 0.38     | -0.54 | -0.76  | 0.27   | -0.07  | 0.09126 | 0.55651 | -0.24                      | -0.05                    | -0.08 | -0.24    | -0.24 | -0.22   | -0.38  |       |   |   |         |   |        |   |   |   |   |   |  |  |  |
| HLICpos_689_5585_0.87  | HLIC | pos        | 0.87            | 689.5585   |            |      | 4        | 689.5585 | 0.59283                    | 0.82533                                 | -0.14 | 0.55     | -0.16 | -0.42  | 0.36   | -0.08  | 0.15939 | 0.66816 | -0.22                      | -0.07                    | 0.03  | -0.33    | -0.15 | -0.17   | -0.39  |       |   |   |         |   |        |   |   |   |   |   |  |  |  |
| HLICpos_689_7141_0.46  | HLIC | pos        | 0.46            | 689.7141   |            |      | 4        | 689.7141 | 0.15762                    | 0.50078                                 | 0.21  | -0.16    | 1.09  | 0.19   | 0.07   | 0.75   | 0.99098 | 0.99855 | -0.05                      | 0.07                     | -0.09 | 0.17     | 0.28  | -0.50   | -0.48  |       |   |   |         |   |        |   |   |   |   |   |  |  |  |
| RPpos_689_7162_11.14   | RP   | pos        | 11.14           | 689.7162   |            |      | 4        | 689.7162 | 0.75064                    | 0.90069                                 | 0.05  | -0.29    | 0.72  | 0.01   | 0.13   | 0.71   | 0.60300 | 0.92874 | -0.16                      | -0.21                    | 0.05  | -0.21    | -0.04 | -0.41   | -0.20  |       |   |   |         |   |        |   |   |   |   |   |  |  |  |
| RPpos_689_854_10.79    | RP   | pos        | 10.79           | 689.8540   |            |      | 4        | 689.8540 | 0.75899                    | 0.90482                                 | -0.09 | -0.36    | 0.69  | -0.11  | 0.16   | 0.15   | 0.54244 | 0.91492 | -0.20                      | -0.29                    | 0.18  | -0.41    | 0.46  | -0.58   | -0.26  |       |   |   |         |   |        |   |   |   |   |   |  |  |  |
| HLICpos_690_0452_0.46  | HLIC | pos        | 0.46            | 690.0452   |            |      | 4        | 690.0452 | 0.90422                    | 0.96465                                 | -0.06 | 0.29     | 0.44  | -0.15  | 0.07   | 0.86   | 0.88800 | 0.98372 | -0.04                      | -0.29                    | 0.41  | -0.12    | 0.10  | -0.17   | -0.68  |       |   |   |         |   |        |   |   |   |   |   |  |  |  |
| RPpos_690_047_11.14    | RP   | pos        | 11.14           | 690.0470   |            |      | 4        | 690.0470 | 0.72914                    | 0.88963                                 | 0.06  | -0.23    | 0.84  | -0.25  | -0.04  | 0.61   | 0.62159 | 0.93338 | -0.16                      | -0.15                    | -0.12 | 0.10     | 0.05  | -0.49   | -0.25  |       |   |   |         |   |        |   |   |   |   |   |  |  |  |

|                        |       |            |                 |            |            |      |          |         |                            | IV-Alcohol self-administration (IV-ASA) |       |        |       |       |                       |       |         |         |                       | IV-Alcohol clamp (IV-AC) |       |         |       |       |                       |   |   |   |   |
|------------------------|-------|------------|-----------------|------------|------------|------|----------|---------|----------------------------|-----------------------------------------|-------|--------|-------|-------|-----------------------|-------|---------|---------|-----------------------|--------------------------|-------|---------|-------|-------|-----------------------|---|---|---|---|
| Feature_ID             | Mode  | Ionization | Average_Rt.min. | Average_Mz | Metabolite | MSMS | ID_Level | HMDB_ID | Area Under the Curve (AUC) |                                         |       |        |       |       |                       |       |         |         | IV-Ghrelin or Placebo |                          |       |         |       |       |                       |   |   |   |   |
|                        |       |            |                 |            |            |      |          |         | Baseline                   |                                         |       | IV-ASA |       |       | IV-Ghrelin or Placebo |       |         |         | Baseline              |                          |       | Post-LD |       |       | IV-Ghrelin or Placebo |   |   |   |   |
|                        |       |            |                 |            |            |      |          |         | p                          | q                                       | d     | d      | d     | d     | d                     | d     | d       | d       | d                     | d                        | p     | q       | d     | d     | d                     | d | d | d | d |
| RPpos_696.6761_12.41   | RP    | pos        | 12.41           | 696.6761   |            |      | 4        |         | 0.42503                    | 0.72647                                 | 0.13  | 0.10   | 0.70  | 0.15  | 0.09                  | 0.46  | 0.41989 | 0.86793 | -0.29                 | -0.05                    | -0.17 | -0.29   | 0.16  | -1.00 | -0.44                 |   |   |   |   |
| RPneg_696.77203_5.994  | RP    | neg        | 5.994           | 696.7720   |            |      | 4        |         | 0.14555                    | 0.48366                                 | -0.18 | 0.04   | -0.05 | -0.31 | -0.17                 | -0.05 | 0.12581 | 0.61744 | -0.37                 | -0.07                    | -0.35 | 0.06    | -0.34 | -0.64 | -0.31                 |   |   |   |   |
| HILICneg_696.773_6.38  | HILIC | neg        | 6.38            | 696.7730   |            |      | 4        |         | 0.15733                    | 0.50064                                 | -0.20 | 0.08   | -0.05 | -0.32 | -0.17                 | -0.10 | 0.10296 | 0.57751 | -0.38                 | -0.09                    | -0.34 | 0.05    | -0.32 | -0.68 | -0.33                 |   |   |   |   |
| RPpos_696.8771_10.51   | RP    | pos        | 10.51           | 696.8771   |            |      | 4        |         | 0.36595                    | 0.68307                                 | -0.21 | 0.18   | 0.42  | -0.21 | -0.38                 | 0.65  | 0.41735 | 0.86646 | -0.25                 | -0.17                    | -0.17 | -0.10   | -0.09 | -0.37 | -0.47                 |   |   |   |   |
| RPpos_697.0177_5.46    | RP    | pos        | 5.46            | 697.0177   |            |      | 4        |         | 0.37853                    | 0.69334                                 | -0.20 | -0.08  | 0.78  | 0.08  | 0.17                  | 0.50  | 0.34656 | 0.77665 | -0.31                 | -0.11                    | -0.11 | -0.31   | 0.14  | -0.74 | -0.33                 |   |   |   |   |
| HILICpos_697.3376_1.88 | HILIC | pos        | 1.88            | 697.3376   |            |      | 4        |         | 0.14987                    | 0.49323                                 | 0.35  | 0.27   | 0.35  | 0.07  | 0.43                  | 0.74  | 0.31453 | 0.81301 | -0.18                 | 0.16                     | -0.03 | -0.12   | 0.18  | -0.21 | -0.31                 |   |   |   |   |
| RPpos_697.3399_1.88    | RP    | pos        | 1.88            | 697.3399   |            |      | 4        |         | 0.70400                    | 0.87908                                 | 0.05  | 0.13   | 0.57  | 0.10  | 0.54                  | 0.21  | 0.51459 | 0.90649 | -0.10                 | 0.37                     | 0.06  | -0.36   | 0.51  | -0.26 | -0.46                 |   |   |   |   |
| RPpos_697.351_11.56    | RP    | pos        | 11.56           | 697.3510   |            |      | 4        |         | 0.67976                    | 0.86704                                 | 0.10  | -0.29  | 0.81  | -0.08 | 0.14                  | 0.49  | 0.66385 | 0.94310 | -0.17                 | -0.03                    | -0.35 | -0.09   | 0.28  | -0.31 | -0.13                 |   |   |   |   |
| HILICpos_697.3738_4.73 | HILIC | pos        | 4.73            | 697.3738   |            |      | 4        |         | 0.48512                    | 0.76764                                 | 0.18  | 0.55   | 0.63  | 0.11  | 0.16                  | -0.56 | 0.37110 | 0.84109 | 0.21                  | 0.54                     | 0.92  | 0.59    | 0.00  | -0.27 | -0.60                 |   |   |   |   |
| RPpos_697.3982_6.78    | RP    | pos        | 6.78            | 697.3982   |            |      | 4        |         | 0.72305                    | 0.88677                                 | 0.09  | 0.20   | 0.33  | 0.53  | -0.01                 | 1.01  | 0.74464 | 0.96070 | -0.20                 | -0.16                    | 0.66  | -0.07   | -0.71 | -0.90 | -0.25                 |   |   |   |   |
| RPpos_697.3993_7.17    | RP    | pos        | 7.17            | 697.3993   |            |      | 4        |         | 0.44133                    | 0.73821                                 | -0.21 | -0.37  | 0.63  | -0.17 | -0.41                 | 0.16  | 0.84151 | 0.97647 | 0.02                  | 0.21                     | 0.14  | 0.39    | -0.10 | -0.83 | -0.12                 |   |   |   |   |
| RPpos_697.5247_12.15   | RP    | pos        | 12.15           | 697.5247   |            |      | 4        |         | 0.15341                    | 0.49636                                 | -0.31 | 0.51   | -0.25 | -0.64 | 0.11                  | -0.22 | 0.05930 | 0.47832 | -0.37                 | -0.39                    | -0.18 | -0.46   | -0.29 | -0.36 | -0.44                 |   |   |   |   |
| RPpos_697.6597_11.58   | RP    | pos        | 11.58           | 697.6597   |            |      | 4        |         | 0.84702                    | 0.94286                                 | 0.07  | 0.32   | 0.12  | 0.18  | 0.13                  | -0.70 | 0.61350 | 0.93129 | -0.03                 | 0.56                     | 0.00  | 0.08    | -0.46 | 0.06  | -0.05                 |   |   |   |   |
| RPpos_697.8165_10.83   | RP    | pos        | 10.83           | 697.8165   |            |      | 4        |         | 0.80905                    | 0.92685                                 | 0.13  | 0.20   | 0.39  | 0.33  | 0.00                  | 0.32  | 0.33178 | 0.82167 | -0.32                 | -0.01                    | 0.08  | -0.41   | 0.16  | -0.76 | 0.74                  |   |   |   |   |
| RPpos_698.256_13.64    | RP    | pos        | 13.64           | 698.2560   |            |      | 4        |         | 0.53142                    | 0.79413                                 | -0.22 | -0.52  | 0.18  | 0.65  | -0.30                 | 0.29  | 0.97328 | 0.99690 | -0.01                 | -0.35                    | -0.45 | 0.26    | -0.04 | 0.12  | 0.54                  |   |   |   |   |
| RPneg_698.27441_10.23  | RP    | neg        | 10.23           | 698.2744   |            |      | 4        |         | 0.01727                    | 0.24161                                 | -0.47 | -0.24  | -0.26 | -0.55 | -0.04                 | -0.39 | 0.42296 | 0.86986 | 0.07                  | 0.25                     | 0.14  | 0.06    | 0.24  | 0.10  | -0.36                 |   |   |   |   |
| RPneg_698.31812_10.781 | RP    | neg        | 10.781          | 698.3181   |            |      | 4        |         | 0.00619                    | 0.15406                                 | -0.51 | 0.00   | -0.10 | -0.46 | -0.58                 | -0.40 | 0.35426 | 0.83323 | -0.03                 | -0.09                    | -0.10 | -0.03   | 0.07  | 0.03  | -0.02                 |   |   |   |   |
| HILICpos_698.3239_0.85 | HILIC | pos        | 0.85            | 698.3239   |            |      | 4        |         | 0.36566                    | 0.68294                                 | -0.13 | 0.02   | 0.28  | 0.00  | -0.07                 | 0.01  | 0.59712 | 0.92780 | 0.00                  | 0.26                     | 0.35  | -0.14   | 1.75  | -0.32 | -0.77                 |   |   |   |   |
| RPneg_698.51111_13.418 | RP    | neg        | 13.418          | 698.5111   |            |      | 4        |         | 0.51984                    | 0.82848                                 | -0.20 | 0.10   | -0.30 | -0.13 | 0.04                  | -0.42 | 0.79761 | 0.96900 | -0.12                 | 0.64                     | -0.01 | 0.28    | 0.37  | -0.66 | -0.66                 |   |   |   |   |
| HILICneg_698.5121_0.67 | HILIC | neg        | 0.67            | 698.5121   |            |      | 4        |         | 0.48564                    | 0.76790                                 | -0.25 | 0.28   | -0.15 | -0.32 | 0.00                  | -0.44 | 0.39129 | 0.85200 | 0.33                  | 0.40                     | 0.24  | 0.40    | 0.42  | 0.18  | -0.36                 |   |   |   |   |
| RPpos_698.7866_6       | RP    | pos        | 6               | 698.7866   |            |      | 4        |         | 0.07433                    | 0.39254                                 | -0.24 | 0.09   | -0.12 | -0.39 | -0.20                 | 0.08  | 0.24347 | 0.75926 | -0.31                 | 0.16                     | 0.12  | -0.23   | -0.49 | -0.29 | -0.21                 |   |   |   |   |
| RPpos_699.0691_10.71   | RP    | pos        | 10.71           | 699.0691   |            |      | 4        |         | 0.67433                    | 0.86419                                 | 0.13  | 0.14   | 0.92  | 0.17  | 0.17                  | 0.03  | 0.24617 | 0.76221 | -0.24                 | -0.48                    | -0.01 | -0.28   | -0.01 | -0.37 | -0.33                 |   |   |   |   |
| RPneg_699.46387_11.191 | RP    | neg        | 11.191          | 699.4639   |            |      | 4        |         | 0.00213                    | 0.09384                                 | 1.39  | 0.08   | 0.46  | 1.61  | 2.58                  | 0.16  | 0.98808 | 0.99810 | 0.00                  | -0.19                    | 0.37  | -0.27   | 0.16  | -0.02 | -0.03                 |   |   |   |   |
| RPpos_699.7131_11.34   | RP    | pos        | 11.34           | 699.7131   |            |      | 4        |         | 0.82262                    | 0.93278                                 | 0.03  | -0.23  | 0.60  | -0.01 | 0.22                  | 0.15  | 0.86860 | 0.98025 | 0.01                  | 0.04                     | -0.02 | -0.04   | 0.36  | -0.42 | 0.06                  |   |   |   |   |
| RPpos_699.7386_10.71   | RP    | pos        | 10.71           | 699.7386   |            |      | 4        |         | 0.96661                    | 0.98800                                 | -0.01 | -0.22  | 0.91  | -0.20 | -0.11                 | 0.90  | 0.45845 | 0.88479 | -0.21                 | -0.38                    | -0.20 | -0.31   | 0.45  | -0.46 | -0.05                 |   |   |   |   |
| RPpos_700.0461_11.34   | RP    | pos        | 11.34           | 700.0461   |            |      | 4        |         | 0.86088                    | 0.94794                                 | 0.01  | -0.19  | 0.73  | -0.17 | 0.19                  | 0.56  | 0.79448 | 0.96799 | -0.12                 | -0.40                    | 0.13  | -0.16   | 0.24  | -0.46 | -0.07                 |   |   |   |   |
| RPneg_700.29053_10.393 | RP    | neg        | 10.393          | 700.2905   |            |      | 4        |         | 0.02159                    | 0.26369                                 | -0.31 | -0.04  | -0.17 | -0.18 | -0.05                 | -0.13 | 0.75616 | 0.96233 | 0.20                  | 0.38                     | 0.22  | 0.02    | 0.46  | 0.21  | -0.12                 |   |   |   |   |
| HILICpos_700.3191_0.81 | HILIC | pos        | 0.81            | 700.3191   |            |      | 4        |         | 0.75784                    | 0.90455                                 | 0.10  | 0.31   | 0.82  | 0.20  | 0.20                  | -0.66 | 0.03762 | 0.39530 | 0.83                  | 0.95                     | 0.90  | 1.66    | 0.78  | -0.06 | -0.17                 |   |   |   |   |
| RPpos_700.3531_12.08   | RP    | pos        | 12.08           | 700.3531   |            |      | 4        |         | 0.92412                    | 0.97276                                 | 0.01  | -0.16  | 0.54  | -0.10 | 0.14                  | 0.41  | 0.63353 | 0.93546 | -0.19                 | -0.22                    | -0.19 | -0.15   | 0.14  | -0.35 | -0.28                 |   |   |   |   |
| RPpos_700.3802_11.34   | RP    | pos        | 11.34           | 700.3802   |            |      | 4        |         | 0.84463                    | 0.94193                                 | -0.07 | -0.24  | 0.48  | -0.12 | 0.10                  | 0.49  | 0.84278 | 0.97663 | 0.04                  | -0.10                    | 0.09  | -0.05   | 0.20  | -0.36 | 0.28                  |   |   |   |   |
| RPpos_700.5257_13.35   | RP    | pos        | 13.35           | 700.5257   |            |      | 4        |         | 0.64091                    | 0.84801                                 | -0.21 | 0.41   | -0.12 | -0.29 | 0.06                  | -0.37 | 0.48840 | 0.89812 | 0.25                  | 0.30                     | 0.18  | 0.38    | 0.33  | 0.02  | -0.19                 |   |   |   |   |
| HILICpos_700.5266_0.65 | HILIC | pos        | 0.65            | 700.5266   |            |      | 4        |         | 0.39231                    | 0.70267                                 | -0.26 | 0.15   | -0.13 | -0.41 | 0.23                  | -0.41 | 0.36477 | 0.83786 | 0.27                  | 0.64                     | 0.25  | 0.28    | 0.78  | -0.02 | -0.54                 |   |   |   |   |
| RPpos_700.5874_12.08   | RP    | pos        | 12.08           | 700.5874   |            |      | 4        |         | 0.53970                    | 0.79830                                 | 0.12  | 0.01   | 0.87  | 0.02  | 0.05                  | 0.44  | 0.80208 | 0.95982 | -0.13                 | -0.09                    | -0.08 | -0.02   | 0.20  | -0.64 | -0.15                 |   |   |   |   |
| RPneg_701.022_12.08    | RP    | neg        | 12.08           | 701.0220   |            |      | 4        |         | 0.61986                    | 0.83867                                 | 0.08  | -0.24  | 1.01  | -0.18 | 0.24                  | 0.33  | 0.55863 | 0.91988 | -0.22                 | -0.12                    | -0.25 | 0.10    | -0.10 | -0.61 | -0.20                 |   |   |   |   |
| RPneg_701.15234_9.154  | RP    | neg        | 9.154           | 701.1523   |            |      | 4        |         | 0.52193                    | 0.78879                                 | -0.23 | 0.12   | 0.56  | 0.75  | 0.50                  | 0.16  | 0.31551 | 0.81238 | 0.07                  | 0.00                     | 0.25  | 0.46    | 0.38  | -0.01 | -0.30                 |   |   |   |   |
| RPneg_701.15283_9.835  | RP    | neg        | 9.835           | 701.1528   |            |      | 4        |         | 0.92353                    | 0.97251                                 | 0.03  | 0.78   | 0.59  | 0.04  | -0.02                 | -0.09 | 0.00358 | 0.12219 | 1.18                  | 0.59                     | 0.31  | 0.14    | 0.35  | 0.73  | 1.12                  |   |   |   |   |
| RPneg_701.15546_9.372  | RP    | neg        | 9.372           | 701.1555   |            |      | 4        |         | 0.12393                    | 0.45916                                 | -0.50 | 0.27   | -0.22 | -0.23 | 0.58                  | -0.59 | 0.98052 | 0.99752 | -0.03                 | 0.09                     | 0.46  | -0.17   | 0.09  | -0.11 | -0.81                 |   |   |   |   |
| RPneg_701.15546_9.705  | RP    | neg        | 9.705           | 701.1555   |            |      | 4        |         | 0.24149                    | 0.58195                                 | -0.41 | 0.26   | 0.46  | 0.10  | 0.38                  | -0.12 | 0.91057 | 0.98698 | -0.07                 | 0.27                     | 0.30  | 0.14    | -0.10 | -0.45 | -0.83                 |   |   |   |   |
| HILICpos_701.3483_1.36 | HILIC | pos        | 1.36            | 701.3483   |            |      | 4        |         | 0.01178                    | 0.20809                                 | -0.17 | -0.11  | 0.50  | -0.02 | -0.27                 | -0.65 | 0.49028 | 0.89836 | 0.14                  | 0.21                     | 0.19  | 0.13    | 0.47  | -0.03 | -0.34                 |   |   |   |   |
| RPpos_701.3522_12.08   | RP    | pos        | 12.08           | 701.3522   |            |      | 4        |         | 0.39741                    | 0.70699                                 | 0.15  | 0.12   | 0.94  | -0.13 | 0.25                  | 0.62  | 0.46702 | 0.88844 | -0.23                 | -0.16                    | -0.08 | -0.28   | 0.09  | -0.71 | -0.29                 |   |   |   |   |
| RPpos_701.3912_5.7     | RP    | pos        | 5.7             | 701.3912   |            |      | 4        |         | 0.46571                    | 0.75454                                 | -0.19 | 0.20   | 0.49  | -0.22 | -0.29                 | 0.81  | 0.05638 | 0.46882 | -0.43                 | -0.33                    | -0.46 | -0.55   | -0.04 | 0.00  | -0.62                 |   |   |   |   |
| HILICpos_701.4083_5.8  | HILIC | pos        | 5.8             | 701.4083   |            |      | 4        |         | 0.79127                    | 0.91858                                 | 0.15  | 0.64   | 0.46  | 0.69  | 0.17                  | -0.72 | 0.03171 | 0.36926 | 1.33                  | 1.26                     | 0.45  | 0.78    | 1.04  | 1.21  | 0.92                  |   |   |   |   |
| RPpos_701.4109_10.17   | RP    | pos        | 10.17           | 701.4109   |            |      | 4        |         | 0.32048                    | 0.64701                                 | 0.16  | 0.35   | 0.50  | 0.21  | 0.18                  | 0.65  | 0.19850 | 0.71424 | -0.15                 | -0.18                    | -0.09 | -0.24   | 0.00  | -0.18 | -0.23                 |   |   |   |   |
| RPneg_701.42816_10.499 | RP    | neg        | 10.499          | 701.4282   |            |      | 4        |         | 0.89034                    | 0.95991                                 | -0.06 | 0.71   | -0.26 | 0.24  | 0.10                  | -0.68 | 0.14452 | 0.64777 | -0.23                 | 0.95                     | -0.46 | -0.18   | -0.84 | -0.04 | -0.04                 |   |   |   |   |
| RPpos_701.4911_10.67   | RP    | pos        | 10.67           | 701.4911   |            |      | 4        |         | 0.79079                    | 0.91828                                 | 0.10  | 0.12   | 0.17  | 0.74  | 0.18                  | 0.10  | 0.53118 | 0.91243 | -0.36                 | 0.09                     | -0.02 | 0.84    | -0.01 | -0.64 | 0.98                  |   |   |   |   |
| HILICpos_701.5576_0.92 | HILIC | pos        | 0.92            | 701.5576   |            |      | 4        |         | 0.33552                    | 0.65844                                 | -0.27 | 0.40   | -0.43 | -0.48 | 1.07                  | -0.22 | 0.81230 | 0.97170 | -0.09                 | -0.10                    | 0.23  | -0.10   | 0.03  | -0.18 | -0.41                 |   |   |   |   |
| HILICpos_701.5599_0.86 | HILIC | pos        | 0.86            | 701.5599   |            |      | 4        |         | 0.62086                    | 0.83900                                 | -0.12 | 0.80   | 0.28  | 0.40  | 0.45                  | -0.33 | 0.63205 | 0.93546 | 0.02                  | 0.11                     | 0.25  | 0.00    | 0.13  | 0.05  | -0.37                 |   |   |   |   |
| HILICpos_702.165_4.07  | HILIC | pos        | 4.07            | 702.1650   |            |      | 4        |         | 0.21024                    | 0.55330                                 | -0.21 | -0.09  | 0.80  | -0.17 | -0.55                 | -0.43 | 0.79751 | 0.99741 | -0.03                 | -0.02                    | -0.10 | 0.35    | 0.18  | -0.01 | -0.57                 |   |   |   |   |
| RPpos_702.375_0.42     |       |            |                 |            |            |      |          |         |                            |                                         |       |        |       |       |                       |       |         |         |                       |                          |       |         |       |       |                       |   |   |   |   |

|                        |       |            |                 |            |            |      |          |         |                            | IV-Alcohol self-administration (IV-ASA) |       |       |       |                       |       |       |         |         |          | IV-Alcohol clamp (IV-AC) |       |       |       |                            |       |   |   |   |                       |   |   |   |   |        |   |   |   |   |
|------------------------|-------|------------|-----------------|------------|------------|------|----------|---------|----------------------------|-----------------------------------------|-------|-------|-------|-----------------------|-------|-------|---------|---------|----------|--------------------------|-------|-------|-------|----------------------------|-------|---|---|---|-----------------------|---|---|---|---|--------|---|---|---|---|
| Feature_ID             | Mode  | Ionization | Average_Rt.min. | Average_Mz | Metabolite | MSMS | ID_Level | HMDB_ID | Area Under the Curve (AUC) |                                         |       |       |       |                       |       |       |         |         | Baseline |                          |       |       |       |                            |       |   |   |   | Post-LD               |   |   |   |   |        |   |   |   |   |
|                        |       |            |                 |            |            |      |          |         | Area Under the Curve (AUC) |                                         |       |       |       | IV-Ghrelin or Placebo |       |       |         |         | BrAC=0   |                          |       |       |       | Area Under the Curve (AUC) |       |   |   |   | IV-Ghrelin or Placebo |   |   |   |   | BrAC=0 |   |   |   |   |
|                        |       |            |                 |            |            |      |          |         | p                          | q                                       | d     | d     | d     | d                     | d     | d     | d       | d       | d        | d                        | d     | d     | d     | p                          | q     | d | d | d | d                     | d | d | d | d | d      | d | d | d | d |
| RPneg_70739032_7.284   | RP    | neg        | 7.284           |            |            |      | 4        |         | 0.38325                    | 0.69665                                 | -0.27 | -0.16 | 1.10  | -0.30                 | -0.35 | 0.36  | 0.27127 | 0.78253 | -0.34    | -0.26                    | -0.02 | -0.29 | -0.10 | -0.50                      | -0.43 |   |   |   |                       |   |   |   |   |        |   |   |   |   |
| RPpos_7076844_11.8     | RP    | pos        | 11.8            | 7076844    |            |      | 4        |         | 0.39233                    | 0.70267                                 | 0.22  | -0.45 | 1.00  | 0.21                  | 0.04  | 0.58  | 0.56380 | 0.92038 | -0.21    | -0.08                    | -0.33 | -0.30 | -0.03 | -0.30                      | 0.04  |   |   |   |                       |   |   |   |   |        |   |   |   |   |
| RPneg_70776117_5.994   | RP    | neg        | 5.994           | 7077612    |            |      | 4        |         | 0.15992                    | 0.50333                                 | -0.17 | 0.12  | -0.06 | -0.28                 | -0.14 | -0.29 | 0.13157 | 0.62663 | -0.35    | -0.12                    | -0.31 | 0.08  | -0.30 | -0.71                      | -0.28 |   |   |   |                       |   |   |   |   |        |   |   |   |   |
| HILICneg_7077618_6.38  | HILIC | neg        | 6.38            | 7077618    |            |      | 4        |         | 0.11181                    | 0.44742                                 | -0.22 | 0.04  | -0.03 | -0.38                 | -0.20 | -0.23 | 0.12495 | 0.61589 | -0.35    | -0.11                    | -0.34 | -0.14 | -0.13 | -0.49                      | -0.36 |   |   |   |                       |   |   |   |   |        |   |   |   |   |
| RPpos_7078159_10.71    | RP    | pos        | 10.71           | 7078159    |            |      | 4        |         | 0.37650                    | 0.99035                                 | 0.01  | 0.13  | 0.22  | 0.06                  | 0.18  | 0.10  | 0.62411 | 0.93351 | -0.17    | -0.22                    | 0.02  | -0.04 | 0.30  | -0.59                      | -0.44 |   |   |   |                       |   |   |   |   |        |   |   |   |   |
| HILICpos_7083986_0.52  | HILIC | pos        | 0.52            | 7083986    |            |      | 4        |         | 0.40312                    | 0.71107                                 | -0.01 | -0.05 | 0.56  | -0.04                 | 0.19  | -0.13 | 0.00353 | 0.2107  | -0.39    | 0.19                     | 0.37  | 0.47  | 0.04  | 0.14                       | -0.19 |   |   |   |                       |   |   |   |   |        |   |   |   |   |
| RPneg_70842877_11.197  | RP    | neg        | 11.197          | 7084288    |            |      | 4        |         | 0.00024                    | 0.02990                                 | 1.65  | -0.10 | 0.45  | 1.43                  | 2.94  | -0.23 | 0.89896 | 0.98537 | -0.07    | -0.13                    | 0.20  | 0.02  | -0.03 | -0.31                      | -0.08 |   |   |   |                       |   |   |   |   |        |   |   |   |   |
| RPneg_70848022_11.188  | RP    | neg        | 11.188          | 7084802    |            |      | 4        |         | 0.00611                    | 0.15278                                 | 1.18  | 0.03  | 0.52  | 1.00                  | 1.97  | -0.31 | 0.93539 | 0.99000 | -0.03    | -0.25                    | 0.40  | -0.25 | 0.06  | -0.11                      | 0.10  |   |   |   |                       |   |   |   |   |        |   |   |   |   |
| RPneg_70848773_11.191  | RP    | neg        | 11.191          | 7084877    |            |      | 4        |         | 0.00762                    | 0.17157                                 | 0.86  | -0.11 | 0.35  | 0.83                  | 2.19  | -0.19 | 0.75740 | 0.96233 | -0.10    | -0.23                    | 0.12  | -0.34 | -0.11 | 0.05                       | 0.07  |   |   |   |                       |   |   |   |   |        |   |   |   |   |
| HILICpos_708509_3.04   | HILIC | pos        | 3.04            | 7085090    |            |      | 4        |         | 0.15039                    | 0.49265                                 | -0.38 | 0.08  | -0.12 | -0.05                 | 0.19  | 0.06  | 0.99757 | 0.99953 | -0.05    | 0.23                     | 0.00  | -0.62 | 0.17  | -0.21                      | 0.45  |   |   |   |                       |   |   |   |   |        |   |   |   |   |
| HILICpos_7085092_4.87  | HILIC | pos        | 4.87            | 7085092    |            |      | 4        |         | 0.00002                    | 0.00685                                 | -1.39 | 0.00  | -0.31 | -0.39                 | -0.71 | -0.05 | 0.01857 | 0.29000 | -0.45    | 0.45                     | 0.04  | -0.35 | -0.60 | -1.19                      | -0.78 |   |   |   |                       |   |   |   |   |        |   |   |   |   |
| HILICpos_7085093_6.21  | HILIC | pos        | 6.21            | 7085093    |            |      | 4        |         | 0.00185                    | 0.08650                                 | -0.95 | -0.40 | -0.59 | -0.43                 | 0.02  | 0.93  | 0.01777 | 0.28477 | -0.39    | -0.42                    | -0.50 | -1.00 | -0.24 | -0.66                      | 0.14  |   |   |   |                       |   |   |   |   |        |   |   |   |   |
| HILICpos_7085099_4.73  | HILIC | pos        | 4.73            | 7085099    |            |      | 4        |         | 0.99925                    | 0.99970                                 | 0.04  | -0.23 | 0.49  | 0.05                  | 0.40  | -0.12 | 0.01092 | 0.22216 | -0.65    | -0.61                    | -0.32 | 0.21  | -1.20 | -0.44                      | -0.10 |   |   |   |                       |   |   |   |   |        |   |   |   |   |
| RPpos_7085105_13.42    | RP    | pos        | 13.42           | 7085105    |            |      | 4        |         | 0.59430                    | 0.82616                                 | -0.14 | 0.07  | -0.31 | 0.65                  | 0.18  | 0.45  | 0.57244 | 0.92224 | -0.17    | -0.18                    | -0.12 | 0.03  | -1.06 | -0.08                      | 0.27  |   |   |   |                       |   |   |   |   |        |   |   |   |   |
| HILICpos_7085114_7.04  | HILIC | pos        | 7.04            | 7085114    |            |      | 4        |         | 0.18978                    | 0.53612                                 | -0.49 | -0.12 | 0.22  | -0.21                 | -0.35 | 0.24  | 0.64592 | 0.93835 | -0.13    | -0.19                    | 0.02  | 0.27  | -0.96 | -0.22                      | -0.11 |   |   |   |                       |   |   |   |   |        |   |   |   |   |
| RPpos_7090661_10.93    | RP    | pos        | 10.93           | 7090661    |            |      | 4        |         | 0.78120                    | 0.91426                                 | 0.04  | -0.14 | 1.16  | -0.02                 | -0.14 | 0.22  | 0.45968 | 0.88511 | -0.16    | -0.22                    | -0.04 | -0.15 | 0.14  | -0.36                      | -0.29 |   |   |   |                       |   |   |   |   |        |   |   |   |   |
| HILICpos_7090744_3.13  | HILIC | pos        | 3.13            | 7090744    |            |      | 4        |         | 0.28089                    | 0.61504                                 | -0.43 | -0.14 | 0.00  | -0.06                 | 0.07  | -0.55 | 0.72746 | 0.95671 | 0.05     | 0.18                     | 0.50  | 0.14  | 0.19  | -0.02                      | -0.10 |   |   |   |                       |   |   |   |   |        |   |   |   |   |
| HILICpos_709389_0.44   | HILIC | pos        | 0.44            | 7093890    |            |      | 4        |         | 0.49517                    | 0.77346                                 | -0.19 | -0.41 | 0.67  | 0.05                  | -0.33 | 0.13  | 0.41437 | 0.86469 | -0.24    | -0.19                    | -0.07 | -0.18 | 0.13  | -0.66                      | -0.40 |   |   |   |                       |   |   |   |   |        |   |   |   |   |
| RPpos_709395_10.79     | RP    | pos        | 10.79           | 7093955    |            |      | 4        |         | 0.64062                    | 0.84792                                 | -0.13 | -0.36 | 0.93  | 0.00                  | -0.25 | 0.51  | 0.62411 | 0.93351 | -0.17    | -0.22                    | 0.02  | -0.04 | 0.30  | -0.59                      | -0.30 |   |   |   |                       |   |   |   |   |        |   |   |   |   |
| RPpos_7093954_10.882   | RP    | pos        | 10.882          | 7093955    |            |      | 4        |         | 0.21220                    | 0.55485                                 | 0.26  | 0.16  | 0.01  | -0.25                 | 0.20  | -0.25 | 0.62697 | 0.93462 | -0.12    | -0.01                    | 0.29  | -0.62 | 0.15  | 0.01                       | 0.19  |   |   |   |                       |   |   |   |   |        |   |   |   |   |
| RPpos_7094125_10.62    | RP    | pos        | 10.62           | 7094125    |            |      | 4        |         | 0.03071                    | 0.29524                                 | 0.47  | -0.08 | 1.03  | 0.26                  | 0.96  | -0.19 | 0.96019 | 0.99553 | 0.06     | -0.14                    | 0.30  | 0.16  | -0.11 | -0.19                      | 0.39  |   |   |   |                       |   |   |   |   |        |   |   |   |   |
| RPneg_70950543_12.204  | RP    | neg        | 12.204          | 7095054    |            |      | 4        |         | 0.15739                    | 0.50067                                 | -0.30 | 0.38  | 0.00  | -0.56                 | -0.04 | -0.47 | 0.22831 | 0.74521 | -0.25    | 0.20                     | -0.16 | -0.60 | -0.21 | 0.24                       | -0.57 |   |   |   |                       |   |   |   |   |        |   |   |   |   |
| HILICneg_7095061_0.99  | HILIC | neg        | 0.99            | 7095061    |            |      | 4        |         | 0.02420                    | 0.27422                                 | -0.48 | -0.36 | -0.32 | -0.60                 | 0.10  | -0.01 | 0.26019 | 0.77446 | -0.26    | -0.57                    | -0.19 | -0.33 | -0.25 | 0.14                       | -0.38 |   |   |   |                       |   |   |   |   |        |   |   |   |   |
| RPpos_7097071_11.55    | RP    | pos        | 11.55           | 7097071    |            |      | 4        |         | 0.67311                    | 0.86385                                 | 0.08  | -0.17 | 1.14  | -0.19                 | 0.10  | 0.80  | 0.96136 | 0.99553 | -0.03    | -0.03                    | -0.07 | 0.24  | 0.37  | -0.65                      | -0.15 |   |   |   |                       |   |   |   |   |        |   |   |   |   |
| RPpos_7097343_10.93    | RP    | pos        | 10.93           | 7097343    |            |      | 4        |         | 0.98003                    | 0.99236                                 | -0.03 | -0.21 | 0.66  | 0.02                  | -0.09 | 0.18  | 0.65228 | 0.94010 | -0.13    | -0.01                    | 0.08  | -0.30 | 0.26  | -0.45                      | -0.24 |   |   |   |                       |   |   |   |   |        |   |   |   |   |
| RPpos_7097742_6        | RP    | pos        | 6               | 7097742    |            |      | 4        |         | 0.06056                    | 0.36756                                 | -0.24 | -0.01 | -0.07 | -0.41                 | -0.23 | 0.11  | 0.32825 | 0.81945 | -0.31    | 0.07                     | 0.65  | -0.34 | -0.58 | -0.36                      | -0.19 |   |   |   |                       |   |   |   |   |        |   |   |   |   |
| RPpos_7100435_11.55    | RP    | pos        | 11.55           | 7100435    |            |      | 4        |         | 0.56004                    | 0.80931                                 | 0.12  | -0.30 | 1.37  | -0.19                 | -0.17 | 0.60  | 0.72009 | 0.95557 | -0.15    | -0.03                    | -0.21 | 0.12  | 0.00  | -0.69                      | -0.09 |   |   |   |                       |   |   |   |   |        |   |   |   |   |
| RPneg_71025977_10.132  | RP    | neg        | 10.132          | 7102598    |            |      | 4        |         | 0.04188                    | 0.32631                                 | -0.48 | -0.35 | 0.01  | -0.36                 | -0.19 | -0.18 | 0.09788 | 0.56886 | 0.34     | 0.30                     | 0.31  | 0.51  | 0.30  | 0.07                       | 0.17  |   |   |   |                       |   |   |   |   |        |   |   |   |   |
| HILICpos_7103522_0.4   | HILIC | pos        | 0.4             | 7103522    |            |      | 4        |         | 0.81678                    | 0.93039                                 | 0.02  | -0.07 | 0.79  | -0.27                 | 0.06  | 0.42  | 0.32787 | 0.81922 | 0.21     | 0.18                     | 0.11  | 0.38  | 0.42  | -0.14                      | -0.41 |   |   |   |                       |   |   |   |   |        |   |   |   |   |
| RPpos_7103531_11.48    | RP    | pos        | 11.48           | 7103531    |            |      | 4        |         | 0.99000                    | 0.99629                                 | -0.02 | -0.25 | 0.68  | 0.04                  | -0.03 | 0.37  | 0.56635 | 0.92083 | -0.22    | -0.18                    | -0.10 | -0.18 | 0.12  | -0.64                      | -0.20 |   |   |   |                       |   |   |   |   |        |   |   |   |   |
| RPpos_7103756_11.55    | RP    | pos        | 11.55           | 7103756    |            |      | 4        |         | 0.93485                    | 0.97659                                 | 0.00  | -0.20 | 0.92  | -0.14                 | -0.02 | 0.47  | 0.67319 | 0.94628 | -0.17    | -0.26                    | -0.11 | 0.07  | -0.12 | -0.43                      | -0.17 |   |   |   |                       |   |   |   |   |        |   |   |   |   |
| HILICpos_7104146_1.67  | HILIC | pos        | 1.67            | 7104146    |            |      | 4        |         | 0.37688                    | 0.69196                                 | 0.20  | -0.12 | 0.44  | 0.16                  | 0.56  | 0.40  | 0.62951 | 0.93523 | -0.15    | -0.24                    | -0.05 | -0.15 | -0.11 | -0.30                      | -0.16 |   |   |   |                       |   |   |   |   |        |   |   |   |   |
| HILICpos_7106854_12.39 | RP    | pos        | 12.39           | 7106859    |            |      | 4        |         | 0.28649                    | 0.69903                                 | 0.22  | -0.06 | 0.89  | 0.07                  | 0.27  | 0.53  | 0.18509 | 0.70962 | -0.41    | 0.00                     | -0.54 | -0.40 | 0.06  | -0.68                      | -0.37 |   |   |   |                       |   |   |   |   |        |   |   |   |   |
| HILICpos_7110687_3.13  | HILIC | pos        | 3.13            | 7110687    |            |      | 4        |         | 0.28274                    | 0.61695                                 | -0.43 | -0.20 | -0.02 | 0.07                  | -0.04 | -0.78 | 0.75503 | 0.96233 | 0.04     | 0.13                     | 0.62  | 0.03  | 0.33  | -0.15                      | -0.01 |   |   |   |                       |   |   |   |   |        |   |   |   |   |
| RPneg_71117554_11.751  | RP    | neg        | 11.751          | 7111755    |            |      | 4        |         | 0.94088                    | 0.97832                                 | 0.24  | 0.53  | -0.05 | 0.28                  | 0.51  | -0.25 | 0.18391 | 0.70014 | 0.61     | 0.83                     | 0.53  | 0.56  | 0.58  | 0.39                       | -0.19 |   |   |   |                       |   |   |   |   |        |   |   |   |   |
| RPneg_7112677_10.57    | RP    | neg        | 10.57           | 7112677    |            |      | 4        |         | 0.04609                    | 0.33734                                 | -0.47 | -0.13 | 0.35  | -0.28                 | -0.07 | -0.40 | 0.19065 | 0.70592 | -0.37    | 0.15                     | -0.46 | -0.37 | -0.08 | 0.45                       | -0.97 |   |   |   |                       |   |   |   |   |        |   |   |   |   |
| RPpos_7113524_12.4     | RP    | pos        | 12.4            | 7113524    |            |      | 4        |         | 0.54884                    | 0.80347                                 | 0.11  | -0.04 | 0.69  | 0.02                  | 0.08  | 0.38  | 0.20872 | 0.72473 | -0.39    | -0.16                    | -0.36 | -0.35 | -0.23 | -0.78                      | -0.26 |   |   |   |                       |   |   |   |   |        |   |   |   |   |
| RPneg_71141113_10.921  | RP    | neg        | 10.921          | 7114111    |            |      | 4        |         | 0.00031                    | 0.03338                                 | 1.29  | -0.02 | 0.75  | 0.90                  | 1.93  | -0.08 | 0.83713 | 0.97582 | -0.02    | 0.28                     | 0.33  | -0.10 | -0.47 | 0.04                       | 0.13  |   |   |   |                       |   |   |   |   |        |   |   |   |   |
| RPpos_7115419_12.41    | RP    | pos        | 12.41           | 7115419    |            |      | 4        |         | 0.32066                    | 0.64713                                 | -0.20 | 0.34  | -0.03 | -0.60                 | 0.22  | -0.06 | 0.18769 | 0.70251 | -0.25    | -0.31                    | -0.08 | -0.20 | -0.16 | -0.35                      | -0.36 |   |   |   |                       |   |   |   |   |        |   |   |   |   |
| RPneg_71226007_10.132  | RP    | neg        | 10.132          | 7122601    |            |      | 4        |         | 0.03503                    | 0.30707                                 | -0.51 | -0.20 | 0.10  | -0.19                 | -0.22 | -1.12 | 0.63997 | 0.93638 | 0.13     | 0.09                     | 0.34  | 0.15  | 0.21  | -0.05                      | -0.25 |   |   |   |                       |   |   |   |   |        |   |   |   |   |
| RPneg_71227667_10.569  | RP    | neg        | 10.569          | 7122767    |            |      | 4        |         | 0.00736                    | 0.16879                                 | -0.59 | -0.13 | -0.49 | -0.01                 | -0.87 | 0.54  | 0.18361 | 0.69993 | 0.34     | 0.47                     | -0.27 | 0.16  | 0.47  | -0.24                      | 0.70  |   |   |   |                       |   |   |   |   |        |   |   |   |   |
| HILICpos_7123378_0.39  | HILIC | pos        | 0.39            | 7123378    |            |      | 4        |         | 0.31637                    | 0.64375                                 | -0.31 | 0.02  | 0.04  | -0.02                 | -0.04 | 0.06  | 0.52820 | 0.91029 | -0.19    | 0.05                     | 0.25  | -0.23 | 0.02  | -0.35                      | -0.68 |   |   |   |                       |   |   |   |   |        |   |   |   |   |
| HILICpos_7130673_3.13  | HILIC | pos        | 3.13            | 7130673    |            |      | 4        |         | 0.22216                    | 0.56450                                 | -0.48 | -0.19 | -0.07 | -0.10                 | -0.04 | -0.93 | 0.24498 | 0.76099 | 0.18     | 0.48                     | 0.54  | -0.14 | 0.34  | 0.19                       | 0.02  |   |   |   |                       |   |   |   |   |        |   |   |   |   |
| RPneg_7132821_10.892   | RP    | neg        | 10.892          | 7132821    |            |      | 4        |         | 0.07196                    | 0.38813                                 | -0.47 | 0.28  | 0.17  | -0.29                 | -0.64 | 0.18  | 0.65273 | 0.94010 | -0.33    | 0.58                     | -0.87 | -0.06 | 0.24  | -0.48                      | 0.22  |   |   |   |                       |   |   |   |   |        |   |   |   |   |
| HILICneg_7134719_5.85  | HILIC | neg        | 5.85            | 7134719    |            |      | 4        |         | 0.79345                    | 0.91969                                 | -0.01 | 0.45  | 0.56  | 0.14                  | 0.07  | -0.37 | 0.34792 | 0.83042 | 0.42     | -0.12                    | 0.57  | 0.86  | 0.50  | -0.11                      | -0.17 |   |   |   |                       |   |   |   |   |        |   |   |   |   |
| HILICneg_713472_4.93   | HILIC | neg        | 4.93            | 7134720    |            |      | 4        |         | 0.90943                    | 0.96643                                 | 0.04  | 0.36  | 0.52  | 0.47                  | 0.03  | 0.00  | 0.17182 | 0.68463 | -0.25    | 0.23                     | 0.32  | 0.31  | 0.20  | -0.28                      | -0.34 |   |   |   |                       |   |   |   |   |        |   |   |   |   |
| HILICneg_7134758_0.9   | HILIC | neg        | 0.9             | 7134758    |            |      | 4        |         | 0.71029                    | 0.88177                                 | -0.12 | -0.27 | 0.46  | 0.16                  | 0.07  | 0.40  | 0.67473 | 0.94679 | -0.20    | -0.46                    | -0.73 | -0.39 | 0.18  | 0.07                       | -0.76 |   |   |   |                       |   |   |   |   |        |   |   |   |   |
| RPneg_71427582_10.571  | RP    | neg        | 10.571          | 7142758    |            |      | 4        |         | 0.10139                    | 0.43366                                 | -0.55 | -0.11 | -0.25 | -0.18                 | 0.26  | 0.59  | 0.13621 | 0.63435 | -0.45    | -0.71                    | 0.35  | 0.00  | -0.54 | -0.30                      | -0.30 |   |   |   |                       |   |   |   |   |        |   |   |   |   |
| RPneg_71428998_10.781  | RP    | neg        | 10.781          | 7142900    |            |      | 4        |         | 0.05418                    | 0.35503                                 | -0.35 | 0.14  | -0.08 | -0.31                 | -0.44 | -0.32 | 0.28167 | 0.79044 | -0.03    | 0.13                     |       |       |       |                            |       |   |   |   |                       |   |   |   |   |        |   |   |   |   |



| Feature_ID             | Mode  | Ionization | Average_Rt.min. | Average_Mz | Metabolite | MSMS | ID_Level | HMDB_ID | IV-Alcohol self-administration (IV-ASA) |       |       |        |       |       |                       |         |         |         |       |       | IV-Alcohol clamp (IV-AC)   |       |       |         |   |   |                       |   |   |         |   |   |
|------------------------|-------|------------|-----------------|------------|------------|------|----------|---------|-----------------------------------------|-------|-------|--------|-------|-------|-----------------------|---------|---------|---------|-------|-------|----------------------------|-------|-------|---------|---|---|-----------------------|---|---|---------|---|---|
|                        |       |            |                 |            |            |      |          |         | Area Under the Curve (AUC)              |       |       |        |       |       | IV-Ghrelin or Placebo |         |         |         |       |       | Area Under the Curve (AUC) |       |       |         |   |   | IV-Ghrelin or Placebo |   |   |         |   |   |
|                        |       |            |                 |            |            |      |          |         | Baseline                                |       |       | IV-ASA |       |       | Ghrelin               |         |         | Placebo |       |       | Baseline                   |       |       | Post-LD |   |   | IV-AC                 |   |   | Post-AC |   |   |
|                        |       |            |                 |            |            |      |          |         | p                                       | q     | d     | d      | d     | d     | d                     | d       | d       | d       | d     | d     | p                          | q     | d     | d       | d | d | d                     | d | d | d       | d | d |
| HILICpos_717.3711_0.41 | HILIC | pos        | 0.41            | 717.3711   |            | 4    |          | 0.98323 | 0.93556                                 | -0.05 | -0.14 | 0.85   | -0.05 | 0.05  | 0.27                  | 0.68881 | 0.94980 | -0.16   | -0.10 | 0.00  | -0.25                      | 0.42  | -0.79 | -0.24   |   |   |                       |   |   |         |   |   |
| RPpos_717.5517_12.04   | RP    | pos        | 12.04           | 717.5517   |            | 4    |          | 0.02942 | 0.29103                                 | -0.41 | 0.15  | -0.18  | -0.41 | -0.10 | -0.14                 | 0.47955 | 0.89434 | -0.22   | -0.32 | -0.06 | -0.01                      | -0.30 | -0.09 | -0.29   |   |   |                       |   |   |         |   |   |
| HILICpos_717.5535_1.1  | HILIC | pos        | 1.1             | 717.5535   |            | 4    |          | 0.08094 | 0.40538                                 | -0.36 | 0.13  | -0.38  | -0.51 | 0.13  | -0.20                 | 0.49017 | 0.89836 | 0.06    | 0.15  | 0.52  | 0.23                       | -0.40 | -0.09 | -0.20   |   |   |                       |   |   |         |   |   |
| HILICpos_717.5878_0.9  | HILIC | pos        | 0.9             | 717.5878   |            | 4    |          | 0.66186 | 0.85819                                 | -0.12 | 0.04  | -0.30  | -0.03 | 0.56  | 0.24                  | 0.04757 | 0.43558 | -0.41   | -0.13 | -0.06 | -0.58                      | -0.35 | -0.30 | -0.64   |   |   |                       |   |   |         |   |   |
| RPpos_717.5888_1.3     | RP    | pos        | 1.3             | 717.5888   |            | 4    |          | 0.86642 | 0.94099                                 | 0.04  | 0.47  | -0.11  | -0.06 | 0.29  | 0.69                  | 0.01634 | 0.27369 | -0.38   | -0.21 | -0.44 | -0.55                      | -0.35 | -0.21 | -0.47   |   |   |                       |   |   |         |   |   |
| HILICpos_717.5911_0.84 | HILIC | pos        | 0.84            | 717.5911   |            | 4    |          | 0.68114 | 0.86757                                 | -0.07 | 0.38  | -0.20  | -0.22 | 0.40  | 0.20                  | 0.16743 | 0.67851 | -0.26   | -0.15 | -0.10 | -0.21                      | -0.28 | -0.17 | -0.47   |   |   |                       |   |   |         |   |   |
| RPpos_717.5912_12.89   | RP    | pos        | 12.89           | 717.5912   |            | 4    |          | 0.95987 | 0.82798                                 | -0.09 | 0.11  | -0.34  | -0.15 | 0.21  | 0.70                  | 0.04647 | 0.43175 | -0.35   | -0.27 | -0.12 | -0.39                      | -0.34 | -0.31 | -0.42   |   |   |                       |   |   |         |   |   |
| RPpos_717.76_6         | RP    | pos        | 6               | 717.7600   |            | 4    |          | 0.06058 | 0.36756                                 | -0.26 | -0.05 | -0.12  | -0.40 | -0.22 | 0.04                  | 0.38218 | 0.84832 | -0.27   | 0.11  | 0.12  | 0.05                       | -0.41 | -0.36 | -0.03   |   |   |                       |   |   |         |   |   |
| HILICpos_718.4918_0.4  | HILIC | pos        | 0.4             | 718.4918   |            | 4    |          | 0.06730 | 0.37964                                 | -0.40 | 0.02  | 0.27   | -0.13 | -0.22 | -0.06                 | 0.24133 | 0.75800 | -0.34   | -0.11 | -0.37 | 0.16                       | -0.25 | -0.59 | 0.83    |   |   |                       |   |   |         |   |   |
| RPpos_718.5734_13.84   | RP    | pos        | 13.84           | 718.5734   |            | 4    |          | 0.84040 | 0.93996                                 | -0.03 | 2.11  | -0.05  | -0.28 | 0.47  | -0.32                 | 0.34122 | 0.82659 | -0.24   | 0.03  | 0.11  | 0.10                       | -0.21 | -0.25 | -0.73   |   |   |                       |   |   |         |   |   |
| RPpos_718.8833_10.51   | RP    | pos        | 10.51           | 718.8833   |            | 4    |          | 0.77482 | 0.91117                                 | -0.06 | 0.39  | 0.98   | 0.00  | -0.20 | 0.12                  | 0.59351 | 0.92718 | -0.14   | -0.11 | 0.00  | -0.12                      | 0.11  | -0.41 | -0.39   |   |   |                       |   |   |         |   |   |
| RPpos_719.0642_11.12   | RP    | pos        | 11.12           | 719.0642   |            | 4    |          | 0.68570 | 0.87027                                 | 0.07  | -0.30 | 0.70   | 0.19  | -0.02 | 0.79                  | 0.64039 | 0.93638 | -0.15   | -0.37 | 0.05  | -0.32                      | 0.09  | -0.28 | -0.02   |   |   |                       |   |   |         |   |   |
| RPneg_719.26691_10.236 | RP    | neg        | 10.236          | 719.2669   |            | 4    |          | 0.24535 | 0.58617                                 | -0.32 | 0.18  | 0.64   | 0.01  | -0.49 | 0.48                  | 0.29148 | 0.79607 | -0.37   | -0.14 | -0.38 | -0.31                      | -0.77 | 0.26  | 0.80    |   |   |                       |   |   |         |   |   |
| RPpos_719.3977_11.12   | RP    | pos        | 11.12           | 719.3977   |            | 4    |          | 0.28637 | 0.61992                                 | 0.27  | -0.06 | 1.05   | 0.24  | 0.39  | 0.61                  | 0.62350 | 0.93343 | -0.14   | -0.39 | 0.08  | -0.23                      | 0.09  | -0.22 | -0.16   |   |   |                       |   |   |         |   |   |
| RPpos_719.4435_6.88    | RP    | pos        | 6.88            | 719.4435   |            | 4    |          | 0.93598 | 0.97697                                 | -0.02 | 0.16  | 0.25   | 0.06  | -0.06 | 0.70                  | 0.32131 | 0.81567 | -0.28   | -0.18 | -0.05 | -0.33                      | -0.29 | -0.39 | -0.26   |   |   |                       |   |   |         |   |   |
| HILICneg_719.5334_0.99 | HILIC | neg        | 0.99            | 719.5334   |            | 4    |          | 0.07020 | 0.38480                                 | -0.34 | 0.33  | -0.49  | -0.62 | 0.22  | -0.23                 | 0.01743 | 0.28131 | -0.43   | -0.41 | -0.28 | -0.54                      | -0.19 | -0.50 | -0.66   |   |   |                       |   |   |         |   |   |
| HILICneg_719.5341_0.94 | HILIC | neg        | 0.94            | 719.5341   |            | 4    |          | 0.11128 | 0.44673                                 | -0.36 | 0.19  | -0.39  | -0.80 | 0.36  | -0.48                 | 0.43503 | 0.87634 | -0.16   | -0.25 | 0.20  | -0.13                      | -0.13 | -0.15 | -0.51   |   |   |                       |   |   |         |   |   |
| RPpos_719.571_11.86    | RP    | pos        | 11.86           | 719.5710   |            | 4    |          | 0.91952 | 0.97060                                 | -0.07 | 0.13  | 0.04   | -0.24 | 0.31  | 0.21                  | 0.91441 | 0.98763 | 0.02    | 0.15  | 0.31  | 0.07                       | -0.19 | 0.01  | -0.25   |   |   |                       |   |   |         |   |   |
| RPpos_719.7065_11.79   | RP    | pos        | 11.79           | 719.7065   |            | 4    |          | 0.49378 | 0.77316                                 | 0.16  | -0.13 | 0.98   | 0.04  | 0.14  | 0.31                  | 0.69283 | 0.95008 | -0.16   | -0.14 | -0.31 | -0.07                      | -0.15 | -0.39 | -0.20   |   |   |                       |   |   |         |   |   |
| RPpos_719.7302_11.12   | RP    | pos        | 11.12           | 719.7302   |            | 4    |          | 0.77680 | 0.91224                                 | 0.05  | -0.15 | 1.01   | 0.11  | 0.05  | 0.50                  | 0.75856 | 0.96233 | -0.09   | -0.23 | 0.10  | -0.13                      | 0.22  | -0.31 | -0.23   |   |   |                       |   |   |         |   |   |
| RPpos_719.8461_11.24   | RP    | pos        | 11.24           | 719.8461   |            | 4    |          | 0.74881 | 0.90000                                 | -0.09 | -0.17 | 0.65   | -0.28 | -0.16 | 0.91                  | 0.70257 | 0.95203 | -0.17   | -0.14 | 0.09  | 0.00                       | 0.30  | -0.47 | -0.62   |   |   |                       |   |   |         |   |   |
| RPpos_720.0412_11.79   | RP    | pos        | 11.79           | 720.0412   |            | 4    |          | 0.39066 | 0.70176                                 | 0.18  | -0.12 | 0.89   | -0.02 | 0.27  | 0.48                  | 0.60200 | 0.92848 | -0.19   | -0.10 | -0.11 | -0.18                      | 0.02  | -0.56 | -0.18   |   |   |                       |   |   |         |   |   |
| RPpos_720.3727_11.78   | RP    | pos        | 11.78           | 720.3727   |            | 4    |          | 0.32920 | 0.65340                                 | 0.27  | 0.04  | 1.18   | 0.14  | 0.28  | 0.35                  | 0.42873 | 0.87302 | -0.25   | -0.18 | -0.18 | -0.05                      | 0.03  | -0.72 | -0.19   |   |   |                       |   |   |         |   |   |
| HILICneg_720.4968_0.65 | HILIC | neg        | 0.65            | 720.4968   |            | 4    |          | 0.49462 | 0.77346                                 | -0.20 | -0.06 | -0.05  | -0.28 | -0.04 | -0.17                 | 0.64563 | 0.93826 | -0.15   | 0.04  | -0.19 | 0.07                       | 0.10  | -0.13 | -0.46   |   |   |                       |   |   |         |   |   |
| RPpos_720.5323_12.26   | RP    | pos        | 12.26           | 720.5323   |            | 4    |          | 0.28546 | 0.61902                                 | -0.25 | 0.30  | -0.10  | -0.40 | 0.11  | -0.36                 | 0.70057 | 0.95161 | -0.13   | -0.20 | 0.33  | -0.17                      | 0.06  | -0.09 | -0.55   |   |   |                       |   |   |         |   |   |
| RPpos_720.685_12.75    | RP    | pos        | 12.75           | 720.6850   |            | 4    |          | 0.66693 | 0.86056                                 | 0.09  | 0.09  | 0.22   | -0.04 | 0.24  | 0.34                  | 0.34072 | 0.82628 | -0.29   | -0.23 | -0.14 | -0.23                      | -0.31 | -0.90 | -0.01   |   |   |                       |   |   |         |   |   |
| RPpos_720.7063_11.79   | RP    | pos        | 11.79           | 720.7063   |            | 4    |          | 0.49673 | 0.77423                                 | 0.14  | -0.16 | 1.04   | 0.05  | 0.08  | 0.41                  | 0.56266 | 0.92016 | -0.19   | -0.16 | -0.16 | -0.22                      | 0.04  | -0.53 | -0.02   |   |   |                       |   |   |         |   |   |
| RPpos_721.0146_12.75   | RP    | pos        | 12.75           | 721.0146   |            | 4    |          | 0.64325 | 0.84907                                 | 0.10  | 0.04  | 0.79   | -0.04 | 0.07  | 0.19                  | 0.38242 | 0.84834 | -0.31   | -0.11 | -0.17 | -0.18                      | 0.27  | -1.11 | -0.21   |   |   |                       |   |   |         |   |   |
| RPpos_721.3063_11.73   | RP    | pos        | 11.73           | 721.3063   |            | 4    |          | 0.55595 | 0.80733                                 | 0.44  | 0.73  | 0.30   | 0.36  | 0.61  | -0.24                 | 0.08979 | 0.55360 | 0.72    | 1.15  | 0.63  | 0.68                       | 0.65  | 0.55  | 0.11    |   |   |                       |   |   |         |   |   |
| RPpos_721.3488_12.75   | RP    | pos        | 12.75           | 721.3488   |            | 4    |          | 0.88877 | 0.95951                                 | 0.04  | 0.02  | 0.56   | -0.38 | 0.32  | 0.44                  | 0.80076 | 0.96969 | -0.14   | 0.04  | 0.09  | -0.10                      | -0.15 | -1.08 | -0.15   |   |   |                       |   |   |         |   |   |
| RPneg_721.34912_11.659 | RP    | neg        | 11.659          | 721.3491   |            | 4    |          | 0.34006 | 0.66249                                 | 0.10  | 0.25  | 0.58   | 0.21  | 0.25  | -0.28                 | 0.03554 | 0.38501 | 0.68    | 0.52  | 0.43  | 0.47                       | 0.89  | 0.80  | 0.68    |   |   |                       |   |   |         |   |   |
| RPneg_721.55212_12.477 | RP    | neg        | 12.477          | 721.5521   |            | 4    |          | 0.49679 | 0.77423                                 | -0.11 | 0.53  | -0.19  | -0.16 | 0.07  | -0.45                 | 0.03171 | 0.36926 | -0.57   | -0.86 | 0.17  | -0.87                      | -0.20 | -0.26 | -0.31   |   |   |                       |   |   |         |   |   |
| RPpos_722.0248_11.78   | RP    | pos        | 11.78           | 722.0248   |            | 4    |          | 0.28330 | 0.61745                                 | 0.21  | -0.02 | 0.93   | 0.04  | 0.21  | 0.49                  | 0.31729 | 0.81359 | -0.30   | 0.05  | -0.24 | -0.05                      | -0.51 | -0.13 | -0.20   |   |   |                       |   |   |         |   |   |
| RPpos_722.1692_11      | RP    | pos        | 11              | 722.1692   |            | 4    |          | 0.33163 | 0.65566                                 | 0.42  | 0.30  | 0.35   | 0.52  | 0.28  | 0.21                  | 0.37466 | 0.84351 | 0.11    | 0.05  | 0.23  | 0.06                       | 1.06  | -0.32 | 0.27    |   |   |                       |   |   |         |   |   |
| RPneg_722.29004_9.964  | RP    | neg        | 9.964           | 722.2900   |            | 4    |          | 0.07469 | 0.39316                                 | -0.32 | -0.06 | -0.14  | -0.16 | -0.20 | -0.56                 | 0.49638 | 0.90020 | -0.15   | -0.19 | -0.02 | -0.16                      | 0.12  | 0.00  | -0.67   |   |   |                       |   |   |         |   |   |
| RPneg_722.49921_12.264 | RP    | neg        | 12.264          | 722.4992   |            | 4    |          | 0.66629 | 0.86030                                 | -0.11 | 0.12  | 0.12   | -0.13 | 0.09  | -0.25                 | 0.22145 | 0.73820 | -0.32   | -0.41 | -0.21 | -0.16                      | -0.42 | -0.29 | -0.52   |   |   |                       |   |   |         |   |   |
| HILICneg_722.5141_0.65 | HILIC | neg        | 0.65            | 722.5141   |            | 4    |          | 0.79167 | 0.91879                                 | -0.22 | 0.18  | 0.00   | -0.31 | 0.08  | -0.47                 | 0.17700 | 0.69228 | 1.12    | 0.79  | 1.03  | 1.11                       | 0.94  | 0.41  | 0.00    |   |   |                       |   |   |         |   |   |
| HILICneg_722.5143_0.73 | HILIC | neg        | 0.73            | 722.5143   |            | 4    |          | 0.27212 | 0.60803                                 | -0.32 | 0.10  | -0.26  | -0.33 | 0.13  | -0.47                 | 0.13400 | 0.63100 | 1.02    | 0.66  | 0.51  | 1.49                       | 1.49  | 0.47  | 0.32    |   |   |                       |   |   |         |   |   |
| RPpos_722.5258_13.42   | RP    | pos        | 13.42           | 722.5258   |            | 4    |          | 0.42158 | 0.72423                                 | -0.25 | 0.37  | -0.18  | 0.37  | 0.40  | 0.46                  | 0.92301 | 0.98898 | -0.04   | 0.12  | 0.15  | 0.44                       | -0.56 | 0.01  | -0.18   |   |   |                       |   |   |         |   |   |
| RPpos_722.5508_12.68   | RP    | pos        | 12.68           | 722.5508   |            | 4    |          | 0.45990 | 0.75068                                 | -0.14 | 0.70  | -0.26  | -0.26 | 0.09  | 0.04                  | 0.12211 | 0.61030 | -0.27   | 0.09  | -0.05 | -0.36                      | -0.26 | -0.06 | -0.57   |   |   |                       |   |   |         |   |   |
| RPneg_723.22772_5.999  | RP    | neg        | 5.999           | 723.2277   |            | 4    |          | 0.30592 | 0.63469                                 | -0.15 | 0.13  | -0.08  | -0.18 | -0.16 | -0.39                 | 0.04287 | 0.41729 | -0.59   | -0.30 | -0.54 | -0.14                      | -0.49 | -0.63 | -0.61   |   |   |                       |   |   |         |   |   |
| RPpos_723.3983_10.48   | RP    | pos        | 10.48           | 723.3983   |            | 4    |          | 0.27018 | 0.60656                                 | 0.41  | 0.03  | 0.21   | 0.26  | 0.39  | 1.39                  | 0.18881 | 0.70379 | -0.33   | 0.04  | -0.38 | -0.35                      | -0.56 | 0.06  | 0.09    |   |   |                       |   |   |         |   |   |
| RPneg_723.40314_5.697  | RP    | neg        | 5.697           | 723.4031   |            | 4    |          | 0.37308 | 0.68884                                 | -0.22 | 0.13  | 0.68   | -0.37 | -0.20 | 0.12                  | 0.06150 | 0.48401 | -0.25   | -0.18 | -0.10 | -0.28                      | -0.09 | 0.15  | -0.54   |   |   |                       |   |   |         |   |   |
| RPpos_723.4261_10.17   | RP    | pos        | 10.17           | 723.4261   |            | 4    |          | 0.46085 | 0.75153                                 | 0.14  | 0.33  | 0.40   | 0.12  | 0.22  | 0.60                  | 0.13935 | 0.64025 | -0.15   | -0.20 | -0.07 | -0.15                      | -0.02 | -0.21 | -0.29   |   |   |                       |   |   |         |   |   |
| RPpos_723.4365_5.84    | RP    | pos        | 5.84            | 723.4365   |            | 4    |          | 0.45654 | 0.74842                                 | -     |       |        |       |       |                       |         |         |         |       |       |                            |       |       |         |   |   |                       |   |   |         |   |   |

| Feature_ID             | Mode  | Ionization | Average_Rt.min. | Average_Mz | Metabolite | MSMS | ID_Level | HMDB_ID | IV-Alcohol self-administration (IV-ASA) |         |       |                       |       |       |       |       |        |         | IV-Alcohol clamp (IV-AC)   |       |       |          |       |         |       |                       |   |   |   |   |        |   |   |   |   |
|------------------------|-------|------------|-----------------|------------|------------|------|----------|---------|-----------------------------------------|---------|-------|-----------------------|-------|-------|-------|-------|--------|---------|----------------------------|-------|-------|----------|-------|---------|-------|-----------------------|---|---|---|---|--------|---|---|---|---|
|                        |       |            |                 |            |            |      |          |         | Area Under the Curve (AUC)              |         |       | IV-Ghrelin or Placebo |       |       |       |       | BrAC=0 |         | Area Under the Curve (AUC) |       |       | Baseline |       | Post-LD |       | IV-Ghrelin or Placebo |   |   |   |   | BrAC=0 |   |   |   |   |
|                        |       |            |                 |            |            |      |          |         | p                                       | q       | d     | d                     | d     | d     | d     | d     | d      | d       | p                          | q     | d     | d        | d     | d       | d     | d                     | d | d | d | d | d      | d | d | d | d |
|                        |       |            |                 |            |            |      |          |         |                                         |         |       |                       |       |       |       |       |        |         |                            |       |       |          |       |         |       |                       |   |   |   |   |        |   |   |   |   |
| RPpos_729.4063_7.36    | RP    | pos        | 7.36            | 729.4063   |            |      | 4        |         | 0.89601                                 | 0.96217 | 0.02  | -0.27                 | 1.02  | 0.09  | -0.12 | 0.92  |        | 0.28558 | 0.79324                    | -0.39 | -0.40 | -0.01    | -0.59 | -0.06   | -0.26 | -0.41                 |   |   |   |   |        |   |   |   |   |
| HILICpos_729.5887_0.83 | HILIC | pos        | 0.83            | 729.5887   |            |      | 4        |         | 0.52511                                 | 0.79057 | -0.12 | 0.51                  | 0.17  | -0.50 | 0.52  | -0.11 |        | 0.58834 | 0.92635                    | -0.12 | -0.09 | 0.25     | -0.08 | -0.03   | -0.03 | -0.54                 |   |   |   |   |        |   |   |   |   |
| HILICpos_729.5904_0.88 | HILIC | pos        | 0.88            | 729.5904   |            |      | 4        |         | 0.69231                                 | 0.87364 | -0.08 | 0.48                  | 0.01  | -0.43 | 0.87  | -0.07 |        | 0.53511 | 0.91371                    | -0.15 | -0.08 | -0.05    | -0.25 | -0.01   | -0.08 | -0.34                 |   |   |   |   |        |   |   |   |   |
| RPpos_729.7047_12.05   | RP    | pos        | 12.05           | 729.7047   |            |      | 4        |         | 0.48238                                 | 0.76589 | 0.17  | -0.01                 | 0.94  | -0.05 | 0.25  | 0.58  |        | 0.57850 | 0.92351                    | -0.21 | -0.12 | -0.01    | -0.13 | 0.02    | -0.77 | -0.21                 |   |   |   |   |        |   |   |   |   |
| RPpos_729.9062_10.5    | RP    | pos        | 10.5            | 729.9062   |            |      | 4        |         | 0.57923                                 | 0.81871 | -0.15 | -0.16                 | 0.56  | -0.08 | -0.39 | 0.77  |        | 0.44661 | 0.88064                    | -0.17 | -0.22 | -0.21    | -0.16 | -0.01   | -0.31 | -0.51                 |   |   |   |   |        |   |   |   |   |
| RPpos_730.0366_12.05   | RP    | pos        | 12.05           | 730.0366   |            |      | 4        |         | 0.74803                                 | 0.86877 | 0.03  | -0.27                 | 0.86  | -0.13 | -0.01 | 0.60  |        | 0.66594 | 0.92077                    | -0.17 | -0.23 | -0.20    | -0.10 | 0.05    | -0.40 | -0.13                 |   |   |   |   |        |   |   |   |   |
| HILICpos_730.0629_0.46 | HILIC | pos        | 0.46            | 730.0629   |            |      | 4        |         | 0.70659                                 | 0.88017 | 0.18  | 0.35                  | 0.61  | 0.12  | 0.16  | 0.33  |        | 0.56608 | 0.92078                    | -0.17 | -0.19 | -0.24    | -0.07 | 0.50    | -0.51 | -0.36                 |   |   |   |   |        |   |   |   |   |
| RPpos_730.3704_12.05   | RP    | pos        | 12.05           | 730.3704   |            |      | 4        |         | 0.35830                                 | 0.67275 | 0.19  | 0.09                  | 0.89  | 0.08  | 0.15  | 0.54  |        | 0.48780 | 0.89808                    | -0.24 | -0.26 | -0.15    | -0.16 | -0.07   | -0.68 | -0.04                 |   |   |   |   |        |   |   |   |   |
| HILICpos_730.5373_0.61 | HILIC | pos        | 0.61            | 730.5373   |            |      | 4        |         | 0.37132                                 | 0.68743 | -0.22 | 0.00                  | -0.13 | -0.13 | 0.08  | 0.34  |        | 0.80126 | 0.96981                    | -0.07 | -0.07 | -0.04    | -0.15 | 0.04    | -0.05 | -0.14                 |   |   |   |   |        |   |   |   |   |
| RPpos_730.7029_12.05   | RP    | pos        | 12.05           | 730.7029   |            |      | 4        |         | 0.72431                                 | 0.88758 | 0.05  | -0.12                 | 0.76  | -0.20 | 0.09  | 0.35  |        | 0.54858 | 0.91689                    | -0.21 | -0.21 | -0.18    | -0.11 | -0.05   | -0.54 | -0.20                 |   |   |   |   |        |   |   |   |   |
| RPneg_731.23596_9.966  | RP    | neg        | 9.966           | 731.2360   |            |      | 4        |         | 0.47079                                 | 0.75785 | -0.15 | -0.10                 | 0.16  | -0.08 | 0.06  | -0.51 |        | 0.47614 | 0.89297                    | 0.23  | 0.14  | 0.15     | 0.21  | 0.53    | 0.30  | 0.10                  |   |   |   |   |        |   |   |   |   |
| RPneg_731.31622_4.674  | RP    | neg        | 4.674           | 731.3162   |            |      | 4        |         | 0.24320                                 | 0.58434 | -0.12 | 0.05                  | -0.02 | -0.34 | 0.04  | 0.07  |        | 0.31004 | 0.80841                    | -0.41 | 0.51  | -0.37    | 0.15  | -0.20   | -0.42 | -0.22                 |   |   |   |   |        |   |   |   |   |
| RPneg_731.31628_4.83   | RP    | neg        | 4.83            | 731.3163   |            |      | 4        |         | 0.20845                                 | 0.55144 | -0.15 | 0.23                  | 0.00  | -0.41 | -0.13 | -0.01 |        | 0.41048 | 0.86341                    | -0.36 | 0.61  | -0.33    | 0.21  | 0.05    | -0.41 | -0.25                 |   |   |   |   |        |   |   |   |   |
| HILICneg_731.3167_7.34 | HILIC | neg        | 7.34            | 731.3167   |            |      | 4        |         | 0.18573                                 | 0.53264 | -0.10 | 0.30                  | 0.04  | -0.35 | -0.11 | 0.25  |        | 0.33540 | 0.82321                    | -0.43 | 0.31  | -0.32    | 0.06  | -0.12   | -0.43 | -0.33                 |   |   |   |   |        |   |   |   |   |
| RPpos_731.4051_10.78   | RP    | pos        | 10.78           | 731.4051   |            |      | 4        |         | 0.64207                                 | 0.84842 | -0.14 | -0.35                 | 1.04  | -0.14 | -0.24 | 0.39  |        | 0.60395 | 0.92892                    | -0.17 | -0.16 | 0.05     | -0.15 | 0.10    | -0.60 | -0.31                 |   |   |   |   |        |   |   |   |   |
| HILICpos_731.4053_0.44 | HILIC | pos        | 0.44            | 731.4053   |            |      | 4        |         | 0.47974                                 | 0.76387 | -0.19 | -0.48                 | 0.78  | -0.16 | -0.26 | 0.45  |        | 0.46903 | 0.88943                    | -0.24 | -0.15 | -0.02    | -0.28 | 0.06    | -0.66 | -0.23                 |   |   |   |   |        |   |   |   |   |
| RPpos_731.4144_12.47   | RP    | pos        | 12.47           | 731.4144   |            |      | 4        |         | 0.24260                                 | 0.58353 | 0.27  | -0.22                 | 0.67  | 0.76  | -0.08 | 0.24  |        | 0.26730 | 0.77930                    | 0.47  | 0.62  | -0.18    | 0.65  | -0.23   | 0.41  | -0.23                 |   |   |   |   |        |   |   |   |   |
| RPneg_731.41528_11.19  | RP    | neg        | 11.19           | 731.4153   |            |      | 4        |         | 0.01649                                 | 0.23757 | 1.13  | -0.04                 | 0.60  | 1.19  | 1.71  | -0.51 |        | 0.72900 | 0.95705                    | 0.08  | -0.19 | 0.45     | -0.51 | 0.07    | 0.34  | 0.22                  |   |   |   |   |        |   |   |   |   |
| RPneg_731.53528_12.092 | RP    | neg        | 12.092          | 731.5353   |            |      | 4        |         | 0.57576                                 | 0.81616 | -0.19 | -0.17                 | -0.08 | -0.23 | 0.09  | -0.06 |        | 0.77925 | 0.96562                    | -0.14 | -0.01 | -0.21    | -0.01 | -0.04   | -0.09 | -0.09                 |   |   |   |   |        |   |   |   |   |
| RPpos_731.607_13.39    | RP    | pos        | 13.39           | 731.6070   |            |      | 4        |         | 0.97085                                 | 0.98887 | 0.02  | 0.22                  | 0.15  | -0.10 | 0.33  | 0.37  |        | 0.05258 | 0.65545                    | -0.61 | 0.19  | -0.03    | -0.51 | 0.57    | -0.59 | -0.76                 |   |   |   |   |        |   |   |   |   |
| HILICpos_732.3419_1.07 | HILIC | pos        | 1.07            | 732.3419   |            |      | 4        |         | 0.28870                                 | 0.62218 | 0.31  | 0.22                  | 1.24  | 0.96  | 0.15  | -0.34 |        | 0.47777 | 0.89354                    | 0.24  | 0.28  | 0.15     | 0.12  | 0.48    | 0.09  | -0.27                 |   |   |   |   |        |   |   |   |   |
| RPpos_732.3673_11.47   | RP    | pos        | 11.47           | 732.3673   |            |      | 4        |         | 0.86479                                 | 0.94954 | 0.01  | -0.31                 | 0.53  | 0.07  | 0.00  | 0.58  |        | 0.72172 | 0.95590                    | -0.17 | -0.16 | -0.18    | 0.04  | 0.13    | -0.61 | -0.12                 |   |   |   |   |        |   |   |   |   |
| HILICpos_732.5528_0.61 | HILIC | pos        | 0.61            | 732.5528   |            |      | 4        |         | 0.48449                                 | 0.76726 | -0.07 | 0.19                  | 0.06  | -0.08 | 0.11  | -0.01 |        | 0.84816 | 0.97736                    | 0.05  | 0.12  | 0.14     | 0.18  | 0.17    | 0.04  | -0.13                 |   |   |   |   |        |   |   |   |   |
| RPpos_733.3319_4.84    | RP    | pos        | 4.84            | 733.3319   |            |      | 4        |         | 0.13496                                 | 0.47413 | -0.21 | 0.11                  | -0.05 | -0.41 | -0.16 | -0.33 |        | 0.31462 | 0.81205                    | -0.43 | 0.63  | -0.30    | 0.20  | 0.00    | -0.38 | -0.27                 |   |   |   |   |        |   |   |   |   |
| HILICpos_733.3322_7.3  | HILIC | pos        | 7.3             | 733.3322   |            |      | 4        |         | 0.14383                                 | 0.48433 | -0.14 | 0.24                  | -0.01 | -0.33 | -0.14 | 0.24  |        | 0.47539 | 0.89273                    | -0.32 | 0.33  | -0.32    | 0.30  | 0.00    | -0.35 | -0.37                 |   |   |   |   |        |   |   |   |   |
| RPneg_733.41687_11.193 | RP    | neg        | 11.193          | 733.4169   |            |      | 4        |         | 0.00082                                 | 0.05766 | 1.45  | 0.15                  | 0.52  | 1.18  | 3.16  | -0.40 |        | 0.78220 | 0.96597                    | -0.09 | -0.27 | 0.36     | -0.12 | -0.13   | -0.23 | -0.02                 |   |   |   |   |        |   |   |   |   |
| RPpos_733.4408_7.43    | RP    | pos        | 7.43            | 733.4408   |            |      | 4        |         | 0.39314                                 | 0.70343 | -0.28 | 0.19                  | 0.58  | -0.21 | -0.33 | 0.71  |        | 0.50015 | 0.90134                    | -0.22 | -0.23 | 0.38     | -0.09 | -0.10   | -0.45 | -0.40                 |   |   |   |   |        |   |   |   |   |
| RPneg_733.54877_12.468 | RP    | neg        | 12.468          | 733.5488   |            |      | 4        |         | 0.13491                                 | 0.47413 | -0.35 | -0.30                 | -0.46 | -0.21 | -0.15 | 0.29  |        | 0.28937 | 0.79452                    | -0.23 | -0.30 | 0.29     | -0.31 | -0.22   | -0.18 | 0.03                  |   |   |   |   |        |   |   |   |   |
| HILICneg_733.5497_0.98 | HILIC | neg        | 0.98            | 733.5497   |            |      | 4        |         | 0.15680                                 | 0.49973 | -0.34 | 0.31                  | -0.46 | -0.30 | -0.07 | -0.05 |        | 0.01608 | 0.27178                    | -0.37 | -0.49 | -0.54    | -0.01 | -0.31   | -0.21 | -0.42                 |   |   |   |   |        |   |   |   |   |
| RPpos_733.7391_11.12   | RP    | pos        | 11.12           | 733.7391   |            |      | 4        |         | 0.74953                                 | 0.90015 | 0.05  | -0.10                 | 0.55  | 0.11  | 0.11  | 0.36  |        | 0.99741 | 0.99953                    | -0.04 | -0.22 | -0.15    | 0.01  | 0.32    | -0.23 | -0.06                 |   |   |   |   |        |   |   |   |   |
| RPpos_734.0717_11.12   | RP    | pos        | 11.12           | 734.0717   |            |      | 4        |         | 0.48042                                 | 0.76416 | 0.17  | -0.42                 | 1.44  | -0.03 | 0.28  | 1.24  |        | 0.28391 | 0.79235                    | -0.29 | -0.40 | -0.31    | -0.25 | 0.19    | -0.49 | -0.36                 |   |   |   |   |        |   |   |   |   |
| HILICneg_734.1747_0.49 | HILIC | neg        | 0.49            | 734.1747   |            |      | 4        |         | 0.09227                                 | 0.42120 | -0.44 | -0.58                 | -0.08 | -0.44 | -0.19 | -0.66 |        | 0.33662 | 0.82415                    | -0.32 | 0.30  | 0.05     | 0.95  | 0.38    | 0.15  | -0.11                 |   |   |   |   |        |   |   |   |   |
| RPneg_734.2468_9.965   | RP    | neg        | 9.965           | 734.2468   |            |      | 4        |         | 0.12710                                 | 0.46383 | -0.19 | -0.11                 | -0.11 | -0.10 | -0.05 | -0.37 |        | 0.77547 | 0.96491                    | -0.04 | 0.02  | 0.04     | -0.07 | 0.18    | -0.04 | -0.31                 |   |   |   |   |        |   |   |   |   |
| RPpos_734.3831_11.77   | RP    | pos        | 11.77           | 734.3831   |            |      | 4        |         | 0.67327                                 | 0.86385 | 0.09  | -0.01                 | 0.52  | -0.07 | 0.16  | 0.58  |        | 0.66843 | 0.94464                    | -0.17 | -0.13 | -0.19    | -0.17 | 0.03    | 0.59  | 0.02                  |   |   |   |   |        |   |   |   |   |
| RPpos_734.4072_11.12   | RP    | pos        | 11.12           | 734.4072   |            |      | 4        |         | 0.90061                                 | 0.96346 | 0.02  | 0.04                  | 0.69  | -0.19 | 0.33  | -0.05 |        | 0.51421 | 0.90648                    | -0.21 | -0.01 | -0.29    | -0.04 | 0.08    | -0.60 | -0.14                 |   |   |   |   |        |   |   |   |   |
| RPpos_734.7156_11.77   | RP    | pos        | 11.77           | 734.7156   |            |      | 4        |         | 0.46288                                 | 0.75269 | 0.17  | -0.08                 | 0.90  | 0.09  | 0.22  | 0.33  |        | 0.76083 | 0.96260                    | -0.14 | -0.22 | -0.09    | -0.10 | 0.09    | -0.40 | -0.14                 |   |   |   |   |        |   |   |   |   |
| RPpos_734.8401_11.47   | RP    | pos        | 11.47           | 734.8401   |            |      | 4        |         | 0.56491                                 | 0.81160 | -0.17 | -0.31                 | 0.53  | -0.56 | 0.17  | 0.14  |        | 0.44673 | 0.88064                    | -0.27 | -0.04 | -0.42    | 0.02  | 0.21    | -0.37 | -0.38                 |   |   |   |   |        |   |   |   |   |
| HILICneg_734.9236_0.49 | HILIC | neg        | 0.49            | 734.9236   |            |      | 4        |         | 0.00099                                 | 0.06410 | 0.19  | 0.04                  | 0.20  | 0.13  | 0.45  | 0.18  |        | 0.68783 | 0.94936                    | -0.01 | 0.04  | -0.09    | -0.03 | 0.07    | 0.06  | -0.12                 |   |   |   |   |        |   |   |   |   |
| RPpos_735.0489_11.77   | RP    | pos        | 11.77           | 735.0489   |            |      | 4        |         | 0.68009                                 | 0.83304 | 0.13  | -0.16                 | 0.84  | 0.15  | 0.00  | 0.62  |        | 0.57189 | 0.92208                    | -0.21 | -0.16 | -0.05    | -0.22 | 0.07    | -0.60 | -0.31                 |   |   |   |   |        |   |   |   |   |
| RPpos_735.2883_11.74   | RP    | pos        | 11.74           | 735.2883   |            |      | 4        |         | 0.77086                                 | 0.91013 | 0.30  | 0.78                  | 0.10  | 0.25  | 0.62  | -0.38 |        | 0.14702 | 0.65072                    | 0.64  | 1.06  | 1.21     | 0.84  | 0.33    | 0.34  | -0.41                 |   |   |   |   |        |   |   |   |   |
| RPneg_735.32349_7.429  | RP    | neg        | 7.429           | 735.3235   |            |      | 4        |         | 0.57369                                 | 0.81586 | 0.13  | 0.06                  | 0.24  | 0.23  | 0.44  | 0.04  |        | 0.01201 | 0.23387                    | 0.14  | -0.06 | 0.       |       |         |       |                       |   |   |   |   |        |   |   |   |   |

| Feature_ID                | Mode  | Ionization | Average Rt.min. | Average.Mz | Metabolite | MSMS | ID_Level | HMDB_ID | IV-Alcohol self-administration (IV-ASA) |         |       |       |       |       |                       |        |         |         |       |       | IV-Alcohol clamp (IV-AC)   |       |       |          |         |       |                       |        |  |  |  |  |
|---------------------------|-------|------------|-----------------|------------|------------|------|----------|---------|-----------------------------------------|---------|-------|-------|-------|-------|-----------------------|--------|---------|---------|-------|-------|----------------------------|-------|-------|----------|---------|-------|-----------------------|--------|--|--|--|--|
|                           |       |            |                 |            |            |      |          |         | Area Under the Curve (AUC)              |         |       |       |       |       | IV-Ghrelin or Placebo |        |         |         |       |       | Area Under the Curve (AUC) |       |       |          |         |       | IV-Ghrelin or Placebo |        |  |  |  |  |
|                           |       |            |                 |            |            |      |          |         | p                                       | q       | d     | d     | d     | d     | Baseline              | IV-ASA | BrAC=0  | p       | q     | d     | d                          | d     | d     | Baseline | Post-LD | IV-AC | Post-AC               | BrAC=0 |  |  |  |  |
| HILICpos_740.4625_0.63    | HILIC | pos        | 0.63            | 740.4625   |            |      | 4        |         | 0.29940                                 | 0.62914 | -0.29 | -0.02 | 0.53  | -0.44 | -0.01                 | 0.37   | 0.10444 | 0.58038 | -0.27 | -0.34 | -0.02                      | -0.59 | 0.05  | 0.14     | -0.66   |       |                       |        |  |  |  |  |
| RPpos_740.4655_5.84       | RP    | pos        | 5.84            | 740.4655   |            |      | 4        |         | 0.32081                                 | 0.64736 | -0.26 | 0.30  | 0.78  | -0.36 | -0.45                 | 0.42   | 0.00793 | 0.18888 | -0.33 | -0.34 | -0.18                      | -0.40 | -0.03 | 0.10     | -0.69   |       |                       |        |  |  |  |  |
| HILICneg_740.4954_0.92    | HILIC | neg        | 0.92            | 740.4954   |            |      | 4        |         | 0.00008                                 | 0.01663 | -0.41 | -0.22 | -0.21 | -0.75 | -0.17                 | 0.61   | 0.04794 | 0.43735 | -0.38 | -0.16 | -0.18                      | -0.78 | -0.15 | -0.17    | -0.81   |       |                       |        |  |  |  |  |
| HILICpos_740.5208_0.73    | HILIC | pos        | 0.73            | 740.5208   |            |      | 4        |         | 0.88413                                 | 0.95710 | 0.05  | 0.87  | 0.02  | -0.07 | 0.52                  | -0.23  | 0.38564 | 0.84978 | -0.24 | -0.32 | -0.08                      | -0.06 | 0.21  | -0.37    | -0.77   |       |                       |        |  |  |  |  |
| RPpos_740.5213_12.84      | RP    | pos        | 12.84           | 740.5213   |            |      | 4        |         | 0.88550                                 | 0.82164 | 0.16  | 0.44  | 0.96  | 0.06  | 0.29                  | 0.01   | 0.46472 | 0.6723  | -0.17 | -0.19 | -0.09                      | -0.13 | -0.05 | -0.12    | -0.51   |       |                       |        |  |  |  |  |
| RPneg_740.5217_13.222     | RP    | neg        | 13.222          | 740.5217   |            |      | 4        |         | 0.78557                                 | 0.91523 | -0.16 | 0.17  | -0.42 | 0.17  | -0.14                 | -0.02  | 0.65734 | 0.94101 | -0.09 | -0.25 | -0.15                      | 0.51  | 0.54  | 0.58     | -0.64   |       |                       |        |  |  |  |  |
| RPpos_740.7006_12.35      | RP    | pos        | 12.35           | 740.7006   |            |      | 4        |         | 0.76440                                 | 0.90719 | 0.03  | 0.01  | 0.77  | -0.23 | 0.00                  | 0.65   | 0.58673 | 0.92538 | -0.21 | -0.09 | -0.09                      | -0.03 | -0.12 | -0.75    | -0.25   |       |                       |        |  |  |  |  |
| RPpos_740.8956_10.5       | RP    | pos        | 10.5            | 740.8956   |            |      | 4        |         | 0.99721                                 | 0.99894 | -0.02 | -0.27 | 0.81  | -0.09 | 0.12                  | 0.81   | 0.17792 | 0.69252 | -0.29 | -0.31 | -0.10                      | -0.27 | -0.07 | -0.49    | -0.32   |       |                       |        |  |  |  |  |
| HILICpos_741.364_5.39     | HILIC | pos        | 5.39            | 741.3640   |            |      | 4        |         | 0.69332                                 | 0.87408 | -0.05 | 0.09  | 0.53  | -0.02 | -0.06                 | -0.32  | 0.01537 | 0.26501 | 0.42  | 0.37  | 1.11                       | 0.27  | 0.89  | 0.28     | -0.82   |       |                       |        |  |  |  |  |
| HILICpos_741.5292_0.85    | HILIC | pos        | 0.85            | 741.5292   |            |      | 4        |         | 0.44597                                 | 0.74156 | -0.14 | 1.19  | -0.08 | -0.29 | 0.08                  | -0.08  | 0.51258 | 0.90638 | -0.13 | 0.31  | -0.07                      | -0.10 | -0.15 | 0.08     | -0.53   |       |                       |        |  |  |  |  |
| RPpos_741.856_11.24       | RP    | pos        | 11.24           | 741.8560   |            |      | 4        |         | 0.77655                                 | 0.91211 | -0.07 | 0.09  | 0.62  | -0.05 | -0.21                 | 0.35   | 0.61735 | 0.93244 | -0.18 | -0.26 | 0.01                       | -0.14 | 0.16  | -0.52    | -0.32   |       |                       |        |  |  |  |  |
| RPneg_742.29028_10.228    | RP    | neg        | 10.228          | 742.2903   |            |      | 4        |         | 0.03155                                 | 0.29799 | -0.42 | -0.24 | -0.40 | -0.66 | 0.19                  | -0.65  | 0.10935 | 0.58989 | -0.14 | 0.23  | -0.03                      | -0.53 | -0.05 | 0.13     | -0.41   |       |                       |        |  |  |  |  |
| RPpos_742.3047_5.25       | RP    | pos        | 5.25            | 742.3047   |            |      | 4        |         | 0.00363                                 | 0.12288 | -0.54 | 0.11  | -0.36 | -0.92 | -0.35                 | 0.37   | 0.34061 | 0.82618 | 0.22  | 0.22  | -0.17                      | 0.00  | -0.08 | 1.18     | 0.72    |       |                       |        |  |  |  |  |
| HILICpos_742.3981_0.38    | HILIC | pos        | 0.38            | 742.3981   |            |      | 4        |         | 0.27684                                 | 0.61158 | -0.36 | 0.17  | 0.36  | -0.16 | -0.52                 | 0.22   | 0.67935 | 0.94725 | -0.59 | 0.18  | 0.54                       | -0.45 | -0.01 | -0.36    | -0.90   |       |                       |        |  |  |  |  |
| RPneg_742.53741_13.781    | RP    | neg        | 13.781          | 742.5374   |            |      | 4        |         | 0.97244                                 | 0.98979 | -0.05 | 0.10  | 0.41  | -0.11 | -0.02                 | 0.09   | 0.03590 | 0.38709 | -0.14 | -0.05 | -0.11                      | -0.05 | 0.12  | -0.35    | -0.30   |       |                       |        |  |  |  |  |
| RPpos_742.5376_13.15      | RP    | pos        | 13.15           | 742.5376   |            |      | 4        |         | 0.45917                                 | 0.75050 | 0.15  | 0.30  | 0.60  | 0.30  | 0.14                  | -0.12  | 0.00833 | 0.19515 | -0.33 | -0.38 | -0.14                      | -0.16 | -0.30 | -0.31    | -0.38   |       |                       |        |  |  |  |  |
| RPneg_742.53815_13.906    | RP    | neg        | 13.906          | 742.5382   |            |      | 4        |         | 0.91043                                 | 0.96860 | 0.04  | -0.08 | 0.36  | 0.22  | 0.01                  | 0.02   | 0.02790 | 0.34917 | -0.37 | 0.08  | -0.11                      | -0.10 | -0.40 | -0.52    | -0.60   |       |                       |        |  |  |  |  |
| HILICneg_742.5406_0.68    | HILIC | neg        | 0.68            | 742.5406   |            |      | 4        |         | 0.96985                                 | 0.98857 | -0.01 | 0.59  | 0.37  | 0.11  | 0.00                  | -0.26  | 0.18446 | 0.70014 | -0.34 | -0.26 | 0.05                       | 0.04  | -0.24 | -0.47    | -0.79   |       |                       |        |  |  |  |  |
| HILICpos_742.5739_0.59    | HILIC | pos        | 0.59            | 742.5739   |            |      | 4        |         | 0.97086                                 | 0.98887 | -0.11 | 0.19  | 0.96  | 0.06  | 0.27                  | 0.00   | 0.10203 | 0.57547 | 0.58  | 0.60  | 0.79                       | 0.48  | 0.59  | 0.64     | 0.09    |       |                       |        |  |  |  |  |
| HILICneg_743.20148_11.761 | HILIC | neg        | 11.761          | 743.2015   |            |      | 4        |         | 0.46649                                 | 0.75510 | 0.40  | 0.53  | 0.03  | 0.37  | 0.77                  | 0.06   | 0.02190 | 0.1281  | 0.84  | 0.64  | 0.91                       | 0.48  | 0.77  | 0.58     | 0.15    |       |                       |        |  |  |  |  |
| HILICneg_743.3475_0.52    | HILIC | neg        | 0.52            | 743.3475   |            |      | 4        |         | 0.15569                                 | 0.49832 | -0.21 | 0.15  | 0.61  | -0.09 | -0.66                 | 0.44   | 0.97206 | 0.99673 | -0.02 | -0.14 | -0.04                      | 0.01  | 0.31  | -0.15    | -0.36   |       |                       |        |  |  |  |  |
| HILICneg_743.9409_5.41    | HILIC | neg        | 5.41            | 743.9409   |            |      | 4        |         | 0.17346                                 | 0.51891 | 0.38  | 0.52  | 0.62  | 0.13  | 0.52                  | 0.72   | 0.60485 | 0.92903 | -0.02 | -0.17 | 0.05                       | 0.18  | 0.20  | 0.06     | -0.88   |       |                       |        |  |  |  |  |
| RPneg_744.30536_10.393    | RP    | neg        | 10.393          | 744.3054   |            |      | 4        |         | 0.00743                                 | 0.16927 | -0.29 | -0.15 | -0.13 | -0.18 | 0.27                  | -0.34  | 0.57100 | 0.92157 | 0.29  | 0.35  | 0.45                       | 0.09  | 0.25  | 0.45     | -0.04   |       |                       |        |  |  |  |  |
| RPpos_744.378_12.03       | RP    | pos        | 12.03           | 744.3780   |            |      | 4        |         | 0.40551                                 | 0.71224 | 0.19  | -0.04 | 0.74  | 0.11  | 0.30                  | 0.43   | 0.70680 | 0.95248 | -0.16 | -0.16 | -0.15                      | -0.06 | 0.39  | -0.61    | -0.26   |       |                       |        |  |  |  |  |
| RPpos_744.4064_11.31      | RP    | pos        | 11.31           | 744.4064   |            |      | 4        |         | 0.98027                                 | 0.99237 | -0.02 | -0.15 | 0.62  | -0.09 | -0.05                 | 0.61   | 0.88080 | 0.98281 | -0.08 | 0.07  | -0.09                      | -0.42 | 0.28  | -0.21    | -0.01   |       |                       |        |  |  |  |  |
| HILICpos_744.5529_0.61    | HILIC | pos        | 0.61            | 744.5529   |            |      | 4        |         | 0.29167                                 | 0.62426 | -0.23 | -0.11 | -0.21 | -0.15 | 0.09                  | 0.26   | 0.51337 | 0.90648 | -0.13 | -0.22 | 0.03                       | -0.16 | -0.12 | -0.09    | -0.21   |       |                       |        |  |  |  |  |
| RPpos_744.5553_13.81      | RP    | pos        | 13.81           | 744.5553   |            |      | 4        |         | 0.69059                                 | 0.87279 | 0.09  | 0.44  | 0.46  | 0.19  | 0.07                  | -0.14  | 0.61035 | 0.93036 | -0.26 | 0.24  | 0.07                       | 0.16  | -0.34 | -0.36    | -0.47   |       |                       |        |  |  |  |  |
| RPneg_744.56458_12.501    | RP    | neg        | 12.501          | 744.5646   |            |      | 4        |         | 0.25705                                 | 0.59521 | -0.22 | 0.61  | -0.29 | -0.36 | 0.13                  | 0.00   | 0.31541 | 0.81238 | -0.20 | 0.23  | -0.26                      | 0.30  | -0.12 | -0.06    | -0.28   |       |                       |        |  |  |  |  |
| RPpos_744.7135_12.03      | RP    | pos        | 12.03           | 744.7135   |            |      | 4        |         | 0.61174                                 | 0.83397 | 0.13  | -0.16 | 0.71  | -0.02 | 0.22                  | 0.64   | 0.90019 | 0.98550 | -0.10 | -0.09 | -0.14                      | 0.01  | 0.37  | -0.53    | -0.16   |       |                       |        |  |  |  |  |
| RPpos_744.8376_11.08      | RP    | pos        | 11.08           | 744.8376   |            |      | 4        |         | 0.78728                                 | 0.91650 | -0.11 | 0.13  | -0.09 | -0.20 | 0.69                  | 0.59   | 0.29117 | 0.79560 | 0.35  | 0.29  | -0.17                      | 0.65  | 0.47  | -0.28    | 0.14    |       |                       |        |  |  |  |  |
| RPpos_744.9032_10.78      | RP    | pos        | 10.78           | 744.9032   |            |      | 4        |         | 0.16081                                 | 0.50418 | -0.30 | -0.45 | 0.59  | -0.52 | -0.16                 | 0.51   | 0.64331 | 0.93738 | -0.15 | -0.13 | 0.00                       | -0.14 | 0.26  | -0.54    | -0.19   |       |                       |        |  |  |  |  |
| RPpos_745.0459_12.03      | RP    | pos        | 12.03           | 745.0459   |            |      | 4        |         | 0.47257                                 | 0.75963 | 0.18  | -0.14 | 0.86  | 0.13  | 0.19                  | 0.45   | 0.67822 | 0.94718 | -0.17 | -0.17 | -0.07                      | -0.05 | 0.26  | -0.63    | -0.24   |       |                       |        |  |  |  |  |
| RPpos_745.3787_12.03      | RP    | pos        | 12.03           | 745.3787   |            |      | 4        |         | 0.56270                                 | 0.81056 | 0.14  | -0.18 | 0.79  | 0.01  | 0.15                  | 0.66   | 0.63409 | 0.93546 | -0.18 | -0.13 | -0.03                      | -0.14 | -0.02 | -0.54    | -0.32   |       |                       |        |  |  |  |  |
| RPpos_745.385_6.71        | RP    | pos        | 6.71            | 745.3850   |            |      | 4        |         | 0.49310                                 | 0.77902 | -0.21 | -0.19 | 1.10  | -0.35 | 0.56                  | 0.57   | 0.56598 | 0.92078 | 0.10  | 0.33  | 0.40                       | -0.01 | -0.13 | -0.18    | 0.26    |       |                       |        |  |  |  |  |
| RPpos_745.4171_5.84       | RP    | pos        | 5.84            | 745.4171   |            |      | 4        |         | 0.27573                                 | 0.61083 | -0.30 | 0.08  | 1.03  | -0.42 | -0.55                 | 0.72   | 0.43896 | 0.87776 | -0.19 | -0.29 | 0.17                       | -0.01 | -0.37 | -0.08    | -0.37   |       |                       |        |  |  |  |  |
| RPpos_745.4375_10.17      | RP    | pos        | 10.17           | 745.4375   |            |      | 4        |         | 0.33746                                 | 0.66047 | 0.17  | 0.37  | 0.54  | 0.22  | 0.19                  | 0.33   | 0.21905 | 0.73554 | -0.14 | -0.18 | -0.03                      | -0.20 | 0.09  | -0.27    | -0.21   |       |                       |        |  |  |  |  |
| RPpos_745.5159_10.62      | RP    | pos        | 10.62           | 745.5159   |            |      | 4        |         | 0.62640                                 | 0.84168 | 0.18  | 0.05  | 0.40  | 0.24  | 0.25                  | 0.63   | 0.91575 | 0.98777 | -0.09 | 0.16  | -0.29                      | 0.33  | 0.27  | -0.66    | 0.59    |       |                       |        |  |  |  |  |
| HILICneg_745.5483_0.91    | HILIC | neg        | 0.91            | 745.5483   |            |      | 4        |         | 0.15336                                 | 0.49636 | -0.46 | 0.26  | -0.32 | -0.78 | 0.43                  | -0.11  | 0.86298 | 0.97989 | -0.07 | -0.21 | 0.13                       | -0.03 | 0.08  | -0.12    | -0.25   |       |                       |        |  |  |  |  |
| HILICneg_745.5492_0.97    | HILIC | neg        | 0.97            | 745.5492   |            |      | 4        |         | 0.17335                                 | 0.51891 | -0.36 | 0.24  | -0.07 | -0.36 | 0.44                  | -0.35  | 0.80720 | 0.97036 | -0.08 | -0.16 | 0.08                       | 0.29  | -0.09 | -0.17    | -0.32   |       |                       |        |  |  |  |  |
| HILICpos_746.3979_0.43    | HILIC | pos        | 0.43            | 746.3979   |            |      | 4        |         | 0.46324                                 | 0.75281 | -0.22 | -0.26 | 0.67  | -0.22 | -0.26                 | 0.22   | 0.57746 | 0.92307 | -0.17 | -0.13 | -0.15                      | -0.24 | 0.37  | -0.46    | -0.26   |       |                       |        |  |  |  |  |
| RPpos_746.4033_11.01      | RP    | pos        | 11.01           | 746.4033   |            |      | 4        |         | 0.78940                                 | 0.91761 | -0.11 | -0.31 | 1.21  | -0.02 | -0.32                 | 0.46   | 0.54408 | 0.91525 | -0.21 | -0.28 | -0.01                      | -0.19 | -0.06 | -0.35    | -0.34   |       |                       |        |  |  |  |  |
| RPneg_746.49878_12.029    | RP    | neg        | 12.029          | 746.4988   |            |      | 4        |         | 0.94012                                 | 0.97816 | -0.03 | 0.32  | 0.13  | -0.19 | 0.29                  | 0.59   | 0.74646 | 0.96075 | 0.04  | -0.22 | -0.07                      | 0.03  | 0.28  | 0.03     | 0.23    |       |                       |        |  |  |  |  |
| RPneg_746.51459_13.184    | RP    | neg        | 13.184          | 746.5146   |            |      | 4        |         | 0.66442                                 | 0.85962 | -0.19 | 0.71  | -0.23 | -0.12 | 0.00                  | -0.17  | 0.72480 | 0.95590 | 0.19  | -0.11 | -0.23                      | 3.48  | 2.15  | 0.35     | -0.43   |       |                       |        |  |  |  |  |
| HILICneg_746.5152_0.64    | HILIC | neg        | 0.64            | 746.5152   |            |      | 4        |         | 0.24712                                 | 0.58731 | -0.32 | 0.03  | -0.07 | -0.42 | -0.01                 | -0.44  | 0.64641 | 0.93850 | 0.31  | 0.26  | 0.55                       | 0.36  | 0.63  | 0.11     | -0.38   |       |                       |        |  |  |  |  |
| RPpos_746.5698_13.22      | RP    | pos        | 13.22           | 746.5698   |            |      | 4        |         | 0.46790                                 | 0.75613 | -0.09 | 0.24  | 0.20  | -0.47 | 0.40                  | 0.10   | 0.73485 | 0.84361 | -0.29 | -0.19 | -0.29                      | -0.23 | -0.29 | -0.26    | -0.42   |       |                       |        |  |  |  |  |
| RPpos_747.3613_11.72      | RP    | pos        | 11.72           | 747.3613   |            |      | 4        |         | 0.47518                                 | 0.76088 | 0.08  | -0.10 | 0.64  | 0.01  | 0.15                  | 0.66   | 0.31456 | 0.81205 | -0.21 | -0.16 | -0.34                      | -0.21 | 0.08  | -0.54    | -0.36   |       |                       |        |  |  |  |  |
| RPpos_747.406_13.42       | RP    | pos        | 13.42           | 747.4060   |            |      | 4        |         | 0.70846                                 | 0.88092 | -0.10 | 0.07  | 0.04  | 0.43  | 0.15                  | 0.25   | 0.89493 | 0.98465 | -0.07 | 0.41  | -0.26                      | 0.29  | -0.03 | 0.17     | 0.06    |       |                       |        |  |  |  |  |
| HILICneg_747.5656_0.9     | HILIC | neg        | 0.9             | 747.5656   |            |      | 4        |         | 0.94518                                 | 0.97998 | -0.05 | 0.66  | -0.11 | -0.40 | 0.58                  | 0.16   | 0.03382 | 0.37707 | -0.27 | -0.09 | -0.14                      | -0.41 | -0.22 | -0.12    | -0.29   |       |                       |        |  |  |  |  |
| HILICneg_747.5657_0.96    | HILIC | neg        | 0.96            | 747.5657   |            |      | 4        |         | 0.23895                                 | 0.58060 | -0.28 | 1.33  | -0.33 | -0.50 | 0.32                  | 0.04   | 0.07210 | 0.51254 | -0.29 | 0.14  | -0.                        |       |       |          |         |       |                       |        |  |  |  |  |









| Feature_ID             | Mode  | Ionization | Average_Rt.min. | Average_Mz | Metabolite | MSMS | ID_Level | HMDB_ID | IV-Alcohol self-administration (IV-ASA) |         |       |       |       |                       |       |       |         |         | IV-Alcohol clamp (IV-AC)   |       |       |       |       |                       |       |   |   |   |
|------------------------|-------|------------|-----------------|------------|------------|------|----------|---------|-----------------------------------------|---------|-------|-------|-------|-----------------------|-------|-------|---------|---------|----------------------------|-------|-------|-------|-------|-----------------------|-------|---|---|---|
|                        |       |            |                 |            |            |      |          |         | Area Under the Curve (AUC)              |         |       |       |       | IV-Ghrelin or Placebo |       |       |         |         | Area Under the Curve (AUC) |       |       |       |       | IV-Ghrelin or Placebo |       |   |   |   |
|                        |       |            |                 |            |            |      |          |         | p                                       | q       | d     | d     | d     | d                     | d     | d     | d       | d       | p                          | q     | d     | d     | d     | d                     | d     | d | d | d |
| HILICneg_804.1764_0.36 | HILIC | neg        | 0.36            | 804.1764   |            |      | 4        |         | 0.69997                                 | 0.87732 | -0.14 | 0.70  | -0.23 | 0.43                  | 0.13  | -0.10 | 0.17501 | 0.68961 | -0.39                      | -0.58 | 0.23  | -0.31 | 0.14  | -0.23                 | -0.03 |   |   |   |
| RPneg_804.54041_10.125 | RP    | neg        | 10.125          | 804.5404   |            |      | 4        |         | 0.03608                                 | 0.31074 | -0.44 | -0.06 | 0.07  | -0.46                 | 0.07  | -0.23 | 0.70705 | 0.95248 | -0.21                      | 0.06  | -0.40 | 0.81  | -0.25 | -0.20                 | -0.04 |   |   |   |
| RPpos_805.0281_10.87   | RP    | pos        | 10.87           | 805.0281   |            |      | 4        |         | 0.03151                                 | 0.29799 | -0.41 | -0.04 | -0.16 | -0.38                 | -0.26 | -0.40 | 0.47098 | 0.89070 | -0.11                      | 0.64  | 0.13  | -0.01 | 0.13  | 0.01                  | -0.09 |   |   |   |
| RPpos_805.0536_12.64   | RP    | pos        | 12.64           | 805.0536   |            |      | 4        |         | 0.00955                                 | 0.83320 | -0.05 | -0.05 | 0.23  | 0.05                  | 0.17  | -0.38 | 0.57141 | 0.92183 | -0.19                      | -0.46 | -0.15 | -0.51 | 0.40  | -0.02                 | -0.08 |   |   |   |
| RPpos_805.4223_11.21   | RP    | pos        | 11.21           | 805.4223   |            |      | 4        |         | 0.34246                                 | 0.73275 | -0.21 | -0.36 | 0.39  | -0.01                 | -0.41 | 0.66  | 0.71017 | 0.93780 | -0.14                      | -0.24 | 0.54  | -0.16 | 0.26  | -0.44                 | -0.20 |   |   |   |
| RPpos_805.5281_12.755  | RP    | pos        | 12.755          | 805.5281   |            |      | 4        |         | 0.31737                                 | 0.64943 | -0.28 | 0.66  | -0.27 | -0.54                 | 0.04  | -0.13 | 0.81484 | 0.93780 | -0.03                      | 0.37  | 0.50  | -0.25 | 0.48  | -0.18                 | -0.57 |   |   |   |
| HILICpos_805.6229_0.75 | HILIC | pos        | 0.75            | 805.6229   |            |      | 4        |         | 0.43180                                 | 0.73132 | 0.14  | 0.27  | 0.27  | -0.15                 | 0.63  | 0.03  | 0.19864 | 0.71460 | 0.37                       | 0.49  | 0.24  | 0.03  | 0.69  | 0.55                  | -0.27 |   |   |   |
| RPpos_806.3859_11.96   | RP    | pos        | 11.96           | 806.3859   |            |      | 4        |         | 0.64362                                 | 0.84910 | 0.07  | -0.09 | 0.73  | -0.07                 | 0.13  | 0.22  | 0.87091 | 0.98085 | -0.13                      | -0.28 | -0.07 | -0.01 | 0.24  | -0.54                 | -0.27 |   |   |   |
| RPneg_806.49609_12.99  | RP    | neg        | 12.99           | 806.4961   |            |      | 4        |         | 0.25393                                 | 0.59219 | 0.92  | -0.42 | 0.66  | 1.90                  | 0.71  | 0.90  | 0.49562 | 0.90014 | 0.10                       | 0.47  | -0.33 | 0.45  | 1.07  | -0.20                 | -0.38 |   |   |   |
| HILICpos_806.5449_0.41 | HILIC | pos        | 0.41            | 806.5449   |            |      | 4        |         | 0.41548                                 | 0.71988 | -0.12 | 0.09  | 0.14  | 0.14                  | -0.03 | 0.27  | 0.43546 | 0.87634 | -0.34                      | -0.14 | 0.19  | 0.26  | -0.41 | -0.53                 | 0.29  |   |   |   |
| HILICpos_806.5685_0.58 | HILIC | pos        | 0.58            | 806.5685   |            |      | 4        |         | 0.12129                                 | 0.45664 | -0.40 | -0.02 | -0.15 | -0.09                 | -0.30 | -0.10 | 0.07957 | 0.52909 | -0.33                      | -0.57 | -0.25 | -0.36 | -0.46 | -0.28                 | -0.19 |   |   |   |
| HILICneg_808.5479_0.59 | HILIC | neg        | 0.59            | 808.5479   |            |      | 4        |         | 0.36747                                 | 0.68420 | -0.24 | 0.04  | -0.12 | -0.28                 | -0.16 | -0.21 | 0.95593 | 0.99446 | -0.03                      | -0.03 | 0.04  | 0.03  | 0.23  | -0.11                 | -0.19 |   |   |   |
| RPpos_809.0648_12.6    | RP    | pos        | 12.6            | 809.0648   |            |      | 4        |         | 0.69684                                 | 0.87590 | 0.06  | -0.16 | 0.48  | -0.11                 | 0.13  | 0.48  | 0.85208 | 0.97768 | -0.10                      | -0.04 | -0.06 | -0.01 | 0.03  | -0.44                 | -0.25 |   |   |   |
| RPpos_809.4863_10.55   | RP    | pos        | 10.55           | 809.4863   |            |      | 4        |         | 0.04430                                 | 0.33379 | -0.30 | -0.26 | -0.08 | -0.27                 | 0.05  | -0.35 | 0.64459 | 0.93797 | 0.15                       | -0.03 | 0.25  | 0.23  | 0.17  | 0.10                  | 0.18  |   |   |   |
| HILICpos_809.5578_7.08 | HILIC | pos        | 7.08            | 809.5578   |            |      | 4        |         | 0.63446                                 | 0.84497 | 0.15  | 0.49  | 0.79  | -0.12                 | -0.13 | -0.74 | 0.01371 | 0.24969 | 0.76                       | 0.35  | 1.28  | 2.15  | 0.54  | 0.11                  | -0.22 |   |   |   |
| HILICpos_809.6509_0.84 | HILIC | pos        | 0.84            | 809.6509   |            |      | 4        |         | 0.95108                                 | 0.98191 | 0.04  | 0.86  | -0.13 | -0.13                 | 0.45  | 0.02  | 0.12174 | 0.60974 | -0.56                      | -0.36 | 0.35  | -0.46 | -0.17 | -0.92                 | -0.75 |   |   |   |
| RPneg_810.52954_12.392 | RP    | neg        | 12.392          | 810.5295   |            |      | 4        |         | 0.11974                                 | 0.45552 | -0.40 | -0.37 | -0.01 | -0.58                 | 0.26  | -0.09 | 0.91976 | 0.98860 | -0.02                      | -0.37 | 0.68  | -0.29 | 0.11  | -0.05                 | 0.00  |   |   |   |
| RPneg_810.5625_13.091  | RP    | neg        | 13.091          | 810.5625   |            |      | 4        |         | 0.27421                                 | 0.50955 | 0.53  | 0.38  | 0.35  | 0.64                  | 1.06  | 0.02  | 0.82354 | 0.97342 | -0.06                      | -0.39 | 0.08  | -0.15 | -0.08 | 0.41                  | -0.17 |   |   |   |
| RPneg_810.5683_13.087  | RP    | neg        | 13.087          | 810.5683   |            |      | 4        |         | 0.68087                                 | 0.86745 | 0.12  | 0.14  | 0.06  | 0.18                  | 0.40  | -0.07 | 0.60094 | 0.92810 | -0.15                      | -0.01 | 0.54  | -0.07 | -0.06 | -0.29                 | -0.29 |   |   |   |
| RPpos_810.6003_13.56   | RP    | pos        | 13.56           | 810.6003   |            |      | 4        |         | 0.56047                                 | 0.80943 | -0.14 | 1.06  | 0.09  | -0.45                 | 0.18  | -0.01 | 0.71048 | 0.95280 | 0.14                       | -0.19 | -0.26 | 1.45  | 0.58  | -0.19                 | -0.34 |   |   |   |
| RPpos_810.6021_13.44   | RP    | pos        | 13.44           | 810.6021   |            |      | 4        |         | 0.44618                                 | 0.74176 | -0.18 | 0.25  | 0.15  | -0.14                 | -0.16 | 0.20  | 0.27827 | 0.78746 | -0.28                      | 0.23  | -0.27 | -0.06 | -0.43 | -0.25                 | -0.29 |   |   |   |
| RPpos_810.6022_14.09   | RP    | pos        | 14.09           | 810.6022   |            |      | 4        |         | 0.09184                                 | 0.42060 | -0.24 | 0.52  | -0.04 | -0.32                 | -0.09 | -0.12 | 0.50516 | 0.90356 | -0.14                      | 0.08  | 0.04  | 0.07  | -0.08 | -0.33                 | -0.28 |   |   |   |
| RPneg_811.45557_5.961  | RP    | neg        | 5.961           | 811.4556   |            |      | 4        |         | 0.29283                                 | 0.62497 | -0.33 | 0.68  | 0.53  | -0.37                 | -0.25 | 0.53  | 0.21472 | 0.73123 | -0.26                      | -0.50 | 0.10  | -0.25 | -0.26 | 0.18                  | -0.36 |   |   |   |
| RPneg_811.46509_10.004 | RP    | neg        | 10.004          | 811.4651   |            |      | 4        |         | 0.12217                                 | 0.45754 | -0.01 | 0.02  | 0.03  | 0.05                  | 0.08  | -0.04 | 0.97334 | 0.99690 | 0.12                       | 0.11  | 0.10  | 0.15  | 0.01  | 0.18                  | 0.15  |   |   |   |
| HILICpos_812.4008_5.52 | HILIC | pos        | 5.52            | 812.4008   |            |      | 4        |         | 0.17885                                 | 0.52425 | 0.34  | -0.03 | 0.89  | 0.53                  | 0.40  | -0.02 | 0.02162 | 0.31075 | 0.62                       | 0.33  | 0.89  | 0.45  | 1.47  | -0.11                 | 0.02  |   |   |   |
| RPpos_812.4379_10.99   | RP    | pos        | 10.99           | 812.4379   |            |      | 4        |         | 0.91344                                 | 0.96817 | -0.03 | -0.40 | 1.04  | -0.01                 | 0.00  | 0.38  | 0.51238 | 0.90634 | -0.19                      | -0.16 | -0.23 | -0.01 | -0.08 | -0.33                 | -0.06 |   |   |   |
| HILICpos_812.4387_0.44 | HILIC | pos        | 0.44            | 812.4387   |            |      | 4        |         | 0.68820                                 | 0.87144 | -0.14 | -0.33 | 0.79  | -0.12                 | -0.21 | 0.33  | 0.77498 | 0.96469 | -0.10                      | -0.20 | 0.15  | -0.18 | 0.17  | -0.09                 | -0.53 |   |   |   |
| RPpos_812.5029_7.49    | RP    | pos        | 7.49            | 812.5029   |            |      | 4        |         | 0.71473                                 | 0.88396 | 0.06  | 0.02  | 0.69  | 0.32                  | 0.07  | 0.49  | 0.33246 | 0.82228 | -0.35                      | -0.27 | 0.17  | 0.12  | -0.15 | -0.47                 | -0.36 |   |   |   |
| RPpos_812.5104_10.87   | RP    | pos        | 10.87           | 812.5104   |            |      | 4        |         | 0.02676                                 | 0.28244 | -0.38 | 0.01  | 0.13  | -0.44                 | -0.43 | -0.41 | 0.26556 | 0.77769 | -0.06                      | 0.26  | -0.16 | -0.15 | 0.36  | -0.19                 | -0.22 |   |   |   |
| RPpos_812.5565_13.14   | RP    | pos        | 13.14           | 812.5565   |            |      | 4        |         | 0.54528                                 | 0.80095 | -0.21 | 0.12  | -0.25 | -0.24                 | 0.12  | -0.31 | 0.28951 | 0.79452 | -0.29                      | -0.22 | 0.53  | -0.27 | -0.56 | -0.27                 | -0.11 |   |   |   |
| RPneg_812.5798_13.575  | RP    | neg        | 13.575          | 812.5798   |            |      | 4        |         | 0.18365                                 | 0.52989 | -0.22 | 0.08  | -0.39 | -0.12                 | 0.13  | -0.60 | 0.24956 | 0.76578 | -0.23                      | -0.18 | -0.15 | -0.36 | 0.33  | -0.27                 | 0.10  |   |   |   |
| HILICpos_812.6118_0.58 | HILIC | pos        | 0.58            | 812.6118   |            |      | 4        |         | 0.07858                                 | 0.40137 | -0.28 | 0.39  | 0.02  | -0.38                 | 0.02  | 0.13  | 0.58115 | 0.92438 | -0.05                      | 0.10  | 0.04  | 0.10  | 0.07  | -0.21                 | -0.40 |   |   |   |
| HILICpos_813.331_4.98  | HILIC | pos        | 4.98            | 813.331    |            |      | 4        |         | 0.16323                                 | 0.50807 | 0.61  | 0.34  | 0.15  | 0.34                  | 0.80  | 0.06  | 0.10813 | 0.58714 | 0.39                       | -0.01 | 0.66  | 0.79  | 0.06  | 0.20                  | -0.35 |   |   |   |
| RPpos_813.4014_11.68   | RP    | pos        | 11.68           | 813.4014   |            |      | 4        |         | 0.36216                                 | 0.68042 | -0.19 | -0.35 | 0.40  | -0.42                 | -0.17 | 0.45  | 0.87614 | 0.98219 | -0.14                      | 0.07  | 0.10  | 0.20  | 0.05  | 1.11                  | -0.10 |   |   |   |
| RPpos_813.4106_12.26   | RP    | pos        | 12.26           | 813.4106   |            |      | 4        |         | 0.73838                                 | 0.89446 | 0.07  | 0.25  | 0.81  | -0.17                 | -0.01 | 0.33  | 0.70637 | 0.95248 | -0.15                      | -0.13 | -0.13 | -0.20 | 0.33  | -0.37                 | -0.28 |   |   |   |
| RPpos_813.7466_12.26   | RP    | pos        | 12.26           | 813.7466   |            |      | 4        |         | 0.71615                                 | 0.88449 | 0.07  | -0.16 | 0.62  | 0.03                  | -0.03 | 0.48  | 0.38380 | 0.84921 | -0.26                      | -0.22 | -0.35 | -0.12 | 0.01  | -0.66                 | -0.01 |   |   |   |
| RPpos_816.4218_7.45    | RP    | pos        | 7.45            | 816.4218   |            |      | 4        |         | 0.34374                                 | 0.66510 | -0.40 | 0.17  | 0.29  | -0.09                 | 0.55  | 0.11  | 0.66341 | 0.94294 | -0.15                      | 0.87  | 0.03  | -0.14 | -0.15 | -0.39                 | -0.75 |   |   |   |
| RPneg_816.51654_13.449 | RP    | neg        | 13.449          | 816.5165   |            |      | 4        |         | 0.89222                                 | 0.96086 | -0.15 | 0.23  | 0.02  | 0.07                  | -0.02 | -1.04 | 0.07362 | 0.51614 | 0.82                       | 1.50  | 0.32  | 0.90  | 1.53  | -0.03                 | 0.59  |   |   |   |
| RPpos_817.0094_10.87   | RP    | pos        | 10.87           | 817.0094   |            |      | 4        |         | 0.07046                                 | 0.38506 | -0.27 | -0.07 | -0.06 | 0.00                  | -0.56 | -0.18 | 0.71408 | 0.95354 | 0.15                       | 0.18  | 0.04  | 0.57  | 0.15  | 0.18                  | -0.26 |   |   |   |
| HILICpos_817.0413_5.32 | HILIC | pos        | 5.32            | 817.0413   |            |      | 4        |         | 0.19081                                 | 0.53656 | 0.41  | 0.54  | 0.62  | 0.14                  | 0.57  | 0.59  | 0.15499 | 0.66110 | 0.09                       | 0.07  | 0.09  | -0.13 | 0.24  | 0.55                  | -0.51 |   |   |   |
| RPneg_817.58996_12.74  | RP    | neg        | 12.74           | 817.5899   |            |      | 4        |         | 0.38556                                 | 0.69803 | -0.27 | 0.35  | -0.34 | -0.28                 | 0.09  | 0.47  | 0.01531 | 0.26427 | -0.88                      | -0.49 | -0.69 | -1.50 | -0.72 | -0.43                 | -0.80 |   |   |   |
| RPpos_817.5994_12.87   | RP    | pos        | 12.87           | 817.5994   |            |      | 4        |         | 0.32806                                 | 0.65275 | -0.24 | 0.13  | 0.05  | -1.05                 | 0.32  | -0.24 | 0.92743 | 0.98936 | 0.05                       | 0.15  | -0.06 | -0.09 | 0.16  | 0.26                  | -0.22 |   |   |   |
| RPpos_818.0919_11.96   | RP    | pos        | 11.96           | 818.0919   |            |      | 4        |         | 0.87030                                 | 0.95134 | 0.03  | -0.14 | 0.55  | -0.02                 | -0.09 | 1.11  | 0.52601 | 0.91004 | -0.23                      | -0.23 | 0.12  | -0.27 | 0.12  | -0.84                 | -0.42 |   |   |   |
| RPneg_818.5451_13.275  | RP    | neg        | 13.275          | 818.5451   |            |      | 4        |         | 0.33118                                 | 0.65528 | -0.29 | 1.38  | -0.02 | -0.22                 | -0.27 | -0.53 | 0.58504 | 0.92503 | -0.13                      | 1.60  | -0.09 | 0.51  | -0.21 | -0.13                 | -0.54 |   |   |   |
| RPneg_818.55298_12.336 | RP    | neg        | 12.336          | 818.5530   |            |      | 4        |         | 0.093124                                | 0.29741 | -0.57 | 0.16  | -0.37 | -0.65                 | -0.24 | -0.58 | 0.18713 | 0.70221 | 0.53                       | 0.72  | -0.26 | 0.34  | 1.00  | 0.52                  | 0.29  |   |   |   |
| RPneg_818.58997_10.576 | RP    | neg        | 10.576          | 818.5900   |            |      | 4        |         | 0.62992                                 | 0.84348 | -0.21 | 0.28  | 0.06  | -0.12                 | 0.76  | 0.50  | 0.90415 | 0.98415 | -0.58                      | 0.15  | 0.66  | 0.74  | 0.36  | 0.70                  | -0.16 |   |   |   |
| RPpos_818.9239_11.2    | RP    | pos        | 11.2            | 818.9239   |            |      | 4        |         | 0.48783                                 | 0.78988 | -0.38 | 0.38  | 0.25  | -0.34                 | 0.22  | 0.68  | 0.53388 | 0.91321 | -0.20                      | 0.22  | -0.23 | 0.01  | 0.39  | -0.56                 | -0.21 |   |   |   |
| HILICpos_819.3721_5.2  | HILIC | pos        | 5.2             | 819.3721   |            |      | 4        |         | 0.71475                                 | 0.88396 | 0.10  | 0.07  | 0.37  | 0.64                  | 0.10  | -0.27 | 0.12187 | 0.60974 | 0.70                       | 0.93  | 0.63  | 0.82  | 1.13  | 0.17                  | 0.10  |   |   |   |
| RPpos_819.4578_10.76   | RP    | pos        | 10.76           | 819.4578   |            |      | 4        |         | 0.72911                                 | 0.88963 | -0.11 | -0.54 | 1.02  | -0.01                 | -0.12 | 0.49  | 0.48398 | 0.89667 | -0.22                      | -0.19 | -0.02 |       |       |                       |       |   |   |   |

| Feature_ID             | Mode  | Ionization | Average_Rt.min. | Average_Mz | Metabolite | MSMS | ID_Level | HMDB_ID | IV-Alcohol self-administration (IV-ASA) |         |        |       |        |                       |       |                       |         |         | IV-Alcohol clamp (IV-AC) |       |         |       |                       |                            |       |   |         |   |                       |   |   |  |  |
|------------------------|-------|------------|-----------------|------------|------------|------|----------|---------|-----------------------------------------|---------|--------|-------|--------|-----------------------|-------|-----------------------|---------|---------|--------------------------|-------|---------|-------|-----------------------|----------------------------|-------|---|---------|---|-----------------------|---|---|--|--|
|                        |       |            |                 |            |            |      |          |         | Area Under the Curve (AUC)              |         |        |       |        | IV-Ghrelin or Placebo |       |                       |         |         | IV-Ghrelin or Placebo    |       |         |       |                       | Area Under the Curve (AUC) |       |   |         |   | IV-Ghrelin or Placebo |   |   |  |  |
|                        |       |            |                 |            |            |      |          |         | Baseline                                |         | IV-ASA |       | BRAC=0 | Baseline              |       | IV-Ghrelin or Placebo |         | BRAC=0  | Baseline                 |       | Post-LD |       | IV-Ghrelin or Placebo |                            | IV-AC |   | Post-AC |   | BRAC=0                |   |   |  |  |
|                        |       |            |                 |            |            |      |          |         | p                                       | q       | d      | d     | d      | d                     | d     | d                     | d       | d       | d                        | p     | q       | d     | d                     | d                          | d     | d | d       | d | d                     | d | d |  |  |
| RPpos_832.5808_13.76   | RP    | pos        | 13.76           | 832.5808   |            |      | 4        |         | 0.15775                                 | 0.50087 | -0.41  | -0.12 | 0.37   | -0.34                 | -0.21 | 0.17                  | 0.28695 | 0.79369 | -0.59                    | 0.46  | 0.36    | -1.23 | -0.62                 | -0.59                      | 0.42  |   |         |   |                       |   |   |  |  |
| RPpos_832.5862_12.99   | RP    | pos        | 12.99           | 832.5862   |            |      | 4        |         | 0.03626                                 | 0.31110 | -0.44  | 0.48  | -0.37  | -0.58                 | -0.10 | -0.33                 | 0.03570 | 0.38620 | -0.41                    | -0.69 | -0.21   | -0.37 | 0.04                  | -0.71                      | -0.21 |   |         |   |                       |   |   |  |  |
| RPneg_833.29187_8.777  | RP    | neg        | 8.777           | 833.2919   |            |      | 4        |         | 0.49368                                 | 0.77316 | -0.10  | -0.12 | -0.11  | -0.23                 | 0.30  | -0.06                 | 0.07139 | 0.51098 | 0.22                     | -0.13 | 0.33    | 0.18  | 0.09                  | 0.57                       | -0.05 |   |         |   |                       |   |   |  |  |
| RPpos_834.3652_5.65    | RP    | pos        | 5.65            | 834.3652   |            |      | 4        |         | 0.04612                                 | 0.33734 | -0.47  | -0.35 | -0.44  | 0.12                  | -0.65 | -0.72                 | 0.07440 | 0.51712 | -0.40                    | 0.14  | -0.22   | -0.44 | -0.63                 | -0.85                      | 0.40  |   |         |   |                       |   |   |  |  |
| RPpos_834.4528_10.99   | RP    | pos        | 10.99           | 834.4528   |            |      | 4        |         | 0.95127                                 | 0.98202 | -0.44  | -0.23 | 0.96   | 0.03                  | -0.14 | 0.43                  | 0.61835 | 0.93255 | -0.16                    | -0.13 | 0.03    | -0.15 | -0.19                 | -0.54                      | -0.07 |   |         |   |                       |   |   |  |  |
| RPneg_834.4531_0.44    | HILIC | pos        | 0.44            | 834.4531   |            |      | 4        |         | 0.58470                                 | 0.97832 | 0.03   | 0.25  | 1.34   | 0.02                  | -0.62 | 0.55                  | 0.65390 | 0.84001 | -0.16                    | -0.11 | -0.08   | -0.24 | 0.01                  | -0.34                      | -0.38 |   |         |   |                       |   |   |  |  |
| HILICneg_834.5657_0.58 | HILIC | neg        | 0.58            | 834.5657   |            |      | 4        |         | 0.35497                                 | 0.67425 | -0.31  | -0.12 | 0.02   | -0.41                 | 0.01  | -0.08                 | 0.92533 | 0.98905 | 0.08                     | 0.12  | 0.30    | 0.08  | 0.14                  | 0.10                       | -0.24 |   |         |   |                       |   |   |  |  |
| RPneg_834.59827_10.842 | RP    | neg        | 10.842          | 834.5983   |            |      | 4        |         | 0.26224                                 | 0.59983 | 0.11   | 0.03  | -0.17  | -0.31                 | 1.37  | -0.26                 | 0.61677 | 0.93222 | -0.04                    | -0.36 | 0.28    | -0.08 | -0.05                 | 0.08                       | -0.06 |   |         |   |                       |   |   |  |  |
| RPpos_835.4141_11.66   | RP    | pos        | 11.66           | 835.4141   |            |      | 4        |         | 0.97032                                 | 0.98871 | -0.01  | -0.38 | 0.25   | 0.06                  | 0.03  | 0.57                  | 0.49341 | 0.89856 | -0.38                    | -0.09 | -0.18   | -0.11 | -0.27                 | -1.19                      | -0.26 |   |         |   |                       |   |   |  |  |
| HILICpos_835.4156_0.41 | HILIC | pos        | 0.41            | 835.4156   |            |      | 4        |         | 0.86549                                 | 0.94973 | 0.00   | -0.18 | 0.53   | -0.03                 | 0.01  | 0.44                  | 0.57197 | 0.92217 | -0.21                    | -0.13 | -0.28   | -0.12 | 0.27                  | -0.55                      | -0.30 |   |         |   |                       |   |   |  |  |
| RPpos_838.4183_12.56   | RP    | pos        | 12.56           | 838.4183   |            |      | 4        |         | 0.38059                                 | 0.69486 | 0.12   | -0.17 | 0.37   | 0.06                  | 0.00  | 1.29                  | 0.62214 | 0.93343 | -0.17                    | 0.00  | -0.05   | -0.04 | -0.01                 | -0.83                      | -0.04 |   |         |   |                       |   |   |  |  |
| RPneg_838.55945_12.859 | RP    | neg        | 12.859          | 838.5595   |            |      | 4        |         | 0.54594                                 | 0.80131 | -0.22  | 0.05  | 0.22   | -0.16                 | -0.35 | 0.00                  | 0.60031 | 0.92810 | 0.27                     | -0.46 | 0.19    | 0.33  | 0.56                  | 0.11                       | -0.29 |   |         |   |                       |   |   |  |  |
| HILICpos_838.8353_4.3  | HILIC | pos        | 4.3             | 838.8353   |            |      | 4        |         | 0.06241                                 | 0.36949 | -0.60  | -0.16 | 0.29   | -0.59                 | -0.22 | -0.21                 | 0.59009 | 0.92655 | -0.11                    | 0.09  | -0.63   | 0.18  | -0.79                 | 0.12                       | 0.14  |   |         |   |                       |   |   |  |  |
| RPneg_840.53033_12.711 | RP    | neg        | 12.711          | 840.5303   |            |      | 4        |         | 0.03464                                 | 0.30556 | -0.63  | 0.32  | -0.22  | -0.33                 | -0.28 | -0.56                 | 0.12123 | 0.60896 | 0.44                     | -0.16 | 0.43    | 0.70  | 0.64                  | -0.02                      | -0.20 |   |         |   |                       |   |   |  |  |
| HILICneg_840.6102_0.59 | HILIC | neg        | 0.59            | 840.6102   |            |      | 4        |         | 0.34198                                 | 0.66388 | -0.26  | 0.25  | -0.02  | -0.46                 | 0.25  | -0.33                 | 0.59418 | 0.92734 | 0.21                     | 0.28  | 0.15    | 0.24  | 0.24                  | 0.16                       | -0.34 |   |         |   |                       |   |   |  |  |
| RPpos_841.4707_10.76   | RP    | pos        | 10.76           | 841.4707   |            |      | 4        |         | 0.64398                                 | 0.84924 | -0.14  | -0.24 | 1.07   | -0.20                 | -0.16 | 0.43                  | 0.45799 | 0.88460 | -0.22                    | -0.14 | -0.05   | -0.25 | 0.11                  | -0.59                      | -0.33 |   |         |   |                       |   |   |  |  |
| HILICpos_841.4707_0.46 | HILIC | pos        | 0.46            | 841.4707   |            |      | 4        |         | 0.88077                                 | 0.95574 | 0.00   | -0.12 | 1.20   | 0.12                  | -0.11 | 0.46                  | 0.64774 | 0.93906 | -0.15                    | -0.26 | -0.08   | 0.00  | 0.03                  | -0.43                      | -0.20 |   |         |   |                       |   |   |  |  |
| RPneg_841.5694_12.898  | RP    | neg        | 12.898          | 841.5694   |            |      | 4        |         | 0.38826                                 | 0.70200 | -0.17  | 0.18  | 0.00   | -0.02                 | 0.10  | -0.64                 | 0.74318 | 0.96035 | 0.03                     | -0.06 | 0.41    | -0.20 | 0.12                  | -0.24                      | -0.08 |   |         |   |                       |   |   |  |  |
| RPpos_842.4315_11.42   | RP    | pos        | 11.42           | 842.4315   |            |      | 4        |         | 0.86829                                 | 0.95065 | 0.01   | -0.11 | 0.62   | 0.02                  | -0.10 | 0.50                  | 0.75863 | 0.96233 | -0.13                    | 0.10  | 0.00    | -0.11 | 0.19                  | -0.61                      | -0.13 |   |         |   |                       |   |   |  |  |
| RPpos_842.4611_10.22   | RP    | pos        | 10.22           | 842.4611   |            |      | 4        |         | 0.02542                                 | 0.27880 | -0.31  | 0.10  | -0.23  | 0.06                  | 0.15  | -0.56                 | 0.83610 | 0.97570 | 0.08                     | 1.06  | 0.17    | 0.02  | 0.18                  | 0.19                       | -0.27 |   |         |   |                       |   |   |  |  |
| HILICpos_842.6058_0.56 | HILIC | pos        | 0.56            | 842.6058   |            |      | 4        |         | 0.31596                                 | 0.64337 | -0.30  | -0.12 | -0.07  | 0.46                  | 0.05  | -0.19                 | 0.60629 | 0.92920 | -0.11                    | -0.40 | 0.10    | -0.14 | -0.08                 | 0.01                       | -0.06 |   |         |   |                       |   |   |  |  |
| RPpos_843.3953_12.25   | RP    | pos        | 12.25           | 843.3953   |            |      | 4        |         | 0.55622                                 | 0.80750 | -0.16  | -0.20 | 0.45   | -0.35                 | -0.11 | 0.61                  | 0.62262 | 0.93343 | -0.20                    | -0.04 | -0.21   | -0.22 | 0.13                  | -0.42                      | -0.27 |   |         |   |                       |   |   |  |  |
| RPneg_844.56415_13.859 | RP    | neg        | 13.859          | 844.5642   |            |      | 4        |         | 0.38132                                 | 0.69515 | -0.34  | 0.38  | 0.02   | -0.70                 | 0.52  | -0.63                 | 0.55949 | 0.91988 | 0.18                     | 0.48  | -0.26   | 0.08  | 0.75                  | -0.19                      | 1.16  |   |         |   |                       |   |   |  |  |
| RPpos_845.4066_11.42   | RP    | pos        | 11.42           | 845.4066   |            |      | 4        |         | 0.70196                                 | 0.87832 | -0.12  | -0.47 | 0.41   | -0.34                 | 0.36  | 0.43                  | 0.98241 | 0.99752 | -0.03                    | 0.09  | -0.15   | 0.03  | 0.45                  | -0.57                      | -0.17 |   |         |   |                       |   |   |  |  |
| HILICneg_847.5192_0.92 | HILIC | neg        | 0.92            | 847.5192   |            |      | 4        |         | 0.00102                                 | 0.06451 | -0.63  | 0.04  | -0.17  | -0.70                 | -0.75 | -0.52                 | 0.58529 | 0.92503 | -0.36                    | 1.01  | -0.09   | -0.29 | -0.56                 | -0.23                      | -0.57 |   |         |   |                       |   |   |  |  |
| HILICneg_848.5408_0.6  | HILIC | neg        | 0.6             | 848.5408   |            |      | 4        |         | 0.41181                                 | 0.71682 | -0.19  | -0.05 | 0.63   | -0.15                 | -0.25 | -0.20                 | 0.95183 | 0.99379 | 0.04                     | -0.29 | 0.26    | 0.43  | 0.26                  | -0.28                      | -0.03 |   |         |   |                       |   |   |  |  |
| RPneg_848.54669_12.395 | RP    | neg        | 12.395          | 848.5467   |            |      | 4        |         | 0.79842                                 | 0.92217 | 0.07   | 0.28  | 0.22   | 0.02                  | 0.29  | -0.09                 | 0.40568 | 0.86018 | 0.35                     | -0.02 | -0.09   | 0.77  | 0.57                  | 0.30                       | 0.04  |   |         |   |                       |   |   |  |  |
| RPneg_848.54669_12.487 | RP    | neg        | 12.487          | 848.5467   |            |      | 4        |         | 0.76625                                 | 0.90843 | -0.12  | 0.28  | 0.27   | -0.25                 | -0.08 | 0.37                  | 0.81394 | 0.97171 | -0.09                    | -0.39 | 0.01    | 0.57  | -0.25                 | -0.19                      | -0.29 |   |         |   |                       |   |   |  |  |
| RPneg_849.11841_9.746  | RP    | neg        | 9.746           | 849.1184   |            |      | 4        |         | 0.57692                                 | 0.81658 | -0.10  | 0.57  | -0.07  | -0.72                 | 0.68  | 0.72                  | 0.97635 | 0.99711 | 0.00                     | -0.40 | 0.22    | 0.01  | 0.20                  | -0.08                      | -0.16 |   |         |   |                       |   |   |  |  |
| RPneg_849.49133_12.195 | RP    | neg        | 12.195          | 849.4913   |            |      | 4        |         | 0.96084                                 | 0.98615 | -0.07  | 0.31  | -0.01  | -0.08                 | 0.00  | 0.08                  | 0.18426 | 0.70014 | -0.28                    | -0.25 | -0.35   | -0.29 | -0.30                 | 0.06                       | 0.07  |   |         |   |                       |   |   |  |  |
| HILICneg_849.5333_0.92 | HILIC | neg        | 0.92            | 849.5333   |            |      | 4        |         | 0.00407                                 | 0.13050 | -0.48  | -0.08 | -0.20  | -0.43                 | -0.51 | -0.30                 | 0.15867 | 0.66716 | -0.36                    | -0.38 | -0.34   | -0.07 | -0.07                 | -0.48                      | -0.69 |   |         |   |                       |   |   |  |  |
| RPpos_850.4109_11.93   | RP    | pos        | 11.93           | 850.4109   |            |      | 4        |         | 0.96498                                 | 0.98767 | -0.01  | -0.26 | 0.75   | 0.02                  | -0.09 | 0.55                  | 0.23522 | 0.73301 | -0.49                    | 0.05  | -0.23   | -0.32 | 0.06                  | -1.77                      | -0.29 |   |         |   |                       |   |   |  |  |
| HILICneg_850.5613_0.16 | HILIC | neg        | 0.16            | 850.5613   |            |      | 4        |         | 0.02909                                 | 0.38012 | -0.51  | -0.06 | -0.39  | -0.42                 | -0.15 | -0.37                 | 0.08992 | 0.55360 | -0.57                    | 0.83  | -0.35   | -0.14 | 0.33                  | -0.61                      | -0.56 |   |         |   |                       |   |   |  |  |
| RPpos_854.5646_0.56    | HILIC | pos        | 0.56            | 854.5646   |            |      | 4        |         | 0.26246                                 | 0.59966 | -0.26  | 0.10  | 0.14   | -0.33                 | -0.10 | -0.46                 | 0.47121 | 0.89083 | 0.06                     | 0.15  | 0.13    | 0.18  | 0.13                  | 0.17                       | 0.04  |   |         |   |                       |   |   |  |  |
| RPpos_854.5659_13      | RP    | pos        | 13              | 854.5659   |            |      | 4        |         | 0.70229                                 | 0.87844 | -0.18  | 0.06  | -0.12  | -0.24                 | 0.05  | -0.61                 | 0.26284 | 0.77537 | 0.41                     | -0.09 | 1.79    | 0.45  | 0.29                  | -0.42                      | -0.01 |   |         |   |                       |   |   |  |  |
| RPneg_854.58887_13.669 | RP    | neg        | 13.669          | 854.5889   |            |      | 4        |         | 0.25230                                 | 0.59105 | -0.16  | 0.05  | 0.04   | -0.17                 | 0.09  | 0.05                  | 0.47466 | 0.89269 | -0.27                    | 0.17  | -0.37   | -0.21 | -0.12                 | -0.34                      | -0.11 |   |         |   |                       |   |   |  |  |
| RPneg_854.58942_13.862 | RP    | neg        | 13.862          | 854.5894   |            |      | 4        |         | 0.35103                                 | 0.67130 | -0.22  | 0.38  | 0.02   | -0.26                 | 0.12  | -0.82                 | 0.73466 | 0.95858 | 0.20                     | 1.32  | -0.29   | 0.18  | 0.28                  | -0.21                      | 0.73  |   |         |   |                       |   |   |  |  |
| RPneg_855.47894_6.081  | RP    | neg        | 6.081           | 855.4789   |            |      | 4        |         | 0.15843                                 | 0.50161 | -0.30  | 0.04  | 0.50   | -0.09                 | -0.32 | -0.48                 | 0.20446 | 0.72067 | -0.41                    | 0.04  | -0.27   | -0.92 | -0.46                 | -0.10                      | -0.56 |   |         |   |                       |   |   |  |  |
| HILICpos_856.4641_0.45 | HILIC | pos        | 0.45            | 856.4641   |            |      | 4        |         | 0.76612                                 | 0.90836 | -0.10  | -0.27 | 1.06   | -0.08                 | -0.09 | 0.40                  | 0.31619 | 0.81258 | -0.39                    | -0.19 | -0.18   | -0.35 | -0.51                 | -0.51                      | -0.65 |   |         |   |                       |   |   |  |  |
| RPpos_856.4642_10.98   | RP    | pos        | 10.98           | 856.4642   |            |      | 4        |         | 0.34768                                 | 0.66831 | -0.26  | -0.19 | 0.43   | -0.32                 | -0.36 | -0.34                 | 0.68087 | 0.94778 | -0.21                    | 0.06  | 0.11    | -0.11 | -0.42                 | -0.91                      | -0.13 |   |         |   |                       |   |   |  |  |
| HILICpos_856.5298_0.51 | HILIC | pos        | 0.51            | 856.5298   |            |      | 4        |         | 0.52323                                 | 0.78939 | -0.22  | -0.15 | 1.07   | -0.32                 | -0.29 | 0.69                  | 0.31500 | 0.81229 | -0.30                    | -0.26 | -0.06   | -0.39 | 0.06                  | -0.17                      | -0.45 |   |         |   |                       |   |   |  |  |
| RPpos_856.5333_7.55    | RP    | pos        | 7.55            | 856.5333   |            |      | 4        |         | 0.38363                                 | 0.69682 | -0.25  | 0.21  | 1.97   | -0.68                 | 0.02  | 0.48                  | 0.38683 | 0.85033 | -0.36                    | -0.06 | 0.14    | -0.55 | 0.09                  | -0.17                      | -0.50 |   |         |   |                       |   |   |  |  |
| RPpos_857.4271_11.65   | RP    | pos        | 11.65           | 857.4271   |            |      | 4        |         | 0.74291                                 | 0.89720 | 0.05   | -0.15 | 0.73   | -0.01                 | 0.04  | 0.47                  | 0.63375 | 0.93546 | -0.18                    | -0.04 | -0.23   | -0.15 | 0.10                  | -0.50                      | -0.18 |   |         |   |                       |   |   |  |  |
| HILICpos_857.4280_0.41 | HILIC | pos        | 0.41            | 857.4280   |            |      | 4        |         | 0.61836                                 | 0.83790 | 0.10   | -0.28 | 0.86   | 0.12                  | 0.12  | 0.39                  | 0.77021 | 0.96458 | 0.11                     | 0.22  | 0.05    | 0.00  | 0.35                  | -0.30                      | -0.07 |   |         |   |                       |   |   |  |  |
| RPpos_858.3912_12.59   | RP    | pos        | 12.59           | 858.3912   |            |      | 4        |         | 0.84821                                 | 0.94327 | -0.07  | -0.13 | 0.50   | -0.11                 | -0.04 | -0.13                 | 0.07383 | 0.51671 | -0.59                    | -0.09 | -0.50   | -0.30 | 0.12                  | 0.96                       | -0.71 |   |         |   |                       |   |   |  |  |
| HILICneg_858.613_0.16  | HILIC | neg        | 0.16            | 858.6130   |            |      | 4        |         | 0.04804                                 | 0.34179 | -0.52  | 0.13  | -0.36  | -0.72                 | 0.10  | -0.27                 | 0.16345 | 0.67417 | -0.36                    | -0.09 | -0.17   | -0.13 | -0.17                 | -0.39                      | -0.81 |   |         |   |                       |   |   |  |  |
| HILICpos_860.6107_0.57 | HILIC | pos        | 0.57            | 860.6107   |            |      | 4        |         | 0.24453                                 | 0.58541 | -0.18  | 0.23  | 0.15   | -0.34                 | 0.15  | -0.02                 | 0.73119 | 0.95784 | -0.46                    | -0.06 | 0.08    | 0.09  | 0.11                  | -0.08                      | -0.34 |   |         |   |                       |   |   |  |  |
| RPpos_860.6671_11.73   | RP    | pos        | 11.73           | 860.6671   |            |      | 4        |         | 0.70246                                 | 0.87845 | -0.12  | -0.09 | 0.09   | 0.25                  | -0.11 | -0.21                 | 0.14896 | 0.65278 | -0.26                    | -0.52 | -0.50   | -0.15 | -0.09                 | -0.04                      | 0.03  |   |         |   |                       |   |   |  |  |
| HILICneg_862.5945_0.58 | HILIC | neg        | 0.58            | 862.59     |            |      |          |         |                                         |         |        |       |        |                       |       |                       |         |         |                          |       |         |       |                       |                            |       |   |         |   |                       |   |   |  |  |



| Feature_ID             | Mode  | Ionization | Average_Rt.min. | Average_Mz | Metabolite | MSMS | ID_Level | HMDB_ID | IV-Alcohol self-administration (IV-ASA) |         |       |       |       |                       |       |       |         |         | IV-Alcohol clamp (IV-AC)   |       |       |       |       |                       |       |   |   |   |
|------------------------|-------|------------|-----------------|------------|------------|------|----------|---------|-----------------------------------------|---------|-------|-------|-------|-----------------------|-------|-------|---------|---------|----------------------------|-------|-------|-------|-------|-----------------------|-------|---|---|---|
|                        |       |            |                 |            |            |      |          |         | Area Under the Curve (AUC)              |         |       |       |       | IV-Ghrelin or Placebo |       |       |         |         | Area Under the Curve (AUC) |       |       |       |       | IV-Ghrelin or Placebo |       |   |   |   |
|                        |       |            |                 |            |            |      |          |         | Baseline                                |         |       |       |       | BrAC=0                |       |       |         |         | Baseline                   |       |       |       |       | Post-AC               |       |   |   |   |
|                        |       |            |                 |            |            |      |          |         | p                                       | q       | d     | d     | d     | d                     | d     | d     | d       | d       | p                          | q     | d     | d     | d     | d                     | d     | d | d | d |
| RPneg_883.54187_12.754 | RP    | neg        | 12.754          | 883.5419   |            |      | 4        |         | 0.42217                                 | 0.72467 | -0.34 | -0.01 | -1.19 | 0.18                  | 0.45  | -0.58 | 0.78650 | 0.96713 | 0.02                       | 0.14  | -0.04 | -0.07 | -0.16 | 0.29                  | -0.06 |   |   |   |
| HILICpos_885.4931_0.47 | HILIC | pos        | 0.47            | 885.4931   |            |      | 4        |         | 0.95070                                 | 0.98167 | -0.03 | -0.15 | 0.24  | 0.36                  | -0.20 | 0.45  | 0.16651 | 0.67772 | -0.47                      | -0.46 | -0.27 | -0.54 | -0.38 | -0.63                 | -0.37 |   |   |   |
| RPpos_885.4932_10.75   | RP    | pos        | 10.75           | 885.4932   |            |      | 4        |         | 0.67705                                 | 0.86597 | -0.12 | -0.35 | 0.40  | -0.08                 | -0.24 | 0.65  | 0.59512 | 0.92751 | -0.37                      | -0.06 | 0.10  | -0.43 | -0.21 | -0.80                 | -0.40 |   |   |   |
| HILICneg_886.2239_0.48 | HILIC | neg        | 0.48            | 886.2239   |            |      | 4        |         | 0.08885                                 | 0.41681 | -0.44 | 0.36  | 0.54  | 0.37                  | 0.39  | 0.86  | 0.16585 | 0.67711 | -0.57                      | -0.58 | -0.57 | -0.61 | -0.57 | -0.50                 | -0.42 |   |   |   |
| RPpos_886.4566_11.4    | RP    | pos        | 11.4            | 886.4566   |            |      | 4        |         | 0.58494                                 | 0.82130 | -0.04 | -0.28 | 0.24  | -0.33                 | -0.03 | 0.76  | 0.76495 | 0.14329 | -0.18                      | -0.01 | -0.41 | 0.17  | -0.16 | -0.98                 | -0.12 |   |   |   |
| RPpos_892.4202_12.2    | RP    | pos        | 12.2            | 892.4202   |            |      | 4        |         | 0.79238                                 | 0.91903 | 0.04  | 0.01  | 0.67  | 0.08                  | 0.00  | 0.29  | 0.51011 | 0.90515 | -0.24                      | -0.16 | 0.13  | -0.25 | 0.21  | -0.77                 | -0.06 |   |   |   |
| RPpos_892.5154_10.48   | RP    | pos        | 10.48           | 892.5154   |            |      | 4        |         | 0.60496                                 | 0.83167 | 0.08  | -0.37 | 0.86  | 0.06                  | 0.08  | 0.79  | 0.12194 | 0.60991 | -0.24                      | 0.00  | -0.27 | -0.44 | -0.20 | 0.05                  | -0.35 |   |   |   |
| RPneg_892.53082_12.675 | RP    | neg        | 12.675          | 892.5308   |            |      | 4        |         | 0.61168                                 | 0.83397 | -0.11 | 0.14  | 0.38  | -0.18                 | -0.09 | 0.23  | 0.69341 | 0.95008 | -0.10                      | -0.39 | -0.04 | 0.20  | -0.05 | 0.03                  | -0.23 |   |   |   |
| RPneg_892.53168_12.564 | RP    | neg        | 12.564          | 892.5317   |            |      | 4        |         | 0.67452                                 | 0.86434 | -0.09 | 0.36  | 0.59  | -0.17                 | 0.10  | -0.54 | 0.72527 | 0.95608 | 0.09                       | -0.19 | -0.14 | -0.12 | 0.98  | -0.13                 | 0.32  |   |   |   |
| RPneg_893.19202_9.55   | RP    | neg        | 9.55            | 893.1920   |            |      | 4        |         | 0.16955                                 | 0.51416 | -0.42 | -0.17 | -0.18 | 0.32                  | 0.14  | -0.25 | 0.98410 | 0.99770 | 0.01                       | 0.00  | 0.30  | -0.27 | -0.01 | -0.12                 | 0.25  |   |   |   |
| RPpos_893.4764_11.18   | RP    | pos        | 11.18           | 893.4764   |            |      | 4        |         | 0.84741                                 | 0.94292 | 0.02  | -0.31 | 0.77  | 0.02                  | 0.19  | 0.53  | 0.78863 | 0.96713 | -0.10                      | -0.14 | 0.06  | -0.17 | 0.09  | -0.42                 | -0.13 |   |   |   |
| RPneg_893.47998_12.308 | RP    | neg        | 12.308          | 893.4800   |            |      | 4        |         | 0.09126                                 | 0.42003 | -0.23 | 0.37  | -0.18 | -0.35                 | 0.32  | 0.10  | 0.65602 | 0.94038 | 0.18                       | 0.05  | 0.18  | 0.06  | 0.47  | 0.04                  | -0.17 |   |   |   |
| RPpos_894.439_11.89    | RP    | pos        | 11.89           | 894.4390   |            |      | 4        |         | 0.87659                                 | 0.95377 | 0.03  | -0.15 | 0.53  | 0.05                  | -0.04 | 0.41  | 0.20175 | 0.71758 | -0.31                      | -0.45 | -0.54 | 0.32  | 0.14  | -0.93                 | -0.32 |   |   |   |
| RPneg_894.54993_12.801 | RP    | neg        | 12.801          | 894.5499   |            |      | 4        |         | 0.33965                                 | 0.66217 | -0.34 | -0.08 | -0.14 | -0.05                 | 0.10  | -0.70 | 0.50432 | 0.90327 | 0.09                       | 0.27  | 0.03  | 0.08  | 0.13  | -0.07                 | 0.33  |   |   |   |
| RPneg_894.5827_10.878  | RP    | neg        | 10.878          | 894.5827   |            |      | 4        |         | 0.23396                                 | 0.57555 | 0.53  | 0.55  | -0.12 | 0.22                  | 1.35  | 0.24  | 0.56871 | 0.92109 | -0.25                      | -1.05 | -0.28 | -0.30 | -0.18 | 0.38                  | 0.38  |   |   |   |
| RPneg_895.44067_13.186 | RP    | neg        | 13.186          | 895.4407   |            |      | 4        |         | 0.14405                                 | 0.48463 | -0.47 | 0.81  | -0.46 | -0.50                 | 0.14  | -0.49 | 0.30480 | 0.80494 | -0.27                      | -0.07 | -0.36 | -0.12 | 0.03  | -0.36                 | -0.38 |   |   |   |
| RPneg_895.63434_10.914 | RP    | neg        | 10.914          | 895.6343   |            |      | 4        |         | 0.00147                                 | 0.07759 | 1.29  | -0.04 | 0.35  | 1.00                  | 2.25  | -0.57 | 0.42077 | 0.86863 | -0.20                      | -0.21 | 0.27  | -0.42 | -0.03 | -0.26                 | -0.17 |   |   |   |
| RPneg_897.62048_9.322  | RP    | neg        | 9.322           | 897.6205   |            |      | 4        |         | 0.05342                                 | 0.35293 | 0.17  | -0.07 | 0.12  | 0.10                  | 1.00  | 2.01  | 0.41519 | 0.86524 | 0.52                       | -0.21 | 0.49  | 0.60  | 0.69  | 1.27                  | -0.44 |   |   |   |
| RPneg_897.62095_9.174  | RP    | neg        | 9.174           | 897.6209   |            |      | 4        |         | 0.01040                                 | 0.19377 | 0.69  | 0.05  | 0.76  | 1.01                  | 1.88  | 1.28  | 0.00915 | 0.20313 | -0.33                      | -0.10 | 0.46  | 0.17  | -0.01 | -0.02                 | -0.38 |   |   |   |
| RPneg_898.55695_12.538 | RP    | neg        | 12.538          | 898.5570   |            |      | 4        |         | 0.36317                                 | 0.68113 | -0.44 | -0.03 | -0.24 | -0.47                 | -0.40 | 0.33  | 0.51473 | 0.90650 | 0.34                       | 0.18  | 0.34  | 0.48  | 0.39  | 0.02                  | 0.16  |   |   |   |
| HILICneg_898.5581_0.58 | HILIC | neg        | 0.58            | 898.5581   |            |      | 4        |         | 0.17616                                 | 0.52162 | -0.26 | 0.06  | 0.33  | -0.05                 | -0.41 | -0.72 | 0.45280 | 0.88300 | 0.24                       | 0.29  | 0.69  | 0.19  | 0.25  | -0.03                 | -0.11 |   |   |   |
| RPneg_898.57861_13.998 | RP    | neg        | 13.998          | 898.5786   |            |      | 4        |         | 0.76644                                 | 0.90851 | 0.11  | 0.65  | -0.09 | -0.13                 | 0.78  | 0.28  | 0.96554 | 0.99645 | -0.02                      | 0.07  | 0.02  | -0.02 | -0.12 | -0.15                 | 0.15  |   |   |   |
| RPneg_899.51819_10.003 | RP    | neg        | 10.003          | 899.5182   |            |      | 4        |         | 0.94633                                 | 0.98034 | 0.02  | -0.03 | 0.08  | 0.02                  | 0.12  | 0.14  | 0.48184 | 0.89522 | 0.23                       | 0.25  | 0.26  | 0.26  | 0.18  | 0.25                  | 0.14  |   |   |   |
| RPpos_899.6326_9.17    | RP    | pos        | 9.17            | 899.6326   |            |      | 4        |         | 0.04057                                 | 0.32205 | 0.64  | 0.03  | 0.70  | 0.92                  | 1.54  | 1.94  | 0.06178 | 0.48428 | 0.16                       | -0.27 | 0.10  | 0.93  | 0.15  | -0.03                 | -0.38 |   |   |   |
| RPpos_900.4905_10.97   | RP    | pos        | 10.97           | 900.4905   |            |      | 4        |         | 0.86872                                 | 0.95080 | -0.06 | -0.27 | 0.86  | 0.05                  | -0.16 | 0.40  | 0.52586 | 0.91004 | -0.18                      | -0.17 | -0.09 | -0.18 | 0.13  | -0.48                 | -0.12 |   |   |   |
| HILICpos_900.5552_0.52 | HILIC | pos        | 0.52            | 900.5552   |            |      | 4        |         | 0.49912                                 | 0.77597 | -0.23 | -0.13 | 0.89  | -0.17                 | -0.36 | 0.37  | 0.42327 | 0.87004 | -0.25                      | -0.29 | -0.10 | -0.24 | 0.18  | -0.10                 | -0.54 |   |   |   |
| HILICpos_900.6790_0.55 | HILIC | pos        | 0.55            | 900.6790   |            |      | 4        |         | 0.48925                                 | 0.77067 | -0.18 | 1.20  | 0.19  | -0.56                 | 0.26  | -0.32 | 0.79802 | 0.96921 | -0.01                      | 0.02  | 0.40  | -0.01 | 0.24  | -0.38                 | -0.43 |   |   |   |
| RPpos_901.4529_11.63   | RP    | pos        | 11.63           | 901.4529   |            |      | 4        |         | 0.58762                                 | 0.82282 | -0.13 | -0.31 | 0.43  | -0.27                 | -0.14 | 0.69  | 0.62489 | 0.93385 | -0.27                      | -0.21 | -0.13 | -0.10 | -0.39 | -0.72                 | -0.17 |   |   |   |
| HILICpos_901.454_0.42  | HILIC | pos        | 0.42            | 901.4540   |            |      | 4        |         | 0.78084                                 | 0.91422 | 0.01  | -0.02 | 0.51  | 0.00                  | 0.03  | 0.77  | 0.57067 | 0.92145 | -0.26                      | -0.20 | -0.26 | 0.01  | 0.14  | -0.67                 | -0.18 |   |   |   |
| RPneg_901.6806_11.193  | RP    | neg        | 11.193          | 901.6806   |            |      | 4        |         | 0.00060                                 | 0.04712 | 2.15  | 0.02  | 0.65  | 1.56                  | 4.35  | -0.14 | 0.94209 | 0.99162 | -0.07                      | -0.16 | 0.11  | -0.11 | -0.10 | -0.12                 | 0.03  |   |   |   |
| RPneg_904.59857_11.936 | RP    | neg        | 11.936          | 904.5986   |            |      | 4        |         | 0.24092                                 | 0.58195 | -0.26 | 0.60  | -0.20 | -0.34                 | -0.04 | 0.00  | 0.56041 | 0.91988 | -0.34                      | 1.09  | -0.30 | -0.35 | -0.30 | -0.32                 | -0.69 |   |   |   |
| HILICpos_905.4805_6.22 | HILIC | pos        | 6.22            | 905.4805   |            |      | 4        |         | 0.29188                                 | 0.62456 | -0.12 | -0.04 | 0.13  | -0.14                 | -0.12 | 0.08  | 0.16264 | 0.67267 | 0.56                       | 0.06  | 0.33  | 1.09  | 0.59  | 1.38                  | -0.15 |   |   |   |
| HILICpos_906.8251_1.3  | HILIC | pos        | 1.3             | 906.8251   |            |      | 4        |         | 0.13752                                 | 0.47749 | -0.44 | -0.03 | -0.06 | 0.00                  | -0.24 | -0.06 | 0.89725 | 0.98504 | -0.08                      | -0.33 | 0.12  | -0.59 | 0.13  | -0.92                 | -0.31 |   |   |   |
| RPpos_907.5096_10.74   | RP    | pos        | 10.74           | 907.5096   |            |      | 4        |         | 0.97622                                 | 0.99080 | -0.03 | -0.30 | 0.85  | 0.02                  | -0.23 | 0.94  | 0.98349 | 0.99758 | -0.03                      | -0.11 | 0.06  | 0.02  | 0.41  | -0.24                 | -0.41 |   |   |   |
| HILICpos_907.5101_0.47 | HILIC | pos        | 0.47            | 907.5101   |            |      | 4        |         | 0.93639                                 | 0.97709 | -0.06 | -0.01 | 0.81  | 0.05                  | -0.22 | 0.19  | 0.74645 | 0.96075 | -0.11                      | -0.27 | -0.01 | 0.04  | 0.18  | -0.45                 | -0.17 |   |   |   |
| HILICpos_908.4691_0.43 | HILIC | pos        | 0.43            | 908.4691   |            |      | 4        |         | 0.90339                                 | 0.96437 | -0.06 | -0.29 | 0.38  | -0.01                 | 0.28  | 0.39  | 0.57342 | 0.92255 | -0.19                      | -0.06 | -0.08 | -0.36 | 0.15  | -0.60                 | 0.06  |   |   |   |
| RPpos_908.4695_11.39   | RP    | pos        | 11.39           | 908.4695   |            |      | 4        |         | 0.95952                                 | 0.98578 | -0.03 | -0.26 | 0.81  | 0.16                  | -0.11 | 0.59  | 0.94399 | 0.99197 | -0.10                      | -0.12 | -0.09 | -0.01 | 0.05  | -0.59                 | -0.12 |   |   |   |
| RPpos_909.4315_12.19   | RP    | pos        | 12.19           | 909.4315   |            |      | 4        |         | 0.97437                                 | 0.99033 | -0.02 | -0.26 | 0.42  | 0.06                  | -0.08 | 0.45  | 0.95793 | 0.99495 | -0.07                      | -0.29 | -0.08 | 0.05  | 0.12  | -0.60                 | -0.05 |   |   |   |
| RPpos_911.4976_12.62   | RP    | pos        | 12.62           | 911.4976   |            |      | 4        |         | 0.59848                                 | 0.82782 | 0.13  | 0.02  | 0.37  | 0.46                  | 0.05  | 0.45  | 0.73173 | 0.95793 | -0.11                      | -0.40 | -0.29 | -0.08 | 0.00  | 0.20                  | -0.11 |   |   |   |
| HILICpos_912.5765_0.5  | HILIC | pos        | 0.5             | 912.5765   |            |      | 4        |         | 0.87338                                 | 0.95270 | -0.03 | 0.15  | 0.16  | 0.20                  | -0.17 | 0.37  | 0.42988 | 0.87352 | 0.17                       | 0.23  | 0.13  | 0.11  | 0.95  | -0.31                 | -0.10 |   |   |   |
| HILICpos_914.4606_0.78 | HILIC | pos        | 0.78            | 914.4606   |            |      | 4        |         | 0.60928                                 | 0.83311 | -0.15 | -0.23 | 0.33  | -0.25                 | 0.75  | 0.00  | 0.33262 | 0.82228 | 0.65                       | 0.78  | 0.45  | 1.30  | -0.01 | 0.21                  | -0.16 |   |   |   |
| RPneg_914.58875_12.589 | RP    | neg        | 12.589          | 914.5888   |            |      | 4        |         | 0.62183                                 | 0.83934 | 0.13  | 0.14  | 0.18  | 0.00                  | 0.19  | 0.79  | 0.94130 | 0.99159 | 0.05                       | -0.07 | 0.16  | 0.15  | -0.14 | 0.24                  | 0.15  |   |   |   |
| HILICpos_915.4881_0.45 | HILIC | pos        | 0.45            | 915.4881   |            |      | 4        |         | 0.31249                                 | 0.64048 | 0.26  | -0.22 | 1.41  | 0.66                  | -0.05 | 1.07  | 0.88152 | 0.98281 | -0.03                      | -0.12 | 0.28  | 0.09  | 0.48  | -0.32                 | -0.23 |   |   |   |
| RPpos_915.4911_11.17   | RP    | pos        | 11.17           | 915.4911   |            |      | 4        |         | 0.74628                                 | 0.89882 | 0.07  | -0.23 | 0.55  | 0.05                  | 0.28  | 0.62  | 0.01814 | 0.28746 | -0.44                      | -0.47 | -0.23 | -0.38 | -0.58 | -0.50                 | -0.24 |   |   |   |
| RPpos_916.4503_11.88   | RP    | pos        | 11.88           | 916.4503   |            |      | 4        |         | 0.72943                                 | 0.88974 | 0.06  | -0.27 | 0.79  | 0.00                  | 0.05  | 0.52  | 0.63105 | 0.93546 | -0.19                      | -0.12 | -0.18 | -0.09 | 0.14  | -0.69                 | -0.18 |   |   |   |
| RPneg_916.5348_12.393  | RP    | neg        | 12.393          | 916.5348   |            |      | 4        |         | 0.62139                                 | 0.83908 | -0.14 | -0.27 | 0.24  | -0.05                 | -0.22 | -0.12 | 0.97199 | 0.99673 | 0.00                       | 0.01  | 0.64  | 0.24  | 0.05  | -0.34                 | -0.27 |   |   |   |
| RPneg_918.54468_12.719 | RP    | neg        | 12.719          | 918.5447   |            |      | 4        |         | 0.15395                                 | 0.49686 | -0.40 | -0.36 | 0.05  | -0.21                 | -0.30 | -0.20 | 0.67347 | 0.94630 | -0.14                      | -0.36 | -0.25 | 0.04  | 0.74  | -0.09                 | -0.64 |   |   |   |
| RPneg_918.54529_12.944 | RP    | neg        | 12.944          | 918.5453   |            |      | 4        |         | 0.02876                                 | 0.31745 | -0.79 | -0.36 | -0.88 | -0.49                 | -0.19 | -0.25 | 0.84418 | 0.97670 | -0.06                      | 0.94  | -0.16 | -0.41 | 0.03  | 1.63                  | -0.61 |   |   |   |
| RPneg_919.60101_9.174  | RP    | neg        | 9.174           | 919.6010   |            |      | 4        |         | 0.00287                                 | 0.10999 | -0.96 | 0.17  | 1.31  | 1.38                  | 1.43  | 1.06  |         |         |                            |       |       |       |       |                       |       |   |   |   |

| Feature_ID             | Mode  | Ionization | Average_Rt.min. | Average_Mz | Metabolite | MSMS | ID_Level | HMDB_ID | IV-Alcohol self-administration (IV-ASA) |         |        |       |        |       |                       |       |         |         |       |       | IV-Alcohol clamp (IV-AC)   |       |        |       |          |   |                       |   |         |   |        |   |
|------------------------|-------|------------|-----------------|------------|------------|------|----------|---------|-----------------------------------------|---------|--------|-------|--------|-------|-----------------------|-------|---------|---------|-------|-------|----------------------------|-------|--------|-------|----------|---|-----------------------|---|---------|---|--------|---|
|                        |       |            |                 |            |            |      |          |         | Area Under the Curve (AUC)              |         |        |       |        |       | IV-Ghrelin or Placebo |       |         |         |       |       | Area Under the Curve (AUC) |       |        |       |          |   | IV-Ghrelin or Placebo |   |         |   |        |   |
|                        |       |            |                 |            |            |      |          |         | Baseline                                |         | IV-ASA |       | BrAc=0 |       | Baseline              |       | Post-LD |         | IV-AC |       | Post-AC                    |       | BrAc=0 |       | Baseline |   | IV-AC                 |   | Post-AC |   | BrAc=0 |   |
|                        |       |            |                 |            |            |      |          |         | p                                       | q       | d      | d     | d      | d     | p                     | q     | d       | d       | d     | d     | p                          | q     | d      | d     | d        | d | p                     | q | d       | d | d      | d |
| HILICpos_960.474_0.42  | HILIC | pos        | 0.42            | 960.4740   |            |      | 4        |         | 0.28907                                 | 0.62228 | 0.22   | -0.25 | 0.84   | 0.27  | 0.35                  | 0.50  | 0.59118 | 0.92657 | -0.22 | -0.02 | -0.35                      | -0.05 | 0.14   | -0.59 | -0.24    |   |                       |   |         |   |        |   |
| RPpos_960.4779_11.85   | RP    | pos        | 11.85           | 960.4779   |            |      | 4        |         | 0.90083                                 | 0.96348 | 0.02   | -0.49 | 1.15   | 0.24  | -0.13                 | 0.39  | 0.28912 | 0.79431 | -0.30 | -0.21 | -0.19                      | -0.12 | -0.02  | -0.65 | -0.14    |   |                       |   |         |   |        |   |
| HILICpos_960.5921_0.64 | HILIC | pos        | 0.64            | 960.5921   |            |      | 4        |         | 0.27618                                 | 0.61132 | -0.35  | -0.70 | 0.30   | -0.74 | 0.45                  | 0.44  | 0.02459 | 0.32996 | -0.68 | -0.29 | -0.47                      | -0.47 | -0.21  | -0.34 | -0.52    |   |                       |   |         |   |        |   |
| RPneg_961.18115_9.371  | RP    | neg        | 9.371           | 961.1812   |            |      | 4        |         | 0.25207                                 | 0.59089 | -0.22  | -0.50 | -0.22  | -0.04 | 0.17                  | -0.50 | 0.25841 | 0.77329 | 0.33  | -0.11 | -0.34                      | 0.67  | 0.39   | 0.48  | 0.37     |   |                       |   |         |   |        |   |
| RPneg_961.60583_11.388 | RP    | neg        | 11.388          | 961.6058   |            |      | 4        |         | 0.71335                                 | 0.88230 | 0.22   | -0.70 | -0.28  | 1.00  | 0.16                  | -0.35 | 0.94896 | 0.44822 | -0.58 | -0.27 | -0.33                      | 0.11  | -0.21  | -0.61 | -0.53    |   |                       |   |         |   |        |   |
| RPpos_962.6337_11.52   | RP    | pos        | 11.52           | 962.6337   |            |      | 4        |         | 0.09077                                 | 0.41922 | -0.42  | -0.00 | -0.17  | 0.17  | -0.00                 | 0.00  | 0.53166 | 0.81262 | -0.21 | -0.12 | -0.10                      | 0.21  | 0.25   | 0.42  | 0.91     |   |                       |   |         |   |        |   |
| RPneg_965.11945_9.808  | RP    | neg        | 9.808           | 965.1195   |            |      | 4        |         | 0.20168                                 | 0.54659 | -0.34  | 0.01  | -0.04  | -0.10 | -0.43                 | 0.10  | 0.74808 | 0.96115 | -0.10 | 0.01  | -0.49                      | -0.45 | -0.48  | 0.87  | 0.57     |   |                       |   |         |   |        |   |
| HILICpos_966.5289_0.47 | HILIC | pos        | 0.47            | 966.5289   |            |      | 4        |         | 0.72099                                 | 0.88627 | -0.13  | -0.15 | 1.21   | -0.26 | -0.12                 | 0.60  | 0.71917 | 0.95532 | -0.15 | -0.11 | -0.20                      | -0.20 | -0.07  | -0.14 | -0.15    |   |                       |   |         |   |        |   |
| RPpos_966.5317_10.95   | RP    | pos        | 10.95           | 966.5317   |            |      | 4        |         | 0.92075                                 | 0.97116 | -0.05  | -0.50 | 1.11   | -0.05 | -0.18                 | 0.16  | 0.94793 | 0.99293 | -0.03 | -0.27 | 0.11                       | 0.22  | 0.36   | -0.63 | -0.08    |   |                       |   |         |   |        |   |
| RPneg_966.56848_9.998  | RP    | neg        | 9.998           | 966.5685   |            |      | 4        |         | 0.90477                                 | 0.96491 | 0.03   | 0.00  | 0.03   | 0.04  | 0.18                  | 0.17  | 0.13619 | 0.63435 | 0.25  | 0.02  | 0.15                       | 0.20  | 0.59   | 0.38  | 0.15     |   |                       |   |         |   |        |   |
| HILICpos_967.4904_0.43 | HILIC | pos        | 0.43            | 967.4904   |            |      | 4        |         | 0.56512                                 | 0.81168 | 0.12   | -0.14 | 0.81   | -0.03 | 0.14                  | 1.05  | 0.85025 | 0.97755 | -0.13 | -0.19 | 0.26                       | 0.03  | 0.50   | -0.99 | -0.41    |   |                       |   |         |   |        |   |
| RPpos_967.4924_11.59   | RP    | pos        | 11.59           | 967.4924   |            |      | 4        |         | 0.72388                                 | 0.88739 | 0.09   | -0.14 | 0.59   | 0.00  | 0.30                  | 0.26  | 0.84816 | 0.97736 | -0.14 | -0.09 | 0.08                       | -0.27 | 0.07   | -0.49 | -0.19    |   |                       |   |         |   |        |   |
| RPpos_968.4544_12.47   | RP    | pos        | 12.47           | 968.4544   |            |      | 4        |         | 0.43037                                 | 0.73046 | 0.18   | -0.36 | 0.67   | 0.41  | 0.11                  | 0.72  | 0.48842 | 0.89812 | -0.24 | -0.13 | -0.26                      | -0.14 | 0.19   | -0.83 | -0.17    |   |                       |   |         |   |        |   |
| HILICneg_970.1821_0.52 | HILIC | neg        | 0.52            | 970.1821   |            |      | 4        |         | 0.07694                                 | 0.39797 | -0.25  | -0.14 | -0.09  | -0.02 | -0.05                 | -0.07 | 0.00114 | 0.06196 | 0.34  | -0.18 | 0.25                       | 0.62  | 0.24   | 0.39  | 0.43     |   |                       |   |         |   |        |   |
| HILICneg_971.2211_0.37 | HILIC | neg        | 0.37            | 971.2211   |            |      | 4        |         | 0.16089                                 | 0.50434 | -0.44  | -0.25 | -0.11  | -0.02 | 0.02                  | -0.30 | 0.77136 | 0.96458 | -0.03 | 0.57  | 0.26                       | -0.19 | 0.18   | -0.15 | -0.60    |   |                       |   |         |   |        |   |
| RPneg_971.60547_10.308 | RP    | neg        | 10.308          | 971.6055   |            |      | 4        |         | 0.05142                                 | 0.34857 | -0.42  | -0.10 | 0.05   | -0.39 | -0.29                 | -0.21 | 0.56414 | 0.92038 | -0.15 | -0.19 | -0.16                      | -0.02 | 0.16   | -0.13 | -0.41    |   |                       |   |         |   |        |   |
| RPpos_973.548_10.72    | RP    | pos        | 10.72           | 973.5480   |            |      | 4        |         | 0.92623                                 | 0.97350 | 0.02   | -0.05 | 0.50   | -0.03 | 0.09                  | 0.59  | 0.70541 | 0.95242 | -0.11 | -0.12 | -0.12                      | 0.01  | -0.14  | -0.13 | -0.17    |   |                       |   |         |   |        |   |
| RPpos_973.6216_10.29   | RP    | pos        | 10.29           | 973.6216   |            |      | 4        |         | 0.18484                                 | 0.53123 | -0.22  | -0.29 | 0.03   | 0.27  | -0.09                 | -0.48 | 0.73123 | 0.95785 | -0.06 | 0.04  | -0.13                      | -0.14 | 0.22   | 0.04  | -0.15    |   |                       |   |         |   |        |   |
| RPpos_974.51_11.36     | RP    | pos        | 11.36           | 974.5100   |            |      | 4        |         | 0.83552                                 | 0.93852 | -0.06  | -0.55 | 0.89   | 0.01  | -0.10                 | 0.29  | 0.67844 | 0.94718 | 0.21  | 0.00  | -0.33                      | 0.11  | -0.21  | 0.05  | -0.25    |   |                       |   |         |   |        |   |
| HILICpos_974.5122_0.44 | HILIC | pos        | 0.44            | 974.5122   |            |      | 4        |         | 0.68954                                 | 0.87654 | -0.12  | -0.32 | 0.29   | -0.17 | -0.11                 | 0.63  | 0.66138 | 0.94278 | -0.15 | -0.11 | -0.13                      | -0.14 | 0.12   | -0.60 | 0.10     |   |                       |   |         |   |        |   |
| RPpos_975.4708_12.13   | RP    | pos        | 12.13           | 975.4708   |            |      | 4        |         | 0.98432                                 | 0.99408 | 0.00   | 0.00  | 0.37   | -0.12 | -0.02                 | 0.63  | 0.29720 | 0.79957 | -0.48 | -0.11 | -0.29                      | 0.10  | 0.04   | -1.11 | -0.38    |   |                       |   |         |   |        |   |
| RPpos_975.6416_10.43   | RP    | pos        | 10.43           | 975.6416   |            |      | 4        |         | 0.92917                                 | 0.97471 | -0.08  | -0.11 | 0.17   | 0.37  | 0.14                  | -0.09 | 0.80379 | 0.96983 | 0.11  | -0.43 | 0.36                       | -0.03 | 0.46   | 0.10  | -0.19    |   |                       |   |         |   |        |   |
| RPneg_977.14502_9.635  | RP    | neg        | 9.635           | 977.1450   |            |      | 4        |         | 0.70417                                 | 0.87908 | -0.14  | -0.11 | 0.50   | 0.26  | -0.01                 | -0.42 | 0.58132 | 0.92438 | -0.13 | 0.16  | -0.28                      | 0.40  | -0.16  | -0.88 | 0.25     |   |                       |   |         |   |        |   |
| RPpos_979.5789_10.24   | RP    | pos        | 10.24           | 979.5789   |            |      | 4        |         | 0.54392                                 | 0.80034 | 0.17   | -0.16 | 0.38   | 0.49  | 0.37                  | 0.26  | 0.55562 | 0.91894 | -0.18 | -0.65 | -0.61                      | -0.02 | 0.32   | 0.03  | -0.43    |   |                       |   |         |   |        |   |
| RPneg_979.59833_9.877  | RP    | neg        | 9.877           | 979.5983   |            |      | 4        |         | 0.39023                                 | 0.70143 | -0.16  | 0.00  | -0.06  | -0.02 | 0.21                  | -0.24 | 0.41073 | 0.86351 | -0.27 | -0.34 | -0.25                      | -0.29 | 0.20   | -0.30 | -0.25    |   |                       |   |         |   |        |   |
| RPneg_980.51691_12.947 | RP    | neg        | 12.947          | 980.5169   |            |      | 4        |         | 0.20457                                 | 0.54850 | -0.39  | -0.35 | -0.08  | 0.19  | -0.43                 | -0.86 | 0.72909 | 0.95711 | -0.06 | -0.50 | 0.21                       | 0.12  | -0.02  | -0.12 | -0.32    |   |                       |   |         |   |        |   |
| RPneg_980.52039_12.72  | RP    | neg        | 12.72           | 980.5204   |            |      | 4        |         | 0.81742                                 | 0.93044 | -0.02  | 0.64  | 0.52   | -0.56 | 0.43                  | -0.22 | 0.36390 | 0.83767 | 0.27  | -0.06 | -0.06                      | 0.16  | 0.28   | 0.37  | 0.41     |   |                       |   |         |   |        |   |
| RPpos_981.5308_11.15   | RP    | pos        | 11.15           | 981.5308   |            |      | 4        |         | 0.56329                                 | 0.81086 | 0.11   | -0.49 | 0.66   | 0.32  | 0.13                  | 0.88  | 0.66101 | 0.94265 | -0.15 | -0.20 | -0.15                      | -0.05 | 0.20   | -0.57 | -0.06    |   |                       |   |         |   |        |   |
| RPpos_982.488_11.84    | RP    | pos        | 11.84           | 982.4880   |            |      | 4        |         | 0.88184                                 | 0.95617 | -0.04  | -0.18 | 0.39   | -0.16 | -0.09                 | 0.77  | 0.35316 | 0.83272 | -0.46 | -0.20 | -0.21                      | -0.19 | -0.36  | -1.06 | -0.35    |   |                       |   |         |   |        |   |
| HILICpos_982.4888_0.42 | HILIC | pos        | 0.42            | 982.4888   |            |      | 4        |         | 0.67828                                 | 0.86645 | 0.13   | -0.22 | 0.74   | 0.00  | 0.16                  | 0.48  | 0.93401 | 0.98984 | -0.03 | -0.03 | -0.34                      | 0.28  | 0.67   | -0.51 | -0.02    |   |                       |   |         |   |        |   |
| RPneg_989.18567_9.362  | RP    | neg        | 9.362           | 989.1857   |            |      | 4        |         | 0.01490                                 | 0.22933 | -0.66  | -0.29 | -0.41  | -0.41 | -0.21                 | 0.20  | 0.29029 | 0.79495 | -0.26 | 0.48  | 0.03                       | -0.17 | -0.43  | -0.26 | -0.20    |   |                       |   |         |   |        |   |
| RPpos_989.5043_11.58   | RP    | pos        | 11.58           | 989.5043   |            |      | 4        |         | 0.94896                                 | 0.98117 | -0.03  | -0.37 | 0.80   | 0.04  | -0.17                 | 0.24  | 0.42536 | 0.87082 | -0.25 | -0.07 | -0.14                      | -0.16 | -0.22  | -0.59 | -0.20    |   |                       |   |         |   |        |   |
| HILICpos_989.5060_0.44 | HILIC | pos        | 0.44            | 989.5060   |            |      | 4        |         | 0.58982                                 | 0.82596 | -0.16  | 0.01  | 0.39   | 0.01  | -0.19                 | 0.01  | 0.55642 | 0.91825 | -0.26 | -0.19 | 0.10                       | -0.53 | 0.06   | -0.54 | -0.33    |   |                       |   |         |   |        |   |
| RPpos_989.6553_1.28    | RP    | pos        | 1.28            | 989.6553   |            |      | 4        |         | 0.11898                                 | 0.45534 | -0.27  | 0.10  | 0.02   | -0.28 | -0.22                 | -0.28 | 0.72789 | 0.95678 | -0.03 | -0.22 | 0.08                       | -0.17 | 0.07   | 0.13  | 0.14     |   |                       |   |         |   |        |   |
| RPpos_990.4662_12.45   | RP    | pos        | 12.45           | 990.4662   |            |      | 4        |         | 0.90749                                 | 0.96591 | -0.03  | -0.34 | 0.41   | 0.01  | -0.08                 | 0.40  | 0.46025 | 0.88511 | -0.29 | -0.11 | -0.28                      | -0.23 | -0.11  | -0.78 | -0.15    |   |                       |   |         |   |        |   |
| RPpos_991.6711_10.3    | RP    | pos        | 10.3            | 991.6711   |            |      | 4        |         | 0.02022                                 | 0.25817 | -0.33  | 0.07  | -0.08  | -0.27 | -0.28                 | -0.33 | 0.11557 | 0.59943 | -0.10 | -0.01 | -0.04                      | -0.07 | 0.08   | -0.14 | -0.31    |   |                       |   |         |   |        |   |
| HILICpos_991.6716_1.14 | HILIC | pos        | 1.14            | 991.6716   |            |      | 4        |         | 0.04413                                 | 0.33333 | -0.31  | 0.21  | -0.11  | -0.23 | -0.26                 | -0.29 | 0.26864 | 0.78099 | -0.11 | 0.17  | -0.23                      | 0.25  | 0.04   | -0.23 | -0.57    |   |                       |   |         |   |        |   |
| RPpos_991.6721_10.43   | RP    | pos        | 10.43           | 991.6721   |            |      | 4        |         | 0.01435                                 | 0.22650 | -0.36  | 0.11  | -0.02  | -0.30 | -0.19                 | -0.36 | 0.12197 | 0.60994 | -0.13 | -0.07 | 0.04                       | -0.17 | -0.06  | -0.18 | -0.24    |   |                       |   |         |   |        |   |
| RPneg_995.60803_10.269 | RP    | neg        | 10.269          | 995.6080   |            |      | 4        |         | 0.83480                                 | 0.93788 | 0.03   | -0.03 | 0.39   | 0.11  | 0.45                  | 0.41  | 0.79573 | 0.96825 | -0.16 | -0.01 | -0.15                      | -0.23 | -0.07  | 0.10  | -0.61    |   |                       |   |         |   |        |   |
| HILICpos_996.522_0.45  | HILIC | pos        | 0.45            | 996.5220   |            |      | 4        |         | 0.96006                                 | 0.98597 | -0.03  | -0.11 | 0.32   | -0.22 | 0.15                  | 1.24  | 0.48979 | 0.89836 | -0.23 | -0.08 | -0.29                      | -0.07 | -0.12  | -0.32 | -0.09    |   |                       |   |         |   |        |   |
| RPpos_996.5261_11.35   | RP    | pos        | 11.35           | 996.5261   |            |      | 4        |         | 0.82991                                 | 0.93540 | -0.06  | -0.25 | 0.40   | -0.13 | 0.02                  | 0.47  | 0.72657 | 0.95615 | 0.06  | -0.33 | 0.13                       | 0.01  | 0.21   | -0.33 | 0.14     |   |                       |   |         |   |        |   |
| RPpos_997.4874_12.11   | RP    | pos        | 12.11           | 997.4874   |            |      | 4        |         | 0.63896                                 | 0.84724 | 0.11   | -0.16 | 0.97   | 0.03  | 0.08                  | 0.23  | 0.06769 | 0.50095 | -0.36 | -0.37 | -0.25                      | -0.24 | -0.14  | -0.49 | -0.53    |   |                       |   |         |   |        |   |
| RPneg_997.62061_10.459 | RP    | neg        | 10.459          | 997.6206   |            |      | 4        |         | 0.26339                                 | 0.60057 | -0.32  | -0.12 | -0.23  | 0.17  | -0.37                 | 0.33  | 0.95702 | 0.99463 | -0.01 | -0.12 | -0.08                      | 0.22  | 0.21   | 0.00  | 0.01     |   |                       |   |         |   |        |   |
| RPpos_997.6241_10.12   | RP    | pos        | 10.12           | 997.6241   |            |      | 4        |         | 0.08310                                 | 0.40798 | -0.31  | -0.06 | 0.00   | -0.12 | -0.27                 | -0.36 | 0.83807 | 0.97596 | -0.07 | 0.02  | -0.15                      | 0.07  | 0.22   | 0.04  | -0.34    |   |                       |   |         |   |        |   |
| RPpos_997.6243_10.25   | RP    | pos        | 10.25           | 997.6243   |            |      | 4        |         | 0.30258                                 | 0.63180 | -0.26  | -0.35 | 0.05   | -0.11 | -0.18                 | -0.02 | 0.73740 | 0.95884 | -0.11 | -0.18 | -0.21                      | 0.06  | 0.18   | -0.15 | -0.33    |   |                       |   |         |   |        |   |
| RPneg_997.6286_10.454  | RP    | neg        | 10.454          | 997.6287   |            |      | 4        |         | 0.17484                                 | 0.52046 | -0.34  | -0.31 | -0.08  | -0.09 | -0.03                 | 0.00  | 0.78661 | 0.96713 | -0.05 | -0.04 | 0.17                       | 0.03  | 0.24   | -0.32 | -0.35    |   |                       |   |         |   |        |   |
| RPpos_999.2064_9.85    | RP    | pos        | 9.85            | 999.2064   |            |      | 4        |         | 0.48741                                 | 0.77461 | -0.21  | -0.21 | -0.08  | -0.02 | 0.07                  | 0.15  | 0.66543 | 0.94361 | -0.08 | -0.35 | -0.17                      | -0.20 | 0.22   | 0.07  | 0.33     |   |                       |   |         |   |        |   |
| RPneg_999.21381_9.388  | RP    | neg        | 9.388           | 999.2138   |            |      | 4        |         | 0.43396                                 | 0.73265 | 0.27   | 0.69  | 0.35   | 0.16  | 0.41                  | 1.82  | 0.71146 | 0.95302 | -0.13 | -0.64 | 1.54                       | -1.71 | 0.19   | -0.77 | 0.64     |   |                       |   |         |   |        |   |
| RPpos_1001.657_10.55   | RP    | pos        | 10.55           | 1001.6570  |            |      |          |         |                                         |         |        |       |        |       |                       |       |         |         |       |       |                            |       |        |       |          |   |                       |   |         |   |        |   |

| Feature_ID              | Mode  | Ionization | Average_RT.min. | Average_Mz | Metabolite | MSMS | ID_Level | HMDB_ID | IV-Alcohol self-administration (IV-ASA) |         |       |       |       |                       |       |       |         |         | IV-Alcohol clamp (IV-AC)   |       |       |       |       |                       |       |   |   |   |
|-------------------------|-------|------------|-----------------|------------|------------|------|----------|---------|-----------------------------------------|---------|-------|-------|-------|-----------------------|-------|-------|---------|---------|----------------------------|-------|-------|-------|-------|-----------------------|-------|---|---|---|
|                         |       |            |                 |            |            |      |          |         | Area Under the Curve (AUC)              |         |       |       |       | IV-Ghrelin or Placebo |       |       |         |         | Area Under the Curve (AUC) |       |       |       |       | IV-Ghrelin or Placebo |       |   |   |   |
|                         |       |            |                 |            |            |      |          |         | Baseline                                |         |       |       |       | BrAC=0                |       |       |         |         | Baseline                   |       |       |       |       | Post-AC               |       |   |   |   |
|                         |       |            |                 |            |            |      |          |         | p                                       | q       | d     | d     | d     | d                     | d     | d     | d       | d       | p                          | q     | d     | d     | d     | d                     | d     | d | d | d |
| RPneg_1031.62903_10.058 | RP    | neg        | 10.058          |            |            |      | 4        |         | 0.16538                                 | 0.51065 | -0.24 | 0.05  | -0.19 | -0.17                 | -0.15 | -0.28 | 0.54573 | 0.91584 | 0.22                       | 0.19  | 0.26  | 0.24  | 0.37  | 0.16                  | 0.38  |   |   |   |
| HILICpos_1032.5777_0.43 | HILIC | pos        | 0.43            | 1032.5770  |            |      | 4        |         | 0.60457                                 | 0.83154 | -0.14 | -0.01 | 0.36  | 0.07                  | -0.37 | 0.77  | 0.65361 | 0.94010 | -0.03                      | -0.06 | 0.12  | -0.18 | 0.09  | -0.05                 | -0.11 |   |   |   |
| RPpos_1033.5353_11.56   | RP    | pos        | 11.56           | 1033.5353  |            |      | 4        |         | 0.71763                                 | 0.88483 | 0.07  | -0.24 | 0.58  | 0.13                  | 0.46  | 0.82  | 0.48349 | 0.89638 | -0.22                      | -0.10 | -0.18 | 0.02  | -0.07 | -0.49                 | -0.36 |   |   |   |
| RPpos_1034.4968_12.41   | RP    | pos        | 12.41           | 1034.4968  |            |      | 4        |         | 0.44267                                 | 0.73864 | 0.17  | -0.16 | 0.53  | 0.16                  | 0.38  | 0.17  | 0.17993 | 0.69487 | -0.37                      | -0.18 | -0.12 | -0.34 | -0.31 | -0.88                 | -0.03 |   |   |   |
| HILICneg_1035.1978_0.48 | HILIC | neg        | 0.48            | 1035.1978  |            |      | 4        |         | 0.40615                                 | 0.74267 | 0.21  | 0.25  | 0.90  | 0.30                  | 0.07  | 0.31  | 0.00991 | 0.21165 | -0.78                      | -0.78 | -0.46 | -0.79 | -0.91 | -0.69                 | -0.56 |   |   |   |
| RPneg_1035.6586_10.16   | RP    | neg        | 10.16           | 1035.6586  |            |      | 4        |         | 0.14625                                 | 0.31617 | -0.24 | 0.13  | 0.13  | -0.22                 | -0.16 | -0.33 | 0.19417 | 0.78871 | -0.23                      | -0.21 | 0.23  | -0.17 | -0.15 | -0.26                 | -0.14 |   |   |   |
| HILICneg_1035.6655_1.34 | HILIC | neg        | 1.34            | 1035.6655  |            |      | 4        |         | 0.02684                                 | 0.28244 | -0.37 | -0.19 | -0.16 | -0.32                 | -0.31 | -0.38 | 0.04570 | 0.42948 | -0.29                      | 0.06  | -0.28 | -0.32 | -0.22 | -0.31                 | -0.36 |   |   |   |
| HILICpos_1037.6511_1.25 | HILIC | pos        | 1.25            | 1037.6511  |            |      | 4        |         | 0.20861                                 | 0.55161 | -0.40 | -0.04 | -0.15 | 0.13                  | -0.20 | -0.48 | 0.26165 | 0.77484 | 0.52                       | 0.10  | 0.38  | 0.25  | 1.31  | 0.33                  | -0.15 |   |   |   |
| RPpos_1037.6534_10.29   | RP    | pos        | 10.29           | 1037.6534  |            |      | 4        |         | 0.00342                                 | 0.11973 | -0.41 | 0.00  | -0.23 | -0.41                 | -0.22 | 0.12  | 0.73813 | 0.95902 | 0.00                       | -0.03 | 0.12  | -0.14 | 0.23  | -0.01                 | -0.29 |   |   |   |
| RPpos_1039.6707_10.12   | RP    | pos        | 10.12           | 1039.6707  |            |      | 4        |         | 0.09137                                 | 0.42010 | -0.31 | -0.23 | -0.16 | -0.21                 | -0.16 | -0.45 | 0.83496 | 0.97543 | -0.05                      | -0.19 | -0.09 | 0.04  | 0.18  | -0.07                 | -0.22 |   |   |   |
| RPpos_1039.6709_10.24   | RP    | pos        | 10.24           | 1039.6709  |            |      | 4        |         | 0.09453                                 | 0.42365 | -0.36 | -0.29 | -0.18 | -0.16                 | -0.30 | -0.26 | 0.88535 | 0.98281 | -0.05                      | -0.12 | -0.11 | 0.11  | 0.20  | -0.10                 | -0.28 |   |   |   |
| HILICpos_1039.6721_1.15 | HILIC | pos        | 1.15            | 1039.6721  |            |      | 4        |         | 0.01167                                 | 0.20787 | -0.35 | 0.05  | -0.09 | -0.26                 | -0.27 | -0.39 | 0.24183 | 0.75828 | -0.02                      | 0.05  | 0.00  | 0.15  | 0.17  | -0.12                 | -0.19 |   |   |   |
| RPpos_1041.5096_12.08   | RP    | pos        | 12.08           | 1041.5096  |            |      | 4        |         | 0.86751                                 | 0.95051 | -0.04 | -0.23 | 0.43  | -0.16                 | -0.01 | 0.36  | 0.71604 | 0.95429 | -0.18                      | -0.21 | -0.03 | 0.03  | -0.15 | -0.83                 | -0.28 |   |   |   |
| HILICpos_1041.5109_0.42 | HILIC | pos        | 0.42            | 1041.5109  |            |      | 4        |         | 0.73342                                 | 0.89201 | 0.08  | -0.18 | 0.52  | 0.05                  | -0.01 | 1.06  | 0.79176 | 0.96742 | -0.10                      | -0.26 | -0.19 | 0.11  | 0.14  | -0.43                 | -0.02 |   |   |   |
| RPpos_1042.4753_13.23   | RP    | pos        | 13.23           | 1042.4753  |            |      | 4        |         | 0.67334                                 | 0.86385 | -0.05 | -0.06 | 0.66  | -0.16                 | -0.10 | 0.02  | 0.43667 | 0.87672 | -0.25                      | -0.03 | -0.17 | -0.08 | -0.24 | -0.75                 | -0.28 |   |   |   |
| RPneg_1043.14954_9.593  | RP    | neg        | 9.593           | 1043.1495  |            |      | 4        |         | 0.49475                                 | 0.77346 | 0.23  | 1.81  | 1.14  | 0.42                  | 0.20  | 0.97  | 0.79015 | 0.96713 | -0.05                      | -0.59 | 0.76  | -0.03 | 0.00  | 0.15                  | -0.41 |   |   |   |
| RPpos_1043.7046_10.55   | RP    | pos        | 10.55           | 1043.7046  |            |      | 4        |         | 0.12936                                 | 0.46574 | -0.22 | -0.12 | -0.08 | -0.17                 | -0.01 | -0.19 | 0.51681 | 0.90772 | 0.19                       | 0.03  | 0.23  | 0.19  | 0.32  | 0.21                  | 0.05  |   |   |   |
| RPneg_1045.20605_10.194 | RP    | neg        | 10.194          | 1045.2061  |            |      | 4        |         | 0.04637                                 | 0.33835 | -0.38 | 0.32  | -0.29 | -0.06                 | -0.45 | -0.23 | 0.44484 | 0.88012 | -0.21                      | -0.40 | 0.32  | -0.16 | -0.63 | -0.42                 | -0.47 |   |   |   |
| RPneg_1045.2063_10.077  | RP    | neg        | 10.077          | 1045.2063  |            |      | 4        |         | 0.62276                                 | 0.83046 | 0.10  | 0.33  | 0.60  | 0.38                  | -0.13 | 1.09  | 0.71250 | 0.95351 | 0.12                       | -0.52 | 0.46  | 0.65  | 0.22  | -0.14                 | -0.48 |   |   |   |
| RPpos_1045.6283_10.12   | RP    | pos        | 10.12           | 1045.6283  |            |      | 4        |         | 0.12424                                 | 0.45947 | 0.39  | -0.19 | -0.03 | -0.29                 | -0.27 | -0.54 | 0.32570 | 0.81856 | 0.47                       | 0.11  | 0.36  | 0.23  | 1.58  | 0.22                  | -0.10 |   |   |   |
| RPneg_1045.67944_10.653 | RP    | neg        | 10.653          | 1045.6794  |            |      | 4        |         | 0.01271                                 | 0.21578 | -0.44 | -0.13 | -0.19 | -0.29                 | -0.48 | -0.34 | 0.58964 | 0.92655 | 0.11                       | 0.28  | 0.26  | 0.30  | 0.30  | -0.12                 | -0.16 |   |   |   |
| RPpos_1046.8456_14.09   | RP    | pos        | 14.09           | 1046.8456  |            |      | 4        |         | 0.72446                                 | 0.88762 | 0.01  | 0.79  | -0.05 | 0.50                  | -0.13 | 0.18  | 0.02887 | 0.35422 | -0.32                      | -0.37 | -0.22 | 0.39  | -0.22 | -0.29                 | -0.30 |   |   |   |
| RPpos_1047.5667_11.13   | RP    | pos        | 11.13           | 1047.5667  |            |      | 4        |         | 0.28359                                 | 0.61760 | 0.26  | -0.39 | 0.39  | 0.34                  | 0.39  | 0.61  | 0.26960 | 0.78175 | -0.26                      | -0.48 | -0.10 | -0.02 | 0.19  | -0.64                 | -0.34 |   |   |   |
| RPneg_1047.66699_10.327 | RP    | neg        | 10.327          | 1047.6670  |            |      | 4        |         | 0.18856                                 | 0.53474 | -0.21 | 0.17  | 0.15  | -0.22                 | 0.06  | -0.32 | 0.49774 | 0.90072 | -0.15                      | 0.18  | -0.11 | -0.25 | 0.07  | -0.09                 | -0.21 |   |   |   |
| RPpos_1047.7339_10.87   | RP    | pos        | 10.87           | 1047.7339  |            |      | 4        |         | 0.05284                                 | 0.35128 | -0.37 | -0.07 | -0.19 | -0.25                 | -0.37 | -0.35 | 0.65173 | 0.94010 | 0.23                       | 0.29  | 0.53  | 0.00  | 0.57  | 0.07                  | -0.27 |   |   |   |
| RPpos_1048.5272_11.8    | RP    | pos        | 11.8            | 1048.5272  |            |      | 4        |         | 0.86474                                 | 0.94954 | -0.04 | -0.12 | 0.52  | -0.13                 | -0.06 | 0.45  | 0.71439 | 0.95354 | -0.15                      | 0.01  | 0.00  | 0.00  | -0.26 | -0.67                 | -0.19 |   |   |   |
| HILICpos_1048.6444_0.64 | HILIC | pos        | 0.64            | 1048.6444  |            |      | 4        |         | 0.59325                                 | 0.82571 | 0.16  | 0.14  | 0.46  | 0.58                  | 0.05  | -0.25 | 0.99127 | 0.99863 | -0.03                      | -0.34 | 0.38  | -0.31 | 0.05  | 1.83                  | -0.38 |   |   |   |
| RPpos_1049.4922_12.77   | RP    | pos        | 12.77           | 1049.4922  |            |      | 4        |         | 0.99100                                 | 0.99685 | 0.01  | -0.18 | 0.59  | 0.05                  | 0.05  | 0.20  | 0.56157 | 0.92015 | -0.20                      | -0.13 | -0.01 | -0.15 | -0.06 | -0.96                 | -0.05 |   |   |   |
| RPpos_1050.5155_10.51   | RP    | pos        | 10.51           | 1050.5155  |            |      | 4        |         | 0.24437                                 | 0.58521 | -0.39 | 0.12  | 0.29  | -0.25                 | -0.09 | 0.10  | 0.63108 | 0.93546 | -0.10                      | -0.48 | -0.31 | 0.03  | 0.29  | -0.06                 | -0.25 |   |   |   |
| RPpos_1054.6222_11.05   | RP    | pos        | 11.05           | 1054.6222  |            |      | 4        |         | 0.53722                                 | 0.79713 | -0.19 | 0.28  | 0.55  | 0.07                  | -0.10 | -0.05 | 0.79282 | 0.96753 | 0.13                       | 0.43  | 1.24  | -0.39 | 0.45  | -0.11                 | 0.07  |   |   |   |
| RPpos_1054.6908_10.55   | RP    | pos        | 10.55           | 1054.6908  |            |      | 4        |         | 0.06987                                 | 0.38408 | -0.36 | 0.00  | -0.07 | -0.31                 | -0.17 | -0.39 | 0.61885 | 0.93268 | 0.20                       | 0.25  | 0.26  | -0.29 | 0.20  | 0.09                  | -0.13 |   |   |   |
| HILICpos_1055.5463_0.45 | HILIC | pos        | 0.45            | 1055.5463  |            |      | 4        |         | 0.48120                                 | 0.78462 | 0.11  | -0.29 | 1.18  | 0.05                  | -0.06 | 1.14  | 0.69889 | 0.95138 | -0.12                      | -0.27 | -0.28 | -0.07 | -0.02 | 0.01                  | -0.17 |   |   |   |
| RPpos_1056.5096_12.39   | RP    | pos        | 12.39           | 1056.5096  |            |      | 4        |         | 0.75161                                 | 0.90540 | 0.06  | -0.19 | 0.37  | 0.06                  | 0.04  | 0.87  | 0.37418 | 0.84339 | -0.27                      | -0.22 | -0.28 | -0.04 | 0.30  | -0.74                 | -0.26 |   |   |   |
| RPneg_1057.64832_10.126 | RP    | neg        | 10.126          | 1057.6483  |            |      | 4        |         | 0.08083                                 | 0.40528 | -0.37 | -0.12 | -0.11 | -0.22                 | -0.25 | -0.13 | 0.90864 | 0.98698 | 0.04                       | -0.16 | -0.10 | 0.30  | 0.15  | 0.14                  | -0.08 |   |   |   |
| RPpos_1058.2656_9.65    | RP    | pos        | 9.65            | 1058.2656  |            |      | 4        |         | 0.11709                                 | 0.45287 | -0.55 | 0.48  | -1.10 | 0.02                  | 0.00  | 0.10  | 0.66436 | 0.94311 | -0.07                      | -0.52 | -0.12 | -0.01 | -0.31 | -0.11                 | -0.64 |   |   |   |
| RPpos_1058.7216_10.87   | RP    | pos        | 10.87           | 1058.7216  |            |      | 4        |         | 0.11747                                 | 0.45310 | -0.34 | 0.05  | -0.04 | -0.39                 | -0.36 | -0.20 | 0.40802 | 0.86192 | 0.01                       | -0.13 | 0.17  | 0.03  | -0.02 | 0.02                  | -0.13 |   |   |   |
| RPneg_1059.6582_10.305  | RP    | neg        | 10.305          | 1059.6582  |            |      | 4        |         | 0.81823                                 | 0.93076 | -0.08 | 0.02  | 0.22  | 0.03                  | 0.15  | 0.19  | 0.60949 | 0.93015 | 0.23                       | -0.13 | 0.30  | 0.31  | 0.51  | 0.42                  | 0.06  |   |   |   |
| HILICneg_1059.66_1.32   | HILIC | neg        | 1.32            | 1059.6600  |            |      | 4        |         | 0.01828                                 | 0.24665 | -0.38 | -0.07 | -0.11 | -0.19                 | -0.23 | -0.46 | 0.40309 | 0.85869 | -0.17                      | 0.09  | 0.10  | -0.21 | -0.11 | -0.22                 | -0.39 |   |   |   |
| RPneg_1059.66357_10.308 | RP    | neg        | 10.308          | 1059.6636  |            |      | 4        |         | 0.05869                                 | 0.36399 | -0.37 | -0.22 | -0.02 | -0.23                 | -0.42 | -0.73 | 0.56292 | 0.92016 | 0.14                       | 0.19  | 0.67  | 0.09  | 0.47  | -0.25                 | -0.19 |   |   |   |
| RPpos_1061.6538_10.12   | RP    | pos        | 10.12           | 1061.6538  |            |      | 4        |         | 0.02557                                 | 0.27934 | -0.39 | -0.18 | -0.20 | -0.19                 | -0.28 | -0.76 | 0.98937 | 0.99815 | 0.00                       | 0.03  | -0.09 | 0.04  | 0.16  | -0.03                 | -0.04 |   |   |   |
| RPpos_1061.6539_10.25   | RP    | pos        | 10.25           | 1061.6539  |            |      | 4        |         | 0.02812                                 | 0.28685 | -0.53 | -0.21 | -0.28 | -0.12                 | -0.35 | -0.22 | 0.97805 | 0.99726 | -0.03                      | 0.05  | 0.00  | 0.18  | 0.02  | -0.17                 | -0.31 |   |   |   |
| RPpos_1062.6796_10.55   | RP    | pos        | 10.55           | 1062.6796  |            |      | 4        |         | 0.03171                                 | 0.29834 | -0.26 | 0.06  | -0.05 | -0.02                 | -0.21 | -0.54 | 0.40167 | 0.85869 | 0.24                       | 0.59  | 0.12  | 0.18  | 0.31  | 0.21                  | 0.17  |   |   |   |
| RPpos_1063.157_10.12    | RP    | pos        | 10.12           | 1063.1570  |            |      | 4        |         | 0.03047                                 | 0.29493 | -0.35 | -0.26 | -0.08 | -0.13                 | -0.18 | -0.75 | 0.95070 | 0.99346 | -0.01                      | -0.07 | 0.24  | -0.01 | -0.07 | 0.00                  | -0.25 |   |   |   |
| RPpos_1063.2196_9.71    | RP    | pos        | 9.71            | 1063.2196  |            |      | 4        |         | 0.57230                                 | 0.81525 | 0.16  | -     |       |                       |       |       |         |         |                            |       |       |       |       |                       |       |   |   |   |
